# Supplementary material for: Disease-specific protein corona sensor arrays may have disease detection capacity
Source: Royal Society of Chemistry journal article supplement (doi:10.1039/c9nh00097f), 2019-01-01
Supplement: c9nh00097f1.xlsx [file c9nh00097f1.xlsx]

## Sheet: Samples Report of DOPG_5 indiv
#DOPG						DOPG_CTRL
						Spectral counts															Percent coverage															Unique peptide
#	Identified Proteins (739)	Accession Number	Molecular Weight /kDa	pI	Taxonomy	2016-03-08_DOPG_CTRL_A_01	2016-03-08_DOPG_CTRL_A_02	2016-03-08_DOPG_CTRL_A_03	2016-03-08_DOPG_CTRL_B_01	2016-03-08_DOPG_CTRL_B_02	2016-03-08_DOPG_CTRL_B_03	2016-03-08_DOPG_CTRL_C_01	2016-03-08_DOPG_CTRL_C_02	2016-03-08_DOPG_CTRL_C_03	2016-07-12_DOPG_CTRL_D_01	2016-07-12_DOPG_CTRL_D_02	2016-07-12_DOPG_CTRL_D_03	2016-07-12_DOPG_CTRL_E_01	2016-07-12_DOPG_CTRL_E_02	2016-07-12_DOPG_CTRL_E_03	2016-03-08_DOPG_CTRL_A_01	2016-03-08_DOPG_CTRL_A_02	2016-03-08_DOPG_CTRL_A_03	2016-03-08_DOPG_CTRL_B_01	2016-03-08_DOPG_CTRL_B_02	2016-03-08_DOPG_CTRL_B_03	2016-03-08_DOPG_CTRL_C_01	2016-03-08_DOPG_CTRL_C_02	2016-03-08_DOPG_CTRL_C_03	2016-07-12_DOPG_CTRL_D_01	2016-07-12_DOPG_CTRL_D_02	2016-07-12_DOPG_CTRL_D_03	2016-07-12_DOPG_CTRL_E_01	2016-07-12_DOPG_CTRL_E_02	2016-07-12_DOPG_CTRL_E_03	2016-03-08_DOPG_CTRL_A_01	2016-03-08_DOPG_CTRL_A_02	2016-03-08_DOPG_CTRL_A_03	2016-03-08_DOPG_CTRL_B_01	2016-03-08_DOPG_CTRL_B_02	2016-03-08_DOPG_CTRL_B_03	2016-03-08_DOPG_CTRL_C_01	2016-03-08_DOPG_CTRL_C_02	2016-03-08_DOPG_CTRL_C_03	2016-07-12_DOPG_CTRL_D_01	2016-07-12_DOPG_CTRL_D_02	2016-07-12_DOPG_CTRL_D_03	2016-07-12_DOPG_CTRL_E_01	2016-07-12_DOPG_CTRL_E_02
1	Apolipoprotein B-100 OS=Homo sapiens GN=APOB PE=1 SV=2	APOB_HUMAN	516	7.04	Homo sapiens	136	140	145	102	108	108	101	106	118	629	591	681	633	640	699	0.32	0.32	0.33	0.26	0.27	0.27	0.26	0.27	0.3	0.63	0.61	0.63	0.65	0.63	0.67	117	122	130	92	99	97	93	97	108	278	254	268	274	266
2	Complement C3 OS=Homo sapiens GN=C3 PE=1 SV=2	CO3_HUMAN	187	6.34	Homo sapiens	104	115	120	108	99	106	80	91	94	758	665	863	785	754	810	0.46	0.48	0.47	0.48	0.45	0.48	0.34	0.41	0.43	0.85	0.8	0.86	0.82	0.81	0.84	71	73	80	68	69	74	54	65	64	142	128	140	140	131
3	Serum albumin OS=Homo sapiens GN=ALB PE=1 SV=2	ALBU_HUMAN	69	6.21	Homo sapiens	218	231	232	228	214	214	180	175	184	326	298	394	316	506	585	0.92	0.92	0.92	0.91	0.91	0.91	0.92	0.87	0.9	0.79	0.8	0.8	0.81	0.82	0.81	84	85	79	79	82	84	80	78	81	63	63	60	61	70
4	Fibrinogen beta chain OS=Homo sapiens GN=FGB PE=1 SV=2	FIBB_HUMAN	56	8.38	Homo sapiens	75	79	71	87	94	93	91	78	87	97	88	118	102	113	128	0.61	0.56	0.65	0.58	0.59	0.66	0.63	0.6	0.64	0.66	0.64	0.73	0.72	0.71	0.72	32	31	31	34	37	37	37	33	40	34	33	35	34	32
5	Fibrinogen alpha chain OS=Homo sapiens GN=FGA PE=1 SV=2	FIBA_HUMAN	95	5.87	Homo sapiens	71	78	82	80	78	87	101	100	111	79	75	84	83	96	103	0.4	0.37	0.4	0.38	0.38	0.37	0.38	0.4	0.41	0.42	0.35	0.43	0.44	0.43	0.46	38	38	40	37	38	39	41	38	42	31	33	34	38	35
6	Myosin-9 OS=Homo sapiens GN=MYH9 PE=1 SV=4	MYH9_HUMAN	227	5.29	Homo sapiens	172	184	201	172	186	173	188	171	193	0	0	0	0	0	0	0.56	0.61	0.62	0.58	0.61	0.59	0.62	0.6	0.6	0	0	0	0	0	0	124	135	136	128	141	123	140	133	143	0	0	0	0	0
7	Beta-2-glycoprotein 1 OS=Homo sapiens GN=APOH PE=1 SV=3	APOH_HUMAN	38	8.03	Homo sapiens	75	87	104	98	85	97	82	84	96	17	20	21	22	23	24	0.64	0.7	0.76	0.63	0.72	0.68	0.72	0.75	0.63	0.46	0.46	0.49	0.51	0.43	0.46	19	21	25	24	24	24	25	26	24	13	13	13	15	13
8	Filamin-A OS=Homo sapiens GN=FLNA PE=1 SV=4	FLNA_HUMAN	281	5.95	Homo sapiens	109	129	122	113	107	119	111	113	112	0	0	0	0	0	0	0.37	0.45	0.42	0.37	0.37	0.4	0.43	0.39	0.41	0	0	0	0	0	0	77	90	85	77	79	87	87	85	83	0	0	0	0	0
9	Fibrinogen gamma chain OS=Homo sapiens GN=FGG PE=1 SV=3	FIBG_HUMAN	52	5.32	Homo sapiens	60	55	63	62	63	58	61	56	65	68	68	66	65	70	80	0.58	0.66	0.64	0.64	0.62	0.57	0.56	0.58	0.61	0.6	0.56	0.64	0.54	0.62	0.59	27	26	27	29	29	26	28	28	33	27	26	24	22	26
10	Complement C4-B OS=Homo sapiens GN=C4B PE=1 SV=2	CO4B_HUMAN	193	7.28	Homo sapiens	96	97	90	88	77	76	77	75	80	131	135	144	149	129	138	0.47	0.47	0.44	0.46	0.4	0.46	0.36	0.42	0.41	0.52	0.51	0.52	0.55	0.54	0.54	67	66	63	69	59	62	52	59	61	70	70	72	75	75
11	Talin-1 OS=Homo sapiens GN=TLN1 PE=1 SV=3	TLN1_HUMAN	270	5.94	Homo sapiens	104	119	113	127	110	129	116	118	120	0	0	0	0	0	0	0.49	0.52	0.52	0.54	0.49	0.53	0.5	0.5	0.5	0	0	0	0	0	0	87	98	95	104	86	97	91	94	94	0	0	0	0	0
12	Fibronectin OS=Homo sapiens GN=FN1 PE=1 SV=4	FINC_HUMAN	263	5.45	Homo sapiens	25	25	24	20	21	18	22	18	13	90	88	93	98	94	94	0.15	0.15	0.15	0.11	0.12	0.11	0.13	0.11	0.075	0.33	0.33	0.36	0.34	0.37	0.36	24	25	24	20	20	18	22	18	13	59	58	59	56	60
13	Alpha-2-macroglobulin OS=Homo sapiens GN=A2M PE=1 SV=3	A2MG_HUMAN	163	6.43	Homo sapiens	20	28	26	25	23	23	18	16	13	55	56	72	56	80	80	0.17	0.25	0.23	0.21	0.18	0.17	0.14	0.14	0.11	0.4	0.4	0.54	0.45	0.5	0.55	19	26	24	24	20	20	16	15	12	42	40	53	44	50
14	Complement factor H OS=Homo sapiens GN=CFH PE=1 SV=4	CFAH_HUMAN	139	6.59	Homo sapiens	39	42	38	40	41	43	36	41	36	60	58	66	62	60	56	0.3	0.36	0.36	0.33	0.36	0.36	0.3	0.37	0.35	0.44	0.37	0.5	0.46	0.48	0.46	32	32	29	31	33	34	28	32	29	41	39	45	44	44
15	Keratin, type II cytoskeletal 1 OS=Homo sapiens GN=KRT1 PE=1 SV=6	K2C1_HUMAN	66	8.33	Homo sapiens	54	52	54	34	38	39	55	53	52	78	71	74	71	49	52	0.61	0.52	0.59	0.48	0.45	0.52	0.57	0.55	0.52	0.57	0.49	0.52	0.51	0.53	0.52	44	38	43	27	30	33	42	40	40	38	38	39	37	35
16	Serotransferrin OS=Homo sapiens GN=TF PE=1 SV=3	TRFE_HUMAN	77	7.13	Homo sapiens	49	48	49	48	43	45	44	39	43	68	67	76	80	110	111	0.53	0.48	0.54	0.52	0.57	0.53	0.49	0.52	0.54	0.63	0.59	0.68	0.7	0.67	0.68	37	35	36	34	32	34	33	33	35	43	42	50	51	52
17	Ig mu chain C region OS=Homo sapiens GN=IGHM PE=1 SV=3	IGHM_HUMAN	49	6.77	Homo sapiens	61	55	55	51	56	52	50	48	48	46	42	45	48	45	49	0.54	0.54	0.53	0.5	0.51	0.54	0.5	0.5	0.5	0.43	0.41	0.42	0.48	0.41	0.52	24	24	23	21	22	24	21	20	21	16	16	15	18	15
18	Apolipoprotein A-I OS=Homo sapiens GN=APOA1 PE=1 SV=1	APOA1_HUMAN	31	5.5	Homo sapiens	27	28	27	19	21	19	31	36	33	69	57	75	70	74	78	0.54	0.66	0.72	0.63	0.48	0.58	0.64	0.7	0.69	0.8	0.74	0.78	0.79	0.78	0.73	18	23	23	14	14	15	21	24	24	30	27	34	32	32
19	Keratin, type I cytoskeletal 9 OS=Homo sapiens GN=KRT9 PE=1 SV=3	K1C9_HUMAN	62	4.89	Homo sapiens	30	30	35	22	21	21	35	42	37	50	49	50	46	31	33	0.51	0.49	0.5	0.52	0.44	0.47	0.48	0.56	0.53	0.55	0.57	0.57	0.58	0.5	0.59	22	23	26	21	19	21	25	27	22	29	26	26	28	21
20	Ig gamma-1 chain C region OS=Homo sapiens GN=IGHG1 PE=1 SV=1	IGHG1_HUMAN	36	8.31	Homo sapiens	27	31	31	35	24	30	30	26	23	55	52	67	62	76	76	0.53	0.57	0.57	0.52	0.5	0.57	0.45	0.53	0.57	0.64	0.5	0.64	0.53	0.55	0.57	14	15	16	19	14	17	15	16	13	18	17	18	16	16
21	Actin, cytoplasmic 1 OS=Homo sapiens GN=ACTB PE=1 SV=1	ACTB_HUMAN	42	5.15	Homo sapiens	58	66	84	79	73	82	66	70	68	6	8	7	7	6	8	0.68	0.72	0.68	0.72	0.7	0.74	0.75	0.74	0.69	0.12	0.18	0.23	0.18	0.19	0.19	23	24	26	26	22	25	25	28	23	5	6	6	6	5
22	Apolipoprotein E OS=Homo sapiens GN=APOE PE=1 SV=1	APOE_HUMAN	36	5.42	Homo sapiens	22	21	23	22	24	22	20	19	26	51	58	62	58	49	57	0.43	0.52	0.59	0.57	0.69	0.54	0.45	0.44	0.58	0.71	0.63	0.72	0.77	0.7	0.72	14	16	18	18	20	17	16	14	22	24	24	28	31	24
23	Alpha-1-antitrypsin OS=Homo sapiens GN=SERPINA1 PE=1 SV=3	A1AT_HUMAN	47	5.31	Homo sapiens	23	28	27	21	20	19	20	23	22	42	43	48	47	66	70	0.43	0.49	0.51	0.33	0.38	0.33	0.38	0.42	0.46	0.63	0.58	0.63	0.58	0.52	0.63	17	20	20	14	14	12	17	17	17	26	23	26	26	28
24	Haptoglobin OS=Homo sapiens GN=HP PE=1 SV=1	HPT_HUMAN	45	6.56	Homo sapiens	16	17	21	17	14	18	15	15	16	42	40	45	38	61	63	0.41	0.43	0.53	0.44	0.39	0.52	0.43	0.44	0.47	0.55	0.55	0.51	0.55	0.55	0.57	14	15	18	15	12	17	13	14	15	25	25	23	24	25
25	Thrombospondin-1 OS=Homo sapiens GN=THBS1 PE=1 SV=2	TSP1_HUMAN	129	4.51	Homo sapiens	56	61	61	50	51	49	46	51	54	0	0	0	0	0	0	0.34	0.36	0.35	0.39	0.35	0.37	0.35	0.33	0.36	0	0	0	0	0	0	37	37	38	37	39	37	36	38	40	0	0	0	0	0
26	Apolipoprotein(a) OS=Homo sapiens GN=LPA PE=1 SV=1	APOA_HUMAN	501	5.77	Homo sapiens	19	30	29	23	22	23	18	16	14	106	95	114	117	120	118	0.049	0.064	0.062	0.05	0.044	0.052	0.041	0.029	0.028	0.14	0.14	0.13	0.14	0.13	0.13	16	22	21	18	16	17	14	10	9	44	45	44	47	45
27	Apolipoprotein A-IV OS=Homo sapiens GN=APOA4 PE=1 SV=3	APOA4_HUMAN	45	5.05	Homo sapiens	20	20	25	22	18	20	25	22	25	35	34	33	28	34	38	0.51	0.53	0.53	0.55	0.41	0.43	0.49	0.47	0.56	0.55	0.61	0.58	0.59	0.62	0.63	20	19	22	21	17	18	22	19	22	24	26	26	23	25
28	C4b-binding protein alpha chain OS=Homo sapiens GN=C4BPA PE=1 SV=2	C4BPA_HUMAN	67	7.31	Homo sapiens	27	29	32	21	19	18	17	19	19	51	50	58	59	51	52	0.39	0.38	0.41	0.4	0.37	0.36	0.32	0.37	0.44	0.45	0.4	0.46	0.53	0.38	0.46	15	17	18	17	15	15	13	17	18	21	18	24	25	19
29	Keratin, type I cytoskeletal 10 OS=Homo sapiens GN=KRT10 PE=1 SV=6	K1C10_HUMAN	59	4.88	Homo sapiens	23	24	27	9	13	12	22	21	21	38	40	45	37	29	27	0.31	0.34	0.47	0.2	0.27	0.22	0.36	0.41	0.31	0.48	0.53	0.57	0.55	0.49	0.44	17	18	21	9	13	10	18	19	18	26	26	30	26	24
30	Inter-alpha-trypsin inhibitor heavy chain H4 OS=Homo sapiens GN=ITIH4 PE=1 SV=4	ITIH4_HUMAN	103	6.97	Homo sapiens	48	46	52	44	42	39	37	44	39	35	26	36	33	42	46	0.4	0.37	0.43	0.32	0.31	0.35	0.32	0.36	0.33	0.42	0.27	0.41	0.4	0.42	0.42	31	29	32	27	26	28	26	28	25	26	20	26	27	27
31	Coagulation factor V OS=Homo sapiens GN=F5 PE=1 SV=4	FA5_HUMAN	252	5.95	Homo sapiens	23	24	28	17	19	21	19	18	22	20	22	21	19	23	20	0.13	0.14	0.17	0.095	0.12	0.12	0.099	0.1	0.11	0.11	0.13	0.12	0.12	0.12	0.1	21	23	28	16	19	19	17	17	20	19	21	20	19	23
32	Clusterin OS=Homo sapiens GN=CLU PE=1 SV=1	CLUS_HUMAN	52	6.21	Homo sapiens	25	27	27	25	23	25	23	23	27	35	27	32	35	29	31	0.35	0.39	0.35	0.31	0.34	0.33	0.35	0.32	0.29	0.35	0.35	0.4	0.35	0.33	0.35	14	17	18	16	17	16	17	17	19	18	18	20	20	18
33	von Willebrand factor OS=Homo sapiens GN=VWF PE=1 SV=4	VWF_HUMAN	309	5.15	Homo sapiens	35	39	36	32	30	33	26	25	24	30	32	29	32	41	39	0.16	0.18	0.18	0.18	0.15	0.17	0.12	0.12	0.12	0.11	0.12	0.11	0.11	0.17	0.14	34	37	34	30	28	31	24	23	23	26	26	23	26	36
34	Keratin, type II cytoskeletal 2 epidermal OS=Homo sapiens GN=KRT2 PE=1 SV=2	K22E_HUMAN	65	8.17	Homo sapiens	30	29	30	21	20	19	32	30	31	44	42	38	42	22	26	0.45	0.48	0.46	0.38	0.34	0.32	0.44	0.46	0.47	0.56	0.57	0.5	0.57	0.42	0.42	22	21	19	17	15	15	23	21	22	25	25	24	27	18
35	Plasminogen OS=Homo sapiens GN=PLG PE=1 SV=2	PLMN_HUMAN	91	7.25	Homo sapiens	32	37	41	22	29	30	27	23	20	48	35	38	42	61	61	0.32	0.43	0.47	0.26	0.37	0.4	0.36	0.31	0.26	0.57	0.5	0.51	0.51	0.6	0.59	24	29	30	18	24	26	22	19	17	33	29	28	30	38
36	Gelsolin OS=Homo sapiens GN=GSN PE=1 SV=1	GELS_HUMAN	86	6.19	Homo sapiens	32	39	37	42	35	36	35	30	34	32	27	32	42	36	39	0.36	0.42	0.46	0.39	0.43	0.51	0.42	0.41	0.41	0.34	0.31	0.45	0.4	0.35	0.43	23	30	26	27	25	28	27	24	25	21	21	25	26	22
37	Ig kappa chain C region OS=Homo sapiens GN=IGKC PE=1 SV=1	IGKC_HUMAN	12	5.68	Homo sapiens	16	21	18	24	23	18	18	22	17	32	25	30	32	39	40	0.74	0.87	0.82	0.91	0.91	0.72	0.87	0.87	0.73	0.89	0.89	0.89	0.89	0.89	0.82	6	8	6	8	10	6	7	8	6	7	7	7	7	8
38	Integrin beta-3 OS=Homo sapiens GN=ITGB3 PE=1 SV=2	ITB3_HUMAN	87	4.85	Homo sapiens	30	36	43	42	41	43	41	45	33	0	2	3	5	2	2	0.31	0.34	0.36	0.36	0.31	0.38	0.38	0.39	0.31	0	0.036	0.041	0.081	0.028	0.027	22	26	30	27	28	32	30	31	22	0	2	3	5	2
39	Integrin alpha-IIb OS=Homo sapiens GN=ITGA2B PE=1 SV=3	ITA2B_HUMAN	113	5.03	Homo sapiens	31	30	33	32	28	28	30	26	29	0	0	3	0	3	3	0.29	0.3	0.36	0.32	0.33	0.26	0.32	0.27	0.27	0	0	0.026	0	0.028	0.029	23	22	25	25	23	21	25	22	22	0	0	3	0	3
40	Complement C5 OS=Homo sapiens GN=C5 PE=1 SV=4	CO5_HUMAN	188	6.49	Homo sapiens	3	6	6	3	2	3	0	0	3	84	78	85	79	86	89	0.018	0.043	0.055	0.027	0.016	0.028	0	0	0.02	0.43	0.42	0.47	0.44	0.47	0.44	3	6	6	3	2	3	0	0	3	58	59	62	59	58
41	Complement component C9 OS=Homo sapiens GN=C9 PE=1 SV=2	CO9_HUMAN	63	5.27	Homo sapiens	31	30	31	26	30	34	27	27	24	49	45	45	51	39	47	0.42	0.4	0.36	0.35	0.37	0.48	0.39	0.37	0.35	0.51	0.51	0.51	0.46	0.5	0.49	25	23	25	22	23	28	22	20	19	26	26	24	24	21
42	Prothrombin OS=Homo sapiens GN=F2 PE=1 SV=2	THRB_HUMAN	70	5.7	Homo sapiens	6	10	11	9	7	10	5	7	2	18	21	23	25	26	30	0.17	0.25	0.24	0.17	0.22	0.25	0.16	0.18	0.076	0.3	0.37	0.46	0.47	0.41	0.41	6	10	9	8	7	10	5	6	2	15	17	20	22	21
43	Complement C1q subcomponent subunit B OS=Homo sapiens GN=C1QB PE=1 SV=3	C1QB_HUMAN	27	8.87	Homo sapiens	6	7	5	5	4	3	5	6	7	11	8	6	5	8	7	0.16	0.15	0.15	0.16	0.16	0.16	0.15	0.19	0.19	0.21	0.21	0.17	0.2	0.21	0.21	5	4	4	4	4	3	3	4	5	4	4	3	4	4
44	Ig alpha-1 chain C region OS=Homo sapiens GN=IGHA1 PE=1 SV=2	IGHA1_HUMAN	38	6.49	Homo sapiens	14	10	12	18	15	13	15	12	10	21	17	21	20	21	21	0.33	0.28	0.38	0.4	0.45	0.36	0.38	0.29	0.29	0.39	0.41	0.43	0.47	0.45	0.36	9	9	10	14	13	12	13	10	9	11	11	13	12	12
45	Inter-alpha-trypsin inhibitor heavy chain H2 OS=Homo sapiens GN=ITIH2 PE=1 SV=2	ITIH2_HUMAN	106	6.85	Homo sapiens	24	22	27	20	21	25	22	19	21	33	32	38	34	37	48	0.25	0.24	0.33	0.25	0.24	0.3	0.28	0.26	0.28	0.28	0.28	0.38	0.32	0.33	0.4	21	18	23	17	18	22	19	18	19	23	22	26	24	25
46	Ig gamma-3 chain C region OS=Homo sapiens GN=IGHG3 PE=1 SV=2	IGHG3_HUMAN	41	7.95	Homo sapiens	34	31	33	29	26	28	25	25	25	47	43	44	39	57	60	0.5	0.48	0.48	0.55	0.53	0.53	0.45	0.5	0.45	0.48	0.44	0.45	0.41	0.46	0.52	7	7	7	8	8	9	8	7	7	6	6	6	5	6
47	Lipopolysaccharide-binding protein OS=Homo sapiens GN=LBP PE=1 SV=3	LBP_HUMAN	53	6.68	Homo sapiens	14	17	17	18	19	18	16	11	14	13	10	12	12	16	16	0.22	0.25	0.23	0.25	0.23	0.23	0.23	0.21	0.21	0.23	0.2	0.22	0.28	0.24	0.22	11	13	11	14	13	13	12	9	11	11	8	9	10	11
48	Vitamin D-binding protein OS=Homo sapiens GN=GC PE=1 SV=1	VTDB_HUMAN	53	5.21	Homo sapiens	14	17	19	14	20	16	17	14	15	16	19	19	15	29	32	0.35	0.38	0.43	0.31	0.46	0.47	0.37	0.33	0.35	0.35	0.4	0.44	0.39	0.58	0.54	13	15	16	12	16	14	13	11	12	13	16	17	15	21
49	Vitronectin OS=Homo sapiens GN=VTN PE=1 SV=1	VTNC_HUMAN	54	5.54	Homo sapiens	19	20	16	22	23	22	18	21	22	8	10	12	9	15	13	0.32	0.31	0.28	0.29	0.29	0.31	0.29	0.31	0.32	0.14	0.21	0.24	0.15	0.32	0.24	14	14	9	12	14	13	12	15	14	6	8	9	6	11
50	Vinculin OS=Homo sapiens GN=VCL PE=1 SV=4	VINC_HUMAN	124	5.33	Homo sapiens	25	32	31	32	23	35	33	28	30	0	0	0	0	0	0	0.31	0.38	0.35	0.37	0.26	0.39	0.36	0.3	0.32	0	0	0	0	0	0	24	31	29	30	22	33	29	25	28	0	0	0	0	0
51	Kininogen-1 OS=Homo sapiens GN=KNG1 PE=1 SV=2	KNG1_HUMAN	72	6.8	Homo sapiens	17	21	26	28	22	28	15	20	17	23	22	24	21	23	28	0.29	0.29	0.34	0.31	0.28	0.31	0.21	0.3	0.24	0.29	0.27	0.35	0.33	0.33	0.38	17	18	23	22	18	22	13	17	16	19	18	21	19	20
52	Hornerin OS=Homo sapiens GN=HRNR PE=1 SV=2	HORN_HUMAN	282	10.24	Homo sapiens	12	15	15	11	9	8	15	26	21	24	23	23	25	11	16	0.079	0.053	0.086	0.053	0.06	0.055	0.082	0.13	0.094	0.12	0.12	0.13	0.14	0.061	0.085	10	9	12	9	8	7	12	17	14	15	15	15	16	8
53	Alpha-actinin-1 OS=Homo sapiens GN=ACTN1 PE=1 SV=2	ACTN1_HUMAN	103	5.07	Homo sapiens	41	39	39	31	39	35	34	31	30	0	0	0	0	0	0	0.44	0.5	0.5	0.37	0.45	0.41	0.4	0.36	0.38	0	0	0	0	0	0	29	32	32	25	31	26	28	25	25	0	0	0	0	0
54	Complement C1r subcomponent OS=Homo sapiens GN=C1R PE=1 SV=2	C1R_HUMAN	80	6.14	Homo sapiens	8	13	11	11	8	11	8	17	15	12	12	11	13	15	18	0.13	0.17	0.16	0.15	0.13	0.19	0.099	0.23	0.16	0.18	0.18	0.21	0.23	0.28	0.32	7	12	10	10	7	11	6	15	13	10	10	11	12	15
55	Apolipoprotein D OS=Homo sapiens GN=APOD PE=1 SV=1	APOD_HUMAN	21	4.79	Homo sapiens	5	5	5	5	5	5	6	5	6	12	12	10	10	15	15	0.14	0.22	0.22	0.21	0.15	0.21	0.35	0.17	0.25	0.31	0.31	0.31	0.31	0.31	0.31	4	5	5	5	5	5	6	4	6	6	6	6	6	6
56	Ceruloplasmin OS=Homo sapiens GN=CP PE=1 SV=1	CERU_HUMAN	122	5.5	Homo sapiens	8	8	9	7	9	6	6	6	3	37	35	42	34	47	46	0.11	0.13	0.14	0.12	0.12	0.097	0.081	0.092	0.045	0.35	0.31	0.35	0.24	0.42	0.39	7	8	8	7	8	6	6	6	3	28	27	29	22	33
57	Apolipoprotein C-III OS=Homo sapiens GN=APOC3 PE=1 SV=1	APOC3_HUMAN	11	5.04	Homo sapiens	20	24	21	16	18	19	25	20	18	20	12	14	13	15	16	0.43	0.43	0.43	0.39	0.39	0.43	0.39	0.39	0.39	0.57	0.34	0.54	0.54	0.37	0.54	6	6	5	4	4	6	4	4	5	8	4	6	4	6
58	Platelet factor 4 OS=Homo sapiens GN=PF4 PE=1 SV=2	PLF4_HUMAN	11	8.78	Homo sapiens	15	13	15	15	15	13	18	11	17	0	0	0	0	0	0	0.54	0.4	0.4	0.4	0.54	0.54	0.54	0.4	0.54	0	0	0	0	0	0	8	7	7	8	10	8	11	9	11	0	0	0	0	0
59	Ig gamma-2 chain C region OS=Homo sapiens GN=IGHG2 PE=1 SV=2	IGHG2_HUMAN	36	7.66	Homo sapiens	26	27	26	22	21	24	19	23	24	56	52	80	77	90	93	0.37	0.48	0.5	0.46	0.44	0.53	0.43	0.44	0.48	0.59	0.48	0.61	0.52	0.49	0.55	3	6	4	5	6	6	5	6	6	6	6	7	6	6
60	Keratin, type I cytoskeletal 16 OS=Homo sapiens GN=KRT16 PE=1 SV=4	K1C16_HUMAN	51	4.69	Homo sapiens	11	9	12	9	7	9	12	11	11	37	34	36	39	23	29	0.13	0.11	0.19	0.18	0.14	0.2	0.22	0.19	0.25	0.56	0.57	0.55	0.52	0.51	0.52	3	2	5	5	4	6	6	6	7	23	20	20	19	18
61	Apolipoprotein A-II OS=Homo sapiens GN=APOA2 PE=1 SV=1	APOA2_HUMAN	11	6.6	Homo sapiens	8	7	6	6	6	6	7	9	9	15	19	16	16	17	19	0.22	0.22	0.47	0.22	0.21	0.46	0.47	0.22	0.47	0.69	0.69	0.69	0.69	0.69	0.69	4	4	5	4	3	4	5	4	5	9	8	8	8	8
62	Complement factor H-related protein 5 OS=Homo sapiens GN=CFHR5 PE=1 SV=1	FHR5_HUMAN	64	7.08	Homo sapiens	12	15	13	10	7	9	11	9	11	14	17	19	20	16	17	0.21	0.25	0.21	0.18	0.17	0.2	0.23	0.14	0.17	0.18	0.24	0.28	0.23	0.2	0.21	10	12	11	7	6	8	10	7	7	8	10	12	10	9
63	Properdin OS=Homo sapiens GN=CFP PE=1 SV=2	PROP_HUMAN	51	7.92	Homo sapiens	4	5	5	6	4	5	6	3	4	33	32	29	26	30	30	0.094	0.13	0.19	0.14	0.094	0.13	0.12	0.066	0.094	0.31	0.28	0.31	0.29	0.24	0.29	3	4	5	4	3	4	4	2	3	12	12	12	12	10
64	Inter-alpha-trypsin inhibitor heavy chain H1 OS=Homo sapiens GN=ITIH1 PE=1 SV=3	ITIH1_HUMAN	101	6.78	Homo sapiens	18	19	21	20	19	17	15	18	19	27	27	29	30	33	29	0.2	0.22	0.24	0.22	0.19	0.19	0.17	0.19	0.22	0.31	0.25	0.28	0.31	0.3	0.29	15	16	16	16	15	14	12	14	16	20	19	19	21	21
65	Complement factor H-related protein 1 OS=Homo sapiens GN=CFHR1 PE=1 SV=2	FHR1_HUMAN	38	7.42	Homo sapiens	17	19	22	18	20	20	21	22	19	14	12	14	12	12	9	0.44	0.34	0.42	0.38	0.36	0.46	0.34	0.34	0.28	0.39	0.27	0.35	0.36	0.31	0.25	5	4	6	5	5	6	4	3	4	6	5	5	6	5
66	Multimerin-1 OS=Homo sapiens GN=MMRN1 PE=1 SV=3	MMRN1_HUMAN	138	8.01	Homo sapiens	20	22	23	24	20	26	24	20	23	0	0	0	0	0	0	0.21	0.24	0.22	0.23	0.19	0.21	0.19	0.19	0.21	0	0	0	0	0	0	20	22	22	22	18	22	19	19	20	0	0	0	0	0
67	Immunoglobulin lambda-like polypeptide 5 OS=Homo sapiens GN=IGLL5 PE=2 SV=2	IGLL5_HUMAN	23	9.05	Homo sapiens	8	12	13	13	11	14	8	10	11	16	13	17	18	18	19	0.36	0.37	0.39	0.48	0.39	0.46	0.36	0.39	0.48	0.41	0.34	0.41	0.41	0.41	0.41	5	6	6	8	6	6	5	6	8	7	5	6	6	6
68	Complement C1q subcomponent subunit A OS=Homo sapiens GN=C1QA PE=1 SV=2	C1QA_HUMAN	26	9.45	Homo sapiens	2	2	3	2	0	2	2	2	2	3	4	4	4	4	4	0.13	0.13	0.16	0.13	0	0.13	0.13	0.13	0.13	0.14	0.14	0.14	0.14	0.14	0.14	2	2	3	2	0	2	2	2	2	3	3	3	3	3
69	Erythrocyte band 7 integral membrane protein OS=Homo sapiens GN=STOM PE=1 SV=3	STOM_HUMAN	32	8.07	Homo sapiens	18	18	21	19	15	16	17	17	16	2	0	0	2	0	0	0.51	0.46	0.58	0.5	0.47	0.47	0.49	0.5	0.48	0.069	0	0	0.076	0	0	11	11	13	12	10	10	10	11	10	2	0	0	2	0
70	Histidine-rich glycoprotein OS=Homo sapiens GN=HRG PE=1 SV=1	HRG_HUMAN	60	7.52	Homo sapiens	18	21	18	17	17	18	14	16	19	15	12	14	10	19	15	0.35	0.33	0.35	0.31	0.33	0.33	0.26	0.29	0.32	0.33	0.3	0.3	0.24	0.37	0.32	14	16	15	14	15	15	13	14	16	13	11	12	9	14
71	Serum paraoxonase/arylesterase 1 OS=Homo sapiens GN=PON1 PE=1 SV=3	PON1_HUMAN	40	4.89	Homo sapiens	9	13	14	10	9	12	11	15	14	12	11	14	12	20	20	0.36	0.52	0.5	0.32	0.29	0.41	0.44	0.55	0.61	0.39	0.26	0.53	0.37	0.54	0.56	9	12	12	9	8	11	10	14	13	10	9	12	10	13
72	Heparin cofactor 2 OS=Homo sapiens GN=SERPIND1 PE=1 SV=3	HEP2_HUMAN	57	6.89	Homo sapiens	17	17	14	18	18	13	12	16	16	29	25	30	28	37	37	0.24	0.27	0.23	0.3	0.24	0.17	0.19	0.24	0.21	0.39	0.41	0.47	0.48	0.57	0.51	12	12	10	13	13	10	9	12	11	18	17	20	20	23
73	Complement C1q subcomponent subunit C OS=Homo sapiens GN=C1QC PE=1 SV=3	C1QC_HUMAN	26	8.58	Homo sapiens	4	4	5	5	5	5	5	6	5	10	12	11	13	8	7	0.16	0.14	0.18	0.18	0.18	0.16	0.18	0.18	0.16	0.25	0.25	0.25	0.26	0.25	0.25	3	3	4	4	4	3	4	4	3	5	5	5	6	5
74	CD5 antigen-like OS=Homo sapiens GN=CD5L PE=1 SV=1	CD5L_HUMAN	38	5.15	Homo sapiens	9	12	13	12	12	14	12	12	10	12	10	11	12	11	11	0.3	0.47	0.47	0.45	0.45	0.5	0.45	0.36	0.38	0.41	0.32	0.4	0.43	0.38	0.39	7	10	10	9	9	11	9	9	8	9	8	9	10	9
75	Complement factor B OS=Homo sapiens GN=CFB PE=1 SV=2	CFAB_HUMAN	86	7.07	Homo sapiens	5	8	8	8	6	5	5	6	4	23	27	23	24	32	30	0.058	0.13	0.16	0.11	0.088	0.069	0.086	0.1	0.068	0.33	0.34	0.32	0.27	0.41	0.38	4	7	7	8	6	5	5	6	4	19	22	17	17	25
76	Complement C1s subcomponent OS=Homo sapiens GN=C1S PE=1 SV=1	C1S_HUMAN	77	4.59	Homo sapiens	5	6	6	5	6	4	7	5	8	9	12	13	11	16	12	0.11	0.12	0.12	0.093	0.1	0.054	0.13	0.1	0.13	0.14	0.15	0.2	0.18	0.25	0.2	4	5	5	4	5	3	6	5	7	7	10	12	11	14
77	Tubulin beta-1 chain OS=Homo sapiens GN=TUBB1 PE=1 SV=1	TBB1_HUMAN	50	4.82	Homo sapiens	26	25	27	24	24	26	23	24	23	0	0	0	0	0	0	0.43	0.61	0.62	0.54	0.55	0.55	0.56	0.56	0.51	0	0	0	0	0	0	21	21	22	21	21	21	20	22	20	0	0	0	0	0
78	Keratin, type II cytoskeletal 6A OS=Homo sapiens GN=KRT6A PE=1 SV=3	K2C6A_HUMAN	60	8.16	Homo sapiens	12	7	8	10	8	8	11	9	9	32	33	32	35	22	23	0.17	0.15	0.15	0.18	0.15	0.18	0.16	0.15	0.18	0.46	0.45	0.43	0.45	0.35	0.37	3	4	3	7	4	5	4	5	5	21	18	18	18	13
79	Hemoglobin subunit beta OS=Homo sapiens GN=HBB PE=1 SV=2	HBB_HUMAN	16	7.32	Homo sapiens	9	11	11	8	10	8	10	10	13	15	14	13	14	15	18	0.49	0.73	0.69	0.59	0.61	0.52	0.58	0.75	0.89	0.86	0.8	0.87	0.87	0.88	0.94	7	9	8	8	8	7	8	9	11	11	10	11	11	11
80	Band 3 anion transport protein OS=Homo sapiens GN=SLC4A1 PE=1 SV=3	B3AT_HUMAN	102	4.84	Homo sapiens	10	8	11	8	8	8	6	7	3	3	2	3	3	0	2	0.11	0.13	0.15	0.13	0.11	0.13	0.094	0.075	0.046	0.047	0.037	0.047	0.047	0	0.037	7	8	9	8	7	8	6	5	3	3	2	3	3	0
81	Hemopexin OS=Homo sapiens GN=HPX PE=1 SV=2	HEMO_HUMAN	52	7.02	Homo sapiens	5	7	7	8	6	6	6	4	6	16	10	14	13	23	22	0.13	0.17	0.18	0.24	0.21	0.24	0.16	0.19	0.22	0.43	0.27	0.42	0.34	0.46	0.49	4	6	6	7	5	5	4	4	6	11	8	10	8	13
82	Alpha-2-HS-glycoprotein OS=Homo sapiens GN=AHSG PE=1 SV=1	FETUA_HUMAN	39	5.52	Homo sapiens	13	17	17	11	13	12	12	14	12	19	21	17	22	20	25	0.24	0.29	0.28	0.24	0.25	0.23	0.25	0.26	0.22	0.34	0.33	0.32	0.34	0.34	0.27	7	11	9	7	7	7	7	8	7	9	9	8	10	9
83	Fermitin family homolog 3 OS=Homo sapiens GN=FERMT3 PE=1 SV=1	URP2_HUMAN	76	6.98	Homo sapiens	14	16	17	15	11	10	16	19	15	0	0	0	0	0	0	0.33	0.34	0.35	0.29	0.23	0.25	0.32	0.37	0.34	0	0	0	0	0	0	14	15	16	14	11	10	14	17	14	0	0	0	0	0
84	Hemoglobin subunit alpha OS=Homo sapiens GN=HBA1 PE=1 SV=2	HBA_HUMAN	15	9.09	Homo sapiens	10	10	10	9	7	9	13	9	10	9	6	9	10	13	15	0.57	0.57	0.63	0.36	0.51	0.57	0.58	0.61	0.57	0.7	0.56	0.79	0.77	0.85	0.85	6	6	7	4	4	6	7	6	6	6	5	7	6	8
85	Complement component C8 beta chain OS=Homo sapiens GN=C8B PE=1 SV=3	CO8B_HUMAN	67	8.17	Homo sapiens	9	8	10	7	4	5	5	4	5	29	24	26	27	29	27	0.18	0.18	0.2	0.16	0.086	0.12	0.1	0.09	0.12	0.41	0.36	0.47	0.44	0.37	0.45	8	7	9	6	3	4	4	3	5	21	18	19	19	19
86	Tropomyosin alpha-4 chain OS=Homo sapiens GN=TPM4 PE=1 SV=3	TPM4_HUMAN	29	4.36	Homo sapiens	16	16	18	19	17	16	16	14	18	0	0	0	0	0	0	0.45	0.43	0.49	0.51	0.52	0.43	0.48	0.42	0.48	0	0	0	0	0	0	13	12	14	14	14	11	14	12	13	0	0	0	0	0
87	Apolipoprotein C-II OS=Homo sapiens GN=APOC2 PE=1 SV=1	APOC2_HUMAN	11	4.36	Homo sapiens	9	9	9	6	9	10	9	7	11	7	7	4	8	7	9	0.36	0.59	0.59	0.36	0.59	0.59	0.36	0.31	0.59	0.5	0.46	0.3	0.56	0.5	0.39	6	6	7	4	7	7	5	4	7	4	4	2	5	5
88	Serum amyloid A-4 protein OS=Homo sapiens GN=SAA4 PE=1 SV=2	SAA4_HUMAN	15	9.38	Homo sapiens	3	0	3	3	2	2	3	3	3	11	8	7	8	7	5	0.18	0	0.33	0.2	0.2	0.2	0.33	0.27	0.23	0.35	0.27	0.33	0.27	0.35	0.27	3	0	3	2	2	2	3	3	3	4	3	4	3	4
89	Spectrin alpha chain, erythrocytic 1 OS=Homo sapiens GN=SPTA1 PE=1 SV=5	SPTA1_HUMAN	280	4.69	Homo sapiens	3	3	4	0	4	5	0	5	4	0	0	0	0	0	0	0.016	0.014	0.019	0	0.024	0.031	0	0.031	0.024	0	0	0	0	0	0	3	3	4	0	4	5	0	5	4	0	0	0	0	0
90	14-3-3 protein zeta/delta OS=Homo sapiens GN=YWHAZ PE=1 SV=1	1433Z_HUMAN	28	4.43	Homo sapiens	15	22	19	17	15	15	16	14	20	0	0	0	0	0	0	0.51	0.67	0.54	0.51	0.47	0.47	0.58	0.62	0.66	0	0	0	0	0	0	14	18	17	15	13	13	12	14	16	0	0	0	0	0
91	Tubulin beta chain OS=Homo sapiens GN=TUBB PE=1 SV=2	TBB5_HUMAN	50	4.52	Homo sapiens	26	26	26	20	20	14	26	20	23	0	0	0	0	0	0	0.49	0.43	0.52	0.36	0.38	0.31	0.49	0.44	0.4	0	0	0	0	0	0	15	15	15	14	13	10	16	14	14	0	0	0	0	0
92	Complement component C6 OS=Homo sapiens GN=C6 PE=1 SV=3	CO6_HUMAN	105	6.74	Homo sapiens	6	4	4	4	3	5	3	4	2	26	26	30	32	22	25	0.09	0.065	0.049	0.072	0.037	0.075	0.049	0.049	0.027	0.29	0.28	0.29	0.32	0.26	0.3	6	4	4	4	3	5	3	4	2	21	23	24	26	18
93	Tubulin alpha-1B chain OS=Homo sapiens GN=TUBA1B PE=1 SV=1	TBA1B_HUMAN	50	4.7	Homo sapiens	13	16	22	16	14	17	19	15	16	0	0	0	0	0	0	0.3	0.45	0.53	0.35	0.34	0.35	0.47	0.39	0.41	0	0	0	0	0	0	11	13	18	10	10	14	15	13	12	0	0	0	0	0
94	Vitamin K-dependent protein S OS=Homo sapiens GN=PROS1 PE=1 SV=1	PROS_HUMAN	75	5.37	Homo sapiens	10	11	12	8	10	9	6	6	8	14	10	9	16	15	19	0.19	0.22	0.2	0.2	0.17	0.21	0.13	0.14	0.19	0.2	0.19	0.16	0.21	0.22	0.25	10	10	11	8	8	8	5	6	8	11	9	9	12	12
95	Glyceraldehyde-3-phosphate dehydrogenase OS=Homo sapiens GN=GAPDH PE=1 SV=3	G3P_HUMAN	36	8.73	Homo sapiens	13	15	14	18	10	10	14	15	13	3	2	2	3	3	3	0.37	0.41	0.46	0.57	0.42	0.41	0.48	0.48	0.41	0.1	0.066	0.066	0.1	0.12	0.12	9	11	10	13	9	8	11	11	10	3	2	2	3	3
96	Ficolin-3 OS=Homo sapiens GN=FCN3 PE=1 SV=2	FCN3_HUMAN	33	6.66	Homo sapiens	0	0	0	0	0	0	0	0	0	0	0	0	0	2	0	0	0	0	0	0	0	0	0	0	0	0	0	0	0.077	0	0	0	0	0	0	0	0	0	0	0	0	0	0	2
97	Ig lambda-2 chain C regions OS=Homo sapiens GN=IGLC2 PE=1 SV=1	LAC2_HUMAN	11	7.34	Homo sapiens	0	0	0	17	15	22	15	12	12	16	12	15	17	18	20	0	0	0	0.96	0.89	0.93	0.89	0.89	0.93	0.75	0.6	0.75	0.75	0.75	0.75	0	0	0	3	3	4	3	3	3	2	2	2	2	2
98	Latent-transforming growth factor beta-binding protein 1 OS=Homo sapiens GN=LTBP1 PE=1 SV=4	LTBP1_HUMAN	187	5.85	Homo sapiens	22	22	33	25	16	21	27	22	26	0	0	0	0	0	0	0.18	0.16	0.21	0.2	0.13	0.16	0.2	0.17	0.17	0	0	0	0	0	0	20	20	26	22	15	18	24	21	22	0	0	0	0	0
99	Alpha-1-antichymotrypsin OS=Homo sapiens GN=SERPINA3 PE=1 SV=2	AACT_HUMAN	48	5.19	Homo sapiens	6	6	7	5	3	3	4	3	5	11	12	10	15	17	16	0.16	0.14	0.2	0.12	0.092	0.092	0.13	0.11	0.14	0.32	0.3	0.31	0.39	0.37	0.39	6	6	7	5	3	3	4	3	4	10	11	10	13	12
100	Apolipoprotein L1 OS=Homo sapiens GN=APOL1 PE=1 SV=5	APOL1_HUMAN	44	5.55	Homo sapiens	6	9	7	5	4	6	6	5	5	11	9	12	12	11	15	0.18	0.2	0.17	0.15	0.13	0.24	0.15	0.15	0.15	0.23	0.21	0.28	0.28	0.31	0.42	6	9	7	5	4	6	6	4	4	9	7	9	10	9
101	Pyruvate kinase PKM OS=Homo sapiens GN=PKM PE=1 SV=4	KPYM_HUMAN	58	7.94	Homo sapiens	12	12	15	14	15	14	5	9	10	0	0	0	0	0	0	0.27	0.27	0.3	0.35	0.38	0.34	0.11	0.24	0.24	0	0	0	0	0	0	12	12	15	13	15	13	5	9	10	0	0	0	0	0
102	Integrin-linked protein kinase OS=Homo sapiens GN=ILK PE=1 SV=2	ILK_HUMAN	51	8.18	Homo sapiens	8	11	11	12	14	11	9	10	8	0	0	0	0	0	0	0.22	0.3	0.33	0.33	0.35	0.31	0.26	0.3	0.22	0	0	0	0	0	0	8	11	11	12	13	11	9	10	8	0	0	0	0	0
103	Spectrin beta chain, erythrocytic OS=Homo sapiens GN=SPTB PE=1 SV=5	SPTB1_HUMAN	246	4.92	Homo sapiens	7	5	5	4	3	4	5	5	4	0	0	0	0	0	0	0.043	0.031	0.04	0.027	0.019	0.025	0.032	0.029	0.029	0	0	0	0	0	0	7	5	5	4	3	4	5	4	4	0	0	0	0	0
104	Myosin light polypeptide 6 OS=Homo sapiens GN=MYL6 PE=1 SV=2	MYL6_HUMAN	17	4.29	Homo sapiens	14	14	16	20	18	20	12	12	16	0	0	0	0	0	0	0.58	0.62	0.62	0.73	0.65	0.65	0.56	0.62	0.62	0	0	0	0	0	0	8	9	9	11	10	10	8	8	9	0	0	0	0	0
105	Coagulation factor XIII A chain OS=Homo sapiens GN=F13A1 PE=1 SV=4	F13A_HUMAN	83	5.95	Homo sapiens	10	14	13	12	14	10	10	11	9	6	8	11	7	10	12	0.15	0.25	0.22	0.19	0.21	0.14	0.14	0.18	0.14	0.1	0.16	0.19	0.11	0.18	0.19	9	12	11	11	13	10	10	10	8	5	8	10	6	10
106	Apolipoprotein C-I OS=Homo sapiens GN=APOC1 PE=1 SV=1	APOC1_HUMAN	9	9.17	Homo sapiens	2	5	5	0	2	2	0	0	0	7	6	7	5	7	7	0.27	0.4	0.29	0	0.27	0.27	0	0	0	0.4	0.4	0.4	0.27	0.4	0.4	2	5	4	0	2	2	0	0	0	5	4	4	3	4
107	Keratin, type II cytoskeletal 5 OS=Homo sapiens GN=KRT5 PE=1 SV=3	K2C5_HUMAN	62	7.91	Homo sapiens	15	11	12	10	11	10	13	8	10	27	28	28	29	15	17	0.21	0.18	0.19	0.17	0.18	0.17	0.21	0.12	0.17	0.39	0.36	0.36	0.34	0.2	0.24	6	8	7	5	7	7	7	5	5	14	13	14	12	7
108	Keratin, type I cytoskeletal 14 OS=Homo sapiens GN=KRT14 PE=1 SV=4	K1C14_HUMAN	52	4.81	Homo sapiens	15	11	14	12	10	11	12	13	10	31	27	29	28	20	22	0.23	0.17	0.23	0.23	0.21	0.23	0.21	0.24	0.22	0.49	0.43	0.48	0.44	0.39	0.36	4	2	4	5	4	4	3	4	3	9	8	9	7	6
109	Protein AMBP OS=Homo sapiens GN=AMBP PE=1 SV=1	AMBP_HUMAN	39	6.15	Homo sapiens	7	11	9	9	8	10	8	7	9	10	14	17	13	14	20	0.23	0.28	0.27	0.23	0.23	0.28	0.23	0.22	0.29	0.28	0.32	0.43	0.37	0.31	0.43	7	10	8	8	7	8	7	6	8	8	10	12	10	8
110	Plasma protease C1 inhibitor OS=Homo sapiens GN=SERPING1 PE=1 SV=2	IC1_HUMAN	55	6.52	Homo sapiens	0	2	2	0	2	0	2	0	0	11	11	15	15	21	26	0	0.044	0.036	0	0.036	0	0.036	0	0	0.27	0.19	0.27	0.23	0.34	0.33	0	2	2	0	2	0	2	0	0	10	8	11	11	13
111	Alpha-1-acid glycoprotein 1 OS=Homo sapiens GN=ORM1 PE=1 SV=1	A1AG1_HUMAN	24	4.66	Homo sapiens	5	4	5	5	4	4	0	5	3	7	10	8	13	13	14	0.16	0.16	0.17	0.17	0.17	0.23	0	0.17	0.12	0.28	0.34	0.3	0.34	0.35	0.41	3	3	4	4	3	4	0	4	2	5	7	5	8	7
112	Pleckstrin OS=Homo sapiens GN=PLEK PE=1 SV=3	PLEK_HUMAN	40	8.45	Homo sapiens	10	13	14	10	8	14	9	10	10	0	0	0	0	0	0	0.28	0.43	0.44	0.4	0.25	0.51	0.3	0.38	0.44	0	0	0	0	0	0	8	9	10	8	6	10	7	8	8	0	0	0	0	0
113	Ankyrin-1 OS=Homo sapiens GN=ANK1 PE=1 SV=3	ANK1_HUMAN	206	5.92	Homo sapiens	3	2	5	2	0	4	5	2	4	0	0	0	0	0	0	0.027	0.014	0.042	0.016	0	0.039	0.043	0.021	0.033	0	0	0	0	0	0	3	2	5	2	0	4	5	2	4	0	0	0	0	0
114	Antithrombin-III OS=Homo sapiens GN=SERPINC1 PE=1 SV=1	ANT3_HUMAN	53	6.68	Homo sapiens	6	6	8	5	3	5	4	5	4	12	11	13	17	16	22	0.17	0.19	0.2	0.13	0.11	0.13	0.11	0.17	0.14	0.3	0.2	0.37	0.35	0.32	0.45	6	6	8	5	3	5	4	5	4	11	9	12	14	13
115	Complement component C8 alpha chain OS=Homo sapiens GN=C8A PE=1 SV=2	CO8A_HUMAN	65	6.41	Homo sapiens	2	3	2	2	3	0	0	2	2	16	17	17	19	14	15	0.034	0.082	0.051	0.051	0.068	0	0	0.046	0.046	0.32	0.28	0.28	0.28	0.25	0.29	2	3	2	2	3	0	0	2	2	14	14	13	14	11
116	Complement component C7 OS=Homo sapiens GN=C7 PE=1 SV=2	CO7_HUMAN	94	6.44	Homo sapiens	5	6	5	4	0	0	0	0	2	24	27	24	25	20	22	0.083	0.11	0.076	0.063	0	0	0	0	0.024	0.36	0.33	0.35	0.3	0.3	0.31	5	6	5	4	0	0	0	0	2	21	21	21	19	18
117	HLA class I histocompatibility antigen, A-2 alpha chain OS=Homo sapiens GN=HLA-A PE=1 SV=1	1A02_HUMAN	41	7	Homo sapiens	10	11	9	13	9	12	9	10	11	0	0	0	0	0	0	0.29	0.35	0.3	0.38	0.28	0.33	0.24	0.32	0.32	0	0	0	0	0	0	7	8	7	9	7	8	6	8	8	0	0	0	0	0
118	Alpha-1B-glycoprotein OS=Homo sapiens GN=A1BG PE=1 SV=4	A1BG_HUMAN	54	5.71	Homo sapiens	5	5	6	2	5	4	3	0	0	9	10	11	12	13	15	0.15	0.16	0.17	0.059	0.12	0.11	0.083	0	0	0.22	0.23	0.27	0.28	0.26	0.26	5	5	6	2	5	4	3	0	0	8	8	9	10	9
119	Plasma kallikrein OS=Homo sapiens GN=KLKB1 PE=1 SV=1	KLKB1_HUMAN	71	8.26	Homo sapiens	6	8	8	13	6	11	10	11	11	10	9	8	11	12	13	0.11	0.15	0.17	0.25	0.16	0.23	0.2	0.25	0.23	0.19	0.18	0.15	0.2	0.26	0.24	6	7	8	12	6	10	9	10	10	10	9	8	10	12
120	Integrin beta-1 OS=Homo sapiens GN=ITGB1 PE=1 SV=2	ITB1_HUMAN	88	5.04	Homo sapiens	11	10	11	11	12	11	10	9	11	0	0	0	0	0	0	0.16	0.16	0.16	0.17	0.19	0.16	0.15	0.16	0.15	0	0	0	0	0	0	10	9	10	10	12	10	9	9	10	0	0	0	0	0
121	Lactotransferrin OS=Homo sapiens GN=LTF PE=1 SV=6	TRFL_HUMAN	78	8.17	Homo sapiens	0	0	0	0	0	0	0	0	0	0	0	0	0	0	0	0	0	0	0	0	0	0	0	0	0	0	0	0	0	0	0	0	0	0	0	0	0	0	0	0	0	0	0	0
122	Serum amyloid A-2 protein OS=Homo sapiens GN=SAA2 PE=1 SV=1	SAA2_HUMAN	14	9.48	Homo sapiens	0	0	0	0	0	0	0	0	0	2	3	3	0	3	3	0	0	0	0	0	0	0	0	0	0.24	0.31	0.36	0	0.23	0.23	0	0	0	0	0	0	0	0	0	2	3	3	0	3
123	Haptoglobin-related protein OS=Homo sapiens GN=HPR PE=2 SV=2	HPTR_HUMAN	39	7.11	Homo sapiens	12	15	15	11	12	12	13	10	11	34	29	31	34	42	42	0.3	0.41	0.36	0.23	0.36	0.3	0.32	0.37	0.42	0.66	0.47	0.5	0.54	0.58	0.63	3	5	4	2	5	3	5	4	5	8	5	7	7	7
124	Sarcoplasmic/endoplasmic reticulum calcium ATPase 3 OS=Homo sapiens GN=ATP2A3 PE=1 SV=2	AT2A3_HUMAN	114	5.26	Homo sapiens	13	13	16	13	10	12	13	10	15	0	0	0	0	0	0	0.16	0.18	0.18	0.16	0.16	0.17	0.16	0.13	0.16	0	0	0	0	0	0	11	12	13	11	10	11	12	10	13	0	0	0	0	0
125	Heat shock cognate 71 kDa protein OS=Homo sapiens GN=HSPA8 PE=1 SV=1	HSP7C_HUMAN	71	5.16	Homo sapiens	10	10	13	14	12	12	15	13	16	0	0	0	0	0	0	0.2	0.18	0.24	0.24	0.25	0.23	0.24	0.26	0.3	0	0	0	0	0	0	9	8	11	13	12	10	12	11	14	0	0	0	0	0
126	ATP synthase subunit beta, mitochondrial OS=Homo sapiens GN=ATP5B PE=1 SV=3	ATPB_HUMAN	57	5.07	Homo sapiens	12	12	13	13	11	10	13	11	13	3	3	3	3	2	2	0.31	0.3	0.3	0.28	0.29	0.27	0.3	0.27	0.34	0.072	0.072	0.072	0.072	0.047	0.047	10	11	10	10	10	9	11	9	12	3	3	3	3	2
127	Fibulin-1 OS=Homo sapiens GN=FBLN1 PE=1 SV=4	FBLN1_HUMAN	77	4.86	Homo sapiens	7	9	11	11	7	8	6	5	2	12	8	15	14	13	13	0.1	0.17	0.2	0.21	0.14	0.16	0.13	0.1	0.031	0.19	0.17	0.3	0.26	0.27	0.29	7	9	10	10	6	8	6	5	2	10	8	14	12	11
128	Coagulation factor XI OS=Homo sapiens GN=F11 PE=1 SV=1	FA11_HUMAN	70	8.14	Homo sapiens	5	12	12	13	12	11	12	7	9	0	0	0	0	0	0	0.11	0.25	0.28	0.29	0.26	0.22	0.22	0.14	0.2	0	0	0	0	0	0	5	11	12	12	11	9	11	6	9	0	0	0	0	0
129	Isocitrate dehydrogenase [NADP], mitochondrial OS=Homo sapiens GN=IDH2 PE=1 SV=2	IDHP_HUMAN	51	8.95	Homo sapiens	12	15	13	8	9	11	11	10	11	0	0	0	0	0	0	0.33	0.37	0.34	0.25	0.24	0.32	0.32	0.24	0.29	0	0	0	0	0	0	12	14	12	8	8	11	10	10	10	0	0	0	0	0
130	Ras-related protein Rap-1b OS=Homo sapiens GN=RAP1B PE=1 SV=1	RAP1B_HUMAN	21	5.39	Homo sapiens	11	11	14	12	10	8	7	8	11	0	0	0	0	0	0	0.38	0.46	0.56	0.49	0.41	0.29	0.46	0.24	0.41	0	0	0	0	0	0	8	9	12	10	9	6	7	6	8	0	0	0	0	0
131	60 kDa heat shock protein, mitochondrial OS=Homo sapiens GN=HSPD1 PE=1 SV=2	CH60_HUMAN	61	5.55	Homo sapiens	15	11	13	14	16	14	14	10	12	0	0	0	0	0	0	0.25	0.21	0.22	0.28	0.3	0.27	0.28	0.22	0.19	0	0	0	0	0	0	13	10	10	12	14	13	12	9	10	0	0	0	0	0
132	Platelet basic protein OS=Homo sapiens GN=PPBP PE=1 SV=3	CXCL7_HUMAN	14	9.07	Homo sapiens	7	9	7	12	8	9	8	8	7	0	0	0	0	0	0	0.33	0.33	0.3	0.41	0.33	0.4	0.32	0.38	0.38	0	0	0	0	0	0	4	5	3	7	5	5	4	4	4	0	0	0	0	0
133	Immunoglobulin J chain OS=Homo sapiens GN=IGJ PE=1 SV=4	IGJ_HUMAN	18	4.87	Homo sapiens	6	4	6	3	3	3	5	6	4	5	6	4	6	3	5	0.25	0.23	0.25	0.17	0.094	0.17	0.19	0.26	0.19	0.19	0.24	0.14	0.29	0.14	0.28	4	3	5	2	2	2	3	4	3	4	5	3	5	3
134	Fructose-bisphosphate aldolase A OS=Homo sapiens GN=ALDOA PE=1 SV=2	ALDOA_HUMAN	39	8.2	Homo sapiens	10	7	8	6	9	10	8	11	9	0	0	0	0	0	0	0.35	0.18	0.3	0.18	0.26	0.26	0.27	0.35	0.23	0	0	0	0	0	0	8	6	8	6	8	9	8	10	9	0	0	0	0	0
135	78 kDa glucose-regulated protein OS=Homo sapiens GN=HSPA5 PE=1 SV=2	GRP78_HUMAN	72	4.8	Homo sapiens	10	9	12	8	11	5	7	11	10	0	0	0	0	0	0	0.17	0.15	0.18	0.16	0.22	0.095	0.14	0.2	0.19	0	0	0	0	0	0	10	8	12	8	10	5	7	10	9	0	0	0	0	0
136	Ig kappa chain V-III region HAH OS=Homo sapiens PE=2 SV=1	KV312_HUMAN (+1)	14	8.18	Homo sapiens	4	5	5	4	7	4	6	4	5	4	6	5	3	5	5	0.52	0.41	0.44	0.53	0.6	0.53	0.65	0.34	0.65	0.43	0.5	0.5	0.19	0.5	0.5	4	4	5	4	6	4	6	4	5	3	4	4	2	4
137	Cofilin-1 OS=Homo sapiens GN=CFL1 PE=1 SV=3	COF1_HUMAN	19	8.29	Homo sapiens	9	8	8	8	5	6	6	4	10	0	0	0	0	0	0	0.56	0.63	0.53	0.63	0.46	0.43	0.39	0.33	0.55	0	0	0	0	0	0	8	8	7	8	5	6	6	4	10	0	0	0	0	0
138	Pigment epithelium-derived factor OS=Homo sapiens GN=SERPINF1 PE=1 SV=4	PEDF_HUMAN	46	6.33	Homo sapiens	4	4	4	0	3	3	3	3	3	4	3	3	3	6	5	0.11	0.11	0.11	0	0.086	0.081	0.081	0.081	0.081	0.11	0.089	0.091	0.079	0.15	0.15	4	4	4	0	3	3	3	3	3	4	3	3	3	5
139	Platelet endothelial cell adhesion molecule OS=Homo sapiens GN=PECAM1 PE=1 SV=1	PECA1_HUMAN	83	6.99	Homo sapiens	8	8	9	9	10	8	6	9	11	0	0	0	0	0	0	0.18	0.15	0.19	0.19	0.21	0.19	0.13	0.21	0.24	0	0	0	0	0	0	8	8	9	9	10	8	6	9	11	0	0	0	0	0
140	Hyaluronan-binding protein 2 OS=Homo sapiens GN=HABP2 PE=1 SV=1	HABP2_HUMAN	63	6.52	Homo sapiens	3	3	4	3	4	5	2	2	4	2	2	0	2	4	3	0.068	0.068	0.071	0.05	0.068	0.071	0.05	0.05	0.084	0.029	0.05	0	0.041	0.091	0.073	3	3	4	2	3	4	2	2	4	2	2	0	2	4
141	ATP synthase subunit alpha, mitochondrial OS=Homo sapiens GN=ATP5A1 PE=1 SV=1	ATPA_HUMAN	60	9.56	Homo sapiens	14	10	10	7	9	9	8	11	9	2	3	2	2	0	2	0.29	0.2	0.22	0.16	0.18	0.16	0.18	0.21	0.21	0.036	0.036	0.036	0.036	0	0.025	13	9	9	6	8	8	7	10	9	2	2	2	2	0
142	Clathrin heavy chain 1 OS=Homo sapiens GN=CLTC PE=1 SV=5	CLH1_HUMAN	192	5.42	Homo sapiens	11	12	13	8	7	13	6	5	7	0	0	0	0	0	0	0.088	0.1	0.11	0.063	0.057	0.1	0.043	0.039	0.052	0	0	0	0	0	0	11	12	13	8	7	13	6	5	7	0	0	0	0	0
143	Ig heavy chain V-III region 23 OS=Homo sapiens GN=IGHV3-23 PE=1 SV=2	HV303_HUMAN	13	8.46	Homo sapiens	3	4	3	4	5	5	3	3	2	3	2	4	9	5	5	0.19	0.35	0.26	0.35	0.35	0.35	0.19	0.35	0.19	0.26	0.19	0.35	0.35	0.32	0.19	2	3	2	3	3	3	2	3	2	2	2	3	4	3
144	WD repeat-containing protein 1 OS=Homo sapiens GN=WDR1 PE=1 SV=4	WDR1_HUMAN	66	6.64	Homo sapiens	3	7	3	4	5	4	4	4	6	0	0	0	0	0	0	0.089	0.12	0.066	0.12	0.11	0.097	0.11	0.12	0.2	0	0	0	0	0	0	3	6	3	4	5	4	4	4	6	0	0	0	0	0
145	Apolipoprotein M OS=Homo sapiens GN=APOM PE=1 SV=2	APOM_HUMAN	21	5.92	Homo sapiens	0	0	0	0	0	0	0	0	0	3	4	7	6	4	4	0	0	0	0	0	0	0	0	0	0.074	0.16	0.35	0.3	0.16	0.11	0	0	0	0	0	0	0	0	0	2	4	6	5	4
146	Platelet glycoprotein 4 OS=Homo sapiens GN=CD36 PE=1 SV=2	CD36_HUMAN	53	8.06	Homo sapiens	8	8	9	6	4	7	3	6	7	0	0	0	0	0	0	0.14	0.12	0.18	0.13	0.072	0.18	0.042	0.11	0.15	0	0	0	0	0	0	8	7	9	5	3	6	2	5	6	0	0	0	0	0
147	Proteoglycan 4 OS=Homo sapiens GN=PRG4 PE=1 SV=2	PRG4_HUMAN	151	10.16	Homo sapiens	7	6	11	7	9	5	7	6	5	6	7	6	10	8	8	0.071	0.051	0.08	0.059	0.083	0.049	0.063	0.064	0.051	0.055	0.04	0.04	0.056	0.061	0.076	7	6	9	7	9	5	7	6	5	6	5	5	8	6
148	Guanine nucleotide-binding protein G(i) subunit alpha-2 OS=Homo sapiens GN=GNAI2 PE=1 SV=3	GNAI2_HUMAN	40	5.2	Homo sapiens	5	7	5	5	4	4	3	3	4	0	0	0	0	0	0	0.14	0.29	0.21	0.19	0.11	0.12	0.099	0.11	0.15	0	0	0	0	0	0	5	7	5	5	4	4	3	3	4	0	0	0	0	0
149	Histone H4 OS=Homo sapiens GN=HIST1H4A PE=1 SV=2	H4_HUMAN	11	11.91	Homo sapiens	2	2	4	2	2	2	0	2	3	0	0	0	0	0	0	0.21	0.19	0.39	0.17	0.17	0.22	0	0.17	0.3	0	0	0	0	0	0	2	2	4	2	2	2	0	2	3	0	0	0	0	0
150	Profilin-1 OS=Homo sapiens GN=PFN1 PE=1 SV=2	PROF1_HUMAN	15	8.46	Homo sapiens	8	10	9	8	7	8	4	4	5	0	0	0	0	0	0	0.32	0.44	0.51	0.49	0.36	0.42	0.18	0.31	0.41	0	0	0	0	0	0	6	8	8	7	6	7	3	4	5	0	0	0	0	0
151	Protein disulfide-isomerase A3 OS=Homo sapiens GN=PDIA3 PE=1 SV=4	PDIA3_HUMAN	57	6.28	Homo sapiens	5	11	4	6	6	5	2	3	8	0	0	0	0	0	0	0.093	0.16	0.053	0.093	0.095	0.071	0.051	0.083	0.17	0	0	0	0	0	0	5	10	4	6	6	5	2	3	8	0	0	0	0	0
152	Protein Z-dependent protease inhibitor OS=Homo sapiens GN=SERPINA10 PE=1 SV=1	ZPI_HUMAN	51	8.58	Homo sapiens	5	5	3	6	6	6	4	6	5	5	3	5	5	5	3	0.13	0.13	0.077	0.12	0.15	0.15	0.11	0.14	0.12	0.16	0.074	0.13	0.13	0.15	0.11	5	5	3	5	6	6	4	6	5	5	3	5	5	5
153	Alpha-2-antiplasmin OS=Homo sapiens GN=SERPINF2 PE=1 SV=3	A2AP_HUMAN	55	6.24	Homo sapiens	2	2	0	0	0	0	2	2	0	13	9	13	14	15	14	0.081	0.065	0	0	0	0	0.065	0.065	0	0.3	0.2	0.3	0.3	0.35	0.39	2	2	0	0	0	0	2	2	0	9	7	10	10	10
154	Adenylyl cyclase-associated protein 1 OS=Homo sapiens GN=CAP1 PE=1 SV=5	CAP1_HUMAN	52	8.2	Homo sapiens	9	10	9	8	11	8	8	7	8	0	0	0	0	0	0	0.23	0.24	0.24	0.21	0.27	0.19	0.18	0.17	0.19	0	0	0	0	0	0	8	9	8	7	9	7	6	6	7	0	0	0	0	0
155	Platelet glycoprotein IX OS=Homo sapiens GN=GP9 PE=1 SV=3	GPIX_HUMAN	19	6.32	Homo sapiens	7	7	7	7	7	7	7	5	5	0	0	0	0	0	0	0.31	0.31	0.31	0.31	0.31	0.31	0.31	0.31	0.31	0	0	0	0	0	0	4	4	4	4	4	4	4	4	4	0	0	0	0	0
156	Moesin OS=Homo sapiens GN=MSN PE=1 SV=3	MOES_HUMAN	68	6.32	Homo sapiens	9	13	12	5	7	7	7	6	8	0	0	0	0	0	0	0.17	0.24	0.23	0.094	0.13	0.14	0.13	0.13	0.16	0	0	0	0	0	0	9	13	12	5	7	7	7	6	8	0	0	0	0	0
157	Zyxin OS=Homo sapiens GN=ZYX PE=1 SV=1	ZYX_HUMAN	61	6.65	Homo sapiens	11	9	11	7	10	9	9	10	8	0	0	0	0	0	0	0.27	0.24	0.22	0.18	0.23	0.22	0.24	0.3	0.24	0	0	0	0	0	0	9	8	8	6	8	8	8	9	8	0	0	0	0	0
158	LIM and senescent cell antigen-like-containing domain protein 1 OS=Homo sapiens GN=LIMS1 PE=1 SV=4	LIMS1_HUMAN	37	8.08	Homo sapiens	8	9	6	4	6	6	6	5	7	0	0	0	0	0	0	0.28	0.38	0.31	0.24	0.27	0.27	0.24	0.15	0.26	0	0	0	0	0	0	6	9	6	4	6	6	5	4	7	0	0	0	0	0
159	Protein S100-A9 OS=Homo sapiens GN=S100A9 PE=1 SV=1	S10A9_HUMAN	13	6.07	Homo sapiens	0	2	2	3	4	3	0	0	0	4	7	3	4	0	0	0	0.25	0.25	0.35	0.29	0.28	0	0	0	0.45	0.52	0.38	0.45	0	0	0	2	2	3	4	2	0	0	0	4	6	3	4	0
160	Keratin, type II cytoskeletal 4 OS=Homo sapiens GN=KRT4 PE=1 SV=4	K2C4_HUMAN	57	6.55	Homo sapiens	0	0	0	0	0	0	5	5	4	30	29	27	29	9	11	0	0	0	0	0	0	0.082	0.062	0.066	0.48	0.41	0.42	0.44	0.17	0.22	0	0	0	0	0	0	2	2	3	22	20	20	21	7
161	Coronin-1C OS=Homo sapiens GN=CORO1C PE=1 SV=1	COR1C_HUMAN	53	7.09	Homo sapiens	9	8	9	8	9	10	5	6	9	0	0	0	0	0	0	0.22	0.18	0.19	0.19	0.2	0.27	0.11	0.12	0.19	0	0	0	0	0	0	8	7	8	8	8	10	5	5	9	0	0	0	0	0
162	Keratin, type I cytoskeletal 13 OS=Homo sapiens GN=KRT13 PE=1 SV=4	K1C13_HUMAN	50	4.61	Homo sapiens	0	0	0	0	0	0	0	0	0	29	24	24	28	14	20	0	0	0	0	0	0	0	0	0	0.5	0.41	0.44	0.45	0.28	0.32	0	0	0	0	0	0	0	0	0	15	12	13	13	7
163	Complement component C8 gamma chain OS=Homo sapiens GN=C8G PE=1 SV=3	CO8G_HUMAN	22	8.48	Homo sapiens	3	2	2	2	3	2	2	3	4	5	6	6	3	6	9	0.17	0.13	0.16	0.16	0.23	0.18	0.14	0.22	0.32	0.26	0.33	0.33	0.22	0.3	0.4	3	2	2	2	3	2	2	3	4	5	5	5	3	5
164	Coagulation factor XII OS=Homo sapiens GN=F12 PE=1 SV=3	FA12_HUMAN	68	7.76	Homo sapiens	3	6	3	5	5	5	3	2	4	0	2	2	2	5	7	0.065	0.099	0.076	0.15	0.089	0.12	0.075	0.047	0.091	0	0.044	0.033	0.044	0.11	0.14	3	5	3	5	4	5	3	2	4	0	2	2	2	5
165	Transthyretin OS=Homo sapiens GN=TTR PE=1 SV=1	TTHY_HUMAN	16	5.58	Homo sapiens	4	5	4	2	2	2	3	3	3	6	4	7	6	8	8	0.44	0.53	0.34	0.18	0.095	0.095	0.25	0.34	0.34	0.48	0.18	0.49	0.34	0.64	0.68	4	5	4	2	2	2	3	3	3	4	3	5	4	6
166	Integrin alpha-6 OS=Homo sapiens GN=ITGA6 PE=1 SV=5	ITA6_HUMAN	127	6.57	Homo sapiens	7	6	4	5	7	7	4	7	6	0	0	0	0	0	0	0.096	0.088	0.055	0.06	0.087	0.086	0.057	0.084	0.079	0	0	0	0	0	0	7	6	4	5	7	7	4	7	6	0	0	0	0	0
167	Vasodilator-stimulated phosphoprotein OS=Homo sapiens GN=VASP PE=1 SV=3	VASP_HUMAN	40	9.41	Homo sapiens	3	5	5	10	6	10	6	7	5	0	0	0	0	0	0	0.097	0.17	0.2	0.34	0.21	0.33	0.15	0.2	0.17	0	0	0	0	0	0	3	4	5	8	5	8	5	5	4	0	0	0	0	0
168	Desmoplakin OS=Homo sapiens GN=DSP PE=1 SV=3	DESP_HUMAN	332	6.78	Homo sapiens	0	0	0	0	0	0	0	0	0	4	8	5	5	0	0	0	0	0	0	0	0	0	0	0	0.014	0.028	0.017	0.017	0	0	0	0	0	0	0	0	0	0	0	4	8	5	5	0
169	Solute carrier family 2, facilitated glucose transporter member 3 OS=Homo sapiens GN=SLC2A3 PE=2 SV=1	GTR3_HUMAN	54	7.24	Homo sapiens	5	6	6	6	5	6	2	5	5	0	0	0	0	0	0	0.12	0.15	0.16	0.15	0.13	0.15	0.06	0.12	0.12	0	0	0	0	0	0	5	6	6	6	4	6	2	5	5	0	0	0	0	0
170	Peptidyl-prolyl cis-trans isomerase A OS=Homo sapiens GN=PPIA PE=1 SV=2	PPIA_HUMAN	18	7.97	Homo sapiens	7	5	4	7	5	6	7	3	10	0	0	0	0	0	0	0.6	0.51	0.4	0.55	0.48	0.42	0.67	0.24	0.74	0	0	0	0	0	0	6	5	4	7	5	4	7	3	8	0	0	0	0	0
171	Serum deprivation-response protein OS=Homo sapiens GN=SDPR PE=1 SV=3	SDPR_HUMAN	47	4.88	Homo sapiens	5	7	6	4	4	5	5	4	5	0	0	0	0	0	0	0.11	0.16	0.16	0.13	0.13	0.15	0.11	0.11	0.15	0	0	0	0	0	0	4	6	6	4	4	5	4	4	5	0	0	0	0	0
172	Alpha-enolase OS=Homo sapiens GN=ENO1 PE=1 SV=2	ENOA_HUMAN	47	7.46	Homo sapiens	5	6	5	4	2	4	2	4	7	0	0	0	0	0	0	0.18	0.2	0.16	0.15	0.062	0.12	0.062	0.15	0.24	0	0	0	0	0	0	5	6	5	4	2	4	2	4	7	0	0	0	0	0
173	Myosin regulatory light polypeptide 9 OS=Homo sapiens GN=MYL9 PE=1 SV=4	MYL9_HUMAN	20	4.54	Homo sapiens	7	8	8	6	6	6	5	6	7	0	0	0	0	0	0	0.35	0.52	0.52	0.35	0.47	0.47	0.36	0.3	0.36	0	0	0	0	0	0	4	6	6	4	5	5	4	3	4	0	0	0	0	0
174	Filaggrin-2 OS=Homo sapiens GN=FLG2 PE=1 SV=1	FILA2_HUMAN	248	8.35	Homo sapiens	4	4	5	0	2	0	0	6	3	0	5	5	6	0	0	0.025	0.028	0.036	0	0.015	0	0	0.038	0.026	0	0.023	0.028	0.032	0	0	4	4	5	0	2	0	0	5	3	0	3	4	5	0
175	Platelet glycoprotein Ib alpha chain OS=Homo sapiens GN=GP1BA PE=1 SV=2	GP1BA_HUMAN	72	6.24	Homo sapiens	7	6	7	8	8	8	4	5	3	0	0	0	0	0	0	0.14	0.095	0.13	0.17	0.13	0.17	0.077	0.077	0.06	0	0	0	0	0	0	7	6	7	8	8	8	4	5	3	0	0	0	0	0
176	Inter-alpha-trypsin inhibitor heavy chain H3 OS=Homo sapiens GN=ITIH3 PE=1 SV=2	ITIH3_HUMAN	100	5.49	Homo sapiens	3	4	4	5	6	4	2	4	5	5	8	6	6	12	9	0.036	0.054	0.054	0.071	0.091	0.056	0.029	0.062	0.076	0.052	0.092	0.09	0.072	0.14	0.067	3	4	4	5	6	4	2	4	5	4	7	6	4	10
177	EGF-containing fibulin-like extracellular matrix protein 1 OS=Homo sapiens GN=EFEMP1 PE=1 SV=2	FBLN3_HUMAN	55	4.7	Homo sapiens	4	3	6	3	5	4	0	2	2	12	12	9	11	9	13	0.099	0.081	0.18	0.12	0.16	0.13	0	0.049	0.049	0.28	0.3	0.24	0.3	0.26	0.3	4	3	6	3	5	4	0	2	2	9	10	9	10	8
178	Apolipoprotein F OS=Homo sapiens GN=APOF PE=1 SV=2	APOF_HUMAN	35	5.36	Homo sapiens	0	0	0	0	0	0	0	0	0	3	2	0	0	3	5	0	0	0	0	0	0	0	0	0	0.077	0.077	0	0	0.077	0.18	0	0	0	0	0	0	0	0	0	2	2	0	0	2
179	Carboxypeptidase N catalytic chain OS=Homo sapiens GN=CPN1 PE=1 SV=1	CBPN_HUMAN	52	7.36	Homo sapiens	0	2	2	2	3	3	4	3	2	4	4	3	4	3	5	0	0.041	0.041	0.041	0.063	0.063	0.13	0.063	0.041	0.1	0.092	0.096	0.15	0.09	0.15	0	2	2	2	3	3	4	3	2	4	4	3	4	3
180	Actin-related protein 3 OS=Homo sapiens GN=ACTR3 PE=1 SV=3	ARP3_HUMAN	47	5.69	Homo sapiens	6	5	6	5	5	6	7	4	7	0	0	0	0	0	0	0.16	0.16	0.18	0.14	0.19	0.19	0.21	0.12	0.24	0	0	0	0	0	0	6	5	6	5	5	5	6	4	7	0	0	0	0	0
181	P-selectin OS=Homo sapiens GN=SELP PE=1 SV=3	LYAM3_HUMAN	91	6.57	Homo sapiens	7	10	7	8	6	8	8	8	10	0	0	0	0	0	0	0.099	0.16	0.098	0.087	0.075	0.13	0.14	0.11	0.15	0	0	0	0	0	0	6	8	6	7	5	7	7	6	9	0	0	0	0	0
182	Apolipoprotein C-IV OS=Homo sapiens GN=APOC4 PE=1 SV=1	APOC4_HUMAN	15	9.13	Homo sapiens	0	0	0	0	0	0	0	0	0	5	9	4	5	8	11	0	0	0	0	0	0	0	0	0	0.18	0.35	0.16	0.23	0.28	0.35	0	0	0	0	0	0	0	0	0	2	4	2	3	3
183	Coagulation factor X OS=Homo sapiens GN=F10 PE=1 SV=2	FA10_HUMAN	55	5.74	Homo sapiens	0	2	0	0	2	2	0	2	2	0	0	0	2	3	3	0	0.078	0	0	0.078	0.078	0	0.078	0.078	0	0	0	0.072	0.11	0.11	0	2	0	0	2	2	0	2	2	0	0	0	2	3
184	Endoplasmin OS=Homo sapiens GN=HSP90B1 PE=1 SV=1	ENPL_HUMAN	92	4.48	Homo sapiens	9	8	7	9	8	10	8	4	5	0	0	0	0	0	0	0.16	0.12	0.13	0.13	0.13	0.19	0.11	0.065	0.071	0	0	0	0	0	0	9	8	7	9	8	10	7	4	5	0	0	0	0	0
185	Afamin OS=Homo sapiens GN=AFM PE=1 SV=1	AFAM_HUMAN	69	5.7	Homo sapiens	2	2	0	0	0	2	0	2	0	10	6	6	5	10	11	0.037	0.043	0	0	0	0.042	0	0.042	0	0.18	0.12	0.11	0.1	0.17	0.18	2	2	0	0	0	2	0	2	0	9	6	6	5	9
186	Serum amyloid P-component OS=Homo sapiens GN=APCS PE=1 SV=2	SAMP_HUMAN	25	6.52	Homo sapiens	2	0	0	2	0	0	0	2	2	7	5	6	7	7	6	0.1	0	0	0.1	0	0	0	0.1	0.1	0.21	0.22	0.25	0.25	0.21	0.25	2	0	0	2	0	0	0	2	2	5	5	6	6	5
187	Angiotensinogen OS=Homo sapiens GN=AGT PE=1 SV=1	ANGT_HUMAN	53	6.27	Homo sapiens	2	0	3	0	2	0	0	0	0	4	7	8	6	6	9	0.043	0	0.093	0	0.068	0	0	0	0	0.12	0.17	0.27	0.17	0.18	0.31	2	0	3	0	2	0	0	0	0	4	6	8	6	6
188	N-acetylmuramoyl-L-alanine amidase OS=Homo sapiens GN=PGLYRP2 PE=1 SV=1	PGRP2_HUMAN	62	7.59	Homo sapiens	4	5	8	3	5	4	5	2	3	8	9	9	6	9	12	0.099	0.14	0.22	0.087	0.14	0.12	0.15	0.064	0.099	0.24	0.23	0.24	0.16	0.23	0.27	3	5	7	3	5	4	5	2	3	8	7	8	6	7
189	Histone H2B type 1-C/E/F/G/I OS=Homo sapiens GN=HIST1H2BC PE=1 SV=4	H2B1C_HUMAN	14	11	Homo sapiens	0	3	0	3	2	2	3	2	0	0	0	0	0	0	0	0	0.23	0	0.29	0.21	0.21	0.29	0.21	0	0	0	0	0	0	0	0	3	0	3	2	2	3	2	0	0	0	0	0	0
190	L-lactate dehydrogenase B chain OS=Homo sapiens GN=LDHB PE=1 SV=2	LDHB_HUMAN	37	5.93	Homo sapiens	5	5	4	3	5	6	5	4	5	2	0	0	0	0	0	0.18	0.17	0.14	0.12	0.18	0.21	0.18	0.15	0.19	0.084	0	0	0	0	0	5	5	4	3	5	6	5	4	5	2	0	0	0	0
191	Alpha-1-acid glycoprotein 2 OS=Homo sapiens GN=ORM2 PE=1 SV=2	A1AG2_HUMAN	24	4.76	Homo sapiens	0	3	3	0	0	0	0	0	0	7	8	6	6	7	7	0	0.095	0.15	0	0	0	0	0	0	0.27	0.27	0.23	0.27	0.32	0.4	0	2	2	0	0	0	0	0	0	4	4	4	4	4
192	Syntaxin-binding protein 2 OS=Homo sapiens GN=STXBP2 PE=1 SV=2	STXB2_HUMAN	66	6.52	Homo sapiens	8	10	8	6	6	6	9	7	9	0	0	0	0	0	0	0.2	0.23	0.19	0.15	0.12	0.18	0.19	0.14	0.2	0	0	0	0	0	0	8	10	8	6	6	6	9	7	9	0	0	0	0	0
193	Ras-related protein Rab-27B OS=Homo sapiens GN=RAB27B PE=1 SV=4	RB27B_HUMAN	25	5.13	Homo sapiens	5	5	5	3	3	5	3	4	3	0	0	0	0	0	0	0.22	0.26	0.22	0.17	0.17	0.26	0.17	0.22	0.17	0	0	0	0	0	0	4	5	4	3	3	5	3	4	3	0	0	0	0	0
194	Coagulation factor IX OS=Homo sapiens GN=F9 PE=1 SV=2	FA9_HUMAN	52	5.16	Homo sapiens	0	0	0	0	0	0	0	0	0	0	0	0	0	2	3	0	0	0	0	0	0	0	0	0	0	0	0	0	0.052	0.074	0	0	0	0	0	0	0	0	0	0	0	0	0	2
195	HLA class I histocompatibility antigen, B-40 alpha chain OS=Homo sapiens GN=HLA-B PE=1 SV=1	1B40_HUMAN	41	6.51	Homo sapiens	7	11	9	10	9	11	7	8	8	0	0	0	0	0	0	0.2	0.33	0.25	0.25	0.3	0.32	0.18	0.22	0.2	0	0	0	0	0	0	3	6	5	5	6	5	3	4	4	0	0	0	0	0
196	14-3-3 protein gamma OS=Homo sapiens GN=YWHAG PE=1 SV=2	1433G_HUMAN	28	4.52	Homo sapiens	6	4	6	4	4	3	4	3	4	0	0	0	0	0	0	0.24	0.17	0.21	0.14	0.14	0.1	0.17	0.15	0.2	0	0	0	0	0	0	5	4	5	4	4	3	4	2	3	0	0	0	0	0
197	Insulin-like growth factor-binding protein complex acid labile subunit OS=Homo sapiens GN=IGFALS PE=1 SV=1	ALS_HUMAN	66	6.78	Homo sapiens	0	2	0	0	0	3	2	0	0	0	0	3	7	7	8	0	0.053	0	0	0	0.071	0.046	0	0	0	0	0.06	0.11	0.16	0.17	0	2	0	0	0	3	2	0	0	0	0	3	6	6
198	Dermcidin OS=Homo sapiens GN=DCD PE=1 SV=2	DCD_HUMAN	11	6.52	Homo sapiens	4	3	3	0	0	0	3	4	2	0	0	0	0	0	0	0.23	0.23	0.23	0	0	0	0.34	0.34	0.2	0	0	0	0	0	0	3	3	3	0	0	0	3	4	2	0	0	0	0	0
199	Serum amyloid A-1 protein OS=Homo sapiens GN=SAA1 PE=1 SV=1	SAA1_HUMAN	14	6.79	Homo sapiens	0	0	0	0	0	0	0	0	0	0	0	4	0	0	0	0	0	0	0	0	0	0	0	0	0	0	0.53	0	0	0	0	0	0	0	0	0	0	0	0	0	0	2	0	0
200	Superoxide dismutase [Mn], mitochondrial OS=Homo sapiens GN=SOD2 PE=1 SV=2	SODM_HUMAN	25	8.45	Homo sapiens	6	8	8	5	4	5	6	5	6	0	0	0	0	0	0	0.27	0.36	0.41	0.33	0.27	0.32	0.41	0.26	0.36	0	0	0	0	0	0	5	6	7	5	4	5	5	4	5	0	0	0	0	0
201	Hexokinase-1 OS=Homo sapiens GN=HK1 PE=1 SV=3	HXK1_HUMAN	102	6.78	Homo sapiens	8	11	8	8	8	9	8	7	6	0	0	0	0	0	0	0.13	0.17	0.13	0.11	0.12	0.14	0.1	0.11	0.1	0	0	0	0	0	0	8	11	8	8	8	9	7	7	6	0	0	0	0	0
202	Neutrophil defensin 3 OS=Homo sapiens GN=DEFA3 PE=1 SV=1	DEF3_HUMAN	10	5.79	Homo sapiens	0	2	2	2	0	2	0	2	2	3	2	2	2	0	2	0	0.19	0.19	0.19	0	0.19	0	0.19	0.19	0.19	0.19	0.19	0.19	0	0.19	0	2	2	2	0	2	0	2	2	2	2	2	2	0
203	Thromboxane-A synthase OS=Homo sapiens GN=TBXAS1 PE=1 SV=3	THAS_HUMAN	61	7.68	Homo sapiens	4	6	6	9	8	8	6	6	6	0	0	0	0	0	0	0.1	0.15	0.14	0.24	0.19	0.21	0.17	0.13	0.17	0	0	0	0	0	0	4	6	6	9	8	8	6	6	6	0	0	0	0	0
204	Keratin, type I cytoskeletal 17 OS=Homo sapiens GN=KRT17 PE=1 SV=2	K1C17_HUMAN	48	4.67	Homo sapiens	0	0	0	7	6	7	0	0	0	18	13	14	15	10	12	0	0	0	0.16	0.14	0.16	0	0	0	0.29	0.29	0.26	0.27	0.22	0.24	0	0	0	2	2	3	0	0	0	4	5	4	5	3
205	Guanine nucleotide-binding protein G(I)/G(S)/G(T) subunit beta-1 OS=Homo sapiens GN=GNB1 PE=1 SV=3	GBB1_HUMAN	37	5.85	Homo sapiens	5	6	6	4	3	3	5	5	6	0	0	0	0	0	0	0.18	0.21	0.21	0.13	0.12	0.13	0.18	0.21	0.21	0	0	0	0	0	0	5	6	6	4	3	3	5	5	6	0	0	0	0	0
206	Transgelin-2 OS=Homo sapiens GN=TAGLN2 PE=1 SV=3	TAGL2_HUMAN	22	8.45	Homo sapiens	3	3	7	5	5	5	6	6	5	0	0	0	0	0	0	0.2	0.19	0.44	0.37	0.31	0.3	0.37	0.3	0.24	0	0	0	0	0	0	3	3	6	5	5	5	5	4	4	0	0	0	0	0
207	Beta-parvin OS=Homo sapiens GN=PARVB PE=1 SV=1	PARVB_HUMAN	42	6.72	Homo sapiens	3	4	3	7	5	7	3	2	3	0	0	0	0	0	0	0.12	0.16	0.13	0.23	0.15	0.2	0.091	0.052	0.12	0	0	0	0	0	0	3	4	3	7	5	6	3	2	3	0	0	0	0	0
208	Junction plakoglobin OS=Homo sapiens GN=JUP PE=1 SV=3	PLAK_HUMAN	82	6.05	Homo sapiens	0	0	0	0	0	0	2	2	0	6	5	4	7	0	0	0	0	0	0	0	0	0.04	0.04	0	0.098	0.085	0.075	0.12	0	0	0	0	0	0	0	0	2	2	0	6	5	4	7	0
209	Ig alpha-2 chain C region OS=Homo sapiens GN=IGHA2 PE=1 SV=3	IGHA2_HUMAN	37	6.02	Homo sapiens	0	0	0	13	0	8	0	0	0	17	12	17	12	18	19	0	0	0	0.36	0	0.34	0	0	0	0.38	0.33	0.46	0.41	0.44	0.45	0	0	0	2	0	2	0	0	0	2	2	3	3	2
210	Caldesmon OS=Homo sapiens GN=CALD1 PE=1 SV=3	CALD1_HUMAN	93	5.35	Homo sapiens	4	2	8	5	4	6	0	2	3	0	0	0	0	0	0	0.079	0.038	0.13	0.079	0.079	0.092	0	0.048	0.034	0	0	0	0	0	0	4	2	8	5	4	6	0	2	3	0	0	0	0	0
211	Actin, alpha cardiac muscle 1 OS=Homo sapiens GN=ACTC1 PE=1 SV=1	ACTC_HUMAN	42	5.05	Homo sapiens	45	41	46	47	44	48	45	42	45	0	0	0	0	0	0	0.35	0.32	0.34	0.32	0.31	0.33	0.35	0.33	0.33	0	0	0	0	0	0	2	3	2	2	3	2	3	3	2	0	0	0	0	0
212	Junctional adhesion molecule A OS=Homo sapiens GN=F11R PE=1 SV=1	JAM1_HUMAN	33	8.02	Homo sapiens	6	6	4	3	5	6	4	5	4	0	0	0	0	0	0	0.27	0.31	0.23	0.19	0.27	0.27	0.23	0.23	0.23	0	0	0	0	0	0	5	5	4	3	5	6	4	5	4	0	0	0	0	0
213	Platelet glycoprotein Ib beta chain OS=Homo sapiens GN=GP1BB PE=1 SV=1	GP1BB_HUMAN	22	9.37	Homo sapiens	5	5	4	5	4	5	5	5	3	0	0	0	0	0	0	0.22	0.22	0.18	0.22	0.18	0.19	0.22	0.22	0.14	0	0	0	0	0	0	5	5	4	5	4	5	5	5	3	0	0	0	0	0
214	Tetranectin OS=Homo sapiens GN=CLEC3B PE=1 SV=3	TETN_HUMAN	23	5.36	Homo sapiens	2	0	2	0	2	0	0	4	2	0	2	0	3	2	2	0.13	0	0.13	0	0.17	0	0	0.13	0.13	0	0.12	0	0.18	0.11	0.11	2	0	2	0	2	0	0	2	2	0	2	0	3	2
215	Complement C4-A OS=Homo sapiens GN=C4A PE=1 SV=2	CO4A_HUMAN	193	7.08	Homo sapiens	97	93	88	87	0	70	74	70	76	122	130	135	141	124	133	0.49	0.44	0.42	0.45	0	0.46	0.35	0.39	0.39	0.49	0.5	0.5	0.55	0.53	0.53	3	2	2	3	0	2	3	3	3	2	5	3	4	4
216	Calnexin OS=Homo sapiens GN=CANX PE=1 SV=2	CALX_HUMAN	68	4.21	Homo sapiens	4	3	3	3	3	4	2	2	4	0	0	0	0	0	0	0.088	0.09	0.074	0.071	0.071	0.083	0.056	0.039	0.066	0	0	0	0	0	0	4	3	3	3	3	4	2	2	4	0	0	0	0	0
217	Tubulin alpha-4A chain OS=Homo sapiens GN=TUBA4A PE=1 SV=1	TBA4A_HUMAN	50	4.69	Homo sapiens	17	20	22	19	16	17	19	16	19	0	0	0	0	0	0	0.36	0.46	0.48	0.38	0.39	0.36	0.44	0.4	0.45	0	0	0	0	0	0	5	4	3	5	5	4	5	5	5	0	0	0	0	0
218	Sulfhydryl oxidase 1 OS=Homo sapiens GN=QSOX1 PE=1 SV=3	QSOX1_HUMAN	83	9.18	Homo sapiens	3	4	3	2	3	3	0	0	0	5	6	6	7	7	11	0.062	0.062	0.062	0.04	0.062	0.062	0	0	0	0.086	0.11	0.11	0.11	0.12	0.19	3	3	3	2	3	3	0	0	0	5	6	6	6	7
219	Voltage-dependent anion-selective channel protein 3 OS=Homo sapiens GN=VDAC3 PE=1 SV=1	VDAC3_HUMAN	31	8.9	Homo sapiens	6	3	7	4	4	7	5	7	5	0	0	0	0	0	0	0.19	0.074	0.24	0.22	0.22	0.36	0.23	0.35	0.18	0	0	0	0	0	0	4	2	5	4	4	7	5	7	5	0	0	0	0	0
220	Solute carrier family 2, facilitated glucose transporter member 1 OS=Homo sapiens GN=SLC2A1 PE=1 SV=2	GTR1_HUMAN	54	8.92	Homo sapiens	2	0	0	0	2	2	2	2	3	0	0	0	0	0	0	0.039	0	0	0	0.039	0.039	0.039	0.055	0.059	0	0	0	0	0	0	2	0	0	0	2	2	2	2	3	0	0	0	0	0
221	Sarcoplasmic/endoplasmic reticulum calcium ATPase 2 OS=Homo sapiens GN=ATP2A2 PE=1 SV=1	AT2A2_HUMAN	115	4.99	Homo sapiens	0	7	9	9	7	8	7	6	7	0	0	0	0	0	0	0	0.094	0.11	0.13	0.098	0.11	0.081	0.072	0.096	0	0	0	0	0	0	0	3	4	5	4	5	2	5	5	0	0	0	0	0
222	Protein S100-A8 OS=Homo sapiens GN=S100A8 PE=1 SV=1	S10A8_HUMAN	11	7.07	Homo sapiens	0	0	0	2	2	0	0	0	0	3	3	0	3	0	0	0	0	0	0.24	0.24	0	0	0	0	0.19	0.2	0	0.19	0	0	0	0	0	2	2	0	0	0	0	2	2	0	2	0
223	Monocyte differentiation antigen CD14 OS=Homo sapiens GN=CD14 PE=1 SV=2	CD14_HUMAN	40	6.16	Homo sapiens	3	4	3	0	3	3	4	0	2	2	5	3	3	3	7	0.19	0.2	0.15	0	0.18	0.19	0.23	0	0.072	0.051	0.12	0.069	0.075	0.16	0.15	3	4	3	0	3	3	4	0	2	2	4	2	2	3
224	Transforming protein RhoA OS=Homo sapiens GN=RHOA PE=1 SV=1	RHOA_HUMAN	22	5.89	Homo sapiens	4	4	6	3	3	2	5	5	5	0	0	0	0	0	0	0.21	0.2	0.27	0.2	0.2	0.14	0.31	0.27	0.27	0	0	0	0	0	0	4	4	6	3	3	2	5	5	5	0	0	0	0	0
225	ADP/ATP translocase 2 OS=Homo sapiens GN=SLC25A5 PE=1 SV=7	ADT2_HUMAN	33	10.18	Homo sapiens	3	4	5	3	4	5	5	4	4	0	0	0	0	0	0	0.11	0.14	0.18	0.11	0.13	0.16	0.16	0.19	0.2	0	0	0	0	0	0	3	4	5	3	4	5	5	4	4	0	0	0	0	0
226	14-3-3 protein eta OS=Homo sapiens GN=YWHAH PE=1 SV=4	1433F_HUMAN	28	4.47	Homo sapiens	4	6	4	5	2	5	6	3	5	0	0	0	0	0	0	0.2	0.3	0.17	0.26	0.045	0.21	0.3	0.13	0.21	0	0	0	0	0	0	4	5	3	5	2	5	5	2	4	0	0	0	0	0
227	PDZ and LIM domain protein 1 OS=Homo sapiens GN=PDLIM1 PE=1 SV=4	PDLI1_HUMAN	36	7.03	Homo sapiens	5	6	9	5	7	4	3	4	7	0	0	0	0	0	0	0.19	0.31	0.36	0.2	0.32	0.17	0.11	0.18	0.34	0	0	0	0	0	0	5	6	8	5	7	4	3	4	7	0	0	0	0	0
228	Actin-related protein 2/3 complex subunit 1B OS=Homo sapiens GN=ARPC1B PE=1 SV=3	ARC1B_HUMAN	41	8.44	Homo sapiens	4	2	3	3	3	3	2	3	4	0	0	0	0	0	0	0.16	0.086	0.13	0.11	0.11	0.11	0.086	0.11	0.16	0	0	0	0	0	0	4	2	3	3	3	3	2	3	4	0	0	0	0	0
229	Complement factor I OS=Homo sapiens GN=CFI PE=1 SV=2	CFAI_HUMAN	66	7.53	Homo sapiens	0	0	0	0	3	2	0	0	0	5	3	5	4	9	10	0	0	0	0	0.07	0.045	0	0	0	0.098	0.067	0.081	0.075	0.18	0.21	0	0	0	0	3	2	0	0	0	4	3	4	3	8
230	EMILIN-1 OS=Homo sapiens GN=EMILIN1 PE=1 SV=2	EMIL1_HUMAN	107	4.81	Homo sapiens	6	4	8	7	4	7	5	5	6	0	0	0	0	0	0	0.094	0.056	0.13	0.13	0.071	0.094	0.094	0.077	0.089	0	0	0	0	0	0	6	4	8	7	4	7	5	5	6	0	0	0	0	0
231	Ras suppressor protein 1 OS=Homo sapiens GN=RSU1 PE=1 SV=3	RSU1_HUMAN	32	9.16	Homo sapiens	4	3	4	2	4	2	3	0	2	0	0	0	0	0	0	0.16	0.16	0.23	0.12	0.22	0.12	0.16	0	0.12	0	0	0	0	0	0	4	3	4	2	4	2	3	0	2	0	0	0	0	0
232	Integrin alpha-M OS=Homo sapiens GN=ITGAM PE=1 SV=2	ITAM_HUMAN	127	7.24	Homo sapiens	0	0	0	0	0	0	0	0	0	0	0	0	0	0	0	0	0	0	0	0	0	0	0	0	0	0	0	0	0	0	0	0	0	0	0	0	0	0	0	0	0	0	0	0
233	Platelet glycoprotein V OS=Homo sapiens GN=GP5 PE=1 SV=1	GPV_HUMAN	61	10.24	Homo sapiens	0	6	4	4	3	4	5	6	3	0	0	0	0	0	0	0	0.18	0.13	0.13	0.077	0.13	0.15	0.16	0.08	0	0	0	0	0	0	0	6	4	4	3	4	5	6	3	0	0	0	0	0
234	Complement C2 OS=Homo sapiens GN=C2 PE=1 SV=2	CO2_HUMAN	83	7.43	Homo sapiens	0	0	0	0	0	0	0	0	0	5	2	8	2	4	8	0	0	0	0	0	0	0	0	0	0.094	0.062	0.14	0.037	0.085	0.11	0	0	0	0	0	0	0	0	0	4	2	8	2	4
235	Ig kappa chain V-I region WEA OS=Homo sapiens PE=1 SV=1	KV118_HUMAN	12	9.15	Homo sapiens	0	3	0	3	2	0	2	0	0	0	0	0	0	3	0	0	0.22	0	0.22	0.22	0	0.22	0	0	0	0	0	0	0.17	0	0	2	0	2	2	0	2	0	0	0	0	0	0	2
236	Desmoglein-1 OS=Homo sapiens GN=DSG1 PE=1 SV=2	DSG1_HUMAN	114	4.66	Homo sapiens	0	0	0	0	0	0	2	2	3	5	3	0	0	0	0	0	0	0	0	0	0	0.029	0.025	0.038	0.061	0.044	0	0	0	0	0	0	0	0	0	0	2	2	3	5	3	0	0	0
237	Cholesteryl ester transfer protein OS=Homo sapiens GN=CETP PE=1 SV=2	CETP_HUMAN	55	6.02	Homo sapiens	2	3	6	0	0	0	2	0	2	7	8	8	9	8	10	0.043	0.065	0.14	0	0	0	0.034	0	0.034	0.19	0.22	0.19	0.2	0.18	0.25	2	3	6	0	0	0	2	0	2	7	8	7	7	7
238	F-actin-capping protein subunit beta OS=Homo sapiens GN=CAPZB PE=1 SV=4	CAPZB_HUMAN	31	5.23	Homo sapiens	3	3	5	3	2	3	5	4	3	0	0	0	0	0	0	0.16	0.16	0.26	0.19	0.12	0.16	0.25	0.23	0.16	0	0	0	0	0	0	3	3	5	3	2	3	4	4	3	0	0	0	0	0
239	Filaggrin OS=Homo sapiens GN=FLG PE=1 SV=3	FILA_HUMAN	435	9.6	Homo sapiens	0	0	0	0	0	0	0	0	0	0	0	0	0	0	0	0	0	0	0	0	0	0	0	0	0	0	0	0	0	0	0	0	0	0	0	0	0	0	0	0	0	0	0	0
240	Ig heavy chain V-III region TIL OS=Homo sapiens PE=1 SV=1	HV304_HUMAN	12	9.4	Homo sapiens	0	0	0	0	0	0	0	0	0	0	0	0	0	0	0	0	0	0	0	0	0	0	0	0	0	0	0	0	0	0	0	0	0	0	0	0	0	0	0	0	0	0	0	0
241	14-3-3 protein epsilon OS=Homo sapiens GN=YWHAE PE=1 SV=1	1433E_HUMAN	29	4.36	Homo sapiens	3	5	5	2	4	4	3	4	4	0	0	0	0	0	0	0.21	0.3	0.31	0.16	0.27	0.24	0.15	0.19	0.19	0	0	0	0	0	0	3	5	4	2	4	4	3	3	3	0	0	0	0	0
242	Peroxisomal multifunctional enzyme type 2 OS=Homo sapiens GN=HSD17B4 PE=1 SV=3	DHB4_HUMAN	80	9.21	Homo sapiens	6	8	4	3	5	5	3	5	8	0	0	0	0	0	0	0.12	0.15	0.076	0.061	0.1	0.1	0.061	0.099	0.12	0	0	0	0	0	0	6	8	4	3	5	5	3	5	6	0	0	0	0	0
243	Retinol-binding protein 4 OS=Homo sapiens GN=RBP4 PE=1 SV=3	RET4_HUMAN	23	5.85	Homo sapiens	0	0	0	0	0	0	0	0	0	5	6	3	6	5	6	0	0	0	0	0	0	0	0	0	0.3	0.29	0.19	0.36	0.2	0.36	0	0	0	0	0	0	0	0	0	5	5	3	5	3
244	Kallistatin OS=Homo sapiens GN=SERPINA4 PE=1 SV=3	KAIN_HUMAN	49	7.85	Homo sapiens	0	0	0	0	0	0	0	0	0	6	6	9	8	9	11	0	0	0	0	0	0	0	0	0	0.18	0.16	0.25	0.21	0.18	0.27	0	0	0	0	0	0	0	0	0	6	5	8	7	6
245	Zinc-alpha-2-glycoprotein OS=Homo sapiens GN=AZGP1 PE=1 SV=2	ZA2G_HUMAN	34	5.92	Homo sapiens	0	0	0	0	0	0	0	0	0	4	3	3	5	7	10	0	0	0	0	0	0	0	0	0	0.16	0.057	0.13	0.17	0.21	0.25	0	0	0	0	0	0	0	0	0	4	2	3	5	5
246	Tropomyosin alpha-3 chain OS=Homo sapiens GN=TPM3 PE=1 SV=2	TPM3_HUMAN	33	4.38	Homo sapiens	8	0	8	9	0	9	0	0	0	0	0	0	0	0	0	0.22	0	0.21	0.23	0	0.24	0	0	0	0	0	0	0	0	0	2	0	2	2	0	2	0	0	0	0	0	0	0	0
247	Peptidyl-prolyl cis-trans isomerase F, mitochondrial OS=Homo sapiens GN=PPIF PE=1 SV=1	PPIF_HUMAN	22	9.95	Homo sapiens	6	4	3	4	4	4	4	3	6	0	0	0	0	0	0	0.44	0.36	0.31	0.4	0.29	0.26	0.43	0.31	0.4	0	0	0	0	0	0	5	4	3	4	4	3	4	3	5	0	0	0	0	0
248	Phosphatidylinositide phosphatase SAC1 OS=Homo sapiens GN=SACM1L PE=1 SV=2	SAC1_HUMAN	67	7.13	Homo sapiens	7	5	5	4	4	2	5	3	4	0	0	0	0	0	0	0.11	0.092	0.08	0.078	0.077	0.048	0.082	0.061	0.077	0	0	0	0	0	0	7	5	5	4	4	2	5	3	4	0	0	0	0	0
249	CD9 antigen OS=Homo sapiens GN=CD9 PE=1 SV=4	CD9_HUMAN	25	7.19	Homo sapiens	2	2	3	0	0	0	0	2	0	0	0	0	0	0	0	0.092	0.092	0.2	0	0	0	0	0.092	0	0	0	0	0	0	0	2	2	3	0	0	0	0	2	0	0	0	0	0	0
250	Angiogenin OS=Homo sapiens GN=ANG PE=1 SV=1	ANGI_HUMAN	17	10.09	Homo sapiens	3	0	0	3	0	2	0	3	0	0	0	0	0	0	0	0.28	0	0	0.33	0	0.26	0	0.33	0	0	0	0	0	0	0	3	0	0	3	0	2	0	3	0	0	0	0	0	0
251	Phospholipid transfer protein OS=Homo sapiens GN=PLTP PE=1 SV=1	PLTP_HUMAN	55	7.01	Homo sapiens	2	3	3	3	0	0	0	0	0	4	3	3	3	3	3	0.067	0.095	0.095	0.095	0	0	0	0	0	0.1	0.081	0.087	0.087	0.079	0.079	2	3	3	3	0	0	0	0	0	4	3	3	3	3
252	Glutathione peroxidase 3 OS=Homo sapiens GN=GPX3 PE=1 SV=2	GPX3_HUMAN	26	8.29	Homo sapiens	0	0	0	0	0	0	0	0	0	7	7	6	6	7	8	0	0	0	0	0	0	0	0	0	0.29	0.29	0.29	0.22	0.23	0.29	0	0	0	0	0	0	0	0	0	5	5	5	4	4
253	Thymosin beta-4 OS=Homo sapiens GN=TMSB4X PE=1 SV=2	TYB4_HUMAN	5	4.72	Homo sapiens	3	2	3	2	3	3	0	4	3	0	0	0	0	0	0	0.32	0.32	0.32	0.36	0.36	0.36	0	0.64	0.36	0	0	0	0	0	0	2	2	2	2	3	2	0	3	3	0	0	0	0	0
254	Malate dehydrogenase, mitochondrial OS=Homo sapiens GN=MDH2 PE=1 SV=3	MDHM_HUMAN	36	8.9	Homo sapiens	6	5	3	7	4	4	5	3	5	0	0	0	0	0	0	0.22	0.19	0.14	0.28	0.11	0.2	0.16	0.14	0.25	0	0	0	0	0	0	5	4	3	6	2	4	3	3	5	0	0	0	0	0
255	Histone H2A type 1-D OS=Homo sapiens GN=HIST1H2AD PE=1 SV=2	H2A1D_HUMAN (+6)	14	11.55	Homo sapiens	0	0	0	0	2	0	0	0	0	0	0	0	0	0	0	0	0	0	0	0.14	0	0	0	0	0	0	0	0	0	0	0	0	0	0	2	0	0	0	0	0	0	0	0	0
256	HLA class I histocompatibility antigen, A-3 alpha chain OS=Homo sapiens GN=HLA-A PE=1 SV=2	1A03_HUMAN	41	5.85	Homo sapiens	6	8	7	8	6	8	5	7	9	0	0	0	0	0	0	0.18	0.3	0.25	0.25	0.25	0.25	0.17	0.23	0.27	0	0	0	0	0	0	2	3	3	3	3	2	2	2	3	0	0	0	0	0
257	Triosephosphate isomerase OS=Homo sapiens GN=TPI1 PE=1 SV=3	TPIS_HUMAN	31	5.72	Homo sapiens	3	6	6	4	2	4	3	2	3	0	0	0	0	0	0	0.13	0.27	0.22	0.17	0.077	0.17	0.12	0.087	0.12	0	0	0	0	0	0	3	6	5	4	2	4	3	2	3	0	0	0	0	0
258	Receptor-type tyrosine-protein phosphatase eta OS=Homo sapiens GN=PTPRJ PE=1 SV=3	PTPRJ_HUMAN	146	5.28	Homo sapiens	5	5	5	3	2	2	3	7	4	0	0	0	0	0	0	0.058	0.055	0.056	0.028	0.024	0.024	0.023	0.066	0.047	0	0	0	0	0	0	5	5	5	3	2	2	3	7	4	0	0	0	0	0
259	Ig mu heavy chain disease protein OS=Homo sapiens PE=1 SV=1	MUCB_HUMAN	43	4.89	Homo sapiens	36	0	0	0	0	31	0	0	0	0	0	0	0	0	0	0.51	0	0	0	0	0.5	0	0	0	0	0	0	0	0	0	2	0	0	0	0	2	0	0	0	0	0	0	0	0
260	Protein disulfide-isomerase OS=Homo sapiens GN=P4HB PE=1 SV=3	PDIA1_HUMAN	57	4.49	Homo sapiens	3	5	4	3	2	4	3	3	4	0	0	0	0	0	0	0.065	0.13	0.085	0.094	0.055	0.11	0.073	0.071	0.1	0	0	0	0	0	0	3	5	4	3	2	4	3	3	4	0	0	0	0	0
261	Integrin beta-2 OS=Homo sapiens GN=ITGB2 PE=1 SV=2	ITB2_HUMAN	85	6.94	Homo sapiens	0	0	0	0	0	0	0	0	0	0	0	0	0	0	0	0	0	0	0	0	0	0	0	0	0	0	0	0	0	0	0	0	0	0	0	0	0	0	0	0	0	0	0	0
262	Complement factor H-related protein 2 OS=Homo sapiens GN=CFHR2 PE=1 SV=1	FHR2_HUMAN	31	6.34	Homo sapiens	9	10	14	10	0	12	10	0	0	0	0	0	0	0	0	0.33	0.21	0.33	0.29	0	0.39	0.17	0	0	0	0	0	0	0	0	2	2	2	2	0	2	2	0	0	0	0	0	0	0
263	Lysozyme C OS=Homo sapiens GN=LYZ PE=1 SV=1	LYSC_HUMAN	17	9.35	Homo sapiens	0	0	2	0	0	0	0	0	2	0	0	0	0	0	0	0	0	0.14	0	0	0	0	0	0.14	0	0	0	0	0	0	0	0	2	0	0	0	0	0	2	0	0	0	0	0
264	Tyrosine-protein kinase Lyn OS=Homo sapiens GN=LYN PE=1 SV=3	LYN_HUMAN	59	7.13	Homo sapiens	3	3	6	3	3	3	4	4	5	0	0	0	0	0	0	0.082	0.068	0.11	0.068	0.068	0.068	0.084	0.084	0.13	0	0	0	0	0	0	3	3	5	3	3	3	4	4	5	0	0	0	0	0
265	Prostaglandin G/H synthase 1 OS=Homo sapiens GN=PTGS1 PE=1 SV=2	PGH1_HUMAN	69	7.25	Homo sapiens	0	4	5	4	2	3	2	2	4	0	0	0	0	0	0	0	0.08	0.12	0.093	0.047	0.072	0.058	0.018	0.048	0	0	0	0	0	0	0	4	5	4	2	3	2	2	3	0	0	0	0	0
266	Complement factor H-related protein 4 OS=Homo sapiens GN=CFHR4 PE=1 SV=3	FHR4_HUMAN	65	4.58	Homo sapiens	0	0	0	0	0	0	0	0	0	2	2	3	3	2	2	0	0	0	0	0	0	0	0	0	0.036	0.036	0.062	0.036	0.036	0.042	0	0	0	0	0	0	0	0	0	2	2	3	2	2
267	Ig heavy chain V-III region GAL OS=Homo sapiens PE=1 SV=1	HV320_HUMAN	13	8.7	Homo sapiens	0	2	2	2	0	0	0	0	0	4	5	4	2	5	3	0	0.17	0.17	0.17	0	0	0	0	0	0.27	0.27	0.27	0.17	0.27	0.27	0	2	2	2	0	0	0	0	0	3	3	3	2	3
268	Phosphoglycerate kinase 1 OS=Homo sapiens GN=PGK1 PE=1 SV=3	PGK1_HUMAN	45	8.27	Homo sapiens	0	0	3	2	3	0	0	2	4	0	0	0	0	0	0	0	0	0.1	0.072	0.1	0	0	0.067	0.14	0	0	0	0	0	0	0	0	3	2	3	0	0	2	4	0	0	0	0	0
269	Erythrocyte membrane protein band 4.2 OS=Homo sapiens GN=EPB42 PE=1 SV=3	EPB42_HUMAN	77	8.17	Homo sapiens	0	2	2	0	0	0	0	2	0	0	0	0	0	0	0	0	0.039	0.039	0	0	0	0	0.023	0	0	0	0	0	0	0	0	2	2	0	0	0	0	2	0	0	0	0	0	0
270	Guanine nucleotide-binding protein G(q) subunit alpha OS=Homo sapiens GN=GNAQ PE=1 SV=4	GNAQ_HUMAN	42	5.37	Homo sapiens	3	4	5	3	2	3	3	0	0	0	0	0	0	0	0	0.089	0.15	0.2	0.13	0.089	0.13	0.13	0	0	0	0	0	0	0	0	3	4	5	3	2	3	3	0	0	0	0	0	0	0
271	Ig kappa chain V-IV region B17 OS=Homo sapiens PE=2 SV=1	KV404_HUMAN	15	6.51	Homo sapiens	0	0	0	3	3	0	0	0	0	0	2	2	0	2	2	0	0	0	0.29	0.29	0	0	0	0	0	0.18	0.25	0	0.2	0.18	0	0	0	2	2	0	0	0	0	0	2	2	0	2
272	C4b-binding protein beta chain OS=Homo sapiens GN=C4BPB PE=1 SV=1	C4BPB_HUMAN	28	4.8	Homo sapiens	2	2	0	0	0	0	0	0	0	2	2	2	2	2	4	0.083	0.083	0	0	0	0	0	0	0	0.1	0.1	0.1	0.1	0.083	0.19	2	2	0	0	0	0	0	0	0	2	2	2	2	2
273	Retinol dehydrogenase 11 OS=Homo sapiens GN=RDH11 PE=1 SV=2	RDH11_HUMAN	35	9.06	Homo sapiens	0	2	2	2	0	4	2	3	3	0	0	0	0	0	0	0	0.085	0.085	0.082	0	0.18	0.085	0.12	0.12	0	0	0	0	0	0	0	2	2	2	0	4	2	3	3	0	0	0	0	0
274	Ig heavy chain V-III region BUT OS=Homo sapiens PE=1 SV=1	HV306_HUMAN	12	9.48	Homo sapiens	0	0	0	0	0	0	0	0	0	2	2	0	2	3	3	0	0	0	0	0	0	0	0	0	0.19	0.19	0	0.19	0.19	0.19	0	0	0	0	0	0	0	0	0	2	2	0	2	2
275	EH domain-containing protein 3 OS=Homo sapiens GN=EHD3 PE=1 SV=2	EHD3_HUMAN	61	6.53	Homo sapiens	2	2	2	2	0	2	3	2	0	0	0	0	0	0	0	0.043	0.043	0.043	0.043	0	0.043	0.064	0.043	0	0	0	0	0	0	0	2	2	2	2	0	2	3	2	0	0	0	0	0	0
276	Amine oxidase [flavin-containing] B OS=Homo sapiens GN=MAOB PE=1 SV=3	AOFB_HUMAN	59	7.55	Homo sapiens	3	0	3	2	3	3	3	2	3	0	0	0	0	0	0	0.052	0	0.052	0.05	0.052	0.052	0.052	0.05	0.071	0	0	0	0	0	0	3	0	3	2	3	3	3	2	3	0	0	0	0	0
277	Cathelicidin antimicrobial peptide OS=Homo sapiens GN=CAMP PE=1 SV=1	CAMP_HUMAN	19	10.03	Homo sapiens	0	0	0	0	0	0	0	0	0	0	3	2	2	3	3	0	0	0	0	0	0	0	0	0	0	0.19	0.11	0.11	0.19	0.19	0	0	0	0	0	0	0	0	0	0	3	2	2	3
278	Actin-related protein 2 OS=Homo sapiens GN=ACTR2 PE=1 SV=1	ARP2_HUMAN	45	6.72	Homo sapiens	3	3	2	2	2	3	2	4	3	0	0	0	0	0	0	0.13	0.12	0.091	0.11	0.11	0.17	0.11	0.18	0.14	0	0	0	0	0	0	3	3	2	2	2	3	2	4	3	0	0	0	0	0
279	Calponin-2 OS=Homo sapiens GN=CNN2 PE=1 SV=4	CNN2_HUMAN	34	7.38	Homo sapiens	0	2	6	2	3	4	2	5	5	0	0	0	0	0	0	0	0.1	0.29	0.087	0.14	0.19	0.1	0.24	0.18	0	0	0	0	0	0	0	2	6	2	3	4	2	5	5	0	0	0	0	0
280	Voltage-dependent anion-selective channel protein 2 OS=Homo sapiens GN=VDAC2 PE=1 SV=2	VDAC2_HUMAN	32	7.65	Homo sapiens	2	3	3	3	2	4	2	2	0	0	0	0	0	0	0	0.1	0.18	0.15	0.18	0.11	0.22	0.078	0.11	0	0	0	0	0	0	0	2	3	3	3	2	4	2	2	0	0	0	0	0	0
281	Stress-70 protein, mitochondrial OS=Homo sapiens GN=HSPA9 PE=1 SV=2	GRP75_HUMAN	74	6.01	Homo sapiens	3	4	4	2	2	3	4	4	0	0	0	0	0	0	0	0.054	0.078	0.075	0.034	0.034	0.05	0.08	0.056	0	0	0	0	0	0	0	3	4	4	2	2	3	4	3	0	0	0	0	0	0
282	Carboxypeptidase B2 OS=Homo sapiens GN=CPB2 PE=1 SV=2	CBPB2_HUMAN	48	7.77	Homo sapiens	0	0	2	0	0	0	0	0	0	4	8	4	6	7	9	0	0	0.066	0	0	0	0	0	0	0.13	0.23	0.12	0.18	0.17	0.22	0	0	2	0	0	0	0	0	0	4	6	4	5	5
283	Ig lambda chain V-III region LOI OS=Homo sapiens PE=1 SV=1	LV302_HUMAN	12	4.72	Homo sapiens	0	0	0	0	0	0	0	0	0	2	3	3	2	0	3	0	0	0	0	0	0	0	0	0	0.22	0.29	0.29	0.22	0	0.22	0	0	0	0	0	0	0	0	0	2	3	3	2	0
284	Ig gamma-4 chain C region OS=Homo sapiens GN=IGHG4 PE=1 SV=1	IGHG4_HUMAN	36	7.41	Homo sapiens	17	18	0	0	0	0	0	0	0	20	18	19	19	0	30	0.36	0.41	0	0	0	0	0	0	0	0.38	0.35	0.43	0.41	0	0.43	2	2	0	0	0	0	0	0	0	2	2	2	3	0
285	Integrin alpha-2 OS=Homo sapiens GN=ITGA2 PE=1 SV=1	ITA2_HUMAN	129	4.95	Homo sapiens	6	4	5	3	3	3	3	2	3	0	0	0	0	0	0	0.07	0.044	0.055	0.03	0.03	0.03	0.03	0.021	0.036	0	0	0	0	0	0	6	4	5	3	3	3	3	2	3	0	0	0	0	0
286	Syntaxin-11 OS=Homo sapiens GN=STX11 PE=1 SV=1	STX11_HUMAN	33	6.51	Homo sapiens	6	7	5	4	5	3	2	3	5	0	0	0	0	0	0	0.25	0.3	0.25	0.18	0.21	0.11	0.1	0.17	0.17	0	0	0	0	0	0	5	6	5	4	5	3	2	3	4	0	0	0	0	0
287	Endonuclease domain-containing 1 protein OS=Homo sapiens GN=ENDOD1 PE=1 SV=2	ENDD1_HUMAN	55	5.38	Homo sapiens	2	0	0	2	2	3	4	2	5	0	0	0	0	0	0	0.058	0	0	0.048	0.052	0.078	0.11	0.052	0.1	0	0	0	0	0	0	2	0	0	2	2	3	4	2	5	0	0	0	0	0
288	Hepatocyte growth factor activator OS=Homo sapiens GN=HGFAC PE=1 SV=1	HGFA_HUMAN	71	7.24	Homo sapiens	5	5	6	5	9	7	4	5	3	0	0	0	0	0	0	0.1	0.12	0.12	0.12	0.17	0.17	0.092	0.12	0.06	0	0	0	0	0	0	4	5	5	5	8	7	4	5	3	0	0	0	0	0
289	Chloride intracellular channel protein 1 OS=Homo sapiens GN=CLIC1 PE=1 SV=4	CLIC1_HUMAN	27	4.82	Homo sapiens	3	3	2	3	2	0	4	5	3	0	0	0	0	0	0	0.16	0.16	0.083	0.16	0.12	0	0.2	0.24	0.16	0	0	0	0	0	0	3	3	2	3	2	0	4	5	3	0	0	0	0	0
290	Prohibitin-2 OS=Homo sapiens GN=PHB2 PE=1 SV=2	PHB2_HUMAN	33	10.41	Homo sapiens	6	5	4	4	5	5	3	3	4	0	0	0	0	0	0	0.21	0.2	0.18	0.18	0.2	0.21	0.12	0.13	0.16	0	0	0	0	0	0	5	5	4	4	5	5	3	3	4	0	0	0	0	0
291	Ig heavy chain V-III region TRO OS=Homo sapiens PE=1 SV=1	HV301_HUMAN	13	10	Homo sapiens	0	0	0	0	0	0	0	0	0	3	0	0	0	3	2	0	0	0	0	0	0	0	0	0	0.24	0	0	0	0.24	0.24	0	0	0	0	0	0	0	0	0	2	0	0	0	2
292	Ras-related protein Rab-6B OS=Homo sapiens GN=RAB6B PE=1 SV=1	RAB6B_HUMAN	23	5.14	Homo sapiens	5	6	5	4	4	4	3	5	4	0	0	0	0	0	0	0.28	0.35	0.28	0.23	0.22	0.23	0.17	0.28	0.23	0	0	0	0	0	0	4	5	4	3	3	3	3	4	3	0	0	0	0	0
293	B-cell receptor-associated protein 31 OS=Homo sapiens GN=BCAP31 PE=1 SV=3	BAP31_HUMAN	28	8.88	Homo sapiens	3	5	5	3	2	4	3	3	3	0	0	0	0	0	0	0.14	0.2	0.2	0.14	0.081	0.14	0.14	0.14	0.093	0	0	0	0	0	0	3	5	5	3	2	4	3	3	3	0	0	0	0	0
294	Reticulon-4 OS=Homo sapiens GN=RTN4 PE=1 SV=2	RTN4_HUMAN	130	4.14	Homo sapiens	2	0	3	2	2	2	3	2	2	0	0	0	0	0	0	0.023	0	0.03	0.023	0.023	0.023	0.029	0.018	0.029	0	0	0	0	0	0	2	0	3	2	2	2	3	2	2	0	0	0	0	0
295	Plasma serine protease inhibitor OS=Homo sapiens GN=SERPINA5 PE=1 SV=3	IPSP_HUMAN	46	9.76	Homo sapiens	3	4	4	3	3	4	2	3	4	0	0	0	0	0	0	0.089	0.12	0.12	0.084	0.084	0.12	0.054	0.076	0.1	0	0	0	0	0	0	3	4	4	3	3	4	2	3	4	0	0	0	0	0
296	Leucine-rich alpha-2-glycoprotein OS=Homo sapiens GN=LRG1 PE=1 SV=2	A2GL_HUMAN	38	6.95	Homo sapiens	0	0	2	0	0	0	0	0	0	2	0	2	0	3	4	0	0	0.049	0	0	0	0	0	0	0.049	0	0.049	0	0.089	0.16	0	0	2	0	0	0	0	0	0	2	0	2	0	3
297	Suprabasin OS=Homo sapiens GN=SBSN PE=1 SV=2	SBSN_HUMAN	61	7.01	Homo sapiens	2	2	2	0	0	0	0	2	2	0	0	0	0	0	0	0.061	0.061	0.061	0	0	0	0	0.061	0.061	0	0	0	0	0	0	2	2	2	0	0	0	0	2	2	0	0	0	0	0
298	Selenoprotein P OS=Homo sapiens GN=SEPP1 PE=1 SV=3	SEPP1_HUMAN	43	7.92	Homo sapiens	0	2	0	0	0	0	0	0	2	0	0	0	0	2	3	0	0.06	0	0	0	0	0	0	0.06	0	0	0	0	0.06	0.12	0	2	0	0	0	0	0	0	2	0	0	0	0	2
299	Ig kappa chain V-II region RPMI 6410 OS=Homo sapiens PE=4 SV=1	KV206_HUMAN	15	9.53	Homo sapiens	0	4	3	3	0	3	2	3	2	0	0	0	0	0	0	0	0.38	0.38	0.38	0	0.18	0.28	0.38	0.29	0	0	0	0	0	0	0	4	2	2	0	3	2	2	2	0	0	0	0	0
300	L-lactate dehydrogenase A chain OS=Homo sapiens GN=LDHA PE=1 SV=2	LDHA_HUMAN	37	8.45	Homo sapiens	3	0	2	0	3	3	3	2	0	0	0	0	0	0	0	0.13	0	0.081	0	0.093	0.093	0.13	0.057	0	0	0	0	0	0	0	2	0	2	0	2	2	2	2	0	0	0	0	0	0
301	Complement factor D OS=Homo sapiens GN=CFD PE=1 SV=5	CFAD_HUMAN	27	7.77	Homo sapiens	0	0	0	0	0	0	2	0	0	0	0	0	0	0	0	0	0	0	0	0	0	0.2	0	0	0	0	0	0	0	0	0	0	0	0	0	0	2	0	0	0	0	0	0	0
302	Alpha-actinin-4 OS=Homo sapiens GN=ACTN4 PE=1 SV=2	ACTN4_HUMAN	105	5.12	Homo sapiens	23	21	22	20	21	22	17	13	14	0	0	0	0	0	0	0.26	0.26	0.26	0.22	0.21	0.21	0.17	0.16	0.17	0	0	0	0	0	0	7	7	7	4	3	4	3	2	3	0	0	0	0	0
303	Proto-oncogene tyrosine-protein kinase Src OS=Homo sapiens GN=SRC PE=1 SV=3	SRC_HUMAN	60	7.47	Homo sapiens	2	4	3	2	2	0	4	3	2	0	0	0	0	0	0	0.043	0.1	0.076	0.043	0.043	0	0.095	0.058	0.043	0	0	0	0	0	0	2	4	3	2	2	0	4	3	2	0	0	0	0	0
304	Cytochrome b-c1 complex subunit 2, mitochondrial OS=Homo sapiens GN=UQCRC2 PE=1 SV=3	QCR2_HUMAN	48	8.92	Homo sapiens	4	5	3	3	0	3	3	4	3	0	0	0	0	0	0	0.099	0.17	0.099	0.097	0	0.097	0.068	0.097	0.11	0	0	0	0	0	0	3	5	3	3	0	3	2	3	3	0	0	0	0	0
305	Heat shock protein HSP 90-alpha OS=Homo sapiens GN=HSP90AA1 PE=1 SV=5	HS90A_HUMAN	85	4.66	Homo sapiens	2	3	4	0	0	0	2	2	2	0	0	0	0	0	0	0.04	0.053	0.068	0	0	0	0.038	0.029	0.041	0	0	0	0	0	0	2	3	4	0	0	0	2	2	2	0	0	0	0	0
306	Glycerol-3-phosphate dehydrogenase, mitochondrial OS=Homo sapiens GN=GPD2 PE=1 SV=3	GPDM_HUMAN	81	7.77	Homo sapiens	3	4	5	3	6	6	2	5	4	0	0	0	0	0	0	0.052	0.07	0.091	0.058	0.11	0.11	0.033	0.095	0.073	0	0	0	0	0	0	3	4	5	3	6	6	2	5	4	0	0	0	0	0
307	Peroxiredoxin-1 OS=Homo sapiens GN=PRDX1 PE=1 SV=1	PRDX1_HUMAN	22	8.31	Homo sapiens	0	3	2	0	0	0	0	2	2	0	0	0	0	0	0	0	0.22	0.11	0	0	0	0	0.17	0.17	0	0	0	0	0	0	0	3	2	0	0	0	0	2	2	0	0	0	0	0
308	Ras-related protein Rab-11A OS=Homo sapiens GN=RAB11A PE=1 SV=3	RB11A_HUMAN (+1)	24	6.53	Homo sapiens	5	4	4	4	4	3	4	3	3	0	0	0	0	0	0	0.26	0.22	0.22	0.22	0.22	0.16	0.22	0.15	0.15	0	0	0	0	0	0	5	4	4	4	4	3	4	3	3	0	0	0	0	0
309	Disintegrin and metalloproteinase domain-containing protein 10 OS=Homo sapiens GN=ADAM10 PE=1 SV=1	ADA10_HUMAN	84	7.81	Homo sapiens	3	3	4	2	4	4	3	2	0	0	0	0	0	0	0	0.075	0.078	0.087	0.039	0.071	0.063	0.063	0.023	0	0	0	0	0	0	0	3	3	4	2	4	4	3	2	0	0	0	0	0	0
310	Dolichyl-diphosphooligosaccharide--protein glycosyltransferase subunit 1 OS=Homo sapiens GN=RPN1 PE=1 SV=1	RPN1_HUMAN	69	6.34	Homo sapiens	0	0	0	3	5	3	0	4	2	0	0	0	0	0	0	0	0	0	0.076	0.12	0.076	0	0.092	0.036	0	0	0	0	0	0	0	0	0	3	5	3	0	4	2	0	0	0	0	0
311	Alpha-synuclein OS=Homo sapiens GN=SNCA PE=1 SV=1	SYUA_HUMAN	14	4.37	Homo sapiens	0	2	3	2	0	2	0	3	4	0	0	0	0	0	0	0	0.17	0.26	0.25	0	0.25	0	0.26	0.26	0	0	0	0	0	0	0	2	3	2	0	2	0	3	4	0	0	0	0	0
312	Ig lambda chain V-I region WAH OS=Homo sapiens PE=1 SV=1	LV106_HUMAN	12	6.46	Homo sapiens	0	3	2	0	0	0	2	3	3	0	0	2	0	3	2	0	0.24	0.24	0	0	0	0.24	0.24	0.24	0	0	0.22	0	0.22	0.22	0	2	2	0	0	0	2	2	2	0	0	2	0	2
313	Ig lambda chain V-III region SH OS=Homo sapiens PE=1 SV=1	LV301_HUMAN	11	6.5	Homo sapiens	0	0	0	0	0	0	0	0	0	0	2	3	2	3	0	0	0	0	0	0	0	0	0	0	0	0.25	0.25	0.25	0.32	0	0	0	0	0	0	0	0	0	0	0	2	2	2	3
314	Alpha-amylase 1 OS=Homo sapiens GN=AMY1A PE=1 SV=2	AMY1_HUMAN	58	6.92	Homo sapiens	0	0	0	0	0	0	0	0	0	0	0	0	0	0	0	0	0	0	0	0	0	0	0	0	0	0	0	0	0	0	0	0	0	0	0	0	0	0	0	0	0	0	0	0
315	Coagulation factor XIII B chain OS=Homo sapiens GN=F13B PE=1 SV=3	F13B_HUMAN	76	6.36	Homo sapiens	0	0	0	0	0	0	0	0	0	0	0	0	0	0	0	0	0	0	0	0	0	0	0	0	0	0	0	0	0	0	0	0	0	0	0	0	0	0	0	0	0	0	0	0
316	Coronin-1A OS=Homo sapiens GN=CORO1A PE=1 SV=4	COR1A_HUMAN	51	6.67	Homo sapiens	3	3	3	3	2	2	2	0	0	0	0	0	0	0	0	0.076	0.076	0.076	0.059	0.041	0.041	0.041	0	0	0	0	0	0	0	0	3	3	3	3	2	2	2	0	0	0	0	0	0	0
317	Myosin regulatory light chain 12A OS=Homo sapiens GN=MYL12A PE=1 SV=2	ML12A_HUMAN	20	4.4	Homo sapiens	6	7	6	6	4	6	4	5	5	0	0	0	0	0	0	0.29	0.35	0.4	0.35	0.35	0.35	0.24	0.24	0.24	0	0	0	0	0	0	2	2	2	2	2	3	2	2	2	0	0	0	0	0
318	ATP synthase subunit O, mitochondrial OS=Homo sapiens GN=ATP5O PE=1 SV=1	ATPO_HUMAN	23	10.61	Homo sapiens	4	3	3	2	0	4	2	4	4	0	0	0	0	0	0	0.26	0.17	0.15	0.1	0	0.22	0.11	0.24	0.21	0	0	0	0	0	0	4	3	3	2	0	4	2	4	4	0	0	0	0	0
319	Protein disulfide-isomerase A6 OS=Homo sapiens GN=PDIA6 PE=1 SV=1	PDIA6_HUMAN	48	4.7	Homo sapiens	4	3	5	5	4	4	5	4	5	0	0	0	0	0	0	0.086	0.086	0.12	0.12	0.086	0.086	0.12	0.12	0.12	0	0	0	0	0	0	4	3	5	5	4	4	5	4	5	0	0	0	0	0
320	Myeloperoxidase OS=Homo sapiens GN=MPO PE=1 SV=1	PERM_HUMAN	84	9.14	Homo sapiens	0	0	0	0	0	0	0	0	0	0	0	0	0	0	0	0	0	0	0	0	0	0	0	0	0	0	0	0	0	0	0	0	0	0	0	0	0	0	0	0	0	0	0	0
321	Catalase OS=Homo sapiens GN=CAT PE=1 SV=3	CATA_HUMAN	60	7.41	Homo sapiens	3	3	3	2	2	2	0	2	2	0	0	0	0	0	0	0.068	0.068	0.068	0.047	0.047	0.047	0	0.047	0.047	0	0	0	0	0	0	3	3	3	2	2	2	0	2	2	0	0	0	0	0
322	14-3-3 protein theta OS=Homo sapiens GN=YWHAQ PE=1 SV=1	1433T_HUMAN	28	4.41	Homo sapiens	4	5	9	3	3	0	4	0	4	0	0	0	0	0	0	0.2	0.2	0.35	0.13	0.12	0	0.17	0	0.19	0	0	0	0	0	0	3	2	6	2	3	0	2	0	2	0	0	0	0	0
323	CD59 glycoprotein OS=Homo sapiens GN=CD59 PE=1 SV=1	CD59_HUMAN	14	6.47	Homo sapiens	0	0	0	0	0	0	0	0	0	0	0	0	0	0	0	0	0	0	0	0	0	0	0	0	0	0	0	0	0	0	0	0	0	0	0	0	0	0	0	0	0	0	0	0
324	Voltage-dependent anion-selective channel protein 1 OS=Homo sapiens GN=VDAC1 PE=1 SV=2	VDAC1_HUMAN	31	8.89	Homo sapiens	6	6	6	4	2	3	4	3	0	0	0	0	0	0	0	0.18	0.22	0.19	0.2	0.088	0.12	0.15	0.1	0	0	0	0	0	0	0	3	4	4	4	2	2	3	2	0	0	0	0	0	0
325	Transitional endoplasmic reticulum ATPase OS=Homo sapiens GN=VCP PE=1 SV=4	TERA_HUMAN	89	4.89	Homo sapiens	4	3	5	4	0	2	2	3	2	0	0	0	0	0	0	0.056	0.051	0.076	0.073	0	0.041	0.041	0.051	0.036	0	0	0	0	0	0	4	3	5	4	0	2	2	3	2	0	0	0	0	0
326	Sex hormone-binding globulin OS=Homo sapiens GN=SHBG PE=1 SV=2	SHBG_HUMAN	44	6.7	Homo sapiens	0	0	0	0	0	0	0	0	0	4	0	0	0	0	4	0	0	0	0	0	0	0	0	0	0.11	0	0	0	0	0.17	0	0	0	0	0	0	0	0	0	3	0	0	0	0
327	Calreticulin OS=Homo sapiens GN=CALR PE=1 SV=1	CALR_HUMAN	48	4.04	Homo sapiens	3	4	4	0	0	2	2	2	0	0	0	0	0	0	0	0.098	0.12	0.13	0	0	0.086	0.06	0.065	0	0	0	0	0	0	0	3	4	4	0	0	2	2	2	0	0	0	0	0	0
328	Proline-serine-threonine phosphatase-interacting protein 2 OS=Homo sapiens GN=PSTPIP2 PE=1 SV=4	PPIP2_HUMAN	39	8.68	Homo sapiens	3	4	5	0	0	2	2	3	2	0	0	0	0	0	0	0.099	0.14	0.16	0	0	0.069	0.072	0.11	0.078	0	0	0	0	0	0	3	4	5	0	0	2	2	3	2	0	0	0	0	0
329	Ras-related C3 botulinum toxin substrate 1 OS=Homo sapiens GN=RAC1 PE=1 SV=1	RAC1_HUMAN	21	8.65	Homo sapiens	0	3	3	0	2	2	0	0	2	0	0	0	0	0	0	0	0.17	0.17	0	0.11	0.11	0	0	0.11	0	0	0	0	0	0	0	3	3	0	2	2	0	0	2	0	0	0	0	0
330	Protein unc-13 homolog D OS=Homo sapiens GN=UNC13D PE=1 SV=1	UN13D_HUMAN	123	6.64	Homo sapiens	0	3	4	4	3	2	4	2	5	0	0	0	0	0	0	0	0.043	0.043	0.034	0.025	0.018	0.044	0.018	0.048	0	0	0	0	0	0	0	3	4	4	3	2	4	2	5	0	0	0	0	0
331	Ras-related protein Rab-1B OS=Homo sapiens GN=RAB1B PE=1 SV=1	RAB1B_HUMAN	22	5.38	Homo sapiens	3	6	4	4	3	3	2	0	4	0	0	0	0	0	0	0.21	0.3	0.25	0.23	0.22	0.15	0.14	0	0.17	0	0	0	0	0	0	2	5	3	3	2	2	2	0	2	0	0	0	0	0
332	Ficolin-2 OS=Homo sapiens GN=FCN2 PE=1 SV=2	FCN2_HUMAN	34	6.77	Homo sapiens	0	0	0	0	0	0	0	0	0	5	8	8	6	4	6	0	0	0	0	0	0	0	0	0	0.18	0.25	0.24	0.22	0.15	0.22	0	0	0	0	0	0	0	0	0	4	6	5	5	3
333	Glutathione peroxidase 1 OS=Homo sapiens GN=GPX1 PE=1 SV=4	GPX1_HUMAN	22	6.51	Homo sapiens	4	4	4	5	5	4	4	2	4	0	0	0	0	0	0	0.3	0.3	0.26	0.34	0.3	0.3	0.3	0.14	0.26	0	0	0	0	0	0	4	4	4	5	4	4	4	2	4	0	0	0	0	0
334	Calmodulin-like protein 5 OS=Homo sapiens GN=CALML5 PE=1 SV=2	CALL5_HUMAN	16	4.05	Homo sapiens	0	0	0	0	0	0	2	0	0	0	0	0	0	0	0	0	0	0	0	0	0	0.15	0	0	0	0	0	0	0	0	0	0	0	0	0	0	2	0	0	0	0	0	0	0
335	Bridging integrator 2 OS=Homo sapiens GN=BIN2 PE=1 SV=3	BIN2_HUMAN	62	4.82	Homo sapiens	0	0	0	0	0	0	0	0	0	0	0	0	0	0	0	0	0	0	0	0	0	0	0	0	0	0	0	0	0	0	0	0	0	0	0	0	0	0	0	0	0	0	0	0
336	Carboxypeptidase N subunit 2 OS=Homo sapiens GN=CPN2 PE=1 SV=3	CPN2_HUMAN	61	5.89	Homo sapiens	0	0	0	2	0	0	0	0	0	2	0	3	4	4	4	0	0	0	0.079	0	0	0	0	0	0.088	0	0.084	0.14	0.14	0.13	0	0	0	2	0	0	0	0	0	2	0	3	4	4
337	Prenylcysteine oxidase 1 OS=Homo sapiens GN=PCYOX1 PE=1 SV=3	PCYOX_HUMAN	57	6.1	Homo sapiens	0	0	0	0	0	0	0	0	0	4	3	4	5	7	7	0	0	0	0	0	0	0	0	0	0.12	0.1	0.13	0.16	0.2	0.2	0	0	0	0	0	0	0	0	0	4	3	4	5	7
338	NAD(P) transhydrogenase, mitochondrial OS=Homo sapiens GN=NNT PE=1 SV=3	NNTM_HUMAN	114	8.21	Homo sapiens	3	3	2	2	3	3	2	2	3	0	0	0	0	0	0	0.034	0.045	0.024	0.024	0.034	0.034	0.024	0.035	0.045	0	0	0	0	0	0	3	3	2	2	3	3	2	2	3	0	0	0	0	0
339	Actin-related protein 2/3 complex subunit 2 OS=Homo sapiens GN=ARPC2 PE=1 SV=1	ARPC2_HUMAN	34	7.4	Homo sapiens	0	0	0	0	0	0	0	2	2	0	0	0	0	0	0	0	0	0	0	0	0	0	0.063	0.063	0	0	0	0	0	0	0	0	0	0	0	0	0	2	2	0	0	0	0	0
340	Protein kinase C beta type OS=Homo sapiens GN=PRKCB PE=1 SV=4	KPCB_HUMAN	77	7	Homo sapiens	5	3	4	4	3	4	3	7	6	0	0	0	0	0	0	0.085	0.07	0.085	0.082	0.055	0.085	0.043	0.12	0.1	0	0	0	0	0	0	4	3	4	4	3	4	3	7	6	0	0	0	0	0
341	Prolactin-inducible protein OS=Homo sapiens GN=PIP PE=1 SV=1	PIP_HUMAN	17	8.18	Homo sapiens	0	0	0	0	0	0	0	0	0	0	0	0	0	0	0	0	0	0	0	0	0	0	0	0	0	0	0	0	0	0	0	0	0	0	0	0	0	0	0	0	0	0	0	0
342	Elongation factor 1-alpha 1 OS=Homo sapiens GN=EEF1A1 PE=1 SV=1	EF1A1_HUMAN (+1)	50	9.5	Homo sapiens	3	3	3	0	0	0	0	0	2	0	0	0	0	0	2	0.067	0.071	0.071	0	0	0	0	0	0.043	0	0	0	0	0	0.043	3	3	3	0	0	0	0	0	2	0	0	0	0	0
343	Insulin-like growth factor-binding protein 3 OS=Homo sapiens GN=IGFBP3 PE=1 SV=2	IBP3_HUMAN	32	8.78	Homo sapiens	0	2	3	2	2	4	0	2	0	0	0	0	0	0	0	0	0.072	0.1	0.076	0.072	0.14	0	0.062	0	0	0	0	0	0	0	0	2	3	2	2	4	0	2	0	0	0	0	0	0
344	NADH-cytochrome b5 reductase 3 OS=Homo sapiens GN=CYB5R3 PE=1 SV=3	NB5R3_HUMAN	34	7.68	Homo sapiens	0	3	2	2	0	0	0	0	0	0	0	0	0	0	0	0	0.15	0.17	0.1	0	0	0	0	0	0	0	0	0	0	0	0	3	2	2	0	0	0	0	0	0	0	0	0	0
345	Cytochrome b-c1 complex subunit 1, mitochondrial OS=Homo sapiens GN=UQCRC1 PE=1 SV=3	QCR1_HUMAN	53	6.32	Homo sapiens	4	4	4	4	3	3	4	4	3	0	0	0	0	0	0	0.1	0.1	0.12	0.14	0.085	0.085	0.14	0.12	0.092	0	0	0	0	0	0	4	4	4	4	3	3	4	4	3	0	0	0	0	0
346	Cytoplasmic FMR1-interacting protein 1 OS=Homo sapiens GN=CYFIP1 PE=1 SV=1	CYFP1_HUMAN	145	6.9	Homo sapiens	0	0	2	0	0	2	3	2	3	0	0	0	0	0	0	0	0	0.026	0	0	0.018	0.028	0.019	0.039	0	0	0	0	0	0	0	0	2	0	0	2	3	2	3	0	0	0	0	0
347	Tubulin beta-4B chain OS=Homo sapiens GN=TUBB4B PE=1 SV=1	TBB4B_HUMAN	50	4.52	Homo sapiens	23	25	26	21	20	17	0	19	23	0	0	0	0	0	0	0.39	0.46	0.53	0.42	0.4	0.41	0	0.44	0.46	0	0	0	0	0	0	2	3	3	3	2	3	0	2	3	0	0	0	0	0
348	ADP-ribosylation factor 1 OS=Homo sapiens GN=ARF1 PE=1 SV=2	ARF1_HUMAN (+1)	21	6.8	Homo sapiens	2	0	2	0	0	0	0	0	0	0	0	0	0	0	0	0.23	0	0.23	0	0	0	0	0	0	0	0	0	0	0	0	2	0	2	0	0	0	0	0	0	0	0	0	0	0
349	Ras-related protein Rab-7a OS=Homo sapiens GN=RAB7A PE=1 SV=1	RAB7A_HUMAN	23	6.59	Homo sapiens	4	4	5	4	3	3	0	0	0	0	0	0	0	0	0	0.21	0.21	0.27	0.21	0.16	0.17	0	0	0	0	0	0	0	0	0	4	4	5	4	3	3	0	0	0	0	0	0	0	0
350	Nexilin OS=Homo sapiens GN=NEXN PE=1 SV=1	NEXN_HUMAN	81	4.99	Homo sapiens	2	3	3	3	3	4	4	2	3	0	0	0	0	0	0	0.039	0.076	0.039	0.058	0.059	0.061	0.076	0.022	0.039	0	0	0	0	0	0	2	3	3	3	3	4	4	2	3	0	0	0	0	0
351	Ras-related protein Rab-10 OS=Homo sapiens GN=RAB10 PE=1 SV=1	RAB10_HUMAN	23	8.61	Homo sapiens	0	0	0	3	0	0	0	0	0	0	0	0	0	0	0	0	0	0	0.18	0	0	0	0	0	0	0	0	0	0	0	0	0	0	2	0	0	0	0	0	0	0	0	0	0
352	F-actin-capping protein subunit alpha-1 OS=Homo sapiens GN=CAPZA1 PE=1 SV=3	CAZA1_HUMAN	33	5.42	Homo sapiens	3	2	2	2	0	0	0	0	0	0	0	0	0	0	0	0.15	0.087	0.17	0.087	0	0	0	0	0	0	0	0	0	0	0	3	2	2	2	0	0	0	0	0	0	0	0	0	0
353	Phosphate carrier protein, mitochondrial OS=Homo sapiens GN=SLC25A3 PE=1 SV=2	MPCP_HUMAN	40	9.79	Homo sapiens	0	0	0	2	0	0	0	0	0	0	0	0	0	0	0	0	0	0	0.028	0	0	0	0	0	0	0	0	0	0	0	0	0	0	2	0	0	0	0	0	0	0	0	0	0
354	Transforming growth factor beta-1 OS=Homo sapiens GN=TGFB1 PE=1 SV=2	TGFB1_HUMAN	44	8.63	Homo sapiens	4	5	2	4	4	5	3	3	3	0	0	0	0	0	0	0.14	0.19	0.082	0.11	0.11	0.13	0.095	0.085	0.095	0	0	0	0	0	0	4	5	2	4	4	5	3	3	3	0	0	0	0	0
355	Protein G6b OS=Homo sapiens GN=G6B PE=1 SV=1	G6B_HUMAN	26	10.08	Homo sapiens	3	0	0	0	0	0	2	2	2	0	0	0	0	0	0	0.14	0	0	0	0	0	0.083	0.1	0.1	0	0	0	0	0	0	3	0	0	0	0	0	2	2	2	0	0	0	0	0
356	Elongation factor Tu, mitochondrial OS=Homo sapiens GN=TUFM PE=1 SV=2	EFTU_HUMAN	50	7.68	Homo sapiens	2	3	0	2	0	2	0	0	0	0	0	0	0	0	0	0.049	0.077	0	0.058	0	0.046	0	0	0	0	0	0	0	0	0	2	3	0	2	0	2	0	0	0	0	0	0	0	0
357	Four and a half LIM domains protein 1 OS=Homo sapiens GN=FHL1 PE=1 SV=4	FHL1_HUMAN	36	9.15	Homo sapiens	2	2	2	0	0	0	0	0	0	0	0	0	0	0	0	0.08	0.08	0.08	0	0	0	0	0	0	0	0	0	0	0	0	2	2	2	0	0	0	0	0	0	0	0	0	0	0
358	Synaptotagmin-like protein 4 OS=Homo sapiens GN=SYTL4 PE=1 SV=2	SYTL4_HUMAN	76	9.42	Homo sapiens	3	3	0	0	0	2	0	2	2	2	0	0	0	0	0	0.031	0.027	0	0	0	0.045	0	0.028	0.025	0.015	0	0	0	0	0	2	2	0	0	0	2	0	2	2	2	0	0	0	0
359	Calmodulin OS=Homo sapiens GN=CALM1 PE=1 SV=2	CALM_HUMAN	17	3.84	Homo sapiens	3	4	4	0	0	0	3	3	0	0	0	0	0	0	0	0.21	0.21	0.19	0	0	0	0.21	0.21	0	0	0	0	0	0	0	3	3	2	0	0	0	2	2	0	0	0	0	0	0
360	Phosphatidylinositol-glycan-specific phospholipase D OS=Homo sapiens GN=GPLD1 PE=1 SV=3	PHLD_HUMAN	92	6.33	Homo sapiens	0	0	0	0	0	0	0	0	0	0	2	2	2	2	4	0	0	0	0	0	0	0	0	0	0	0.026	0.026	0.021	0.024	0.058	0	0	0	0	0	0	0	0	0	0	2	2	2	2
361	Calpain-1 catalytic subunit OS=Homo sapiens GN=CAPN1 PE=1 SV=1	CAN1_HUMAN	82	5.35	Homo sapiens	4	4	6	4	4	6	2	3	3	0	0	0	0	0	0	0.056	0.059	0.077	0.055	0.06	0.085	0.039	0.046	0.046	0	0	0	0	0	0	4	4	6	4	4	6	2	3	3	0	0	0	0	0
362	Keratinocyte proline-rich protein OS=Homo sapiens GN=KPRP PE=1 SV=1	KPRP_HUMAN	64	8.29	Homo sapiens	0	0	0	0	0	0	0	0	0	0	0	0	0	2	0	0	0	0	0	0	0	0	0	0	0	0	0	0	0.036	0	0	0	0	0	0	0	0	0	0	0	0	0	0	2
363	Cell division control protein 42 homolog OS=Homo sapiens GN=CDC42 PE=1 SV=2	CDC42_HUMAN	21	6.51	Homo sapiens	0	3	0	3	0	0	0	0	4	0	0	0	0	0	0	0	0.22	0	0.22	0	0	0	0	0.29	0	0	0	0	0	0	0	2	0	2	0	0	0	0	3	0	0	0	0	0
364	Synaptosomal-associated protein 23 OS=Homo sapiens GN=SNAP23 PE=1 SV=1	SNP23_HUMAN	23	4.62	Homo sapiens	2	0	2	0	2	0	2	2	2	0	0	0	0	0	0	0.13	0	0.13	0	0.14	0	0.15	0.15	0.15	0	0	0	0	0	0	2	0	2	0	2	0	2	2	2	0	0	0	0	0
365	10 kDa heat shock protein, mitochondrial OS=Homo sapiens GN=HSPE1 PE=1 SV=2	CH10_HUMAN	11	9.49	Homo sapiens	0	0	0	0	0	0	0	0	0	0	0	0	0	0	0	0	0	0	0	0	0	0	0	0	0	0	0	0	0	0	0	0	0	0	0	0	0	0	0	0	0	0	0	0
366	Carnitine O-palmitoyltransferase 1, liver isoform OS=Homo sapiens GN=CPT1A PE=1 SV=2	CPT1A_HUMAN	88	8.84	Homo sapiens	2	2	5	3	4	3	3	2	3	0	0	0	0	0	0	0.034	0.034	0.085	0.048	0.066	0.05	0.052	0.034	0.048	0	0	0	0	0	0	2	2	5	3	4	3	3	2	3	0	0	0	0	0
367	Thioredoxin-dependent peroxide reductase, mitochondrial OS=Homo sapiens GN=PRDX3 PE=1 SV=3	PRDX3_HUMAN	28	7.88	Homo sapiens	0	3	2	2	0	0	2	2	2	0	0	0	0	0	0	0	0.16	0.13	0.1	0	0	0.074	0.1	0.13	0	0	0	0	0	0	0	3	2	2	0	0	2	2	2	0	0	0	0	0
368	Peroxiredoxin-6 OS=Homo sapiens GN=PRDX6 PE=1 SV=3	PRDX6_HUMAN	25	6.29	Homo sapiens	0	0	3	3	4	4	0	0	0	0	0	0	0	2	2	0	0	0.17	0.23	0.23	0.23	0	0	0	0	0	0	0	0.11	0.11	0	0	2	3	4	3	0	0	0	0	0	0	0	2
369	Extracellular matrix protein 1 OS=Homo sapiens GN=ECM1 PE=1 SV=2	ECM1_HUMAN	61	6.7	Homo sapiens	0	0	0	0	0	0	0	0	0	0	0	0	2	0	2	0	0	0	0	0	0	0	0	0	0	0	0	0.054	0	0.046	0	0	0	0	0	0	0	0	0	0	0	0	2	0
370	Fetuin-B OS=Homo sapiens GN=FETUB PE=1 SV=2	FETUB_HUMAN	42	6.83	Homo sapiens	0	0	0	0	0	0	2	0	0	2	3	5	4	5	4	0	0	0	0	0	0	0.055	0	0	0.042	0.094	0.15	0.12	0.15	0.12	0	0	0	0	0	0	2	0	0	2	3	5	4	5
371	Guanine nucleotide-binding protein G(I)/G(S)/G(O) subunit gamma-5 OS=Homo sapiens GN=GNG5 PE=1 SV=3	GBG5_HUMAN	7	10.62	Homo sapiens	2	2	2	2	0	2	0	0	0	0	0	0	0	0	0	0.29	0.29	0.29	0.32	0	0.29	0	0	0	0	0	0	0	0	0	2	2	2	2	0	2	0	0	0	0	0	0	0	0
372	C-reactive protein OS=Homo sapiens GN=CRP PE=1 SV=1	CRP_HUMAN	25	5.32	Homo sapiens	0	0	0	0	0	0	2	0	0	0	0	0	0	0	0	0	0	0	0	0	0	0.076	0	0	0	0	0	0	0	0	0	0	0	0	0	0	2	0	0	0	0	0	0	0
373	Adipocyte plasma membrane-associated protein OS=Homo sapiens GN=APMAP PE=1 SV=2	APMAP_HUMAN	46	6.02	Homo sapiens	0	0	0	0	0	0	0	0	0	0	0	0	0	0	0	0	0	0	0	0	0	0	0	0	0	0	0	0	0	0	0	0	0	0	0	0	0	0	0	0	0	0	0	0
374	Malectin OS=Homo sapiens GN=MLEC PE=1 SV=1	MLEC_HUMAN	32	5.09	Homo sapiens	3	3	4	3	4	0	0	0	3	0	0	0	0	0	0	0.11	0.1	0.15	0.14	0.14	0	0	0	0.1	0	0	0	0	0	0	3	3	4	3	3	0	0	0	3	0	0	0	0	0
375	Actin-related protein 2/3 complex subunit 4 OS=Homo sapiens GN=ARPC4 PE=1 SV=3	ARPC4_HUMAN	20	8.71	Homo sapiens	2	2	0	2	2	0	2	0	0	0	0	0	0	0	0	0.11	0.18	0	0.13	0.14	0	0.12	0	0	0	0	0	0	0	0	2	2	0	2	2	0	2	0	0	0	0	0	0	0
376	Rho-associated protein kinase 2 OS=Homo sapiens GN=ROCK2 PE=1 SV=4	ROCK2_HUMAN	161	5.84	Homo sapiens	3	4	3	2	3	2	2	3	0	0	0	0	0	0	0	0.025	0.035	0.029	0.022	0.032	0.022	0.022	0.029	0	0	0	0	0	0	0	3	4	3	2	3	2	2	3	0	0	0	0	0	0
377	Desmocollin-1 OS=Homo sapiens GN=DSC1 PE=1 SV=2	DSC1_HUMAN	100	5.08	Homo sapiens	0	0	0	0	0	0	0	0	0	0	0	2	0	0	0	0	0	0	0	0	0	0	0	0	0	0	0.032	0	0	0	0	0	0	0	0	0	0	0	0	0	0	2	0	0
378	Ig lambda chain V-IV region Hil OS=Homo sapiens PE=1 SV=1	LV403_HUMAN	12	6.45	Homo sapiens	0	0	0	0	0	0	0	0	0	0	0	2	2	0	0	0	0	0	0	0	0	0	0	0	0	0	0.28	0.28	0	0	0	0	0	0	0	0	0	0	0	0	0	2	2	0
379	Electron transfer flavoprotein subunit alpha, mitochondrial OS=Homo sapiens GN=ETFA PE=1 SV=1	ETFA_HUMAN	35	8.57	Homo sapiens	3	2	5	4	2	4	5	5	4	0	0	0	0	0	0	0.15	0.09	0.28	0.23	0.096	0.23	0.28	0.28	0.23	0	0	0	0	0	0	3	2	5	4	2	4	5	5	4	0	0	0	0	0
380	Stromal interaction molecule 1 OS=Homo sapiens GN=STIM1 PE=1 SV=3	STIM1_HUMAN	77	6.65	Homo sapiens	0	0	0	0	2	0	0	3	0	0	0	0	0	0	0	0	0	0	0	0.055	0	0	0.07	0	0	0	0	0	0	0	0	0	0	0	2	0	0	3	0	0	0	0	0	0
381	Annexin A2 OS=Homo sapiens GN=ANXA2 PE=1 SV=2	ANXA2_HUMAN	39	7.91	Homo sapiens	2	2	0	2	0	0	0	0	0	2	2	0	0	0	0	0.062	0.062	0	0.056	0	0	0	0	0	0.062	0.062	0	0	0	0	2	2	0	2	0	0	0	0	0	2	2	0	0	0
382	Coagulation factor VIII OS=Homo sapiens GN=F8 PE=1 SV=1	FA8_HUMAN	267	7.37	Homo sapiens	0	0	0	0	0	0	0	0	0	0	0	0	0	0	0	0	0	0	0	0	0	0	0	0	0	0	0	0	0	0	0	0	0	0	0	0	0	0	0	0	0	0	0	0
383	Tropomodulin-3 OS=Homo sapiens GN=TMOD3 PE=1 SV=1	TMOD3_HUMAN	40	4.83	Homo sapiens	3	2	2	2	2	0	0	4	4	0	0	0	0	0	0	0.091	0.054	0.068	0.051	0.06	0	0	0.12	0.12	0	0	0	0	0	0	3	2	2	2	2	0	0	4	4	0	0	0	0	0
384	Cysteine and glycine-rich protein 1 OS=Homo sapiens GN=CSRP1 PE=1 SV=3	CSRP1_HUMAN	21	8.68	Homo sapiens	2	3	2	3	2	4	4	3	4	0	0	0	0	0	0	0.18	0.27	0.18	0.26	0.17	0.26	0.35	0.23	0.32	0	0	0	0	0	0	2	3	2	3	2	3	4	3	4	0	0	0	0	0
385	Trifunctional enzyme subunit beta, mitochondrial OS=Homo sapiens GN=HADHB PE=1 SV=3	ECHB_HUMAN	51	9.94	Homo sapiens	4	4	2	2	4	3	2	3	2	0	0	0	0	0	0	0.099	0.097	0.038	0.061	0.12	0.1	0.061	0.08	0.038	0	0	0	0	0	0	4	4	2	2	4	3	2	3	2	0	0	0	0	0
386	Actin-related protein 2/3 complex subunit 3 OS=Homo sapiens GN=ARPC3 PE=1 SV=3	ARPC3_HUMAN	21	8.83	Homo sapiens	0	2	2	2	0	0	0	0	0	0	0	0	0	0	0	0	0.13	0.13	0.13	0	0	0	0	0	0	0	0	0	0	0	0	2	2	2	0	0	0	0	0	0	0	0	0	0
387	Delta(3,5)-Delta(2,4)-dienoyl-CoA isomerase, mitochondrial OS=Homo sapiens GN=ECH1 PE=1 SV=2	ECH1_HUMAN	36	8.12	Homo sapiens	0	2	2	3	0	3	4	2	2	0	0	0	0	0	0	0	0.058	0.079	0.11	0	0.11	0.11	0.085	0.085	0	0	0	0	0	0	0	2	2	3	0	3	3	2	2	0	0	0	0	0
388	Secreted phosphoprotein 24 OS=Homo sapiens GN=SPP2 PE=1 SV=1	SPP24_HUMAN	24	8.46	Homo sapiens	0	0	0	0	0	0	0	0	0	3	3	0	0	0	0	0	0	0	0	0	0	0	0	0	0.16	0.12	0	0	0	0	0	0	0	0	0	0	0	0	0	3	2	0	0	0
389	Flotillin-1 OS=Homo sapiens GN=FLOT1 PE=1 SV=3	FLOT1_HUMAN	47	7.58	Homo sapiens	2	2	3	0	0	0	2	2	0	0	0	0	0	0	0	0.042	0.066	0.075	0	0	0	0.075	0.066	0	0	0	0	0	0	0	2	2	3	0	0	0	2	2	0	0	0	0	0	0
390	Ig kappa chain V-I region HK102 (Fragment) OS=Homo sapiens GN=IGKV1-5 PE=4 SV=1	KV110_HUMAN	13	8.46	Homo sapiens	0	0	3	0	3	2	0	0	3	0	0	0	0	0	0	0	0	0.32	0	0.43	0.25	0	0	0.33	0	0	0	0	0	0	0	0	3	0	3	2	0	0	2	0	0	0	0	0
391	Heparanase OS=Homo sapiens GN=HPSE PE=1 SV=2	HPSE_HUMAN	61	9.71	Homo sapiens	2	3	3	2	0	0	3	2	0	0	0	0	0	0	0	0.033	0.068	0.068	0.037	0	0	0.055	0.037	0	0	0	0	0	0	0	2	3	3	2	0	0	3	2	0	0	0	0	0	0
392	Trem-like transcript 1 protein OS=Homo sapiens GN=TREML1 PE=1 SV=2	TRML1_HUMAN	33	5.95	Homo sapiens	3	4	2	0	3	0	0	0	0	0	0	0	0	0	0	0.15	0.17	0.15	0	0.15	0	0	0	0	0	0	0	0	0	0	2	3	2	0	2	0	0	0	0	0	0	0	0	0
393	Kinesin-like protein KIF2A OS=Homo sapiens GN=KIF2A PE=1 SV=3	KIF2A_HUMAN	80	6.66	Homo sapiens	2	2	0	2	0	2	2	4	3	0	0	0	0	0	0	0.037	0.037	0	0.037	0	0.037	0.037	0.071	0.052	0	0	0	0	0	0	2	2	0	2	0	2	2	4	3	0	0	0	0	0
394	Polymeric immunoglobulin receptor OS=Homo sapiens GN=PIGR PE=1 SV=4	PIGR_HUMAN	83	5.43	Homo sapiens	0	0	0	0	0	0	0	0	0	0	0	0	0	0	0	0	0	0	0	0	0	0	0	0	0	0	0	0	0	0	0	0	0	0	0	0	0	0	0	0	0	0	0	0
395	Drebrin OS=Homo sapiens GN=DBN1 PE=1 SV=4	DREB_HUMAN	71	4.1	Homo sapiens	0	0	3	0	0	0	0	0	0	0	0	0	0	0	0	0	0	0.08	0	0	0	0	0	0	0	0	0	0	0	0	0	0	3	0	0	0	0	0	0	0	0	0	0	0
396	Poly(rC)-binding protein 1 OS=Homo sapiens GN=PCBP1 PE=1 SV=2	PCBP1_HUMAN	37	7.11	Homo sapiens	0	2	2	2	2	0	2	0	0	0	0	0	0	0	0	0	0.056	0.056	0.056	0.056	0	0.056	0	0	0	0	0	0	0	0	0	2	2	2	2	0	2	0	0	0	0	0	0	0
397	14-3-3 protein beta/alpha OS=Homo sapiens GN=YWHAB PE=1 SV=3	1433B_HUMAN	28	4.47	Homo sapiens	6	5	6	4	4	0	0	5	7	0	0	0	0	0	0	0.21	0.17	0.17	0.22	0.21	0	0	0.26	0.32	0	0	0	0	0	0	2	2	2	3	3	0	0	2	3	0	0	0	0	0
398	Extended synaptotagmin-1 OS=Homo sapiens GN=ESYT1 PE=1 SV=1	ESYT1_HUMAN	123	5.61	Homo sapiens	0	0	2	2	3	4	0	0	2	0	0	0	0	0	0	0	0	0.024	0.019	0.031	0.041	0	0	0.024	0	0	0	0	0	0	0	0	2	2	3	4	0	0	2	0	0	0	0	0
399	ATP synthase F(0) complex subunit B1, mitochondrial OS=Homo sapiens GN=ATP5F1 PE=1 SV=2	AT5F1_HUMAN	29	9.79	Homo sapiens	0	0	0	2	0	2	2	0	0	0	0	0	0	0	0	0	0	0	0.16	0	0.16	0.16	0	0	0	0	0	0	0	0	0	0	0	2	0	2	2	0	0	0	0	0	0	0
400	Heat shock 70 kDa protein 1A/1B OS=Homo sapiens GN=HSPA1A PE=1 SV=5	HSP71_HUMAN	70	5.47	Homo sapiens	0	3	4	5	0	0	5	6	5	0	0	0	0	0	0	0	0	0	0	0	0	0	0	0	0	0	0	0	0	0	0	2	2	2	0	0	2	3	2	0	0	0	0	0
401	Ig kappa chain V-III region CLL OS=Homo sapiens PE=4 SV=2	KV308_HUMAN	14	8.7	Homo sapiens	0	0	0	0	0	0	0	0	0	0	0	2	0	0	0	0	0	0	0	0	0	0	0	0	0	0	0.19	0	0	0	0	0	0	0	0	0	0	0	0	0	0	2	0	0
402	Beta-2-µglobulin OS=Homo sapiens GN=B2M PE=1 SV=1	B2MG_HUMAN	14	6.51	Homo sapiens	0	2	2	0	2	0	2	2	0	0	0	0	0	0	0	0	0.27	0.29	0	0.29	0	0.29	0.29	0	0	0	0	0	0	0	0	2	2	0	2	0	2	2	0	0	0	0	0	0
403	Protein S100-A4 OS=Homo sapiens GN=S100A4 PE=1 SV=1	S10A4_HUMAN	12	5.92	Homo sapiens	0	0	0	3	3	3	3	0	0	0	0	0	0	0	0	0	0	0	0.2	0.2	0.2	0.29	0	0	0	0	0	0	0	0	0	0	0	2	2	2	3	0	0	0	0	0	0	0
404	Trifunctional enzyme subunit alpha, mitochondrial OS=Homo sapiens GN=HADHA PE=1 SV=2	ECHA_HUMAN	83	9.52	Homo sapiens	0	3	2	0	2	2	3	0	0	0	0	0	0	0	0	0	0.06	0.037	0	0.037	0.029	0.059	0	0	0	0	0	0	0	0	0	3	2	0	2	2	3	0	0	0	0	0	0	0
405	Keratin, type II cuticular Hb5 OS=Homo sapiens GN=KRT85 PE=1 SV=1	KRT85_HUMAN	56	6.49	Homo sapiens	0	0	0	0	0	0	0	0	0	0	0	0	0	0	0	0	0	0	0	0	0	0	0	0	0	0	0	0	0	0	0	0	0	0	0	0	0	0	0	0	0	0	0	0
406	Arachidonate 12-lipoxygenase, 12S-type OS=Homo sapiens GN=ALOX12 PE=1 SV=4	LOX12_HUMAN	76	6.15	Homo sapiens	2	4	4	2	0	2	2	0	0	0	0	0	0	0	0	0.038	0.081	0.078	0.038	0	0.03	0.038	0	0	0	0	0	0	0	0	2	4	4	2	0	2	2	0	0	0	0	0	0	0
407	Protein diaphanous homolog 1 OS=Homo sapiens GN=DIAPH1 PE=1 SV=2	DIAP1_HUMAN	141	5.07	Homo sapiens	3	3	3	3	2	3	2	2	0	0	0	0	0	0	0	0.024	0.019	0.028	0.03	0.018	0.03	0.018	0.018	0	0	0	0	0	0	0	3	3	3	3	2	3	2	2	0	0	0	0	0	0
408	Keratin, type II cytoskeletal 78 OS=Homo sapiens GN=KRT78 PE=2 SV=2	K2C78_HUMAN	57	5.83	Homo sapiens	0	0	0	0	0	0	0	0	0	0	5	0	0	0	0	0	0	0	0	0	0	0	0	0	0	0.094	0	0	0	0	0	0	0	0	0	0	0	0	0	0	2	0	0	0
409	Histone H3.2 OS=Homo sapiens GN=HIST2H3A PE=1 SV=3	H32_HUMAN	15	11.83	Homo sapiens	0	0	0	0	0	0	0	0	0	0	0	0	0	0	0	0	0	0	0	0	0	0	0	0	0	0	0	0	0	0	0	0	0	0	0	0	0	0	0	0	0	0	0	0
410	Microtubule-associated protein RP/EB family member 2 OS=Homo sapiens GN=MAPRE2 PE=1 SV=1	MARE2_HUMAN	37	5.28	Homo sapiens	2	2	2	0	0	0	0	2	2	0	0	0	0	0	0	0.11	0.11	0.11	0	0	0	0	0.11	0.11	0	0	0	0	0	0	2	2	2	0	0	0	0	2	2	0	0	0	0	0
411	Dihydrolipoyl dehydrogenase, mitochondrial OS=Homo sapiens GN=DLD PE=1 SV=2	DLDH_HUMAN	54	7.95	Homo sapiens	0	0	0	2	0	2	0	3	3	0	0	0	0	0	0	0	0	0	0.035	0	0.035	0	0.055	0.055	0	0	0	0	0	0	0	0	0	2	0	2	0	3	3	0	0	0	0	0
412	Ig heavy chain V-II region ARH-77 OS=Homo sapiens PE=4 SV=1	HV209_HUMAN	16	8.45	Homo sapiens	0	0	0	0	0	0	0	0	0	2	2	2	0	2	2	0	0	0	0	0	0	0	0	0	0.17	0.17	0.17	0	0.17	0.17	0	0	0	0	0	0	0	0	0	2	2	2	0	2
413	Tubulin alpha-8 chain OS=Homo sapiens GN=TUBA8 PE=1 SV=1	TBA8_HUMAN	50	4.7	Homo sapiens	11	11	14	14	11	0	12	10	0	0	0	0	0	0	0	0.27	0.28	0.35	0.26	0.23	0	0.3	0.27	0	0	0	0	0	0	0	2	2	3	3	2	0	2	3	0	0	0	0	0	0
414	C-C motif chemokine 5 OS=Homo sapiens GN=CCL5 PE=1 SV=3	CCL5_HUMAN	10	9.29	Homo sapiens	0	2	3	2	2	3	0	0	0	0	0	0	0	0	0	0	0.26	0.26	0.26	0.26	0.26	0	0	0	0	0	0	0	0	0	0	2	2	2	2	3	0	0	0	0	0	0	0	0
415	Cytochrome b-245 heavy chain OS=Homo sapiens GN=CYBB PE=1 SV=2	CY24B_HUMAN	65	8.76	Homo sapiens	0	0	0	0	0	0	0	0	0	0	0	0	0	0	0	0	0	0	0	0	0	0	0	0	0	0	0	0	0	0	0	0	0	0	0	0	0	0	0	0	0	0	0	0
416	Aminopeptidase N OS=Homo sapiens GN=ANPEP PE=1 SV=4	AMPN_HUMAN	110	5.14	Homo sapiens	0	0	0	0	0	0	0	0	0	0	0	0	0	0	0	0	0	0	0	0	0	0	0	0	0	0	0	0	0	0	0	0	0	0	0	0	0	0	0	0	0	0	0	0
417	Golgi-associated plant pathogenesis-related protein 1 OS=Homo sapiens GN=GLIPR2 PE=1 SV=3	GAPR1_HUMAN	17	9.92	Homo sapiens	2	0	0	0	3	2	0	0	2	0	0	0	0	0	0	0.17	0	0	0	0.17	0.17	0	0	0.17	0	0	0	0	0	0	2	0	0	0	2	2	0	0	2	0	0	0	0	0
418	Peptidyl-prolyl cis-trans isomerase B OS=Homo sapiens GN=PPIB PE=1 SV=2	PPIB_HUMAN	24	10.07	Homo sapiens	0	0	0	0	2	2	2	0	0	0	0	0	0	0	0	0	0	0	0	0.083	0.19	0.21	0	0	0	0	0	0	0	0	0	0	0	0	2	2	2	0	0	0	0	0	0	0
419	Leukocyte elastase inhibitor OS=Homo sapiens GN=SERPINB1 PE=1 SV=1	ILEU_HUMAN	43	6.19	Homo sapiens	5	5	5	4	4	2	3	3	2	0	0	0	0	0	0	0.13	0.16	0.13	0.14	0.14	0.055	0.087	0.082	0.061	0	0	0	0	0	0	5	5	5	4	4	2	3	3	2	0	0	0	0	0
420	Collagen alpha-3(VI) chain OS=Homo sapiens GN=COL6A3 PE=1 SV=5	CO6A3_HUMAN	344	6.65	Homo sapiens	0	0	0	0	0	0	0	0	0	0	0	0	0	0	0	0	0	0	0	0	0	0	0	0	0	0	0	0	0	0	0	0	0	0	0	0	0	0	0	0	0	0	0	0
421	Vesicle-associated membrane protein 8 OS=Homo sapiens GN=VAMP8 PE=1 SV=1	VAMP8_HUMAN	11	7.53	Homo sapiens	2	0	0	0	3	2	2	0	0	0	0	0	0	0	0	0.28	0	0	0	0.28	0.28	0.28	0	0	0	0	0	0	0	0	2	0	0	0	2	2	2	0	0	0	0	0	0	0
422	Calpain small subunit 1 OS=Homo sapiens GN=CAPNS1 PE=1 SV=1	CPNS1_HUMAN	28	4.82	Homo sapiens	3	3	3	0	0	0	0	2	2	0	0	0	0	0	0	0.13	0.1	0.1	0	0	0	0	0.09	0.09	0	0	0	0	0	0	3	3	3	0	0	0	0	2	2	0	0	0	0	0
423	Ig kappa chain V-III region VG (Fragment) OS=Homo sapiens PE=1 SV=1	KV309_HUMAN	13	4.59	Homo sapiens	0	0	0	0	0	0	0	0	0	0	0	0	0	2	0	0	0	0	0	0	0	0	0	0	0	0	0	0	0.34	0	0	0	0	0	0	0	0	0	0	0	0	0	0	2
424	Ig lambda chain V region 4A OS=Homo sapiens PE=4 SV=1	LV001_HUMAN	12	7.12	Homo sapiens	2	0	0	0	0	0	0	2	2	0	0	0	0	0	0	0.14	0	0	0	0	0	0	0.15	0.15	0	0	0	0	0	0	2	0	0	0	0	0	0	2	2	0	0	0	0	0
425	Glutathione S-transferase kappa 1 OS=Homo sapiens GN=GSTK1 PE=1 SV=3	GSTK1_HUMAN	25	8.69	Homo sapiens	3	2	2	2	2	3	0	3	3	0	0	0	0	0	0	0.16	0.13	0.12	0.12	0.12	0.21	0	0.12	0.12	0	0	0	0	0	0	3	2	2	2	2	3	0	3	3	0	0	0	0	0
426	Tropomyosin beta chain OS=Homo sapiens GN=TPM2 PE=1 SV=1	TPM2_HUMAN	33	4.36	Homo sapiens	11	0	11	0	0	0	0	10	0	0	0	0	0	0	0	0.26	0	0.3	0	0	0	0	0.31	0	0	0	0	0	0	0	3	0	2	0	0	0	0	3	0	0	0	0	0	0
427	Protein S100-A7 OS=Homo sapiens GN=S100A7 PE=1 SV=4	S10A7_HUMAN	11	6.78	Homo sapiens	0	0	0	0	0	0	0	0	0	0	0	0	0	0	0	0	0	0	0	0	0	0	0	0	0	0	0	0	0	0	0	0	0	0	0	0	0	0	0	0	0	0	0	0
428	Ras-related protein Rab-8A OS=Homo sapiens GN=RAB8A PE=1 SV=1	RAB8A_HUMAN	24	9.54	Homo sapiens	0	0	4	4	0	4	0	4	0	0	0	0	0	0	0	0	0	0.19	0.25	0	0.19	0	0.19	0	0	0	0	0	0	0	0	0	2	3	0	2	0	2	0	0	0	0	0	0
429	Heat shock protein beta-1 OS=Homo sapiens GN=HSPB1 PE=1 SV=2	HSPB1_HUMAN	23	6.36	Homo sapiens	0	3	0	0	0	2	0	0	2	0	0	0	0	0	0	0	0.16	0	0	0	0.13	0	0	0.13	0	0	0	0	0	0	0	3	0	0	0	2	0	0	2	0	0	0	0	0
430	Keratin, type II cytoskeletal 73 OS=Homo sapiens GN=KRT73 PE=1 SV=1	K2C73_HUMAN	59	7.26	Homo sapiens	0	0	4	0	0	0	0	0	0	0	0	0	0	0	0	0	0	0.063	0	0	0	0	0	0	0	0	0	0	0	0	0	0	2	0	0	0	0	0	0	0	0	0	0	0
431	Ig heavy chain V-III region WEA OS=Homo sapiens PE=1 SV=1	HV302_HUMAN	12	8.7	Homo sapiens	0	0	0	0	0	0	0	0	0	5	4	4	0	6	6	0	0	0	0	0	0	0	0	0	0.36	0.36	0.36	0	0.36	0.36	0	0	0	0	0	0	0	0	0	2	2	2	0	2
432	Cytochrome c oxidase subunit 5A, mitochondrial OS=Homo sapiens GN=COX5A PE=1 SV=2	COX5A_HUMAN	17	6.78	Homo sapiens	3	2	3	0	0	0	0	2	2	0	0	0	0	0	0	0.18	0.17	0.28	0	0	0	0	0.17	0.067	0	0	0	0	0	0	3	2	3	0	0	0	0	2	2	0	0	0	0	0
433	Annexin A3 OS=Homo sapiens GN=ANXA3 PE=1 SV=3	ANXA3_HUMAN	36	5.71	Homo sapiens	0	0	0	0	0	0	0	0	0	0	0	0	0	0	0	0	0	0	0	0	0	0	0	0	0	0	0	0	0	0	0	0	0	0	0	0	0	0	0	0	0	0	0	0
434	Annexin A1 OS=Homo sapiens GN=ANXA1 PE=1 SV=2	ANXA1_HUMAN	39	7.04	Homo sapiens	0	0	0	0	0	0	0	0	0	3	0	2	3	0	0	0	0	0	0	0	0	0	0	0	0.16	0	0.09	0.078	0	0	0	0	0	0	0	0	0	0	0	3	0	2	3	0
435	Protein 4.1 OS=Homo sapiens GN=EPB41 PE=1 SV=4	41_HUMAN	97	5.27	Homo sapiens	0	0	0	0	0	0	0	0	0	0	0	0	0	0	0	0	0	0	0	0	0	0	0	0	0	0	0	0	0	0	0	0	0	0	0	0	0	0	0	0	0	0	0	0
436	Aconitate hydratase, mitochondrial OS=Homo sapiens GN=ACO2 PE=1 SV=2	ACON_HUMAN	85	7.65	Homo sapiens	2	4	2	0	2	3	2	2	2	0	0	0	0	0	0	0.042	0.079	0.042	0	0.042	0.062	0.041	0.042	0.042	0	0	0	0	0	0	2	4	2	0	2	3	2	2	2	0	0	0	0	0
437	Ras-related protein Rab-14 OS=Homo sapiens GN=RAB14 PE=1 SV=4	RAB14_HUMAN	24	6.13	Homo sapiens	0	4	4	0	4	4	3	0	4	0	0	0	0	0	0	0	0.27	0.27	0	0.27	0.27	0.27	0	0.27	0	0	0	0	0	0	0	2	2	0	2	2	2	0	2	0	0	0	0	0
438	Corticosteroid-binding globulin OS=Homo sapiens GN=SERPINA6 PE=1 SV=1	CBG_HUMAN	45	5.95	Homo sapiens	0	0	0	0	0	0	0	0	0	6	4	6	4	5	6	0	0	0	0	0	0	0	0	0	0.16	0.12	0.23	0.14	0.19	0.25	0	0	0	0	0	0	0	0	0	5	3	6	4	4
439	CD226 antigen OS=Homo sapiens GN=CD226 PE=1 SV=2	CD226_HUMAN	39	8.04	Homo sapiens	0	2	2	0	0	0	0	0	0	0	0	0	0	0	0	0	0.1	0.1	0	0	0	0	0	0	0	0	0	0	0	0	0	2	2	0	0	0	0	0	0	0	0	0	0	0
440	Keratin, type II cytoskeletal 6C OS=Homo sapiens GN=KRT6C PE=1 SV=3	K2C6C_HUMAN	60	8.16	Homo sapiens	0	0	0	0	0	0	12	0	10	0	0	0	0	0	0	0	0	0	0	0	0	0.18	0	0.18	0	0	0	0	0	0	0	0	0	0	0	0	2	0	2	0	0	0	0	0
441	cAMP-dependent protein kinase type I-alpha regulatory subunit OS=Homo sapiens GN=PRKAR1A PE=1 SV=1	KAP0_HUMAN	43	5	Homo sapiens	2	3	0	2	0	2	2	0	2	0	0	0	0	0	0	0.066	0.097	0	0.066	0	0.066	0.066	0	0.066	0	0	0	0	0	0	2	3	0	2	0	2	2	0	2	0	0	0	0	0
442	Histone H1.3 OS=Homo sapiens GN=HIST1H1D PE=1 SV=2	H13_HUMAN	22	11.79	Homo sapiens	2	3	0	2	0	4	0	4	3	0	0	0	0	0	0	0.12	0.12	0	0.11	0	0.16	0	0.17	0.12	0	0	0	0	0	0	2	2	0	2	0	4	0	3	2	0	0	0	0	0
443	Apolipoprotein A-V OS=Homo sapiens GN=APOA5 PE=1 SV=1	APOA5_HUMAN	41	6.4	Homo sapiens	0	0	0	0	0	0	0	0	0	0	2	2	2	0	0	0	0	0	0	0	0	0	0	0	0	0.055	0.055	0.044	0	0	0	0	0	0	0	0	0	0	0	0	2	2	2	0
444	Myosin light chain kinase, smooth muscle OS=Homo sapiens GN=MYLK PE=1 SV=4	MYLK_HUMAN	211	6.03	Homo sapiens	2	0	0	0	0	0	0	0	0	0	0	0	0	0	0	0.011	0	0	0	0	0	0	0	0	0	0	0	0	0	0	2	0	0	0	0	0	0	0	0	0	0	0	0	0
445	Brain acid soluble protein 1 OS=Homo sapiens GN=BASP1 PE=1 SV=2	BASP1_HUMAN	23	4.3	Homo sapiens	0	0	0	0	0	0	0	0	0	0	0	0	0	0	0	0	0	0	0	0	0	0	0	0	0	0	0	0	0	0	0	0	0	0	0	0	0	0	0	0	0	0	0	0
446	ATP synthase subunit gamma, mitochondrial OS=Homo sapiens GN=ATP5C1 PE=1 SV=1	ATPG_HUMAN	33	9.71	Homo sapiens	2	0	0	2	2	0	0	2	2	0	0	0	0	0	0	0.081	0	0	0.081	0.081	0	0	0.081	0.081	0	0	0	0	0	0	2	0	0	2	2	0	0	2	2	0	0	0	0	0
447	F-actin-capping protein subunit alpha-2 OS=Homo sapiens GN=CAPZA2 PE=1 SV=3	CAZA2_HUMAN	33	5.65	Homo sapiens	3	3	3	3	3	2	0	2	2	0	0	0	0	0	0	0.11	0.11	0.11	0.11	0.11	0.077	0	0.077	0.077	0	0	0	0	0	0	2	2	2	2	2	2	0	2	2	0	0	0	0	0
448	cGMP-specific 3',5'-cyclic phosphodiesterase OS=Homo sapiens GN=PDE5A PE=1 SV=2	PDE5A_HUMAN	100	6	Homo sapiens	0	0	0	0	0	0	0	2	2	0	0	0	0	0	0	0	0	0	0	0	0	0	0.022	0.031	0	0	0	0	0	0	0	0	0	0	0	0	0	2	2	0	0	0	0	0
449	Drebrin-like protein OS=Homo sapiens GN=DBNL PE=1 SV=1	DBNL_HUMAN	48	4.72	Homo sapiens	0	2	3	2	0	0	0	2	2	0	0	0	0	0	0	0	0.056	0.084	0.058	0	0	0	0.058	0.058	0	0	0	0	0	0	0	2	3	2	0	0	0	2	2	0	0	0	0	0
450	Actin-related protein 2/3 complex subunit 5 OS=Homo sapiens GN=ARPC5 PE=1 SV=3	ARPC5_HUMAN	16	5.3	Homo sapiens	0	2	0	2	0	2	0	0	0	0	0	0	0	0	0	0	0.23	0	0.23	0	0.23	0	0	0	0	0	0	0	0	0	0	2	0	2	0	2	0	0	0	0	0	0	0	0
451	Tropomyosin alpha-1 chain OS=Homo sapiens GN=TPM1 PE=1 SV=2	TPM1_HUMAN	33	4.39	Homo sapiens	11	0	0	0	0	10	0	0	0	0	0	0	0	0	0	0.35	0	0	0	0	0.28	0	0	0	0	0	0	0	0	0	2	0	0	0	0	2	0	0	0	0	0	0	0	0
452	Transforming growth factor beta-1-induced transcript 1 protein OS=Homo sapiens GN=TGFB1I1 PE=1 SV=2	TGFI1_HUMAN	50	7.03	Homo sapiens	2	2	2	0	2	3	0	0	0	0	0	0	0	0	0	0.063	0.063	0.063	0	0.063	0.095	0	0	0	0	0	0	0	0	0	2	2	2	0	2	3	0	0	0	0	0	0	0	0
453	Prohibitin OS=Homo sapiens GN=PHB PE=1 SV=1	PHB_HUMAN	30	5.46	Homo sapiens	2	2	2	0	0	0	0	2	0	0	0	0	0	0	0	0.081	0.081	0.081	0	0	0	0	0.081	0	0	0	0	0	0	0	2	2	2	0	0	0	0	2	0	0	0	0	0	0
454	Coiled-coil-helix-coiled-coil-helix domain-containing protein 3, mitochondrial OS=Homo sapiens GN=CHCHD3 PE=1 SV=1	CHCH3_HUMAN	26	8.48	Homo sapiens	0	2	2	2	2	2	0	0	2	0	0	0	0	0	0	0	0	0	0	0	0	0	0	0	0	0	0	0	0	0	0	2	2	2	2	2	0	0	2	0	0	0	0	0
455	Ras GTPase-activating-like protein IQGAP2 OS=Homo sapiens GN=IQGAP2 PE=1 SV=4	IQGA2_HUMAN	181	5.33	Homo sapiens	0	0	2	0	0	0	0	0	0	0	0	0	0	0	0	0	0	0.021	0	0	0	0	0	0	0	0	0	0	0	0	0	0	2	0	0	0	0	0	0	0	0	0	0	0
456	Purine nucleoside phosphorylase OS=Homo sapiens GN=PNP PE=1 SV=2	PNPH_HUMAN	32	6.95	Homo sapiens	0	0	0	0	2	2	0	0	2	0	0	0	0	0	0	0	0	0	0	0.08	0.076	0	0	0.076	0	0	0	0	0	0	0	0	0	0	2	2	0	0	2	0	0	0	0	0
457	Guanine nucleotide-binding protein subunit alpha-13 OS=Homo sapiens GN=GNA13 PE=1 SV=2	GNA13_HUMAN	44	8.13	Homo sapiens	4	3	0	3	2	0	0	2	2	0	0	0	0	0	0	0.12	0.088	0	0.093	0.064	0	0	0.069	0.058	0	0	0	0	0	0	3	2	0	2	2	0	0	2	2	0	0	0	0	0
458	T-complex protein 1 subunit gamma OS=Homo sapiens GN=CCT3 PE=1 SV=4	TCPG_HUMAN	61	6.44	Homo sapiens	0	2	2	0	0	2	2	2	2	0	0	0	0	0	0	0	0.048	0.048	0	0	0.05	0.04	0.042	0.05	0	0	0	0	0	0	0	2	2	0	0	2	2	2	2	0	0	0	0	0
459	Ig heavy chain V-III region TUR OS=Homo sapiens PE=1 SV=1	HV318_HUMAN	12	10.12	Homo sapiens	0	0	0	0	0	0	0	0	0	0	0	0	0	0	0	0	0	0	0	0	0	0	0	0	0	0	0	0	0	0	0	0	0	0	0	0	0	0	0	0	0	0	0	0
460	GTP-binding protein SAR1a OS=Homo sapiens GN=SAR1A PE=1 SV=1	SAR1A_HUMAN	22	6.68	Homo sapiens	0	0	0	0	0	0	0	2	2	0	0	0	0	0	0	0	0	0	0	0	0	0	0.11	0.11	0	0	0	0	0	0	0	0	0	0	0	0	0	2	2	0	0	0	0	0
461	Hemoglobin subunit delta OS=Homo sapiens GN=HBD PE=1 SV=2	HBD_HUMAN	16	8.26	Homo sapiens	0	0	0	0	0	0	0	0	0	0	0	0	0	0	0	0	0	0	0	0	0	0	0	0	0	0	0	0	0	0	0	0	0	0	0	0	0	0	0	0	0	0	0	0
462	Alpha-soluble NSF attachment protein OS=Homo sapiens GN=NAPA PE=1 SV=3	SNAA_HUMAN	33	5.02	Homo sapiens	0	0	2	0	0	0	2	3	2	0	0	0	0	0	0	0	0	0.12	0	0	0	0.078	0.12	0.088	0	0	0	0	0	0	0	0	2	0	0	0	2	3	2	0	0	0	0	0
463	Succinate dehydrogenase [ubiquinone] flavoprotein subunit, mitochondrial OS=Homo sapiens GN=SDHA PE=1 SV=2	DHSA_HUMAN	73	7.06	Homo sapiens	0	2	3	0	0	0	3	0	0	0	0	0	0	0	0	0	0	0	0	0	0	0	0	0	0	0	0	0	0	0	0	2	3	0	0	0	3	0	0	0	0	0	0	0
464	Mannan-binding lectin serine protease 1 OS=Homo sapiens GN=MASP1 PE=1 SV=3	MASP1_HUMAN	79	5.18	Homo sapiens	0	0	0	0	0	0	0	0	0	5	5	4	0	0	3	0	0	0	0	0	0	0	0	0	0.089	0.096	0.067	0	0	0.044	0	0	0	0	0	0	0	0	0	4	4	3	0	0
465	Keratin, type II cytoskeletal 1b OS=Homo sapiens GN=KRT77 PE=2 SV=3	K2C1B_HUMAN	62	5.78	Homo sapiens	0	0	0	0	0	0	0	0	0	0	0	0	0	0	0	0	0	0	0	0	0	0	0	0	0	0	0	0	0	0	0	0	0	0	0	0	0	0	0	0	0	0	0	0
466	Pregnancy zone protein OS=Homo sapiens GN=PZP PE=1 SV=4	PZP_HUMAN	164	6.33	Homo sapiens	0	0	0	0	0	0	0	0	0	0	0	0	0	0	0	0	0	0	0	0	0	0	0	0	0	0	0	0	0	0	0	0	0	0	0	0	0	0	0	0	0	0	0	0
467	Septin-11 OS=Homo sapiens GN=SEPT11 PE=1 SV=3	SEP11_HUMAN	49	6.8	Homo sapiens	2	2	0	3	0	2	0	2	0	0	0	0	0	0	0	0.054	0.054	0	0.075	0	0.054	0	0.054	0	0	0	0	0	0	0	2	2	0	2	0	2	0	2	0	0	0	0	0	0
468	Keratin, type II cytoskeletal 6B OS=Homo sapiens GN=KRT6B PE=1 SV=5	K2C6B_HUMAN	60	8.16	Homo sapiens	0	0	0	0	0	0	0	0	0	0	0	0	0	0	0	0	0	0	0	0	0	0	0	0	0	0	0	0	0	0	0	0	0	0	0	0	0	0	0	0	0	0	0	0
469	Dynamin-1-like protein OS=Homo sapiens GN=DNM1L PE=1 SV=2	DNM1L_HUMAN	82	6.8	Homo sapiens	2	2	0	0	0	0	0	2	0	0	0	0	0	0	0	0.031	0.031	0	0	0	0	0	0.031	0	0	0	0	0	0	0	2	2	0	0	0	0	0	2	0	0	0	0	0	0
470	Glutathione S-transferase omega-1 OS=Homo sapiens GN=GSTO1 PE=1 SV=2	GSTO1_HUMAN	28	6.54	Homo sapiens	0	0	0	0	0	0	0	2	2	0	0	0	0	0	0	0	0	0	0	0	0	0	0.11	0.11	0	0	0	0	0	0	0	0	0	0	0	0	0	2	2	0	0	0	0	0
471	ATPase inhibitor, mitochondrial OS=Homo sapiens GN=ATPIF1 PE=1 SV=1	ATIF1_HUMAN	12	10.05	Homo sapiens	0	0	0	0	0	0	0	0	0	0	0	0	0	0	0	0	0	0	0	0	0	0	0	0	0	0	0	0	0	0	0	0	0	0	0	0	0	0	0	0	0	0	0	0
472	2,4-dienoyl-CoA reductase, mitochondrial OS=Homo sapiens GN=DECR1 PE=1 SV=1	DECR_HUMAN	36	9.84	Homo sapiens	0	2	2	2	0	0	0	2	2	0	0	0	0	0	0	0	0.078	0.078	0.081	0	0	0	0.078	0.078	0	0	0	0	0	0	0	2	2	2	0	0	0	2	2	0	0	0	0	0
473	Ig heavy chain V-I region V35 OS=Homo sapiens PE=1 SV=1	HV103_HUMAN	13	9.87	Homo sapiens	0	0	0	0	0	0	0	0	0	0	0	0	0	0	0	0	0	0	0	0	0	0	0	0	0	0	0	0	0	0	0	0	0	0	0	0	0	0	0	0	0	0	0	0
474	T-complex protein 1 subunit theta OS=Homo sapiens GN=CCT8 PE=1 SV=4	TCPQ_HUMAN	60	5.3	Homo sapiens	2	4	4	0	0	3	3	0	0	0	0	0	0	0	0	0.044	0.11	0.11	0	0	0.078	0.078	0	0	0	0	0	0	0	0	2	4	4	0	0	3	3	0	0	0	0	0	0	0
475	Thioredoxin OS=Homo sapiens GN=TXN PE=1 SV=3	THIO_HUMAN	12	4.55	Homo sapiens	0	0	0	0	0	0	0	0	0	0	0	0	0	0	0	0	0	0	0	0	0	0	0	0	0	0	0	0	0	0	0	0	0	0	0	0	0	0	0	0	0	0	0	0
476	Phosphatidylcholine-sterol acyltransferase OS=Homo sapiens GN=LCAT PE=1 SV=1	LCAT_HUMAN	50	6.04	Homo sapiens	0	0	0	0	0	0	0	0	0	3	3	2	0	3	3	0	0	0	0	0	0	0	0	0	0.082	0.082	0.057	0	0.086	0.082	0	0	0	0	0	0	0	0	0	3	3	2	0	3
477	Neutral alpha-glucosidase AB OS=Homo sapiens GN=GANAB PE=1 SV=3	GANAB_HUMAN	107	6.06	Homo sapiens	2	0	2	2	2	0	0	0	0	0	0	0	0	0	0	0.025	0	0.052	0.034	0.034	0	0	0	0	0	0	0	0	0	0	2	0	2	2	2	0	0	0	0	0	0	0	0	0
478	Ig kappa chain V-I region Wes OS=Homo sapiens PE=1 SV=1	KV119_HUMAN	12	7.41	Homo sapiens	0	0	0	0	0	0	0	0	0	0	0	0	0	0	0	0	0	0	0	0	0	0	0	0	0	0	0	0	0	0	0	0	0	0	0	0	0	0	0	0	0	0	0	0
479	Guanine nucleotide-binding protein subunit beta-4 OS=Homo sapiens GN=GNB4 PE=1 SV=3	GBB4_HUMAN	38	5.85	Homo sapiens	0	0	0	3	0	3	4	0	0	0	0	0	0	0	0	0	0	0	0.14	0	0.14	0.16	0	0	0	0	0	0	0	0	0	0	0	2	0	2	2	0	0	0	0	0	0	0
480	Antileukoproteinase OS=Homo sapiens GN=SLPI PE=1 SV=2	SLPI_HUMAN	14	8.85	Homo sapiens	0	0	0	0	0	0	0	0	0	0	0	0	0	0	0	0	0	0	0	0	0	0	0	0	0	0	0	0	0	0	0	0	0	0	0	0	0	0	0	0	0	0	0	0
481	Guanine nucleotide-binding protein G(z) subunit alpha OS=Homo sapiens GN=GNAZ PE=2 SV=3	GNAZ_HUMAN	41	7.69	Homo sapiens	0	0	0	0	0	0	0	0	0	0	0	0	0	0	0	0	0	0	0	0	0	0	0	0	0	0	0	0	0	0	0	0	0	0	0	0	0	0	0	0	0	0	0	0
482	Carcinoembryonic antigen-related cell adhesion molecule 8 OS=Homo sapiens GN=CEACAM8 PE=1 SV=2	CEAM8_HUMAN	38	7.45	Homo sapiens	0	0	0	0	0	0	0	0	0	0	0	0	0	0	0	0	0	0	0	0	0	0	0	0	0	0	0	0	0	0	0	0	0	0	0	0	0	0	0	0	0	0	0	0
483	Glucosidase 2 subunit beta OS=Homo sapiens GN=PRKCSH PE=1 SV=2	GLU2B_HUMAN	59	4.05	Homo sapiens	0	0	2	0	2	0	2	2	0	0	0	0	0	0	0	0	0	0.044	0	0.074	0	0.044	0.068	0	0	0	0	0	0	0	0	0	2	0	2	0	2	2	0	0	0	0	0	0
484	Neurogranin OS=Homo sapiens GN=NRGN PE=1 SV=1	NEUG_HUMAN	8	8.06	Homo sapiens	2	2	2	2	2	3	2	2	2	0	0	0	0	0	0	0.22	0.22	0.22	0.22	0.22	0.22	0.22	0.22	0.22	0	0	0	0	0	0	2	2	2	2	2	2	2	2	2	0	0	0	0	0
485	Tyrosine-protein kinase BTK OS=Homo sapiens GN=BTK PE=1 SV=3	BTK_HUMAN	76	7.86	Homo sapiens	2	2	0	2	2	3	3	0	3	0	0	0	0	0	0	0.018	0.018	0	0.018	0.018	0.033	0.033	0	0.033	0	0	0	0	0	0	2	2	0	2	2	3	3	0	3	0	0	0	0	0
486	Citrate synthase, mitochondrial OS=Homo sapiens GN=CS PE=1 SV=2	CISY_HUMAN	52	8.53	Homo sapiens	0	0	0	0	0	0	0	0	0	0	0	0	0	0	0	0	0	0	0	0	0	0	0	0	0	0	0	0	0	0	0	0	0	0	0	0	0	0	0	0	0	0	0	0
487	Very long-chain specific acyl-CoA dehydrogenase, mitochondrial OS=Homo sapiens GN=ACADVL PE=1 SV=1	ACADV_HUMAN	70	9.1	Homo sapiens	0	0	0	3	3	3	0	0	0	0	0	0	0	0	0	0	0	0	0.043	0.052	0.052	0	0	0	0	0	0	0	0	0	0	0	0	3	3	3	0	0	0	0	0	0	0	0
488	Annexin A11 OS=Homo sapiens GN=ANXA11 PE=1 SV=1	ANX11_HUMAN	54	7.77	Homo sapiens	0	0	2	0	0	0	0	0	0	0	0	0	0	0	0	0	0	0.055	0	0	0	0	0	0	0	0	0	0	0	0	0	0	2	0	0	0	0	0	0	0	0	0	0	0
489	Protein NipSnap homolog 3A OS=Homo sapiens GN=NIPSNAP3A PE=1 SV=2	NPS3A_HUMAN	28	9.55	Homo sapiens	0	0	0	0	0	0	0	0	2	0	0	0	0	0	0	0	0	0	0	0	0	0	0	0.1	0	0	0	0	0	0	0	0	0	0	0	0	0	0	2	0	0	0	0	0
490	Apoptosis-inducing factor 1, mitochondrial OS=Homo sapiens GN=AIFM1 PE=1 SV=1	AIFM1_HUMAN	67	9.39	Homo sapiens	0	0	0	0	2	0	0	0	0	0	0	0	0	0	0	0	0	0	0	0.036	0	0	0	0	0	0	0	0	0	0	0	0	0	0	2	0	0	0	0	0	0	0	0	0
491	Ras GTPase-activating protein 3 OS=Homo sapiens GN=RASA3 PE=1 SV=3	RASA3_HUMAN	96	7.16	Homo sapiens	0	2	3	0	2	0	2	3	3	0	0	0	0	0	0	0	0.029	0.042	0	0.04	0	0.037	0.053	0.05	0	0	0	0	0	0	0	2	3	0	2	0	2	3	3	0	0	0	0	0
492	HLA class I histocompatibility antigen, B-18 alpha chain OS=Homo sapiens GN=HLA-B PE=1 SV=1	1B18_HUMAN	40	6.74	Homo sapiens	0	0	0	0	0	0	0	8	0	0	0	0	0	0	0	0	0	0	0	0	0	0	0.22	0	0	0	0	0	0	0	0	0	0	0	0	0	0	2	0	0	0	0	0	0
493	Protein S100-A6 OS=Homo sapiens GN=S100A6 PE=1 SV=1	S10A6_HUMAN	10	5.15	Homo sapiens	0	0	0	0	0	0	0	0	0	0	0	0	0	0	0	0	0	0	0	0	0	0	0	0	0	0	0	0	0	0	0	0	0	0	0	0	0	0	0	0	0	0	0	0
494	Serglycin OS=Homo sapiens GN=SRGN PE=1 SV=3	SRGN_HUMAN	18	4.57	Homo sapiens	2	0	0	2	0	2	0	0	0	0	0	0	0	0	0	0.19	0	0	0.19	0	0.19	0	0	0	0	0	0	0	0	0	2	0	0	2	0	2	0	0	0	0	0	0	0	0
495	Thioredoxin-related transmembrane protein 1 OS=Homo sapiens GN=TMX1 PE=1 SV=1	TMX1_HUMAN	32	4.63	Homo sapiens	0	0	0	0	0	0	0	0	2	0	0	0	0	0	0	0	0	0	0	0	0	0	0	0.089	0	0	0	0	0	0	0	0	0	0	0	0	0	0	2	0	0	0	0	0
496	Sushi, von Willebrand factor type A, EGF and pentraxin domain-containing protein 1 OS=Homo sapiens GN=SVEP1 PE=1 SV=3	SVEP1_HUMAN	390	5.2	Homo sapiens	0	0	0	0	0	0	0	0	0	0	0	0	0	0	0	0	0	0	0	0	0	0	0	0	0	0	0	0	0	0	0	0	0	0	0	0	0	0	0	0	0	0	0	0
497	Ribonuclease 4 OS=Homo sapiens GN=RNASE4 PE=1 SV=3	RNAS4_HUMAN	17	9.17	Homo sapiens	0	0	0	0	0	0	0	0	0	0	0	0	0	0	0	0	0	0	0	0	0	0	0	0	0	0	0	0	0	0	0	0	0	0	0	0	0	0	0	0	0	0	0	0
498	Tubulin alpha-1C chain OS=Homo sapiens GN=TUBA1C PE=1 SV=1	TBA1C_HUMAN	50	4.73	Homo sapiens	13	16	20	16	0	0	16	13	13	0	0	0	0	0	0	0.36	0.45	0.53	0.37	0	0	0.44	0.36	0.41	0	0	0	0	0	0	2	2	2	2	0	0	2	2	2	0	0	0	0	0
499	ATP synthase subunit d, mitochondrial OS=Homo sapiens GN=ATP5H PE=1 SV=3	ATP5H_HUMAN	18	4.94	Homo sapiens	2	3	2	0	0	0	0	0	0	0	0	0	0	0	0	0.11	0.17	0.11	0	0	0	0	0	0	0	0	0	0	0	0	2	3	2	0	0	0	0	0	0	0	0	0	0	0
500	Ras-related protein Rab-5C OS=Homo sapiens GN=RAB5C PE=1 SV=2	RAB5C_HUMAN	23	8.61	Homo sapiens	0	0	0	0	0	0	2	0	0	0	0	0	0	0	0	0	0	0	0	0	0	0.11	0	0	0	0	0	0	0	0	0	0	0	0	0	0	2	0	0	0	0	0	0	0
501	ATP synthase subunit delta, mitochondrial OS=Homo sapiens GN=ATP5D PE=1 SV=2	ATPD_HUMAN	17	5.19	Homo sapiens	0	0	0	0	0	0	0	0	0	0	0	0	0	0	0	0	0	0	0	0	0	0	0	0	0	0	0	0	0	0	0	0	0	0	0	0	0	0	0	0	0	0	0	0
502	Dolichyl-diphosphooligosaccharide--protein glycosyltransferase 48 kDa subunit OS=Homo sapiens GN=DDOST PE=1 SV=4	OST48_HUMAN	51	6.52	Homo sapiens	0	2	0	0	0	2	0	0	0	0	0	0	0	0	0	0	0.044	0	0	0	0.044	0	0	0	0	0	0	0	0	0	0	2	0	0	0	2	0	0	0	0	0	0	0	0
503	Keratin, type II cytoskeletal 80 OS=Homo sapiens GN=KRT80 PE=1 SV=2	K2C80_HUMAN	51	5.36	Homo sapiens	0	0	0	0	0	0	0	0	0	0	0	0	0	0	0	0	0	0	0	0	0	0	0	0	0	0	0	0	0	0	0	0	0	0	0	0	0	0	0	0	0	0	0	0
504	Small proline-rich protein 2A OS=Homo sapiens GN=SPRR2A PE=1 SV=1	SPR2A_HUMAN	8	8.49	Homo sapiens	0	0	0	0	0	0	0	0	0	2	3	2	0	0	0	0	0	0	0	0	0	0	0	0	0.31	0.31	0.31	0	0	0	0	0	0	0	0	0	0	0	0	2	2	2	0	0
505	Collectin-11 OS=Homo sapiens GN=COLEC11 PE=1 SV=1	COL11_HUMAN	29	5.06	Homo sapiens	0	0	0	0	0	0	0	0	0	0	0	0	0	0	2	0	0	0	0	0	0	0	0	0	0	0	0	0	0	0.077	0	0	0	0	0	0	0	0	0	0	0	0	0	0
506	Src substrate cortactin OS=Homo sapiens GN=CTTN PE=1 SV=2	SRC8_HUMAN	62	5.05	Homo sapiens	0	0	0	0	0	0	0	0	0	0	0	0	0	0	0	0	0	0	0	0	0	0	0	0	0	0	0	0	0	0	0	0	0	0	0	0	0	0	0	0	0	0	0	0
507	Septin-5 OS=Homo sapiens GN=SEPT5 PE=1 SV=1	SEPT5_HUMAN	43	6.65	Homo sapiens	0	0	0	0	0	0	2	0	0	0	0	0	0	0	0	0	0	0	0	0	0	0.076	0	0	0	0	0	0	0	0	0	0	0	0	0	0	2	0	0	0	0	0	0	0
508	Protein Shroom3 OS=Homo sapiens GN=SHROOM3 PE=1 SV=2	SHRM3_HUMAN	217	7.85	Homo sapiens	0	0	0	0	0	0	0	0	0	0	0	0	0	0	0	0	0	0	0	0	0	0	0	0	0	0	0	0	0	0	0	0	0	0	0	0	0	0	0	0	0	0	0	0
509	Transforming growth factor-beta-induced protein ig-h3 OS=Homo sapiens GN=TGFBI PE=1 SV=1	BGH3_HUMAN	75	7.77	Homo sapiens	0	0	0	0	0	0	0	0	0	0	0	0	0	0	0	0	0	0	0	0	0	0	0	0	0	0	0	0	0	0	0	0	0	0	0	0	0	0	0	0	0	0	0	0
510	SH3 domain-binding glutamic acid-rich-like protein 3 OS=Homo sapiens GN=SH3BGRL3 PE=1 SV=1	SH3L3_HUMAN	10	4.56	Homo sapiens	0	0	2	0	0	0	0	0	0	0	0	0	0	0	0	0	0	0.32	0	0	0	0	0	0	0	0	0	0	0	0	0	0	2	0	0	0	0	0	0	0	0	0	0	0
511	FYN-binding protein OS=Homo sapiens GN=FYB PE=1 SV=2	FYB_HUMAN	85	6.41	Homo sapiens	0	0	0	0	0	0	0	0	0	0	0	0	0	0	0	0	0	0	0	0	0	0	0	0	0	0	0	0	0	0	0	0	0	0	0	0	0	0	0	0	0	0	0	0
512	Beta-Ala-His dipeptidase OS=Homo sapiens GN=CNDP1 PE=1 SV=4	CNDP1_HUMAN	57	4.95	Homo sapiens	0	0	0	0	0	0	0	0	0	3	2	2	2	4	4	0	0	0	0	0	0	0	0	0	0.075	0.043	0.043	0.043	0.11	0.099	0	0	0	0	0	0	0	0	0	3	2	2	2	4
513	Galectin-3-binding protein OS=Homo sapiens GN=LGALS3BP PE=1 SV=1	LG3BP_HUMAN	65	4.9	Homo sapiens	0	0	0	0	0	0	0	0	0	0	0	0	0	0	0	0	0	0	0	0	0	0	0	0	0	0	0	0	0	0	0	0	0	0	0	0	0	0	0	0	0	0	0	0
514	Basigin OS=Homo sapiens GN=BSG PE=1 SV=2	BASI_HUMAN	42	5.4	Homo sapiens	0	2	0	0	2	0	0	0	0	0	0	0	0	0	0	0	0.088	0	0	0.06	0	0	0	0	0	0	0	0	0	0	0	2	0	0	2	0	0	0	0	0	0	0	0	0
515	Rho GDP-dissociation inhibitor 2 OS=Homo sapiens GN=ARHGDIB PE=1 SV=3	GDIR2_HUMAN	23	4.84	Homo sapiens	0	2	0	0	0	0	0	0	0	0	0	0	0	0	0	0	0.25	0	0	0	0	0	0	0	0	0	0	0	0	0	0	2	0	0	0	0	0	0	0	0	0	0	0	0
516	Hydroxyacyl-coenzyme A dehydrogenase, mitochondrial OS=Homo sapiens GN=HADH PE=1 SV=3	HCDH_HUMAN	34	9.41	Homo sapiens	0	2	2	4	0	0	0	0	0	0	0	0	0	0	0	0	0.096	0.11	0.17	0	0	0	0	0	0	0	0	0	0	0	0	2	2	4	0	0	0	0	0	0	0	0	0	0
517	Src kinase-associated phosphoprotein 2 OS=Homo sapiens GN=SKAP2 PE=1 SV=1	SKAP2_HUMAN	41	4.29	Homo sapiens	0	0	0	0	0	0	0	0	0	0	0	0	0	0	0	0	0	0	0	0	0	0	0	0	0	0	0	0	0	0	0	0	0	0	0	0	0	0	0	0	0	0	0	0
518	Attractin OS=Homo sapiens GN=ATRN PE=1 SV=2	ATRN_HUMAN	159	7.32	Homo sapiens	0	0	0	0	0	0	0	0	0	0	0	0	0	0	0	0	0	0	0	0	0	0	0	0	0	0	0	0	0	0	0	0	0	0	0	0	0	0	0	0	0	0	0	0
519	Lymphocyte antigen 6 complex locus protein G6f OS=Homo sapiens GN=LY6G6F PE=1 SV=2	LY66F_HUMAN	32	8.65	Homo sapiens	2	0	0	0	0	0	0	0	0	0	0	0	0	0	0	0.077	0	0	0	0	0	0	0	0	0	0	0	0	0	0	2	0	0	0	0	0	0	0	0	0	0	0	0	0
520	BPI fold-containing family B member 1 OS=Homo sapiens GN=BPIFB1 PE=1 SV=1	BPIB1_HUMAN	52	7.26	Homo sapiens	0	0	0	0	0	0	0	0	0	2	0	2	0	0	0	0	0	0	0	0	0	0	0	0	0.056	0	0.037	0	0	0	0	0	0	0	0	0	0	0	0	2	0	2	0	0
521	Lumican OS=Homo sapiens GN=LUM PE=1 SV=2	LUM_HUMAN	38	6.6	Homo sapiens	0	0	0	0	0	0	0	0	0	0	2	0	0	2	2	0	0	0	0	0	0	0	0	0	0	0.062	0	0	0.053	0.062	0	0	0	0	0	0	0	0	0	0	2	0	0	2
522	Thiosulfate sulfurtransferase OS=Homo sapiens GN=TST PE=1 SV=4	THTR_HUMAN	33	7.28	Homo sapiens	0	0	2	0	0	0	0	0	0	0	0	0	0	0	0	0	0	0.081	0	0	0	0	0	0	0	0	0	0	0	0	0	0	2	0	0	0	0	0	0	0	0	0	0	0
523	WD repeat-containing protein 44 OS=Homo sapiens GN=WDR44 PE=1 SV=1	WDR44_HUMAN	101	5.1	Homo sapiens	0	0	0	0	0	0	2	2	2	0	0	0	0	0	0	0	0	0	0	0	0	0.023	0.023	0.023	0	0	0	0	0	0	0	0	0	0	0	0	2	2	2	0	0	0	0	0
524	Leukocyte surface antigen CD47 OS=Homo sapiens GN=CD47 PE=1 SV=1	CD47_HUMAN	35	7.27	Homo sapiens	0	0	0	2	0	0	0	0	0	0	0	0	0	0	0	0	0	0	0.062	0	0	0	0	0	0	0	0	0	0	0	0	0	0	2	0	0	0	0	0	0	0	0	0	0
525	Calcium uniporter protein, mitochondrial OS=Homo sapiens GN=MCU PE=1 SV=1	MCU_HUMAN	40	8.84	Homo sapiens	4	3	2	0	0	0	0	0	2	0	0	0	0	0	0	0.13	0.12	0.083	0	0	0	0	0	0.083	0	0	0	0	0	0	4	3	2	0	0	0	0	0	2	0	0	0	0	0
526	Anoctamin-6 OS=Homo sapiens GN=ANO6 PE=1 SV=2	ANO6_HUMAN	106	7.83	Homo sapiens	0	0	0	0	0	0	0	0	0	0	0	0	0	0	0	0	0	0	0	0	0	0	0	0	0	0	0	0	0	0	0	0	0	0	0	0	0	0	0	0	0	0	0	0
527	Ig heavy chain V-III region GA OS=Homo sapiens PE=1 SV=1	HV308_HUMAN	13	10.02	Homo sapiens	0	0	0	0	0	0	0	0	0	0	0	0	0	0	0	0	0	0	0	0	0	0	0	0	0	0	0	0	0	0	0	0	0	0	0	0	0	0	0	0	0	0	0	0
528	Inverted formin-2 OS=Homo sapiens GN=INF2 PE=1 SV=2	INF2_HUMAN	136	5.03	Homo sapiens	2	0	0	0	0	0	0	0	0	0	0	0	0	0	0	0.029	0	0	0	0	0	0	0	0	0	0	0	0	0	0	2	0	0	0	0	0	0	0	0	0	0	0	0	0
529	ADP/ATP translocase 3 OS=Homo sapiens GN=SLC25A6 PE=1 SV=4	ADT3_HUMAN	33	10.26	Homo sapiens	0	0	0	4	4	0	5	0	4	0	0	0	0	0	0	0	0	0	0.16	0.13	0	0.16	0	0.15	0	0	0	0	0	0	0	0	0	3	2	0	2	0	2	0	0	0	0	0
530	Consortin OS=Homo sapiens GN=CNST PE=1 SV=3	CNST_HUMAN	80	4.14	Homo sapiens	0	0	0	0	0	0	2	0	0	0	0	0	0	0	0	0	0	0	0	0	0	0.021	0	0	0	0	0	0	0	0	0	0	0	0	0	0	2	0	0	0	0	0	0	0
531	Thioredoxin domain-containing protein 5 OS=Homo sapiens GN=TXNDC5 PE=1 SV=2	TXND5_HUMAN	48	5.86	Homo sapiens	0	0	2	2	0	0	0	0	0	0	0	0	0	0	0	0	0	0.06	0.074	0	0	0	0	0	0	0	0	0	0	0	0	0	2	2	0	0	0	0	0	0	0	0	0	0
532	Ras-related protein Ral-B OS=Homo sapiens GN=RALB PE=1 SV=1	RALB_HUMAN	23	6.56	Homo sapiens	2	3	3	2	2	2	2	0	0	0	0	0	0	0	0	0.1	0.15	0.15	0.078	0.11	0.078	0.11	0	0	0	0	0	0	0	0	2	3	3	2	2	2	2	0	0	0	0	0	0	0
533	Caspase-14 OS=Homo sapiens GN=CASP14 PE=1 SV=2	CASPE_HUMAN	28	5.28	Homo sapiens	0	0	0	0	0	0	0	0	0	0	0	0	0	0	0	0	0	0	0	0	0	0	0	0	0	0	0	0	0	0	0	0	0	0	0	0	0	0	0	0	0	0	0	0
534	NAD-dependent malic enzyme, mitochondrial OS=Homo sapiens GN=ME2 PE=1 SV=1	MAOM_HUMAN	65	7.67	Homo sapiens	0	0	2	0	0	0	0	0	0	0	0	0	0	0	0	0	0	0.046	0	0	0	0	0	0	0	0	0	0	0	0	0	0	2	0	0	0	0	0	0	0	0	0	0	0
535	Abhydrolase domain-containing protein 16A OS=Homo sapiens GN=ABHD16A PE=1 SV=3	ABHGA_HUMAN	63	8.2	Homo sapiens	0	0	0	0	0	0	0	0	0	0	0	0	0	0	0	0	0	0	0	0	0	0	0	0	0	0	0	0	0	0	0	0	0	0	0	0	0	0	0	0	0	0	0	0
536	Dematin OS=Homo sapiens GN=DMTN PE=1 SV=3	DEMA_HUMAN	46	9.36	Homo sapiens	0	0	0	0	0	0	0	0	0	0	0	0	0	0	0	0	0	0	0	0	0	0	0	0	0	0	0	0	0	0	0	0	0	0	0	0	0	0	0	0	0	0	0	0
537	Keratin, type I cuticular Ha1 OS=Homo sapiens GN=KRT31 PE=1 SV=3	K1H1_HUMAN	47	4.53	Homo sapiens	0	0	0	0	0	0	0	0	0	0	0	0	0	0	0	0	0	0	0	0	0	0	0	0	0	0	0	0	0	0	0	0	0	0	0	0	0	0	0	0	0	0	0	0
538	Peroxiredoxin-2 OS=Homo sapiens GN=PRDX2 PE=1 SV=5	PRDX2_HUMAN	22	5.76	Homo sapiens	0	0	0	0	0	0	0	0	0	0	0	0	0	0	0	0	0	0	0	0	0	0	0	0	0	0	0	0	0	0	0	0	0	0	0	0	0	0	0	0	0	0	0	0
539	Platelet endothelial aggregation receptor 1 OS=Homo sapiens GN=PEAR1 PE=1 SV=1	PEAR1_HUMAN	111	6.81	Homo sapiens	0	2	2	2	2	2	2	2	2	0	0	0	0	0	0	0	0.026	0.026	0.026	0.026	0.03	0.026	0.026	0.026	0	0	0	0	0	0	0	2	2	2	2	2	2	2	2	0	0	0	0	0
540	Heat shock protein HSP 90-beta OS=Homo sapiens GN=HSP90AB1 PE=1 SV=4	HS90B_HUMAN	83	4.68	Homo sapiens	0	0	0	0	0	4	0	0	0	0	0	0	0	0	0	0	0	0	0	0	0.091	0	0	0	0	0	0	0	0	0	0	0	0	0	0	2	0	0	0	0	0	0	0	0
541	Destrin OS=Homo sapiens GN=DSTN PE=1 SV=3	DEST_HUMAN	19	7.97	Homo sapiens	0	0	0	0	0	0	0	0	0	0	0	0	0	0	0	0	0	0	0	0	0	0	0	0	0	0	0	0	0	0	0	0	0	0	0	0	0	0	0	0	0	0	0	0
542	LIM and SH3 domain protein 1 OS=Homo sapiens GN=LASP1 PE=1 SV=2	LASP1_HUMAN	30	7.07	Homo sapiens	0	0	0	0	0	0	0	0	0	0	0	0	0	0	0	0	0	0	0	0	0	0	0	0	0	0	0	0	0	0	0	0	0	0	0	0	0	0	0	0	0	0	0	0
543	Tissue factor pathway inhibitor OS=Homo sapiens GN=TFPI PE=1 SV=1	TFPI1_HUMAN	35	8.31	Homo sapiens	0	0	0	0	0	0	0	0	0	0	0	0	0	0	0	0	0	0	0	0	0	0	0	0	0	0	0	0	0	0	0	0	0	0	0	0	0	0	0	0	0	0	0	0
544	Phospholipase A2, membrane associated OS=Homo sapiens GN=PLA2G2A PE=1 SV=2	PA2GA_HUMAN	16	9.51	Homo sapiens	0	0	0	0	0	0	0	0	0	0	0	0	0	0	0	0	0	0	0	0	0	0	0	0	0	0	0	0	0	0	0	0	0	0	0	0	0	0	0	0	0	0	0	0
545	Glucose-6-phosphate isomerase OS=Homo sapiens GN=GPI PE=1 SV=4	G6PI_HUMAN	63	8.55	Homo sapiens	0	0	0	0	0	0	0	0	0	0	0	0	0	0	0	0	0	0	0	0	0	0	0	0	0	0	0	0	0	0	0	0	0	0	0	0	0	0	0	0	0	0	0	0
546	Serine/threonine-protein phosphatase PP1-beta catalytic subunit OS=Homo sapiens GN=PPP1CB PE=1 SV=3	PP1B_HUMAN	37	6.06	Homo sapiens	2	2	2	3	2	2	0	0	0	0	0	0	0	0	0	0.092	0.092	0.092	0.14	0.076	0.092	0	0	0	0	0	0	0	0	0	2	2	2	3	2	2	0	0	0	0	0	0	0	0
547	EH domain-containing protein 1 OS=Homo sapiens GN=EHD1 PE=1 SV=2	EHD1_HUMAN	61	6.81	Homo sapiens	0	0	3	0	0	0	0	0	0	0	0	0	0	0	0	0	0	0.086	0	0	0	0	0	0	0	0	0	0	0	0	0	0	2	0	0	0	0	0	0	0	0	0	0	0
548	Succinyl-CoA ligase [ADP-forming] subunit beta, mitochondrial OS=Homo sapiens GN=SUCLA2 PE=1 SV=3	SUCB1_HUMAN	50	7.5	Homo sapiens	2	3	3	0	2	2	0	0	0	0	0	0	0	0	0	0.048	0.069	0.069	0	0.048	0.048	0	0	0	0	0	0	0	0	0	2	3	3	0	2	2	0	0	0	0	0	0	0	0
549	Ig kappa chain V-II region GM607 (Fragment) OS=Homo sapiens PE=4 SV=1	KV205_HUMAN	13	7.25	Homo sapiens	0	0	0	0	0	0	0	0	0	0	0	0	0	0	0	0	0	0	0	0	0	0	0	0	0	0	0	0	0	0	0	0	0	0	0	0	0	0	0	0	0	0	0	0
550	Cadherin-1 OS=Homo sapiens GN=CDH1 PE=1 SV=3	CADH1_HUMAN	97	4.33	Homo sapiens	0	2	0	0	0	0	0	0	0	0	0	0	0	0	0	0	0.022	0	0	0	0	0	0	0	0	0	0	0	0	0	0	2	0	0	0	0	0	0	0	0	0	0	0	0
551	Receptor-type tyrosine-protein phosphatase C OS=Homo sapiens GN=PTPRC PE=1 SV=2	PTPRC_HUMAN	147	6.08	Homo sapiens	0	0	0	0	0	0	0	0	0	0	0	0	0	0	0	0	0	0	0	0	0	0	0	0	0	0	0	0	0	0	0	0	0	0	0	0	0	0	0	0	0	0	0	0
552	Minor histocompatibility protein HA-1 OS=Homo sapiens GN=HMHA1 PE=1 SV=2	HMHA1_HUMAN	125	6	Homo sapiens	0	0	0	0	0	0	0	0	0	0	0	0	0	0	0	0	0	0	0	0	0	0	0	0	0	0	0	0	0	0	0	0	0	0	0	0	0	0	0	0	0	0	0	0
553	Amyloid beta A4 protein OS=Homo sapiens GN=APP PE=1 SV=3	A4_HUMAN	87	4.45	Homo sapiens	0	0	0	2	0	0	2	0	0	0	0	0	0	0	0	0	0	0	0.038	0	0	0.038	0	0	0	0	0	0	0	0	0	0	0	2	0	0	2	0	0	0	0	0	0	0
554	Endothelial cell-selective adhesion molecule OS=Homo sapiens GN=ESAM PE=1 SV=1	ESAM_HUMAN	41	9.75	Homo sapiens	0	0	0	0	0	0	0	0	0	0	0	0	0	0	0	0	0	0	0	0	0	0	0	0	0	0	0	0	0	0	0	0	0	0	0	0	0	0	0	0	0	0	0	0
555	Superoxide dismutase [Cu-Zn] OS=Homo sapiens GN=SOD1 PE=1 SV=2	SODC_HUMAN	16	6.07	Homo sapiens	0	0	0	0	0	0	0	0	0	0	0	0	0	0	0	0	0	0	0	0	0	0	0	0	0	0	0	0	0	0	0	0	0	0	0	0	0	0	0	0	0	0	0	0
556	6-phosphofructokinase type C OS=Homo sapiens GN=PFKP PE=1 SV=2	K6PP_HUMAN	85	7.5	Homo sapiens	0	0	0	0	0	0	0	0	0	0	0	0	0	0	0	0	0	0	0	0	0	0	0	0	0	0	0	0	0	0	0	0	0	0	0	0	0	0	0	0	0	0	0	0
557	Macrophage migration inhibitory factor OS=Homo sapiens GN=MIF PE=1 SV=4	MIF_HUMAN	12	8.05	Homo sapiens	0	0	0	0	0	0	2	0	2	0	0	0	0	0	0	0	0	0	0	0	0	0.17	0	0.17	0	0	0	0	0	0	0	0	0	0	0	0	2	0	2	0	0	0	0	0
558	Transmembrane emp24 domain-containing protein 10 OS=Homo sapiens GN=TMED10 PE=1 SV=2	TMEDA_HUMAN	25	7.55	Homo sapiens	0	0	0	0	0	0	0	2	3	0	0	0	0	0	0	0	0	0	0	0	0	0	0.16	0.16	0	0	0	0	0	0	0	0	0	0	0	0	0	2	3	0	0	0	0	0
559	HLA class I histocompatibility antigen, A-24 alpha chain OS=Homo sapiens GN=HLA-A PE=1 SV=2	1A24_HUMAN	41	6.29	Homo sapiens	0	0	10	10	7	0	0	0	0	0	0	0	0	0	0	0	0	0.39	0.35	0.29	0	0	0	0	0	0	0	0	0	0	0	0	2	2	2	0	0	0	0	0	0	0	0	0
560	Ig kappa chain V-I region AG OS=Homo sapiens PE=1 SV=1	KV101_HUMAN	12	5.77	Homo sapiens	0	0	0	0	0	0	0	0	0	0	0	0	0	0	0	0	0	0	0	0	0	0	0	0	0	0	0	0	0	0	0	0	0	0	0	0	0	0	0	0	0	0	0	0
561	Syntaxin-7 OS=Homo sapiens GN=STX7 PE=1 SV=4	STX7_HUMAN	30	5.24	Homo sapiens	0	0	0	0	0	0	0	0	0	0	0	0	0	0	0	0	0	0	0	0	0	0	0	0	0	0	0	0	0	0	0	0	0	0	0	0	0	0	0	0	0	0	0	0
562	Transaldolase OS=Homo sapiens GN=TALDO1 PE=1 SV=2	TALDO_HUMAN	38	6.8	Homo sapiens	0	0	0	0	0	0	0	0	0	0	0	0	0	0	0	0	0	0	0	0	0	0	0	0	0	0	0	0	0	0	0	0	0	0	0	0	0	0	0	0	0	0	0	0
563	Torsin-4A OS=Homo sapiens GN=TOR4A PE=1 SV=2	TOR4A_HUMAN	47	10.42	Homo sapiens	0	0	0	0	0	0	0	0	0	0	0	0	0	0	0	0	0	0	0	0	0	0	0	0	0	0	0	0	0	0	0	0	0	0	0	0	0	0	0	0	0	0	0	0
564	Histone H1.5 OS=Homo sapiens GN=HIST1H1B PE=1 SV=3	H15_HUMAN	23	11.69	Homo sapiens	0	0	0	0	0	0	0	0	0	0	0	0	0	0	0	0	0	0	0	0	0	0	0	0	0	0	0	0	0	0	0	0	0	0	0	0	0	0	0	0	0	0	0	0
565	Pantetheinase OS=Homo sapiens GN=VNN1 PE=1 SV=2	VNN1_HUMAN	57	5.26	Homo sapiens	0	0	0	0	0	0	0	0	0	0	0	0	0	0	0	0	0	0	0	0	0	0	0	0	0	0	0	0	0	0	0	0	0	0	0	0	0	0	0	0	0	0	0	0
566	Transmembrane protein 40 OS=Homo sapiens GN=TMEM40 PE=1 SV=2	TMM40_HUMAN	25	5.32	Homo sapiens	0	0	0	0	0	0	0	0	2	0	0	0	0	0	0	0	0	0	0	0	0	0	0	0.13	0	0	0	0	0	0	0	0	0	0	0	0	0	0	2	0	0	0	0	0
567	Leucine-rich repeat flightless-interacting protein 2 OS=Homo sapiens GN=LRRFIP2 PE=1 SV=1	LRRF2_HUMAN	82	6.94	Homo sapiens	2	3	0	0	0	2	0	0	0	0	0	0	0	0	0	0.042	0.062	0	0	0	0.043	0	0	0	0	0	0	0	0	0	2	3	0	0	0	2	0	0	0	0	0	0	0	0
568	High affinity immunoglobulin epsilon receptor subunit gamma OS=Homo sapiens GN=FCER1G PE=1 SV=1	FCERG_HUMAN	10	7.25	Homo sapiens	0	0	0	0	0	0	0	0	0	0	0	0	0	0	0	0	0	0	0	0	0	0	0	0	0	0	0	0	0	0	0	0	0	0	0	0	0	0	0	0	0	0	0	0
569	Tubulin alpha-1A chain OS=Homo sapiens GN=TUBA1A PE=1 SV=1	TBA1A_HUMAN	50	4.7	Homo sapiens	0	0	0	0	13	15	0	0	0	0	0	0	0	0	0	0	0	0	0	0.34	0.35	0	0	0	0	0	0	0	0	0	0	0	0	0	2	2	0	0	0	0	0	0	0	0
570	Importin subunit beta-1 OS=Homo sapiens GN=KPNB1 PE=1 SV=2	IMB1_HUMAN	97	4.41	Homo sapiens	0	2	2	0	0	0	0	0	2	0	0	0	0	0	0	0	0.024	0.024	0	0	0	0	0	0.024	0	0	0	0	0	0	0	2	2	0	0	0	0	0	2	0	0	0	0	0
571	Pituitary tumor-transforming gene 1 protein-interacting protein OS=Homo sapiens GN=PTTG1IP PE=1 SV=1	PTTG_HUMAN	20	8.89	Homo sapiens	0	0	0	0	0	0	2	2	0	0	0	0	0	0	0	0	0	0	0	0	0	0.072	0.072	0	0	0	0	0	0	0	0	0	0	0	0	0	2	2	0	0	0	0	0	0
572	Annexin A7 OS=Homo sapiens GN=ANXA7 PE=1 SV=3	ANXA7_HUMAN	53	5.32	Homo sapiens	0	0	0	0	0	0	0	0	0	0	0	0	0	0	0	0	0	0	0	0	0	0	0	0	0	0	0	0	0	0	0	0	0	0	0	0	0	0	0	0	0	0	0	0
573	Fatty acid-binding protein, epidermal OS=Homo sapiens GN=FABP5 PE=1 SV=3	FABP5_HUMAN	15	7.05	Homo sapiens	0	0	0	0	0	0	0	0	0	2	0	0	0	0	0	0	0	0	0	0	0	0	0	0	0.17	0	0	0	0	0	0	0	0	0	0	0	0	0	0	2	0	0	0	0
574	Methyltransferase-like protein 7A OS=Homo sapiens GN=METTL7A PE=1 SV=1	MET7A_HUMAN	28	8.47	Homo sapiens	0	0	0	0	0	0	0	0	0	0	0	0	0	0	0	0	0	0	0	0	0	0	0	0	0	0	0	0	0	0	0	0	0	0	0	0	0	0	0	0	0	0	0	0
575	Protein disulfide-isomerase A4 OS=Homo sapiens GN=PDIA4 PE=1 SV=2	PDIA4_HUMAN	73	4.7	Homo sapiens	0	0	2	0	0	0	2	0	0	0	0	0	0	0	0	0	0	0.037	0	0	0	0.042	0	0	0	0	0	0	0	0	0	0	2	0	0	0	2	0	0	0	0	0	0	0
576	Rab GDP dissociation inhibitor alpha OS=Homo sapiens GN=GDI1 PE=1 SV=2	GDIA_HUMAN	51	4.75	Homo sapiens	0	0	0	0	2	0	0	0	0	0	0	0	0	0	0	0	0	0	0	0.047	0	0	0	0	0	0	0	0	0	0	0	0	0	0	2	0	0	0	0	0	0	0	0	0
577	Dehydrogenase/reductase SDR family member 7 OS=Homo sapiens GN=DHRS7 PE=1 SV=1	DHRS7_HUMAN	38	8.47	Homo sapiens	0	0	2	0	0	0	0	0	0	0	0	0	0	0	0	0	0	0.056	0	0	0	0	0	0	0	0	0	0	0	0	0	0	2	0	0	0	0	0	0	0	0	0	0	0
578	Cathepsin G OS=Homo sapiens GN=CTSG PE=1 SV=2	CATG_HUMAN	29	11.69	Homo sapiens	0	0	0	0	0	0	0	0	0	0	0	0	0	0	0	0	0	0	0	0	0	0	0	0	0	0	0	0	0	0	0	0	0	0	0	0	0	0	0	0	0	0	0	0
579	Cytochrome c oxidase subunit 4 isoform 1, mitochondrial OS=Homo sapiens GN=COX4I1 PE=1 SV=1	COX41_HUMAN	20	10.12	Homo sapiens	0	0	0	0	0	0	0	0	0	0	0	0	0	0	0	0	0	0	0	0	0	0	0	0	0	0	0	0	0	0	0	0	0	0	0	0	0	0	0	0	0	0	0	0
580	Lipopolysaccharide-responsive and beige-like anchor protein OS=Homo sapiens GN=LRBA PE=1 SV=4	LRBA_HUMAN	319	5.31	Homo sapiens	0	2	0	0	0	0	0	0	0	0	0	0	0	0	0	0	0.0094	0	0	0	0	0	0	0	0	0	0	0	0	0	0	2	0	0	0	0	0	0	0	0	0	0	0	0
581	Leucine-rich repeat-containing protein 59 OS=Homo sapiens GN=LRRC59 PE=1 SV=1	LRC59_HUMAN	35	10.29	Homo sapiens	0	0	0	0	2	0	0	0	0	0	0	0	0	0	0	0	0	0	0	0.1	0	0	0	0	0	0	0	0	0	0	0	0	0	0	2	0	0	0	0	0	0	0	0	0
582	Elongation factor 1-gamma OS=Homo sapiens GN=EEF1G PE=1 SV=3	EF1G_HUMAN	50	6.64	Homo sapiens	0	2	2	2	3	0	0	0	0	0	0	0	0	0	0	0	0.053	0.053	0.057	0.085	0	0	0	0	0	0	0	0	0	0	0	2	2	2	3	0	0	0	0	0	0	0	0	0
583	Endoplasmic reticulum resident protein 44 OS=Homo sapiens GN=ERP44 PE=1 SV=1	ERP44_HUMAN	47	4.9	Homo sapiens	0	0	3	0	0	0	0	0	0	0	0	0	0	0	0	0	0	0.054	0	0	0	0	0	0	0	0	0	0	0	0	0	0	2	0	0	0	0	0	0	0	0	0	0	0
584	SLAM family member 5 OS=Homo sapiens GN=CD84 PE=1 SV=1	SLAF5_HUMAN	39	7.08	Homo sapiens	0	0	0	0	0	0	0	0	0	0	0	0	0	0	0	0	0	0	0	0	0	0	0	0	0	0	0	0	0	0	0	0	0	0	0	0	0	0	0	0	0	0	0	0
585	Flotillin-2 OS=Homo sapiens GN=FLOT2 PE=1 SV=2	FLOT2_HUMAN	47	4.91	Homo sapiens	2	0	0	0	0	0	0	0	0	0	0	0	0	0	0	0.072	0	0	0	0	0	0	0	0	0	0	0	0	0	0	2	0	0	0	0	0	0	0	0	0	0	0	0	0
586	Sodium/potassium-transporting ATPase subunit alpha-1 OS=Homo sapiens GN=ATP1A1 PE=1 SV=1	AT1A1_HUMAN	113	5.15	Homo sapiens	0	0	0	0	0	0	0	0	0	0	0	0	0	0	0	0	0	0	0	0	0	0	0	0	0	0	0	0	0	0	0	0	0	0	0	0	0	0	0	0	0	0	0	0
587	Collagen alpha-1(VI) chain OS=Homo sapiens GN=COL6A1 PE=1 SV=3	CO6A1_HUMAN	109	5.05	Homo sapiens	0	0	0	0	0	0	0	0	0	0	0	0	0	0	0	0	0	0	0	0	0	0	0	0	0	0	0	0	0	0	0	0	0	0	0	0	0	0	0	0	0	0	0	0
588	Keratin, type II cuticular Hb4 OS=Homo sapiens GN=KRT84 PE=2 SV=2	KRT84_HUMAN	65	7.61	Homo sapiens	0	0	0	0	0	0	0	0	0	0	0	0	0	0	0	0	0	0	0	0	0	0	0	0	0	0	0	0	0	0	0	0	0	0	0	0	0	0	0	0	0	0	0	0
589	Elongation factor 1-delta OS=Homo sapiens GN=EEF1D PE=1 SV=5	EF1D_HUMAN	31	4.63	Homo sapiens	2	2	0	0	0	0	0	0	0	0	0	0	0	0	0	0.13	0.13	0	0	0	0	0	0	0	0	0	0	0	0	0	2	2	0	0	0	0	0	0	0	0	0	0	0	0
590	Ubiquitin-60S ribosomal protein L40 OS=Homo sapiens GN=UBA52 PE=1 SV=2	RL40_HUMAN	15	10.51	Homo sapiens	0	0	0	0	0	0	0	0	0	0	0	0	0	0	0	0	0	0	0	0	0	0	0	0	0	0	0	0	0	0	0	0	0	0	0	0	0	0	0	0	0	0	0	0
591	Membrane-associated progesterone receptor component 1 OS=Homo sapiens GN=PGRMC1 PE=1 SV=3	PGRC1_HUMAN	22	4.3	Homo sapiens	0	0	0	0	0	0	0	0	0	0	0	0	0	0	0	0	0	0	0	0	0	0	0	0	0	0	0	0	0	0	0	0	0	0	0	0	0	0	0	0	0	0	0	0
592	Glucose-6-phosphate 1-dehydrogenase OS=Homo sapiens GN=G6PD PE=1 SV=4	G6PD_HUMAN	59	6.84	Homo sapiens	0	0	0	0	0	0	2	0	0	0	0	0	0	0	0	0	0	0	0	0	0	0.062	0	0	0	0	0	0	0	0	0	0	0	0	0	0	2	0	0	0	0	0	0	0
593	P2X purinoceptor 1 OS=Homo sapiens GN=P2RX1 PE=1 SV=1	P2RX1_HUMAN	45	8.59	Homo sapiens	0	0	0	0	0	0	0	0	0	0	0	0	0	0	0	0	0	0	0	0	0	0	0	0	0	0	0	0	0	0	0	0	0	0	0	0	0	0	0	0	0	0	0	0
594	Dynein light chain 1, cytoplasmic OS=Homo sapiens GN=DYNLL1 PE=1 SV=1	DYL1_HUMAN	10	7.5	Homo sapiens	0	0	0	0	0	0	0	0	0	0	0	0	0	0	0	0	0	0	0	0	0	0	0	0	0	0	0	0	0	0	0	0	0	0	0	0	0	0	0	0	0	0	0	0
595	Tripeptidyl-peptidase 1 OS=Homo sapiens GN=TPP1 PE=1 SV=2	TPP1_HUMAN	61	6.46	Homo sapiens	0	0	0	0	0	0	2	2	2	0	0	0	0	0	0	0	0	0	0	0	0	0.037	0.05	0.037	0	0	0	0	0	0	0	0	0	0	0	0	2	2	2	0	0	0	0	0
596	Azurocidin OS=Homo sapiens GN=AZU1 PE=1 SV=3	CAP7_HUMAN	27	9.65	Homo sapiens	0	0	0	0	0	0	0	0	0	0	0	0	0	0	0	0	0	0	0	0	0	0	0	0	0	0	0	0	0	0	0	0	0	0	0	0	0	0	0	0	0	0	0	0
597	Extended synaptotagmin-2 OS=Homo sapiens GN=ESYT2 PE=1 SV=1	ESYT2_HUMAN	102	9.8	Homo sapiens	2	0	2	0	0	0	0	0	0	0	0	0	0	0	0	0.024	0	0.024	0	0	0	0	0	0	0	0	0	0	0	0	2	0	2	0	0	0	0	0	0	0	0	0	0	0
598	Succinyl-CoA:3-ketoacid coenzyme A transferase 1, mitochondrial OS=Homo sapiens GN=OXCT1 PE=1 SV=1	SCOT1_HUMAN	56	7.52	Homo sapiens	0	0	0	0	2	0	0	0	0	0	0	0	0	0	0	0	0	0	0	0.046	0	0	0	0	0	0	0	0	0	0	0	0	0	0	2	0	0	0	0	0	0	0	0	0
599	Reelin OS=Homo sapiens GN=RELN PE=1 SV=3	RELN_HUMAN	388	5.74	Homo sapiens	0	0	0	0	0	0	0	0	0	0	0	0	0	0	0	0	0	0	0	0	0	0	0	0	0	0	0	0	0	0	0	0	0	0	0	0	0	0	0	0	0	0	0	0
600	Nidogen-1 OS=Homo sapiens GN=NID1 PE=1 SV=3	NID1_HUMAN	136	4.93	Homo sapiens	0	0	0	0	0	0	0	0	2	0	0	0	0	0	0	0	0	0	0	0	0	0	0	0.022	0	0	0	0	0	0	0	0	0	0	0	0	0	0	2	0	0	0	0	0
601	Cytoskeleton-associated protein 5 OS=Homo sapiens GN=CKAP5 PE=1 SV=3	CKAP5_HUMAN	226	7.88	Homo sapiens	0	0	0	0	0	0	0	0	0	0	0	0	0	0	0	0	0	0	0	0	0	0	0	0	0	0	0	0	0	0	0	0	0	0	0	0	0	0	0	0	0	0	0	0
602	Insulin-like growth factor II OS=Homo sapiens GN=IGF2 PE=1 SV=1	IGF2_HUMAN	20	9.61	Homo sapiens	0	0	0	0	0	0	0	0	0	0	0	0	0	0	0	0	0	0	0	0	0	0	0	0	0	0	0	0	0	0	0	0	0	0	0	0	0	0	0	0	0	0	0	0
603	55 kDa erythrocyte membrane protein OS=Homo sapiens GN=MPP1 PE=1 SV=2	EM55_HUMAN	52	7.42	Homo sapiens	0	0	0	0	0	0	0	2	0	0	0	0	0	0	0	0	0	0	0	0	0	0	0.069	0	0	0	0	0	0	0	0	0	0	0	0	0	0	2	0	0	0	0	0	0
604	Ig lambda-7 chain C region OS=Homo sapiens GN=IGLC7 PE=4 SV=2	LAC7_HUMAN	11	8.48	Homo sapiens	0	0	0	0	0	0	0	0	0	0	0	0	0	0	0	0	0	0	0	0	0	0	0	0	0	0	0	0	0	0	0	0	0	0	0	0	0	0	0	0	0	0	0	0
605	Protein flightless-1 homolog OS=Homo sapiens GN=FLII PE=1 SV=2	FLII_HUMAN	145	5.91	Homo sapiens	0	0	0	0	2	0	0	0	0	0	0	0	0	0	0	0	0	0	0	0.022	0	0	0	0	0	0	0	0	0	0	0	0	0	0	2	0	0	0	0	0	0	0	0	0
606	Glutamate dehydrogenase 1, mitochondrial OS=Homo sapiens GN=GLUD1 PE=1 SV=2	DHE3_HUMAN (+1)	61	7.91	Homo sapiens	0	2	2	0	2	2	0	0	0	0	0	0	0	0	0	0	0.057	0.057	0	0.041	0.041	0	0	0	0	0	0	0	0	0	0	2	2	0	2	2	0	0	0	0	0	0	0	0
607	PRA1 family protein 3 OS=Homo sapiens GN=ARL6IP5 PE=1 SV=1	PRAF3_HUMAN	22	10.28	Homo sapiens	0	0	0	0	0	0	0	0	0	0	0	0	0	0	0	0	0	0	0	0	0	0	0	0	0	0	0	0	0	0	0	0	0	0	0	0	0	0	0	0	0	0	0	0
608	Alpha-1,3-mannosyl-glycoprotein 2-beta-N-acetylglucosaminyltransferase OS=Homo sapiens GN=MGAT1 PE=1 SV=2	MGAT1_HUMAN	51	9.49	Homo sapiens	0	2	0	0	0	0	0	0	0	0	0	0	0	0	0	0	0.056	0	0	0	0	0	0	0	0	0	0	0	0	0	0	2	0	0	0	0	0	0	0	0	0	0	0	0
609	Mitochondrial inner membrane protein OS=Homo sapiens GN=IMMT PE=1 SV=1	IMMT_HUMAN	84	6.08	Homo sapiens	0	0	0	0	0	0	0	0	0	0	0	0	0	0	0	0	0	0	0	0	0	0	0	0	0	0	0	0	0	0	0	0	0	0	0	0	0	0	0	0	0	0	0	0
610	C-type lectin domain family 1 member B OS=Homo sapiens GN=CLEC1B PE=1 SV=2	CLC1B_HUMAN	27	8.62	Homo sapiens	0	0	0	0	0	0	0	0	0	0	0	0	0	0	0	0	0	0	0	0	0	0	0	0	0	0	0	0	0	0	0	0	0	0	0	0	0	0	0	0	0	0	0	0
611	Glutathione S-transferase P OS=Homo sapiens GN=GSTP1 PE=1 SV=2	GSTP1_HUMAN	23	5.3	Homo sapiens	0	2	2	2	0	0	0	0	0	0	0	0	0	0	0	0	0.13	0.13	0.17	0	0	0	0	0	0	0	0	0	0	0	0	2	2	2	0	0	0	0	0	0	0	0	0	0
612	Myotrophin OS=Homo sapiens GN=MTPN PE=1 SV=2	MTPN_HUMAN	13	5.18	Homo sapiens	0	0	0	0	0	0	0	2	0	0	0	0	0	0	0	0	0	0	0	0	0	0	0.29	0	0	0	0	0	0	0	0	0	0	0	0	0	0	2	0	0	0	0	0	0
613	Cytochrome c OS=Homo sapiens GN=CYCS PE=1 SV=2	CYC_HUMAN	12	10.16	Homo sapiens	2	2	2	0	0	0	2	0	0	0	0	0	0	0	0	0.21	0.21	0.21	0	0	0	0.21	0	0	0	0	0	0	0	0	2	2	2	0	0	0	2	0	0	0	0	0	0	0
614	Dihydrolipoyllysine-residue succinyltransferase component of 2-oxoglutarate dehydrogenase complex, mitochondrial OS=Homo sapiens GN=DLST PE=1 SV=4	ODO2_HUMAN	49	9.39	Homo sapiens	0	0	0	0	2	0	0	2	0	0	0	0	0	0	0	0	0	0	0	0.064	0	0	0.055	0	0	0	0	0	0	0	0	0	0	0	2	0	0	2	0	0	0	0	0	0
615	Intelectin-1 OS=Homo sapiens GN=ITLN1 PE=1 SV=1	ITLN1_HUMAN	35	5.66	Homo sapiens	0	0	0	0	0	0	0	0	0	0	0	0	0	0	0	0	0	0	0	0	0	0	0	0	0	0	0	0	0	0	0	0	0	0	0	0	0	0	0	0	0	0	0	0
616	Vesicle-associated membrane protein-associated protein A OS=Homo sapiens GN=VAPA PE=1 SV=3	VAPA_HUMAN	28	8.93	Homo sapiens	0	2	0	0	0	0	0	0	0	0	0	0	0	0	0	0	0.064	0	0	0	0	0	0	0	0	0	0	0	0	0	0	2	0	0	0	0	0	0	0	0	0	0	0	0
617	Keratin, type II cuticular Hb3 OS=Homo sapiens GN=KRT83 PE=1 SV=2	KRT83_HUMAN	54	5.35	Homo sapiens	0	0	0	0	0	0	0	0	0	0	0	0	0	0	0	0	0	0	0	0	0	0	0	0	0	0	0	0	0	0	0	0	0	0	0	0	0	0	0	0	0	0	0	0
618	Reticulon-3 OS=Homo sapiens GN=RTN3 PE=1 SV=2	RTN3_HUMAN	113	4.58	Homo sapiens	0	0	0	0	0	0	0	0	0	0	0	0	0	0	0	0	0	0	0	0	0	0	0	0	0	0	0	0	0	0	0	0	0	0	0	0	0	0	0	0	0	0	0	0
619	Tight junction protein ZO-2 OS=Homo sapiens GN=TJP2 PE=1 SV=2	ZO2_HUMAN	134	7.43	Homo sapiens	0	0	0	0	0	0	0	0	0	0	0	0	0	0	0	0	0	0	0	0	0	0	0	0	0	0	0	0	0	0	0	0	0	0	0	0	0	0	0	0	0	0	0	0
620	Ras-related protein Rab-21 OS=Homo sapiens GN=RAB21 PE=1 SV=3	RAB21_HUMAN	24	8.05	Homo sapiens	0	0	0	0	0	0	0	0	0	0	0	0	0	0	0	0	0	0	0	0	0	0	0	0	0	0	0	0	0	0	0	0	0	0	0	0	0	0	0	0	0	0	0	0
621	Fibrinogen-like protein 1 OS=Homo sapiens GN=FGL1 PE=1 SV=3	FGL1_HUMAN	36	5.67	Homo sapiens	0	0	0	0	0	0	0	0	0	0	0	0	0	0	0	0	0	0	0	0	0	0	0	0	0	0	0	0	0	0	0	0	0	0	0	0	0	0	0	0	0	0	0	0
622	T-complex protein 1 subunit zeta OS=Homo sapiens GN=CCT6A PE=1 SV=3	TCPZ_HUMAN	58	6.65	Homo sapiens	0	2	3	0	0	0	0	0	0	0	0	0	0	0	0	0	0.064	0.087	0	0	0	0	0	0	0	0	0	0	0	0	0	2	3	0	0	0	0	0	0	0	0	0	0	0
623	Cytochrome c oxidase subunit 6B1 OS=Homo sapiens GN=COX6B1 PE=1 SV=2	CX6B1_HUMAN	10	7.13	Homo sapiens	0	0	0	0	0	0	0	0	0	0	0	0	0	0	0	0	0	0	0	0	0	0	0	0	0	0	0	0	0	0	0	0	0	0	0	0	0	0	0	0	0	0	0	0
624	Disheveled-associated activator of morphogenesis 1 OS=Homo sapiens GN=DAAM1 PE=1 SV=2	DAAM1_HUMAN	123	7.24	Homo sapiens	0	0	0	0	2	0	0	0	0	0	0	0	0	0	0	0	0	0	0	0.023	0	0	0	0	0	0	0	0	0	0	0	0	0	0	2	0	0	0	0	0	0	0	0	0
625	Emerin OS=Homo sapiens GN=EMD PE=1 SV=1	EMD_HUMAN	29	5.17	Homo sapiens	0	0	0	0	0	0	0	0	0	0	0	0	0	0	0	0	0	0	0	0	0	0	0	0	0	0	0	0	0	0	0	0	0	0	0	0	0	0	0	0	0	0	0	0
626	Aspartate aminotransferase, mitochondrial OS=Homo sapiens GN=GOT2 PE=1 SV=3	AATM_HUMAN	48	9.38	Homo sapiens	0	0	0	0	0	0	0	0	2	0	0	0	0	0	0	0	0	0	0	0	0	0	0	0.056	0	0	0	0	0	0	0	0	0	0	0	0	0	0	2	0	0	0	0	0
627	Olfactomedin-4 OS=Homo sapiens GN=OLFM4 PE=1 SV=1	OLFM4_HUMAN	57	5.37	Homo sapiens	0	0	0	0	0	0	0	0	0	0	0	0	0	0	0	0	0	0	0	0	0	0	0	0	0	0	0	0	0	0	0	0	0	0	0	0	0	0	0	0	0	0	0	0
628	Transmembrane protein 109 OS=Homo sapiens GN=TMEM109 PE=1 SV=1	TM109_HUMAN	26	11.09	Homo sapiens	0	0	0	0	0	0	0	2	0	0	0	0	0	0	0	0	0	0	0	0	0	0	0.053	0	0	0	0	0	0	0	0	0	0	0	0	0	0	2	0	0	0	0	0	0
629	Barrier-to-autointegration factor OS=Homo sapiens GN=BANF1 PE=1 SV=1	BAF_HUMAN	10	5.88	Homo sapiens	0	0	0	0	0	0	0	0	0	0	0	0	0	0	0	0	0	0	0	0	0	0	0	0	0	0	0	0	0	0	0	0	0	0	0	0	0	0	0	0	0	0	0	0
630	Tripeptidyl-peptidase 2 OS=Homo sapiens GN=TPP2 PE=1 SV=4	TPP2_HUMAN	138	6.27	Homo sapiens	2	2	2	0	0	0	0	0	0	0	0	0	0	0	0	0.018	0.018	0.018	0	0	0	0	0	0	0	0	0	0	0	0	2	2	2	0	0	0	0	0	0	0	0	0	0	0
631	Nucleoside diphosphate kinase B OS=Homo sapiens GN=NME2 PE=1 SV=1	NDKB_HUMAN	17	8.69	Homo sapiens	0	0	0	0	0	0	0	3	0	0	0	0	0	0	0	0	0	0	0	0	0	0	0.24	0	0	0	0	0	0	0	0	0	0	0	0	0	0	3	0	0	0	0	0	0
632	Ras-related protein Rab-1A OS=Homo sapiens GN=RAB1A PE=1 SV=3	RAB1A_HUMAN	23	6	Homo sapiens	0	0	0	0	0	0	0	0	4	0	0	0	0	0	0	0	0	0	0	0	0	0	0	0.18	0	0	0	0	0	0	0	0	0	0	0	0	0	0	2	0	0	0	0	0
633	FH1/FH2 domain-containing protein 1 OS=Homo sapiens GN=FHOD1 PE=1 SV=3	FHOD1_HUMAN	127	6.33	Homo sapiens	0	0	0	0	0	0	0	0	0	0	0	0	0	0	0	0	0	0	0	0	0	0	0	0	0	0	0	0	0	0	0	0	0	0	0	0	0	0	0	0	0	0	0	0
634	Angiopoietin-related protein 3 OS=Homo sapiens GN=ANGPTL3 PE=1 SV=1	ANGL3_HUMAN	54	6.68	Homo sapiens	0	0	0	0	0	0	0	0	0	0	0	0	0	0	0	0	0	0	0	0	0	0	0	0	0	0	0	0	0	0	0	0	0	0	0	0	0	0	0	0	0	0	0	0
635	ADP-ribosylation factor-like protein 8B OS=Homo sapiens GN=ARL8B PE=1 SV=1	ARL8B_HUMAN	22	8.62	Homo sapiens	0	0	2	0	0	0	0	0	0	0	0	0	0	0	0	0	0	0.1	0	0	0	0	0	0	0	0	0	0	0	0	0	0	2	0	0	0	0	0	0	0	0	0	0	0
636	Coagulation factor VII OS=Homo sapiens GN=F7 PE=1 SV=1	FA7_HUMAN	52	7.23	Homo sapiens	0	0	0	0	0	0	0	0	0	0	0	0	0	0	0	0	0	0	0	0	0	0	0	0	0	0	0	0	0	0	0	0	0	0	0	0	0	0	0	0	0	0	0	0
637	Syntaxin-4 OS=Homo sapiens GN=STX4 PE=1 SV=2	STX4_HUMAN	34	6.2	Homo sapiens	0	0	0	0	0	0	0	0	0	0	0	0	0	0	0	0	0	0	0	0	0	0	0	0	0	0	0	0	0	0	0	0	0	0	0	0	0	0	0	0	0	0	0	0
638	Mannan-binding lectin serine protease 2 OS=Homo sapiens GN=MASP2 PE=1 SV=4	MASP2_HUMAN	76	5.37	Homo sapiens	0	0	0	0	0	0	0	0	0	0	0	0	0	0	0	0	0	0	0	0	0	0	0	0	0	0	0	0	0	0	0	0	0	0	0	0	0	0	0	0	0	0	0	0
639	Angiopoietin-related protein 6 OS=Homo sapiens GN=ANGPTL6 PE=1 SV=1	ANGL6_HUMAN	52	8.64	Homo sapiens	0	0	0	0	0	0	0	0	0	0	0	0	0	0	0	0	0	0	0	0	0	0	0	0	0	0	0	0	0	0	0	0	0	0	0	0	0	0	0	0	0	0	0	0
640	Annexin A5 OS=Homo sapiens GN=ANXA5 PE=1 SV=2	ANXA5_HUMAN	36	4.66	Homo sapiens	0	0	0	0	0	0	0	0	0	0	0	0	0	0	0	0	0	0	0	0	0	0	0	0	0	0	0	0	0	0	0	0	0	0	0	0	0	0	0	0	0	0	0	0
641	Ras-related protein Rab-32 OS=Homo sapiens GN=RAB32 PE=1 SV=3	RAB32_HUMAN	25	6.51	Homo sapiens	0	0	0	0	0	0	0	0	0	0	0	0	0	0	0	0	0	0	0	0	0	0	0	0	0	0	0	0	0	0	0	0	0	0	0	0	0	0	0	0	0	0	0	0
642	E3 ubiquitin-protein ligase TRIM58 OS=Homo sapiens GN=TRIM58 PE=2 SV=2	TRI58_HUMAN	55	6.09	Homo sapiens	0	2	2	0	0	0	0	2	2	0	0	0	0	0	0	0	0.058	0.051	0	0	0	0	0.06	0.06	0	0	0	0	0	0	0	2	2	0	0	0	0	2	2	0	0	0	0	0
643	Versican core protein OS=Homo sapiens GN=VCAN PE=1 SV=3	CSPG2_HUMAN	373	4.15	Homo sapiens	0	0	0	0	0	0	0	0	0	0	0	0	0	0	0	0	0	0	0	0	0	0	0	0	0	0	0	0	0	0	0	0	0	0	0	0	0	0	0	0	0	0	0	0
644	Calcium-transporting ATPase type 2C member 1 OS=Homo sapiens GN=ATP2C1 PE=1 SV=3	AT2C1_HUMAN	101	6.72	Homo sapiens	0	0	2	0	0	0	0	0	0	0	0	0	0	0	0	0	0	0.029	0	0	0	0	0	0	0	0	0	0	0	0	0	0	2	0	0	0	0	0	0	0	0	0	0	0
645	Flavin reductase (NADPH) OS=Homo sapiens GN=BLVRB PE=1 SV=3	BLVRB_HUMAN	22	7.76	Homo sapiens	0	0	0	0	0	0	0	0	0	0	0	0	0	0	0	0	0	0	0	0	0	0	0	0	0	0	0	0	0	0	0	0	0	0	0	0	0	0	0	0	0	0	0	0
646	Transferrin receptor protein 1 OS=Homo sapiens GN=TFRC PE=1 SV=2	TFR1_HUMAN	85	6.58	Homo sapiens	0	0	0	0	0	0	0	0	0	0	0	0	0	0	0	0	0	0	0	0	0	0	0	0	0	0	0	0	0	0	0	0	0	0	0	0	0	0	0	0	0	0	0	0
647	Spectrin beta chain, non-erythrocytic 1 OS=Homo sapiens GN=SPTBN1 PE=1 SV=2	SPTB2_HUMAN	275	5.26	Homo sapiens	2	0	0	0	0	3	0	0	0	0	0	0	0	0	0	0.0076	0	0	0	0	0.016	0	0	0	0	0	0	0	0	0	2	0	0	0	0	2	0	0	0	0	0	0	0	0
648	Sorcin OS=Homo sapiens GN=SRI PE=1 SV=1	SORCN_HUMAN	22	5.2	Homo sapiens	0	0	0	0	0	0	0	0	0	0	0	0	0	0	0	0	0	0	0	0	0	0	0	0	0	0	0	0	0	0	0	0	0	0	0	0	0	0	0	0	0	0	0	0
649	Transmembrane emp24 domain-containing protein 9 OS=Homo sapiens GN=TMED9 PE=1 SV=2	TMED9_HUMAN	27	8.23	Homo sapiens	0	0	0	0	0	0	0	0	0	0	0	0	0	0	0	0	0	0	0	0	0	0	0	0	0	0	0	0	0	0	0	0	0	0	0	0	0	0	0	0	0	0	0	0
650	Vesicular integral-membrane protein VIP36 OS=Homo sapiens GN=LMAN2 PE=1 SV=1	LMAN2_HUMAN	40	6.95	Homo sapiens	0	0	0	0	0	0	0	0	0	0	0	0	0	0	0	0	0	0	0	0	0	0	0	0	0	0	0	0	0	0	0	0	0	0	0	0	0	0	0	0	0	0	0	0
651	Serine/threonine-protein kinase 24 OS=Homo sapiens GN=STK24 PE=1 SV=1	STK24_HUMAN	49	5.41	Homo sapiens	0	0	0	0	0	0	0	0	0	0	0	0	0	0	0	0	0	0	0	0	0	0	0	0	0	0	0	0	0	0	0	0	0	0	0	0	0	0	0	0	0	0	0	0
652	Plectin OS=Homo sapiens GN=PLEC PE=1 SV=3	PLEC_HUMAN	532	5.76	Homo sapiens	0	0	0	0	0	0	0	0	0	0	0	0	0	0	0	0	0	0	0	0	0	0	0	0	0	0	0	0	0	0	0	0	0	0	0	0	0	0	0	0	0	0	0	0
653	Bactericidal permeability-increasing protein OS=Homo sapiens GN=BPI PE=1 SV=4	BPI_HUMAN	54	9.89	Homo sapiens	0	0	0	0	0	0	0	0	0	0	0	0	0	0	0	0	0	0	0	0	0	0	0	0	0	0	0	0	0	0	0	0	0	0	0	0	0	0	0	0	0	0	0	0
654	Tapasin OS=Homo sapiens GN=TAPBP PE=1 SV=1	TPSN_HUMAN	48	7.17	Homo sapiens	0	0	0	0	0	2	0	0	0	0	0	0	0	0	0	0	0	0	0	0	0.054	0	0	0	0	0	0	0	0	0	0	0	0	0	0	2	0	0	0	0	0	0	0	0
655	Zymogen granule protein 16 homolog B OS=Homo sapiens GN=ZG16B PE=1 SV=3	ZG16B_HUMAN	23	7.63	Homo sapiens	0	0	0	0	0	0	0	0	0	0	0	0	0	0	0	0	0	0	0	0	0	0	0	0	0	0	0	0	0	0	0	0	0	0	0	0	0	0	0	0	0	0	0	0
656	Adenylate kinase 2, mitochondrial OS=Homo sapiens GN=AK2 PE=1 SV=2	KAD2_HUMAN	26	7.97	Homo sapiens	2	0	2	2	0	0	0	0	0	0	0	0	0	0	0	0.088	0	0.092	0.092	0	0	0	0	0	0	0	0	0	0	0	2	0	2	2	0	0	0	0	0	0	0	0	0	0
657	Beta-galactoside alpha-2,6-sialyltransferase 1 OS=Homo sapiens GN=ST6GAL1 PE=1 SV=1	SIAT1_HUMAN	47	9.35	Homo sapiens	0	0	0	0	0	0	0	0	0	0	0	0	0	0	0	0	0	0	0	0	0	0	0	0	0	0	0	0	0	0	0	0	0	0	0	0	0	0	0	0	0	0	0	0
658	Carbonic anhydrase 1 OS=Homo sapiens GN=CA1 PE=1 SV=2	CAH1_HUMAN	29	7.14	Homo sapiens	0	2	0	0	0	0	0	0	0	0	0	0	0	0	0	0	0.11	0	0	0	0	0	0	0	0	0	0	0	0	0	0	2	0	0	0	0	0	0	0	0	0	0	0	0
659	SPARC OS=Homo sapiens GN=SPARC PE=1 SV=1	SPRC_HUMAN	35	4.47	Homo sapiens	0	0	0	0	0	0	0	0	0	0	0	0	0	0	0	0	0	0	0	0	0	0	0	0	0	0	0	0	0	0	0	0	0	0	0	0	0	0	0	0	0	0	0	0
660	Heterogeneous nuclear ribonucleoproteins A2/B1 OS=Homo sapiens GN=HNRNPA2B1 PE=1 SV=2	ROA2_HUMAN	37	9.26	Homo sapiens	0	0	0	0	0	0	0	0	0	0	0	0	0	0	0	0	0	0	0	0	0	0	0	0	0	0	0	0	0	0	0	0	0	0	0	0	0	0	0	0	0	0	0	0
661	Propionyl-CoA carboxylase alpha chain, mitochondrial OS=Homo sapiens GN=PCCA PE=1 SV=4	PCCA_HUMAN	80	7.56	Homo sapiens	0	0	0	0	0	0	0	0	0	0	0	0	0	0	0	0	0	0	0	0	0	0	0	0	0	0	0	0	0	0	0	0	0	0	0	0	0	0	0	0	0	0	0	0
662	Vesicle-trafficking protein SEC22b OS=Homo sapiens GN=SEC22B PE=1 SV=4	SC22B_HUMAN	25	6.92	Homo sapiens	0	0	0	0	0	0	0	0	0	0	0	0	0	0	0	0	0	0	0	0	0	0	0	0	0	0	0	0	0	0	0	0	0	0	0	0	0	0	0	0	0	0	0	0
663	Transmembrane protein 63A OS=Homo sapiens GN=TMEM63A PE=2 SV=3	TM63A_HUMAN	92	6.98	Homo sapiens	0	0	0	0	0	0	0	0	2	0	0	0	0	0	0	0	0	0	0	0	0	0	0	0	0	0	0	0	0	0	0	0	0	0	0	0	0	0	2	0	0	0	0	0
664	Gamma-glutamyltranspeptidase 1 OS=Homo sapiens GN=GGT1 PE=1 SV=2	GGT1_HUMAN	61	7.13	Homo sapiens	0	0	0	0	0	0	0	0	0	0	0	0	0	0	0	0	0	0	0	0	0	0	0	0	0	0	0	0	0	0	0	0	0	0	0	0	0	0	0	0	0	0	0	0
665	Skin-specific protein 32 OS=Homo sapiens GN=XP32 PE=1 SV=1	XP32_HUMAN	26	7.99	Homo sapiens	0	0	0	0	0	0	0	0	0	0	0	0	0	0	0	0	0	0	0	0	0	0	0	0	0	0	0	0	0	0	0	0	0	0	0	0	0	0	0	0	0	0	0	0
666	Vimentin OS=Homo sapiens GN=VIM PE=1 SV=4	VIME_HUMAN	54	4.77	Homo sapiens	0	0	0	0	0	0	0	0	0	0	0	0	0	0	0	0	0	0	0	0	0	0	0	0	0	0	0	0	0	0	0	0	0	0	0	0	0	0	0	0	0	0	0	0
667	Procollagen C-endopeptidase enhancer 1 OS=Homo sapiens GN=PCOLCE PE=1 SV=2	PCOC1_HUMAN	48	7.47	Homo sapiens	0	0	0	0	0	0	0	0	0	0	0	0	0	0	0	0	0	0	0	0	0	0	0	0	0	0	0	0	0	0	0	0	0	0	0	0	0	0	0	0	0	0	0	0
668	Protein MENT OS=Homo sapiens GN=MENT PE=2 SV=1	MENT_HUMAN	37	8.67	Homo sapiens	0	0	0	0	0	0	0	0	0	0	0	0	0	2	0	0	0	0	0	0	0	0	0	0	0	0	0	0	0.088	0	0	0	0	0	0	0	0	0	0	0	0	0	0	2
669	C-Maf-inducing protein OS=Homo sapiens GN=CMIP PE=1 SV=3	CMIP_HUMAN	86	6.68	Homo sapiens	0	0	0	0	0	0	0	0	0	0	0	0	0	0	0	0	0	0	0	0	0	0	0	0	0	0	0	0	0	0	0	0	0	0	0	0	0	0	0	0	0	0	0	0
670	Thyroxine-binding globulin OS=Homo sapiens GN=SERPINA7 PE=1 SV=2	THBG_HUMAN	46	6.27	Homo sapiens	0	0	0	0	0	0	0	0	0	0	0	0	0	0	0	0	0	0	0	0	0	0	0	0	0	0	0	0	0	0	0	0	0	0	0	0	0	0	0	0	0	0	0	0
671	Glutathione reductase, mitochondrial OS=Homo sapiens GN=GSR PE=1 SV=2	GSHR_HUMAN	56	8.66	Homo sapiens	0	0	0	0	0	0	0	0	0	0	0	0	0	0	0	0	0	0	0	0	0	0	0	0	0	0	0	0	0	0	0	0	0	0	0	0	0	0	0	0	0	0	0	0
672	Protein-glutamine gamma-glutamyltransferase E OS=Homo sapiens GN=TGM3 PE=1 SV=4	TGM3_HUMAN	77	5.6	Homo sapiens	0	0	0	0	0	0	0	0	0	0	0	0	0	0	0	0	0	0	0	0	0	0	0	0	0	0	0	0	0	0	0	0	0	0	0	0	0	0	0	0	0	0	0	0
673	Blood group Rh(CE) polypeptide OS=Homo sapiens GN=RHCE PE=1 SV=2	RHCE_HUMAN	46	9.71	Homo sapiens	0	0	0	0	0	0	0	0	0	0	0	0	0	0	0	0	0	0	0	0	0	0	0	0	0	0	0	0	0	0	0	0	0	0	0	0	0	0	0	0	0	0	0	0
674	Mannose-binding protein C OS=Homo sapiens GN=MBL2 PE=1 SV=2	MBL2_HUMAN	26	5.14	Homo sapiens	0	0	0	0	0	0	0	0	0	0	0	0	0	0	0	0	0	0	0	0	0	0	0	0	0	0	0	0	0	0	0	0	0	0	0	0	0	0	0	0	0	0	0	0
675	Sushi domain-containing protein 1 OS=Homo sapiens GN=SUSD1 PE=1 SV=1	SUSD1_HUMAN	83	6.4	Homo sapiens	0	2	2	0	0	0	0	0	0	0	0	0	0	0	0	0	0.033	0.033	0	0	0	0	0	0	0	0	0	0	0	0	0	2	2	0	0	0	0	0	0	0	0	0	0	0
676	Single-stranded DNA-binding protein, mitochondrial OS=Homo sapiens GN=SSBP1 PE=1 SV=1	SSBP_HUMAN	17	10.04	Homo sapiens	0	2	0	0	0	0	0	0	0	0	0	0	0	0	0	0	0.16	0	0	0	0	0	0	0	0	0	0	0	0	0	0	2	0	0	0	0	0	0	0	0	0	0	0	0
677	Hypoxia up-regulated protein 1 OS=Homo sapiens GN=HYOU1 PE=1 SV=1	HYOU1_HUMAN	111	4.88	Homo sapiens	0	0	0	0	0	0	0	0	0	0	0	0	0	0	0	0	0	0	0	0	0	0	0	0	0	0	0	0	0	0	0	0	0	0	0	0	0	0	0	0	0	0	0	0
678	CD99 antigen OS=Homo sapiens GN=CD99 PE=1 SV=1	CD99_HUMAN	19	4.34	Homo sapiens	0	0	0	0	0	0	0	0	0	0	0	0	0	0	0	0	0	0	0	0	0	0	0	0	0	0	0	0	0	0	0	0	0	0	0	0	0	0	0	0	0	0	0	0
679	Retinoic acid receptor responder protein 2 OS=Homo sapiens GN=RARRES2 PE=1 SV=1	RARR2_HUMAN	19	9.47	Homo sapiens	0	0	0	0	0	0	0	0	0	0	0	0	0	0	0	0	0	0	0	0	0	0	0	0	0	0	0	0	0	0	0	0	0	0	0	0	0	0	0	0	0	0	0	0
680	Vesicle-associated membrane protein-associated protein B/C OS=Homo sapiens GN=VAPB PE=1 SV=3	VAPB_HUMAN	27	7.39	Homo sapiens	0	0	0	0	0	0	0	0	2	0	0	0	0	0	0	0	0	0	0	0	0	0	0	0.086	0	0	0	0	0	0	0	0	0	0	0	0	0	0	2	0	0	0	0	0
681	Hepatocyte growth factor-like protein OS=Homo sapiens GN=MST1 PE=1 SV=2	HGFL_HUMAN	80	7.71	Homo sapiens	0	0	0	0	0	0	0	0	0	0	0	0	0	0	0	0	0	0	0	0	0	0	0	0	0	0	0	0	0	0	0	0	0	0	0	0	0	0	0	0	0	0	0	0
682	Tetraspanin-9 OS=Homo sapiens GN=TSPAN9 PE=1 SV=1	TSN9_HUMAN	27	7.74	Homo sapiens	0	0	0	0	0	0	0	0	0	0	0	0	0	0	0	0	0	0	0	0	0	0	0	0	0	0	0	0	0	0	0	0	0	0	0	0	0	0	0	0	0	0	0	0
683	ES1 protein homolog, mitochondrial OS=Homo sapiens GN=C21orf33 PE=1 SV=3	ES1_HUMAN	28	8.4	Homo sapiens	0	0	0	0	0	0	0	0	2	0	0	0	0	0	0	0	0	0	0	0	0	0	0	0.086	0	0	0	0	0	0	0	0	0	0	0	0	0	0	2	0	0	0	0	0
684	T-complex protein 1 subunit delta OS=Homo sapiens GN=CCT4 PE=1 SV=4	TCPD_HUMAN	58	7.94	Homo sapiens	0	0	0	0	0	0	0	0	0	0	0	0	0	0	0	0	0	0	0	0	0	0	0	0	0	0	0	0	0	0	0	0	0	0	0	0	0	0	0	0	0	0	0	0
685	Receptor expression-enhancing protein 5 OS=Homo sapiens GN=REEP5 PE=1 SV=3	REEP5_HUMAN	21	8.29	Homo sapiens	0	0	0	0	0	0	0	0	0	0	0	0	0	0	0	0	0	0	0	0	0	0	0	0	0	0	0	0	0	0	0	0	0	0	0	0	0	0	0	0	0	0	0	0
686	Caspase-3 OS=Homo sapiens GN=CASP3 PE=1 SV=2	CASP3_HUMAN	32	6.51	Homo sapiens	0	0	0	0	0	0	0	0	0	0	0	0	0	0	0	0	0	0	0	0	0	0	0	0	0	0	0	0	0	0	0	0	0	0	0	0	0	0	0	0	0	0	0	0
687	Leukocyte cell-derived chemotaxin-2 OS=Homo sapiens GN=LECT2 PE=1 SV=2	LECT2_HUMAN	16	9.79	Homo sapiens	0	0	0	0	0	0	0	0	0	0	0	0	0	0	0	0	0	0	0	0	0	0	0	0	0	0	0	0	0	0	0	0	0	0	0	0	0	0	0	0	0	0	0	0
688	Alpha-adducin OS=Homo sapiens GN=ADD1 PE=1 SV=2	ADDA_HUMAN	81	5.61	Homo sapiens	0	0	0	0	0	0	0	0	0	0	0	0	0	0	0	0	0	0	0	0	0	0	0	0	0	0	0	0	0	0	0	0	0	0	0	0	0	0	0	0	0	0	0	0
689	Aldehyde dehydrogenase family 16 member A1 OS=Homo sapiens GN=ALDH16A1 PE=1 SV=2	A16A1_HUMAN	85	6.77	Homo sapiens	2	0	0	0	0	0	0	0	0	0	0	0	0	0	0	0.027	0	0	0	0	0	0	0	0	0	0	0	0	0	0	2	0	0	0	0	0	0	0	0	0	0	0	0	0
690	Mitochondrial 2-oxoglutarate/malate carrier protein OS=Homo sapiens GN=SLC25A11 PE=1 SV=3	M2OM_HUMAN	34	10.4	Homo sapiens	0	0	0	0	0	0	0	0	0	0	0	0	0	0	0	0	0	0	0	0	0	0	0	0	0	0	0	0	0	0	0	0	0	0	0	0	0	0	0	0	0	0	0	0
691	Lysosomal protective protein OS=Homo sapiens GN=CTSA PE=1 SV=2	PPGB_HUMAN	54	6.59	Homo sapiens	0	0	0	0	0	0	0	0	0	0	0	0	0	0	0	0	0	0	0	0	0	0	0	0	0	0	0	0	0	0	0	0	0	0	0	0	0	0	0	0	0	0	0	0
692	Keratin, type II cytoskeletal 3 OS=Homo sapiens GN=KRT3 PE=1 SV=3	K2C3_HUMAN	64	6.41	Homo sapiens	0	0	0	0	0	0	0	0	0	0	0	0	0	0	0	0	0	0	0	0	0	0	0	0	0	0	0	0	0	0	0	0	0	0	0	0	0	0	0	0	0	0	0	0
693	IgGFc-binding protein OS=Homo sapiens GN=FCGBP PE=1 SV=3	FCGBP_HUMAN	572	4.99	Homo sapiens	0	0	0	0	0	0	0	0	0	0	0	0	0	0	0	0	0	0	0	0	0	0	0	0	0	0	0	0	0	0	0	0	0	0	0	0	0	0	0	0	0	0	0	0
694	Propionyl-CoA carboxylase beta chain, mitochondrial OS=Homo sapiens GN=PCCB PE=1 SV=3	PCCB_HUMAN	58	7.7	Homo sapiens	0	0	0	0	0	0	0	0	0	0	0	0	0	0	0	0	0	0	0	0	0	0	0	0	0	0	0	0	0	0	0	0	0	0	0	0	0	0	0	0	0	0	0	0
695	Programmed cell death 6-interacting protein OS=Homo sapiens GN=PDCD6IP PE=1 SV=1	PDC6I_HUMAN	96	6.46	Homo sapiens	0	0	0	0	0	0	0	0	0	0	0	0	0	0	0	0	0	0	0	0	0	0	0	0	0	0	0	0	0	0	0	0	0	0	0	0	0	0	0	0	0	0	0	0
696	Cornulin OS=Homo sapiens GN=CRNN PE=1 SV=1	CRNN_HUMAN	54	6.04	Homo sapiens	0	0	0	0	0	0	0	0	0	0	2	0	0	0	0	0	0	0	0	0	0	0	0	0	0	0.12	0	0	0	0	0	0	0	0	0	0	0	0	0	0	2	0	0	0
697	CKLF-like MARVEL transmembrane domain-containing protein 5 OS=Homo sapiens GN=CMTM5 PE=1 SV=2	CKLF5_HUMAN	25	6.62	Homo sapiens	0	0	0	0	0	0	0	0	0	0	0	0	0	0	0	0	0	0	0	0	0	0	0	0	0	0	0	0	0	0	0	0	0	0	0	0	0	0	0	0	0	0	0	0
698	Cystatin-A OS=Homo sapiens GN=CSTA PE=1 SV=1	CYTA_HUMAN	11	5.17	Homo sapiens	0	0	0	0	0	0	0	0	0	0	0	0	0	0	0	0	0	0	0	0	0	0	0	0	0	0	0	0	0	0	0	0	0	0	0	0	0	0	0	0	0	0	0	0
699	Ig delta chain C region OS=Homo sapiens GN=IGHD PE=1 SV=2	IGHD_HUMAN	42	8.02	Homo sapiens	0	0	0	0	0	0	0	0	0	0	0	0	0	0	0	0	0	0	0	0	0	0	0	0	0	0	0	0	0	0	0	0	0	0	0	0	0	0	0	0	0	0	0	0
700	Keratin, type I cytoskeletal 18 OS=Homo sapiens GN=KRT18 PE=1 SV=2	K1C18_HUMAN	48	5.11	Homo sapiens	0	0	0	0	0	0	0	0	0	0	0	0	0	0	0	0	0	0	0	0	0	0	0	0	0	0	0	0	0	0	0	0	0	0	0	0	0	0	0	0	0	0	0	0
701	Transketolase OS=Homo sapiens GN=TKT PE=1 SV=3	TKT_HUMAN	68	7.73	Homo sapiens	0	0	0	0	0	0	0	0	0	0	0	0	0	0	0	0	0	0	0	0	0	0	0	0	0	0	0	0	0	0	0	0	0	0	0	0	0	0	0	0	0	0	0	0
702	Beta-1,4-galactosyltransferase 1 OS=Homo sapiens GN=B4GALT1 PE=1 SV=5	B4GT1_HUMAN	44	8.78	Homo sapiens	0	2	0	0	0	0	0	0	0	0	0	0	0	0	0	0	0.04	0	0	0	0	0	0	0	0	0	0	0	0	0	0	2	0	0	0	0	0	0	0	0	0	0	0	0
703	Protein S100-A11 OS=Homo sapiens GN=S100A11 PE=1 SV=2	S10AB_HUMAN	12	7.25	Homo sapiens	0	0	0	0	0	0	0	0	0	0	0	0	0	0	0	0	0	0	0	0	0	0	0	0	0	0	0	0	0	0	0	0	0	0	0	0	0	0	0	0	0	0	0	0
704	Small integral membrane protein 1 OS=Homo sapiens GN=SMIM1 PE=1 SV=1	SMIM1_HUMAN	9	9.26	Homo sapiens	0	0	0	0	0	0	0	0	0	0	0	0	0	0	0	0	0	0	0	0	0	0	0	0	0	0	0	0	0	0	0	0	0	0	0	0	0	0	0	0	0	0	0	0
705	Ribonuclease inhibitor OS=Homo sapiens GN=RNH1 PE=1 SV=2	RINI_HUMAN	50	4.44	Homo sapiens	0	0	0	0	0	0	0	0	0	0	0	0	0	0	0	0	0	0	0	0	0	0	0	0	0	0	0	0	0	0	0	0	0	0	0	0	0	0	0	0	0	0	0	0
706	Prenylcysteine oxidase-like OS=Homo sapiens GN=PCYOX1L PE=1 SV=2	PCYXL_HUMAN	55	7.34	Homo sapiens	0	0	0	0	2	0	0	0	0	0	0	0	0	0	0	0	0	0	0	0.071	0	0	0	0	0	0	0	0	0	0	0	0	0	0	2	0	0	0	0	0	0	0	0	0
707	Cytochrome c oxidase subunit 7A2, mitochondrial OS=Homo sapiens GN=COX7A2 PE=1 SV=1	CX7A2_HUMAN	9	10.27	Homo sapiens	0	0	0	0	0	0	0	0	0	0	0	0	0	0	0	0	0	0	0	0	0	0	0	0	0	0	0	0	0	0	0	0	0	0	0	0	0	0	0	0	0	0	0	0
708	V-type proton ATPase catalytic subunit A OS=Homo sapiens GN=ATP6V1A PE=1 SV=2	VATA_HUMAN	68	5.16	Homo sapiens	0	0	0	2	0	0	0	0	0	0	0	0	0	0	0	0	0	0	0.057	0	0	0	0	0	0	0	0	0	0	0	0	0	0	2	0	0	0	0	0	0	0	0	0	0
709	Eukaryotic translation initiation factor 5A-1 OS=Homo sapiens GN=EIF5A PE=1 SV=2	IF5A1_HUMAN	17	4.86	Homo sapiens	0	0	0	0	0	0	0	0	0	0	0	0	0	0	0	0	0	0	0	0	0	0	0	0	0	0	0	0	0	0	0	0	0	0	0	0	0	0	0	0	0	0	0	0
710	Serine protease HTRA1 OS=Homo sapiens GN=HTRA1 PE=1 SV=1	HTRA1_HUMAN	51	7.89	Homo sapiens	0	0	0	0	0	0	0	0	0	0	0	0	0	0	0	0	0	0	0	0	0	0	0	0	0	0	0	0	0	0	0	0	0	0	0	0	0	0	0	0	0	0	0	0
711	Sulfide:quinone oxidoreductase, mitochondrial OS=Homo sapiens GN=SQRDL PE=1 SV=1	SQRD_HUMAN	50	9.51	Homo sapiens	0	0	2	0	0	0	0	0	0	0	0	0	0	0	0	0	0	0.062	0	0	0	0	0	0	0	0	0	0	0	0	0	0	2	0	0	0	0	0	0	0	0	0	0	0
712	GTP-binding nuclear protein Ran OS=Homo sapiens GN=RAN PE=1 SV=3	RAN_HUMAN	24	7.59	Homo sapiens	0	0	0	0	0	0	0	0	0	0	0	0	0	0	0	0	0	0	0	0	0	0	0	0	0	0	0	0	0	0	0	0	0	0	0	0	0	0	0	0	0	0	0	0
713	Arachidonate 5-lipoxygenase-activating protein OS=Homo sapiens GN=ALOX5AP PE=1 SV=2	AL5AP_HUMAN	18	8.64	Homo sapiens	0	0	0	0	0	0	0	0	0	0	0	0	0	0	0	0	0	0	0	0	0	0	0	0	0	0	0	0	0	0	0	0	0	0	0	0	0	0	0	0	0	0	0	0
714	Tricarboxylate transport protein, mitochondrial OS=Homo sapiens GN=SLC25A1 PE=1 SV=2	TXTP_HUMAN	34	10.44	Homo sapiens	0	2	0	0	0	0	0	0	0	0	0	0	0	0	0	0	0.074	0	0	0	0	0	0	0	0	0	0	0	0	0	0	2	0	0	0	0	0	0	0	0	0	0	0	0
715	Eosinophil peroxidase OS=Homo sapiens GN=EPX PE=1 SV=2	PERE_HUMAN	81	10.81	Homo sapiens	0	0	0	0	0	0	0	0	0	0	0	0	0	0	0	0	0	0	0	0	0	0	0	0	0	0	0	0	0	0	0	0	0	0	0	0	0	0	0	0	0	0	0	0
716	Na(+)/H(+) exchange regulatory cofactor NHE-RF1 OS=Homo sapiens GN=SLC9A3R1 PE=1 SV=4	NHRF1_HUMAN	39	5.52	Homo sapiens	0	0	0	0	0	0	0	0	0	0	0	0	0	0	0	0	0	0	0	0	0	0	0	0	0	0	0	0	0	0	0	0	0	0	0	0	0	0	0	0	0	0	0	0
717	Periostin OS=Homo sapiens GN=POSTN PE=1 SV=2	POSTN_HUMAN	93	7.59	Homo sapiens	0	0	0	0	0	0	0	0	0	0	0	0	0	0	0	0	0	0	0	0	0	0	0	0	0	0	0	0	0	0	0	0	0	0	0	0	0	0	0	0	0	0	0	0
718	Connective tissue growth factor OS=Homo sapiens GN=CTGF PE=1 SV=2	CTGF_HUMAN	38	8.03	Homo sapiens	0	0	0	0	0	0	0	0	0	0	0	0	0	0	0	0	0	0	0	0	0	0	0	0	0	0	0	0	0	0	0	0	0	0	0	0	0	0	0	0	0	0	0	0
719	Endothelin-converting enzyme 1 OS=Homo sapiens GN=ECE1 PE=1 SV=2	ECE1_HUMAN	87	5.68	Homo sapiens	0	0	0	0	0	0	0	0	0	0	0	0	0	0	0	0	0	0	0	0	0	0	0	0	0	0	0	0	0	0	0	0	0	0	0	0	0	0	0	0	0	0	0	0
720	Histidine triad nucleotide-binding protein 2, mitochondrial OS=Homo sapiens GN=HINT2 PE=1 SV=1	HINT2_HUMAN	17	9.61	Homo sapiens	0	0	0	0	0	0	0	2	0	0	0	0	0	0	0	0	0	0	0	0	0	0	0.2	0	0	0	0	0	0	0	0	0	0	0	0	0	0	2	0	0	0	0	0	0
721	Rho GTPase-activating protein 1 OS=Homo sapiens GN=ARHGAP1 PE=1 SV=1	RHG01_HUMAN	50	6.24	Homo sapiens	0	0	0	0	0	0	0	0	0	0	0	0	0	0	0	0	0	0	0	0	0	0	0	0	0	0	0	0	0	0	0	0	0	0	0	0	0	0	0	0	0	0	0	0
722	Protein disulfide-isomerase A5 OS=Homo sapiens GN=PDIA5 PE=1 SV=1	PDIA5_HUMAN	60	8	Homo sapiens	0	0	0	0	0	0	0	0	0	0	0	0	0	0	0	0	0	0	0	0	0	0	0	0	0	0	0	0	0	0	0	0	0	0	0	0	0	0	0	0	0	0	0	0
723	Protein phosphatase 1 regulatory subunit 12A OS=Homo sapiens GN=PPP1R12A PE=1 SV=1	MYPT1_HUMAN	115	5.06	Homo sapiens	0	0	0	0	0	0	0	0	0	0	0	0	0	0	0	0	0	0	0	0	0	0	0	0	0	0	0	0	0	0	0	0	0	0	0	0	0	0	0	0	0	0	0	0
724	Macrophage receptor MARCO OS=Homo sapiens GN=MARCO PE=1 SV=1	MARCO_HUMAN	53	9.15	Homo sapiens	0	0	0	0	0	0	0	0	0	0	0	0	0	0	0	0	0	0	0	0	0	0	0	0	0	0	0	0	0	0	0	0	0	0	0	0	0	0	0	0	0	0	0	0
725	Insulin-like growth factor-binding protein 2 OS=Homo sapiens GN=IGFBP2 PE=1 SV=2	IBP2_HUMAN	35	7.53	Homo sapiens	0	0	0	0	0	0	0	0	0	0	0	0	0	0	0	0	0	0	0	0	0	0	0	0	0	0	0	0	0	0	0	0	0	0	0	0	0	0	0	0	0	0	0	0
726	G-protein coupled receptor family C group 5 member C OS=Homo sapiens GN=GPRC5C PE=1 SV=2	GPC5C_HUMAN	48	8.52	Homo sapiens	0	0	0	0	0	0	0	0	0	0	0	0	0	0	0	0	0	0	0	0	0	0	0	0	0	0	0	0	0	0	0	0	0	0	0	0	0	0	0	0	0	0	0	0
727	UDP-glucose:glycoprotein glucosyltransferase 1 OS=Homo sapiens GN=UGGT1 PE=1 SV=3	UGGG1_HUMAN	177	5.32	Homo sapiens	0	2	0	0	0	0	0	0	0	0	0	0	0	0	0	0	0.015	0	0	0	0	0	0	0	0	0	0	0	0	0	0	2	0	0	0	0	0	0	0	0	0	0	0	0
728	PDZ and LIM domain protein 7 OS=Homo sapiens GN=PDLIM7 PE=1 SV=1	PDLI7_HUMAN	50	8.49	Homo sapiens	0	0	0	0	0	0	0	0	0	0	0	0	0	0	0	0	0	0	0	0	0	0	0	0	0	0	0	0	0	0	0	0	0	0	0	0	0	0	0	0	0	0	0	0
729	Peroxiredoxin-5, mitochondrial OS=Homo sapiens GN=PRDX5 PE=1 SV=4	PRDX5_HUMAN	22	8.97	Homo sapiens	0	0	0	0	0	0	0	0	0	0	0	0	0	0	0	0	0	0	0	0	0	0	0	0	0	0	0	0	0	0	0	0	0	0	0	0	0	0	0	0	0	0	0	0
730	Proprotein convertase subtilisin/kexin type 9 OS=Homo sapiens GN=PCSK9 PE=1 SV=3	PCSK9_HUMAN	74	6.59	Homo sapiens	0	0	0	0	0	0	0	0	0	0	0	0	0	0	0	0	0	0	0	0	0	0	0	0	0	0	0	0	0	0	0	0	0	0	0	0	0	0	0	0	0	0	0	0
731	Probable hydrolase PNKD OS=Homo sapiens GN=PNKD PE=1 SV=2	PNKD_HUMAN	43	9.37	Homo sapiens	0	0	2	0	0	0	0	0	0	0	0	0	0	0	0	0	0	0.094	0	0	0	0	0	0	0	0	0	0	0	0	0	0	2	0	0	0	0	0	0	0	0	0	0	0
732	Vascular non-inflammatory molecule 2 OS=Homo sapiens GN=VNN2 PE=1 SV=3	VNN2_HUMAN	59	6.5	Homo sapiens	0	0	0	0	0	0	0	0	0	0	0	0	0	0	0	0	0	0	0	0	0	0	0	0	0	0	0	0	0	0	0	0	0	0	0	0	0	0	0	0	0	0	0	0
733	Carboxypeptidase M OS=Homo sapiens GN=CPM PE=1 SV=2	CBPM_HUMAN	51	7.4	Homo sapiens	0	0	0	0	0	0	0	0	0	0	0	0	0	0	0	0	0	0	0	0	0	0	0	0	0	0	0	0	0	0	0	0	0	0	0	0	0	0	0	0	0	0	0	0
734	T-complex protein 1 subunit alpha OS=Homo sapiens GN=TCP1 PE=1 SV=1	TCPA_HUMAN	60	5.96	Homo sapiens	0	0	0	2	0	0	0	0	0	0	0	0	0	0	0	0	0	0	0.04	0	0	0	0	0	0	0	0	0	0	0	0	0	0	2	0	0	0	0	0	0	0	0	0	0
735	Heterogeneous nuclear ribonucleoprotein U OS=Homo sapiens GN=HNRNPU PE=1 SV=6	HNRPU_HUMAN	91	5.8	Homo sapiens	0	0	0	0	0	0	0	0	0	0	0	0	0	0	0	0	0	0	0	0	0	0	0	0	0	0	0	0	0	0	0	0	0	0	0	0	0	0	0	0	0	0	0	0
736	Collagen alpha-1(XVIII) chain OS=Homo sapiens GN=COL18A1 PE=1 SV=5	COIA1_HUMAN	178	5.89	Homo sapiens	0	0	0	0	0	0	0	0	0	0	0	0	0	0	0	0	0	0	0	0	0	0	0	0	0	0	0	0	0	0	0	0	0	0	0	0	0	0	0	0	0	0	0	0
737	Ficolin-1 OS=Homo sapiens GN=FCN1 PE=1 SV=2	FCN1_HUMAN	35	6.85	Homo sapiens	0	0	0	0	0	0	0	0	0	0	0	0	0	0	0	0	0	0	0	0	0	0	0	0	0	0	0	0	0	0	0	0	0	0	0	0	0	0	0	0	0	0	0	0
738	Lactadherin OS=Homo sapiens GN=MFGE8 PE=1 SV=2	MFGM_HUMAN	43	8.21	Homo sapiens	0	0	0	0	0	0	0	0	0	0	0	0	0	0	0	0	0	0	0	0	0	0	0	0	0	0	0	0	0	0	0	0	0	0	0	0	0	0	0	0	0	0	0	0
739	Grancalcin OS=Homo sapiens GN=GCA PE=1 SV=2	GRAN_HUMAN	24	4.82	Homo sapiens	0	0	0	0	0	0	0	0	0	0	0	0	0	0	0	0	0	0	0	0	0	0	0	0	0	0	0	0	0	0	0	0	0	0	0	0	0	0	0	0	0	0	0	0
[truncated: 278 more columns]

## Sheet: RPA by 5 indiv
						DOPG_CTRL
						Spectral counts															Spectral counts / MW															RPA%
						DOPG_CTRL_1			DOPG_CTRL_2			DOPG_CTRL_3			DOPG_CTRL_4			DOPG_CTRL_5																		78.12	84.9674	88.4152	79.7119	73.8726	78.9978	73.1268	73.5708	77.1917	75.0925	70.7425	78.0799	75.4087	82.6431
#	Identified Proteins (739)	Accession Number	Molecular Weight /kDa	pI	Taxonomy	2016-03-08_DOPG_CTRL_A_01	2016-03-08_DOPG_CTRL_A_02	2016-03-08_DOPG_CTRL_A_03	2016-03-08_DOPG_CTRL_B_01	2016-03-08_DOPG_CTRL_B_02	2016-03-08_DOPG_CTRL_B_03	2016-03-08_DOPG_CTRL_C_01	2016-03-08_DOPG_CTRL_C_02	2016-03-08_DOPG_CTRL_C_03	2016-07-12_DOPG_CTRL_D_01	2016-07-12_DOPG_CTRL_D_02	2016-07-12_DOPG_CTRL_D_03	2016-07-12_DOPG_CTRL_E_01	2016-07-12_DOPG_CTRL_E_02	2016-07-12_DOPG_CTRL_E_03	2016-03-08_DOPG_CTRL_A_01	2016-03-08_DOPG_CTRL_A_02	2016-03-08_DOPG_CTRL_A_03	2016-03-08_DOPG_CTRL_B_01	2016-03-08_DOPG_CTRL_B_02	2016-03-08_DOPG_CTRL_B_03	2016-03-08_DOPG_CTRL_C_01	2016-03-08_DOPG_CTRL_C_02	2016-03-08_DOPG_CTRL_C_03	2016-07-12_DOPG_CTRL_D_01	2016-07-12_DOPG_CTRL_D_02	2016-07-12_DOPG_CTRL_D_03	2016-07-12_DOPG_CTRL_E_01	2016-07-12_DOPG_CTRL_E_02	2016-07-12_DOPG_CTRL_E_03	2016-03-08_DOPG_CTRL_A_01	2016-03-08_DOPG_CTRL_A_02	2016-03-08_DOPG_CTRL_A_03	2016-03-08_DOPG_CTRL_B_01	2016-03-08_DOPG_CTRL_B_02	2016-03-08_DOPG_CTRL_B_03	2016-03-08_DOPG_CTRL_C_01	2016-03-08_DOPG_CTRL_C_02	2016-03-08_DOPG_CTRL_C_03	2016-07-12_DOPG_CTRL_D_01	2016-07-12_DOPG_CTRL_D_02	2016-07-12_DOPG_CTRL_D_03	2016-07-12_DOPG_CTRL_E_01	2016-07-12_DOPG_CTRL_E_02
1	Apolipoprotein B-100 OS=Homo sapiens GN=APOB PE=1 SV=2	APOB_HUMAN	516	7.04	Homo sapiens	136	140	145	102	108	108	101	106	118	629	591	681	633	640	699	0.263566	0.271318	0.281008	0.197674	0.209302	0.209302	0.195736	0.205426	0.228682	1.21899	1.14535	1.31977	1.22674	1.24031	1.35465	0.00337386	0.0031932	0.00317828	0.00247986	0.00283329	0.00264947	0.00267667	0.00279223	0.00296252	0.0162332	0.0161904	0.0169028	0.0162679	0.015008
2	Complement C3 OS=Homo sapiens GN=C3 PE=1 SV=2	CO3_HUMAN	187	6.34	Homo sapiens	104	115	120	108	99	106	80	91	94	758	665	863	785	754	810	0.55615	0.614973	0.641711	0.57754	0.529412	0.566845	0.427807	0.486631	0.502674	4.05348	3.55615	4.61497	4.19786	4.03209	4.33155	0.00711917	0.00723775	0.00725793	0.00724535	0.00716655	0.00717545	0.00585021	0.00661446	0.00651202	0.0539797	0.0502689	0.0591058	0.0556681	0.0487892
3	Serum albumin OS=Homo sapiens GN=ALB PE=1 SV=2	ALBU_HUMAN	69	6.21	Homo sapiens	218	231	232	228	214	214	180	175	184	326	298	394	316	506	585	3.15942	3.34783	3.36232	3.30435	3.10145	3.10145	2.6087	2.53623	2.66667	4.72464	4.31884	5.71014	4.57971	7.33333	8.47826	0.0404431	0.0394013	0.0380288	0.0414536	0.0419838	0.0392599	0.0356736	0.0344734	0.034546	0.0629175	0.0610502	0.0731321	0.0607319	0.088735
4	Fibrinogen beta chain OS=Homo sapiens GN=FGB PE=1 SV=2	FIBB_HUMAN	56	8.38	Homo sapiens	75	79	71	87	94	93	91	78	87	97	88	118	102	113	128	1.33929	1.41071	1.26786	1.55357	1.67857	1.66071	1.625	1.39286	1.55357	1.73214	1.57143	2.10714	1.82143	2.01786	2.28571	0.0171439	0.016603	0.0143398	0.0194898	0.0227225	0.0210223	0.0222217	0.0189322	0.0201261	0.0230668	0.0222134	0.026987	0.0241541	0.0244165
5	Fibrinogen alpha chain OS=Homo sapiens GN=FGA PE=1 SV=2	FIBA_HUMAN	95	5.87	Homo sapiens	71	78	82	80	78	87	101	100	111	79	75	84	83	96	103	0.747368	0.821053	0.863158	0.842105	0.821053	0.915789	1.06316	1.05263	1.16842	0.831579	0.789474	0.884211	0.873684	1.01053	1.08421	0.00956692	0.00966314	0.00976256	0.0105644	0.0111144	0.0115926	0.0145385	0.0143077	0.0151366	0.0110741	0.0111598	0.0113244	0.011586	0.0122276
6	Myosin-9 OS=Homo sapiens GN=MYH9 PE=1 SV=4	MYH9_HUMAN	227	5.29	Homo sapiens	172	184	201	172	186	173	188	171	193	0	0	0	0	0	0	0.757709	0.810573	0.885463	0.757709	0.819383	0.762115	0.828194	0.753304	0.85022	0	0	0	0	0	0	0.00969929	0.0095398	0.0100148	0.0095056	0.0110918	0.00964729	0.0113254	0.0102392	0.0110144	0	0	0	0	0
7	Beta-2-glycoprotein 1 OS=Homo sapiens GN=APOH PE=1 SV=3	APOH_HUMAN	38	8.03	Homo sapiens	75	87	104	98	85	97	82	84	96	17	20	21	22	23	24	1.97368	2.28947	2.73684	2.57895	2.23684	2.55263	2.15789	2.21053	2.52632	0.447368	0.526316	0.552632	0.578947	0.605263	0.631579	0.0252648	0.0269453	0.0309544	0.0323534	0.0302797	0.0323127	0.0295089	0.0300463	0.0327278	0.00595756	0.00743988	0.00707777	0.00767746	0.00732382
8	Filamin-A OS=Homo sapiens GN=FLNA PE=1 SV=4	FLNA_HUMAN	281	5.95	Homo sapiens	109	129	122	113	107	119	111	113	112	0	0	0	0	0	0	0.3879	0.459075	0.434164	0.402135	0.380783	0.423488	0.395018	0.402135	0.398577	0	0	0	0	0	0	0.00496544	0.00540295	0.00491051	0.00504486	0.00515459	0.00536075	0.00540182	0.00546597	0.00516346	0	0	0	0	0
9	Fibrinogen gamma chain OS=Homo sapiens GN=FGG PE=1 SV=3	FIBG_HUMAN	52	5.32	Homo sapiens	60	55	63	62	63	58	61	56	65	68	68	66	65	70	80	1.15385	1.05769	1.21154	1.19231	1.21154	1.11538	1.17308	1.07692	1.25	1.30769	1.30769	1.26923	1.25	1.34615	1.53846	0.0147702	0.0124482	0.0137028	0.0149577	0.0164004	0.0141192	0.0160417	0.0146379	0.0161934	0.0174144	0.0184852	0.0162555	0.0165763	0.0162888
10	Complement C4-B OS=Homo sapiens GN=C4B PE=1 SV=2	CO4B_HUMAN	193	7.28	Homo sapiens	96	97	90	88	77	76	77	75	80	131	135	144	149	129	138	0.497409	0.502591	0.466321	0.455959	0.398964	0.393782	0.398964	0.388601	0.414508	0.678756	0.699482	0.746114	0.772021	0.668394	0.715026	0.00636724	0.0059151	0.00527422	0.00572008	0.0054007	0.00498472	0.00545578	0.005282	0.00536985	0.00903893	0.00988772	0.00955578	0.0102378	0.00808772
11	Talin-1 OS=Homo sapiens GN=TLN1 PE=1 SV=3	TLN1_HUMAN	270	5.94	Homo sapiens	104	119	113	127	110	129	116	118	120	0	0	0	0	0	0	0.385185	0.440741	0.418519	0.47037	0.407407	0.477778	0.42963	0.437037	0.444444	0	0	0	0	0	0	0.00493068	0.00518717	0.00473356	0.00590088	0.005515	0.00604799	0.00587513	0.00594036	0.00575767	0	0	0	0	0
12	Fibronectin OS=Homo sapiens GN=FN1 PE=1 SV=4	FINC_HUMAN	263	5.45	Homo sapiens	25	25	24	20	21	18	22	18	13	90	88	93	98	94	94	0.095057	0.095057	0.0912548	0.0760456	0.0798479	0.0684411	0.0836502	0.0684411	0.0494297	0.342205	0.334601	0.353612	0.372624	0.357414	0.357414	0.00121681	0.00111875	0.00103212	0.000954006	0.00108089	0.000866367	0.00114391	0.000930275	0.000640349	0.00455711	0.00472984	0.00452885	0.00494139	0.0043248
13	Alpha-2-macroglobulin OS=Homo sapiens GN=A2M PE=1 SV=3	A2MG_HUMAN	163	6.43	Homo sapiens	20	28	26	25	23	23	18	16	13	55	56	72	56	80	80	0.122699	0.171779	0.159509	0.153374	0.141104	0.141104	0.110429	0.0981595	0.0797546	0.337423	0.343558	0.441718	0.343558	0.490798	0.490798	0.00157065	0.00202171	0.00180409	0.00192411	0.0019101	0.00178618	0.00151011	0.00133422	0.0010332	0.00449343	0.00485646	0.00565725	0.00455595	0.00593876
14	Complement factor H OS=Homo sapiens GN=CFH PE=1 SV=4	CFAH_HUMAN	139	6.59	Homo sapiens	39	42	38	40	41	43	36	41	36	60	58	66	62	60	56	0.280576	0.302158	0.273381	0.28777	0.294964	0.309353	0.258993	0.294964	0.258993	0.431655	0.417266	0.47482	0.446043	0.431655	0.402878	0.00359159	0.00355617	0.00309202	0.00361012	0.00399287	0.00391596	0.00354169	0.00400926	0.00335519	0.0057483	0.00589838	0.00608121	0.00591501	0.00522312
15	Keratin, type II cytoskeletal 1 OS=Homo sapiens GN=KRT1 PE=1 SV=6	K2C1_HUMAN	66	8.33	Homo sapiens	54	52	54	34	38	39	55	53	52	78	71	74	71	49	52	0.818182	0.787879	0.818182	0.515152	0.575758	0.590909	0.833333	0.80303	0.787879	1.18182	1.07576	1.12121	1.07576	0.742424	0.787879	0.0104734	0.00927271	0.00925386	0.00646267	0.00779393	0.00748007	0.0113957	0.0109151	0.0102068	0.0157382	0.0152067	0.0143598	0.0142657	0.0089835
16	Serotransferrin OS=Homo sapiens GN=TF PE=1 SV=3	TRFE_HUMAN	77	7.13	Homo sapiens	49	48	49	48	43	45	44	39	43	68	67	76	80	110	111	0.636364	0.623377	0.636364	0.623377	0.558442	0.584416	0.571429	0.506494	0.558442	0.883117	0.87013	0.987013	1.03896	1.42857	1.44156	0.00814597	0.00733665	0.00719745	0.00782037	0.00755952	0.00739787	0.00781421	0.00688444	0.00723447	0.0117604	0.0123	0.0126411	0.0137777	0.017286
17	Ig mu chain C region OS=Homo sapiens GN=IGHM PE=1 SV=3	IGHM_HUMAN	49	6.77	Homo sapiens	61	55	55	51	56	52	50	48	48	46	42	45	48	45	49	1.2449	1.12245	1.12245	1.04082	1.14286	1.06122	1.02041	0.979592	0.979592	0.938776	0.857143	0.918367	0.979592	0.918367	1	0.0159357	0.0132103	0.0126952	0.0130572	0.0154706	0.0134336	0.013954	0.013315	0.0126904	0.0125016	0.0121164	0.0117619	0.0129904	0.0111125
18	Apolipoprotein A-I OS=Homo sapiens GN=APOA1 PE=1 SV=1	APOA1_HUMAN	31	5.5	Homo sapiens	27	28	27	19	21	19	31	36	33	69	57	75	70	74	78	0.870968	0.903226	0.870968	0.612903	0.677419	0.612903	1	1.16129	1.06452	2.22581	1.83871	2.41935	2.25806	2.3871	2.51613	0.0111491	0.0106303	0.00985089	0.00768898	0.0091701	0.00775848	0.0136749	0.0157847	0.0137905	0.0296408	0.0259916	0.0309856	0.0299444	0.0288844
19	Keratin, type I cytoskeletal 9 OS=Homo sapiens GN=KRT9 PE=1 SV=3	K1C9_HUMAN	62	4.89	Homo sapiens	30	30	35	22	21	21	35	42	37	50	49	50	46	31	33	0.483871	0.483871	0.564516	0.354839	0.33871	0.33871	0.564516	0.677419	0.596774	0.806452	0.790323	0.806452	0.741935	0.5	0.532258	0.00619394	0.00569478	0.00638483	0.00445152	0.00458505	0.00428758	0.00771969	0.00920773	0.00773106	0.0107394	0.0111718	0.0103285	0.00983886	0.00605011
20	Ig gamma-1 chain C region OS=Homo sapiens GN=IGHG1 PE=1 SV=1	IGHG1_HUMAN	36	8.31	Homo sapiens	27	31	31	35	24	30	30	26	23	55	52	67	62	76	76	0.75	0.861111	0.861111	0.972222	0.666667	0.833333	0.833333	0.722222	0.638889	1.52778	1.44444	1.86111	1.72222	2.11111	2.11111	0.00960061	0.0101346	0.00973941	0.0121967	0.00902454	0.0105488	0.0113957	0.0098167	0.00827665	0.0203453	0.0204183	0.023836	0.0228385	0.0255449
21	Actin, cytoplasmic 1 OS=Homo sapiens GN=ACTB PE=1 SV=1	ACTB_HUMAN	42	5.15	Homo sapiens	58	66	84	79	73	82	66	70	68	6	8	7	7	6	8	1.38095	1.57143	2	1.88095	1.7381	1.95238	1.57143	1.66667	1.61905	0.142857	0.190476	0.166667	0.166667	0.142857	0.190476	0.0176773	0.0184945	0.0226206	0.0235969	0.0235283	0.0247144	0.0214891	0.0226539	0.0209744	0.00190241	0.00269253	0.00213457	0.00221018	0.0017286
22	Apolipoprotein E OS=Homo sapiens GN=APOE PE=1 SV=1	APOE_HUMAN	36	5.42	Homo sapiens	22	21	23	22	24	22	20	19	26	51	58	62	58	49	57	0.611111	0.583333	0.638889	0.611111	0.666667	0.611111	0.555556	0.527778	0.722222	1.41667	1.61111	1.72222	1.61111	1.36111	1.58333	0.00782272	0.00686537	0.00722601	0.0076665	0.00902454	0.0077358	0.00759715	0.00717374	0.00935621	0.0188656	0.0227743	0.0220572	0.0213651	0.0164698
23	Alpha-1-antitrypsin OS=Homo sapiens GN=SERPINA1 PE=1 SV=3	A1AT_HUMAN	47	5.31	Homo sapiens	23	28	27	21	20	19	20	23	22	42	43	48	47	66	70	0.489362	0.595745	0.574468	0.446809	0.425532	0.404255	0.425532	0.489362	0.468085	0.893617	0.914894	1.02128	1	1.40426	1.48936	0.00626423	0.00701145	0.00649739	0.00560529	0.00576035	0.0051173	0.00581909	0.00665158	0.00606393	0.0119002	0.0129327	0.0130799	0.0132611	0.0169918
24	Haptoglobin OS=Homo sapiens GN=HP PE=1 SV=1	HPT_HUMAN	45	6.56	Homo sapiens	16	17	21	17	14	18	15	15	16	42	40	45	38	61	63	0.355556	0.377778	0.466667	0.377778	0.311111	0.4	0.333333	0.333333	0.355556	0.933333	0.888889	1	0.844444	1.35556	1.4	0.0045514	0.00444615	0.00527813	0.00473929	0.00421145	0.00506343	0.00455829	0.00453079	0.00460613	0.0124291	0.0125651	0.0128074	0.0111982	0.0164025
25	Thrombospondin-1 OS=Homo sapiens GN=THBS1 PE=1 SV=2	TSP1_HUMAN	129	4.51	Homo sapiens	56	61	61	50	51	49	46	51	54	0	0	0	0	0	0	0.434109	0.472868	0.472868	0.387597	0.395349	0.379845	0.356589	0.395349	0.418605	0	0	0	0	0	0	0.00555694	0.00556529	0.00534827	0.00486247	0.00535176	0.0048083	0.00487631	0.00537372	0.00542292	0	0	0	0	0
26	Apolipoprotein(a) OS=Homo sapiens GN=LPA PE=1 SV=1	APOA_HUMAN	501	5.77	Homo sapiens	19	30	29	23	22	23	18	16	14	106	95	114	117	120	118	0.0379242	0.0598802	0.0578842	0.0459082	0.0439122	0.0459082	0.0359281	0.0319361	0.0279441	0.211577	0.189621	0.227545	0.233533	0.239521	0.235529	0.00048546	0.000704743	0.000654687	0.000575927	0.000594431	0.000581132	0.000491313	0.000434087	0.000362009	0.00281755	0.00268044	0.00291426	0.0030969	0.00289826
27	Apolipoprotein A-IV OS=Homo sapiens GN=APOA4 PE=1 SV=3	APOA4_HUMAN	45	5.05	Homo sapiens	20	20	25	22	18	20	25	22	25	35	34	33	28	34	38	0.444444	0.444444	0.555556	0.488889	0.4	0.444444	0.555556	0.488889	0.555556	0.777778	0.755556	0.733333	0.622222	0.755556	0.844444	0.00568925	0.00523076	0.00628349	0.0061332	0.00541473	0.00562603	0.00759715	0.00664515	0.00719709	0.0103576	0.0106804	0.00939209	0.00825133	0.00914239
28	C4b-binding protein alpha chain OS=Homo sapiens GN=C4BPA PE=1 SV=2	C4BPA_HUMAN	67	7.31	Homo sapiens	27	29	32	21	19	18	17	19	19	51	50	58	59	51	52	0.402985	0.432836	0.477612	0.313433	0.283582	0.268657	0.253731	0.283582	0.283582	0.761194	0.746269	0.865672	0.880597	0.761194	0.776119	0.00515854	0.00509414	0.00540192	0.00393207	0.0038388	0.00340081	0.00346974	0.00385455	0.00367374	0.0101367	0.0105491	0.011087	0.0116777	0.00921062
29	Keratin, type I cytoskeletal 10 OS=Homo sapiens GN=KRT10 PE=1 SV=6	K1C10_HUMAN	59	4.88	Homo sapiens	23	24	27	9	13	12	22	21	21	38	40	45	37	29	27	0.389831	0.40678	0.457627	0.152542	0.220339	0.20339	0.372881	0.355932	0.355932	0.644068	0.677966	0.762712	0.627119	0.491525	0.457627	0.00499015	0.00478748	0.00517589	0.00191367	0.00298269	0.00257463	0.0050991	0.00483796	0.00461101	0.00857699	0.00958358	0.00976835	0.00831626	0.00594757
30	Inter-alpha-trypsin inhibitor heavy chain H4 OS=Homo sapiens GN=ITIH4 PE=1 SV=4	ITIH4_HUMAN	103	6.97	Homo sapiens	48	46	52	44	42	39	37	44	39	35	26	36	33	42	46	0.466019	0.446602	0.504854	0.427184	0.407767	0.378641	0.359223	0.427184	0.378641	0.339806	0.252427	0.349515	0.320388	0.407767	0.446602	0.00596543	0.00525615	0.00571004	0.00535911	0.00551987	0.00479305	0.00491233	0.00580644	0.0049052	0.00452516	0.00356825	0.00447637	0.00424869	0.00493407
31	Coagulation factor V OS=Homo sapiens GN=F5 PE=1 SV=4	FA5_HUMAN	252	5.95	Homo sapiens	23	24	28	17	19	21	19	18	22	20	22	21	19	23	20	0.0912698	0.0952381	0.111111	0.0674603	0.0753968	0.0833333	0.0753968	0.0714286	0.0873016	0.0793651	0.0873016	0.0833333	0.0753968	0.0912698	0.0793651	0.00116833	0.00112088	0.0012567	0.000846302	0.00102063	0.00105488	0.00103104	0.000970883	0.00113097	0.0010569	0.00123408	0.00106728	0.000999843	0.00110439
32	Clusterin OS=Homo sapiens GN=CLU PE=1 SV=1	CLUS_HUMAN	52	6.21	Homo sapiens	25	27	27	25	23	25	23	23	27	35	27	32	35	29	31	0.480769	0.519231	0.519231	0.480769	0.442308	0.480769	0.442308	0.442308	0.519231	0.673077	0.519231	0.615385	0.673077	0.557692	0.596154	0.00615424	0.00611094	0.00587264	0.00603134	0.00598744	0.00608585	0.0060485	0.006012	0.00672651	0.0089633	0.00733973	0.00788147	0.00892572	0.0067482
33	von Willebrand factor OS=Homo sapiens GN=VWF PE=1 SV=4	VWF_HUMAN	309	5.15	Homo sapiens	35	39	36	32	30	33	26	25	24	30	32	29	32	41	39	0.113269	0.126214	0.116505	0.10356	0.0970874	0.106796	0.0841424	0.0809061	0.0776699	0.0970874	0.10356	0.0938511	0.10356	0.132686	0.126214	0.00144993	0.00148543	0.0013177	0.00129918	0.00131425	0.00135189	0.00115064	0.00109971	0.00100619	0.0012929	0.0014639	0.00120199	0.00137331	0.00160553
34	Keratin, type II cytoskeletal 2 epidermal OS=Homo sapiens GN=KRT2 PE=1 SV=2	K22E_HUMAN	65	8.17	Homo sapiens	30	29	30	21	20	19	32	30	31	44	42	38	42	22	26	0.461538	0.446154	0.461538	0.323077	0.307692	0.292308	0.492308	0.461538	0.476923	0.676923	0.646154	0.584615	0.646154	0.338462	0.4	0.00590807	0.00525088	0.00522013	0.00405306	0.00416517	0.0037002	0.00673224	0.0062734	0.00617842	0.00901452	0.00913389	0.0074874	0.00856869	0.00409546
35	Plasminogen OS=Homo sapiens GN=PLG PE=1 SV=2	PLMN_HUMAN	91	7.25	Homo sapiens	32	37	41	22	29	30	27	23	20	48	35	38	42	61	61	0.351648	0.406593	0.450549	0.241758	0.318681	0.32967	0.296703	0.252747	0.21978	0.527473	0.384615	0.417582	0.461538	0.67033	0.67033	0.00450138	0.00478528	0.00509584	0.0030329	0.00431393	0.00417316	0.00405738	0.00343543	0.0028472	0.0070243	0.00543684	0.00534814	0.00612049	0.00811114
36	Gelsolin OS=Homo sapiens GN=GSN PE=1 SV=1	GELS_HUMAN	86	6.19	Homo sapiens	32	39	37	42	35	36	35	30	34	32	27	32	42	36	39	0.372093	0.453488	0.430233	0.488372	0.406977	0.418605	0.406977	0.348837	0.395349	0.372093	0.313953	0.372093	0.488372	0.418605	0.453488	0.00476309	0.0053372	0.00486605	0.00612672	0.00550917	0.00529894	0.00556535	0.00474152	0.00512165	0.00495513	0.00443798	0.00476554	0.00647634	0.00506521
37	Ig kappa chain C region OS=Homo sapiens GN=IGKC PE=1 SV=1	IGKC_HUMAN	12	5.68	Homo sapiens	16	21	18	24	23	18	18	22	17	32	25	30	32	39	40	1.33333	1.75	1.5	2	1.91667	1.5	1.5	1.83333	1.41667	2.66667	2.08333	2.5	2.66667	3.25	3.33333	0.0170677	0.0205961	0.0169654	0.0250904	0.0259456	0.0189879	0.0205123	0.0249193	0.0183526	0.0355117	0.0294495	0.0320185	0.0353629	0.0393257
38	Integrin beta-3 OS=Homo sapiens GN=ITGB3 PE=1 SV=2	ITB3_HUMAN	87	4.85	Homo sapiens	30	36	43	42	41	43	41	45	33	0	2	3	5	2	2	0.344828	0.413793	0.494253	0.482759	0.471264	0.494253	0.471264	0.517241	0.37931	0	0.0229885	0.0344828	0.0574713	0.0229885	0.0229885	0.00441407	0.00487002	0.00559014	0.0060563	0.00637942	0.00625654	0.00644448	0.00703053	0.00491387	0	0.00032496	0.000441634	0.00076213	0.000278166
39	Integrin alpha-IIb OS=Homo sapiens GN=ITGA2B PE=1 SV=3	ITA2B_HUMAN	113	5.03	Homo sapiens	31	30	33	32	28	28	30	26	29	0	0	3	0	3	3	0.274336	0.265487	0.292035	0.283186	0.247788	0.247788	0.265487	0.230088	0.256637	0	0	0.0265487	0	0.0265487	0.0265487	0.00351173	0.00312457	0.003303	0.00355262	0.00335426	0.00313664	0.0036305	0.00312745	0.00332467	0	0	0.000340019	0	0.000321245
40	Complement C5 OS=Homo sapiens GN=C5 PE=1 SV=4	CO5_HUMAN	188	6.49	Homo sapiens	3	6	6	3	2	3	0	0	3	84	78	85	79	86	89	0.0159574	0.0319149	0.0319149	0.0159574	0.0106383	0.0159574	0	0	0.0159574	0.446809	0.414894	0.452128	0.420213	0.457447	0.473404	0.000204268	0.000375613	0.000360966	0.000200189	0.000144009	0.000201999	0	0	0.000206725	0.00595011	0.00586484	0.00579058	0.00557247	0.00553521
41	Complement component C9 OS=Homo sapiens GN=C9 PE=1 SV=2	CO9_HUMAN	63	5.27	Homo sapiens	31	30	31	26	30	34	27	27	24	49	45	45	51	39	47	0.492063	0.47619	0.492063	0.412698	0.47619	0.539683	0.428571	0.428571	0.380952	0.777778	0.714286	0.714286	0.809524	0.619048	0.746032	0.00629881	0.00560439	0.00556537	0.00517738	0.0064461	0.00683161	0.00586066	0.0058253	0.00493514	0.0103576	0.010097	0.00914814	0.0107352	0.00749062
42	Prothrombin OS=Homo sapiens GN=F2 PE=1 SV=2	THRB_HUMAN	70	5.7	Homo sapiens	6	10	11	9	7	10	5	7	2	18	21	23	25	26	30	0.0857143	0.142857	0.157143	0.128571	0.1	0.142857	0.0714286	0.1	0.0285714	0.257143	0.3	0.328571	0.357143	0.371429	0.428571	0.00109721	0.00168132	0.00177733	0.00161295	0.00135368	0.00180837	0.000976777	0.00135924	0.000370136	0.00342435	0.00424073	0.00420814	0.0047361	0.00449437
43	Complement C1q subcomponent subunit B OS=Homo sapiens GN=C1QB PE=1 SV=3	C1QB_HUMAN	27	8.87	Homo sapiens	6	7	5	5	4	3	5	6	7	11	8	6	5	8	7	0.222222	0.259259	0.185185	0.185185	0.148148	0.111111	0.185185	0.222222	0.259259	0.407407	0.296296	0.222222	0.185185	0.296296	0.259259	0.00284462	0.00305128	0.0020945	0.00232318	0.00200545	0.00140651	0.00253238	0.00302052	0.00335864	0.0054254	0.00418838	0.00284609	0.00245575	0.00358525
44	Ig alpha-1 chain C region OS=Homo sapiens GN=IGHA1 PE=1 SV=2	IGHA1_HUMAN	38	6.49	Homo sapiens	14	10	12	18	15	13	15	12	10	21	17	21	20	21	21	0.368421	0.263158	0.315789	0.473684	0.394737	0.342105	0.394737	0.315789	0.263158	0.552632	0.447368	0.552632	0.526316	0.552632	0.552632	0.00471609	0.00309716	0.00357167	0.00594246	0.00534348	0.00433057	0.00539798	0.00429232	0.00340915	0.00735934	0.0063239	0.00707777	0.00697951	0.00668697
45	Inter-alpha-trypsin inhibitor heavy chain H2 OS=Homo sapiens GN=ITIH2 PE=1 SV=2	ITIH2_HUMAN	106	6.85	Homo sapiens	24	22	27	20	21	25	22	19	21	33	32	38	34	37	48	0.226415	0.207547	0.254717	0.188679	0.198113	0.235849	0.207547	0.179245	0.198113	0.311321	0.301887	0.358491	0.320755	0.349057	0.45283	0.0028983	0.00244267	0.00288092	0.00236702	0.00268182	0.00298551	0.00283818	0.00243637	0.00256651	0.00414583	0.0042674	0.00459133	0.00425355	0.00422366
46	Ig gamma-3 chain C region OS=Homo sapiens GN=IGHG3 PE=1 SV=2	IGHG3_HUMAN	41	7.95	Homo sapiens	34	31	33	29	26	28	25	25	25	47	43	44	39	57	60	0.829268	0.756098	0.804878	0.707317	0.634146	0.682927	0.609756	0.609756	0.609756	1.14634	1.04878	1.07317	0.95122	1.39024	1.46341	0.0106153	0.00889867	0.00910339	0.00887342	0.00858432	0.00864488	0.00833834	0.00828802	0.00789924	0.0152657	0.0148253	0.0137445	0.0126142	0.0168223
47	Lipopolysaccharide-binding protein OS=Homo sapiens GN=LBP PE=1 SV=3	LBP_HUMAN	53	6.68	Homo sapiens	14	17	17	18	19	18	16	11	14	13	10	12	12	16	16	0.264151	0.320755	0.320755	0.339623	0.358491	0.339623	0.301887	0.207547	0.264151	0.245283	0.188679	0.226415	0.226415	0.301887	0.301887	0.00338135	0.00377503	0.00362782	0.00426063	0.00485282	0.00429914	0.00412826	0.00282106	0.00342201	0.00326641	0.00266713	0.00289979	0.00300251	0.0036529
48	Vitamin D-binding protein OS=Homo sapiens GN=GC PE=1 SV=1	VTDB_HUMAN	53	5.21	Homo sapiens	14	17	19	14	20	16	17	14	15	16	19	19	15	29	32	0.264151	0.320755	0.358491	0.264151	0.377358	0.301887	0.320755	0.264151	0.283019	0.301887	0.358491	0.358491	0.283019	0.54717	0.603774	0.00338135	0.00377503	0.00405463	0.00331382	0.00510823	0.00382146	0.00438628	0.00359043	0.00366644	0.0040202	0.00506754	0.00459133	0.00375313	0.00662088
49	Vitronectin OS=Homo sapiens GN=VTN PE=1 SV=1	VTNC_HUMAN	54	5.54	Homo sapiens	19	20	16	22	23	22	18	21	22	8	10	12	9	15	13	0.351852	0.37037	0.296296	0.407407	0.425926	0.407407	0.333333	0.388889	0.407407	0.148148	0.185185	0.222222	0.166667	0.277778	0.240741	0.00450399	0.00435897	0.00335119	0.005111	0.00576568	0.0051572	0.00455829	0.00528592	0.00527786	0.00197287	0.00261774	0.00284609	0.00221018	0.00336117
50	Vinculin OS=Homo sapiens GN=VCL PE=1 SV=4	VINC_HUMAN	124	5.33	Homo sapiens	25	32	31	32	23	35	33	28	30	0	0	0	0	0	0	0.201613	0.258065	0.25	0.258065	0.185484	0.282258	0.266129	0.225806	0.241935	0	0	0	0	0	0	0.00258081	0.00303722	0.00282757	0.00323747	0.00251086	0.00357299	0.00363928	0.00306924	0.00313421	0	0	0	0	0
51	Kininogen-1 OS=Homo sapiens GN=KNG1 PE=1 SV=2	KNG1_HUMAN	72	6.8	Homo sapiens	17	21	26	28	22	28	15	20	17	23	22	24	21	23	28	0.236111	0.291667	0.361111	0.388889	0.305556	0.388889	0.208333	0.277778	0.236111	0.319444	0.305556	0.333333	0.291667	0.319444	0.388889	0.00302241	0.00343269	0.00408427	0.00487868	0.00413625	0.00492278	0.00284893	0.00377565	0.00305876	0.00425401	0.00431927	0.00426913	0.00386781	0.00386535
52	Hornerin OS=Homo sapiens GN=HRNR PE=1 SV=2	HORN_HUMAN	282	10.24	Homo sapiens	12	15	15	11	9	8	15	26	21	24	23	23	25	11	16	0.0425532	0.0531915	0.0531915	0.0390071	0.0319149	0.0283688	0.0531915	0.0921986	0.0744681	0.0851064	0.0815603	0.0815603	0.0886525	0.0390071	0.0567376	0.000544715	0.000626022	0.000601611	0.000489351	0.000432026	0.000359109	0.000727387	0.0012532	0.000964716	0.00113335	0.00115292	0.00104457	0.00117563	0.000471995
53	Alpha-actinin-1 OS=Homo sapiens GN=ACTN1 PE=1 SV=2	ACTN1_HUMAN	103	5.07	Homo sapiens	41	39	39	31	39	35	34	31	30	0	0	0	0	0	0	0.398058	0.378641	0.378641	0.300971	0.378641	0.339806	0.330097	0.300971	0.291262	0	0	0	0	0	0	0.00509547	0.0044563	0.00428253	0.00377573	0.00512559	0.00430146	0.00451404	0.0040909	0.00377323	0	0	0	0	0
54	Complement C1r subcomponent OS=Homo sapiens GN=C1R PE=1 SV=2	C1R_HUMAN	80	6.14	Homo sapiens	8	13	11	11	8	11	8	17	15	12	12	11	13	15	18	0.1	0.1625	0.1375	0.1375	0.1	0.1375	0.1	0.2125	0.1875	0.15	0.15	0.1375	0.1625	0.1875	0.225	0.00128008	0.0019125	0.00155516	0.00172496	0.00135368	0.00174055	0.00136749	0.00288838	0.00242902	0.00199754	0.00212037	0.00176102	0.00215492	0.00226879
55	Apolipoprotein D OS=Homo sapiens GN=APOD PE=1 SV=1	APOD_HUMAN	21	4.79	Homo sapiens	5	5	5	5	5	5	6	5	6	12	12	10	10	15	15	0.238095	0.238095	0.238095	0.238095	0.238095	0.238095	0.285714	0.238095	0.285714	0.571429	0.571429	0.47619	0.47619	0.714286	0.714286	0.00304781	0.00280219	0.00269292	0.00298695	0.00322305	0.00301395	0.00390711	0.00323628	0.00370136	0.00760966	0.00807759	0.00609876	0.0063148	0.00864302
56	Ceruloplasmin OS=Homo sapiens GN=CP PE=1 SV=1	CERU_HUMAN	122	5.5	Homo sapiens	8	8	9	7	9	6	6	6	3	37	35	42	34	47	46	0.0655738	0.0655738	0.0737705	0.057377	0.0737705	0.0491803	0.0491803	0.0491803	0.0245902	0.303279	0.286885	0.344262	0.278689	0.385246	0.377049	0.000839397	0.000771752	0.000834365	0.000719806	0.000998618	0.000622553	0.000672535	0.000668477	0.00031856	0.00403873	0.00405535	0.0044091	0.00369571	0.00466156
57	Apolipoprotein C-III OS=Homo sapiens GN=APOC3 PE=1 SV=1	APOC3_HUMAN	11	5.04	Homo sapiens	20	24	21	16	18	19	25	20	18	20	12	14	13	15	16	1.81818	2.18182	1.90909	1.45455	1.63636	1.72727	2.27273	1.81818	1.63636	1.81818	1.09091	1.27273	1.18182	1.36364	1.45455	0.0232742	0.0256783	0.0215923	0.0182475	0.0221512	0.0218648	0.0310793	0.0247134	0.0211987	0.0242126	0.0154208	0.0163003	0.0156722	0.0165003
58	Platelet factor 4 OS=Homo sapiens GN=PF4 PE=1 SV=2	PLF4_HUMAN	11	8.78	Homo sapiens	15	13	15	15	15	13	18	11	17	0	0	0	0	0	0	1.36364	1.18182	1.36364	1.36364	1.36364	1.18182	1.63636	1	1.54545	0	0	0	0	0	0	0.0174557	0.0139091	0.0154231	0.0171071	0.0184593	0.0149601	0.0223771	0.0135924	0.020021	0	0	0	0	0
59	Ig gamma-2 chain C region OS=Homo sapiens GN=IGHG2 PE=1 SV=2	IGHG2_HUMAN	36	7.66	Homo sapiens	26	27	26	22	21	24	19	23	24	56	52	80	77	90	93	0.722222	0.75	0.722222	0.611111	0.583333	0.666667	0.527778	0.638889	0.666667	1.55556	1.44444	2.22222	2.13889	2.5	2.58333	0.00924503	0.00882691	0.00816853	0.0076665	0.00789648	0.00843905	0.00721729	0.00868401	0.0086365	0.0207152	0.0204183	0.0284609	0.028364	0.0302506
60	Keratin, type I cytoskeletal 16 OS=Homo sapiens GN=KRT16 PE=1 SV=4	K1C16_HUMAN	51	4.69	Homo sapiens	11	9	12	9	7	9	12	11	11	37	34	36	39	23	29	0.215686	0.176471	0.235294	0.176471	0.137255	0.176471	0.235294	0.215686	0.215686	0.72549	0.666667	0.705882	0.764706	0.45098	0.568627	0.00276096	0.00207692	0.00266124	0.00221386	0.00185799	0.00223387	0.00321762	0.00293168	0.00279416	0.00966128	0.00942385	0.00904052	0.0101408	0.00545697
61	Apolipoprotein A-II OS=Homo sapiens GN=APOA2 PE=1 SV=1	APOA2_HUMAN	11	6.6	Homo sapiens	8	7	6	6	6	6	7	9	9	15	19	16	16	17	19	0.727273	0.636364	0.545455	0.545455	0.545455	0.545455	0.636364	0.818182	0.818182	1.36364	1.72727	1.45455	1.45455	1.54545	1.72727	0.00930968	0.0074895	0.00616924	0.00684283	0.00738372	0.00690468	0.00870219	0.011121	0.0105993	0.0181594	0.0244163	0.0186289	0.0192888	0.0187004
62	Complement factor H-related protein 5 OS=Homo sapiens GN=CFHR5 PE=1 SV=1	FHR5_HUMAN	64	7.08	Homo sapiens	12	15	13	10	7	9	11	9	11	14	17	19	20	16	17	0.1875	0.234375	0.203125	0.15625	0.109375	0.140625	0.171875	0.140625	0.171875	0.21875	0.265625	0.296875	0.3125	0.25	0.265625	0.00240015	0.00275841	0.0022974	0.00196018	0.00148059	0.00178011	0.00235037	0.00191143	0.0022266	0.00291307	0.00375482	0.0038022	0.00414408	0.00302506
63	Properdin OS=Homo sapiens GN=CFP PE=1 SV=2	PROP_HUMAN	51	7.92	Homo sapiens	4	5	5	6	4	5	6	3	4	33	32	29	26	30	30	0.0784314	0.0980392	0.0980392	0.117647	0.0784314	0.0980392	0.117647	0.0588235	0.0784314	0.647059	0.627451	0.568627	0.509804	0.588235	0.588235	0.00100399	0.00115384	0.00110885	0.0014759	0.00106171	0.00124104	0.00160881	0.00079955	0.00101606	0.00861682	0.00886951	0.00728264	0.00676055	0.00711778
64	Inter-alpha-trypsin inhibitor heavy chain H1 OS=Homo sapiens GN=ITIH1 PE=1 SV=3	ITIH1_HUMAN	101	6.78	Homo sapiens	18	19	21	20	19	17	15	18	19	27	27	29	30	33	29	0.178218	0.188119	0.207921	0.19802	0.188119	0.168317	0.148515	0.178218	0.188119	0.267327	0.267327	0.287129	0.29703	0.326733	0.287129	0.00228133	0.00221401	0.00235164	0.00248419	0.00254653	0.00213065	0.00203092	0.0024224	0.00243703	0.00355996	0.00377887	0.00367737	0.00393893	0.00395354
65	Complement factor H-related protein 1 OS=Homo sapiens GN=CFHR1 PE=1 SV=2	FHR1_HUMAN	38	7.42	Homo sapiens	17	19	22	18	20	20	21	22	19	14	12	14	12	12	9	0.447368	0.5	0.578947	0.473684	0.526316	0.526316	0.552632	0.578947	0.5	0.368421	0.315789	0.368421	0.315789	0.315789	0.236842	0.00572668	0.00588461	0.00654806	0.00594246	0.00712464	0.00666241	0.00755717	0.00786926	0.00647738	0.00490623	0.00446393	0.00471851	0.00418771	0.00382112
66	Multimerin-1 OS=Homo sapiens GN=MMRN1 PE=1 SV=3	MMRN1_HUMAN	138	8.01	Homo sapiens	20	22	23	24	20	26	24	20	23	0	0	0	0	0	0	0.144928	0.15942	0.166667	0.173913	0.144928	0.188406	0.173913	0.144928	0.166667	0	0	0	0	0	0	0.00185519	0.00187625	0.00188505	0.00218177	0.00196186	0.00238495	0.00237824	0.00196991	0.00215913	0	0	0	0	0
67	Immunoglobulin lambda-like polypeptide 5 OS=Homo sapiens GN=IGLL5 PE=2 SV=2	IGLL5_HUMAN	23	9.05	Homo sapiens	8	12	13	13	11	14	8	10	11	16	13	17	18	18	19	0.347826	0.521739	0.565217	0.565217	0.478261	0.608696	0.347826	0.434783	0.478261	0.695652	0.565217	0.73913	0.782609	0.782609	0.826087	0.00445246	0.00614046	0.00639277	0.00709076	0.00647413	0.00770522	0.00475648	0.00590972	0.00619575	0.00926393	0.00798979	0.00946634	0.0103782	0.00946974
68	Complement C1q subcomponent subunit A OS=Homo sapiens GN=C1QA PE=1 SV=2	C1QA_HUMAN	26	9.45	Homo sapiens	2	2	3	2	0	2	2	2	2	3	4	4	4	4	4	0.0769231	0.0769231	0.115385	0.0769231	0	0.0769231	0.0769231	0.0769231	0.0769231	0.115385	0.153846	0.153846	0.153846	0.153846	0.153846	0.000984678	0.000905324	0.00130503	0.000965014	0	0.000973737	0.00105191	0.00104557	0.00099652	0.00153657	0.00217474	0.00197037	0.00204016	0.00186157
69	Erythrocyte band 7 integral membrane protein OS=Homo sapiens GN=STOM PE=1 SV=3	STOM_HUMAN	32	8.07	Homo sapiens	18	18	21	19	15	16	17	17	16	2	0	0	2	0	0	0.5625	0.5625	0.65625	0.59375	0.46875	0.5	0.53125	0.53125	0.5	0.0625	0	0	0.0625	0	0	0.00720046	0.00662018	0.00742237	0.0074487	0.00634538	0.00632929	0.00726478	0.00722094	0.00647738	0.000832306	0	0	0.000828817	0
70	Histidine-rich glycoprotein OS=Homo sapiens GN=HRG PE=1 SV=1	HRG_HUMAN	60	7.52	Homo sapiens	18	21	18	17	17	18	14	16	19	15	12	14	10	19	15	0.3	0.35	0.3	0.283333	0.283333	0.3	0.233333	0.266667	0.316667	0.25	0.2	0.233333	0.166667	0.316667	0.25	0.00384024	0.00411922	0.00339308	0.00355447	0.00383543	0.00379757	0.0031908	0.00362463	0.00410234	0.00332923	0.00282716	0.00298839	0.00221018	0.00383174
71	Serum paraoxonase/arylesterase 1 OS=Homo sapiens GN=PON1 PE=1 SV=3	PON1_HUMAN	40	4.89	Homo sapiens	9	13	14	10	9	12	11	15	14	12	11	14	12	20	20	0.225	0.325	0.35	0.25	0.225	0.3	0.275	0.375	0.35	0.3	0.275	0.35	0.3	0.5	0.5	0.00288018	0.00382499	0.0039586	0.0031363	0.00304578	0.00379757	0.00376059	0.00509713	0.00453416	0.00399507	0.00388734	0.00448259	0.00397832	0.00605011
72	Heparin cofactor 2 OS=Homo sapiens GN=SERPIND1 PE=1 SV=3	HEP2_HUMAN	57	6.89	Homo sapiens	17	17	14	18	18	13	12	16	16	29	25	30	28	37	37	0.298246	0.298246	0.245614	0.315789	0.315789	0.22807	0.210526	0.280702	0.280702	0.508772	0.438596	0.526316	0.491228	0.649123	0.649123	0.00381779	0.00351012	0.00277796	0.00396164	0.00427478	0.00288704	0.00287892	0.0038154	0.00363642	0.00677527	0.0061999	0.00674073	0.00651421	0.00785453
73	Complement C1q subcomponent subunit C OS=Homo sapiens GN=C1QC PE=1 SV=3	C1QC_HUMAN	26	8.58	Homo sapiens	4	4	5	5	5	5	5	6	5	10	12	11	13	8	7	0.153846	0.153846	0.192308	0.192308	0.192308	0.192308	0.192308	0.230769	0.192308	0.384615	0.461538	0.423077	0.5	0.307692	0.269231	0.00196936	0.00181065	0.00217505	0.00241254	0.00260323	0.00243434	0.00262978	0.0031367	0.0024913	0.00512189	0.00652421	0.00541851	0.00663053	0.00372315
74	CD5 antigen-like OS=Homo sapiens GN=CD5L PE=1 SV=1	CD5L_HUMAN	38	5.15	Homo sapiens	9	12	13	12	12	14	12	12	10	12	10	11	12	11	11	0.236842	0.315789	0.342105	0.315789	0.315789	0.368421	0.315789	0.315789	0.263158	0.315789	0.263158	0.289474	0.315789	0.289474	0.289474	0.00303177	0.00371659	0.00386931	0.00396164	0.00427478	0.00466369	0.00431838	0.00429232	0.00340915	0.00420534	0.00371994	0.0037074	0.00418771	0.0035027
75	Complement factor B OS=Homo sapiens GN=CFB PE=1 SV=2	CFAB_HUMAN	86	7.07	Homo sapiens	5	8	8	8	6	5	5	6	4	23	27	23	24	32	30	0.0581395	0.0930233	0.0930233	0.0930233	0.0697674	0.0581395	0.0581395	0.0697674	0.0465116	0.267442	0.313953	0.267442	0.27907	0.372093	0.348837	0.000744233	0.00109481	0.00105212	0.00116699	0.000944429	0.000735964	0.000795051	0.000948304	0.000602547	0.0035615	0.00443798	0.00342523	0.00370076	0.00450241
76	Complement C1s subcomponent OS=Homo sapiens GN=C1S PE=1 SV=1	C1S_HUMAN	77	4.59	Homo sapiens	5	6	6	5	6	4	7	5	8	9	12	13	11	16	12	0.0649351	0.0779221	0.0779221	0.0649351	0.0779221	0.0519481	0.0909091	0.0649351	0.103896	0.116883	0.155844	0.168831	0.142857	0.207792	0.155844	0.000831222	0.000917082	0.00088132	0.000814622	0.00105482	0.000657588	0.00124317	0.000882621	0.00134595	0.00155652	0.00220298	0.00216229	0.00189444	0.00251433
77	Tubulin beta-1 chain OS=Homo sapiens GN=TUBB1 PE=1 SV=1	TBB1_HUMAN	50	4.82	Homo sapiens	26	25	27	24	24	26	23	24	23	0	0	0	0	0	0	0.52	0.5	0.54	0.48	0.48	0.52	0.46	0.48	0.46	0	0	0	0	0	0	0.00665642	0.00588461	0.00610755	0.00602169	0.00649767	0.00658246	0.00629044	0.00652433	0.00595919	0	0	0	0	0
78	Keratin, type II cytoskeletal 6A OS=Homo sapiens GN=KRT6A PE=1 SV=3	K2C6A_HUMAN	60	8.16	Homo sapiens	12	7	8	10	8	8	11	9	9	32	33	32	35	22	23	0.2	0.116667	0.133333	0.166667	0.133333	0.133333	0.183333	0.15	0.15	0.533333	0.55	0.533333	0.583333	0.366667	0.383333	0.00256016	0.00137307	0.00150804	0.00209086	0.00180491	0.00168781	0.00250706	0.00203885	0.00194321	0.00710235	0.00777468	0.00683061	0.00773562	0.00443675
79	Hemoglobin subunit beta OS=Homo sapiens GN=HBB PE=1 SV=2	HBB_HUMAN	16	7.32	Homo sapiens	9	11	11	8	10	8	10	10	13	15	14	13	14	15	18	0.5625	0.6875	0.6875	0.5	0.625	0.5	0.625	0.625	0.8125	0.9375	0.875	0.8125	0.875	0.9375	1.125	0.00720046	0.00809133	0.00777582	0.00627259	0.00846051	0.00632929	0.00854679	0.00849522	0.0105257	0.0124846	0.0123688	0.010406	0.0116034	0.011344
80	Band 3 anion transport protein OS=Homo sapiens GN=SLC4A1 PE=1 SV=3	B3AT_HUMAN	102	4.84	Homo sapiens	10	8	11	8	8	8	6	7	3	3	2	3	3	0	2	0.0980392	0.0784314	0.107843	0.0784314	0.0784314	0.0784314	0.0588235	0.0686275	0.0294118	0.0294118	0.0196078	0.0294118	0.0294118	0	0.0196078	0.00125498	0.000923076	0.00121974	0.000983936	0.00106171	0.00099283	0.000804404	0.000932809	0.000381022	0.000391674	0.000277172	0.000376688	0.000390031	0
81	Hemopexin OS=Homo sapiens GN=HPX PE=1 SV=2	HEMO_HUMAN	52	7.02	Homo sapiens	5	7	7	8	6	6	6	4	6	16	10	14	13	23	22	0.0961538	0.134615	0.134615	0.153846	0.115385	0.115385	0.115385	0.0769231	0.115385	0.307692	0.192308	0.269231	0.25	0.442308	0.423077	0.00123085	0.00158432	0.00152254	0.00193003	0.00156194	0.00146061	0.00157787	0.00104557	0.00149478	0.00409751	0.00271842	0.00344815	0.00331527	0.00535202
82	Alpha-2-HS-glycoprotein OS=Homo sapiens GN=AHSG PE=1 SV=1	FETUA_HUMAN	39	5.52	Homo sapiens	13	17	17	11	13	12	12	14	12	19	21	17	22	20	25	0.333333	0.435897	0.435897	0.282051	0.333333	0.307692	0.307692	0.358974	0.307692	0.487179	0.538462	0.435897	0.564103	0.512821	0.641026	0.00426694	0.00513017	0.00493012	0.00353838	0.00451227	0.00389495	0.00420765	0.00487931	0.00398608	0.00648772	0.00761157	0.00558271	0.0074806	0.00620525
83	Fermitin family homolog 3 OS=Homo sapiens GN=FERMT3 PE=1 SV=1	URP2_HUMAN	76	6.98	Homo sapiens	14	16	17	15	11	10	16	19	15	0	0	0	0	0	0	0.184211	0.210526	0.223684	0.197368	0.144737	0.131579	0.210526	0.25	0.197368	0	0	0	0	0	0	0.00235804	0.00247773	0.00252993	0.00247602	0.00195928	0.0016656	0.00287892	0.00339809	0.00255686	0	0	0	0	0
84	Hemoglobin subunit alpha OS=Homo sapiens GN=HBA1 PE=1 SV=2	HBA_HUMAN	15	9.09	Homo sapiens	10	10	10	9	7	9	13	9	10	9	6	9	10	13	15	0.666667	0.666667	0.666667	0.6	0.466667	0.6	0.866667	0.6	0.666667	0.6	0.4	0.6	0.666667	0.866667	1	0.00853387	0.00784614	0.00754019	0.00752711	0.00631718	0.00759515	0.0118516	0.00815541	0.0086365	0.00799014	0.00565431	0.00768444	0.00884071	0.0104869
85	Complement component C8 beta chain OS=Homo sapiens GN=C8B PE=1 SV=3	CO8B_HUMAN	67	8.17	Homo sapiens	9	8	10	7	4	5	5	4	5	29	24	26	27	29	27	0.134328	0.119403	0.149254	0.104478	0.0597015	0.0746269	0.0746269	0.0597015	0.0746269	0.432836	0.358209	0.38806	0.402985	0.432836	0.402985	0.00171951	0.00140528	0.0016881	0.00131069	0.000808168	0.00094467	0.00102051	0.000811484	0.000966773	0.00576403	0.00506356	0.00497003	0.00534401	0.00523741
86	Tropomyosin alpha-4 chain OS=Homo sapiens GN=TPM4 PE=1 SV=3	TPM4_HUMAN	29	4.36	Homo sapiens	16	16	18	19	17	16	16	14	18	0	0	0	0	0	0	0.551724	0.551724	0.62069	0.655172	0.586207	0.551724	0.551724	0.482759	0.62069	0	0	0	0	0	0	0.00706252	0.00649336	0.00702017	0.00821926	0.00793538	0.00698404	0.00754476	0.00656183	0.00804088	0	0	0	0	0
87	Apolipoprotein C-II OS=Homo sapiens GN=APOC2 PE=1 SV=1	APOC2_HUMAN	11	4.36	Homo sapiens	9	9	9	6	9	10	9	7	11	7	7	4	8	7	9	0.818182	0.818182	0.818182	0.545455	0.818182	0.909091	0.818182	0.636364	1	0.636364	0.636364	0.363636	0.727273	0.636364	0.818182	0.0104734	0.00962936	0.00925386	0.00684283	0.0110756	0.0115078	0.0111885	0.00864968	0.0129548	0.00847439	0.0089955	0.00465724	0.00964441	0.00770015
88	Serum amyloid A-4 protein OS=Homo sapiens GN=SAA4 PE=1 SV=2	SAA4_HUMAN	15	9.38	Homo sapiens	3	0	3	3	2	2	3	3	3	11	8	7	8	7	5	0.2	0	0.2	0.2	0.133333	0.133333	0.2	0.2	0.2	0.733333	0.533333	0.466667	0.533333	0.466667	0.333333	0.00256016	0	0.00226206	0.00250904	0.00180491	0.00168781	0.00273497	0.00271847	0.00259095	0.00976573	0.00753908	0.00597678	0.00707257	0.00564677
89	Spectrin alpha chain, erythrocytic 1 OS=Homo sapiens GN=SPTA1 PE=1 SV=5	SPTA1_HUMAN	280	4.69	Homo sapiens	3	3	4	0	4	5	0	5	4	0	0	0	0	0	0	0.0107143	0.0107143	0.0142857	0	0.0142857	0.0178571	0	0.0178571	0.0142857	0	0	0	0	0	0	0.000137152	0.000126099	0.000161575	0	0.000193383	0.000226046	0	0.000242721	0.000185068	0	0	0	0	0
90	14-3-3 protein zeta/delta OS=Homo sapiens GN=YWHAZ PE=1 SV=1	1433Z_HUMAN	28	4.43	Homo sapiens	15	22	19	17	15	15	16	14	20	0	0	0	0	0	0	0.535714	0.785714	0.678571	0.607143	0.535714	0.535714	0.571429	0.5	0.714286	0	0	0	0	0	0	0.00685758	0.00924724	0.00767483	0.00761672	0.00725187	0.00678138	0.00781421	0.00679618	0.0092534	0	0	0	0	0
91	Tubulin beta chain OS=Homo sapiens GN=TUBB PE=1 SV=2	TBB5_HUMAN	50	4.52	Homo sapiens	26	26	26	20	20	14	26	20	23	0	0	0	0	0	0	0.52	0.52	0.52	0.4	0.4	0.28	0.52	0.4	0.46	0	0	0	0	0	0	0.00665642	0.00611999	0.00588134	0.00501807	0.00541473	0.0035444	0.00711093	0.00543694	0.00595919	0	0	0	0	0
92	Complement component C6 OS=Homo sapiens GN=C6 PE=1 SV=3	CO6_HUMAN	105	6.74	Homo sapiens	6	4	4	4	3	5	3	4	2	26	26	30	32	22	25	0.0571429	0.0380952	0.0380952	0.0380952	0.0285714	0.047619	0.0285714	0.0380952	0.0190476	0.247619	0.247619	0.285714	0.304762	0.209524	0.238095	0.000731475	0.000448351	0.000430868	0.000477912	0.000386766	0.000602789	0.000390711	0.000517804	0.000246757	0.00329752	0.00350029	0.00365926	0.00404147	0.00253529
93	Tubulin alpha-1B chain OS=Homo sapiens GN=TUBA1B PE=1 SV=1	TBA1B_HUMAN	50	4.7	Homo sapiens	13	16	22	16	14	17	19	15	16	0	0	0	0	0	0	0.26	0.32	0.44	0.32	0.28	0.34	0.38	0.3	0.32	0	0	0	0	0	0	0.00332821	0.00376615	0.00497652	0.00401446	0.00379031	0.00430392	0.00519645	0.00407771	0.00414552	0	0	0	0	0
94	Vitamin K-dependent protein S OS=Homo sapiens GN=PROS1 PE=1 SV=1	PROS_HUMAN	75	5.37	Homo sapiens	10	11	12	8	10	9	6	6	8	14	10	9	16	15	19	0.133333	0.146667	0.16	0.106667	0.133333	0.12	0.08	0.08	0.106667	0.186667	0.133333	0.12	0.213333	0.2	0.253333	0.00170677	0.00172615	0.00180964	0.00133815	0.00180491	0.00151903	0.00109399	0.00108739	0.00138184	0.00248582	0.00188477	0.00153689	0.00282903	0.00242005
95	Glyceraldehyde-3-phosphate dehydrogenase OS=Homo sapiens GN=GAPDH PE=1 SV=3	G3P_HUMAN	36	8.73	Homo sapiens	13	15	14	18	10	10	14	15	13	3	2	2	3	3	3	0.361111	0.416667	0.388889	0.5	0.277778	0.277778	0.388889	0.416667	0.361111	0.0833333	0.0555556	0.0555556	0.0833333	0.0833333	0.0833333	0.00462252	0.00490384	0.00439844	0.00627259	0.00376023	0.00351627	0.00531801	0.00566348	0.00467811	0.00110974	0.000785321	0.000711522	0.00110509	0.00100835
96	Ficolin-3 OS=Homo sapiens GN=FCN3 PE=1 SV=2	FCN3_HUMAN	33	6.66	Homo sapiens	0	0	0	0	0	0	0	0	0	0	0	0	0	2	0	0	0	0	0	0	0	0	0	0	0	0	0	0	0.0606061	0	0	0	0	0	0	0	0	0	0	0	0	0	0	0.000733347
97	Ig lambda-2 chain C regions OS=Homo sapiens GN=IGLC2 PE=1 SV=1	LAC2_HUMAN	11	7.34	Homo sapiens	0	0	0	17	15	22	15	12	12	16	12	15	17	18	20	0	0	0	1.54545	1.36364	2	1.36364	1.09091	1.09091	1.45455	1.09091	1.36364	1.54545	1.63636	1.81818	0	0	0	0.019388	0.0184593	0.0253172	0.0186476	0.014828	0.0141325	0.01937	0.0154208	0.0174646	0.0204944	0.0198004
98	Latent-transforming growth factor beta-binding protein 1 OS=Homo sapiens GN=LTBP1 PE=1 SV=4	LTBP1_HUMAN	187	5.85	Homo sapiens	22	22	33	25	16	21	27	22	26	0	0	0	0	0	0	0.117647	0.117647	0.176471	0.13369	0.0855615	0.112299	0.144385	0.117647	0.139037	0	0	0	0	0	0	0.00150598	0.00138461	0.00199593	0.00167716	0.00115823	0.00142155	0.00197445	0.0015991	0.0018012	0	0	0	0	0
99	Alpha-1-antichymotrypsin OS=Homo sapiens GN=SERPINA3 PE=1 SV=2	AACT_HUMAN	48	5.19	Homo sapiens	6	6	7	5	3	3	4	3	5	11	12	10	15	17	16	0.125	0.125	0.145833	0.104167	0.0625	0.0625	0.0833333	0.0625	0.104167	0.229167	0.25	0.208333	0.3125	0.354167	0.333333	0.0016001	0.00147115	0.00164942	0.00130679	0.000846051	0.000791161	0.00113957	0.000849522	0.00134945	0.00305179	0.00353394	0.00266821	0.00414408	0.0042855
100	Apolipoprotein L1 OS=Homo sapiens GN=APOL1 PE=1 SV=5	APOL1_HUMAN	44	5.55	Homo sapiens	6	9	7	5	4	6	6	5	5	11	9	12	12	11	15	0.136364	0.204545	0.159091	0.113636	0.0909091	0.136364	0.136364	0.113636	0.113636	0.25	0.204545	0.272727	0.272727	0.25	0.340909	0.00174557	0.00240734	0.00179936	0.00142559	0.00123062	0.00172617	0.00186476	0.00154459	0.00147213	0.00332923	0.00289141	0.00349293	0.00361666	0.00302506
101	Pyruvate kinase PKM OS=Homo sapiens GN=PKM PE=1 SV=4	KPYM_HUMAN	58	7.94	Homo sapiens	12	12	15	14	15	14	5	9	10	0	0	0	0	0	0	0.206897	0.206897	0.258621	0.241379	0.258621	0.241379	0.0862069	0.155172	0.172414	0	0	0	0	0	0	0.00264844	0.00243501	0.00292507	0.00302815	0.0035009	0.00305552	0.00117887	0.00210916	0.00223358	0	0	0	0	0
102	Integrin-linked protein kinase OS=Homo sapiens GN=ILK PE=1 SV=2	ILK_HUMAN	51	8.18	Homo sapiens	8	11	11	12	14	11	9	10	8	0	0	0	0	0	0	0.156863	0.215686	0.215686	0.235294	0.27451	0.215686	0.176471	0.196078	0.156863	0	0	0	0	0	0	0.00200797	0.00253846	0.00243947	0.00295181	0.00371599	0.00273028	0.00241321	0.00266517	0.00203212	0	0	0	0	0
103	Spectrin beta chain, erythrocytic OS=Homo sapiens GN=SPTB PE=1 SV=5	SPTB1_HUMAN	246	4.92	Homo sapiens	7	5	5	4	3	4	5	5	4	0	0	0	0	0	0	0.0284553	0.0203252	0.0203252	0.0162602	0.0121951	0.0162602	0.0203252	0.0203252	0.0162602	0	0	0	0	0	0	0.000364251	0.000239212	0.000229884	0.000203987	0.000165083	0.000205831	0.000277945	0.000276267	0.000210646	0	0	0	0	0
104	Myosin light polypeptide 6 OS=Homo sapiens GN=MYL6 PE=1 SV=2	MYL6_HUMAN	17	4.29	Homo sapiens	14	14	16	20	18	20	12	12	16	0	0	0	0	0	0	0.823529	0.823529	0.941176	1.17647	1.05882	1.17647	0.705882	0.705882	0.941176	0	0	0	0	0	0	0.0105418	0.00969229	0.010645	0.014759	0.0143331	0.0148924	0.00965285	0.00959461	0.0121927	0	0	0	0	0
105	Coagulation factor XIII A chain OS=Homo sapiens GN=F13A1 PE=1 SV=4	F13A_HUMAN	83	5.95	Homo sapiens	10	14	13	12	14	10	10	11	9	6	8	11	7	10	12	0.120482	0.168675	0.156627	0.144578	0.168675	0.120482	0.120482	0.13253	0.108434	0.0722892	0.0963855	0.13253	0.0843373	0.120482	0.144578	0.00154227	0.00198517	0.00177149	0.00181376	0.00228332	0.00152513	0.00164757	0.0018014	0.00140473	0.000962668	0.00136248	0.00169737	0.0011184	0.00145786
106	Apolipoprotein C-I OS=Homo sapiens GN=APOC1 PE=1 SV=1	APOC1_HUMAN	9	9.17	Homo sapiens	2	5	5	0	2	2	0	0	0	7	6	7	5	7	7	0.222222	0.555556	0.555556	0	0.222222	0.222222	0	0	0	0.777778	0.666667	0.777778	0.555556	0.777778	0.777778	0.00284462	0.00653845	0.00628349	0	0.00300818	0.00281302	0	0	0	0.0103576	0.00942385	0.00996131	0.00736726	0.00941129
107	Keratin, type II cytoskeletal 5 OS=Homo sapiens GN=KRT5 PE=1 SV=3	K2C5_HUMAN	62	7.91	Homo sapiens	15	11	12	10	11	10	13	8	10	27	28	28	29	15	17	0.241935	0.177419	0.193548	0.16129	0.177419	0.16129	0.209677	0.129032	0.16129	0.435484	0.451613	0.451613	0.467742	0.241935	0.274194	0.00309697	0.00208809	0.00218909	0.00202342	0.00240169	0.00204171	0.00286731	0.00175385	0.00208948	0.0057993	0.0063839	0.00578399	0.00620276	0.00292747
108	Keratin, type I cytoskeletal 14 OS=Homo sapiens GN=KRT14 PE=1 SV=4	K1C14_HUMAN	52	4.81	Homo sapiens	15	11	14	12	10	11	12	13	10	31	27	29	28	20	22	0.288462	0.211538	0.269231	0.230769	0.192308	0.211538	0.230769	0.25	0.192308	0.596154	0.519231	0.557692	0.538462	0.384615	0.423077	0.00369254	0.00248964	0.00304507	0.00289504	0.00260323	0.00267778	0.00315574	0.00339809	0.0024913	0.00793892	0.00733973	0.00714259	0.00714058	0.00465393
109	Protein AMBP OS=Homo sapiens GN=AMBP PE=1 SV=1	AMBP_HUMAN	39	6.15	Homo sapiens	7	11	9	9	8	10	8	7	9	10	14	17	13	14	20	0.179487	0.282051	0.230769	0.230769	0.205128	0.25641	0.205128	0.179487	0.230769	0.25641	0.358974	0.435897	0.333333	0.358974	0.512821	0.00229758	0.00331952	0.00261006	0.00289504	0.00277678	0.00324579	0.0028051	0.00243965	0.00298956	0.00341459	0.00507438	0.00558271	0.00442036	0.00434367
110	Plasma protease C1 inhibitor OS=Homo sapiens GN=SERPING1 PE=1 SV=2	IC1_HUMAN	55	6.52	Homo sapiens	0	2	2	0	2	0	2	0	0	11	11	15	15	21	26	0	0.0363636	0.0363636	0	0.0363636	0	0.0363636	0	0	0.2	0.2	0.272727	0.272727	0.381818	0.472727	0	0.000427971	0.000411283	0	0.000492248	0	0.000497268	0	0	0.00266338	0.00282716	0.00349293	0.00361666	0.00462009
111	Alpha-1-acid glycoprotein 1 OS=Homo sapiens GN=ORM1 PE=1 SV=1	A1AG1_HUMAN	24	4.66	Homo sapiens	5	4	5	5	4	4	0	5	3	7	10	8	13	13	14	0.208333	0.166667	0.208333	0.208333	0.166667	0.166667	0	0.208333	0.125	0.291667	0.416667	0.333333	0.541667	0.541667	0.583333	0.00266684	0.00196154	0.00235631	0.00261358	0.00225614	0.00210976	0	0.00283174	0.00161934	0.0038841	0.00588991	0.00426913	0.00718308	0.00655429
112	Pleckstrin OS=Homo sapiens GN=PLEK PE=1 SV=3	PLEK_HUMAN	40	8.45	Homo sapiens	10	13	14	10	8	14	9	10	10	0	0	0	0	0	0	0.25	0.325	0.35	0.25	0.2	0.35	0.225	0.25	0.25	0	0	0	0	0	0	0.0032002	0.00382499	0.0039586	0.0031363	0.00270736	0.0044305	0.00307685	0.00339809	0.00323869	0	0	0	0	0
113	Ankyrin-1 OS=Homo sapiens GN=ANK1 PE=1 SV=3	ANK1_HUMAN	206	5.92	Homo sapiens	3	2	5	2	0	4	5	2	4	0	0	0	0	0	0	0.0145631	0.00970874	0.0242718	0.00970874	0	0.0194175	0.0242718	0.00970874	0.0194175	0	0	0	0	0	0	0.00018642	0.000114264	0.000274521	0.000121798	0	0.000245798	0.000331914	0.000131965	0.000251549	0	0	0	0	0
114	Antithrombin-III OS=Homo sapiens GN=SERPINC1 PE=1 SV=1	ANT3_HUMAN	53	6.68	Homo sapiens	6	6	8	5	3	5	4	5	4	12	11	13	17	16	22	0.113208	0.113208	0.150943	0.0943396	0.0566038	0.0943396	0.0754717	0.0943396	0.0754717	0.226415	0.207547	0.245283	0.320755	0.301887	0.415094	0.00144915	0.00133236	0.00170721	0.00118351	0.000766235	0.00119421	0.00103207	0.0012823	0.000977717	0.00301515	0.00293384	0.00314144	0.00425355	0.0036529
115	Complement component C8 alpha chain OS=Homo sapiens GN=C8A PE=1 SV=2	CO8A_HUMAN	65	6.41	Homo sapiens	2	3	2	2	3	0	0	2	2	16	17	17	19	14	15	0.0307692	0.0461538	0.0307692	0.0307692	0.0461538	0	0	0.0307692	0.0307692	0.246154	0.261538	0.261538	0.292308	0.215385	0.230769	0.000393871	0.000543194	0.000348009	0.000386006	0.000624776	0	0	0.000418226	0.000398608	0.00327801	0.00369705	0.00334963	0.00387631	0.0026062
116	Complement component C7 OS=Homo sapiens GN=C7 PE=1 SV=2	CO7_HUMAN	94	6.44	Homo sapiens	5	6	5	4	0	0	0	0	2	24	27	24	25	20	22	0.0531915	0.0638298	0.0531915	0.0425532	0	0	0	0	0.0212766	0.255319	0.287234	0.255319	0.265957	0.212766	0.234043	0.000680894	0.000751226	0.000601611	0.000533838	0	0	0	0	0.000275633	0.00340006	0.00406028	0.00326997	0.00352688	0.00257452
117	HLA class I histocompatibility antigen, A-2 alpha chain OS=Homo sapiens GN=HLA-A PE=1 SV=1	1A02_HUMAN	41	7	Homo sapiens	10	11	9	13	9	12	9	10	11	0	0	0	0	0	0	0.243902	0.268293	0.219512	0.317073	0.219512	0.292683	0.219512	0.243902	0.268293	0	0	0	0	0	0	0.00312215	0.00315759	0.00248274	0.00397774	0.0029715	0.00370495	0.0030018	0.00331521	0.00347567	0	0	0	0	0
118	Alpha-1B-glycoprotein OS=Homo sapiens GN=A1BG PE=1 SV=4	A1BG_HUMAN	54	5.71	Homo sapiens	5	5	6	2	5	4	3	0	0	9	10	11	12	13	15	0.0925926	0.0925926	0.111111	0.037037	0.0925926	0.0740741	0.0555556	0	0	0.166667	0.185185	0.203704	0.222222	0.240741	0.277778	0.00118526	0.00108974	0.0012567	0.000464636	0.00125341	0.000937672	0.000759715	0	0	0.00221948	0.00261774	0.00260891	0.0029469	0.00291302
119	Plasma kallikrein OS=Homo sapiens GN=KLKB1 PE=1 SV=1	KLKB1_HUMAN	71	8.26	Homo sapiens	6	8	8	13	6	11	10	11	11	10	9	8	11	12	13	0.084507	0.112676	0.112676	0.183099	0.084507	0.15493	0.140845	0.15493	0.15493	0.140845	0.126761	0.112676	0.15493	0.169014	0.183099	0.00108176	0.00132611	0.0012744	0.00229701	0.00114396	0.00196119	0.00192604	0.00210586	0.00200707	0.00187562	0.00179186	0.00144309	0.00205453	0.00204511
120	Integrin beta-1 OS=Homo sapiens GN=ITGB1 PE=1 SV=2	ITB1_HUMAN	88	5.04	Homo sapiens	11	10	11	11	12	11	10	9	11	0	0	0	0	0	0	0.125	0.113636	0.125	0.125	0.136364	0.125	0.113636	0.102273	0.125	0	0	0	0	0	0	0.0016001	0.00133741	0.00141378	0.00156815	0.00184593	0.00158232	0.00155396	0.00139013	0.00161934	0	0	0	0	0
121	Lactotransferrin OS=Homo sapiens GN=LTF PE=1 SV=6	TRFL_HUMAN	78	8.17	Homo sapiens	0	0	0	0	0	0	0	0	0	0	0	0	0	0	0	0	0	0	0	0	0	0	0	0	0	0	0	0	0	0	0	0	0	0	0	0	0	0	0	0	0	0	0	0
122	Serum amyloid A-2 protein OS=Homo sapiens GN=SAA2 PE=1 SV=1	SAA2_HUMAN	14	9.48	Homo sapiens	0	0	0	0	0	0	0	0	0	2	3	3	0	3	3	0	0	0	0	0	0	0	0	0	0.142857	0.214286	0.214286	0	0.214286	0.214286	0	0	0	0	0	0	0	0	0	0.00190241	0.0030291	0.00274444	0	0.00259291
123	Haptoglobin-related protein OS=Homo sapiens GN=HPR PE=2 SV=2	HPTR_HUMAN	39	7.11	Homo sapiens	12	15	15	11	12	12	13	10	11	34	29	31	34	42	42	0.307692	0.384615	0.384615	0.282051	0.307692	0.307692	0.333333	0.25641	0.282051	0.871795	0.74359	0.794872	0.871795	1.07692	1.07692	0.00393871	0.00452662	0.00435011	0.00353838	0.00416517	0.00389495	0.00455829	0.00348522	0.0036539	0.0116096	0.0105112	0.0101802	0.0115609	0.013031
124	Sarcoplasmic/endoplasmic reticulum calcium ATPase 3 OS=Homo sapiens GN=ATP2A3 PE=1 SV=2	AT2A3_HUMAN	114	5.26	Homo sapiens	13	13	16	13	10	12	13	10	15	0	0	0	0	0	0	0.114035	0.114035	0.140351	0.114035	0.0877193	0.105263	0.114035	0.0877193	0.131579	0	0	0	0	0	0	0.00145974	0.0013421	0.00158741	0.00143059	0.00118744	0.00133248	0.00155942	0.00119231	0.00170457	0	0	0	0	0
125	Heat shock cognate 71 kDa protein OS=Homo sapiens GN=HSPA8 PE=1 SV=1	HSP7C_HUMAN	71	5.16	Homo sapiens	10	10	13	14	12	12	15	13	16	0	0	0	0	0	0	0.140845	0.140845	0.183099	0.197183	0.169014	0.169014	0.211268	0.183099	0.225352	0	0	0	0	0	0	0.00180293	0.00165764	0.0020709	0.0024737	0.00228791	0.00213948	0.00288906	0.00248874	0.00291938	0	0	0	0	0
126	ATP synthase subunit beta, mitochondrial OS=Homo sapiens GN=ATP5B PE=1 SV=3	ATPB_HUMAN	57	5.07	Homo sapiens	12	12	13	13	11	10	13	11	13	3	3	3	3	2	2	0.210526	0.210526	0.22807	0.22807	0.192982	0.175439	0.22807	0.192982	0.22807	0.0526316	0.0526316	0.0526316	0.0526316	0.0350877	0.0350877	0.00269491	0.00247773	0.00257954	0.00286118	0.00261237	0.0022208	0.00311883	0.00262309	0.00295459	0.00070089	0.000743988	0.000674073	0.000697951	0.000424569
127	Fibulin-1 OS=Homo sapiens GN=FBLN1 PE=1 SV=4	FBLN1_HUMAN	77	4.86	Homo sapiens	7	9	11	11	7	8	6	5	2	12	8	15	14	13	13	0.0909091	0.116883	0.142857	0.142857	0.0909091	0.103896	0.0779221	0.0649351	0.025974	0.155844	0.103896	0.194805	0.181818	0.168831	0.168831	0.00116371	0.00137562	0.00161575	0.00179217	0.00123062	0.00131518	0.00106557	0.000882621	0.000336487	0.00207536	0.00146865	0.00249495	0.0024111	0.0020429
128	Coagulation factor XI OS=Homo sapiens GN=F11 PE=1 SV=1	FA11_HUMAN	70	8.14	Homo sapiens	5	12	12	13	12	11	12	7	9	0	0	0	0	0	0	0.0714286	0.171429	0.171429	0.185714	0.171429	0.157143	0.171429	0.1	0.128571	0	0	0	0	0	0	0.000914344	0.00201758	0.0019389	0.00232982	0.0023206	0.00198921	0.00234426	0.00135924	0.00166561	0	0	0	0	0
129	Isocitrate dehydrogenase [NADP], mitochondrial OS=Homo sapiens GN=IDH2 PE=1 SV=2	IDHP_HUMAN	51	8.95	Homo sapiens	12	15	13	8	9	11	11	10	11	0	0	0	0	0	0	0.235294	0.294118	0.254902	0.156863	0.176471	0.215686	0.215686	0.196078	0.215686	0	0	0	0	0	0	0.00301196	0.00346153	0.00288301	0.00196787	0.00238885	0.00273028	0.00294948	0.00266517	0.00279416	0	0	0	0	0
130	Ras-related protein Rap-1b OS=Homo sapiens GN=RAP1B PE=1 SV=1	RAP1B_HUMAN	21	5.39	Homo sapiens	11	11	14	12	10	8	7	8	11	0	0	0	0	0	0	0.52381	0.52381	0.666667	0.571429	0.47619	0.380952	0.333333	0.380952	0.52381	0	0	0	0	0	0	0.00670519	0.00616483	0.00754019	0.00716868	0.0064461	0.00482232	0.00455829	0.00517804	0.00678582	0	0	0	0	0
131	60 kDa heat shock protein, mitochondrial OS=Homo sapiens GN=HSPD1 PE=1 SV=2	CH60_HUMAN	61	5.55	Homo sapiens	15	11	13	14	16	14	14	10	12	0	0	0	0	0	0	0.245902	0.180328	0.213115	0.229508	0.262295	0.229508	0.229508	0.163934	0.196721	0	0	0	0	0	0	0.00314774	0.00212232	0.00241039	0.00287922	0.00355064	0.00290525	0.0031385	0.00222826	0.00254848	0	0	0	0	0
132	Platelet basic protein OS=Homo sapiens GN=PPBP PE=1 SV=3	CXCL7_HUMAN	14	9.07	Homo sapiens	7	9	7	12	8	9	8	8	7	0	0	0	0	0	0	0.5	0.642857	0.5	0.857143	0.571429	0.642857	0.571429	0.571429	0.5	0	0	0	0	0	0	0.00640041	0.00756592	0.00565514	0.010753	0.00773532	0.00813766	0.00781421	0.00776706	0.00647738	0	0	0	0	0
133	Immunoglobulin J chain OS=Homo sapiens GN=IGJ PE=1 SV=4	IGJ_HUMAN	18	4.87	Homo sapiens	6	4	6	3	3	3	5	6	4	5	6	4	6	3	5	0.333333	0.222222	0.333333	0.166667	0.166667	0.166667	0.277778	0.333333	0.222222	0.277778	0.333333	0.222222	0.333333	0.166667	0.277778	0.00426694	0.00261538	0.00377009	0.00209086	0.00225614	0.00210976	0.00379858	0.00453079	0.00287883	0.00369914	0.00471193	0.00284609	0.00442036	0.0020167
134	Fructose-bisphosphate aldolase A OS=Homo sapiens GN=ALDOA PE=1 SV=2	ALDOA_HUMAN	39	8.2	Homo sapiens	10	7	8	6	9	10	8	11	9	0	0	0	0	0	0	0.25641	0.179487	0.205128	0.153846	0.230769	0.25641	0.205128	0.282051	0.230769	0	0	0	0	0	0	0.00328226	0.00211242	0.00232006	0.00193003	0.00312388	0.00324579	0.0028051	0.00383374	0.00298956	0	0	0	0	0
135	78 kDa glucose-regulated protein OS=Homo sapiens GN=HSPA5 PE=1 SV=2	GRP78_HUMAN	72	4.8	Homo sapiens	10	9	12	8	11	5	7	11	10	0	0	0	0	0	0	0.138889	0.125	0.166667	0.111111	0.152778	0.0694444	0.0972222	0.152778	0.138889	0	0	0	0	0	0	0.00177789	0.00147115	0.00188505	0.00139391	0.00206812	0.000879068	0.0013295	0.00207661	0.00179927	0	0	0	0	0
136	Ig kappa chain V-III region HAH OS=Homo sapiens PE=2 SV=1	KV312_HUMAN (+1)	14	8.18	Homo sapiens	4	5	5	4	7	4	6	4	5	4	6	5	3	5	5	0.285714	0.357143	0.357143	0.285714	0.5	0.285714	0.428571	0.285714	0.357143	0.285714	0.428571	0.357143	0.214286	0.357143	0.357143	0.00365737	0.00420329	0.00403938	0.00358434	0.00676841	0.00361674	0.00586066	0.00388353	0.0046267	0.00380483	0.00605819	0.00457407	0.00284166	0.00432151
137	Cofilin-1 OS=Homo sapiens GN=CFL1 PE=1 SV=3	COF1_HUMAN	19	8.29	Homo sapiens	9	8	8	8	5	6	6	4	10	0	0	0	0	0	0	0.473684	0.421053	0.421053	0.421053	0.263158	0.315789	0.315789	0.210526	0.526316	0	0	0	0	0	0	0.00606354	0.00495546	0.00476222	0.00528218	0.00356232	0.00399745	0.00431838	0.00286155	0.00681829	0	0	0	0	0
138	Pigment epithelium-derived factor OS=Homo sapiens GN=SERPINF1 PE=1 SV=4	PEDF_HUMAN	46	6.33	Homo sapiens	4	4	4	0	3	3	3	3	3	4	3	3	3	6	5	0.0869565	0.0869565	0.0869565	0	0.0652174	0.0652174	0.0652174	0.0652174	0.0652174	0.0869565	0.0652174	0.0652174	0.0652174	0.130435	0.108696	0.00111311	0.00102341	0.000983502	0	0.000882836	0.000825559	0.000891839	0.000886458	0.000844875	0.00115799	0.000921899	0.000835265	0.000864852	0.00157829
139	Platelet endothelial cell adhesion molecule OS=Homo sapiens GN=PECAM1 PE=1 SV=1	PECA1_HUMAN	83	6.99	Homo sapiens	8	8	9	9	10	8	6	9	11	0	0	0	0	0	0	0.0963855	0.0963855	0.108434	0.108434	0.120482	0.0963855	0.0722892	0.108434	0.13253	0	0	0	0	0	0	0.00123381	0.00113438	0.00122642	0.00136032	0.00163094	0.0012201	0.000988545	0.00147387	0.0017169	0	0	0	0	0
140	Hyaluronan-binding protein 2 OS=Homo sapiens GN=HABP2 PE=1 SV=1	HABP2_HUMAN	63	6.52	Homo sapiens	3	3	4	3	4	5	2	2	4	2	2	0	2	4	3	0.047619	0.047619	0.0634921	0.047619	0.0634921	0.0793651	0.031746	0.031746	0.0634921	0.031746	0.031746	0	0.031746	0.0634921	0.047619	0.000609562	0.000560439	0.000718113	0.00059739	0.00085948	0.00100465	0.000434123	0.000431503	0.000822524	0.000422759	0.000448755	0	0.000420986	0.000768268
141	ATP synthase subunit alpha, mitochondrial OS=Homo sapiens GN=ATP5A1 PE=1 SV=1	ATPA_HUMAN	60	9.56	Homo sapiens	14	10	10	7	9	9	8	11	9	2	3	2	2	0	2	0.233333	0.166667	0.166667	0.116667	0.15	0.15	0.133333	0.183333	0.15	0.0333333	0.05	0.0333333	0.0333333	0	0.0333333	0.00298686	0.00196154	0.00188505	0.0014636	0.00203052	0.00189879	0.00182332	0.00249193	0.00194321	0.000443897	0.000706789	0.000426913	0.000442036	0
142	Clathrin heavy chain 1 OS=Homo sapiens GN=CLTC PE=1 SV=5	CLH1_HUMAN	192	5.42	Homo sapiens	11	12	13	8	7	13	6	5	7	0	0	0	0	0	0	0.0572917	0.0625	0.0677083	0.0416667	0.0364583	0.0677083	0.03125	0.0260417	0.0364583	0	0	0	0	0	0	0.00073338	0.000735576	0.0007658	0.000522716	0.00049353	0.000857091	0.00042734	0.000353968	0.000472309	0	0	0	0	0
143	Ig heavy chain V-III region 23 OS=Homo sapiens GN=IGHV3-23 PE=1 SV=2	HV303_HUMAN	13	8.46	Homo sapiens	3	4	3	4	5	5	3	3	2	3	2	4	9	5	5	0.230769	0.307692	0.230769	0.307692	0.384615	0.384615	0.230769	0.230769	0.153846	0.230769	0.153846	0.307692	0.692308	0.384615	0.384615	0.00295403	0.0036213	0.00261006	0.00386006	0.00520647	0.00486868	0.00315574	0.0031367	0.00199304	0.00307313	0.00217474	0.00394074	0.00918074	0.00465393
144	WD repeat-containing protein 1 OS=Homo sapiens GN=WDR1 PE=1 SV=4	WDR1_HUMAN	66	6.64	Homo sapiens	3	7	3	4	5	4	4	4	6	0	0	0	0	0	0	0.0454545	0.106061	0.0454545	0.0606061	0.0757576	0.0606061	0.0606061	0.0606061	0.0909091	0	0	0	0	0	0	0.000581855	0.00124825	0.000514104	0.000760314	0.00102552	0.000767187	0.00082878	0.000823779	0.0011777	0	0	0	0	0
145	Apolipoprotein M OS=Homo sapiens GN=APOM PE=1 SV=2	APOM_HUMAN	21	5.92	Homo sapiens	0	0	0	0	0	0	0	0	0	3	4	7	6	4	4	0	0	0	0	0	0	0	0	0	0.142857	0.190476	0.333333	0.285714	0.190476	0.190476	0	0	0	0	0	0	0	0	0	0.00190241	0.00269253	0.00426913	0.00378888	0.00230481
146	Platelet glycoprotein 4 OS=Homo sapiens GN=CD36 PE=1 SV=2	CD36_HUMAN	53	8.06	Homo sapiens	8	8	9	6	4	7	3	6	7	0	0	0	0	0	0	0.150943	0.150943	0.169811	0.113208	0.0754717	0.132075	0.0566038	0.113208	0.132075	0	0	0	0	0	0	0.0019322	0.00177648	0.00192061	0.00142021	0.00102165	0.00167189	0.000774049	0.00153876	0.00171101	0	0	0	0	0
147	Proteoglycan 4 OS=Homo sapiens GN=PRG4 PE=1 SV=2	PRG4_HUMAN	151	10.16	Homo sapiens	7	6	11	7	9	5	7	6	5	6	7	6	10	8	8	0.0463576	0.0397351	0.0728477	0.0463576	0.0596026	0.0331126	0.0463576	0.0397351	0.0331126	0.0397351	0.0463576	0.0397351	0.0662252	0.0529801	0.0529801	0.000593415	0.000467651	0.000823928	0.000581565	0.00080683	0.000419158	0.000633934	0.000540094	0.000428965	0.000529148	0.000655301	0.000508903	0.000878217	0.000641072
148	Guanine nucleotide-binding protein G(i) subunit alpha-2 OS=Homo sapiens GN=GNAI2 PE=1 SV=3	GNAI2_HUMAN	40	5.2	Homo sapiens	5	7	5	5	4	4	3	3	4	0	0	0	0	0	0	0.125	0.175	0.125	0.125	0.1	0.1	0.075	0.075	0.1	0	0	0	0	0	0	0.0016001	0.00205961	0.00141378	0.00156815	0.00135368	0.00126586	0.00102562	0.00101943	0.00129548	0	0	0	0	0
149	Histone H4 OS=Homo sapiens GN=HIST1H4A PE=1 SV=2	H4_HUMAN	11	11.91	Homo sapiens	2	2	4	2	2	2	0	2	3	0	0	0	0	0	0	0.181818	0.181818	0.363636	0.181818	0.181818	0.181818	0	0.181818	0.272727	0	0	0	0	0	0	0.00232742	0.00213986	0.00411283	0.00228094	0.00246124	0.00230156	0	0.00247134	0.00353311	0	0	0	0	0
150	Profilin-1 OS=Homo sapiens GN=PFN1 PE=1 SV=2	PROF1_HUMAN	15	8.46	Homo sapiens	8	10	9	8	7	8	4	4	5	0	0	0	0	0	0	0.533333	0.666667	0.6	0.533333	0.466667	0.533333	0.266667	0.266667	0.333333	0	0	0	0	0	0	0.0068271	0.00784614	0.00678617	0.00669076	0.00631718	0.00675124	0.00364663	0.00362463	0.00431825	0	0	0	0	0
151	Protein disulfide-isomerase A3 OS=Homo sapiens GN=PDIA3 PE=1 SV=4	PDIA3_HUMAN	57	6.28	Homo sapiens	5	11	4	6	6	5	2	3	8	0	0	0	0	0	0	0.0877193	0.192982	0.0701754	0.105263	0.105263	0.0877193	0.0350877	0.0526316	0.140351	0	0	0	0	0	0	0.00112288	0.00227125	0.000793704	0.00132055	0.00142493	0.0011104	0.00047982	0.000715387	0.00181821	0	0	0	0	0
152	Protein Z-dependent protease inhibitor OS=Homo sapiens GN=SERPINA10 PE=1 SV=1	ZPI_HUMAN	51	8.58	Homo sapiens	5	5	3	6	6	6	4	6	5	5	3	5	5	5	3	0.0980392	0.0980392	0.0588235	0.117647	0.117647	0.117647	0.0784314	0.117647	0.0980392	0.0980392	0.0588235	0.0980392	0.0980392	0.0980392	0.0588235	0.00125498	0.00115384	0.00066531	0.0014759	0.00159257	0.00148924	0.00107254	0.0015991	0.00127007	0.00130558	0.000831516	0.00125563	0.0013001	0.0011863
153	Alpha-2-antiplasmin OS=Homo sapiens GN=SERPINF2 PE=1 SV=3	A2AP_HUMAN	55	6.24	Homo sapiens	2	2	0	0	0	0	2	2	0	13	9	13	14	15	14	0.0363636	0.0363636	0	0	0	0	0.0363636	0.0363636	0	0.236364	0.163636	0.236364	0.254545	0.272727	0.254545	0.000465484	0.000427971	0	0	0	0	0.000497268	0.000494268	0	0.00314763	0.00231313	0.0030272	0.00337555	0.00330006
154	Adenylyl cyclase-associated protein 1 OS=Homo sapiens GN=CAP1 PE=1 SV=5	CAP1_HUMAN	52	8.2	Homo sapiens	9	10	9	8	11	8	8	7	8	0	0	0	0	0	0	0.173077	0.192308	0.173077	0.153846	0.211538	0.153846	0.153846	0.134615	0.153846	0	0	0	0	0	0	0.00221553	0.00226331	0.00195755	0.00193003	0.00286356	0.00194747	0.00210383	0.00182974	0.00199304	0	0	0	0	0
155	Platelet glycoprotein IX OS=Homo sapiens GN=GP9 PE=1 SV=3	GPIX_HUMAN	19	6.32	Homo sapiens	7	7	7	7	7	7	7	5	5	0	0	0	0	0	0	0.368421	0.368421	0.368421	0.368421	0.368421	0.368421	0.368421	0.263158	0.263158	0	0	0	0	0	0	0.00471609	0.00433603	0.00416694	0.00462191	0.00498725	0.00466369	0.00503811	0.00357694	0.00340915	0	0	0	0	0
156	Moesin OS=Homo sapiens GN=MSN PE=1 SV=3	MOES_HUMAN	68	6.32	Homo sapiens	9	13	12	5	7	7	7	6	8	0	0	0	0	0	0	0.132353	0.191176	0.176471	0.0735294	0.102941	0.102941	0.102941	0.0882353	0.117647	0	0	0	0	0	0	0.00169423	0.00225	0.00199593	0.00092244	0.0013935	0.00130309	0.00140771	0.00119933	0.00152409	0	0	0	0	0
157	Zyxin OS=Homo sapiens GN=ZYX PE=1 SV=1	ZYX_HUMAN	61	6.65	Homo sapiens	11	9	11	7	10	9	9	10	8	0	0	0	0	0	0	0.180328	0.147541	0.180328	0.114754	0.163934	0.147541	0.147541	0.163934	0.131148	0	0	0	0	0	0	0.00230834	0.00173644	0.00203956	0.00143961	0.00221915	0.00186766	0.0020176	0.00222826	0.00169898	0	0	0	0	0
158	LIM and senescent cell antigen-like-containing domain protein 1 OS=Homo sapiens GN=LIMS1 PE=1 SV=4	LIMS1_HUMAN	37	8.08	Homo sapiens	8	9	6	4	6	6	6	5	7	0	0	0	0	0	0	0.216216	0.243243	0.162162	0.108108	0.162162	0.162162	0.162162	0.135135	0.189189	0	0	0	0	0	0	0.00276774	0.00286278	0.0018341	0.00135624	0.00219516	0.00205274	0.00221755	0.00183681	0.0024509	0	0	0	0	0
159	Protein S100-A9 OS=Homo sapiens GN=S100A9 PE=1 SV=1	S10A9_HUMAN	13	6.07	Homo sapiens	0	2	2	3	4	3	0	0	0	4	7	3	4	0	0	0	0.153846	0.153846	0.230769	0.307692	0.230769	0	0	0	0.307692	0.538462	0.230769	0.307692	0	0	0	0.00181065	0.00174004	0.00289504	0.00416517	0.00292121	0	0	0	0.00409751	0.00761157	0.00295555	0.00408033	0
160	Keratin, type II cytoskeletal 4 OS=Homo sapiens GN=KRT4 PE=1 SV=4	K2C4_HUMAN	57	6.55	Homo sapiens	0	0	0	0	0	0	5	5	4	30	29	27	29	9	11	0	0	0	0	0	0	0.0877193	0.0877193	0.0701754	0.526316	0.508772	0.473684	0.508772	0.157895	0.192982	0	0	0	0	0	0	0.00119955	0.00119231	0.000909106	0.0070089	0.00719189	0.00606666	0.00674686	0.00191056
161	Coronin-1C OS=Homo sapiens GN=CORO1C PE=1 SV=1	COR1C_HUMAN	53	7.09	Homo sapiens	9	8	9	8	9	10	5	6	9	0	0	0	0	0	0	0.169811	0.150943	0.169811	0.150943	0.169811	0.188679	0.0943396	0.113208	0.169811	0	0	0	0	0	0	0.00217372	0.00177648	0.00192061	0.00189361	0.0022987	0.00238841	0.00129008	0.00153876	0.00219986	0	0	0	0	0
162	Keratin, type I cytoskeletal 13 OS=Homo sapiens GN=KRT13 PE=1 SV=4	K1C13_HUMAN	50	4.61	Homo sapiens	0	0	0	0	0	0	0	0	0	29	24	24	28	14	20	0	0	0	0	0	0	0	0	0	0.58	0.48	0.48	0.56	0.28	0.4	0	0	0	0	0	0	0	0	0	0.0077238	0.00678517	0.00614755	0.0074262	0.00338806
163	Complement component C8 gamma chain OS=Homo sapiens GN=C8G PE=1 SV=3	CO8G_HUMAN	22	8.48	Homo sapiens	3	2	2	2	3	2	2	3	4	5	6	6	3	6	9	0.136364	0.0909091	0.0909091	0.0909091	0.136364	0.0909091	0.0909091	0.136364	0.181818	0.227273	0.272727	0.272727	0.136364	0.272727	0.409091	0.00174557	0.00106993	0.00102821	0.00114047	0.00184593	0.00115078	0.00124317	0.0018535	0.00235541	0.00302657	0.00385521	0.00349293	0.00180833	0.00330006
164	Coagulation factor XII OS=Homo sapiens GN=F12 PE=1 SV=3	FA12_HUMAN	68	7.76	Homo sapiens	3	6	3	5	5	5	3	2	4	0	2	2	2	5	7	0.0441176	0.0882353	0.0441176	0.0735294	0.0735294	0.0735294	0.0441176	0.0294118	0.0588235	0	0.0294118	0.0294118	0.0294118	0.0735294	0.102941	0.000564742	0.00103846	0.000498983	0.00092244	0.000995354	0.000930778	0.000603303	0.000399775	0.000762044	0	0.000415758	0.000376688	0.000390031	0.000889723
165	Transthyretin OS=Homo sapiens GN=TTR PE=1 SV=1	TTHY_HUMAN	16	5.58	Homo sapiens	4	5	4	2	2	2	3	3	3	6	4	7	6	8	8	0.25	0.3125	0.25	0.125	0.125	0.125	0.1875	0.1875	0.1875	0.375	0.25	0.4375	0.375	0.5	0.5	0.0032002	0.00367788	0.00282757	0.00156815	0.0016921	0.00158232	0.00256404	0.00254857	0.00242902	0.00499384	0.00353394	0.00560324	0.0049729	0.00605011
166	Integrin alpha-6 OS=Homo sapiens GN=ITGA6 PE=1 SV=5	ITA6_HUMAN	127	6.57	Homo sapiens	7	6	4	5	7	7	4	7	6	0	0	0	0	0	0	0.0551181	0.0472441	0.0314961	0.0393701	0.0551181	0.0551181	0.0314961	0.0551181	0.0472441	0	0	0	0	0	0	0.000705557	0.000556026	0.000356229	0.000493905	0.000746124	0.000697717	0.000430705	0.000749185	0.000612036	0	0	0	0	0
167	Vasodilator-stimulated phosphoprotein OS=Homo sapiens GN=VASP PE=1 SV=3	VASP_HUMAN	40	9.41	Homo sapiens	3	5	5	10	6	10	6	7	5	0	0	0	0	0	0	0.075	0.125	0.125	0.25	0.15	0.25	0.15	0.175	0.125	0	0	0	0	0	0	0.000960061	0.00147115	0.00141378	0.0031363	0.00203052	0.00316464	0.00205123	0.00237866	0.00161934	0	0	0	0	0
168	Desmoplakin OS=Homo sapiens GN=DSP PE=1 SV=3	DESP_HUMAN	332	6.78	Homo sapiens	0	0	0	0	0	0	0	0	0	4	8	5	5	0	0	0	0	0	0	0	0	0	0	0	0.0120482	0.0240964	0.0150602	0.0150602	0	0	0	0	0	0	0	0	0	0	0	0.000160445	0.000340621	0.000192882	0.000199715	0
169	Solute carrier family 2, facilitated glucose transporter member 3 OS=Homo sapiens GN=SLC2A3 PE=2 SV=1	GTR3_HUMAN	54	7.24	Homo sapiens	5	6	6	6	5	6	2	5	5	0	0	0	0	0	0	0.0925926	0.111111	0.111111	0.111111	0.0925926	0.111111	0.037037	0.0925926	0.0925926	0	0	0	0	0	0	0.00118526	0.00130769	0.0012567	0.00139391	0.00125341	0.00140651	0.000506477	0.00125855	0.00119951	0	0	0	0	0
170	Peptidyl-prolyl cis-trans isomerase A OS=Homo sapiens GN=PPIA PE=1 SV=2	PPIA_HUMAN	18	7.97	Homo sapiens	7	5	4	7	5	6	7	3	10	0	0	0	0	0	0	0.388889	0.277778	0.222222	0.388889	0.277778	0.333333	0.388889	0.166667	0.555556	0	0	0	0	0	0	0.00497809	0.00326923	0.0025134	0.00487868	0.00376023	0.00421953	0.00531801	0.00226539	0.00719709	0	0	0	0	0
171	Serum deprivation-response protein OS=Homo sapiens GN=SDPR PE=1 SV=3	SDPR_HUMAN	47	4.88	Homo sapiens	5	7	6	4	4	5	5	4	5	0	0	0	0	0	0	0.106383	0.148936	0.12766	0.0851064	0.0851064	0.106383	0.106383	0.0851064	0.106383	0	0	0	0	0	0	0.00136179	0.00175286	0.00144387	0.00106768	0.00115207	0.00134666	0.00145477	0.0011568	0.00137817	0	0	0	0	0
172	Alpha-enolase OS=Homo sapiens GN=ENO1 PE=1 SV=2	ENOA_HUMAN	47	7.46	Homo sapiens	5	6	5	4	2	4	2	4	7	0	0	0	0	0	0	0.106383	0.12766	0.106383	0.0851064	0.0425532	0.0851064	0.0425532	0.0851064	0.148936	0	0	0	0	0	0	0.00136179	0.00150245	0.00120322	0.00106768	0.000576035	0.00107733	0.000581909	0.0011568	0.00192943	0	0	0	0	0
173	Myosin regulatory light polypeptide 9 OS=Homo sapiens GN=MYL9 PE=1 SV=4	MYL9_HUMAN	20	4.54	Homo sapiens	7	8	8	6	6	6	5	6	7	0	0	0	0	0	0	0.35	0.4	0.4	0.3	0.3	0.3	0.25	0.3	0.35	0	0	0	0	0	0	0.00448028	0.00470769	0.00452411	0.00376355	0.00406105	0.00379757	0.00341872	0.00407771	0.00453416	0	0	0	0	0
174	Filaggrin-2 OS=Homo sapiens GN=FLG2 PE=1 SV=1	FILA2_HUMAN	248	8.35	Homo sapiens	4	4	5	0	2	0	0	6	3	0	5	5	6	0	0	0.016129	0.016129	0.0201613	0	0.00806452	0	0	0.0241935	0.0120968	0	0.0201613	0.0201613	0.0241935	0	0	0.000206465	0.000189826	0.00022803	0	0.000109168	0	0	0.000328847	0.000156711	0	0.000284996	0.000258214	0.000320832	0
175	Platelet glycoprotein Ib alpha chain OS=Homo sapiens GN=GP1BA PE=1 SV=2	GP1BA_HUMAN	72	6.24	Homo sapiens	7	6	7	8	8	8	4	5	3	0	0	0	0	0	0	0.0972222	0.0833333	0.0972222	0.111111	0.111111	0.111111	0.0555556	0.0694444	0.0416667	0	0	0	0	0	0	0.00124452	0.000980768	0.00109961	0.00139391	0.00150409	0.00140651	0.000759715	0.000943914	0.000539781	0	0	0	0	0
176	Inter-alpha-trypsin inhibitor heavy chain H3 OS=Homo sapiens GN=ITIH3 PE=1 SV=2	ITIH3_HUMAN	100	5.49	Homo sapiens	3	4	4	5	6	4	2	4	5	5	8	6	6	12	9	0.03	0.04	0.04	0.05	0.06	0.04	0.02	0.04	0.05	0.05	0.08	0.06	0.06	0.12	0.09	0.000384024	0.000470769	0.000452411	0.000627259	0.000812209	0.000506343	0.000273497	0.000543694	0.000647738	0.000665845	0.00113086	0.000768444	0.000795664	0.00145203
177	EGF-containing fibulin-like extracellular matrix protein 1 OS=Homo sapiens GN=EFEMP1 PE=1 SV=2	FBLN3_HUMAN	55	4.7	Homo sapiens	4	3	6	3	5	4	0	2	2	12	12	9	11	9	13	0.0727273	0.0545455	0.109091	0.0545455	0.0909091	0.0727273	0	0.0363636	0.0363636	0.218182	0.218182	0.163636	0.2	0.163636	0.236364	0.000930968	0.000641957	0.00123385	0.000684283	0.00123062	0.000920624	0	0.000494268	0.000471082	0.00290551	0.00308417	0.00209576	0.00265221	0.00198004
178	Apolipoprotein F OS=Homo sapiens GN=APOF PE=1 SV=2	APOF_HUMAN	35	5.36	Homo sapiens	0	0	0	0	0	0	0	0	0	3	2	0	0	3	5	0	0	0	0	0	0	0	0	0	0.0857143	0.0571429	0	0	0.0857143	0.142857	0	0	0	0	0	0	0	0	0	0.00114145	0.000807759	0	0	0.00103716
179	Carboxypeptidase N catalytic chain OS=Homo sapiens GN=CPN1 PE=1 SV=1	CBPN_HUMAN	52	7.36	Homo sapiens	0	2	2	2	3	3	4	3	2	4	4	3	4	3	5	0	0.0384615	0.0384615	0.0384615	0.0576923	0.0576923	0.0769231	0.0576923	0.0384615	0.0769231	0.0769231	0.0576923	0.0769231	0.0576923	0.0961538	0	0.000452662	0.000435011	0.000482507	0.00078097	0.000730303	0.00105191	0.000784174	0.00049826	0.00102438	0.00108737	0.000738888	0.00102008	0.00069809
180	Actin-related protein 3 OS=Homo sapiens GN=ACTR3 PE=1 SV=3	ARP3_HUMAN	47	5.69	Homo sapiens	6	5	6	5	5	6	7	4	7	0	0	0	0	0	0	0.12766	0.106383	0.12766	0.106383	0.106383	0.12766	0.148936	0.0851064	0.148936	0	0	0	0	0	0	0.00163415	0.00125204	0.00144387	0.00133459	0.00144009	0.00161599	0.00203668	0.0011568	0.00192943	0	0	0	0	0
181	P-selectin OS=Homo sapiens GN=SELP PE=1 SV=3	LYAM3_HUMAN	91	6.57	Homo sapiens	7	10	7	8	6	8	8	8	10	0	0	0	0	0	0	0.0769231	0.10989	0.0769231	0.0879121	0.0659341	0.0879121	0.0879121	0.0879121	0.10989	0	0	0	0	0	0	0.000984678	0.00129332	0.000870021	0.00110287	0.000892537	0.00111284	0.00120219	0.00119493	0.0014236	0	0	0	0	0
182	Apolipoprotein C-IV OS=Homo sapiens GN=APOC4 PE=1 SV=1	APOC4_HUMAN	15	9.13	Homo sapiens	0	0	0	0	0	0	0	0	0	5	9	4	5	8	11	0	0	0	0	0	0	0	0	0	0.333333	0.6	0.266667	0.333333	0.533333	0.733333	0	0	0	0	0	0	0	0	0	0.00443897	0.00848147	0.00341531	0.00442036	0.00645346
183	Coagulation factor X OS=Homo sapiens GN=F10 PE=1 SV=2	FA10_HUMAN	55	5.74	Homo sapiens	0	2	0	0	2	2	0	2	2	0	0	0	2	3	3	0	0.0363636	0	0	0.0363636	0.0363636	0	0.0363636	0.0363636	0	0	0	0.0363636	0.0545455	0.0545455	0	0.000427971	0	0	0.000492248	0.000460312	0	0.000494268	0.000471082	0	0	0	0.000482221	0.000660012
184	Endoplasmin OS=Homo sapiens GN=HSP90B1 PE=1 SV=1	ENPL_HUMAN	92	4.48	Homo sapiens	9	8	7	9	8	10	8	4	5	0	0	0	0	0	0	0.0978261	0.0869565	0.076087	0.0978261	0.0869565	0.108696	0.0869565	0.0434783	0.0543478	0	0	0	0	0	0	0.00125225	0.00102341	0.000860565	0.00122725	0.00117711	0.00137593	0.00118912	0.000590972	0.000704063	0	0	0	0	0
185	Afamin OS=Homo sapiens GN=AFM PE=1 SV=1	AFAM_HUMAN	69	5.7	Homo sapiens	2	2	0	0	0	2	0	2	0	10	6	6	5	10	11	0.0289855	0.0289855	0	0	0	0.0289855	0	0.0289855	0	0.144928	0.0869565	0.0869565	0.0724638	0.144928	0.15942	0.000371038	0.000341137	0	0	0	0.000366915	0	0.000393981	0	0.00192999	0.0012292	0.00111369	0.000960947	0.00175366
186	Serum amyloid P-component OS=Homo sapiens GN=APCS PE=1 SV=2	SAMP_HUMAN	25	6.52	Homo sapiens	2	0	0	2	0	0	0	2	2	7	5	6	7	7	6	0.08	0	0	0.08	0	0	0	0.08	0.08	0.28	0.2	0.24	0.28	0.28	0.24	0.00102406	0	0	0.00100361	0	0	0	0.00108739	0.00103638	0.00372873	0.00282716	0.00307378	0.0037131	0.00338806
187	Angiotensinogen OS=Homo sapiens GN=AGT PE=1 SV=1	ANGT_HUMAN	53	6.27	Homo sapiens	2	0	3	0	2	0	0	0	0	4	7	8	6	6	9	0.0377358	0	0.0566038	0	0.0377358	0	0	0	0	0.0754717	0.132075	0.150943	0.113208	0.113208	0.169811	0.000483049	0	0.000640204	0	0.000510823	0	0	0	0	0.00100505	0.00186699	0.00193319	0.00150125	0.00136984
188	N-acetylmuramoyl-L-alanine amidase OS=Homo sapiens GN=PGLYRP2 PE=1 SV=1	PGRP2_HUMAN	62	7.59	Homo sapiens	4	5	8	3	5	4	5	2	3	8	9	9	6	9	12	0.0645161	0.0806452	0.129032	0.0483871	0.0806452	0.0645161	0.0806452	0.0322581	0.0483871	0.129032	0.145161	0.145161	0.0967742	0.145161	0.193548	0.000825859	0.00094913	0.00145939	0.000607025	0.00109168	0.000816682	0.00110281	0.000438463	0.000626843	0.00171831	0.00205197	0.00185914	0.00128333	0.00175648
189	Histone H2B type 1-C/E/F/G/I OS=Homo sapiens GN=HIST1H2BC PE=1 SV=4	H2B1C_HUMAN (+4)	14	11	Homo sapiens	0	3	0	3	2	2	3	2	0	0	0	0	0	0	0	0	0.214286	0	0.214286	0.142857	0.142857	0.214286	0.142857	0	0	0	0	0	0	0	0	0.00252197	0	0.00268825	0.00193383	0.00180837	0.00293033	0.00194177	0	0	0	0	0	0
190	L-lactate dehydrogenase B chain OS=Homo sapiens GN=LDHB PE=1 SV=2	LDHB_HUMAN	37	5.93	Homo sapiens	5	5	4	3	5	6	5	4	5	2	0	0	0	0	0	0.135135	0.135135	0.108108	0.0810811	0.135135	0.162162	0.135135	0.108108	0.135135	0.0540541	0	0	0	0	0	0.00172984	0.00159043	0.00122273	0.00101718	0.0018293	0.00205274	0.00184796	0.00146944	0.00175064	0.000719833	0	0	0	0
191	Alpha-1-acid glycoprotein 2 OS=Homo sapiens GN=ORM2 PE=1 SV=2	A1AG2_HUMAN	24	4.76	Homo sapiens	0	3	3	0	0	0	0	0	0	7	8	6	6	7	7	0	0.125	0.125	0	0	0	0	0	0	0.291667	0.333333	0.25	0.25	0.291667	0.291667	0	0.00147115	0.00141378	0	0	0	0	0	0	0.0038841	0.00471193	0.00320185	0.00331527	0.00352923
192	Syntaxin-binding protein 2 OS=Homo sapiens GN=STXBP2 PE=1 SV=2	STXB2_HUMAN	66	6.52	Homo sapiens	8	10	8	6	6	6	9	7	9	0	0	0	0	0	0	0.121212	0.151515	0.121212	0.0909091	0.0909091	0.0909091	0.136364	0.106061	0.136364	0	0	0	0	0	0	0.00155161	0.00178321	0.00137094	0.00114047	0.00123062	0.00115078	0.00186476	0.00144161	0.00176656	0	0	0	0	0
193	Ras-related protein Rab-27B OS=Homo sapiens GN=RAB27B PE=1 SV=4	RB27B_HUMAN	25	5.13	Homo sapiens	5	5	5	3	3	5	3	4	3	0	0	0	0	0	0	0.2	0.2	0.2	0.12	0.12	0.2	0.12	0.16	0.12	0	0	0	0	0	0	0.00256016	0.00235384	0.00226206	0.00150542	0.00162442	0.00253172	0.00164098	0.00217478	0.00155457	0	0	0	0	0
194	Coagulation factor IX OS=Homo sapiens GN=F9 PE=1 SV=2	FA9_HUMAN	52	5.16	Homo sapiens	0	0	0	0	0	0	0	0	0	0	0	0	0	2	3	0	0	0	0	0	0	0	0	0	0	0	0	0	0.0384615	0.0576923	0	0	0	0	0	0	0	0	0	0	0	0	0	0.000465393
195	HLA class I histocompatibility antigen, B-40 alpha chain OS=Homo sapiens GN=HLA-B PE=1 SV=1	1B40_HUMAN	41	6.51	Homo sapiens	7	11	9	10	9	11	7	8	8	0	0	0	0	0	0	0.170732	0.268293	0.219512	0.243902	0.219512	0.268293	0.170732	0.195122	0.195122	0	0	0	0	0	0	0.0021855	0.00315759	0.00248274	0.0030598	0.0029715	0.0033962	0.00233473	0.00265217	0.00252776	0	0	0	0	0
196	14-3-3 protein gamma OS=Homo sapiens GN=YWHAG PE=1 SV=2	1433G_HUMAN	28	4.52	Homo sapiens	6	4	6	4	4	3	4	3	4	0	0	0	0	0	0	0.214286	0.142857	0.214286	0.142857	0.142857	0.107143	0.142857	0.107143	0.142857	0	0	0	0	0	0	0.00274303	0.00168132	0.00242363	0.00179217	0.00193383	0.00135628	0.00195355	0.00145632	0.00185068	0	0	0	0	0
197	Insulin-like growth factor-binding protein complex acid labile subunit OS=Homo sapiens GN=IGFALS PE=1 SV=1	ALS_HUMAN	66	6.78	Homo sapiens	0	2	0	0	0	3	2	0	0	0	0	3	7	7	8	0	0.030303	0	0	0	0.0454545	0.030303	0	0	0	0	0.0454545	0.106061	0.106061	0.121212	0	0.000356643	0	0	0	0.00057539	0.00041439	0	0	0	0	0.000582154	0.00140648	0.00128336
198	Dermcidin OS=Homo sapiens GN=DCD PE=1 SV=2	DCD_HUMAN	11	6.52	Homo sapiens	4	3	3	0	0	0	3	4	2	0	0	0	0	0	0	0.363636	0.272727	0.272727	0	0	0	0.272727	0.363636	0.181818	0	0	0	0	0	0	0.00465484	0.00320979	0.00308462	0	0	0	0.00372951	0.00494268	0.00235541	0	0	0	0	0
199	Serum amyloid A-1 protein OS=Homo sapiens GN=SAA1 PE=1 SV=1	SAA1_HUMAN	14	6.79	Homo sapiens	0	0	0	0	0	0	0	0	0	0	0	4	0	0	0	0	0	0	0	0	0	0	0	0	0	0	0.285714	0	0	0	0	0	0	0	0	0	0	0	0	0	0	0.00365926	0	0
200	Superoxide dismutase [Mn], mitochondrial OS=Homo sapiens GN=SOD2 PE=1 SV=2	SODM_HUMAN	25	8.45	Homo sapiens	6	8	8	5	4	5	6	5	6	0	0	0	0	0	0	0.24	0.32	0.32	0.2	0.16	0.2	0.24	0.2	0.24	0	0	0	0	0	0	0.00307219	0.00376615	0.00361929	0.00250904	0.00216589	0.00253172	0.00328197	0.00271847	0.00310914	0	0	0	0	0
201	Hexokinase-1 OS=Homo sapiens GN=HK1 PE=1 SV=3	HXK1_HUMAN	102	6.78	Homo sapiens	8	11	8	8	8	9	8	7	6	0	0	0	0	0	0	0.0784314	0.107843	0.0784314	0.0784314	0.0784314	0.0882353	0.0784314	0.0686275	0.0588235	0	0	0	0	0	0	0.00100399	0.00126923	0.000887081	0.000983936	0.00106171	0.00111693	0.00107254	0.000932809	0.000762044	0	0	0	0	0
202	Neutrophil defensin 3 OS=Homo sapiens GN=DEFA3 PE=1 SV=1	DEF3_HUMAN	10	5.79	Homo sapiens	0	2	2	2	0	2	0	2	2	3	2	2	2	0	2	0	0.2	0.2	0.2	0	0.2	0	0.2	0.2	0.3	0.2	0.2	0.2	0	0.2	0	0.00235384	0.00226206	0.00250904	0	0.00253172	0	0.00271847	0.00259095	0.00399507	0.00282716	0.00256148	0.00265221	0
203	Thromboxane-A synthase OS=Homo sapiens GN=TBXAS1 PE=1 SV=3	THAS_HUMAN	61	7.68	Homo sapiens	4	6	6	9	8	8	6	6	6	0	0	0	0	0	0	0.0655738	0.0983607	0.0983607	0.147541	0.131148	0.131148	0.0983607	0.0983607	0.0983607	0	0	0	0	0	0	0.000839397	0.00115763	0.00111249	0.00185093	0.00177532	0.00166014	0.00134507	0.00133695	0.00127424	0	0	0	0	0
204	Keratin, type I cytoskeletal 17 OS=Homo sapiens GN=KRT17 PE=1 SV=2	K1C17_HUMAN	48	4.67	Homo sapiens	0	0	0	7	6	7	0	0	0	18	13	14	15	10	12	0	0	0	0.145833	0.125	0.145833	0	0	0	0.375	0.270833	0.291667	0.3125	0.208333	0.25	0	0	0	0.00182951	0.0016921	0.00184604	0	0	0	0.00499384	0.00382844	0.00373549	0.00414408	0.00252088
205	Guanine nucleotide-binding protein G(I)/G(S)/G(T) subunit beta-1 OS=Homo sapiens GN=GNB1 PE=1 SV=3	GBB1_HUMAN	37	5.85	Homo sapiens	5	6	6	4	3	3	5	5	6	0	0	0	0	0	0	0.135135	0.162162	0.162162	0.108108	0.0810811	0.0810811	0.135135	0.135135	0.162162	0	0	0	0	0	0	0.00172984	0.00190852	0.0018341	0.00135624	0.00109758	0.00102637	0.00184796	0.00183681	0.00210077	0	0	0	0	0
206	Transgelin-2 OS=Homo sapiens GN=TAGLN2 PE=1 SV=3	TAGL2_HUMAN	22	8.45	Homo sapiens	3	3	7	5	5	5	6	6	5	0	0	0	0	0	0	0.136364	0.136364	0.318182	0.227273	0.227273	0.227273	0.272727	0.272727	0.227273	0	0	0	0	0	0	0.00174557	0.00160489	0.00359872	0.00285118	0.00307655	0.00287695	0.00372951	0.00370701	0.00294426	0	0	0	0	0
207	Beta-parvin OS=Homo sapiens GN=PARVB PE=1 SV=1	PARVB_HUMAN	42	6.72	Homo sapiens	3	4	3	7	5	7	3	2	3	0	0	0	0	0	0	0.0714286	0.0952381	0.0714286	0.166667	0.119048	0.166667	0.0714286	0.047619	0.0714286	0	0	0	0	0	0	0.000914344	0.00112088	0.000807877	0.00209086	0.00161153	0.00210976	0.000976777	0.000647255	0.00092534	0	0	0	0	0
208	Junction plakoglobin OS=Homo sapiens GN=JUP PE=1 SV=3	PLAK_HUMAN	82	6.05	Homo sapiens	0	0	0	0	0	0	2	2	0	6	5	4	7	0	0	0	0	0	0	0	0	0.0243902	0.0243902	0	0.0731707	0.0609756	0.0487805	0.0853659	0	0	0	0	0	0	0	0	0.000333533	0.000331521	0	0.000974408	0.000861938	0.000624751	0.00113204	0
209	Ig alpha-2 chain C region OS=Homo sapiens GN=IGHA2 PE=1 SV=3	IGHA2_HUMAN	37	6.02	Homo sapiens	0	0	0	13	0	8	0	0	0	17	12	17	12	18	19	0	0	0	0.351351	0	0.216216	0	0	0	0.459459	0.324324	0.459459	0.324324	0.486486	0.513514	0	0	0	0.00440777	0	0.00273699	0	0	0	0.00611858	0.00458458	0.00588448	0.00430089	0.0058866
210	Caldesmon OS=Homo sapiens GN=CALD1 PE=1 SV=3	CALD1_HUMAN	93	5.35	Homo sapiens	4	2	8	5	4	6	0	2	3	0	0	0	0	0	0	0.0430108	0.0215054	0.0860215	0.0537634	0.0430108	0.0645161	0	0.0215054	0.0322581	0	0	0	0	0	0	0.000550573	0.000253101	0.000972927	0.000674472	0.000582229	0.000816682	0	0.000292309	0.000417895	0	0	0	0	0
211	Actin, alpha cardiac muscle 1 OS=Homo sapiens GN=ACTC1 PE=1 SV=1	ACTC_HUMAN	42	5.05	Homo sapiens	45	41	46	47	44	48	45	42	45	0	0	0	0	0	0	1.07143	0.97619	1.09524	1.11905	1.04762	1.14286	1.07143	1	1.07143	0	0	0	0	0	0	0.0137152	0.011489	0.0123874	0.0140387	0.0141814	0.0144669	0.0146516	0.0135924	0.0138801	0	0	0	0	0
212	Junctional adhesion molecule A OS=Homo sapiens GN=F11R PE=1 SV=1	JAM1_HUMAN	33	8.02	Homo sapiens	6	6	4	3	5	6	4	5	4	0	0	0	0	0	0	0.181818	0.181818	0.121212	0.0909091	0.151515	0.181818	0.121212	0.151515	0.121212	0	0	0	0	0	0	0.00232742	0.00213986	0.00137094	0.00114047	0.00205103	0.00230156	0.00165756	0.00205945	0.00157027	0	0	0	0	0
213	Platelet glycoprotein Ib beta chain OS=Homo sapiens GN=GP1BB PE=1 SV=1	GP1BB_HUMAN	22	9.37	Homo sapiens	5	5	4	5	4	5	5	5	3	0	0	0	0	0	0	0.227273	0.227273	0.181818	0.227273	0.181818	0.227273	0.227273	0.227273	0.136364	0	0	0	0	0	0	0.00290928	0.00267482	0.00205641	0.00285118	0.00246124	0.00287695	0.00310793	0.00308917	0.00176656	0	0	0	0	0
214	Tetranectin OS=Homo sapiens GN=CLEC3B PE=1 SV=3	TETN_HUMAN	23	5.36	Homo sapiens	2	0	2	0	2	0	0	4	2	0	2	0	3	2	2	0.0869565	0	0.0869565	0	0.0869565	0	0	0.173913	0.0869565	0	0.0869565	0	0.130435	0.0869565	0.0869565	0.00111311	0	0.000983502	0	0.00117711	0	0	0.00236389	0.0011265	0	0.0012292	0	0.0017297	0.00105219
215	Complement C4-A OS=Homo sapiens GN=C4A PE=1 SV=2	CO4A_HUMAN	193	7.08	Homo sapiens	97	93	88	87	0	70	74	70	76	122	130	135	141	124	133	0.502591	0.481865	0.455959	0.450777	0	0.362694	0.38342	0.362694	0.393782	0.632124	0.673575	0.699482	0.73057	0.642487	0.689119	0.00643357	0.00567118	0.00515702	0.00565508	0	0.00459119	0.00524322	0.00492987	0.00510135	0.00841794	0.00952151	0.00895854	0.00968814	0.00777424
216	Calnexin OS=Homo sapiens GN=CANX PE=1 SV=2	CALX_HUMAN	68	4.21	Homo sapiens	4	3	3	3	3	4	2	2	4	0	0	0	0	0	0	0.0588235	0.0441176	0.0441176	0.0441176	0.0441176	0.0588235	0.0294118	0.0294118	0.0588235	0	0	0	0	0	0	0.000752989	0.00051923	0.000498983	0.000553464	0.000597213	0.000744622	0.000402202	0.000399775	0.000762044	0	0	0	0	0
217	Tubulin alpha-4A chain OS=Homo sapiens GN=TUBA4A PE=1 SV=1	TBA4A_HUMAN	50	4.69	Homo sapiens	17	20	22	19	16	17	19	16	19	0	0	0	0	0	0	0.34	0.4	0.44	0.38	0.32	0.34	0.38	0.32	0.38	0	0	0	0	0	0	0.00435228	0.00470769	0.00497652	0.00476717	0.00433178	0.00430392	0.00519645	0.00434955	0.00492281	0	0	0	0	0
218	Sulfhydryl oxidase 1 OS=Homo sapiens GN=QSOX1 PE=1 SV=3	QSOX1_HUMAN	83	9.18	Homo sapiens	3	4	3	2	3	3	0	0	0	5	6	6	7	7	11	0.0361446	0.0481928	0.0361446	0.0240964	0.0361446	0.0361446	0	0	0	0.060241	0.0722892	0.0722892	0.0843373	0.0843373	0.13253	0.00046268	0.000567191	0.000408805	0.000302294	0.000489283	0.000457539	0	0	0	0.000802223	0.00102186	0.000925836	0.0011184	0.0010205
219	Voltage-dependent anion-selective channel protein 3 OS=Homo sapiens GN=VDAC3 PE=1 SV=1	VDAC3_HUMAN	31	8.9	Homo sapiens	6	3	7	4	4	7	5	7	5	0	0	0	0	0	0	0.193548	0.0967742	0.225806	0.129032	0.129032	0.225806	0.16129	0.225806	0.16129	0	0	0	0	0	0	0.00247758	0.00113896	0.00255393	0.00161873	0.00174669	0.00285839	0.00220562	0.00306924	0.00208948	0	0	0	0	0
220	Solute carrier family 2, facilitated glucose transporter member 1 OS=Homo sapiens GN=SLC2A1 PE=1 SV=2	GTR1_HUMAN	54	8.92	Homo sapiens	2	0	0	0	2	2	2	2	3	0	0	0	0	0	0	0.037037	0	0	0	0.037037	0.037037	0.037037	0.037037	0.0555556	0	0	0	0	0	0	0.000474104	0	0	0	0.000501364	0.000468836	0.000506477	0.000503421	0.000719709	0	0	0	0	0
221	Sarcoplasmic/endoplasmic reticulum calcium ATPase 2 OS=Homo sapiens GN=ATP2A2 PE=1 SV=1	AT2A2_HUMAN	115	4.99	Homo sapiens	0	7	9	9	7	8	7	6	7	0	0	0	0	0	0	0	0.0608696	0.0782609	0.0782609	0.0608696	0.0695652	0.0608696	0.0521739	0.0608696	0	0	0	0	0	0	0	0.000716387	0.000885152	0.000981797	0.00082398	0.000880597	0.000832383	0.000709166	0.00078855	0	0	0	0	0
222	Protein S100-A8 OS=Homo sapiens GN=S100A8 PE=1 SV=1	S10A8_HUMAN	11	7.07	Homo sapiens	0	0	0	2	2	0	0	0	0	3	3	0	3	0	0	0	0	0	0.181818	0.181818	0	0	0	0	0.272727	0.272727	0	0.272727	0	0	0	0	0	0.00228094	0.00246124	0	0	0	0	0.00363188	0.00385521	0	0.00361666	0
223	Monocyte differentiation antigen CD14 OS=Homo sapiens GN=CD14 PE=1 SV=2	CD14_HUMAN	40	6.16	Homo sapiens	3	4	3	0	3	3	4	0	2	2	5	3	3	3	7	0.075	0.1	0.075	0	0.075	0.075	0.1	0	0.05	0.05	0.125	0.075	0.075	0.075	0.175	0.000960061	0.00117692	0.000848271	0	0.00101526	0.000949393	0.00136749	0	0.000647738	0.000665845	0.00176697	0.000960555	0.00099458	0.000907517
224	Transforming protein RhoA OS=Homo sapiens GN=RHOA PE=1 SV=1	RHOA_HUMAN	22	5.89	Homo sapiens	4	4	6	3	3	2	5	5	5	0	0	0	0	0	0	0.181818	0.181818	0.272727	0.136364	0.136364	0.0909091	0.227273	0.227273	0.227273	0	0	0	0	0	0	0.00232742	0.00213986	0.00308462	0.00171071	0.00184593	0.00115078	0.00310793	0.00308917	0.00294426	0	0	0	0	0
225	ADP/ATP translocase 2 OS=Homo sapiens GN=SLC25A5 PE=1 SV=7	ADT2_HUMAN	33	10.18	Homo sapiens	3	4	5	3	4	5	5	4	4	0	0	0	0	0	0	0.0909091	0.121212	0.151515	0.0909091	0.121212	0.151515	0.151515	0.121212	0.121212	0	0	0	0	0	0	0.00116371	0.00142657	0.00171368	0.00114047	0.00164083	0.00191797	0.00207195	0.00164756	0.00157027	0	0	0	0	0
226	14-3-3 protein eta OS=Homo sapiens GN=YWHAH PE=1 SV=4	1433F_HUMAN	28	4.47	Homo sapiens	4	6	4	5	2	5	6	3	5	0	0	0	0	0	0	0.142857	0.214286	0.142857	0.178571	0.0714286	0.178571	0.214286	0.107143	0.178571	0	0	0	0	0	0	0.00182869	0.00252197	0.00161575	0.00224021	0.000966916	0.00226046	0.00293033	0.00145632	0.00231335	0	0	0	0	0
227	PDZ and LIM domain protein 1 OS=Homo sapiens GN=PDLIM1 PE=1 SV=4	PDLI1_HUMAN	36	7.03	Homo sapiens	5	6	9	5	7	4	3	4	7	0	0	0	0	0	0	0.138889	0.166667	0.25	0.138889	0.194444	0.111111	0.0833333	0.111111	0.194444	0	0	0	0	0	0	0.00177789	0.00196154	0.00282757	0.00174239	0.00263216	0.00140651	0.00113957	0.00151026	0.00251898	0	0	0	0	0
228	Actin-related protein 2/3 complex subunit 1B OS=Homo sapiens GN=ARPC1B PE=1 SV=3	ARC1B_HUMAN	41	8.44	Homo sapiens	4	2	3	3	3	3	2	3	4	0	0	0	0	0	0	0.097561	0.0487805	0.0731707	0.0731707	0.0731707	0.0731707	0.0487805	0.0731707	0.097561	0	0	0	0	0	0	0.00124886	0.000574108	0.000827581	0.00091794	0.000990499	0.000926237	0.000667067	0.000994563	0.00126388	0	0	0	0	0
229	Complement factor I OS=Homo sapiens GN=CFI PE=1 SV=2	CFAI_HUMAN	66	7.53	Homo sapiens	0	0	0	0	3	2	0	0	0	5	3	5	4	9	10	0	0	0	0	0.0454545	0.030303	0	0	0	0.0757576	0.0454545	0.0757576	0.0606061	0.136364	0.151515	0	0	0	0	0.00061531	0.000383593	0	0	0	0.00100886	0.000642535	0.000970257	0.000803701	0.00165003
230	EMILIN-1 OS=Homo sapiens GN=EMILIN1 PE=1 SV=2	EMIL1_HUMAN	107	4.81	Homo sapiens	6	4	8	7	4	7	5	5	6	0	0	0	0	0	0	0.0560748	0.0373832	0.0747664	0.0654206	0.0373832	0.0654206	0.046729	0.046729	0.0560748	0	0	0	0	0	0	0.000717803	0.000439971	0.000845628	0.000820713	0.000506049	0.000828131	0.000639013	0.000635157	0.000726435	0	0	0	0	0
231	Ras suppressor protein 1 OS=Homo sapiens GN=RSU1 PE=1 SV=3	RSU1_HUMAN	32	9.16	Homo sapiens	4	3	4	2	4	2	3	0	2	0	0	0	0	0	0	0.125	0.09375	0.125	0.0625	0.125	0.0625	0.09375	0	0.0625	0	0	0	0	0	0	0.0016001	0.00110336	0.00141378	0.000784074	0.0016921	0.000791161	0.00128202	0	0.000809672	0	0	0	0	0
232	Integrin alpha-M OS=Homo sapiens GN=ITGAM PE=1 SV=2	ITAM_HUMAN	127	7.24	Homo sapiens	0	0	0	0	0	0	0	0	0	0	0	0	0	0	0	0	0	0	0	0	0	0	0	0	0	0	0	0	0	0	0	0	0	0	0	0	0	0	0	0	0	0	0	0
233	Platelet glycoprotein V OS=Homo sapiens GN=GP5 PE=1 SV=1	GPV_HUMAN	61	10.24	Homo sapiens	0	6	4	4	3	4	5	6	3	0	0	0	0	0	0	0	0.0983607	0.0655738	0.0655738	0.0491803	0.0655738	0.0819672	0.0983607	0.0491803	0	0	0	0	0	0	0	0.00115763	0.000741658	0.000822635	0.000665745	0.000830071	0.00112089	0.00133695	0.000637119	0	0	0	0	0
234	Complement C2 OS=Homo sapiens GN=C2 PE=1 SV=2	CO2_HUMAN	83	7.43	Homo sapiens	0	0	0	0	0	0	0	0	0	5	2	8	2	4	8	0	0	0	0	0	0	0	0	0	0.060241	0.0240964	0.0963855	0.0240964	0.0481928	0.0963855	0	0	0	0	0	0	0	0	0	0.000802223	0.000340621	0.00123445	0.000319544	0.000583144
235	Ig kappa chain V-I region WEA OS=Homo sapiens PE=1 SV=1	KV118_HUMAN	12	9.15	Homo sapiens	0	3	0	3	2	0	2	0	0	0	0	0	0	3	0	0	0.25	0	0.25	0.166667	0	0.166667	0	0	0	0	0	0	0.25	0	0	0.0029423	0	0.0031363	0.00225614	0	0.00227915	0	0	0	0	0	0	0.00302506
236	Desmoglein-1 OS=Homo sapiens GN=DSG1 PE=1 SV=2	DSG1_HUMAN	114	4.66	Homo sapiens	0	0	0	0	0	0	2	2	3	5	3	0	0	0	0	0	0	0	0	0	0	0.0175439	0.0175439	0.0263158	0.0438596	0.0263158	0	0	0	0	0	0	0	0	0	0	0.00023991	0.000238462	0.000340915	0.000584075	0.000371994	0	0	0
237	Cholesteryl ester transfer protein OS=Homo sapiens GN=CETP PE=1 SV=2	CETP_HUMAN	55	6.02	Homo sapiens	2	3	6	0	0	0	2	0	2	7	8	8	9	8	10	0.0363636	0.0545455	0.109091	0	0	0	0.0363636	0	0.0363636	0.127273	0.145455	0.145455	0.163636	0.145455	0.181818	0.000465484	0.000641957	0.00123385	0	0	0	0.000497268	0	0.000471082	0.00169488	0.00205611	0.00186289	0.00216999	0.00176003
238	F-actin-capping protein subunit beta OS=Homo sapiens GN=CAPZB PE=1 SV=4	CAPZB_HUMAN	31	5.23	Homo sapiens	3	3	5	3	2	3	5	4	3	0	0	0	0	0	0	0.0967742	0.0967742	0.16129	0.0967742	0.0645161	0.0967742	0.16129	0.129032	0.0967742	0	0	0	0	0	0	0.00123879	0.00113896	0.00182424	0.00121405	0.000873343	0.00122502	0.00220562	0.00175385	0.00125369	0	0	0	0	0
239	Filaggrin OS=Homo sapiens GN=FLG PE=1 SV=3	FILA_HUMAN	435	9.6	Homo sapiens	0	0	0	0	0	0	0	0	0	0	0	0	0	0	0	0	0	0	0	0	0	0	0	0	0	0	0	0	0	0	0	0	0	0	0	0	0	0	0	0	0	0	0	0
240	Ig heavy chain V-III region TIL OS=Homo sapiens PE=1 SV=1	HV304_HUMAN	12	9.4	Homo sapiens	0	0	0	0	0	0	0	0	0	0	0	0	0	0	0	0	0	0	0	0	0	0	0	0	0	0	0	0	0	0	0	0	0	0	0	0	0	0	0	0	0	0	0	0
241	14-3-3 protein epsilon OS=Homo sapiens GN=YWHAE PE=1 SV=1	1433E_HUMAN	29	4.36	Homo sapiens	3	5	5	2	4	4	3	4	4	0	0	0	0	0	0	0.103448	0.172414	0.172414	0.0689655	0.137931	0.137931	0.103448	0.137931	0.137931	0	0	0	0	0	0	0.00132422	0.00202917	0.00195005	0.000865185	0.00186715	0.00174601	0.00141464	0.00187481	0.00178686	0	0	0	0	0
242	Peroxisomal multifunctional enzyme type 2 OS=Homo sapiens GN=HSD17B4 PE=1 SV=3	DHB4_HUMAN	80	9.21	Homo sapiens	6	8	4	3	5	5	3	5	8	0	0	0	0	0	0	0.075	0.1	0.05	0.0375	0.0625	0.0625	0.0375	0.0625	0.1	0	0	0	0	0	0	0.000960061	0.00117692	0.000565514	0.000470444	0.000846051	0.000791161	0.000512808	0.000849522	0.00129548	0	0	0	0	0
243	Retinol-binding protein 4 OS=Homo sapiens GN=RBP4 PE=1 SV=3	RET4_HUMAN	23	5.85	Homo sapiens	0	0	0	0	0	0	0	0	0	5	6	3	6	5	6	0	0	0	0	0	0	0	0	0	0.217391	0.26087	0.130435	0.26087	0.217391	0.26087	0	0	0	0	0	0	0	0	0	0.00289498	0.00368759	0.00167053	0.00345941	0.00263048
244	Kallistatin OS=Homo sapiens GN=SERPINA4 PE=1 SV=3	KAIN_HUMAN	49	7.85	Homo sapiens	0	0	0	0	0	0	0	0	0	6	6	9	8	9	11	0	0	0	0	0	0	0	0	0	0.122449	0.122449	0.183673	0.163265	0.183673	0.22449	0	0	0	0	0	0	0	0	0	0.00163064	0.00173091	0.00235238	0.00216507	0.00222249
245	Zinc-alpha-2-glycoprotein OS=Homo sapiens GN=AZGP1 PE=1 SV=2	ZA2G_HUMAN	34	5.92	Homo sapiens	0	0	0	0	0	0	0	0	0	4	3	3	5	7	10	0	0	0	0	0	0	0	0	0	0.117647	0.0882353	0.0882353	0.147059	0.205882	0.294118	0	0	0	0	0	0	0	0	0	0.00156669	0.00124727	0.00113006	0.00195016	0.00249122
246	Tropomyosin alpha-3 chain OS=Homo sapiens GN=TPM3 PE=1 SV=2	TPM3_HUMAN	33	4.38	Homo sapiens	8	0	8	9	0	9	0	0	0	0	0	0	0	0	0	0.242424	0	0.242424	0.272727	0	0.272727	0	0	0	0	0	0	0	0	0	0.00310323	0	0.00274189	0.00342141	0	0.00345234	0	0	0	0	0	0	0	0
247	Peptidyl-prolyl cis-trans isomerase F, mitochondrial OS=Homo sapiens GN=PPIF PE=1 SV=1	PPIF_HUMAN	22	9.95	Homo sapiens	6	4	3	4	4	4	4	3	6	0	0	0	0	0	0	0.272727	0.181818	0.136364	0.181818	0.181818	0.181818	0.181818	0.136364	0.272727	0	0	0	0	0	0	0.00349113	0.00213986	0.00154231	0.00228094	0.00246124	0.00230156	0.00248634	0.0018535	0.00353311	0	0	0	0	0
248	Phosphatidylinositide phosphatase SAC1 OS=Homo sapiens GN=SACM1L PE=1 SV=2	SAC1_HUMAN	67	7.13	Homo sapiens	7	5	5	4	4	2	5	3	4	0	0	0	0	0	0	0.104478	0.0746269	0.0746269	0.0597015	0.0597015	0.0298507	0.0746269	0.0447761	0.0597015	0	0	0	0	0	0	0.0013374	0.000878299	0.000844051	0.000748966	0.000808168	0.000377868	0.00102051	0.000608613	0.000773418	0	0	0	0	0
249	CD9 antigen OS=Homo sapiens GN=CD9 PE=1 SV=4	CD9_HUMAN	25	7.19	Homo sapiens	2	2	3	0	0	0	0	2	0	0	0	0	0	0	0	0.08	0.08	0.12	0	0	0	0	0.08	0	0	0	0	0	0	0	0.00102406	0.000941537	0.00135723	0	0	0	0	0.00108739	0	0	0	0	0	0
250	Angiogenin OS=Homo sapiens GN=ANG PE=1 SV=1	ANGI_HUMAN	17	10.09	Homo sapiens	3	0	0	3	0	2	0	3	0	0	0	0	0	0	0	0.176471	0	0	0.176471	0	0.117647	0	0.176471	0	0	0	0	0	0	0	0.00225897	0	0	0.00221386	0	0.00148924	0	0.00239865	0	0	0	0	0	0
251	Phospholipid transfer protein OS=Homo sapiens GN=PLTP PE=1 SV=1	PLTP_HUMAN	55	7.01	Homo sapiens	2	3	3	3	0	0	0	0	0	4	3	3	3	3	3	0.0363636	0.0545455	0.0545455	0.0545455	0	0	0	0	0	0.0727273	0.0545455	0.0545455	0.0545455	0.0545455	0.0545455	0.000465484	0.000641957	0.000616924	0.000684283	0	0	0	0	0	0.000968502	0.000771042	0.000698585	0.000723331	0.000660012
252	Glutathione peroxidase 3 OS=Homo sapiens GN=GPX3 PE=1 SV=2	GPX3_HUMAN	26	8.29	Homo sapiens	0	0	0	0	0	0	0	0	0	7	7	6	6	7	8	0	0	0	0	0	0	0	0	0	0.269231	0.269231	0.230769	0.230769	0.269231	0.307692	0	0	0	0	0	0	0	0	0	0.00358532	0.00380579	0.00295555	0.00306025	0.00325775
253	Thymosin beta-4 OS=Homo sapiens GN=TMSB4X PE=1 SV=2	TYB4_HUMAN	5	4.72	Homo sapiens	3	2	3	2	3	3	0	4	3	0	0	0	0	0	0	0.6	0.4	0.6	0.4	0.6	0.6	0	0.8	0.6	0	0	0	0	0	0	0.00768049	0.00470769	0.00678617	0.00501807	0.00812209	0.00759515	0	0.0108739	0.00777285	0	0	0	0	0
254	Malate dehydrogenase, mitochondrial OS=Homo sapiens GN=MDH2 PE=1 SV=3	MDHM_HUMAN	36	8.9	Homo sapiens	6	5	3	7	4	4	5	3	5	0	0	0	0	0	0	0.166667	0.138889	0.0833333	0.194444	0.111111	0.111111	0.138889	0.0833333	0.138889	0	0	0	0	0	0	0.00213347	0.00163461	0.000942523	0.00243934	0.00150409	0.00140651	0.00189929	0.0011327	0.00179927	0	0	0	0	0
255	Histone H2A type 1-D OS=Homo sapiens GN=HIST1H2AD PE=1 SV=2	H2A1D_HUMAN (+6)	14	11.55	Homo sapiens	0	0	0	0	2	0	0	0	0	0	0	0	0	0	0	0	0	0	0	0.142857	0	0	0	0	0	0	0	0	0	0	0	0	0	0	0.00193383	0	0	0	0	0	0	0	0	0
256	HLA class I histocompatibility antigen, A-3 alpha chain OS=Homo sapiens GN=HLA-A PE=1 SV=2	1A03_HUMAN	41	5.85	Homo sapiens	6	8	7	8	6	8	5	7	9	0	0	0	0	0	0	0.146341	0.195122	0.170732	0.195122	0.146341	0.195122	0.121951	0.170732	0.219512	0	0	0	0	0	0	0.00187329	0.00229643	0.00193102	0.00244784	0.001981	0.00246997	0.00166767	0.00232065	0.00284373	0	0	0	0	0
257	Triosephosphate isomerase OS=Homo sapiens GN=TPI1 PE=1 SV=3	TPIS_HUMAN	31	5.72	Homo sapiens	3	6	6	4	2	4	3	2	3	0	0	0	0	0	0	0.0967742	0.193548	0.193548	0.129032	0.0645161	0.129032	0.0967742	0.0645161	0.0967742	0	0	0	0	0	0	0.00123879	0.00227791	0.00218909	0.00161873	0.000873343	0.00163336	0.00132337	0.000876926	0.00125369	0	0	0	0	0
258	Receptor-type tyrosine-protein phosphatase eta OS=Homo sapiens GN=PTPRJ PE=1 SV=3	PTPRJ_HUMAN	146	5.28	Homo sapiens	5	5	5	3	2	2	3	7	4	0	0	0	0	0	0	0.0342466	0.0342466	0.0342466	0.0205479	0.0136986	0.0136986	0.0205479	0.0479452	0.0273973	0	0	0	0	0	0	0.000438384	0.000403055	0.000387338	0.000257778	0.000185436	0.000173405	0.000280991	0.000651688	0.000354925	0	0	0	0	0
259	Ig mu heavy chain disease protein OS=Homo sapiens PE=1 SV=1	MUCB_HUMAN	43	4.89	Homo sapiens	36	0	0	0	0	31	0	0	0	0	0	0	0	0	0	0.837209	0	0	0	0	0.72093	0	0	0	0	0	0	0	0	0	0.010717	0	0	0	0	0.00912595	0	0	0	0	0	0	0	0
260	Protein disulfide-isomerase OS=Homo sapiens GN=P4HB PE=1 SV=3	PDIA1_HUMAN	57	4.49	Homo sapiens	3	5	4	3	2	4	3	3	4	0	0	0	0	0	0	0.0526316	0.0877193	0.0701754	0.0526316	0.0350877	0.0701754	0.0526316	0.0526316	0.0701754	0	0	0	0	0	0	0.000673727	0.00103239	0.000793704	0.000660273	0.000474976	0.000888321	0.00071973	0.000715387	0.000909106	0	0	0	0	0
261	Integrin beta-2 OS=Homo sapiens GN=ITGB2 PE=1 SV=2	ITB2_HUMAN	85	6.94	Homo sapiens	0	0	0	0	0	0	0	0	0	0	0	0	0	0	0	0	0	0	0	0	0	0	0	0	0	0	0	0	0	0	0	0	0	0	0	0	0	0	0	0	0	0	0	0
262	Complement factor H-related protein 2 OS=Homo sapiens GN=CFHR2 PE=1 SV=1	FHR2_HUMAN	31	6.34	Homo sapiens	9	10	14	10	0	12	10	0	0	0	0	0	0	0	0	0.290323	0.322581	0.451613	0.322581	0	0.387097	0.322581	0	0	0	0	0	0	0	0	0.00371636	0.00379652	0.00510787	0.00404683	0	0.00490009	0.00441125	0	0	0	0	0	0	0
263	Lysozyme C OS=Homo sapiens GN=LYZ PE=1 SV=1	LYSC_HUMAN	17	9.35	Homo sapiens	0	0	2	0	0	0	0	0	2	0	0	0	0	0	0	0	0	0.117647	0	0	0	0	0	0.117647	0	0	0	0	0	0	0	0	0.00133062	0	0	0	0	0	0.00152409	0	0	0	0	0
264	Tyrosine-protein kinase Lyn OS=Homo sapiens GN=LYN PE=1 SV=3	LYN_HUMAN	59	7.13	Homo sapiens	3	3	6	3	3	3	4	4	5	0	0	0	0	0	0	0.0508475	0.0508475	0.101695	0.0508475	0.0508475	0.0508475	0.0677966	0.0677966	0.0847458	0	0	0	0	0	0	0.000650889	0.000598435	0.0011502	0.000637891	0.000688313	0.000643656	0.00092711	0.000921516	0.00109786	0	0	0	0	0
265	Prostaglandin G/H synthase 1 OS=Homo sapiens GN=PTGS1 PE=1 SV=2	PGH1_HUMAN	69	7.25	Homo sapiens	0	4	5	4	2	3	2	2	4	0	0	0	0	0	0	0	0.057971	0.0724638	0.057971	0.0289855	0.0434783	0.0289855	0.0289855	0.057971	0	0	0	0	0	0	0	0.000682273	0.000819585	0.000727257	0.000392372	0.000550373	0.000396373	0.000393981	0.000751	0	0	0	0	0
266	Complement factor H-related protein 4 OS=Homo sapiens GN=CFHR4 PE=1 SV=3	FHR4_HUMAN	65	4.58	Homo sapiens	0	0	0	0	0	0	0	0	0	2	2	3	3	2	2	0	0	0	0	0	0	0	0	0	0.0307692	0.0307692	0.0461538	0.0461538	0.0307692	0.0307692	0	0	0	0	0	0	0	0	0	0.000409751	0.000434947	0.000591111	0.000612049	0.000372315
267	Ig heavy chain V-III region GAL OS=Homo sapiens PE=1 SV=1	HV320_HUMAN	13	8.7	Homo sapiens	0	2	2	2	0	0	0	0	0	4	5	4	2	5	3	0	0.153846	0.153846	0.153846	0	0	0	0	0	0.307692	0.384615	0.307692	0.153846	0.384615	0.230769	0	0.00181065	0.00174004	0.00193003	0	0	0	0	0	0.00409751	0.00543684	0.00394074	0.00204016	0.00465393
268	Phosphoglycerate kinase 1 OS=Homo sapiens GN=PGK1 PE=1 SV=3	PGK1_HUMAN	45	8.27	Homo sapiens	0	0	3	2	3	0	0	2	4	0	0	0	0	0	0	0	0	0.0666667	0.0444444	0.0666667	0	0	0.0444444	0.0888889	0	0	0	0	0	0	0	0	0.000754019	0.000557564	0.000902454	0	0	0.000604105	0.00115153	0	0	0	0	0
269	Erythrocyte membrane protein band 4.2 OS=Homo sapiens GN=EPB42 PE=1 SV=3	EPB42_HUMAN	77	8.17	Homo sapiens	0	2	2	0	0	0	0	2	0	0	0	0	0	0	0	0	0.025974	0.025974	0	0	0	0	0.025974	0	0	0	0	0	0	0	0	0.000305694	0.000293773	0	0	0	0	0.000353048	0	0	0	0	0	0
270	Guanine nucleotide-binding protein G(q) subunit alpha OS=Homo sapiens GN=GNAQ PE=1 SV=4	GNAQ_HUMAN	42	5.37	Homo sapiens	3	4	5	3	2	3	3	0	0	0	0	0	0	0	0	0.0714286	0.0952381	0.119048	0.0714286	0.047619	0.0714286	0.0714286	0	0	0	0	0	0	0	0	0.000914344	0.00112088	0.00134646	0.000896085	0.00064461	0.000904184	0.000976777	0	0	0	0	0	0	0
271	Ig kappa chain V-IV region B17 OS=Homo sapiens PE=2 SV=1	KV404_HUMAN	15	6.51	Homo sapiens	0	0	0	3	3	0	0	0	0	0	2	2	0	2	2	0	0	0	0.2	0.2	0	0	0	0	0	0.133333	0.133333	0	0.133333	0.133333	0	0	0	0.00250904	0.00270736	0	0	0	0	0	0.00188477	0.00170765	0	0.00161336
272	C4b-binding protein beta chain OS=Homo sapiens GN=C4BPB PE=1 SV=1	C4BPB_HUMAN	28	4.8	Homo sapiens	2	2	0	0	0	0	0	0	0	2	2	2	2	2	4	0.0714286	0.0714286	0	0	0	0	0	0	0	0.0714286	0.0714286	0.0714286	0.0714286	0.0714286	0.142857	0.000914344	0.000840658	0	0	0	0	0	0	0	0.000951207	0.0010097	0.000914814	0.000947219	0.000864302
273	Retinol dehydrogenase 11 OS=Homo sapiens GN=RDH11 PE=1 SV=2	RDH11_HUMAN	35	9.06	Homo sapiens	0	2	2	2	0	4	2	3	3	0	0	0	0	0	0	0	0.0571429	0.0571429	0.0571429	0	0.114286	0.0571429	0.0857143	0.0857143	0	0	0	0	0	0	0	0.000672526	0.000646302	0.000716868	0	0.00144669	0.000781421	0.00116506	0.00111041	0	0	0	0	0
274	Ig heavy chain V-III region BUT OS=Homo sapiens PE=1 SV=1	HV306_HUMAN	12	9.48	Homo sapiens	0	0	0	0	0	0	0	0	0	2	2	0	2	3	3	0	0	0	0	0	0	0	0	0	0.166667	0.166667	0	0.166667	0.25	0.25	0	0	0	0	0	0	0	0	0	0.00221948	0.00235596	0	0.00221018	0.00302506
275	EH domain-containing protein 3 OS=Homo sapiens GN=EHD3 PE=1 SV=2	EHD3_HUMAN	61	6.53	Homo sapiens	2	2	2	2	0	2	3	2	0	0	0	0	0	0	0	0.0327869	0.0327869	0.0327869	0.0327869	0	0.0327869	0.0491803	0.0327869	0	0	0	0	0	0	0	0.000419699	0.000385876	0.000370829	0.000411317	0	0.000415035	0.000672535	0.000445651	0	0	0	0	0	0
276	Amine oxidase [flavin-containing] B OS=Homo sapiens GN=MAOB PE=1 SV=3	AOFB_HUMAN	59	7.55	Homo sapiens	3	0	3	2	3	3	3	2	3	0	0	0	0	0	0	0.0508475	0	0.0508475	0.0338983	0.0508475	0.0508475	0.0508475	0.0338983	0.0508475	0	0	0	0	0	0	0.000650889	0	0.000575099	0.00042526	0.000688313	0.000643656	0.000695332	0.000460758	0.000658716	0	0	0	0	0
277	Cathelicidin antimicrobial peptide OS=Homo sapiens GN=CAMP PE=1 SV=1	CAMP_HUMAN	19	10.03	Homo sapiens	0	0	0	0	0	0	0	0	0	0	3	2	2	3	3	0	0	0	0	0	0	0	0	0	0	0.157895	0.105263	0.105263	0.157895	0.157895	0	0	0	0	0	0	0	0	0	0	0.00223197	0.00134815	0.0013959	0.00191056
278	Actin-related protein 2 OS=Homo sapiens GN=ACTR2 PE=1 SV=1	ARP2_HUMAN	45	6.72	Homo sapiens	3	3	2	2	2	3	2	4	3	0	0	0	0	0	0	0.0666667	0.0666667	0.0444444	0.0444444	0.0444444	0.0666667	0.0444444	0.0888889	0.0666667	0	0	0	0	0	0	0.000853387	0.000784614	0.000502679	0.000557564	0.000601636	0.000843905	0.000607772	0.00120821	0.00086365	0	0	0	0	0
279	Calponin-2 OS=Homo sapiens GN=CNN2 PE=1 SV=4	CNN2_HUMAN	34	7.38	Homo sapiens	0	2	6	2	3	4	2	5	5	0	0	0	0	0	0	0	0.0588235	0.176471	0.0588235	0.0882353	0.117647	0.0588235	0.147059	0.147059	0	0	0	0	0	0	0	0.000692307	0.00199593	0.000737952	0.00119443	0.00148924	0.000804404	0.00199888	0.00190511	0	0	0	0	0
280	Voltage-dependent anion-selective channel protein 2 OS=Homo sapiens GN=VDAC2 PE=1 SV=2	VDAC2_HUMAN	32	7.65	Homo sapiens	2	3	3	3	2	4	2	2	0	0	0	0	0	0	0	0.0625	0.09375	0.09375	0.09375	0.0625	0.125	0.0625	0.0625	0	0	0	0	0	0	0	0.000800051	0.00110336	0.00106034	0.00117611	0.000846051	0.00158232	0.000854679	0.000849522	0	0	0	0	0	0
281	Stress-70 protein, mitochondrial OS=Homo sapiens GN=HSPA9 PE=1 SV=2	GRP75_HUMAN	74	6.01	Homo sapiens	3	4	4	2	2	3	4	4	0	0	0	0	0	0	0	0.0405405	0.0540541	0.0540541	0.027027	0.027027	0.0405405	0.0540541	0.0540541	0	0	0	0	0	0	0	0.000518952	0.000636174	0.000611366	0.000339059	0.00036586	0.000513186	0.000739182	0.000734722	0	0	0	0	0	0
282	Carboxypeptidase B2 OS=Homo sapiens GN=CPB2 PE=1 SV=2	CBPB2_HUMAN	48	7.77	Homo sapiens	0	0	2	0	0	0	0	0	0	4	8	4	6	7	9	0	0	0.0416667	0	0	0	0	0	0	0.0833333	0.166667	0.0833333	0.125	0.145833	0.1875	0	0	0.000471262	0	0	0	0	0	0	0.00110974	0.00235596	0.00106728	0.00165763	0.00176462
283	Ig lambda chain V-III region LOI OS=Homo sapiens PE=1 SV=1	LV302_HUMAN	12	4.72	Homo sapiens	0	0	0	0	0	0	0	0	0	2	3	3	2	0	3	0	0	0	0	0	0	0	0	0	0.166667	0.25	0.25	0.166667	0	0.25	0	0	0	0	0	0	0	0	0	0.00221948	0.00353394	0.00320185	0.00221018	0
284	Ig gamma-4 chain C region OS=Homo sapiens GN=IGHG4 PE=1 SV=1	IGHG4_HUMAN	36	7.41	Homo sapiens	17	18	0	0	0	0	0	0	0	20	18	19	19	0	30	0.472222	0.5	0	0	0	0	0	0	0	0.555556	0.5	0.527778	0.527778	0	0.833333	0.00604483	0.00588461	0	0	0	0	0	0	0	0.00739828	0.00706789	0.00675946	0.0069989	0
285	Integrin alpha-2 OS=Homo sapiens GN=ITGA2 PE=1 SV=1	ITA2_HUMAN	129	4.95	Homo sapiens	6	4	5	3	3	3	3	2	3	0	0	0	0	0	0	0.0465116	0.0310078	0.0387597	0.0232558	0.0232558	0.0232558	0.0232558	0.0155039	0.0232558	0	0	0	0	0	0	0.000595387	0.000364937	0.000438383	0.000291748	0.00031481	0.000294386	0.00031802	0.000210734	0.000301273	0	0	0	0	0
286	Syntaxin-11 OS=Homo sapiens GN=STX11 PE=1 SV=1	STX11_HUMAN	33	6.51	Homo sapiens	6	7	5	4	5	3	2	3	5	0	0	0	0	0	0	0.181818	0.212121	0.151515	0.121212	0.151515	0.0909091	0.0606061	0.0909091	0.151515	0	0	0	0	0	0	0.00232742	0.0024965	0.00171368	0.00152063	0.00205103	0.00115078	0.00082878	0.00123567	0.00196284	0	0	0	0	0
287	Endonuclease domain-containing 1 protein OS=Homo sapiens GN=ENDOD1 PE=1 SV=2	ENDD1_HUMAN	55	5.38	Homo sapiens	2	0	0	2	2	3	4	2	5	0	0	0	0	0	0	0.0363636	0	0	0.0363636	0.0363636	0.0545455	0.0727273	0.0363636	0.0909091	0	0	0	0	0	0	0.000465484	0	0	0.000456188	0.000492248	0.000690468	0.000994536	0.000494268	0.0011777	0	0	0	0	0
288	Hepatocyte growth factor activator OS=Homo sapiens GN=HGFAC PE=1 SV=1	HGFA_HUMAN	71	7.24	Homo sapiens	5	5	6	5	9	7	4	5	3	0	0	0	0	0	0	0.0704225	0.0704225	0.084507	0.0704225	0.126761	0.0985915	0.056338	0.0704225	0.0422535	0	0	0	0	0	0	0.000901466	0.000828818	0.000955798	0.000883464	0.00171593	0.00124803	0.000770415	0.000957208	0.000547384	0	0	0	0	0
289	Chloride intracellular channel protein 1 OS=Homo sapiens GN=CLIC1 PE=1 SV=4	CLIC1_HUMAN	27	4.82	Homo sapiens	3	3	2	3	2	0	4	5	3	0	0	0	0	0	0	0.111111	0.111111	0.0740741	0.111111	0.0740741	0	0.148148	0.185185	0.111111	0	0	0	0	0	0	0.00142231	0.00130769	0.000837798	0.00139391	0.00100273	0	0.00202591	0.0025171	0.00143942	0	0	0	0	0
290	Prohibitin-2 OS=Homo sapiens GN=PHB2 PE=1 SV=2	PHB2_HUMAN	33	10.41	Homo sapiens	6	5	4	4	5	5	3	3	4	0	0	0	0	0	0	0.181818	0.151515	0.121212	0.121212	0.151515	0.151515	0.0909091	0.0909091	0.121212	0	0	0	0	0	0	0.00232742	0.00178321	0.00137094	0.00152063	0.00205103	0.00191797	0.00124317	0.00123567	0.00157027	0	0	0	0	0
291	Ig heavy chain V-III region TRO OS=Homo sapiens PE=1 SV=1	HV301_HUMAN	13	10	Homo sapiens	0	0	0	0	0	0	0	0	0	3	0	0	0	3	2	0	0	0	0	0	0	0	0	0	0.230769	0	0	0	0.230769	0.153846	0	0	0	0	0	0	0	0	0	0.00307313	0	0	0	0.00279236
292	Ras-related protein Rab-6B OS=Homo sapiens GN=RAB6B PE=1 SV=1	RAB6B_HUMAN	23	5.14	Homo sapiens	5	6	5	4	4	4	3	5	4	0	0	0	0	0	0	0.217391	0.26087	0.217391	0.173913	0.173913	0.173913	0.130435	0.217391	0.173913	0	0	0	0	0	0	0.00278279	0.00307023	0.00245876	0.00218177	0.00235423	0.00220149	0.00178368	0.00295486	0.002253	0	0	0	0	0
293	B-cell receptor-associated protein 31 OS=Homo sapiens GN=BCAP31 PE=1 SV=3	BAP31_HUMAN	28	8.88	Homo sapiens	3	5	5	3	2	4	3	3	3	0	0	0	0	0	0	0.107143	0.178571	0.178571	0.107143	0.0714286	0.142857	0.107143	0.107143	0.107143	0	0	0	0	0	0	0.00137152	0.00210165	0.00201969	0.00134413	0.000966916	0.00180837	0.00146516	0.00145632	0.00138801	0	0	0	0	0
294	Reticulon-4 OS=Homo sapiens GN=RTN4 PE=1 SV=2	RTN4_HUMAN	130	4.14	Homo sapiens	2	0	3	2	2	2	3	2	2	0	0	0	0	0	0	0.0153846	0	0.0230769	0.0153846	0.0153846	0.0153846	0.0230769	0.0153846	0.0153846	0	0	0	0	0	0	0.000196936	0	0.000261006	0.000193003	0.000208259	0.000194747	0.000315574	0.000209113	0.000199304	0	0	0	0	0
295	Plasma serine protease inhibitor OS=Homo sapiens GN=SERPINA5 PE=1 SV=3	IPSP_HUMAN	46	9.76	Homo sapiens	3	4	4	3	3	4	2	3	4	0	0	0	0	0	0	0.0652174	0.0869565	0.0869565	0.0652174	0.0652174	0.0869565	0.0434783	0.0652174	0.0869565	0	0	0	0	0	0	0.000834836	0.00102341	0.000983502	0.000818164	0.000882836	0.00110075	0.00059456	0.000886458	0.0011265	0	0	0	0	0
296	Leucine-rich alpha-2-glycoprotein OS=Homo sapiens GN=LRG1 PE=1 SV=2	A2GL_HUMAN	38	6.95	Homo sapiens	0	0	2	0	0	0	0	0	0	2	0	2	0	3	4	0	0	0.0526316	0	0	0	0	0	0	0.0526316	0	0.0526316	0	0.0789474	0.105263	0	0	0.000595278	0	0	0	0	0	0	0.00070089	0	0.000674073	0	0.000955281
297	Suprabasin OS=Homo sapiens GN=SBSN PE=1 SV=2	SBSN_HUMAN	61	7.01	Homo sapiens	2	2	2	0	0	0	0	2	2	0	0	0	0	0	0	0.0327869	0.0327869	0.0327869	0	0	0	0	0.0327869	0.0327869	0	0	0	0	0	0	0.000419699	0.000385876	0.000370829	0	0	0	0	0.000445651	0.000424746	0	0	0	0	0
298	Selenoprotein P OS=Homo sapiens GN=SEPP1 PE=1 SV=3	SEPP1_HUMAN	43	7.92	Homo sapiens	0	2	0	0	0	0	0	0	2	0	0	0	0	2	3	0	0.0465116	0	0	0	0	0	0	0.0465116	0	0	0	0	0.0465116	0.0697674	0	0.000547405	0	0	0	0	0	0	0.000602547	0	0	0	0	0.000562801
299	Ig kappa chain V-II region RPMI 6410 OS=Homo sapiens PE=4 SV=1	KV206_HUMAN	15	9.53	Homo sapiens	0	4	3	3	0	3	2	3	2	0	0	0	0	0	0	0	0.266667	0.2	0.2	0	0.2	0.133333	0.2	0.133333	0	0	0	0	0	0	0	0.00313846	0.00226206	0.00250904	0	0.00253172	0.00182332	0.00271847	0.0017273	0	0	0	0	0
300	L-lactate dehydrogenase A chain OS=Homo sapiens GN=LDHA PE=1 SV=2	LDHA_HUMAN	37	8.45	Homo sapiens	3	0	2	0	3	3	3	2	0	0	0	0	0	0	0	0.0810811	0	0.0540541	0	0.0810811	0.0810811	0.0810811	0.0540541	0	0	0	0	0	0	0	0.0010379	0	0.000611366	0	0.00109758	0.00102637	0.00110877	0.000734722	0	0	0	0	0	0
301	Complement factor D OS=Homo sapiens GN=CFD PE=1 SV=5	CFAD_HUMAN	27	7.77	Homo sapiens	0	0	0	0	0	0	2	0	0	0	0	0	0	0	0	0	0	0	0	0	0	0.0740741	0	0	0	0	0	0	0	0	0	0	0	0	0	0	0.00101295	0	0	0	0	0	0	0
302	Alpha-actinin-4 OS=Homo sapiens GN=ACTN4 PE=1 SV=2	ACTN4_HUMAN	105	5.12	Homo sapiens	23	21	22	20	21	22	17	13	14	0	0	0	0	0	0	0.219048	0.2	0.209524	0.190476	0.2	0.209524	0.161905	0.12381	0.133333	0	0	0	0	0	0	0.00280399	0.00235384	0.00236977	0.00238956	0.00270736	0.00265227	0.00221403	0.00168286	0.0017273	0	0	0	0	0
303	Proto-oncogene tyrosine-protein kinase Src OS=Homo sapiens GN=SRC PE=1 SV=3	SRC_HUMAN	60	7.47	Homo sapiens	2	4	3	2	2	0	4	3	2	0	0	0	0	0	0	0.0333333	0.0666667	0.05	0.0333333	0.0333333	0	0.0666667	0.05	0.0333333	0	0	0	0	0	0	0.000426694	0.000784614	0.000565514	0.000418173	0.000451227	0	0.000911658	0.000679618	0.000431825	0	0	0	0	0
304	Cytochrome b-c1 complex subunit 2, mitochondrial OS=Homo sapiens GN=UQCRC2 PE=1 SV=3	QCR2_HUMAN	48	8.92	Homo sapiens	4	5	3	3	0	3	3	4	3	0	0	0	0	0	0	0.0833333	0.104167	0.0625	0.0625	0	0.0625	0.0625	0.0833333	0.0625	0	0	0	0	0	0	0.00106673	0.00122596	0.000706892	0.000784074	0	0.000791161	0.000854679	0.0011327	0.000809672	0	0	0	0	0
305	Heat shock protein HSP 90-alpha OS=Homo sapiens GN=HSP90AA1 PE=1 SV=5	HS90A_HUMAN	85	4.66	Homo sapiens	2	3	4	0	0	0	2	2	2	0	0	0	0	0	0	0.0235294	0.0352941	0.0470588	0	0	0	0.0235294	0.0235294	0.0235294	0	0	0	0	0	0	0.000301196	0.000415384	0.000532248	0	0	0	0.000321762	0.00031982	0.000304818	0	0	0	0	0
306	Glycerol-3-phosphate dehydrogenase, mitochondrial OS=Homo sapiens GN=GPD2 PE=1 SV=3	GPDM_HUMAN	81	7.77	Homo sapiens	3	4	5	3	6	6	2	5	4	0	0	0	0	0	0	0.037037	0.0493827	0.0617284	0.037037	0.0740741	0.0740741	0.0246914	0.0617284	0.0493827	0	0	0	0	0	0	0.000474104	0.000581196	0.000698165	0.000464636	0.00100273	0.000937672	0.000337651	0.000839034	0.000639741	0	0	0	0	0
307	Peroxiredoxin-1 OS=Homo sapiens GN=PRDX1 PE=1 SV=1	PRDX1_HUMAN	22	8.31	Homo sapiens	0	3	2	0	0	0	0	2	2	0	0	0	0	0	0	0	0.136364	0.0909091	0	0	0	0	0.0909091	0.0909091	0	0	0	0	0	0	0	0.00160489	0.00102821	0	0	0	0	0.00123567	0.0011777	0	0	0	0	0
308	Ras-related protein Rab-11A OS=Homo sapiens GN=RAB11A PE=1 SV=3	RB11A_HUMAN (+1)	24	6.53	Homo sapiens	5	4	4	4	4	3	4	3	3	0	0	0	0	0	0	0.208333	0.166667	0.166667	0.166667	0.166667	0.125	0.166667	0.125	0.125	0	0	0	0	0	0	0.00266684	0.00196154	0.00188505	0.00209086	0.00225614	0.00158232	0.00227915	0.00169904	0.00161934	0	0	0	0	0
309	Disintegrin and metalloproteinase domain-containing protein 10 OS=Homo sapiens GN=ADAM10 PE=1 SV=1	ADA10_HUMAN	84	7.81	Homo sapiens	3	3	4	2	4	4	3	2	0	0	0	0	0	0	0	0.0357143	0.0357143	0.047619	0.0238095	0.047619	0.047619	0.0357143	0.0238095	0	0	0	0	0	0	0	0.000457172	0.000420329	0.000538585	0.000298695	0.00064461	0.000602789	0.000488388	0.000323628	0	0	0	0	0	0
310	Dolichyl-diphosphooligosaccharide--protein glycosyltransferase subunit 1 OS=Homo sapiens GN=RPN1 PE=1 SV=1	RPN1_HUMAN	69	6.34	Homo sapiens	0	0	0	3	5	3	0	4	2	0	0	0	0	0	0	0	0	0	0.0434783	0.0724638	0.0434783	0	0.057971	0.0289855	0	0	0	0	0	0	0	0	0	0.000545443	0.000980929	0.000550373	0	0.000787963	0.0003755	0	0	0	0	0
311	Alpha-synuclein OS=Homo sapiens GN=SNCA PE=1 SV=1	SYUA_HUMAN	14	4.37	Homo sapiens	0	2	3	2	0	2	0	3	4	0	0	0	0	0	0	0	0.142857	0.214286	0.142857	0	0.142857	0	0.214286	0.285714	0	0	0	0	0	0	0	0.00168132	0.00242363	0.00179217	0	0.00180837	0	0.00291265	0.00370136	0	0	0	0	0
312	Ig lambda chain V-I region WAH OS=Homo sapiens PE=1 SV=1	LV106_HUMAN	12	6.46	Homo sapiens	0	3	2	0	0	0	2	3	3	0	0	2	0	3	2	0	0.25	0.166667	0	0	0	0.166667	0.25	0.25	0	0	0.166667	0	0.25	0.166667	0	0.0029423	0.00188505	0	0	0	0.00227915	0.00339809	0.00323869	0	0	0.00213457	0	0.00302506
313	Ig lambda chain V-III region SH OS=Homo sapiens PE=1 SV=1	LV301_HUMAN	11	6.5	Homo sapiens	0	0	0	0	0	0	0	0	0	0	2	3	2	3	0	0	0	0	0	0	0	0	0	0	0	0.181818	0.272727	0.181818	0.272727	0	0	0	0	0	0	0	0	0	0	0	0.00257014	0.00349293	0.0024111	0.00330006
314	Alpha-amylase 1 OS=Homo sapiens GN=AMY1A PE=1 SV=2	AMY1_HUMAN	58	6.92	Homo sapiens	0	0	0	0	0	0	0	0	0	0	0	0	0	0	0	0	0	0	0	0	0	0	0	0	0	0	0	0	0	0	0	0	0	0	0	0	0	0	0	0	0	0	0	0
315	Coagulation factor XIII B chain OS=Homo sapiens GN=F13B PE=1 SV=3	F13B_HUMAN	76	6.36	Homo sapiens	0	0	0	0	0	0	0	0	0	0	0	0	0	0	0	0	0	0	0	0	0	0	0	0	0	0	0	0	0	0	0	0	0	0	0	0	0	0	0	0	0	0	0	0
316	Coronin-1A OS=Homo sapiens GN=CORO1A PE=1 SV=4	COR1A_HUMAN	51	6.67	Homo sapiens	3	3	3	3	2	2	2	0	0	0	0	0	0	0	0	0.0588235	0.0588235	0.0588235	0.0588235	0.0392157	0.0392157	0.0392157	0	0	0	0	0	0	0	0	0.000752989	0.000692307	0.00066531	0.000737952	0.000530856	0.000496415	0.000536269	0	0	0	0	0	0	0
317	Myosin regulatory light chain 12A OS=Homo sapiens GN=MYL12A PE=1 SV=2	ML12A_HUMAN	20	4.4	Homo sapiens	6	7	6	6	4	6	4	5	5	0	0	0	0	0	0	0.3	0.35	0.3	0.3	0.2	0.3	0.2	0.25	0.25	0	0	0	0	0	0	0.00384024	0.00411922	0.00339308	0.00376355	0.00270736	0.00379757	0.00273497	0.00339809	0.00323869	0	0	0	0	0
318	ATP synthase subunit O, mitochondrial OS=Homo sapiens GN=ATP5O PE=1 SV=1	ATPO_HUMAN	23	10.61	Homo sapiens	4	3	3	2	0	4	2	4	4	0	0	0	0	0	0	0.173913	0.130435	0.130435	0.0869565	0	0.173913	0.0869565	0.173913	0.173913	0	0	0	0	0	0	0.00222623	0.00153511	0.00147525	0.00109089	0	0.00220149	0.00118912	0.00236389	0.002253	0	0	0	0	0
319	Protein disulfide-isomerase A6 OS=Homo sapiens GN=PDIA6 PE=1 SV=1	PDIA6_HUMAN	48	4.7	Homo sapiens	4	3	5	5	4	4	5	4	5	0	0	0	0	0	0	0.0833333	0.0625	0.104167	0.104167	0.0833333	0.0833333	0.104167	0.0833333	0.104167	0	0	0	0	0	0	0.00106673	0.000735576	0.00117815	0.00130679	0.00112807	0.00105488	0.00142447	0.0011327	0.00134945	0	0	0	0	0
320	Myeloperoxidase OS=Homo sapiens GN=MPO PE=1 SV=1	PERM_HUMAN	84	9.14	Homo sapiens	0	0	0	0	0	0	0	0	0	0	0	0	0	0	0	0	0	0	0	0	0	0	0	0	0	0	0	0	0	0	0	0	0	0	0	0	0	0	0	0	0	0	0	0
321	Catalase OS=Homo sapiens GN=CAT PE=1 SV=3	CATA_HUMAN	60	7.41	Homo sapiens	3	3	3	2	2	2	0	2	2	0	0	0	0	0	0	0.05	0.05	0.05	0.0333333	0.0333333	0.0333333	0	0.0333333	0.0333333	0	0	0	0	0	0	0.000640041	0.000588461	0.000565514	0.000418173	0.000451227	0.000421953	0	0.000453079	0.000431825	0	0	0	0	0
322	14-3-3 protein theta OS=Homo sapiens GN=YWHAQ PE=1 SV=1	1433T_HUMAN	28	4.41	Homo sapiens	4	5	9	3	3	0	4	0	4	0	0	0	0	0	0	0.142857	0.178571	0.321429	0.107143	0.107143	0	0.142857	0	0.142857	0	0	0	0	0	0	0.00182869	0.00210165	0.00363545	0.00134413	0.00145037	0	0.00195355	0	0.00185068	0	0	0	0	0
323	CD59 glycoprotein OS=Homo sapiens GN=CD59 PE=1 SV=1	CD59_HUMAN	14	6.47	Homo sapiens	0	0	0	0	0	0	0	0	0	0	0	0	0	0	0	0	0	0	0	0	0	0	0	0	0	0	0	0	0	0	0	0	0	0	0	0	0	0	0	0	0	0	0	0
324	Voltage-dependent anion-selective channel protein 1 OS=Homo sapiens GN=VDAC1 PE=1 SV=2	VDAC1_HUMAN	31	8.89	Homo sapiens	6	6	6	4	2	3	4	3	0	0	0	0	0	0	0	0.193548	0.193548	0.193548	0.129032	0.0645161	0.0967742	0.129032	0.0967742	0	0	0	0	0	0	0	0.00247758	0.00227791	0.00218909	0.00161873	0.000873343	0.00122502	0.0017645	0.00131539	0	0	0	0	0	0
325	Transitional endoplasmic reticulum ATPase OS=Homo sapiens GN=VCP PE=1 SV=4	TERA_HUMAN	89	4.89	Homo sapiens	4	3	5	4	0	2	2	3	2	0	0	0	0	0	0	0.0449438	0.0337079	0.0561798	0.0449438	0	0.0224719	0.0224719	0.0337079	0.0224719	0	0	0	0	0	0	0.000575317	0.000396715	0.000635409	0.000563828	0	0.000284462	0.0003073	0.000458169	0.000291118	0	0	0	0	0
326	Sex hormone-binding globulin OS=Homo sapiens GN=SHBG PE=1 SV=2	SHBG_HUMAN	44	6.7	Homo sapiens	0	0	0	0	0	0	0	0	0	4	0	0	0	0	4	0	0	0	0	0	0	0	0	0	0.0909091	0	0	0	0	0.0909091	0	0	0	0	0	0	0	0	0	0.00121063	0	0	0	0
327	Calreticulin OS=Homo sapiens GN=CALR PE=1 SV=1	CALR_HUMAN	48	4.04	Homo sapiens	3	4	4	0	0	2	2	2	0	0	0	0	0	0	0	0.0625	0.0833333	0.0833333	0	0	0.0416667	0.0416667	0.0416667	0	0	0	0	0	0	0	0.000800051	0.000980768	0.000942523	0	0	0.000527441	0.000569786	0.000566348	0	0	0	0	0	0
328	Proline-serine-threonine phosphatase-interacting protein 2 OS=Homo sapiens GN=PSTPIP2 PE=1 SV=4	PPIP2_HUMAN	39	8.68	Homo sapiens	3	4	5	0	0	2	2	3	2	0	0	0	0	0	0	0.0769231	0.102564	0.128205	0	0	0.0512821	0.0512821	0.0769231	0.0512821	0	0	0	0	0	0	0.000984678	0.0012071	0.00145004	0	0	0.000649158	0.000701275	0.00104557	0.000664346	0	0	0	0	0
329	Ras-related C3 botulinum toxin substrate 1 OS=Homo sapiens GN=RAC1 PE=1 SV=1	RAC1_HUMAN	21	8.65	Homo sapiens	0	3	3	0	2	2	0	0	2	0	0	0	0	0	0	0	0.142857	0.142857	0	0.0952381	0.0952381	0	0	0.0952381	0	0	0	0	0	0	0	0.00168132	0.00161575	0	0.00128922	0.00120558	0	0	0.00123379	0	0	0	0	0
330	Protein unc-13 homolog D OS=Homo sapiens GN=UNC13D PE=1 SV=1	UN13D_HUMAN	123	6.64	Homo sapiens	0	3	4	4	3	2	4	2	5	0	0	0	0	0	0	0	0.0243902	0.0325203	0.0325203	0.0243902	0.0162602	0.0325203	0.0162602	0.0406504	0	0	0	0	0	0	0	0.000287054	0.000367814	0.000407973	0.000330166	0.000205831	0.000444711	0.000221014	0.000526616	0	0	0	0	0
331	Ras-related protein Rab-1B OS=Homo sapiens GN=RAB1B PE=1 SV=1	RAB1B_HUMAN	22	5.38	Homo sapiens	3	6	4	4	3	3	2	0	4	0	0	0	0	0	0	0.136364	0.272727	0.181818	0.181818	0.136364	0.136364	0.0909091	0	0.181818	0	0	0	0	0	0	0.00174557	0.00320979	0.00205641	0.00228094	0.00184593	0.00172617	0.00124317	0	0.00235541	0	0	0	0	0
332	Ficolin-2 OS=Homo sapiens GN=FCN2 PE=1 SV=2	FCN2_HUMAN	34	6.77	Homo sapiens	0	0	0	0	0	0	0	0	0	5	8	8	6	4	6	0	0	0	0	0	0	0	0	0	0.147059	0.235294	0.235294	0.176471	0.117647	0.176471	0	0	0	0	0	0	0	0	0	0.00195837	0.00332607	0.00301351	0.00234019	0.00142356
333	Glutathione peroxidase 1 OS=Homo sapiens GN=GPX1 PE=1 SV=4	GPX1_HUMAN	22	6.51	Homo sapiens	4	4	4	5	5	4	4	2	4	0	0	0	0	0	0	0.181818	0.181818	0.181818	0.227273	0.227273	0.181818	0.181818	0.0909091	0.181818	0	0	0	0	0	0	0.00232742	0.00213986	0.00205641	0.00285118	0.00307655	0.00230156	0.00248634	0.00123567	0.00235541	0	0	0	0	0
334	Calmodulin-like protein 5 OS=Homo sapiens GN=CALML5 PE=1 SV=2	CALL5_HUMAN	16	4.05	Homo sapiens	0	0	0	0	0	0	2	0	0	0	0	0	0	0	0	0	0	0	0	0	0	0.125	0	0	0	0	0	0	0	0	0	0	0	0	0	0	0.00170936	0	0	0	0	0	0	0
335	Bridging integrator 2 OS=Homo sapiens GN=BIN2 PE=1 SV=3	BIN2_HUMAN	62	4.82	Homo sapiens	0	0	0	0	0	0	0	0	0	0	0	0	0	0	0	0	0	0	0	0	0	0	0	0	0	0	0	0	0	0	0	0	0	0	0	0	0	0	0	0	0	0	0	0
336	Carboxypeptidase N subunit 2 OS=Homo sapiens GN=CPN2 PE=1 SV=3	CPN2_HUMAN	61	5.89	Homo sapiens	0	0	0	2	0	0	0	0	0	2	0	3	4	4	4	0	0	0	0.0327869	0	0	0	0	0	0.0327869	0	0.0491803	0.0655738	0.0655738	0.0655738	0	0	0	0.000411317	0	0	0	0	0	0.00043662	0	0.000629872	0.000869578	0.000793458
337	Prenylcysteine oxidase 1 OS=Homo sapiens GN=PCYOX1 PE=1 SV=3	PCYOX_HUMAN	57	6.1	Homo sapiens	0	0	0	0	0	0	0	0	0	4	3	4	5	7	7	0	0	0	0	0	0	0	0	0	0.0701754	0.0526316	0.0701754	0.0877193	0.122807	0.122807	0	0	0	0	0	0	0	0	0	0.000934519	0.000743988	0.000898765	0.00116325	0.00148599
338	NAD(P) transhydrogenase, mitochondrial OS=Homo sapiens GN=NNT PE=1 SV=3	NNTM_HUMAN	114	8.21	Homo sapiens	3	3	2	2	3	3	2	2	3	0	0	0	0	0	0	0.0263158	0.0263158	0.0175439	0.0175439	0.0263158	0.0263158	0.0175439	0.0175439	0.0263158	0	0	0	0	0	0	0.000336863	0.000309716	0.000198426	0.000220091	0.000356232	0.00033312	0.00023991	0.000238462	0.000340915	0	0	0	0	0
339	Actin-related protein 2/3 complex subunit 2 OS=Homo sapiens GN=ARPC2 PE=1 SV=1	ARPC2_HUMAN	34	7.4	Homo sapiens	0	0	0	0	0	0	0	2	2	0	0	0	0	0	0	0	0	0	0	0	0	0	0.0588235	0.0588235	0	0	0	0	0	0	0	0	0	0	0	0	0	0.00079955	0.000762044	0	0	0	0	0
340	Protein kinase C beta type OS=Homo sapiens GN=PRKCB PE=1 SV=4	KPCB_HUMAN	77	7	Homo sapiens	5	3	4	4	3	4	3	7	6	0	0	0	0	0	0	0.0649351	0.038961	0.0519481	0.0519481	0.038961	0.0519481	0.038961	0.0909091	0.0779221	0	0	0	0	0	0	0.000831222	0.000458541	0.000587547	0.000651698	0.000527408	0.000657588	0.000532787	0.00123567	0.00100946	0	0	0	0	0
341	Prolactin-inducible protein OS=Homo sapiens GN=PIP PE=1 SV=1	PIP_HUMAN	17	8.18	Homo sapiens	0	0	0	0	0	0	0	0	0	0	0	0	0	0	0	0	0	0	0	0	0	0	0	0	0	0	0	0	0	0	0	0	0	0	0	0	0	0	0	0	0	0	0	0
342	Elongation factor 1-alpha 1 OS=Homo sapiens GN=EEF1A1 PE=1 SV=1	EF1A1_HUMAN (+1)	50	9.5	Homo sapiens	3	3	3	0	0	0	0	0	2	0	0	0	0	0	2	0.06	0.06	0.06	0	0	0	0	0	0.04	0	0	0	0	0	0.04	0.000768049	0.000706153	0.000678617	0	0	0	0	0	0.00051819	0	0	0	0	0
343	Insulin-like growth factor-binding protein 3 OS=Homo sapiens GN=IGFBP3 PE=1 SV=2	IBP3_HUMAN	32	8.78	Homo sapiens	0	2	3	2	2	4	0	2	0	0	0	0	0	0	0	0	0.0625	0.09375	0.0625	0.0625	0.125	0	0.0625	0	0	0	0	0	0	0	0	0.000735576	0.00106034	0.000784074	0.000846051	0.00158232	0	0.000849522	0	0	0	0	0	0
344	NADH-cytochrome b5 reductase 3 OS=Homo sapiens GN=CYB5R3 PE=1 SV=3	NB5R3_HUMAN	34	7.68	Homo sapiens	0	3	2	2	0	0	0	0	0	0	0	0	0	0	0	0	0.0882353	0.0588235	0.0588235	0	0	0	0	0	0	0	0	0	0	0	0	0.00103846	0.00066531	0.000737952	0	0	0	0	0	0	0	0	0	0
345	Cytochrome b-c1 complex subunit 1, mitochondrial OS=Homo sapiens GN=UQCRC1 PE=1 SV=3	QCR1_HUMAN	53	6.32	Homo sapiens	4	4	4	4	3	3	4	4	3	0	0	0	0	0	0	0.0754717	0.0754717	0.0754717	0.0754717	0.0566038	0.0566038	0.0754717	0.0754717	0.0566038	0	0	0	0	0	0	0.000966099	0.000888242	0.000853606	0.000946806	0.000766235	0.000716523	0.00103207	0.00102584	0.000733288	0	0	0	0	0
346	Cytoplasmic FMR1-interacting protein 1 OS=Homo sapiens GN=CYFIP1 PE=1 SV=1	CYFP1_HUMAN	145	6.9	Homo sapiens	0	0	2	0	0	2	3	2	3	0	0	0	0	0	0	0	0	0.0137931	0	0	0.0137931	0.0206897	0.0137931	0.0206897	0	0	0	0	0	0	0	0	0.000156004	0	0	0.000174601	0.000282928	0.000187481	0.000268029	0	0	0	0	0
347	Tubulin beta-4B chain OS=Homo sapiens GN=TUBB4B PE=1 SV=1	TBB4B_HUMAN	50	4.52	Homo sapiens	23	25	26	21	20	17	0	19	23	0	0	0	0	0	0	0.46	0.5	0.52	0.42	0.4	0.34	0	0.38	0.46	0	0	0	0	0	0	0.00588837	0.00588461	0.00588134	0.00526898	0.00541473	0.00430392	0	0.0051651	0.00595919	0	0	0	0	0
348	ADP-ribosylation factor 1 OS=Homo sapiens GN=ARF1 PE=1 SV=2	ARF1_HUMAN (+1)	21	6.8	Homo sapiens	2	0	2	0	0	0	0	0	0	0	0	0	0	0	0	0.0952381	0	0.0952381	0	0	0	0	0	0	0	0	0	0	0	0	0.00121912	0	0.00107717	0	0	0	0	0	0	0	0	0	0	0
349	Ras-related protein Rab-7a OS=Homo sapiens GN=RAB7A PE=1 SV=1	RAB7A_HUMAN	23	6.59	Homo sapiens	4	4	5	4	3	3	0	0	0	0	0	0	0	0	0	0.173913	0.173913	0.217391	0.173913	0.130435	0.130435	0	0	0	0	0	0	0	0	0	0.00222623	0.00204682	0.00245876	0.00218177	0.00176567	0.00165112	0	0	0	0	0	0	0	0
350	Nexilin OS=Homo sapiens GN=NEXN PE=1 SV=1	NEXN_HUMAN	81	4.99	Homo sapiens	2	3	3	3	3	4	4	2	3	0	0	0	0	0	0	0.0246914	0.037037	0.037037	0.037037	0.037037	0.0493827	0.0493827	0.0246914	0.037037	0	0	0	0	0	0	0.000316069	0.000435897	0.000418899	0.000464636	0.000501364	0.000625115	0.000675302	0.000335614	0.000479806	0	0	0	0	0
351	Ras-related protein Rab-10 OS=Homo sapiens GN=RAB10 PE=1 SV=1	RAB10_HUMAN	23	8.61	Homo sapiens	0	0	0	3	0	0	0	0	0	0	0	0	0	0	0	0	0	0	0.130435	0	0	0	0	0	0	0	0	0	0	0	0	0	0	0.00163633	0	0	0	0	0	0	0	0	0	0
352	F-actin-capping protein subunit alpha-1 OS=Homo sapiens GN=CAPZA1 PE=1 SV=3	CAZA1_HUMAN	33	5.42	Homo sapiens	3	2	2	2	0	0	0	0	0	0	0	0	0	0	0	0.0909091	0.0606061	0.0606061	0.0606061	0	0	0	0	0	0	0	0	0	0	0	0.00116371	0.000713286	0.000685471	0.000760314	0	0	0	0	0	0	0	0	0	0
353	Phosphate carrier protein, mitochondrial OS=Homo sapiens GN=SLC25A3 PE=1 SV=2	MPCP_HUMAN	40	9.79	Homo sapiens	0	0	0	2	0	0	0	0	0	0	0	0	0	0	0	0	0	0	0.05	0	0	0	0	0	0	0	0	0	0	0	0	0	0	0.000627259	0	0	0	0	0	0	0	0	0	0
354	Transforming growth factor beta-1 OS=Homo sapiens GN=TGFB1 PE=1 SV=2	TGFB1_HUMAN	44	8.63	Homo sapiens	4	5	2	4	4	5	3	3	3	0	0	0	0	0	0	0.0909091	0.113636	0.0454545	0.0909091	0.0909091	0.113636	0.0681818	0.0681818	0.0681818	0	0	0	0	0	0	0.00116371	0.00133741	0.000514104	0.00114047	0.00123062	0.00143847	0.000932378	0.000926752	0.000883279	0	0	0	0	0
355	Protein G6b OS=Homo sapiens GN=G6B PE=1 SV=1	G6B_HUMAN	26	10.08	Homo sapiens	3	0	0	0	0	0	2	2	2	0	0	0	0	0	0	0.115385	0	0	0	0	0	0.0769231	0.0769231	0.0769231	0	0	0	0	0	0	0.00147702	0	0	0	0	0	0.00105191	0.00104557	0.00099652	0	0	0	0	0
356	Elongation factor Tu, mitochondrial OS=Homo sapiens GN=TUFM PE=1 SV=2	EFTU_HUMAN	50	7.68	Homo sapiens	2	3	0	2	0	2	0	0	0	0	0	0	0	0	0	0.04	0.06	0	0.04	0	0.04	0	0	0	0	0	0	0	0	0	0.000512032	0.000706153	0	0.000501807	0	0.000506343	0	0	0	0	0	0	0	0
357	Four and a half LIM domains protein 1 OS=Homo sapiens GN=FHL1 PE=1 SV=4	FHL1_HUMAN	36	9.15	Homo sapiens	2	2	2	0	0	0	0	0	0	0	0	0	0	0	0	0.0555556	0.0555556	0.0555556	0	0	0	0	0	0	0	0	0	0	0	0	0.000711156	0.000653845	0.000628349	0	0	0	0	0	0	0	0	0	0	0
358	Synaptotagmin-like protein 4 OS=Homo sapiens GN=SYTL4 PE=1 SV=2	SYTL4_HUMAN	76	9.42	Homo sapiens	3	3	0	0	0	2	0	2	2	2	0	0	0	0	0	0.0394737	0.0394737	0	0	0	0.0263158	0	0.0263158	0.0263158	0.0263158	0	0	0	0	0	0.000505295	0.000464574	0	0	0	0.00033312	0	0.000357694	0.000340915	0.000350445	0	0	0	0
359	Calmodulin OS=Homo sapiens GN=CALM1 PE=1 SV=2	CALM_HUMAN	17	3.84	Homo sapiens	3	4	4	0	0	0	3	3	0	0	0	0	0	0	0	0.176471	0.235294	0.235294	0	0	0	0.176471	0.176471	0	0	0	0	0	0	0	0.00225897	0.00276923	0.00266124	0	0	0	0.00241321	0.00239865	0	0	0	0	0	0
360	Phosphatidylinositol-glycan-specific phospholipase D OS=Homo sapiens GN=GPLD1 PE=1 SV=3	PHLD_HUMAN	92	6.33	Homo sapiens	0	0	0	0	0	0	0	0	0	0	2	2	2	2	4	0	0	0	0	0	0	0	0	0	0	0.0217391	0.0217391	0.0217391	0.0217391	0.0434783	0	0	0	0	0	0	0	0	0	0	0.0003073	0.000278422	0.000288284	0.000263048
361	Calpain-1 catalytic subunit OS=Homo sapiens GN=CAPN1 PE=1 SV=1	CAN1_HUMAN	82	5.35	Homo sapiens	4	4	6	4	4	6	2	3	3	0	0	0	0	0	0	0.0487805	0.0487805	0.0731707	0.0487805	0.0487805	0.0731707	0.0243902	0.0365854	0.0365854	0	0	0	0	0	0	0.00062443	0.000574108	0.000827581	0.00061196	0.000660333	0.000926237	0.000333533	0.000497281	0.000473954	0	0	0	0	0
362	Keratinocyte proline-rich protein OS=Homo sapiens GN=KPRP PE=1 SV=1	KPRP_HUMAN	64	8.29	Homo sapiens	0	0	0	0	0	0	0	0	0	0	0	0	0	2	0	0	0	0	0	0	0	0	0	0	0	0	0	0	0.03125	0	0	0	0	0	0	0	0	0	0	0	0	0	0	0.000378132
363	Cell division control protein 42 homolog OS=Homo sapiens GN=CDC42 PE=1 SV=2	CDC42_HUMAN	21	6.51	Homo sapiens	0	3	0	3	0	0	0	0	4	0	0	0	0	0	0	0	0.142857	0	0.142857	0	0	0	0	0.190476	0	0	0	0	0	0	0	0.00168132	0	0.00179217	0	0	0	0	0.00246757	0	0	0	0	0
364	Synaptosomal-associated protein 23 OS=Homo sapiens GN=SNAP23 PE=1 SV=1	SNP23_HUMAN	23	4.62	Homo sapiens	2	0	2	0	2	0	2	2	2	0	0	0	0	0	0	0.0869565	0	0.0869565	0	0.0869565	0	0.0869565	0.0869565	0.0869565	0	0	0	0	0	0	0.00111311	0	0.000983502	0	0.00117711	0	0.00118912	0.00118194	0.0011265	0	0	0	0	0
365	10 kDa heat shock protein, mitochondrial OS=Homo sapiens GN=HSPE1 PE=1 SV=2	CH10_HUMAN	11	9.49	Homo sapiens	0	0	0	0	0	0	0	0	0	0	0	0	0	0	0	0	0	0	0	0	0	0	0	0	0	0	0	0	0	0	0	0	0	0	0	0	0	0	0	0	0	0	0	0
366	Carnitine O-palmitoyltransferase 1, liver isoform OS=Homo sapiens GN=CPT1A PE=1 SV=2	CPT1A_HUMAN	88	8.84	Homo sapiens	2	2	5	3	4	3	3	2	3	0	0	0	0	0	0	0.0227273	0.0227273	0.0568182	0.0340909	0.0454545	0.0340909	0.0340909	0.0227273	0.0340909	0	0	0	0	0	0	0.000290928	0.000267482	0.000642629	0.000427677	0.00061531	0.000431542	0.000466189	0.000308917	0.000441639	0	0	0	0	0
367	Thioredoxin-dependent peroxide reductase, mitochondrial OS=Homo sapiens GN=PRDX3 PE=1 SV=3	PRDX3_HUMAN	28	7.88	Homo sapiens	0	3	2	2	0	0	2	2	2	0	0	0	0	0	0	0	0.107143	0.0714286	0.0714286	0	0	0.0714286	0.0714286	0.0714286	0	0	0	0	0	0	0	0.00126099	0.000807877	0.000896085	0	0	0.000976777	0.000970883	0.00092534	0	0	0	0	0
368	Peroxiredoxin-6 OS=Homo sapiens GN=PRDX6 PE=1 SV=3	PRDX6_HUMAN	25	6.29	Homo sapiens	0	0	3	3	4	4	0	0	0	0	0	0	0	2	2	0	0	0.12	0.12	0.16	0.16	0	0	0	0	0	0	0	0.08	0.08	0	0	0.00135723	0.00150542	0.00216589	0.00202537	0	0	0	0	0	0	0	0.000968018
369	Extracellular matrix protein 1 OS=Homo sapiens GN=ECM1 PE=1 SV=2	ECM1_HUMAN	61	6.7	Homo sapiens	0	0	0	0	0	0	0	0	0	0	0	0	2	0	2	0	0	0	0	0	0	0	0	0	0	0	0	0.0327869	0	0.0327869	0	0	0	0	0	0	0	0	0	0	0	0	0.000434789	0
370	Fetuin-B OS=Homo sapiens GN=FETUB PE=1 SV=2	FETUB_HUMAN	42	6.83	Homo sapiens	0	0	0	0	0	0	2	0	0	2	3	5	4	5	4	0	0	0	0	0	0	0.047619	0	0	0.047619	0.0714286	0.119048	0.0952381	0.119048	0.0952381	0	0	0	0	0	0	0.000651184	0	0	0.000634138	0.0010097	0.00152469	0.00126296	0.0014405
371	Guanine nucleotide-binding protein G(I)/G(S)/G(O) subunit gamma-5 OS=Homo sapiens GN=GNG5 PE=1 SV=3	GBG5_HUMAN	7	10.62	Homo sapiens	2	2	2	2	0	2	0	0	0	0	0	0	0	0	0	0.285714	0.285714	0.285714	0.285714	0	0.285714	0	0	0	0	0	0	0	0	0	0.00365737	0.00336263	0.00323151	0.00358434	0	0.00361674	0	0	0	0	0	0	0	0
372	C-reactive protein OS=Homo sapiens GN=CRP PE=1 SV=1	CRP_HUMAN	25	5.32	Homo sapiens	0	0	0	0	0	0	2	0	0	0	0	0	0	0	0	0	0	0	0	0	0	0.08	0	0	0	0	0	0	0	0	0	0	0	0	0	0	0.00109399	0	0	0	0	0	0	0
373	Adipocyte plasma membrane-associated protein OS=Homo sapiens GN=APMAP PE=1 SV=2	APMAP_HUMAN	46	6.02	Homo sapiens	0	0	0	0	0	0	0	0	0	0	0	0	0	0	0	0	0	0	0	0	0	0	0	0	0	0	0	0	0	0	0	0	0	0	0	0	0	0	0	0	0	0	0	0
374	Malectin OS=Homo sapiens GN=MLEC PE=1 SV=1	MLEC_HUMAN	32	5.09	Homo sapiens	3	3	4	3	4	0	0	0	3	0	0	0	0	0	0	0.09375	0.09375	0.125	0.09375	0.125	0	0	0	0.09375	0	0	0	0	0	0	0.00120008	0.00110336	0.00141378	0.00117611	0.0016921	0	0	0	0.00121451	0	0	0	0	0
375	Actin-related protein 2/3 complex subunit 4 OS=Homo sapiens GN=ARPC4 PE=1 SV=3	ARPC4_HUMAN	20	8.71	Homo sapiens	2	2	0	2	2	0	2	0	0	0	0	0	0	0	0	0.1	0.1	0	0.1	0.1	0	0.1	0	0	0	0	0	0	0	0	0.00128008	0.00117692	0	0.00125452	0.00135368	0	0.00136749	0	0	0	0	0	0	0
376	Rho-associated protein kinase 2 OS=Homo sapiens GN=ROCK2 PE=1 SV=4	ROCK2_HUMAN	161	5.84	Homo sapiens	3	4	3	2	3	2	2	3	0	0	0	0	0	0	0	0.0186335	0.0248447	0.0186335	0.0124224	0.0186335	0.0124224	0.0124224	0.0186335	0	0	0	0	0	0	0	0.000238524	0.000292403	0.000210751	0.000155841	0.000252239	0.000157249	0.000169874	0.000253274	0	0	0	0	0	0
377	Desmocollin-1 OS=Homo sapiens GN=DSC1 PE=1 SV=2	DSC1_HUMAN	100	5.08	Homo sapiens	0	0	0	0	0	0	0	0	0	0	0	2	0	0	0	0	0	0	0	0	0	0	0	0	0	0	0.02	0	0	0	0	0	0	0	0	0	0	0	0	0	0	0.000256148	0	0
378	Ig lambda chain V-IV region Hil OS=Homo sapiens PE=1 SV=1	LV403_HUMAN	12	6.45	Homo sapiens	0	0	0	0	0	0	0	0	0	0	0	2	2	0	0	0	0	0	0	0	0	0	0	0	0	0	0.166667	0.166667	0	0	0	0	0	0	0	0	0	0	0	0	0	0.00213457	0.00221018	0
379	Electron transfer flavoprotein subunit alpha, mitochondrial OS=Homo sapiens GN=ETFA PE=1 SV=1	ETFA_HUMAN	35	8.57	Homo sapiens	3	2	5	4	2	4	5	5	4	0	0	0	0	0	0	0.0857143	0.0571429	0.142857	0.114286	0.0571429	0.114286	0.142857	0.142857	0.114286	0	0	0	0	0	0	0.00109721	0.000672526	0.00161575	0.00143374	0.000773532	0.00144669	0.00195355	0.00194177	0.00148054	0	0	0	0	0
380	Stromal interaction molecule 1 OS=Homo sapiens GN=STIM1 PE=1 SV=3	STIM1_HUMAN	77	6.65	Homo sapiens	0	0	0	0	2	0	0	3	0	0	0	0	0	0	0	0	0	0	0	0.025974	0	0	0.038961	0	0	0	0	0	0	0	0	0	0	0	0.000351606	0	0	0.000529572	0	0	0	0	0	0
381	Annexin A2 OS=Homo sapiens GN=ANXA2 PE=1 SV=2	ANXA2_HUMAN	39	7.91	Homo sapiens	2	2	0	2	0	0	0	0	0	2	2	0	0	0	0	0.0512821	0.0512821	0	0.0512821	0	0	0	0	0	0.0512821	0.0512821	0	0	0	0	0.000656452	0.000603549	0	0.000643343	0	0	0	0	0	0.000682918	0.000724912	0	0	0
382	Coagulation factor VIII OS=Homo sapiens GN=F8 PE=1 SV=1	FA8_HUMAN	267	7.37	Homo sapiens	0	0	0	0	0	0	0	0	0	0	0	0	0	0	0	0	0	0	0	0	0	0	0	0	0	0	0	0	0	0	0	0	0	0	0	0	0	0	0	0	0	0	0	0
383	Tropomodulin-3 OS=Homo sapiens GN=TMOD3 PE=1 SV=1	TMOD3_HUMAN	40	4.83	Homo sapiens	3	2	2	2	2	0	0	4	4	0	0	0	0	0	0	0.075	0.05	0.05	0.05	0.05	0	0	0.1	0.1	0	0	0	0	0	0	0.000960061	0.000588461	0.000565514	0.000627259	0.000676841	0	0	0.00135924	0.00129548	0	0	0	0	0
384	Cysteine and glycine-rich protein 1 OS=Homo sapiens GN=CSRP1 PE=1 SV=3	CSRP1_HUMAN	21	8.68	Homo sapiens	2	3	2	3	2	4	4	3	4	0	0	0	0	0	0	0.0952381	0.142857	0.0952381	0.142857	0.0952381	0.190476	0.190476	0.142857	0.190476	0	0	0	0	0	0	0.00121912	0.00168132	0.00107717	0.00179217	0.00128922	0.00241116	0.00260474	0.00194177	0.00246757	0	0	0	0	0
385	Trifunctional enzyme subunit beta, mitochondrial OS=Homo sapiens GN=HADHB PE=1 SV=3	ECHB_HUMAN	51	9.94	Homo sapiens	4	4	2	2	4	3	2	3	2	0	0	0	0	0	0	0.0784314	0.0784314	0.0392157	0.0392157	0.0784314	0.0588235	0.0392157	0.0588235	0.0392157	0	0	0	0	0	0	0.00100399	0.000923076	0.00044354	0.000491968	0.00106171	0.000744622	0.000536269	0.00079955	0.00050803	0	0	0	0	0
386	Actin-related protein 2/3 complex subunit 3 OS=Homo sapiens GN=ARPC3 PE=1 SV=3	ARPC3_HUMAN	21	8.83	Homo sapiens	0	2	2	2	0	0	0	0	0	0	0	0	0	0	0	0	0.0952381	0.0952381	0.0952381	0	0	0	0	0	0	0	0	0	0	0	0	0.00112088	0.00107717	0.00119478	0	0	0	0	0	0	0	0	0	0
387	Delta(3,5)-Delta(2,4)-dienoyl-CoA isomerase, mitochondrial OS=Homo sapiens GN=ECH1 PE=1 SV=2	ECH1_HUMAN	36	8.12	Homo sapiens	0	2	2	3	0	3	4	2	2	0	0	0	0	0	0	0	0.0555556	0.0555556	0.0833333	0	0.0833333	0.111111	0.0555556	0.0555556	0	0	0	0	0	0	0	0.000653845	0.000628349	0.00104543	0	0.00105488	0.00151943	0.000755131	0.000719709	0	0	0	0	0
388	Secreted phosphoprotein 24 OS=Homo sapiens GN=SPP2 PE=1 SV=1	SPP24_HUMAN	24	8.46	Homo sapiens	0	0	0	0	0	0	0	0	0	3	3	0	0	0	0	0	0	0	0	0	0	0	0	0	0.125	0.125	0	0	0	0	0	0	0	0	0	0	0	0	0	0.00166461	0.00176697	0	0	0
389	Flotillin-1 OS=Homo sapiens GN=FLOT1 PE=1 SV=3	FLOT1_HUMAN	47	7.58	Homo sapiens	2	2	3	0	0	0	2	2	0	0	0	0	0	0	0	0.0425532	0.0425532	0.0638298	0	0	0	0.0425532	0.0425532	0	0	0	0	0	0	0	0.000544715	0.000500818	0.000721933	0	0	0	0.000581909	0.000578398	0	0	0	0	0	0
390	Ig kappa chain V-I region HK102 (Fragment) OS=Homo sapiens GN=IGKV1-5 PE=4 SV=1	KV110_HUMAN	13	8.46	Homo sapiens	0	0	3	0	3	2	0	0	3	0	0	0	0	0	0	0	0	0.230769	0	0.230769	0.153846	0	0	0.230769	0	0	0	0	0	0	0	0	0.00261006	0	0.00312388	0.00194747	0	0	0.00298956	0	0	0	0	0
391	Heparanase OS=Homo sapiens GN=HPSE PE=1 SV=2	HPSE_HUMAN	61	9.71	Homo sapiens	2	3	3	2	0	0	3	2	0	0	0	0	0	0	0	0.0327869	0.0491803	0.0491803	0.0327869	0	0	0.0491803	0.0327869	0	0	0	0	0	0	0	0.000419699	0.000578814	0.000556243	0.000411317	0	0	0.000672535	0.000445651	0	0	0	0	0	0
392	Trem-like transcript 1 protein OS=Homo sapiens GN=TREML1 PE=1 SV=2	TRML1_HUMAN	33	5.95	Homo sapiens	3	4	2	0	3	0	0	0	0	0	0	0	0	0	0	0.0909091	0.121212	0.0606061	0	0.0909091	0	0	0	0	0	0	0	0	0	0	0.00116371	0.00142657	0.000685471	0	0.00123062	0	0	0	0	0	0	0	0	0
393	Kinesin-like protein KIF2A OS=Homo sapiens GN=KIF2A PE=1 SV=3	KIF2A_HUMAN	80	6.66	Homo sapiens	2	2	0	2	0	2	2	4	3	0	0	0	0	0	0	0.025	0.025	0	0.025	0	0.025	0.025	0.05	0.0375	0	0	0	0	0	0	0.00032002	0.00029423	0	0.00031363	0	0.000316464	0.000341872	0.000679618	0.000485803	0	0	0	0	0
394	Polymeric immunoglobulin receptor OS=Homo sapiens GN=PIGR PE=1 SV=4	PIGR_HUMAN	83	5.43	Homo sapiens	0	0	0	0	0	0	0	0	0	0	0	0	0	0	0	0	0	0	0	0	0	0	0	0	0	0	0	0	0	0	0	0	0	0	0	0	0	0	0	0	0	0	0	0
395	Drebrin OS=Homo sapiens GN=DBN1 PE=1 SV=4	DREB_HUMAN	71	4.1	Homo sapiens	0	0	3	0	0	0	0	0	0	0	0	0	0	0	0	0	0	0.0422535	0	0	0	0	0	0	0	0	0	0	0	0	0	0	0.000477899	0	0	0	0	0	0	0	0	0	0	0
396	Poly(rC)-binding protein 1 OS=Homo sapiens GN=PCBP1 PE=1 SV=2	PCBP1_HUMAN	37	7.11	Homo sapiens	0	2	2	2	2	0	2	0	0	0	0	0	0	0	0	0	0.0540541	0.0540541	0.0540541	0.0540541	0	0.0540541	0	0	0	0	0	0	0	0	0	0.000636174	0.000611366	0.000678118	0.00073172	0	0.000739182	0	0	0	0	0	0	0
397	14-3-3 protein beta/alpha OS=Homo sapiens GN=YWHAB PE=1 SV=3	1433B_HUMAN	28	4.47	Homo sapiens	6	5	6	4	4	0	0	5	7	0	0	0	0	0	0	0.214286	0.178571	0.214286	0.142857	0.142857	0	0	0.178571	0.25	0	0	0	0	0	0	0.00274303	0.00210165	0.00242363	0.00179217	0.00193383	0	0	0.00242721	0.00323869	0	0	0	0	0
398	Extended synaptotagmin-1 OS=Homo sapiens GN=ESYT1 PE=1 SV=1	ESYT1_HUMAN	123	5.61	Homo sapiens	0	0	2	2	3	4	0	0	2	0	0	0	0	0	0	0	0	0.0162602	0.0162602	0.0243902	0.0325203	0	0	0.0162602	0	0	0	0	0	0	0	0	0.000183907	0.000203987	0.000330166	0.000411661	0	0	0.000210646	0	0	0	0	0
399	ATP synthase F(0) complex subunit B1, mitochondrial OS=Homo sapiens GN=ATP5F1 PE=1 SV=2	AT5F1_HUMAN	29	9.79	Homo sapiens	0	0	0	2	0	2	2	0	0	0	0	0	0	0	0	0	0	0	0.0689655	0	0.0689655	0.0689655	0	0	0	0	0	0	0	0	0	0	0	0.000865185	0	0.000873005	0.000943095	0	0	0	0	0	0	0
400	Heat shock 70 kDa protein 1A/1B OS=Homo sapiens GN=HSPA1A PE=1 SV=5	HSP71_HUMAN	70	5.47	Homo sapiens	0	3	4	5	0	0	5	6	5	0	0	0	0	0	0	0	0.0428571	0.0571429	0.0714286	0	0	0.0714286	0.0857143	0.0714286	0	0	0	0	0	0	0	0.000504395	0.000646302	0.000896085	0	0	0.000976777	0.00116506	0.00092534	0	0	0	0	0
401	Ig kappa chain V-III region CLL OS=Homo sapiens PE=4 SV=2	KV308_HUMAN	14	8.7	Homo sapiens	0	0	0	0	0	0	0	0	0	0	0	2	0	0	0	0	0	0	0	0	0	0	0	0	0	0	0.142857	0	0	0	0	0	0	0	0	0	0	0	0	0	0	0.00182963	0	0
402	Beta-2-microglobulin OS=Homo sapiens GN=B2M PE=1 SV=1	B2MG_HUMAN	14	6.51	Homo sapiens	0	2	2	0	2	0	2	2	0	0	0	0	0	0	0	0	0.142857	0.142857	0	0.142857	0	0.142857	0.142857	0	0	0	0	0	0	0	0	0.00168132	0.00161575	0	0.00193383	0	0.00195355	0.00194177	0	0	0	0	0	0
403	Protein S100-A4 OS=Homo sapiens GN=S100A4 PE=1 SV=1	S10A4_HUMAN	12	5.92	Homo sapiens	0	0	0	3	3	3	3	0	0	0	0	0	0	0	0	0	0	0	0.25	0.25	0.25	0.25	0	0	0	0	0	0	0	0	0	0	0	0.0031363	0.0033842	0.00316464	0.00341872	0	0	0	0	0	0	0
404	Trifunctional enzyme subunit alpha, mitochondrial OS=Homo sapiens GN=HADHA PE=1 SV=2	ECHA_HUMAN	83	9.52	Homo sapiens	0	3	2	0	2	2	3	0	0	0	0	0	0	0	0	0	0.0361446	0.0240964	0	0.0240964	0.0240964	0.0361446	0	0	0	0	0	0	0	0	0	0.000425393	0.000272537	0	0.000326188	0.000305026	0.000494272	0	0	0	0	0	0	0
405	Keratin, type II cuticular Hb5 OS=Homo sapiens GN=KRT85 PE=1 SV=1	KRT85_HUMAN	56	6.49	Homo sapiens	0	0	0	0	0	0	0	0	0	0	0	0	0	0	0	0	0	0	0	0	0	0	0	0	0	0	0	0	0	0	0	0	0	0	0	0	0	0	0	0	0	0	0	0
406	Arachidonate 12-lipoxygenase, 12S-type OS=Homo sapiens GN=ALOX12 PE=1 SV=4	LOX12_HUMAN	76	6.15	Homo sapiens	2	4	4	2	0	2	2	0	0	0	0	0	0	0	0	0.0263158	0.0526316	0.0526316	0.0263158	0	0.0263158	0.0263158	0	0	0	0	0	0	0	0	0.000336863	0.000619432	0.000595278	0.000330136	0	0.00033312	0.000359865	0	0	0	0	0	0	0
407	Protein diaphanous homolog 1 OS=Homo sapiens GN=DIAPH1 PE=1 SV=2	DIAP1_HUMAN	141	5.07	Homo sapiens	3	3	3	3	2	3	2	2	0	0	0	0	0	0	0	0.0212766	0.0212766	0.0212766	0.0212766	0.0141844	0.0212766	0.0141844	0.0141844	0	0	0	0	0	0	0	0.000272358	0.000250409	0.000240644	0.000266919	0.000192012	0.000269331	0.00019397	0.000192799	0	0	0	0	0	0
408	Keratin, type II cytoskeletal 78 OS=Homo sapiens GN=KRT78 PE=2 SV=2	K2C78_HUMAN	57	5.83	Homo sapiens	0	0	0	0	0	0	0	0	0	0	5	0	0	0	0	0	0	0	0	0	0	0	0	0	0	0.0877193	0	0	0	0	0	0	0	0	0	0	0	0	0	0	0.00123998	0	0	0
409	Histone H3.2 OS=Homo sapiens GN=HIST2H3A PE=1 SV=3	H32_HUMAN	15	11.83	Homo sapiens	0	0	0	0	0	0	0	0	0	0	0	0	0	0	0	0	0	0	0	0	0	0	0	0	0	0	0	0	0	0	0	0	0	0	0	0	0	0	0	0	0	0	0	0
410	Microtubule-associated protein RP/EB family member 2 OS=Homo sapiens GN=MAPRE2 PE=1 SV=1	MARE2_HUMAN	37	5.28	Homo sapiens	2	2	2	0	0	0	0	2	2	0	0	0	0	0	0	0.0540541	0.0540541	0.0540541	0	0	0	0	0.0540541	0.0540541	0	0	0	0	0	0	0.000691936	0.000636174	0.000611366	0	0	0	0	0.000734722	0.000700257	0	0	0	0	0
411	Dihydrolipoyl dehydrogenase, mitochondrial OS=Homo sapiens GN=DLD PE=1 SV=2	DLDH_HUMAN	54	7.95	Homo sapiens	0	0	0	2	0	2	0	3	3	0	0	0	0	0	0	0	0	0	0.037037	0	0.037037	0	0.0555556	0.0555556	0	0	0	0	0	0	0	0	0	0.000464636	0	0.000468836	0	0.000755131	0.000719709	0	0	0	0	0
412	Ig heavy chain V-II region ARH-77 OS=Homo sapiens PE=4 SV=1	HV209_HUMAN	16	8.45	Homo sapiens	0	0	0	0	0	0	0	0	0	2	2	2	0	2	2	0	0	0	0	0	0	0	0	0	0.125	0.125	0.125	0	0.125	0.125	0	0	0	0	0	0	0	0	0	0.00166461	0.00176697	0.00160092	0	0.00151253
413	Tubulin alpha-8 chain OS=Homo sapiens GN=TUBA8 PE=1 SV=1	TBA8_HUMAN	50	4.7	Homo sapiens	11	11	14	14	11	0	12	10	0	0	0	0	0	0	0	0.22	0.22	0.28	0.28	0.22	0	0.24	0.2	0	0	0	0	0	0	0	0.00281618	0.00258923	0.00316688	0.00351265	0.0029781	0	0.00328197	0.00271847	0	0	0	0	0	0
414	C-C motif chemokine 5 OS=Homo sapiens GN=CCL5 PE=1 SV=3	CCL5_HUMAN	10	9.29	Homo sapiens	0	2	3	2	2	3	0	0	0	0	0	0	0	0	0	0	0.2	0.3	0.2	0.2	0.3	0	0	0	0	0	0	0	0	0	0	0.00235384	0.00339308	0.00250904	0.00270736	0.00379757	0	0	0	0	0	0	0	0
415	Cytochrome b-245 heavy chain OS=Homo sapiens GN=CYBB PE=1 SV=2	CY24B_HUMAN	65	8.76	Homo sapiens	0	0	0	0	0	0	0	0	0	0	0	0	0	0	0	0	0	0	0	0	0	0	0	0	0	0	0	0	0	0	0	0	0	0	0	0	0	0	0	0	0	0	0	0
416	Aminopeptidase N OS=Homo sapiens GN=ANPEP PE=1 SV=4	AMPN_HUMAN	110	5.14	Homo sapiens	0	0	0	0	0	0	0	0	0	0	0	0	0	0	0	0	0	0	0	0	0	0	0	0	0	0	0	0	0	0	0	0	0	0	0	0	0	0	0	0	0	0	0	0
417	Golgi-associated plant pathogenesis-related protein 1 OS=Homo sapiens GN=GLIPR2 PE=1 SV=3	GAPR1_HUMAN	17	9.92	Homo sapiens	2	0	0	0	3	2	0	0	2	0	0	0	0	0	0	0.117647	0	0	0	0.176471	0.117647	0	0	0.117647	0	0	0	0	0	0	0.00150598	0	0	0	0.00238885	0.00148924	0	0	0.00152409	0	0	0	0	0
418	Peptidyl-prolyl cis-trans isomerase B OS=Homo sapiens GN=PPIB PE=1 SV=2	PPIB_HUMAN	24	10.07	Homo sapiens	0	0	0	0	2	2	2	0	0	0	0	0	0	0	0	0	0	0	0	0.0833333	0.0833333	0.0833333	0	0	0	0	0	0	0	0	0	0	0	0	0.00112807	0.00105488	0.00113957	0	0	0	0	0	0	0
419	Leukocyte elastase inhibitor OS=Homo sapiens GN=SERPINB1 PE=1 SV=1	ILEU_HUMAN	43	6.19	Homo sapiens	5	5	5	4	4	2	3	3	2	0	0	0	0	0	0	0.116279	0.116279	0.116279	0.0930233	0.0930233	0.0465116	0.0697674	0.0697674	0.0465116	0	0	0	0	0	0	0.00148847	0.00136851	0.00131515	0.00116699	0.00125924	0.000588771	0.000954061	0.000948304	0.000602547	0	0	0	0	0
420	Collagen alpha-3(VI) chain OS=Homo sapiens GN=COL6A3 PE=1 SV=5	CO6A3_HUMAN	344	6.65	Homo sapiens	0	0	0	0	0	0	0	0	0	0	0	0	0	0	0	0	0	0	0	0	0	0	0	0	0	0	0	0	0	0	0	0	0	0	0	0	0	0	0	0	0	0	0	0
421	Vesicle-associated membrane protein 8 OS=Homo sapiens GN=VAMP8 PE=1 SV=1	VAMP8_HUMAN	11	7.53	Homo sapiens	2	0	0	0	3	2	2	0	0	0	0	0	0	0	0	0.181818	0	0	0	0.272727	0.181818	0.181818	0	0	0	0	0	0	0	0	0.00232742	0	0	0	0.00369186	0.00230156	0.00248634	0	0	0	0	0	0	0
422	Calpain small subunit 1 OS=Homo sapiens GN=CAPNS1 PE=1 SV=1	CPNS1_HUMAN	28	4.82	Homo sapiens	3	3	3	0	0	0	0	2	2	0	0	0	0	0	0	0.107143	0.107143	0.107143	0	0	0	0	0.0714286	0.0714286	0	0	0	0	0	0	0.00137152	0.00126099	0.00121182	0	0	0	0	0.000970883	0.00092534	0	0	0	0	0
423	Ig kappa chain V-III region VG (Fragment) OS=Homo sapiens PE=1 SV=1	KV309_HUMAN	13	4.59	Homo sapiens	0	0	0	0	0	0	0	0	0	0	0	0	0	2	0	0	0	0	0	0	0	0	0	0	0	0	0	0	0.153846	0	0	0	0	0	0	0	0	0	0	0	0	0	0	0.00186157
424	Ig lambda chain V region 4A OS=Homo sapiens PE=4 SV=1	LV001_HUMAN	12	7.12	Homo sapiens	2	0	0	0	0	0	0	2	2	0	0	0	0	0	0	0.166667	0	0	0	0	0	0	0.166667	0.166667	0	0	0	0	0	0	0.00213347	0	0	0	0	0	0	0.00226539	0.00215913	0	0	0	0	0
425	Glutathione S-transferase kappa 1 OS=Homo sapiens GN=GSTK1 PE=1 SV=3	GSTK1_HUMAN	25	8.69	Homo sapiens	3	2	2	2	2	3	0	3	3	0	0	0	0	0	0	0.12	0.08	0.08	0.08	0.08	0.12	0	0.12	0.12	0	0	0	0	0	0	0.0015361	0.000941537	0.000904822	0.00100361	0.00108295	0.00151903	0	0.00163108	0.00155457	0	0	0	0	0
426	Tropomyosin beta chain OS=Homo sapiens GN=TPM2 PE=1 SV=1	TPM2_HUMAN	33	4.36	Homo sapiens	11	0	11	0	0	0	0	10	0	0	0	0	0	0	0	0.333333	0	0.333333	0	0	0	0	0.30303	0	0	0	0	0	0	0	0.00426694	0	0.00377009	0	0	0	0	0.0041189	0	0	0	0	0	0
427	Protein S100-A7 OS=Homo sapiens GN=S100A7 PE=1 SV=4	S10A7_HUMAN	11	6.78	Homo sapiens	0	0	0	0	0	0	0	0	0	0	0	0	0	0	0	0	0	0	0	0	0	0	0	0	0	0	0	0	0	0	0	0	0	0	0	0	0	0	0	0	0	0	0	0
428	Ras-related protein Rab-8A OS=Homo sapiens GN=RAB8A PE=1 SV=1	RAB8A_HUMAN	24	9.54	Homo sapiens	0	0	4	4	0	4	0	4	0	0	0	0	0	0	0	0	0	0.166667	0.166667	0	0.166667	0	0.166667	0	0	0	0	0	0	0	0	0	0.00188505	0.00209086	0	0.00210976	0	0.00226539	0	0	0	0	0	0
429	Heat shock protein beta-1 OS=Homo sapiens GN=HSPB1 PE=1 SV=2	HSPB1_HUMAN	23	6.36	Homo sapiens	0	3	0	0	0	2	0	0	2	0	0	0	0	0	0	0	0.130435	0	0	0	0.0869565	0	0	0.0869565	0	0	0	0	0	0	0	0.00153511	0	0	0	0.00110075	0	0	0.0011265	0	0	0	0	0
430	Keratin, type II cytoskeletal 73 OS=Homo sapiens GN=KRT73 PE=1 SV=1	K2C73_HUMAN	59	7.26	Homo sapiens	0	0	4	0	0	0	0	0	0	0	0	0	0	0	0	0	0	0.0677966	0	0	0	0	0	0	0	0	0	0	0	0	0	0	0.000766798	0	0	0	0	0	0	0	0	0	0	0
431	Ig heavy chain V-III region WEA OS=Homo sapiens PE=1 SV=1	HV302_HUMAN	12	8.7	Homo sapiens	0	0	0	0	0	0	0	0	0	5	4	4	0	6	6	0	0	0	0	0	0	0	0	0	0.416667	0.333333	0.333333	0	0.5	0.5	0	0	0	0	0	0	0	0	0	0.00554871	0.00471193	0.00426913	0	0.00605011
432	Cytochrome c oxidase subunit 5A, mitochondrial OS=Homo sapiens GN=COX5A PE=1 SV=2	COX5A_HUMAN	17	6.78	Homo sapiens	3	2	3	0	0	0	0	2	2	0	0	0	0	0	0	0.176471	0.117647	0.176471	0	0	0	0	0.117647	0.117647	0	0	0	0	0	0	0.00225897	0.00138461	0.00199593	0	0	0	0	0.0015991	0.00152409	0	0	0	0	0
433	Annexin A3 OS=Homo sapiens GN=ANXA3 PE=1 SV=3	ANXA3_HUMAN	36	5.71	Homo sapiens	0	0	0	0	0	0	0	0	0	0	0	0	0	0	0	0	0	0	0	0	0	0	0	0	0	0	0	0	0	0	0	0	0	0	0	0	0	0	0	0	0	0	0	0
434	Annexin A1 OS=Homo sapiens GN=ANXA1 PE=1 SV=2	ANXA1_HUMAN	39	7.04	Homo sapiens	0	0	0	0	0	0	0	0	0	3	0	2	3	0	0	0	0	0	0	0	0	0	0	0	0.0769231	0	0.0512821	0.0769231	0	0	0	0	0	0	0	0	0	0	0	0.00102438	0	0.00065679	0.00102008	0
435	Protein 4.1 OS=Homo sapiens GN=EPB41 PE=1 SV=4	41_HUMAN	97	5.27	Homo sapiens	0	0	0	0	0	0	0	0	0	0	0	0	0	0	0	0	0	0	0	0	0	0	0	0	0	0	0	0	0	0	0	0	0	0	0	0	0	0	0	0	0	0	0	0
436	Aconitate hydratase, mitochondrial OS=Homo sapiens GN=ACO2 PE=1 SV=2	ACON_HUMAN	85	7.65	Homo sapiens	2	4	2	0	2	3	2	2	2	0	0	0	0	0	0	0.0235294	0.0470588	0.0235294	0	0.0235294	0.0352941	0.0235294	0.0235294	0.0235294	0	0	0	0	0	0	0.000301196	0.000553845	0.000266124	0	0.000318513	0.000446773	0.000321762	0.00031982	0.000304818	0	0	0	0	0
437	Ras-related protein Rab-14 OS=Homo sapiens GN=RAB14 PE=1 SV=4	RAB14_HUMAN	24	6.13	Homo sapiens	0	4	4	0	4	4	3	0	4	0	0	0	0	0	0	0	0.166667	0.166667	0	0.166667	0.166667	0.125	0	0.166667	0	0	0	0	0	0	0	0.00196154	0.00188505	0	0.00225614	0.00210976	0.00170936	0	0.00215913	0	0	0	0	0
438	Corticosteroid-binding globulin OS=Homo sapiens GN=SERPINA6 PE=1 SV=1	CBG_HUMAN	45	5.95	Homo sapiens	0	0	0	0	0	0	0	0	0	6	4	6	4	5	6	0	0	0	0	0	0	0	0	0	0.133333	0.0888889	0.133333	0.0888889	0.111111	0.133333	0	0	0	0	0	0	0	0	0	0.00177559	0.00125651	0.00170765	0.00117876	0.00134447
439	CD226 antigen OS=Homo sapiens GN=CD226 PE=1 SV=2	CD226_HUMAN	39	8.04	Homo sapiens	0	2	2	0	0	0	0	0	0	0	0	0	0	0	0	0	0.0512821	0.0512821	0	0	0	0	0	0	0	0	0	0	0	0	0	0.000603549	0.000580014	0	0	0	0	0	0	0	0	0	0	0
440	Keratin, type II cytoskeletal 6C OS=Homo sapiens GN=KRT6C PE=1 SV=3	K2C6C_HUMAN	60	8.16	Homo sapiens	0	0	0	0	0	0	12	0	10	0	0	0	0	0	0	0	0	0	0	0	0	0.2	0	0.166667	0	0	0	0	0	0	0	0	0	0	0	0	0.00273497	0	0.00215913	0	0	0	0	0
441	cAMP-dependent protein kinase type I-alpha regulatory subunit OS=Homo sapiens GN=PRKAR1A PE=1 SV=1	KAP0_HUMAN	43	5	Homo sapiens	2	3	0	2	0	2	2	0	2	0	0	0	0	0	0	0.0465116	0.0697674	0	0.0465116	0	0.0465116	0.0465116	0	0.0465116	0	0	0	0	0	0	0.000595387	0.000821108	0	0.000583497	0	0.000588771	0.000636041	0	0.000602547	0	0	0	0	0
442	Histone H1.3 OS=Homo sapiens GN=HIST1H1D PE=1 SV=2	H13_HUMAN	22	11.79	Homo sapiens	2	3	0	2	0	4	0	4	3	0	0	0	0	0	0	0.0909091	0.136364	0	0.0909091	0	0.181818	0	0.181818	0.136364	0	0	0	0	0	0	0.00116371	0.00160489	0	0.00114047	0	0.00230156	0	0.00247134	0.00176656	0	0	0	0	0
443	Apolipoprotein A-V OS=Homo sapiens GN=APOA5 PE=1 SV=1	APOA5_HUMAN	41	6.4	Homo sapiens	0	0	0	0	0	0	0	0	0	0	2	2	2	0	0	0	0	0	0	0	0	0	0	0	0	0.0487805	0.0487805	0.0487805	0	0	0	0	0	0	0	0	0	0	0	0	0.00068955	0.000624751	0.000646881	0
444	Myosin light chain kinase, smooth muscle OS=Homo sapiens GN=MYLK PE=1 SV=4	MYLK_HUMAN	211	6.03	Homo sapiens	2	0	0	0	0	0	0	0	0	0	0	0	0	0	0	0.00947867	0	0	0	0	0	0	0	0	0	0	0	0	0	0	0.000121335	0	0	0	0	0	0	0	0	0	0	0	0	0
445	Brain acid soluble protein 1 OS=Homo sapiens GN=BASP1 PE=1 SV=2	BASP1_HUMAN	23	4.3	Homo sapiens	0	0	0	0	0	0	0	0	0	0	0	0	0	0	0	0	0	0	0	0	0	0	0	0	0	0	0	0	0	0	0	0	0	0	0	0	0	0	0	0	0	0	0	0
446	ATP synthase subunit gamma, mitochondrial OS=Homo sapiens GN=ATP5C1 PE=1 SV=1	ATPG_HUMAN	33	9.71	Homo sapiens	2	0	0	2	2	0	0	2	2	0	0	0	0	0	0	0.0606061	0	0	0.0606061	0.0606061	0	0	0.0606061	0.0606061	0	0	0	0	0	0	0.000775807	0	0	0.000760314	0.000820413	0	0	0.000823779	0.000785137	0	0	0	0	0
447	F-actin-capping protein subunit alpha-2 OS=Homo sapiens GN=CAPZA2 PE=1 SV=3	CAZA2_HUMAN	33	5.65	Homo sapiens	3	3	3	3	3	2	0	2	2	0	0	0	0	0	0	0.0909091	0.0909091	0.0909091	0.0909091	0.0909091	0.0606061	0	0.0606061	0.0606061	0	0	0	0	0	0	0.00116371	0.00106993	0.00102821	0.00114047	0.00123062	0.000767187	0	0.000823779	0.000785137	0	0	0	0	0
448	cGMP-specific 3',5'-cyclic phosphodiesterase OS=Homo sapiens GN=PDE5A PE=1 SV=2	PDE5A_HUMAN	100	6	Homo sapiens	0	0	0	0	0	0	0	2	2	0	0	0	0	0	0	0	0	0	0	0	0	0	0.02	0.02	0	0	0	0	0	0	0	0	0	0	0	0	0	0.000271847	0.000259095	0	0	0	0	0
449	Drebrin-like protein OS=Homo sapiens GN=DBNL PE=1 SV=1	DBNL_HUMAN	48	4.72	Homo sapiens	0	2	3	2	0	0	0	2	2	0	0	0	0	0	0	0	0.0416667	0.0625	0.0416667	0	0	0	0.0416667	0.0416667	0	0	0	0	0	0	0	0.000490384	0.000706892	0.000522716	0	0	0	0.000566348	0.000539781	0	0	0	0	0
450	Actin-related protein 2/3 complex subunit 5 OS=Homo sapiens GN=ARPC5 PE=1 SV=3	ARPC5_HUMAN	16	5.3	Homo sapiens	0	2	0	2	0	2	0	0	0	0	0	0	0	0	0	0	0.125	0	0.125	0	0.125	0	0	0	0	0	0	0	0	0	0	0.00147115	0	0.00156815	0	0.00158232	0	0	0	0	0	0	0	0
451	Tropomyosin alpha-1 chain OS=Homo sapiens GN=TPM1 PE=1 SV=2	TPM1_HUMAN	33	4.39	Homo sapiens	11	0	0	0	0	10	0	0	0	0	0	0	0	0	0	0.333333	0	0	0	0	0.30303	0	0	0	0	0	0	0	0	0	0.00426694	0	0	0	0	0.00383593	0	0	0	0	0	0	0	0
452	Transforming growth factor beta-1-induced transcript 1 protein OS=Homo sapiens GN=TGFB1I1 PE=1 SV=2	TGFI1_HUMAN	50	7.03	Homo sapiens	2	2	2	0	2	3	0	0	0	0	0	0	0	0	0	0.04	0.04	0.04	0	0.04	0.06	0	0	0	0	0	0	0	0	0	0.000512032	0.000470769	0.000452411	0	0.000541473	0.000759515	0	0	0	0	0	0	0	0
453	Prohibitin OS=Homo sapiens GN=PHB PE=1 SV=1	PHB_HUMAN	30	5.46	Homo sapiens	2	2	2	0	0	0	0	2	0	0	0	0	0	0	0	0.0666667	0.0666667	0.0666667	0	0	0	0	0.0666667	0	0	0	0	0	0	0	0.000853387	0.000784614	0.000754019	0	0	0	0	0.000906157	0	0	0	0	0	0
454	Coiled-coil-helix-coiled-coil-helix domain-containing protein 3, mitochondrial OS=Homo sapiens GN=CHCHD3 PE=1 SV=1	CHCH3_HUMAN	26	8.48	Homo sapiens	0	2	2	2	2	2	0	0	2	0	0	0	0	0	0	0	0.0769231	0.0769231	0.0769231	0.0769231	0.0769231	0	0	0.0769231	0	0	0	0	0	0	0	0.000905324	0.000870021	0.000965014	0.00104129	0.000973737	0	0	0.00099652	0	0	0	0	0
455	Ras GTPase-activating-like protein IQGAP2 OS=Homo sapiens GN=IQGAP2 PE=1 SV=4	IQGA2_HUMAN	181	5.33	Homo sapiens	0	0	2	0	0	0	0	0	0	0	0	0	0	0	0	0	0	0.0110497	0	0	0	0	0	0	0	0	0	0	0	0	0	0	0.000124975	0	0	0	0	0	0	0	0	0	0	0
456	Purine nucleoside phosphorylase OS=Homo sapiens GN=PNP PE=1 SV=2	PNPH_HUMAN	32	6.95	Homo sapiens	0	0	0	0	2	2	0	0	2	0	0	0	0	0	0	0	0	0	0	0.0625	0.0625	0	0	0.0625	0	0	0	0	0	0	0	0	0	0	0.000846051	0.000791161	0	0	0.000809672	0	0	0	0	0
457	Guanine nucleotide-binding protein subunit alpha-13 OS=Homo sapiens GN=GNA13 PE=1 SV=2	GNA13_HUMAN	44	8.13	Homo sapiens	4	3	0	3	2	0	0	2	2	0	0	0	0	0	0	0.0909091	0.0681818	0	0.0681818	0.0454545	0	0	0.0454545	0.0454545	0	0	0	0	0	0	0.00116371	0.000802446	0	0.000855353	0.00061531	0	0	0.000617834	0.000588852	0	0	0	0	0
458	T-complex protein 1 subunit gamma OS=Homo sapiens GN=CCT3 PE=1 SV=4	TCPG_HUMAN	61	6.44	Homo sapiens	0	2	2	0	0	2	2	2	2	0	0	0	0	0	0	0	0.0327869	0.0327869	0	0	0.0327869	0.0327869	0.0327869	0.0327869	0	0	0	0	0	0	0	0.000385876	0.000370829	0	0	0.000415035	0.000448356	0.000445651	0.000424746	0	0	0	0	0
459	Ig heavy chain V-III region TUR OS=Homo sapiens PE=1 SV=1	HV318_HUMAN	12	10.12	Homo sapiens	0	0	0	0	0	0	0	0	0	0	0	0	0	0	0	0	0	0	0	0	0	0	0	0	0	0	0	0	0	0	0	0	0	0	0	0	0	0	0	0	0	0	0	0
460	GTP-binding protein SAR1a OS=Homo sapiens GN=SAR1A PE=1 SV=1	SAR1A_HUMAN	22	6.68	Homo sapiens	0	0	0	0	0	0	0	2	2	0	0	0	0	0	0	0	0	0	0	0	0	0	0.0909091	0.0909091	0	0	0	0	0	0	0	0	0	0	0	0	0	0.00123567	0.0011777	0	0	0	0	0
461	Hemoglobin subunit delta OS=Homo sapiens GN=HBD PE=1 SV=2	HBD_HUMAN	16	8.26	Homo sapiens	0	0	0	0	0	0	0	0	0	0	0	0	0	0	0	0	0	0	0	0	0	0	0	0	0	0	0	0	0	0	0	0	0	0	0	0	0	0	0	0	0	0	0	0
462	Alpha-soluble NSF attachment protein OS=Homo sapiens GN=NAPA PE=1 SV=3	SNAA_HUMAN	33	5.02	Homo sapiens	0	0	2	0	0	0	2	3	2	0	0	0	0	0	0	0	0	0.0606061	0	0	0	0.0606061	0.0909091	0.0606061	0	0	0	0	0	0	0	0	0.000685471	0	0	0	0.00082878	0.00123567	0.000785137	0	0	0	0	0
463	Succinate dehydrogenase [ubiquinone] flavoprotein subunit, mitochondrial OS=Homo sapiens GN=SDHA PE=1 SV=2	DHSA_HUMAN	73	7.06	Homo sapiens	0	2	3	0	0	0	3	0	0	0	0	0	0	0	0	0	0.0273973	0.0410959	0	0	0	0.0410959	0	0	0	0	0	0	0	0	0	0.000322444	0.000464806	0	0	0	0.000561981	0	0	0	0	0	0	0
464	Mannan-binding lectin serine protease 1 OS=Homo sapiens GN=MASP1 PE=1 SV=3	MASP1_HUMAN	79	5.18	Homo sapiens	0	0	0	0	0	0	0	0	0	5	5	4	0	0	3	0	0	0	0	0	0	0	0	0	0.0632911	0.0632911	0.0506329	0	0	0.0379747	0	0	0	0	0	0	0	0	0	0.000842842	0.00089467	0.000648476	0	0
465	Keratin, type II cytoskeletal 1b OS=Homo sapiens GN=KRT77 PE=2 SV=3	K2C1B_HUMAN	62	5.78	Homo sapiens	0	0	0	0	0	0	0	0	0	0	0	0	0	0	0	0	0	0	0	0	0	0	0	0	0	0	0	0	0	0	0	0	0	0	0	0	0	0	0	0	0	0	0	0
466	Pregnancy zone protein OS=Homo sapiens GN=PZP PE=1 SV=4	PZP_HUMAN	164	6.33	Homo sapiens	0	0	0	0	0	0	0	0	0	0	0	0	0	0	0	0	0	0	0	0	0	0	0	0	0	0	0	0	0	0	0	0	0	0	0	0	0	0	0	0	0	0	0	0
467	Septin-11 OS=Homo sapiens GN=SEPT11 PE=1 SV=3	SEP11_HUMAN	49	6.8	Homo sapiens	2	2	0	3	0	2	0	2	0	0	0	0	0	0	0	0.0408163	0.0408163	0	0.0612245	0	0.0408163	0	0.0408163	0	0	0	0	0	0	0	0.000522482	0.000480376	0	0.000768072	0	0.000516677	0	0.00055479	0	0	0	0	0	0
468	Keratin, type II cytoskeletal 6B OS=Homo sapiens GN=KRT6B PE=1 SV=5	K2C6B_HUMAN	60	8.16	Homo sapiens	0	0	0	0	0	0	0	0	0	0	0	0	0	0	0	0	0	0	0	0	0	0	0	0	0	0	0	0	0	0	0	0	0	0	0	0	0	0	0	0	0	0	0	0
469	Dynamin-1-like protein OS=Homo sapiens GN=DNM1L PE=1 SV=2	DNM1L_HUMAN	82	6.8	Homo sapiens	2	2	0	0	0	0	0	2	0	0	0	0	0	0	0	0.0243902	0.0243902	0	0	0	0	0	0.0243902	0	0	0	0	0	0	0	0.000312215	0.000287054	0	0	0	0	0	0.000331521	0	0	0	0	0	0
470	Glutathione S-transferase omega-1 OS=Homo sapiens GN=GSTO1 PE=1 SV=2	GSTO1_HUMAN	28	6.54	Homo sapiens	0	0	0	0	0	0	0	2	2	0	0	0	0	0	0	0	0	0	0	0	0	0	0.0714286	0.0714286	0	0	0	0	0	0	0	0	0	0	0	0	0	0.000970883	0.00092534	0	0	0	0	0
471	ATPase inhibitor, mitochondrial OS=Homo sapiens GN=ATPIF1 PE=1 SV=1	ATIF1_HUMAN	12	10.05	Homo sapiens	0	0	0	0	0	0	0	0	0	0	0	0	0	0	0	0	0	0	0	0	0	0	0	0	0	0	0	0	0	0	0	0	0	0	0	0	0	0	0	0	0	0	0	0
472	2,4-dienoyl-CoA reductase, mitochondrial OS=Homo sapiens GN=DECR1 PE=1 SV=1	DECR_HUMAN	36	9.84	Homo sapiens	0	2	2	2	0	0	0	2	2	0	0	0	0	0	0	0	0.0555556	0.0555556	0.0555556	0	0	0	0.0555556	0.0555556	0	0	0	0	0	0	0	0.000653845	0.000628349	0.000696955	0	0	0	0.000755131	0.000719709	0	0	0	0	0
473	Ig heavy chain V-I region V35 OS=Homo sapiens PE=1 SV=1	HV103_HUMAN	13	9.87	Homo sapiens	0	0	0	0	0	0	0	0	0	0	0	0	0	0	0	0	0	0	0	0	0	0	0	0	0	0	0	0	0	0	0	0	0	0	0	0	0	0	0	0	0	0	0	0
474	T-complex protein 1 subunit theta OS=Homo sapiens GN=CCT8 PE=1 SV=4	TCPQ_HUMAN	60	5.3	Homo sapiens	2	4	4	0	0	3	3	0	0	0	0	0	0	0	0	0.0333333	0.0666667	0.0666667	0	0	0.05	0.05	0	0	0	0	0	0	0	0	0.000426694	0.000784614	0.000754019	0	0	0.000632929	0.000683744	0	0	0	0	0	0	0
475	Thioredoxin OS=Homo sapiens GN=TXN PE=1 SV=3	THIO_HUMAN	12	4.55	Homo sapiens	0	0	0	0	0	0	0	0	0	0	0	0	0	0	0	0	0	0	0	0	0	0	0	0	0	0	0	0	0	0	0	0	0	0	0	0	0	0	0	0	0	0	0	0
476	Phosphatidylcholine-sterol acyltransferase OS=Homo sapiens GN=LCAT PE=1 SV=1	LCAT_HUMAN	50	6.04	Homo sapiens	0	0	0	0	0	0	0	0	0	3	3	2	0	3	3	0	0	0	0	0	0	0	0	0	0.06	0.06	0.04	0	0.06	0.06	0	0	0	0	0	0	0	0	0	0.000799014	0.000848147	0.000512296	0	0.000726014
477	Neutral alpha-glucosidase AB OS=Homo sapiens GN=GANAB PE=1 SV=3	GANAB_HUMAN	107	6.06	Homo sapiens	2	0	2	2	2	0	0	0	0	0	0	0	0	0	0	0.0186916	0	0.0186916	0.0186916	0.0186916	0	0	0	0	0	0	0	0	0	0	0.000239268	0	0.000211407	0.000234489	0.000253025	0	0	0	0	0	0	0	0	0
478	Ig kappa chain V-I region Wes OS=Homo sapiens PE=1 SV=1	KV119_HUMAN	12	7.41	Homo sapiens	0	0	0	0	0	0	0	0	0	0	0	0	0	0	0	0	0	0	0	0	0	0	0	0	0	0	0	0	0	0	0	0	0	0	0	0	0	0	0	0	0	0	0	0
479	Guanine nucleotide-binding protein subunit beta-4 OS=Homo sapiens GN=GNB4 PE=1 SV=3	GBB4_HUMAN	38	5.85	Homo sapiens	0	0	0	3	0	3	4	0	0	0	0	0	0	0	0	0	0	0	0.0789474	0	0.0789474	0.105263	0	0	0	0	0	0	0	0	0	0	0	0.000990409	0	0.000999361	0.00143946	0	0	0	0	0	0	0
480	Antileukoproteinase OS=Homo sapiens GN=SLPI PE=1 SV=2	SLPI_HUMAN	14	8.85	Homo sapiens	0	0	0	0	0	0	0	0	0	0	0	0	0	0	0	0	0	0	0	0	0	0	0	0	0	0	0	0	0	0	0	0	0	0	0	0	0	0	0	0	0	0	0	0
481	Guanine nucleotide-binding protein G(z) subunit alpha OS=Homo sapiens GN=GNAZ PE=2 SV=3	GNAZ_HUMAN	41	7.69	Homo sapiens	0	0	0	0	0	0	0	0	0	0	0	0	0	0	0	0	0	0	0	0	0	0	0	0	0	0	0	0	0	0	0	0	0	0	0	0	0	0	0	0	0	0	0	0
482	Carcinoembryonic antigen-related cell adhesion molecule 8 OS=Homo sapiens GN=CEACAM8 PE=1 SV=2	CEAM8_HUMAN	38	7.45	Homo sapiens	0	0	0	0	0	0	0	0	0	0	0	0	0	0	0	0	0	0	0	0	0	0	0	0	0	0	0	0	0	0	0	0	0	0	0	0	0	0	0	0	0	0	0	0
483	Glucosidase 2 subunit beta OS=Homo sapiens GN=PRKCSH PE=1 SV=2	GLU2B_HUMAN	59	4.05	Homo sapiens	0	0	2	0	2	0	2	2	0	0	0	0	0	0	0	0	0	0.0338983	0	0.0338983	0	0.0338983	0.0338983	0	0	0	0	0	0	0	0	0	0.000383399	0	0.000458875	0	0.000463555	0.000460758	0	0	0	0	0	0
484	Neurogranin OS=Homo sapiens GN=NRGN PE=1 SV=1	NEUG_HUMAN	8	8.06	Homo sapiens	2	2	2	2	2	3	2	2	2	0	0	0	0	0	0	0.25	0.25	0.25	0.25	0.25	0.375	0.25	0.25	0.25	0	0	0	0	0	0	0.0032002	0.0029423	0.00282757	0.0031363	0.0033842	0.00474697	0.00341872	0.00339809	0.00323869	0	0	0	0	0
485	Tyrosine-protein kinase BTK OS=Homo sapiens GN=BTK PE=1 SV=3	BTK_HUMAN	76	7.86	Homo sapiens	2	2	0	2	2	3	3	0	3	0	0	0	0	0	0	0.0263158	0.0263158	0	0.0263158	0.0263158	0.0394737	0.0394737	0	0.0394737	0	0	0	0	0	0	0.000336863	0.000309716	0	0.000330136	0.000356232	0.000499681	0.000539798	0	0.000511372	0	0	0	0	0
486	Citrate synthase, mitochondrial OS=Homo sapiens GN=CS PE=1 SV=2	CISY_HUMAN	52	8.53	Homo sapiens	0	0	0	0	0	0	0	0	0	0	0	0	0	0	0	0	0	0	0	0	0	0	0	0	0	0	0	0	0	0	0	0	0	0	0	0	0	0	0	0	0	0	0	0
487	Very long-chain specific acyl-CoA dehydrogenase, mitochondrial OS=Homo sapiens GN=ACADVL PE=1 SV=1	ACADV_HUMAN	70	9.1	Homo sapiens	0	0	0	3	3	3	0	0	0	0	0	0	0	0	0	0	0	0	0.0428571	0.0428571	0.0428571	0	0	0	0	0	0	0	0	0	0	0	0	0.000537651	0.000580149	0.00054251	0	0	0	0	0	0	0	0
488	Annexin A11 OS=Homo sapiens GN=ANXA11 PE=1 SV=1	ANX11_HUMAN	54	7.77	Homo sapiens	0	0	2	0	0	0	0	0	0	0	0	0	0	0	0	0	0	0.037037	0	0	0	0	0	0	0	0	0	0	0	0	0	0	0.000418899	0	0	0	0	0	0	0	0	0	0	0
489	Protein NipSnap homolog 3A OS=Homo sapiens GN=NIPSNAP3A PE=1 SV=2	NPS3A_HUMAN	28	9.55	Homo sapiens	0	0	0	0	0	0	0	0	2	0	0	0	0	0	0	0	0	0	0	0	0	0	0	0.0714286	0	0	0	0	0	0	0	0	0	0	0	0	0	0	0.00092534	0	0	0	0	0
490	Apoptosis-inducing factor 1, mitochondrial OS=Homo sapiens GN=AIFM1 PE=1 SV=1	AIFM1_HUMAN	67	9.39	Homo sapiens	0	0	0	0	2	0	0	0	0	0	0	0	0	0	0	0	0	0	0	0.0298507	0	0	0	0	0	0	0	0	0	0	0	0	0	0	0.000404084	0	0	0	0	0	0	0	0	0
491	Ras GTPase-activating protein 3 OS=Homo sapiens GN=RASA3 PE=1 SV=3	RASA3_HUMAN	96	7.16	Homo sapiens	0	2	3	0	2	0	2	3	3	0	0	0	0	0	0	0	0.0208333	0.03125	0	0.0208333	0	0.0208333	0.03125	0.03125	0	0	0	0	0	0	0	0.000245192	0.000353446	0	0.000282017	0	0.000284893	0.000424761	0.000404836	0	0	0	0	0
492	HLA class I histocompatibility antigen, B-18 alpha chain OS=Homo sapiens GN=HLA-B PE=1 SV=1	1B18_HUMAN	40	6.74	Homo sapiens	0	0	0	0	0	0	0	8	0	0	0	0	0	0	0	0	0	0	0	0	0	0	0.2	0	0	0	0	0	0	0	0	0	0	0	0	0	0	0.00271847	0	0	0	0	0	0
493	Protein S100-A6 OS=Homo sapiens GN=S100A6 PE=1 SV=1	S10A6_HUMAN	10	5.15	Homo sapiens	0	0	0	0	0	0	0	0	0	0	0	0	0	0	0	0	0	0	0	0	0	0	0	0	0	0	0	0	0	0	0	0	0	0	0	0	0	0	0	0	0	0	0	0
494	Serglycin OS=Homo sapiens GN=SRGN PE=1 SV=3	SRGN_HUMAN	18	4.57	Homo sapiens	2	0	0	2	0	2	0	0	0	0	0	0	0	0	0	0.111111	0	0	0.111111	0	0.111111	0	0	0	0	0	0	0	0	0	0.00142231	0	0	0.00139391	0	0.00140651	0	0	0	0	0	0	0	0
495	Thioredoxin-related transmembrane protein 1 OS=Homo sapiens GN=TMX1 PE=1 SV=1	TMX1_HUMAN	32	4.63	Homo sapiens	0	0	0	0	0	0	0	0	2	0	0	0	0	0	0	0	0	0	0	0	0	0	0	0.0625	0	0	0	0	0	0	0	0	0	0	0	0	0	0	0.000809672	0	0	0	0	0
496	Sushi, von Willebrand factor type A, EGF and pentraxin domain-containing protein 1 OS=Homo sapiens GN=SVEP1 PE=1 SV=3	SVEP1_HUMAN	390	5.2	Homo sapiens	0	0	0	0	0	0	0	0	0	0	0	0	0	0	0	0	0	0	0	0	0	0	0	0	0	0	0	0	0	0	0	0	0	0	0	0	0	0	0	0	0	0	0	0
497	Ribonuclease 4 OS=Homo sapiens GN=RNASE4 PE=1 SV=3	RNAS4_HUMAN	17	9.17	Homo sapiens	0	0	0	0	0	0	0	0	0	0	0	0	0	0	0	0	0	0	0	0	0	0	0	0	0	0	0	0	0	0	0	0	0	0	0	0	0	0	0	0	0	0	0	0
498	Tubulin alpha-1C chain OS=Homo sapiens GN=TUBA1C PE=1 SV=1	TBA1C_HUMAN	50	4.73	Homo sapiens	13	16	20	16	0	0	16	13	13	0	0	0	0	0	0	0.26	0.32	0.4	0.32	0	0	0.32	0.26	0.26	0	0	0	0	0	0	0.00332821	0.00376615	0.00452411	0.00401446	0	0	0.00437596	0.00353401	0.00336824	0	0	0	0	0
499	ATP synthase subunit d, mitochondrial OS=Homo sapiens GN=ATP5H PE=1 SV=3	ATP5H_HUMAN	18	4.94	Homo sapiens	2	3	2	0	0	0	0	0	0	0	0	0	0	0	0	0.111111	0.166667	0.111111	0	0	0	0	0	0	0	0	0	0	0	0	0.00142231	0.00196154	0.0012567	0	0	0	0	0	0	0	0	0	0	0
500	Ras-related protein Rab-5C OS=Homo sapiens GN=RAB5C PE=1 SV=2	RAB5C_HUMAN	23	8.61	Homo sapiens	0	0	0	0	0	0	2	0	0	0	0	0	0	0	0	0	0	0	0	0	0	0.0869565	0	0	0	0	0	0	0	0	0	0	0	0	0	0	0.00118912	0	0	0	0	0	0	0
501	ATP synthase subunit delta, mitochondrial OS=Homo sapiens GN=ATP5D PE=1 SV=2	ATPD_HUMAN	17	5.19	Homo sapiens	0	0	0	0	0	0	0	0	0	0	0	0	0	0	0	0	0	0	0	0	0	0	0	0	0	0	0	0	0	0	0	0	0	0	0	0	0	0	0	0	0	0	0	0
502	Dolichyl-diphosphooligosaccharide--protein glycosyltransferase 48 kDa subunit OS=Homo sapiens GN=DDOST PE=1 SV=4	OST48_HUMAN	51	6.52	Homo sapiens	0	2	0	0	0	2	0	0	0	0	0	0	0	0	0	0	0.0392157	0	0	0	0.0392157	0	0	0	0	0	0	0	0	0	0	0.000461538	0	0	0	0.000496415	0	0	0	0	0	0	0	0
503	Keratin, type II cytoskeletal 80 OS=Homo sapiens GN=KRT80 PE=1 SV=2	K2C80_HUMAN	51	5.36	Homo sapiens	0	0	0	0	0	0	0	0	0	0	0	0	0	0	0	0	0	0	0	0	0	0	0	0	0	0	0	0	0	0	0	0	0	0	0	0	0	0	0	0	0	0	0	0
504	Small proline-rich protein 2A OS=Homo sapiens GN=SPRR2A PE=1 SV=1	SPR2A_HUMAN (+4)	8	8.49	Homo sapiens	0	0	0	0	0	0	0	0	0	2	3	2	0	0	0	0	0	0	0	0	0	0	0	0	0.25	0.375	0.25	0	0	0	0	0	0	0	0	0	0	0	0	0.00332923	0.00530092	0.00320185	0	0
505	Collectin-11 OS=Homo sapiens GN=COLEC11 PE=1 SV=1	COL11_HUMAN	29	5.06	Homo sapiens	0	0	0	0	0	0	0	0	0	0	0	0	0	0	2	0	0	0	0	0	0	0	0	0	0	0	0	0	0	0.0689655	0	0	0	0	0	0	0	0	0	0	0	0	0	0
506	Src substrate cortactin OS=Homo sapiens GN=CTTN PE=1 SV=2	SRC8_HUMAN	62	5.05	Homo sapiens	0	0	0	0	0	0	0	0	0	0	0	0	0	0	0	0	0	0	0	0	0	0	0	0	0	0	0	0	0	0	0	0	0	0	0	0	0	0	0	0	0	0	0	0
507	Septin-5 OS=Homo sapiens GN=SEPT5 PE=1 SV=1	SEPT5_HUMAN	43	6.65	Homo sapiens	0	0	0	0	0	0	2	0	0	0	0	0	0	0	0	0	0	0	0	0	0	0.0465116	0	0	0	0	0	0	0	0	0	0	0	0	0	0	0.000636041	0	0	0	0	0	0	0
508	Protein Shroom3 OS=Homo sapiens GN=SHROOM3 PE=1 SV=2	SHRM3_HUMAN	217	7.85	Homo sapiens	0	0	0	0	0	0	0	0	0	0	0	0	0	0	0	0	0	0	0	0	0	0	0	0	0	0	0	0	0	0	0	0	0	0	0	0	0	0	0	0	0	0	0	0
509	Transforming growth factor-beta-induced protein ig-h3 OS=Homo sapiens GN=TGFBI PE=1 SV=1	BGH3_HUMAN	75	7.77	Homo sapiens	0	0	0	0	0	0	0	0	0	0	0	0	0	0	0	0	0	0	0	0	0	0	0	0	0	0	0	0	0	0	0	0	0	0	0	0	0	0	0	0	0	0	0	0
510	SH3 domain-binding glutamic acid-rich-like protein 3 OS=Homo sapiens GN=SH3BGRL3 PE=1 SV=1	SH3L3_HUMAN	10	4.56	Homo sapiens	0	0	2	0	0	0	0	0	0	0	0	0	0	0	0	0	0	0.2	0	0	0	0	0	0	0	0	0	0	0	0	0	0	0.00226206	0	0	0	0	0	0	0	0	0	0	0
511	FYN-binding protein OS=Homo sapiens GN=FYB PE=1 SV=2	FYB_HUMAN	85	6.41	Homo sapiens	0	0	0	0	0	0	0	0	0	0	0	0	0	0	0	0	0	0	0	0	0	0	0	0	0	0	0	0	0	0	0	0	0	0	0	0	0	0	0	0	0	0	0	0
512	Beta-Ala-His dipeptidase OS=Homo sapiens GN=CNDP1 PE=1 SV=4	CNDP1_HUMAN	57	4.95	Homo sapiens	0	0	0	0	0	0	0	0	0	3	2	2	2	4	4	0	0	0	0	0	0	0	0	0	0.0526316	0.0350877	0.0350877	0.0350877	0.0701754	0.0701754	0	0	0	0	0	0	0	0	0	0.00070089	0.000495992	0.000449382	0.000465301	0.000849139
513	Galectin-3-binding protein OS=Homo sapiens GN=LGALS3BP PE=1 SV=1	LG3BP_HUMAN	65	4.9	Homo sapiens	0	0	0	0	0	0	0	0	0	0	0	0	0	0	0	0	0	0	0	0	0	0	0	0	0	0	0	0	0	0	0	0	0	0	0	0	0	0	0	0	0	0	0	0
514	Basigin OS=Homo sapiens GN=BSG PE=1 SV=2	BASI_HUMAN	42	5.4	Homo sapiens	0	2	0	0	2	0	0	0	0	0	0	0	0	0	0	0	0.047619	0	0	0.047619	0	0	0	0	0	0	0	0	0	0	0	0.000560439	0	0	0.00064461	0	0	0	0	0	0	0	0	0
515	Rho GDP-dissociation inhibitor 2 OS=Homo sapiens GN=ARHGDIB PE=1 SV=3	GDIR2_HUMAN	23	4.84	Homo sapiens	0	2	0	0	0	0	0	0	0	0	0	0	0	0	0	0	0.0869565	0	0	0	0	0	0	0	0	0	0	0	0	0	0	0.00102341	0	0	0	0	0	0	0	0	0	0	0	0
516	Hydroxyacyl-coenzyme A dehydrogenase, mitochondrial OS=Homo sapiens GN=HADH PE=1 SV=3	HCDH_HUMAN	34	9.41	Homo sapiens	0	2	2	4	0	0	0	0	0	0	0	0	0	0	0	0	0.0588235	0.0588235	0.117647	0	0	0	0	0	0	0	0	0	0	0	0	0.000692307	0.00066531	0.0014759	0	0	0	0	0	0	0	0	0	0
517	Src kinase-associated phosphoprotein 2 OS=Homo sapiens GN=SKAP2 PE=1 SV=1	SKAP2_HUMAN	41	4.29	Homo sapiens	0	0	0	0	0	0	0	0	0	0	0	0	0	0	0	0	0	0	0	0	0	0	0	0	0	0	0	0	0	0	0	0	0	0	0	0	0	0	0	0	0	0	0	0
518	Attractin OS=Homo sapiens GN=ATRN PE=1 SV=2	ATRN_HUMAN	159	7.32	Homo sapiens	0	0	0	0	0	0	0	0	0	0	0	0	0	0	0	0	0	0	0	0	0	0	0	0	0	0	0	0	0	0	0	0	0	0	0	0	0	0	0	0	0	0	0	0
519	Lymphocyte antigen 6 complex locus protein G6f OS=Homo sapiens GN=LY6G6F PE=1 SV=2	LY66F_HUMAN	32	8.65	Homo sapiens	2	0	0	0	0	0	0	0	0	0	0	0	0	0	0	0.0625	0	0	0	0	0	0	0	0	0	0	0	0	0	0	0.000800051	0	0	0	0	0	0	0	0	0	0	0	0	0
520	BPI fold-containing family B member 1 OS=Homo sapiens GN=BPIFB1 PE=1 SV=1	BPIB1_HUMAN	52	7.26	Homo sapiens	0	0	0	0	0	0	0	0	0	2	0	2	0	0	0	0	0	0	0	0	0	0	0	0	0.0384615	0	0.0384615	0	0	0	0	0	0	0	0	0	0	0	0	0.000512189	0	0.000492592	0	0
521	Lumican OS=Homo sapiens GN=LUM PE=1 SV=2	LUM_HUMAN	38	6.6	Homo sapiens	0	0	0	0	0	0	0	0	0	0	2	0	0	2	2	0	0	0	0	0	0	0	0	0	0	0.0526316	0	0	0.0526316	0.0526316	0	0	0	0	0	0	0	0	0	0	0.000743988	0	0	0.000636854
522	Thiosulfate sulfurtransferase OS=Homo sapiens GN=TST PE=1 SV=4	THTR_HUMAN	33	7.28	Homo sapiens	0	0	2	0	0	0	0	0	0	0	0	0	0	0	0	0	0	0.0606061	0	0	0	0	0	0	0	0	0	0	0	0	0	0	0.000685471	0	0	0	0	0	0	0	0	0	0	0
523	WD repeat-containing protein 44 OS=Homo sapiens GN=WDR44 PE=1 SV=1	WDR44_HUMAN	101	5.1	Homo sapiens	0	0	0	0	0	0	2	2	2	0	0	0	0	0	0	0	0	0	0	0	0	0.019802	0.019802	0.019802	0	0	0	0	0	0	0	0	0	0	0	0	0.00027079	0.000269156	0.00025653	0	0	0	0	0
524	Leukocyte surface antigen CD47 OS=Homo sapiens GN=CD47 PE=1 SV=1	CD47_HUMAN	35	7.27	Homo sapiens	0	0	0	2	0	0	0	0	0	0	0	0	0	0	0	0	0	0	0.0571429	0	0	0	0	0	0	0	0	0	0	0	0	0	0	0.000716868	0	0	0	0	0	0	0	0	0	0
525	Calcium uniporter protein, mitochondrial OS=Homo sapiens GN=MCU PE=1 SV=1	MCU_HUMAN	40	8.84	Homo sapiens	4	3	2	0	0	0	0	0	2	0	0	0	0	0	0	0.1	0.075	0.05	0	0	0	0	0	0.05	0	0	0	0	0	0	0.00128008	0.000882691	0.000565514	0	0	0	0	0	0.000647738	0	0	0	0	0
526	Anoctamin-6 OS=Homo sapiens GN=ANO6 PE=1 SV=2	ANO6_HUMAN	106	7.83	Homo sapiens	0	0	0	0	0	0	0	0	0	0	0	0	0	0	0	0	0	0	0	0	0	0	0	0	0	0	0	0	0	0	0	0	0	0	0	0	0	0	0	0	0	0	0	0
527	Ig heavy chain V-III region GA OS=Homo sapiens PE=1 SV=1	HV308_HUMAN	13	10.02	Homo sapiens	0	0	0	0	0	0	0	0	0	0	0	0	0	0	0	0	0	0	0	0	0	0	0	0	0	0	0	0	0	0	0	0	0	0	0	0	0	0	0	0	0	0	0	0
528	Inverted formin-2 OS=Homo sapiens GN=INF2 PE=1 SV=2	INF2_HUMAN	136	5.03	Homo sapiens	2	0	0	0	0	0	0	0	0	0	0	0	0	0	0	0.0147059	0	0	0	0	0	0	0	0	0	0	0	0	0	0	0.000188247	0	0	0	0	0	0	0	0	0	0	0	0	0
529	ADP/ATP translocase 3 OS=Homo sapiens GN=SLC25A6 PE=1 SV=4	ADT3_HUMAN	33	10.26	Homo sapiens	0	0	0	4	4	0	5	0	4	0	0	0	0	0	0	0	0	0	0.121212	0.121212	0	0.151515	0	0.121212	0	0	0	0	0	0	0	0	0	0.00152063	0.00164083	0	0.00207195	0	0.00157027	0	0	0	0	0
530	Consortin OS=Homo sapiens GN=CNST PE=1 SV=3	CNST_HUMAN	80	4.14	Homo sapiens	0	0	0	0	0	0	2	0	0	0	0	0	0	0	0	0	0	0	0	0	0	0.025	0	0	0	0	0	0	0	0	0	0	0	0	0	0	0.000341872	0	0	0	0	0	0	0
531	Thioredoxin domain-containing protein 5 OS=Homo sapiens GN=TXNDC5 PE=1 SV=2	TXND5_HUMAN	48	5.86	Homo sapiens	0	0	2	2	0	0	0	0	0	0	0	0	0	0	0	0	0	0.0416667	0.0416667	0	0	0	0	0	0	0	0	0	0	0	0	0	0.000471262	0.000522716	0	0	0	0	0	0	0	0	0	0
532	Ras-related protein Ral-B OS=Homo sapiens GN=RALB PE=1 SV=1	RALB_HUMAN	23	6.56	Homo sapiens	2	3	3	2	2	2	2	0	0	0	0	0	0	0	0	0.0869565	0.130435	0.130435	0.0869565	0.0869565	0.0869565	0.0869565	0	0	0	0	0	0	0	0	0.00111311	0.00153511	0.00147525	0.00109089	0.00117711	0.00110075	0.00118912	0	0	0	0	0	0	0
533	Caspase-14 OS=Homo sapiens GN=CASP14 PE=1 SV=2	CASPE_HUMAN	28	5.28	Homo sapiens	0	0	0	0	0	0	0	0	0	0	0	0	0	0	0	0	0	0	0	0	0	0	0	0	0	0	0	0	0	0	0	0	0	0	0	0	0	0	0	0	0	0	0	0
534	NAD-dependent malic enzyme, mitochondrial OS=Homo sapiens GN=ME2 PE=1 SV=1	MAOM_HUMAN	65	7.67	Homo sapiens	0	0	2	0	0	0	0	0	0	0	0	0	0	0	0	0	0	0.0307692	0	0	0	0	0	0	0	0	0	0	0	0	0	0	0.000348009	0	0	0	0	0	0	0	0	0	0	0
535	Abhydrolase domain-containing protein 16A OS=Homo sapiens GN=ABHD16A PE=1 SV=3	ABHGA_HUMAN	63	8.2	Homo sapiens	0	0	0	0	0	0	0	0	0	0	0	0	0	0	0	0	0	0	0	0	0	0	0	0	0	0	0	0	0	0	0	0	0	0	0	0	0	0	0	0	0	0	0	0
536	Dematin OS=Homo sapiens GN=DMTN PE=1 SV=3	DEMA_HUMAN	46	9.36	Homo sapiens	0	0	0	0	0	0	0	0	0	0	0	0	0	0	0	0	0	0	0	0	0	0	0	0	0	0	0	0	0	0	0	0	0	0	0	0	0	0	0	0	0	0	0	0
537	Keratin, type I cuticular Ha1 OS=Homo sapiens GN=KRT31 PE=1 SV=3	K1H1_HUMAN	47	4.53	Homo sapiens	0	0	0	0	0	0	0	0	0	0	0	0	0	0	0	0	0	0	0	0	0	0	0	0	0	0	0	0	0	0	0	0	0	0	0	0	0	0	0	0	0	0	0	0
538	Peroxiredoxin-2 OS=Homo sapiens GN=PRDX2 PE=1 SV=5	PRDX2_HUMAN	22	5.76	Homo sapiens	0	0	0	0	0	0	0	0	0	0	0	0	0	0	0	0	0	0	0	0	0	0	0	0	0	0	0	0	0	0	0	0	0	0	0	0	0	0	0	0	0	0	0	0
539	Platelet endothelial aggregation receptor 1 OS=Homo sapiens GN=PEAR1 PE=1 SV=1	PEAR1_HUMAN	111	6.81	Homo sapiens	0	2	2	2	2	2	2	2	2	0	0	0	0	0	0	0	0.018018	0.018018	0.018018	0.018018	0.018018	0.018018	0.018018	0.018018	0	0	0	0	0	0	0	0.000212058	0.000203789	0.000226039	0.000243907	0.000228082	0.000246394	0.000244907	0.000233419	0	0	0	0	0
540	Heat shock protein HSP 90-beta OS=Homo sapiens GN=HSP90AB1 PE=1 SV=4	HS90B_HUMAN	83	4.68	Homo sapiens	0	0	0	0	0	4	0	0	0	0	0	0	0	0	0	0	0	0	0	0	0.0481928	0	0	0	0	0	0	0	0	0	0	0	0	0	0	0.000610052	0	0	0	0	0	0	0	0
541	Destrin OS=Homo sapiens GN=DSTN PE=1 SV=3	DEST_HUMAN	19	7.97	Homo sapiens	0	0	0	0	0	0	0	0	0	0	0	0	0	0	0	0	0	0	0	0	0	0	0	0	0	0	0	0	0	0	0	0	0	0	0	0	0	0	0	0	0	0	0	0
542	LIM and SH3 domain protein 1 OS=Homo sapiens GN=LASP1 PE=1 SV=2	LASP1_HUMAN	30	7.07	Homo sapiens	0	0	0	0	0	0	0	0	0	0	0	0	0	0	0	0	0	0	0	0	0	0	0	0	0	0	0	0	0	0	0	0	0	0	0	0	0	0	0	0	0	0	0	0
543	Tissue factor pathway inhibitor OS=Homo sapiens GN=TFPI PE=1 SV=1	TFPI1_HUMAN	35	8.31	Homo sapiens	0	0	0	0	0	0	0	0	0	0	0	0	0	0	0	0	0	0	0	0	0	0	0	0	0	0	0	0	0	0	0	0	0	0	0	0	0	0	0	0	0	0	0	0
544	Phospholipase A2, membrane associated OS=Homo sapiens GN=PLA2G2A PE=1 SV=2	PA2GA_HUMAN	16	9.51	Homo sapiens	0	0	0	0	0	0	0	0	0	0	0	0	0	0	0	0	0	0	0	0	0	0	0	0	0	0	0	0	0	0	0	0	0	0	0	0	0	0	0	0	0	0	0	0
545	Glucose-6-phosphate isomerase OS=Homo sapiens GN=GPI PE=1 SV=4	G6PI_HUMAN	63	8.55	Homo sapiens	0	0	0	0	0	0	0	0	0	0	0	0	0	0	0	0	0	0	0	0	0	0	0	0	0	0	0	0	0	0	0	0	0	0	0	0	0	0	0	0	0	0	0	0
546	Serine/threonine-protein phosphatase PP1-beta catalytic subunit OS=Homo sapiens GN=PPP1CB PE=1 SV=3	PP1B_HUMAN	37	6.06	Homo sapiens	2	2	2	3	2	2	0	0	0	0	0	0	0	0	0	0.0540541	0.0540541	0.0540541	0.0810811	0.0540541	0.0540541	0	0	0	0	0	0	0	0	0	0.000691936	0.000636174	0.000611366	0.00101718	0.00073172	0.000684247	0	0	0	0	0	0	0	0
547	EH domain-containing protein 1 OS=Homo sapiens GN=EHD1 PE=1 SV=2	EHD1_HUMAN	61	6.81	Homo sapiens	0	0	3	0	0	0	0	0	0	0	0	0	0	0	0	0	0	0.0491803	0	0	0	0	0	0	0	0	0	0	0	0	0	0	0.000556243	0	0	0	0	0	0	0	0	0	0	0
548	Succinyl-CoA ligase [ADP-forming] subunit beta, mitochondrial OS=Homo sapiens GN=SUCLA2 PE=1 SV=3	SUCB1_HUMAN	50	7.5	Homo sapiens	2	3	3	0	2	2	0	0	0	0	0	0	0	0	0	0.04	0.06	0.06	0	0.04	0.04	0	0	0	0	0	0	0	0	0	0.000512032	0.000706153	0.000678617	0	0.000541473	0.000506343	0	0	0	0	0	0	0	0
549	Ig kappa chain V-II region GM607 (Fragment) OS=Homo sapiens PE=4 SV=1	KV205_HUMAN	13	7.25	Homo sapiens	0	0	0	0	0	0	0	0	0	0	0	0	0	0	0	0	0	0	0	0	0	0	0	0	0	0	0	0	0	0	0	0	0	0	0	0	0	0	0	0	0	0	0	0
550	Cadherin-1 OS=Homo sapiens GN=CDH1 PE=1 SV=3	CADH1_HUMAN	97	4.33	Homo sapiens	0	2	0	0	0	0	0	0	0	0	0	0	0	0	0	0	0.0206186	0	0	0	0	0	0	0	0	0	0	0	0	0	0	0.000242664	0	0	0	0	0	0	0	0	0	0	0	0
551	Receptor-type tyrosine-protein phosphatase C OS=Homo sapiens GN=PTPRC PE=1 SV=2	PTPRC_HUMAN	147	6.08	Homo sapiens	0	0	0	0	0	0	0	0	0	0	0	0	0	0	0	0	0	0	0	0	0	0	0	0	0	0	0	0	0	0	0	0	0	0	0	0	0	0	0	0	0	0	0	0
552	Minor histocompatibility protein HA-1 OS=Homo sapiens GN=HMHA1 PE=1 SV=2	HMHA1_HUMAN	125	6	Homo sapiens	0	0	0	0	0	0	0	0	0	0	0	0	0	0	0	0	0	0	0	0	0	0	0	0	0	0	0	0	0	0	0	0	0	0	0	0	0	0	0	0	0	0	0	0
553	Amyloid beta A4 protein OS=Homo sapiens GN=APP PE=1 SV=3	A4_HUMAN	87	4.45	Homo sapiens	0	0	0	2	0	0	2	0	0	0	0	0	0	0	0	0	0	0	0.0229885	0	0	0.0229885	0	0	0	0	0	0	0	0	0	0	0	0.000288395	0	0	0.000314365	0	0	0	0	0	0	0
554	Endothelial cell-selective adhesion molecule OS=Homo sapiens GN=ESAM PE=1 SV=1	ESAM_HUMAN	41	9.75	Homo sapiens	0	0	0	0	0	0	0	0	0	0	0	0	0	0	0	0	0	0	0	0	0	0	0	0	0	0	0	0	0	0	0	0	0	0	0	0	0	0	0	0	0	0	0	0
555	Superoxide dismutase [Cu-Zn] OS=Homo sapiens GN=SOD1 PE=1 SV=2	SODC_HUMAN	16	6.07	Homo sapiens	0	0	0	0	0	0	0	0	0	0	0	0	0	0	0	0	0	0	0	0	0	0	0	0	0	0	0	0	0	0	0	0	0	0	0	0	0	0	0	0	0	0	0	0
556	6-phosphofructokinase type C OS=Homo sapiens GN=PFKP PE=1 SV=2	K6PP_HUMAN	85	7.5	Homo sapiens	0	0	0	0	0	0	0	0	0	0	0	0	0	0	0	0	0	0	0	0	0	0	0	0	0	0	0	0	0	0	0	0	0	0	0	0	0	0	0	0	0	0	0	0
557	Macrophage migration inhibitory factor OS=Homo sapiens GN=MIF PE=1 SV=4	MIF_HUMAN	12	8.05	Homo sapiens	0	0	0	0	0	0	2	0	2	0	0	0	0	0	0	0	0	0	0	0	0	0.166667	0	0.166667	0	0	0	0	0	0	0	0	0	0	0	0	0.00227915	0	0.00215913	0	0	0	0	0
558	Transmembrane emp24 domain-containing protein 10 OS=Homo sapiens GN=TMED10 PE=1 SV=2	TMEDA_HUMAN	25	7.55	Homo sapiens	0	0	0	0	0	0	0	2	3	0	0	0	0	0	0	0	0	0	0	0	0	0	0.08	0.12	0	0	0	0	0	0	0	0	0	0	0	0	0	0.00108739	0.00155457	0	0	0	0	0
559	HLA class I histocompatibility antigen, A-24 alpha chain OS=Homo sapiens GN=HLA-A PE=1 SV=2	1A24_HUMAN	41	6.29	Homo sapiens	0	0	10	10	7	0	0	0	0	0	0	0	0	0	0	0	0	0.243902	0.243902	0.170732	0	0	0	0	0	0	0	0	0	0	0	0	0.0027586	0.0030598	0.00231116	0	0	0	0	0	0	0	0	0
560	Ig kappa chain V-I region AG OS=Homo sapiens PE=1 SV=1	KV101_HUMAN	12	5.77	Homo sapiens	0	0	0	0	0	0	0	0	0	0	0	0	0	0	0	0	0	0	0	0	0	0	0	0	0	0	0	0	0	0	0	0	0	0	0	0	0	0	0	0	0	0	0	0
561	Syntaxin-7 OS=Homo sapiens GN=STX7 PE=1 SV=4	STX7_HUMAN	30	5.24	Homo sapiens	0	0	0	0	0	0	0	0	0	0	0	0	0	0	0	0	0	0	0	0	0	0	0	0	0	0	0	0	0	0	0	0	0	0	0	0	0	0	0	0	0	0	0	0
562	Transaldolase OS=Homo sapiens GN=TALDO1 PE=1 SV=2	TALDO_HUMAN	38	6.8	Homo sapiens	0	0	0	0	0	0	0	0	0	0	0	0	0	0	0	0	0	0	0	0	0	0	0	0	0	0	0	0	0	0	0	0	0	0	0	0	0	0	0	0	0	0	0	0
563	Torsin-4A OS=Homo sapiens GN=TOR4A PE=1 SV=2	TOR4A_HUMAN	47	10.42	Homo sapiens	0	0	0	0	0	0	0	0	0	0	0	0	0	0	0	0	0	0	0	0	0	0	0	0	0	0	0	0	0	0	0	0	0	0	0	0	0	0	0	0	0	0	0	0
564	Histone H1.5 OS=Homo sapiens GN=HIST1H1B PE=1 SV=3	H15_HUMAN	23	11.69	Homo sapiens	0	0	0	0	0	0	0	0	0	0	0	0	0	0	0	0	0	0	0	0	0	0	0	0	0	0	0	0	0	0	0	0	0	0	0	0	0	0	0	0	0	0	0	0
565	Pantetheinase OS=Homo sapiens GN=VNN1 PE=1 SV=2	VNN1_HUMAN	57	5.26	Homo sapiens	0	0	0	0	0	0	0	0	0	0	0	0	0	0	0	0	0	0	0	0	0	0	0	0	0	0	0	0	0	0	0	0	0	0	0	0	0	0	0	0	0	0	0	0
566	Transmembrane protein 40 OS=Homo sapiens GN=TMEM40 PE=1 SV=2	TMM40_HUMAN	25	5.32	Homo sapiens	0	0	0	0	0	0	0	0	2	0	0	0	0	0	0	0	0	0	0	0	0	0	0	0.08	0	0	0	0	0	0	0	0	0	0	0	0	0	0	0.00103638	0	0	0	0	0
567	Leucine-rich repeat flightless-interacting protein 2 OS=Homo sapiens GN=LRRFIP2 PE=1 SV=1	LRRF2_HUMAN	82	6.94	Homo sapiens	2	3	0	0	0	2	0	0	0	0	0	0	0	0	0	0.0243902	0.0365854	0	0	0	0.0243902	0	0	0	0	0	0	0	0	0	0.000312215	0.000430581	0	0	0	0.000308746	0	0	0	0	0	0	0	0
568	High affinity immunoglobulin epsilon receptor subunit gamma OS=Homo sapiens GN=FCER1G PE=1 SV=1	FCERG_HUMAN	10	7.25	Homo sapiens	0	0	0	0	0	0	0	0	0	0	0	0	0	0	0	0	0	0	0	0	0	0	0	0	0	0	0	0	0	0	0	0	0	0	0	0	0	0	0	0	0	0	0	0
569	Tubulin alpha-1A chain OS=Homo sapiens GN=TUBA1A PE=1 SV=1	TBA1A_HUMAN	50	4.7	Homo sapiens	0	0	0	0	13	15	0	0	0	0	0	0	0	0	0	0	0	0	0	0.26	0.3	0	0	0	0	0	0	0	0	0	0	0	0	0	0.00351957	0.00379757	0	0	0	0	0	0	0	0
570	Importin subunit beta-1 OS=Homo sapiens GN=KPNB1 PE=1 SV=2	IMB1_HUMAN	97	4.41	Homo sapiens	0	2	2	0	0	0	0	0	2	0	0	0	0	0	0	0	0.0206186	0.0206186	0	0	0	0	0	0.0206186	0	0	0	0	0	0	0	0.000242664	0.000233202	0	0	0	0	0	0.000267108	0	0	0	0	0
571	Pituitary tumor-transforming gene 1 protein-interacting protein OS=Homo sapiens GN=PTTG1IP PE=1 SV=1	PTTG_HUMAN	20	8.89	Homo sapiens	0	0	0	0	0	0	2	2	0	0	0	0	0	0	0	0	0	0	0	0	0	0.1	0.1	0	0	0	0	0	0	0	0	0	0	0	0	0	0.00136749	0.00135924	0	0	0	0	0	0
572	Annexin A7 OS=Homo sapiens GN=ANXA7 PE=1 SV=3	ANXA7_HUMAN	53	5.32	Homo sapiens	0	0	0	0	0	0	0	0	0	0	0	0	0	0	0	0	0	0	0	0	0	0	0	0	0	0	0	0	0	0	0	0	0	0	0	0	0	0	0	0	0	0	0	0
573	Fatty acid-binding protein, epidermal OS=Homo sapiens GN=FABP5 PE=1 SV=3	FABP5_HUMAN	15	7.05	Homo sapiens	0	0	0	0	0	0	0	0	0	2	0	0	0	0	0	0	0	0	0	0	0	0	0	0	0.133333	0	0	0	0	0	0	0	0	0	0	0	0	0	0	0.00177559	0	0	0	0
574	Methyltransferase-like protein 7A OS=Homo sapiens GN=METTL7A PE=1 SV=1	MET7A_HUMAN	28	8.47	Homo sapiens	0	0	0	0	0	0	0	0	0	0	0	0	0	0	0	0	0	0	0	0	0	0	0	0	0	0	0	0	0	0	0	0	0	0	0	0	0	0	0	0	0	0	0	0
575	Protein disulfide-isomerase A4 OS=Homo sapiens GN=PDIA4 PE=1 SV=2	PDIA4_HUMAN	73	4.7	Homo sapiens	0	0	2	0	0	0	2	0	0	0	0	0	0	0	0	0	0	0.0273973	0	0	0	0.0273973	0	0	0	0	0	0	0	0	0	0	0.000309871	0	0	0	0.000374654	0	0	0	0	0	0	0
576	Rab GDP dissociation inhibitor alpha OS=Homo sapiens GN=GDI1 PE=1 SV=2	GDIA_HUMAN	51	4.75	Homo sapiens	0	0	0	0	2	0	0	0	0	0	0	0	0	0	0	0	0	0	0	0.0392157	0	0	0	0	0	0	0	0	0	0	0	0	0	0	0.000530856	0	0	0	0	0	0	0	0	0
577	Dehydrogenase/reductase SDR family member 7 OS=Homo sapiens GN=DHRS7 PE=1 SV=1	DHRS7_HUMAN	38	8.47	Homo sapiens	0	0	2	0	0	0	0	0	0	0	0	0	0	0	0	0	0	0.0526316	0	0	0	0	0	0	0	0	0	0	0	0	0	0	0.000595278	0	0	0	0	0	0	0	0	0	0	0
578	Cathepsin G OS=Homo sapiens GN=CTSG PE=1 SV=2	CATG_HUMAN	29	11.69	Homo sapiens	0	0	0	0	0	0	0	0	0	0	0	0	0	0	0	0	0	0	0	0	0	0	0	0	0	0	0	0	0	0	0	0	0	0	0	0	0	0	0	0	0	0	0	0
579	Cytochrome c oxidase subunit 4 isoform 1, mitochondrial OS=Homo sapiens GN=COX4I1 PE=1 SV=1	COX41_HUMAN	20	10.12	Homo sapiens	0	0	0	0	0	0	0	0	0	0	0	0	0	0	0	0	0	0	0	0	0	0	0	0	0	0	0	0	0	0	0	0	0	0	0	0	0	0	0	0	0	0	0	0
580	Lipopolysaccharide-responsive and beige-like anchor protein OS=Homo sapiens GN=LRBA PE=1 SV=4	LRBA_HUMAN	319	5.31	Homo sapiens	0	2	0	0	0	0	0	0	0	0	0	0	0	0	0	0	0.00626959	0	0	0	0	0	0	0	0	0	0	0	0	0	0	7.37882e-05	0	0	0	0	0	0	0	0	0	0	0	0
581	Leucine-rich repeat-containing protein 59 OS=Homo sapiens GN=LRRC59 PE=1 SV=1	LRC59_HUMAN	35	10.29	Homo sapiens	0	0	0	0	2	0	0	0	0	0	0	0	0	0	0	0	0	0	0	0.0571429	0	0	0	0	0	0	0	0	0	0	0	0	0	0	0.000773532	0	0	0	0	0	0	0	0	0
582	Elongation factor 1-gamma OS=Homo sapiens GN=EEF1G PE=1 SV=3	EF1G_HUMAN	50	6.64	Homo sapiens	0	2	2	2	3	0	0	0	0	0	0	0	0	0	0	0	0.04	0.04	0.04	0.06	0	0	0	0	0	0	0	0	0	0	0	0.000470769	0.000452411	0.000501807	0.000812209	0	0	0	0	0	0	0	0	0
583	Endoplasmic reticulum resident protein 44 OS=Homo sapiens GN=ERP44 PE=1 SV=1	ERP44_HUMAN	47	4.9	Homo sapiens	0	0	3	0	0	0	0	0	0	0	0	0	0	0	0	0	0	0.0638298	0	0	0	0	0	0	0	0	0	0	0	0	0	0	0.000721933	0	0	0	0	0	0	0	0	0	0	0
584	SLAM family member 5 OS=Homo sapiens GN=CD84 PE=1 SV=1	SLAF5_HUMAN	39	7.08	Homo sapiens	0	0	0	0	0	0	0	0	0	0	0	0	0	0	0	0	0	0	0	0	0	0	0	0	0	0	0	0	0	0	0	0	0	0	0	0	0	0	0	0	0	0	0	0
585	Flotillin-2 OS=Homo sapiens GN=FLOT2 PE=1 SV=2	FLOT2_HUMAN	47	4.91	Homo sapiens	2	0	0	0	0	0	0	0	0	0	0	0	0	0	0	0.0425532	0	0	0	0	0	0	0	0	0	0	0	0	0	0	0.000544715	0	0	0	0	0	0	0	0	0	0	0	0	0
586	Sodium/potassium-transporting ATPase subunit alpha-1 OS=Homo sapiens GN=ATP1A1 PE=1 SV=1	AT1A1_HUMAN	113	5.15	Homo sapiens	0	0	0	0	0	0	0	0	0	0	0	0	0	0	0	0	0	0	0	0	0	0	0	0	0	0	0	0	0	0	0	0	0	0	0	0	0	0	0	0	0	0	0	0
587	Collagen alpha-1(VI) chain OS=Homo sapiens GN=COL6A1 PE=1 SV=3	CO6A1_HUMAN	109	5.05	Homo sapiens	0	0	0	0	0	0	0	0	0	0	0	0	0	0	0	0	0	0	0	0	0	0	0	0	0	0	0	0	0	0	0	0	0	0	0	0	0	0	0	0	0	0	0	0
588	Keratin, type II cuticular Hb4 OS=Homo sapiens GN=KRT84 PE=2 SV=2	KRT84_HUMAN	65	7.61	Homo sapiens	0	0	0	0	0	0	0	0	0	0	0	0	0	0	0	0	0	0	0	0	0	0	0	0	0	0	0	0	0	0	0	0	0	0	0	0	0	0	0	0	0	0	0	0
589	Elongation factor 1-delta OS=Homo sapiens GN=EEF1D PE=1 SV=5	EF1D_HUMAN	31	4.63	Homo sapiens	2	2	0	0	0	0	0	0	0	0	0	0	0	0	0	0.0645161	0.0645161	0	0	0	0	0	0	0	0	0	0	0	0	0	0.000825859	0.000759304	0	0	0	0	0	0	0	0	0	0	0	0
590	Ubiquitin-60S ribosomal protein L40 OS=Homo sapiens GN=UBA52 PE=1 SV=2	RL40_HUMAN	15	10.51	Homo sapiens	0	0	0	0	0	0	0	0	0	0	0	0	0	0	0	0	0	0	0	0	0	0	0	0	0	0	0	0	0	0	0	0	0	0	0	0	0	0	0	0	0	0	0	0
591	Membrane-associated progesterone receptor component 1 OS=Homo sapiens GN=PGRMC1 PE=1 SV=3	PGRC1_HUMAN	22	4.3	Homo sapiens	0	0	0	0	0	0	0	0	0	0	0	0	0	0	0	0	0	0	0	0	0	0	0	0	0	0	0	0	0	0	0	0	0	0	0	0	0	0	0	0	0	0	0	0
592	Glucose-6-phosphate 1-dehydrogenase OS=Homo sapiens GN=G6PD PE=1 SV=4	G6PD_HUMAN	59	6.84	Homo sapiens	0	0	0	0	0	0	2	0	0	0	0	0	0	0	0	0	0	0	0	0	0	0.0338983	0	0	0	0	0	0	0	0	0	0	0	0	0	0	0.000463555	0	0	0	0	0	0	0
593	P2X purinoceptor 1 OS=Homo sapiens GN=P2RX1 PE=1 SV=1	P2RX1_HUMAN	45	8.59	Homo sapiens	0	0	0	0	0	0	0	0	0	0	0	0	0	0	0	0	0	0	0	0	0	0	0	0	0	0	0	0	0	0	0	0	0	0	0	0	0	0	0	0	0	0	0	0
594	Dynein light chain 1, cytoplasmic OS=Homo sapiens GN=DYNLL1 PE=1 SV=1	DYL1_HUMAN	10	7.5	Homo sapiens	0	0	0	0	0	0	0	0	0	0	0	0	0	0	0	0	0	0	0	0	0	0	0	0	0	0	0	0	0	0	0	0	0	0	0	0	0	0	0	0	0	0	0	0
595	Tripeptidyl-peptidase 1 OS=Homo sapiens GN=TPP1 PE=1 SV=2	TPP1_HUMAN	61	6.46	Homo sapiens	0	0	0	0	0	0	2	2	2	0	0	0	0	0	0	0	0	0	0	0	0	0.0327869	0.0327869	0.0327869	0	0	0	0	0	0	0	0	0	0	0	0	0.000448356	0.000445651	0.000424746	0	0	0	0	0
596	Azurocidin OS=Homo sapiens GN=AZU1 PE=1 SV=3	CAP7_HUMAN	27	9.65	Homo sapiens	0	0	0	0	0	0	0	0	0	0	0	0	0	0	0	0	0	0	0	0	0	0	0	0	0	0	0	0	0	0	0	0	0	0	0	0	0	0	0	0	0	0	0	0
597	Extended synaptotagmin-2 OS=Homo sapiens GN=ESYT2 PE=1 SV=1	ESYT2_HUMAN	102	9.8	Homo sapiens	2	0	2	0	0	0	0	0	0	0	0	0	0	0	0	0.0196078	0	0.0196078	0	0	0	0	0	0	0	0	0	0	0	0	0.000250996	0	0.00022177	0	0	0	0	0	0	0	0	0	0	0
598	Succinyl-CoA:3-ketoacid coenzyme A transferase 1, mitochondrial OS=Homo sapiens GN=OXCT1 PE=1 SV=1	SCOT1_HUMAN	56	7.52	Homo sapiens	0	0	0	0	2	0	0	0	0	0	0	0	0	0	0	0	0	0	0	0.0357143	0	0	0	0	0	0	0	0	0	0	0	0	0	0	0.000483458	0	0	0	0	0	0	0	0	0
599	Reelin OS=Homo sapiens GN=RELN PE=1 SV=3	RELN_HUMAN	388	5.74	Homo sapiens	0	0	0	0	0	0	0	0	0	0	0	0	0	0	0	0	0	0	0	0	0	0	0	0	0	0	0	0	0	0	0	0	0	0	0	0	0	0	0	0	0	0	0	0
600	Nidogen-1 OS=Homo sapiens GN=NID1 PE=1 SV=3	NID1_HUMAN	136	4.93	Homo sapiens	0	0	0	0	0	0	0	0	2	0	0	0	0	0	0	0	0	0	0	0	0	0	0	0.0147059	0	0	0	0	0	0	0	0	0	0	0	0	0	0	0.000190511	0	0	0	0	0
601	Cytoskeleton-associated protein 5 OS=Homo sapiens GN=CKAP5 PE=1 SV=3	CKAP5_HUMAN	226	7.88	Homo sapiens	0	0	0	0	0	0	0	0	0	0	0	0	0	0	0	0	0	0	0	0	0	0	0	0	0	0	0	0	0	0	0	0	0	0	0	0	0	0	0	0	0	0	0	0
602	Insulin-like growth factor II OS=Homo sapiens GN=IGF2 PE=1 SV=1	IGF2_HUMAN	20	9.61	Homo sapiens	0	0	0	0	0	0	0	0	0	0	0	0	0	0	0	0	0	0	0	0	0	0	0	0	0	0	0	0	0	0	0	0	0	0	0	0	0	0	0	0	0	0	0	0
603	55 kDa erythrocyte membrane protein OS=Homo sapiens GN=MPP1 PE=1 SV=2	EM55_HUMAN	52	7.42	Homo sapiens	0	0	0	0	0	0	0	2	0	0	0	0	0	0	0	0	0	0	0	0	0	0	0.0384615	0	0	0	0	0	0	0	0	0	0	0	0	0	0	0.000522783	0	0	0	0	0	0
604	Ig lambda-7 chain C region OS=Homo sapiens GN=IGLC7 PE=4 SV=2	LAC7_HUMAN	11	8.48	Homo sapiens	0	0	0	0	0	0	0	0	0	0	0	0	0	0	0	0	0	0	0	0	0	0	0	0	0	0	0	0	0	0	0	0	0	0	0	0	0	0	0	0	0	0	0	0
605	Protein flightless-1 homolog OS=Homo sapiens GN=FLII PE=1 SV=2	FLII_HUMAN	145	5.91	Homo sapiens	0	0	0	0	2	0	0	0	0	0	0	0	0	0	0	0	0	0	0	0.0137931	0	0	0	0	0	0	0	0	0	0	0	0	0	0	0.000186715	0	0	0	0	0	0	0	0	0
606	Glutamate dehydrogenase 1, mitochondrial OS=Homo sapiens GN=GLUD1 PE=1 SV=2	DHE3_HUMAN (+1)	61	7.91	Homo sapiens	0	2	2	0	2	2	0	0	0	0	0	0	0	0	0	0	0.0327869	0.0327869	0	0.0327869	0.0327869	0	0	0	0	0	0	0	0	0	0	0.000385876	0.000370829	0	0.00044383	0.000415035	0	0	0	0	0	0	0	0
607	PRA1 family protein 3 OS=Homo sapiens GN=ARL6IP5 PE=1 SV=1	PRAF3_HUMAN	22	10.28	Homo sapiens	0	0	0	0	0	0	0	0	0	0	0	0	0	0	0	0	0	0	0	0	0	0	0	0	0	0	0	0	0	0	0	0	0	0	0	0	0	0	0	0	0	0	0	0
608	Alpha-1,3-mannosyl-glycoprotein 2-beta-N-acetylglucosaminyltransferase OS=Homo sapiens GN=MGAT1 PE=1 SV=2	MGAT1_HUMAN	51	9.49	Homo sapiens	0	2	0	0	0	0	0	0	0	0	0	0	0	0	0	0	0.0392157	0	0	0	0	0	0	0	0	0	0	0	0	0	0	0.000461538	0	0	0	0	0	0	0	0	0	0	0	0
609	Mitochondrial inner membrane protein OS=Homo sapiens GN=IMMT PE=1 SV=1	IMMT_HUMAN	84	6.08	Homo sapiens	0	0	0	0	0	0	0	0	0	0	0	0	0	0	0	0	0	0	0	0	0	0	0	0	0	0	0	0	0	0	0	0	0	0	0	0	0	0	0	0	0	0	0	0
610	C-type lectin domain family 1 member B OS=Homo sapiens GN=CLEC1B PE=1 SV=2	CLC1B_HUMAN	27	8.62	Homo sapiens	0	0	0	0	0	0	0	0	0	0	0	0	0	0	0	0	0	0	0	0	0	0	0	0	0	0	0	0	0	0	0	0	0	0	0	0	0	0	0	0	0	0	0	0
611	Glutathione S-transferase P OS=Homo sapiens GN=GSTP1 PE=1 SV=2	GSTP1_HUMAN	23	5.3	Homo sapiens	0	2	2	2	0	0	0	0	0	0	0	0	0	0	0	0	0.0869565	0.0869565	0.0869565	0	0	0	0	0	0	0	0	0	0	0	0	0.00102341	0.000983502	0.00109089	0	0	0	0	0	0	0	0	0	0
612	Myotrophin OS=Homo sapiens GN=MTPN PE=1 SV=2	MTPN_HUMAN	13	5.18	Homo sapiens	0	0	0	0	0	0	0	2	0	0	0	0	0	0	0	0	0	0	0	0	0	0	0.153846	0	0	0	0	0	0	0	0	0	0	0	0	0	0	0.00209113	0	0	0	0	0	0
613	Cytochrome c OS=Homo sapiens GN=CYCS PE=1 SV=2	CYC_HUMAN	12	10.16	Homo sapiens	2	2	2	0	0	0	2	0	0	0	0	0	0	0	0	0.166667	0.166667	0.166667	0	0	0	0.166667	0	0	0	0	0	0	0	0	0.00213347	0.00196154	0.00188505	0	0	0	0.00227915	0	0	0	0	0	0	0
614	Dihydrolipoyllysine-residue succinyltransferase component of 2-oxoglutarate dehydrogenase complex, mitochondrial OS=Homo sapiens GN=DLST PE=1 SV=4	ODO2_HUMAN	49	9.39	Homo sapiens	0	0	0	0	2	0	0	2	0	0	0	0	0	0	0	0	0	0	0	0.0408163	0	0	0.0408163	0	0	0	0	0	0	0	0	0	0	0	0.000552523	0	0	0.00055479	0	0	0	0	0	0
615	Intelectin-1 OS=Homo sapiens GN=ITLN1 PE=1 SV=1	ITLN1_HUMAN	35	5.66	Homo sapiens	0	0	0	0	0	0	0	0	0	0	0	0	0	0	0	0	0	0	0	0	0	0	0	0	0	0	0	0	0	0	0	0	0	0	0	0	0	0	0	0	0	0	0	0
616	Vesicle-associated membrane protein-associated protein A OS=Homo sapiens GN=VAPA PE=1 SV=3	VAPA_HUMAN	28	8.93	Homo sapiens	0	2	0	0	0	0	0	0	0	0	0	0	0	0	0	0	0.0714286	0	0	0	0	0	0	0	0	0	0	0	0	0	0	0.000840658	0	0	0	0	0	0	0	0	0	0	0	0
617	Keratin, type II cuticular Hb3 OS=Homo sapiens GN=KRT83 PE=1 SV=2	KRT83_HUMAN	54	5.35	Homo sapiens	0	0	0	0	0	0	0	0	0	0	0	0	0	0	0	0	0	0	0	0	0	0	0	0	0	0	0	0	0	0	0	0	0	0	0	0	0	0	0	0	0	0	0	0
618	Reticulon-3 OS=Homo sapiens GN=RTN3 PE=1 SV=2	RTN3_HUMAN	113	4.58	Homo sapiens	0	0	0	0	0	0	0	0	0	0	0	0	0	0	0	0	0	0	0	0	0	0	0	0	0	0	0	0	0	0	0	0	0	0	0	0	0	0	0	0	0	0	0	0
619	Tight junction protein ZO-2 OS=Homo sapiens GN=TJP2 PE=1 SV=2	ZO2_HUMAN	134	7.43	Homo sapiens	0	0	0	0	0	0	0	0	0	0	0	0	0	0	0	0	0	0	0	0	0	0	0	0	0	0	0	0	0	0	0	0	0	0	0	0	0	0	0	0	0	0	0	0
620	Ras-related protein Rab-21 OS=Homo sapiens GN=RAB21 PE=1 SV=3	RAB21_HUMAN	24	8.05	Homo sapiens	0	0	0	0	0	0	0	0	0	0	0	0	0	0	0	0	0	0	0	0	0	0	0	0	0	0	0	0	0	0	0	0	0	0	0	0	0	0	0	0	0	0	0	0
621	Fibrinogen-like protein 1 OS=Homo sapiens GN=FGL1 PE=1 SV=3	FGL1_HUMAN	36	5.67	Homo sapiens	0	0	0	0	0	0	0	0	0	0	0	0	0	0	0	0	0	0	0	0	0	0	0	0	0	0	0	0	0	0	0	0	0	0	0	0	0	0	0	0	0	0	0	0
622	T-complex protein 1 subunit zeta OS=Homo sapiens GN=CCT6A PE=1 SV=3	TCPZ_HUMAN	58	6.65	Homo sapiens	0	2	3	0	0	0	0	0	0	0	0	0	0	0	0	0	0.0344828	0.0517241	0	0	0	0	0	0	0	0	0	0	0	0	0	0.000405835	0.000585014	0	0	0	0	0	0	0	0	0	0	0
623	Cytochrome c oxidase subunit 6B1 OS=Homo sapiens GN=COX6B1 PE=1 SV=2	CX6B1_HUMAN	10	7.13	Homo sapiens	0	0	0	0	0	0	0	0	0	0	0	0	0	0	0	0	0	0	0	0	0	0	0	0	0	0	0	0	0	0	0	0	0	0	0	0	0	0	0	0	0	0	0	0
624	Disheveled-associated activator of morphogenesis 1 OS=Homo sapiens GN=DAAM1 PE=1 SV=2	DAAM1_HUMAN	123	7.24	Homo sapiens	0	0	0	0	2	0	0	0	0	0	0	0	0	0	0	0	0	0	0	0.0162602	0	0	0	0	0	0	0	0	0	0	0	0	0	0	0.000220111	0	0	0	0	0	0	0	0	0
625	Emerin OS=Homo sapiens GN=EMD PE=1 SV=1	EMD_HUMAN	29	5.17	Homo sapiens	0	0	0	0	0	0	0	0	0	0	0	0	0	0	0	0	0	0	0	0	0	0	0	0	0	0	0	0	0	0	0	0	0	0	0	0	0	0	0	0	0	0	0	0
626	Aspartate aminotransferase, mitochondrial OS=Homo sapiens GN=GOT2 PE=1 SV=3	AATM_HUMAN	48	9.38	Homo sapiens	0	0	0	0	0	0	0	0	2	0	0	0	0	0	0	0	0	0	0	0	0	0	0	0.0416667	0	0	0	0	0	0	0	0	0	0	0	0	0	0	0.000539781	0	0	0	0	0
627	Olfactomedin-4 OS=Homo sapiens GN=OLFM4 PE=1 SV=1	OLFM4_HUMAN	57	5.37	Homo sapiens	0	0	0	0	0	0	0	0	0	0	0	0	0	0	0	0	0	0	0	0	0	0	0	0	0	0	0	0	0	0	0	0	0	0	0	0	0	0	0	0	0	0	0	0
628	Transmembrane protein 109 OS=Homo sapiens GN=TMEM109 PE=1 SV=1	TM109_HUMAN	26	11.09	Homo sapiens	0	0	0	0	0	0	0	2	0	0	0	0	0	0	0	0	0	0	0	0	0	0	0.0769231	0	0	0	0	0	0	0	0	0	0	0	0	0	0	0.00104557	0	0	0	0	0	0
629	Barrier-to-autointegration factor OS=Homo sapiens GN=BANF1 PE=1 SV=1	BAF_HUMAN	10	5.88	Homo sapiens	0	0	0	0	0	0	0	0	0	0	0	0	0	0	0	0	0	0	0	0	0	0	0	0	0	0	0	0	0	0	0	0	0	0	0	0	0	0	0	0	0	0	0	0
630	Tripeptidyl-peptidase 2 OS=Homo sapiens GN=TPP2 PE=1 SV=4	TPP2_HUMAN	138	6.27	Homo sapiens	2	2	2	0	0	0	0	0	0	0	0	0	0	0	0	0.0144928	0.0144928	0.0144928	0	0	0	0	0	0	0	0	0	0	0	0	0.000185519	0.000170568	0.000163917	0	0	0	0	0	0	0	0	0	0	0
631	Nucleoside diphosphate kinase B OS=Homo sapiens GN=NME2 PE=1 SV=1	NDKB_HUMAN	17	8.69	Homo sapiens	0	0	0	0	0	0	0	3	0	0	0	0	0	0	0	0	0	0	0	0	0	0	0.176471	0	0	0	0	0	0	0	0	0	0	0	0	0	0	0.00239865	0	0	0	0	0	0
632	Ras-related protein Rab-1A OS=Homo sapiens GN=RAB1A PE=1 SV=3	RAB1A_HUMAN	23	6	Homo sapiens	0	0	0	0	0	0	0	0	4	0	0	0	0	0	0	0	0	0	0	0	0	0	0	0.173913	0	0	0	0	0	0	0	0	0	0	0	0	0	0	0.002253	0	0	0	0	0
633	FH1/FH2 domain-containing protein 1 OS=Homo sapiens GN=FHOD1 PE=1 SV=3	FHOD1_HUMAN	127	6.33	Homo sapiens	0	0	0	0	0	0	0	0	0	0	0	0	0	0	0	0	0	0	0	0	0	0	0	0	0	0	0	0	0	0	0	0	0	0	0	0	0	0	0	0	0	0	0	0
634	Angiopoietin-related protein 3 OS=Homo sapiens GN=ANGPTL3 PE=1 SV=1	ANGL3_HUMAN	54	6.68	Homo sapiens	0	0	0	0	0	0	0	0	0	0	0	0	0	0	0	0	0	0	0	0	0	0	0	0	0	0	0	0	0	0	0	0	0	0	0	0	0	0	0	0	0	0	0	0
635	ADP-ribosylation factor-like protein 8B OS=Homo sapiens GN=ARL8B PE=1 SV=1	ARL8B_HUMAN	22	8.62	Homo sapiens	0	0	2	0	0	0	0	0	0	0	0	0	0	0	0	0	0	0.0909091	0	0	0	0	0	0	0	0	0	0	0	0	0	0	0.00102821	0	0	0	0	0	0	0	0	0	0	0
636	Coagulation factor VII OS=Homo sapiens GN=F7 PE=1 SV=1	FA7_HUMAN	52	7.23	Homo sapiens	0	0	0	0	0	0	0	0	0	0	0	0	0	0	0	0	0	0	0	0	0	0	0	0	0	0	0	0	0	0	0	0	0	0	0	0	0	0	0	0	0	0	0	0
637	Syntaxin-4 OS=Homo sapiens GN=STX4 PE=1 SV=2	STX4_HUMAN	34	6.2	Homo sapiens	0	0	0	0	0	0	0	0	0	0	0	0	0	0	0	0	0	0	0	0	0	0	0	0	0	0	0	0	0	0	0	0	0	0	0	0	0	0	0	0	0	0	0	0
638	Mannan-binding lectin serine protease 2 OS=Homo sapiens GN=MASP2 PE=1 SV=4	MASP2_HUMAN	76	5.37	Homo sapiens	0	0	0	0	0	0	0	0	0	0	0	0	0	0	0	0	0	0	0	0	0	0	0	0	0	0	0	0	0	0	0	0	0	0	0	0	0	0	0	0	0	0	0	0
639	Angiopoietin-related protein 6 OS=Homo sapiens GN=ANGPTL6 PE=1 SV=1	ANGL6_HUMAN	52	8.64	Homo sapiens	0	0	0	0	0	0	0	0	0	0	0	0	0	0	0	0	0	0	0	0	0	0	0	0	0	0	0	0	0	0	0	0	0	0	0	0	0	0	0	0	0	0	0	0
640	Annexin A5 OS=Homo sapiens GN=ANXA5 PE=1 SV=2	ANXA5_HUMAN	36	4.66	Homo sapiens	0	0	0	0	0	0	0	0	0	0	0	0	0	0	0	0	0	0	0	0	0	0	0	0	0	0	0	0	0	0	0	0	0	0	0	0	0	0	0	0	0	0	0	0
641	Ras-related protein Rab-32 OS=Homo sapiens GN=RAB32 PE=1 SV=3	RAB32_HUMAN	25	6.51	Homo sapiens	0	0	0	0	0	0	0	0	0	0	0	0	0	0	0	0	0	0	0	0	0	0	0	0	0	0	0	0	0	0	0	0	0	0	0	0	0	0	0	0	0	0	0	0
642	E3 ubiquitin-protein ligase TRIM58 OS=Homo sapiens GN=TRIM58 PE=2 SV=2	TRI58_HUMAN	55	6.09	Homo sapiens	0	2	2	0	0	0	0	2	2	0	0	0	0	0	0	0	0.0363636	0.0363636	0	0	0	0	0.0363636	0.0363636	0	0	0	0	0	0	0	0.000427971	0.000411283	0	0	0	0	0.000494268	0.000471082	0	0	0	0	0
643	Versican core protein OS=Homo sapiens GN=VCAN PE=1 SV=3	CSPG2_HUMAN	373	4.15	Homo sapiens	0	0	0	0	0	0	0	0	0	0	0	0	0	0	0	0	0	0	0	0	0	0	0	0	0	0	0	0	0	0	0	0	0	0	0	0	0	0	0	0	0	0	0	0
644	Calcium-transporting ATPase type 2C member 1 OS=Homo sapiens GN=ATP2C1 PE=1 SV=3	AT2C1_HUMAN	101	6.72	Homo sapiens	0	0	2	0	0	0	0	0	0	0	0	0	0	0	0	0	0	0.019802	0	0	0	0	0	0	0	0	0	0	0	0	0	0	0.000223966	0	0	0	0	0	0	0	0	0	0	0
645	Flavin reductase (NADPH) OS=Homo sapiens GN=BLVRB PE=1 SV=3	BLVRB_HUMAN	22	7.76	Homo sapiens	0	0	0	0	0	0	0	0	0	0	0	0	0	0	0	0	0	0	0	0	0	0	0	0	0	0	0	0	0	0	0	0	0	0	0	0	0	0	0	0	0	0	0	0
646	Transferrin receptor protein 1 OS=Homo sapiens GN=TFRC PE=1 SV=2	TFR1_HUMAN	85	6.58	Homo sapiens	0	0	0	0	0	0	0	0	0	0	0	0	0	0	0	0	0	0	0	0	0	0	0	0	0	0	0	0	0	0	0	0	0	0	0	0	0	0	0	0	0	0	0	0
647	Spectrin beta chain, non-erythrocytic 1 OS=Homo sapiens GN=SPTBN1 PE=1 SV=2	SPTB2_HUMAN	275	5.26	Homo sapiens	2	0	0	0	0	3	0	0	0	0	0	0	0	0	0	0.00727273	0	0	0	0	0.0109091	0	0	0	0	0	0	0	0	0	9.30968e-05	0	0	0	0	0.000138094	0	0	0	0	0	0	0	0
648	Sorcin OS=Homo sapiens GN=SRI PE=1 SV=1	SORCN_HUMAN	22	5.2	Homo sapiens	0	0	0	0	0	0	0	0	0	0	0	0	0	0	0	0	0	0	0	0	0	0	0	0	0	0	0	0	0	0	0	0	0	0	0	0	0	0	0	0	0	0	0	0
649	Transmembrane emp24 domain-containing protein 9 OS=Homo sapiens GN=TMED9 PE=1 SV=2	TMED9_HUMAN	27	8.23	Homo sapiens	0	0	0	0	0	0	0	0	0	0	0	0	0	0	0	0	0	0	0	0	0	0	0	0	0	0	0	0	0	0	0	0	0	0	0	0	0	0	0	0	0	0	0	0
650	Vesicular integral-membrane protein VIP36 OS=Homo sapiens GN=LMAN2 PE=1 SV=1	LMAN2_HUMAN	40	6.95	Homo sapiens	0	0	0	0	0	0	0	0	0	0	0	0	0	0	0	0	0	0	0	0	0	0	0	0	0	0	0	0	0	0	0	0	0	0	0	0	0	0	0	0	0	0	0	0
651	Serine/threonine-protein kinase 24 OS=Homo sapiens GN=STK24 PE=1 SV=1	STK24_HUMAN	49	5.41	Homo sapiens	0	0	0	0	0	0	0	0	0	0	0	0	0	0	0	0	0	0	0	0	0	0	0	0	0	0	0	0	0	0	0	0	0	0	0	0	0	0	0	0	0	0	0	0
652	Plectin OS=Homo sapiens GN=PLEC PE=1 SV=3	PLEC_HUMAN	532	5.76	Homo sapiens	0	0	0	0	0	0	0	0	0	0	0	0	0	0	0	0	0	0	0	0	0	0	0	0	0	0	0	0	0	0	0	0	0	0	0	0	0	0	0	0	0	0	0	0
653	Bactericidal permeability-increasing protein OS=Homo sapiens GN=BPI PE=1 SV=4	BPI_HUMAN	54	9.89	Homo sapiens	0	0	0	0	0	0	0	0	0	0	0	0	0	0	0	0	0	0	0	0	0	0	0	0	0	0	0	0	0	0	0	0	0	0	0	0	0	0	0	0	0	0	0	0
654	Tapasin OS=Homo sapiens GN=TAPBP PE=1 SV=1	TPSN_HUMAN	48	7.17	Homo sapiens	0	0	0	0	0	2	0	0	0	0	0	0	0	0	0	0	0	0	0	0	0.0416667	0	0	0	0	0	0	0	0	0	0	0	0	0	0	0.000527441	0	0	0	0	0	0	0	0
655	Zymogen granule protein 16 homolog B OS=Homo sapiens GN=ZG16B PE=1 SV=3	ZG16B_HUMAN	23	7.63	Homo sapiens	0	0	0	0	0	0	0	0	0	0	0	0	0	0	0	0	0	0	0	0	0	0	0	0	0	0	0	0	0	0	0	0	0	0	0	0	0	0	0	0	0	0	0	0
656	Adenylate kinase 2, mitochondrial OS=Homo sapiens GN=AK2 PE=1 SV=2	KAD2_HUMAN	26	7.97	Homo sapiens	2	0	2	2	0	0	0	0	0	0	0	0	0	0	0	0.0769231	0	0.0769231	0.0769231	0	0	0	0	0	0	0	0	0	0	0	0.000984678	0	0.000870021	0.000965014	0	0	0	0	0	0	0	0	0	0
657	Beta-galactoside alpha-2,6-sialyltransferase 1 OS=Homo sapiens GN=ST6GAL1 PE=1 SV=1	SIAT1_HUMAN	47	9.35	Homo sapiens	0	0	0	0	0	0	0	0	0	0	0	0	0	0	0	0	0	0	0	0	0	0	0	0	0	0	0	0	0	0	0	0	0	0	0	0	0	0	0	0	0	0	0	0
658	Carbonic anhydrase 1 OS=Homo sapiens GN=CA1 PE=1 SV=2	CAH1_HUMAN	29	7.14	Homo sapiens	0	2	0	0	0	0	0	0	0	0	0	0	0	0	0	0	0.0689655	0	0	0	0	0	0	0	0	0	0	0	0	0	0	0.00081167	0	0	0	0	0	0	0	0	0	0	0	0
659	SPARC OS=Homo sapiens GN=SPARC PE=1 SV=1	SPRC_HUMAN	35	4.47	Homo sapiens	0	0	0	0	0	0	0	0	0	0	0	0	0	0	0	0	0	0	0	0	0	0	0	0	0	0	0	0	0	0	0	0	0	0	0	0	0	0	0	0	0	0	0	0
660	Heterogeneous nuclear ribonucleoproteins A2/B1 OS=Homo sapiens GN=HNRNPA2B1 PE=1 SV=2	ROA2_HUMAN	37	9.26	Homo sapiens	0	0	0	0	0	0	0	0	0	0	0	0	0	0	0	0	0	0	0	0	0	0	0	0	0	0	0	0	0	0	0	0	0	0	0	0	0	0	0	0	0	0	0	0
661	Propionyl-CoA carboxylase alpha chain, mitochondrial OS=Homo sapiens GN=PCCA PE=1 SV=4	PCCA_HUMAN	80	7.56	Homo sapiens	0	0	0	0	0	0	0	0	0	0	0	0	0	0	0	0	0	0	0	0	0	0	0	0	0	0	0	0	0	0	0	0	0	0	0	0	0	0	0	0	0	0	0	0
662	Vesicle-trafficking protein SEC22b OS=Homo sapiens GN=SEC22B PE=1 SV=4	SC22B_HUMAN	25	6.92	Homo sapiens	0	0	0	0	0	0	0	0	0	0	0	0	0	0	0	0	0	0	0	0	0	0	0	0	0	0	0	0	0	0	0	0	0	0	0	0	0	0	0	0	0	0	0	0
663	Transmembrane protein 63A OS=Homo sapiens GN=TMEM63A PE=2 SV=3	TM63A_HUMAN	92	6.98	Homo sapiens	0	0	0	0	0	0	0	0	2	0	0	0	0	0	0	0	0	0	0	0	0	0	0	0.0217391	0	0	0	0	0	0	0	0	0	0	0	0	0	0	0.000281625	0	0	0	0	0
664	Gamma-glutamyltranspeptidase 1 OS=Homo sapiens GN=GGT1 PE=1 SV=2	GGT1_HUMAN	61	7.13	Homo sapiens	0	0	0	0	0	0	0	0	0	0	0	0	0	0	0	0	0	0	0	0	0	0	0	0	0	0	0	0	0	0	0	0	0	0	0	0	0	0	0	0	0	0	0	0
665	Skin-specific protein 32 OS=Homo sapiens GN=XP32 PE=1 SV=1	XP32_HUMAN	26	7.99	Homo sapiens	0	0	0	0	0	0	0	0	0	0	0	0	0	0	0	0	0	0	0	0	0	0	0	0	0	0	0	0	0	0	0	0	0	0	0	0	0	0	0	0	0	0	0	0
666	Vimentin OS=Homo sapiens GN=VIM PE=1 SV=4	VIME_HUMAN	54	4.77	Homo sapiens	0	0	0	0	0	0	0	0	0	0	0	0	0	0	0	0	0	0	0	0	0	0	0	0	0	0	0	0	0	0	0	0	0	0	0	0	0	0	0	0	0	0	0	0
667	Procollagen C-endopeptidase enhancer 1 OS=Homo sapiens GN=PCOLCE PE=1 SV=2	PCOC1_HUMAN	48	7.47	Homo sapiens	0	0	0	0	0	0	0	0	0	0	0	0	0	0	0	0	0	0	0	0	0	0	0	0	0	0	0	0	0	0	0	0	0	0	0	0	0	0	0	0	0	0	0	0
668	Protein MENT OS=Homo sapiens GN=MENT PE=2 SV=1	MENT_HUMAN	37	8.67	Homo sapiens	0	0	0	0	0	0	0	0	0	0	0	0	0	2	0	0	0	0	0	0	0	0	0	0	0	0	0	0	0.0540541	0	0	0	0	0	0	0	0	0	0	0	0	0	0	0.000654066
669	C-Maf-inducing protein OS=Homo sapiens GN=CMIP PE=1 SV=3	CMIP_HUMAN	86	6.68	Homo sapiens	0	0	0	0	0	0	0	0	0	0	0	0	0	0	0	0	0	0	0	0	0	0	0	0	0	0	0	0	0	0	0	0	0	0	0	0	0	0	0	0	0	0	0	0
670	Thyroxine-binding globulin OS=Homo sapiens GN=SERPINA7 PE=1 SV=2	THBG_HUMAN	46	6.27	Homo sapiens	0	0	0	0	0	0	0	0	0	0	0	0	0	0	0	0	0	0	0	0	0	0	0	0	0	0	0	0	0	0	0	0	0	0	0	0	0	0	0	0	0	0	0	0
671	Glutathione reductase, mitochondrial OS=Homo sapiens GN=GSR PE=1 SV=2	GSHR_HUMAN	56	8.66	Homo sapiens	0	0	0	0	0	0	0	0	0	0	0	0	0	0	0	0	0	0	0	0	0	0	0	0	0	0	0	0	0	0	0	0	0	0	0	0	0	0	0	0	0	0	0	0
672	Protein-glutamine gamma-glutamyltransferase E OS=Homo sapiens GN=TGM3 PE=1 SV=4	TGM3_HUMAN	77	5.6	Homo sapiens	0	0	0	0	0	0	0	0	0	0	0	0	0	0	0	0	0	0	0	0	0	0	0	0	0	0	0	0	0	0	0	0	0	0	0	0	0	0	0	0	0	0	0	0
673	Blood group Rh(CE) polypeptide OS=Homo sapiens GN=RHCE PE=1 SV=2	RHCE_HUMAN	46	9.71	Homo sapiens	0	0	0	0	0	0	0	0	0	0	0	0	0	0	0	0	0	0	0	0	0	0	0	0	0	0	0	0	0	0	0	0	0	0	0	0	0	0	0	0	0	0	0	0
674	Mannose-binding protein C OS=Homo sapiens GN=MBL2 PE=1 SV=2	MBL2_HUMAN	26	5.14	Homo sapiens	0	0	0	0	0	0	0	0	0	0	0	0	0	0	0	0	0	0	0	0	0	0	0	0	0	0	0	0	0	0	0	0	0	0	0	0	0	0	0	0	0	0	0	0
675	Sushi domain-containing protein 1 OS=Homo sapiens GN=SUSD1 PE=1 SV=1	SUSD1_HUMAN	83	6.4	Homo sapiens	0	2	2	0	0	0	0	0	0	0	0	0	0	0	0	0	0.0240964	0.0240964	0	0	0	0	0	0	0	0	0	0	0	0	0	0.000283595	0.000272537	0	0	0	0	0	0	0	0	0	0	0
676	Single-stranded DNA-binding protein, mitochondrial OS=Homo sapiens GN=SSBP1 PE=1 SV=1	SSBP_HUMAN	17	10.04	Homo sapiens	0	2	0	0	0	0	0	0	0	0	0	0	0	0	0	0	0.117647	0	0	0	0	0	0	0	0	0	0	0	0	0	0	0.00138461	0	0	0	0	0	0	0	0	0	0	0	0
677	Hypoxia up-regulated protein 1 OS=Homo sapiens GN=HYOU1 PE=1 SV=1	HYOU1_HUMAN	111	4.88	Homo sapiens	0	0	0	0	0	0	0	0	0	0	0	0	0	0	0	0	0	0	0	0	0	0	0	0	0	0	0	0	0	0	0	0	0	0	0	0	0	0	0	0	0	0	0	0
678	CD99 antigen OS=Homo sapiens GN=CD99 PE=1 SV=1	CD99_HUMAN	19	4.34	Homo sapiens	0	0	0	0	0	0	0	0	0	0	0	0	0	0	0	0	0	0	0	0	0	0	0	0	0	0	0	0	0	0	0	0	0	0	0	0	0	0	0	0	0	0	0	0
679	Retinoic acid receptor responder protein 2 OS=Homo sapiens GN=RARRES2 PE=1 SV=1	RARR2_HUMAN	19	9.47	Homo sapiens	0	0	0	0	0	0	0	0	0	0	0	0	0	0	0	0	0	0	0	0	0	0	0	0	0	0	0	0	0	0	0	0	0	0	0	0	0	0	0	0	0	0	0	0
680	Vesicle-associated membrane protein-associated protein B/C OS=Homo sapiens GN=VAPB PE=1 SV=3	VAPB_HUMAN	27	7.39	Homo sapiens	0	0	0	0	0	0	0	0	2	0	0	0	0	0	0	0	0	0	0	0	0	0	0	0.0740741	0	0	0	0	0	0	0	0	0	0	0	0	0	0	0.000959611	0	0	0	0	0
681	Hepatocyte growth factor-like protein OS=Homo sapiens GN=MST1 PE=1 SV=2	HGFL_HUMAN	80	7.71	Homo sapiens	0	0	0	0	0	0	0	0	0	0	0	0	0	0	0	0	0	0	0	0	0	0	0	0	0	0	0	0	0	0	0	0	0	0	0	0	0	0	0	0	0	0	0	0
682	Tetraspanin-9 OS=Homo sapiens GN=TSPAN9 PE=1 SV=1	TSN9_HUMAN	27	7.74	Homo sapiens	0	0	0	0	0	0	0	0	0	0	0	0	0	0	0	0	0	0	0	0	0	0	0	0	0	0	0	0	0	0	0	0	0	0	0	0	0	0	0	0	0	0	0	0
683	ES1 protein homolog, mitochondrial OS=Homo sapiens GN=C21orf33 PE=1 SV=3	ES1_HUMAN	28	8.4	Homo sapiens	0	0	0	0	0	0	0	0	2	0	0	0	0	0	0	0	0	0	0	0	0	0	0	0.0714286	0	0	0	0	0	0	0	0	0	0	0	0	0	0	0.00092534	0	0	0	0	0
684	T-complex protein 1 subunit delta OS=Homo sapiens GN=CCT4 PE=1 SV=4	TCPD_HUMAN	58	7.94	Homo sapiens	0	0	0	0	0	0	0	0	0	0	0	0	0	0	0	0	0	0	0	0	0	0	0	0	0	0	0	0	0	0	0	0	0	0	0	0	0	0	0	0	0	0	0	0
685	Receptor expression-enhancing protein 5 OS=Homo sapiens GN=REEP5 PE=1 SV=3	REEP5_HUMAN	21	8.29	Homo sapiens	0	0	0	0	0	0	0	0	0	0	0	0	0	0	0	0	0	0	0	0	0	0	0	0	0	0	0	0	0	0	0	0	0	0	0	0	0	0	0	0	0	0	0	0
686	Caspase-3 OS=Homo sapiens GN=CASP3 PE=1 SV=2	CASP3_HUMAN	32	6.51	Homo sapiens	0	0	0	0	0	0	0	0	0	0	0	0	0	0	0	0	0	0	0	0	0	0	0	0	0	0	0	0	0	0	0	0	0	0	0	0	0	0	0	0	0	0	0	0
687	Leukocyte cell-derived chemotaxin-2 OS=Homo sapiens GN=LECT2 PE=1 SV=2	LECT2_HUMAN	16	9.79	Homo sapiens	0	0	0	0	0	0	0	0	0	0	0	0	0	0	0	0	0	0	0	0	0	0	0	0	0	0	0	0	0	0	0	0	0	0	0	0	0	0	0	0	0	0	0	0
688	Alpha-adducin OS=Homo sapiens GN=ADD1 PE=1 SV=2	ADDA_HUMAN	81	5.61	Homo sapiens	0	0	0	0	0	0	0	0	0	0	0	0	0	0	0	0	0	0	0	0	0	0	0	0	0	0	0	0	0	0	0	0	0	0	0	0	0	0	0	0	0	0	0	0
689	Aldehyde dehydrogenase family 16 member A1 OS=Homo sapiens GN=ALDH16A1 PE=1 SV=2	A16A1_HUMAN	85	6.77	Homo sapiens	2	0	0	0	0	0	0	0	0	0	0	0	0	0	0	0.0235294	0	0	0	0	0	0	0	0	0	0	0	0	0	0	0.000301196	0	0	0	0	0	0	0	0	0	0	0	0	0
690	Mitochondrial 2-oxoglutarate/malate carrier protein OS=Homo sapiens GN=SLC25A11 PE=1 SV=3	M2OM_HUMAN	34	10.4	Homo sapiens	0	0	0	0	0	0	0	0	0	0	0	0	0	0	0	0	0	0	0	0	0	0	0	0	0	0	0	0	0	0	0	0	0	0	0	0	0	0	0	0	0	0	0	0
691	Lysosomal protective protein OS=Homo sapiens GN=CTSA PE=1 SV=2	PPGB_HUMAN	54	6.59	Homo sapiens	0	0	0	0	0	0	0	0	0	0	0	0	0	0	0	0	0	0	0	0	0	0	0	0	0	0	0	0	0	0	0	0	0	0	0	0	0	0	0	0	0	0	0	0
692	Keratin, type II cytoskeletal 3 OS=Homo sapiens GN=KRT3 PE=1 SV=3	K2C3_HUMAN	64	6.41	Homo sapiens	0	0	0	0	0	0	0	0	0	0	0	0	0	0	0	0	0	0	0	0	0	0	0	0	0	0	0	0	0	0	0	0	0	0	0	0	0	0	0	0	0	0	0	0
693	IgGFc-binding protein OS=Homo sapiens GN=FCGBP PE=1 SV=3	FCGBP_HUMAN	572	4.99	Homo sapiens	0	0	0	0	0	0	0	0	0	0	0	0	0	0	0	0	0	0	0	0	0	0	0	0	0	0	0	0	0	0	0	0	0	0	0	0	0	0	0	0	0	0	0	0
694	Propionyl-CoA carboxylase beta chain, mitochondrial OS=Homo sapiens GN=PCCB PE=1 SV=3	PCCB_HUMAN	58	7.7	Homo sapiens	0	0	0	0	0	0	0	0	0	0	0	0	0	0	0	0	0	0	0	0	0	0	0	0	0	0	0	0	0	0	0	0	0	0	0	0	0	0	0	0	0	0	0	0
695	Programmed cell death 6-interacting protein OS=Homo sapiens GN=PDCD6IP PE=1 SV=1	PDC6I_HUMAN	96	6.46	Homo sapiens	0	0	0	0	0	0	0	0	0	0	0	0	0	0	0	0	0	0	0	0	0	0	0	0	0	0	0	0	0	0	0	0	0	0	0	0	0	0	0	0	0	0	0	0
696	Cornulin OS=Homo sapiens GN=CRNN PE=1 SV=1	CRNN_HUMAN	54	6.04	Homo sapiens	0	0	0	0	0	0	0	0	0	0	2	0	0	0	0	0	0	0	0	0	0	0	0	0	0	0.037037	0	0	0	0	0	0	0	0	0	0	0	0	0	0	0.000523547	0	0	0
697	CKLF-like MARVEL transmembrane domain-containing protein 5 OS=Homo sapiens GN=CMTM5 PE=1 SV=2	CKLF5_HUMAN	25	6.62	Homo sapiens	0	0	0	0	0	0	0	0	0	0	0	0	0	0	0	0	0	0	0	0	0	0	0	0	0	0	0	0	0	0	0	0	0	0	0	0	0	0	0	0	0	0	0	0
698	Cystatin-A OS=Homo sapiens GN=CSTA PE=1 SV=1	CYTA_HUMAN	11	5.17	Homo sapiens	0	0	0	0	0	0	0	0	0	0	0	0	0	0	0	0	0	0	0	0	0	0	0	0	0	0	0	0	0	0	0	0	0	0	0	0	0	0	0	0	0	0	0	0
699	Ig delta chain C region OS=Homo sapiens GN=IGHD PE=1 SV=2	IGHD_HUMAN	42	8.02	Homo sapiens	0	0	0	0	0	0	0	0	0	0	0	0	0	0	0	0	0	0	0	0	0	0	0	0	0	0	0	0	0	0	0	0	0	0	0	0	0	0	0	0	0	0	0	0
700	Keratin, type I cytoskeletal 18 OS=Homo sapiens GN=KRT18 PE=1 SV=2	K1C18_HUMAN	48	5.11	Homo sapiens	0	0	0	0	0	0	0	0	0	0	0	0	0	0	0	0	0	0	0	0	0	0	0	0	0	0	0	0	0	0	0	0	0	0	0	0	0	0	0	0	0	0	0	0
701	Transketolase OS=Homo sapiens GN=TKT PE=1 SV=3	TKT_HUMAN	68	7.73	Homo sapiens	0	0	0	0	0	0	0	0	0	0	0	0	0	0	0	0	0	0	0	0	0	0	0	0	0	0	0	0	0	0	0	0	0	0	0	0	0	0	0	0	0	0	0	0
702	Beta-1,4-galactosyltransferase 1 OS=Homo sapiens GN=B4GALT1 PE=1 SV=5	B4GT1_HUMAN	44	8.78	Homo sapiens	0	2	0	0	0	0	0	0	0	0	0	0	0	0	0	0	0.0454545	0	0	0	0	0	0	0	0	0	0	0	0	0	0	0.000534964	0	0	0	0	0	0	0	0	0	0	0	0
703	Protein S100-A11 OS=Homo sapiens GN=S100A11 PE=1 SV=2	S10AB_HUMAN	12	7.25	Homo sapiens	0	0	0	0	0	0	0	0	0	0	0	0	0	0	0	0	0	0	0	0	0	0	0	0	0	0	0	0	0	0	0	0	0	0	0	0	0	0	0	0	0	0	0	0
704	Small integral membrane protein 1 OS=Homo sapiens GN=SMIM1 PE=1 SV=1	SMIM1_HUMAN	9	9.26	Homo sapiens	0	0	0	0	0	0	0	0	0	0	0	0	0	0	0	0	0	0	0	0	0	0	0	0	0	0	0	0	0	0	0	0	0	0	0	0	0	0	0	0	0	0	0	0
705	Ribonuclease inhibitor OS=Homo sapiens GN=RNH1 PE=1 SV=2	RINI_HUMAN	50	4.44	Homo sapiens	0	0	0	0	0	0	0	0	0	0	0	0	0	0	0	0	0	0	0	0	0	0	0	0	0	0	0	0	0	0	0	0	0	0	0	0	0	0	0	0	0	0	0	0
706	Prenylcysteine oxidase-like OS=Homo sapiens GN=PCYOX1L PE=1 SV=2	PCYXL_HUMAN	55	7.34	Homo sapiens	0	0	0	0	2	0	0	0	0	0	0	0	0	0	0	0	0	0	0	0.0363636	0	0	0	0	0	0	0	0	0	0	0	0	0	0	0.000492248	0	0	0	0	0	0	0	0	0
707	Cytochrome c oxidase subunit 7A2, mitochondrial OS=Homo sapiens GN=COX7A2 PE=1 SV=1	CX7A2_HUMAN	9	10.27	Homo sapiens	0	0	0	0	0	0	0	0	0	0	0	0	0	0	0	0	0	0	0	0	0	0	0	0	0	0	0	0	0	0	0	0	0	0	0	0	0	0	0	0	0	0	0	0
708	V-type proton ATPase catalytic subunit A OS=Homo sapiens GN=ATP6V1A PE=1 SV=2	VATA_HUMAN	68	5.16	Homo sapiens	0	0	0	2	0	0	0	0	0	0	0	0	0	0	0	0	0	0	0.0294118	0	0	0	0	0	0	0	0	0	0	0	0	0	0	0.000368976	0	0	0	0	0	0	0	0	0	0
709	Eukaryotic translation initiation factor 5A-1 OS=Homo sapiens GN=EIF5A PE=1 SV=2	IF5A1_HUMAN	17	4.86	Homo sapiens	0	0	0	0	0	0	0	0	0	0	0	0	0	0	0	0	0	0	0	0	0	0	0	0	0	0	0	0	0	0	0	0	0	0	0	0	0	0	0	0	0	0	0	0
710	Serine protease HTRA1 OS=Homo sapiens GN=HTRA1 PE=1 SV=1	HTRA1_HUMAN	51	7.89	Homo sapiens	0	0	0	0	0	0	0	0	0	0	0	0	0	0	0	0	0	0	0	0	0	0	0	0	0	0	0	0	0	0	0	0	0	0	0	0	0	0	0	0	0	0	0	0
711	Sulfide:quinone oxidoreductase, mitochondrial OS=Homo sapiens GN=SQRDL PE=1 SV=1	SQRD_HUMAN	50	9.51	Homo sapiens	0	0	2	0	0	0	0	0	0	0	0	0	0	0	0	0	0	0.04	0	0	0	0	0	0	0	0	0	0	0	0	0	0	0.000452411	0	0	0	0	0	0	0	0	0	0	0
712	GTP-binding nuclear protein Ran OS=Homo sapiens GN=RAN PE=1 SV=3	RAN_HUMAN	24	7.59	Homo sapiens	0	0	0	0	0	0	0	0	0	0	0	0	0	0	0	0	0	0	0	0	0	0	0	0	0	0	0	0	0	0	0	0	0	0	0	0	0	0	0	0	0	0	0	0
713	Arachidonate 5-lipoxygenase-activating protein OS=Homo sapiens GN=ALOX5AP PE=1 SV=2	AL5AP_HUMAN	18	8.64	Homo sapiens	0	0	0	0	0	0	0	0	0	0	0	0	0	0	0	0	0	0	0	0	0	0	0	0	0	0	0	0	0	0	0	0	0	0	0	0	0	0	0	0	0	0	0	0
714	Tricarboxylate transport protein, mitochondrial OS=Homo sapiens GN=SLC25A1 PE=1 SV=2	TXTP_HUMAN	34	10.44	Homo sapiens	0	2	0	0	0	0	0	0	0	0	0	0	0	0	0	0	0.0588235	0	0	0	0	0	0	0	0	0	0	0	0	0	0	0.000692307	0	0	0	0	0	0	0	0	0	0	0	0
715	Eosinophil peroxidase OS=Homo sapiens GN=EPX PE=1 SV=2	PERE_HUMAN	81	10.81	Homo sapiens	0	0	0	0	0	0	0	0	0	0	0	0	0	0	0	0	0	0	0	0	0	0	0	0	0	0	0	0	0	0	0	0	0	0	0	0	0	0	0	0	0	0	0	0
716	Na(+)/H(+) exchange regulatory cofactor NHE-RF1 OS=Homo sapiens GN=SLC9A3R1 PE=1 SV=4	NHRF1_HUMAN	39	5.52	Homo sapiens	0	0	0	0	0	0	0	0	0	0	0	0	0	0	0	0	0	0	0	0	0	0	0	0	0	0	0	0	0	0	0	0	0	0	0	0	0	0	0	0	0	0	0	0
717	Periostin OS=Homo sapiens GN=POSTN PE=1 SV=2	POSTN_HUMAN	93	7.59	Homo sapiens	0	0	0	0	0	0	0	0	0	0	0	0	0	0	0	0	0	0	0	0	0	0	0	0	0	0	0	0	0	0	0	0	0	0	0	0	0	0	0	0	0	0	0	0
718	Connective tissue growth factor OS=Homo sapiens GN=CTGF PE=1 SV=2	CTGF_HUMAN	38	8.03	Homo sapiens	0	0	0	0	0	0	0	0	0	0	0	0	0	0	0	0	0	0	0	0	0	0	0	0	0	0	0	0	0	0	0	0	0	0	0	0	0	0	0	0	0	0	0	0
719	Endothelin-converting enzyme 1 OS=Homo sapiens GN=ECE1 PE=1 SV=2	ECE1_HUMAN	87	5.68	Homo sapiens	0	0	0	0	0	0	0	0	0	0	0	0	0	0	0	0	0	0	0	0	0	0	0	0	0	0	0	0	0	0	0	0	0	0	0	0	0	0	0	0	0	0	0	0
720	Histidine triad nucleotide-binding protein 2, mitochondrial OS=Homo sapiens GN=HINT2 PE=1 SV=1	HINT2_HUMAN	17	9.61	Homo sapiens	0	0	0	0	0	0	0	2	0	0	0	0	0	0	0	0	0	0	0	0	0	0	0.117647	0	0	0	0	0	0	0	0	0	0	0	0	0	0	0.0015991	0	0	0	0	0	0
721	Rho GTPase-activating protein 1 OS=Homo sapiens GN=ARHGAP1 PE=1 SV=1	RHG01_HUMAN	50	6.24	Homo sapiens	0	0	0	0	0	0	0	0	0	0	0	0	0	0	0	0	0	0	0	0	0	0	0	0	0	0	0	0	0	0	0	0	0	0	0	0	0	0	0	0	0	0	0	0
722	Protein disulfide-isomerase A5 OS=Homo sapiens GN=PDIA5 PE=1 SV=1	PDIA5_HUMAN	60	8	Homo sapiens	0	0	0	0	0	0	0	0	0	0	0	0	0	0	0	0	0	0	0	0	0	0	0	0	0	0	0	0	0	0	0	0	0	0	0	0	0	0	0	0	0	0	0	0
723	Protein phosphatase 1 regulatory subunit 12A OS=Homo sapiens GN=PPP1R12A PE=1 SV=1	MYPT1_HUMAN	115	5.06	Homo sapiens	0	0	0	0	0	0	0	0	0	0	0	0	0	0	0	0	0	0	0	0	0	0	0	0	0	0	0	0	0	0	0	0	0	0	0	0	0	0	0	0	0	0	0	0
724	Macrophage receptor MARCO OS=Homo sapiens GN=MARCO PE=1 SV=1	MARCO_HUMAN	53	9.15	Homo sapiens	0	0	0	0	0	0	0	0	0	0	0	0	0	0	0	0	0	0	0	0	0	0	0	0	0	0	0	0	0	0	0	0	0	0	0	0	0	0	0	0	0	0	0	0
725	Insulin-like growth factor-binding protein 2 OS=Homo sapiens GN=IGFBP2 PE=1 SV=2	IBP2_HUMAN	35	7.53	Homo sapiens	0	0	0	0	0	0	0	0	0	0	0	0	0	0	0	0	0	0	0	0	0	0	0	0	0	0	0	0	0	0	0	0	0	0	0	0	0	0	0	0	0	0	0	0
726	G-protein coupled receptor family C group 5 member C OS=Homo sapiens GN=GPRC5C PE=1 SV=2	GPC5C_HUMAN	48	8.52	Homo sapiens	0	0	0	0	0	0	0	0	0	0	0	0	0	0	0	0	0	0	0	0	0	0	0	0	0	0	0	0	0	0	0	0	0	0	0	0	0	0	0	0	0	0	0	0
727	UDP-glucose:glycoprotein glucosyltransferase 1 OS=Homo sapiens GN=UGGT1 PE=1 SV=3	UGGG1_HUMAN	177	5.32	Homo sapiens	0	2	0	0	0	0	0	0	0	0	0	0	0	0	0	0	0.0112994	0	0	0	0	0	0	0	0	0	0	0	0	0	0	0.000132985	0	0	0	0	0	0	0	0	0	0	0	0
728	PDZ and LIM domain protein 7 OS=Homo sapiens GN=PDLIM7 PE=1 SV=1	PDLI7_HUMAN	50	8.49	Homo sapiens	0	0	0	0	0	0	0	0	0	0	0	0	0	0	0	0	0	0	0	0	0	0	0	0	0	0	0	0	0	0	0	0	0	0	0	0	0	0	0	0	0	0	0	0
729	Peroxiredoxin-5, mitochondrial OS=Homo sapiens GN=PRDX5 PE=1 SV=4	PRDX5_HUMAN	22	8.97	Homo sapiens	0	0	0	0	0	0	0	0	0	0	0	0	0	0	0	0	0	0	0	0	0	0	0	0	0	0	0	0	0	0	0	0	0	0	0	0	0	0	0	0	0	0	0	0
730	Proprotein convertase subtilisin/kexin type 9 OS=Homo sapiens GN=PCSK9 PE=1 SV=3	PCSK9_HUMAN	74	6.59	Homo sapiens	0	0	0	0	0	0	0	0	0	0	0	0	0	0	0	0	0	0	0	0	0	0	0	0	0	0	0	0	0	0	0	0	0	0	0	0	0	0	0	0	0	0	0	0
731	Probable hydrolase PNKD OS=Homo sapiens GN=PNKD PE=1 SV=2	PNKD_HUMAN	43	9.37	Homo sapiens	0	0	2	0	0	0	0	0	0	0	0	0	0	0	0	0	0	0.0465116	0	0	0	0	0	0	0	0	0	0	0	0	0	0	0.000526059	0	0	0	0	0	0	0	0	0	0	0
732	Vascular non-inflammatory molecule 2 OS=Homo sapiens GN=VNN2 PE=1 SV=3	VNN2_HUMAN	59	6.5	Homo sapiens	0	0	0	0	0	0	0	0	0	0	0	0	0	0	0	0	0	0	0	0	0	0	0	0	0	0	0	0	0	0	0	0	0	0	0	0	0	0	0	0	0	0	0	0
733	Carboxypeptidase M OS=Homo sapiens GN=CPM PE=1 SV=2	CBPM_HUMAN	51	7.4	Homo sapiens	0	0	0	0	0	0	0	0	0	0	0	0	0	0	0	0	0	0	0	0	0	0	0	0	0	0	0	0	0	0	0	0	0	0	0	0	0	0	0	0	0	0	0	0
734	T-complex protein 1 subunit alpha OS=Homo sapiens GN=TCP1 PE=1 SV=1	TCPA_HUMAN	60	5.96	Homo sapiens	0	0	0	2	0	0	0	0	0	0	0	0	0	0	0	0	0	0	0.0333333	0	0	0	0	0	0	0	0	0	0	0	0	0	0	0.000418173	0	0	0	0	0	0	0	0	0	0
735	Heterogeneous nuclear ribonucleoprotein U OS=Homo sapiens GN=HNRNPU PE=1 SV=6	HNRPU_HUMAN	91	5.8	Homo sapiens	0	0	0	0	0	0	0	0	0	0	0	0	0	0	0	0	0	0	0	0	0	0	0	0	0	0	0	0	0	0	0	0	0	0	0	0	0	0	0	0	0	0	0	0
736	Collagen alpha-1(XVIII) chain OS=Homo sapiens GN=COL18A1 PE=1 SV=5	COIA1_HUMAN	178	5.89	Homo sapiens	0	0	0	0	0	0	0	0	0	0	0	0	0	0	0	0	0	0	0	0	0	0	0	0	0	0	0	0	0	0	0	0	0	0	0	0	0	0	0	0	0	0	0	0
737	Ficolin-1 OS=Homo sapiens GN=FCN1 PE=1 SV=2	FCN1_HUMAN	35	6.85	Homo sapiens	0	0	0	0	0	0	0	0	0	0	0	0	0	0	0	0	0	0	0	0	0	0	0	0	0	0	0	0	0	0	0	0	0	0	0	0	0	0	0	0	0	0	0	0
738	Lactadherin OS=Homo sapiens GN=MFGE8 PE=1 SV=2	MFGM_HUMAN	43	8.21	Homo sapiens	0	0	0	0	0	0	0	0	0	0	0	0	0	0	0	0	0	0	0	0	0	0	0	0	0	0	0	0	0	0	0	0	0	0	0	0	0	0	0	0	0	0	0	0
739	Grancalcin OS=Homo sapiens GN=GCA PE=1 SV=2	GRAN_HUMAN	24	4.82	Homo sapiens	0	0	0	0	0	0	0	0	0	0	0	0	0	0	0	0	0	0	0	0	0	0	0	0	0	0	0	0	0	0	0	0	0	0	0	0	0	0	0	0	0	0	0	0
[truncated: 256 more columns]

## Sheet: MW 5 indiv
						DOPG_CTRL					DOPG_Glioblastoma					DOPG_Lung					DOPG_Meningioma					DOPG_Mieloma					DOPG_Pancreas
						83.8342	77.5274	74.6298	74.6383	82.6678	55.9555	46.3278	54.8642	69.6898	103.236	55.4606	65.1385	60.5616	88.9149	131.461	40.6144	53.5744	64.7855	49.5689	54.4023	32.401	53.9941	50.5677	95.8428	99.4926	71.6914	86.5673	73.8977	97.5264	69.5784
#	Identified Proteins (739)	Accession Number	Molecular Weight /kDa	pI	Taxonomy	DOPG_CTRL_1	DOPG_CTRL_2	DOPG_CTRL_3	DOPG_CTRL_4	DOPG_CTRL_5	DOPG_Glioblastoma_2	DOPG_Glioblastoma_3	DOPG_Glioblastoma_1	DOPG_Glioblastoma_4	DOPG_Glioblastoma_5	DOPG_Lung_1	DOPG_Lung_2	DOPG_Lung_3	DOPG_Lung_4	DOPG_Lung_5	DOPG_Meningioma_1	DOPG_Meningioma_2	DOPG_Meningioma_3	DOPG_Meningioma_4	DOPG_Meningioma_5	DOPG_Mieloma_1	DOPG_Mieloma_2	DOPG_Mieloma_3	DOPG_Mieloma_4	DOPG_Mieloma_5	DOPG_Pancreas_1	DOPG_Pancreas_2	DOPG_Pancreas_3	DOPG_Pancreas_4	DOPG_Pancreas_5
1	Apolipoprotein B-100 OS=Homo sapiens GN=APOB PE=1 SV=2	APOB_HUMAN	516	7.04	Homo sapiens	0.00324844	0.00265421	0.00281047	0.0164421	0.0154452	0.0290331	0.0222958	0.0272808	0.0225461	0.00540679	0.00819394	0.00585609	0.00582362	0.00996662	0.00899922	0.0309733	0.0259894	0.0415872	0.0165721	0.0187835	0.0058204	0.00304505	0.00643505	0.00793805	0.0128453	0.0040882	0.00399256	0.00514622	0.00451069	0.00999697
2	Complement C3 OS=Homo sapiens GN=C3 PE=1 SV=2	CO3_HUMAN	187	6.34	Homo sapiens	0.00720495	0.00719578	0.00632556	0.0544515	0.0508705	0.0106815	0.0144859	0.0147858	0.0107817	0.0628137	0.0204385	0.0150055	0.019229	0.0071507	0.0129016	0.0164688	0.0148386	0.0117229	0.0117246	0.0121272	0.0377728	0.0121691	0.0232091	0.065462	0.0406338	0.0039034	0.00446751	0.00429124	0.00858465	0.0299691
3	Serum albumin OS=Homo sapiens GN=ALB PE=1 SV=2	ALBU_HUMAN	69	6.21	Homo sapiens	0.0392911	0.0408991	0.0348977	0.0656999	0.0812401	0.0648492	0.0642598	0.0733624	0.0359891	0.0132432	0.0420285	0.0385899	0.0358154	0.0196371	0.112485	0.0565878	0.0590713	0.065504	0.0266845	0.0459152	0.0286758	0.0352897	0.0316112	0.0166533	0.0226534	0.0408335	0.0289095	0.0370316	0.0204073	0.140479		12	0.00530569	0.00455981	0.00432512	0.0207971	0.0198437	0.0319623	0.0250627	0.0297507	0.0241444	0.00809054	0.0108015	0.00628102
4	Fibrinogen beta chain OS=Homo sapiens GN=FGB PE=1 SV=2	FIBB_HUMAN	56	8.38	Homo sapiens	0.0160289	0.0210782	0.0204267	0.0240891	0.0246604	0.0011678	0	0.0020631	0.00177995	0.0159148	0.000863083	0.0037562	0.0034315	0.341734	0.0389873	0.00573056	0	0	0.0109358	0.000662536	0.136238	0.0831156	0.0209338	0.0115786	0.0090271	0.0232431	0.0125169	0.0237002	0.0257449	0.0344003		41	0.0531452	0.0494233	0.0511476	0.11216	0.105599	0.0766032	0.0611742	0.0781988	0.0701665	0.112513	0.0642917	0.0481525
5	Fibrinogen alpha chain OS=Homo sapiens GN=FGA PE=1 SV=2	FIBA_HUMAN	95	5.87	Homo sapiens	0.00966421	0.0110905	0.014661	0.0111861	0.0119556	0.000688938	0.00106416	0.00172932	0.00105094	0.00706841	0.00189955	0.001504	0.00207725	0.104924	0.0133978	0.00183556	0.00117799	0.000869664	0.0043583	0.000836575	0.0647406	0.0414246	0.00860351	0.00541691	0.00378183	0.0147905	0.00656634	0.0164319	0.0130995	0.0108951		93	0.0976678	0.0942058	0.0946025	0.139641	0.132467	0.0968571	0.0766882	0.0956384	0.10077	0.168768	0.0969039	0.0802977
6	Myosin-9 OS=Homo sapiens GN=MYH9 PE=1 SV=4	MYH9_HUMAN	227	5.29	Homo sapiens	0.00975131	0.0100816	0.0108597	0	0	0.00362381	0.000443318	0.000939231	0.0029422	0.00715486	0.00129377	0.0022162	0.00193818	0.00174098	0.00436687	0.00376355	0.00543255	0.00174487	0.00201991	0.00167287	0.00670131	0.0112383	0.0127775	0.00672069	0.00565616	0.00880653	0.00785278	0.00983178	0.00769547	0.00419316		149	0.139237	0.137321	0.13981	0.175148	0.170826	0.110085	0.0849201	0.109982	0.120219	0.206344	0.124843	0.10966
7	Beta-2-glycoprotein 1 OS=Homo sapiens GN=APOH PE=1 SV=3	APOH_HUMAN	38	8.03	Homo sapiens	0.0277215	0.0316486	0.030761	0.00682507	0.00734087	0.0685148	0.026596	0.0262024	0.0244144	0.0303333	0.0462109	0.0372684	0.044263	0.00762531	0.00860136	0.0460668	0.0103177	0.0482949	0.036662	0.0488658	0.0292769	0.0274616	0.0249689	0.0237751	0.0184172	0.0230307	0.0211789	0.0199552	0.0137507	0.00923208		181	0.170082	0.170221	0.170861	0.204193	0.204238	0.144868	0.112935	0.138773	0.15188	0.235477	0.157416	0.142793
8	Filamin-A OS=Homo sapiens GN=FLNA PE=1 SV=4	FLNA_HUMAN	281	5.95	Homo sapiens	0.00509297	0.00518673	0.00534375	0	0	0.00252272	0.000513255	0.00305122	0.00178149	0.00465399	0.00299613	0.00484246	0.0033311	0.000809689	0.00284202	0.00322994	0.00272431	0.00188912	0.00165235	0.00176602	0.00407525	0.00584858	0.00597589	0.00393439	0.00298375	0.00587686	0.00507017	0.00647263	0.00601694	0.00261668		243	0.275901	0.268102	0.274004	0.359498	0.360922	0.248042	0.244487	0.249107	0.274881	0.323612	0.29907	0.250469
9	Fibrinogen gamma chain OS=Homo sapiens GN=FGG PE=1 SV=3	FIBG_HUMAN	52	5.32	Homo sapiens	0.0136404	0.0151591	0.0156243	0.0173851	0.0166561	0.00103138	0	0.00105203	0.00130934	0.0107433	0.00104923	0.00265578	0.0026285	0.148205	0.0234618	0.00570614	0.000244772	0.000399198	0.00480372	0.000707076	0.0877408	0.0499826	0.0162266	0.00882888	0.00637904	0.0197513	0.00881414	0.02039	0.0160605	0.020485		343	0.408826	0.401958	0.406775	0.501221	0.495412	0.306665	0.30915	0.30864	0.352633	0.445574	0.383657	0.335921
10	Complement C4-B OS=Homo sapiens GN=C4B PE=1 SV=2	CO4B_HUMAN	193	7.28	Homo sapiens	0.00585219	0.0053685	0.00536921	0.00949414	0.00875818	0.0042635	0.00462662	0.00415566	0.00496805	0.00588941	0.00797653	0.00638332	0.0103452	0.00370704	0.00479654	0.00586419	0.00532634	0.00471955	0.00289954	0.00476477	0.00409707	0.00259076	0.00341292	0.00386854	0.00368204	0.0029902	0.0021752	0.00256864	0.00251255	0.00504734		422	0.52937	0.525278	0.522949	0.589211	0.589408	0.402517	0.414276	0.426637	0.445395	0.535957	0.478503	0.45063
11	Talin-1 OS=Homo sapiens GN=TLN1 PE=1 SV=3	TLN1_HUMAN	270	5.94	Homo sapiens	0.00495047	0.00582129	0.00585772	0	0	0.00267019	0.000267083	0.00317113	0.00167263	0.00370703	0.00316355	0.00600072	0.00393471	0.000362803	0.00209347	0.00395217	0.002882	0.00295294	0.00119557	0.00215474	0.00169014	0.00605536	0.00676869	0.00383984	0.00284622	0.00547484	0.00476347	0.00592017	0.00560876	0.00220862		519	0.691321	0.679142	0.675868	0.748842	0.75424	0.628367	0.614083	0.610849	0.616322	0.680498	0.639245	0.616899
12	Fibronectin OS=Homo sapiens GN=FN1 PE=1 SV=4	FINC_HUMAN	263	5.45	Homo sapiens	0.00112256	0.000967086	0.000904843	0.00460527	0.0044132	0.00280717	0.00278833	0.0057516	0.00215601	0.00618683	0.000297325	0.00046948	0.000753737	0.0190595	0.00185121	0.00506976	0.00355051	0.00121411	0.00522516	0.00107072	0.0141859	0.0103067	0.0015284	0.00271001	0.00245697	0.00065222	0.000409917	0.00217871	0.000768132	0.000712694		629	0.804644	0.779602	0.785251	0.803694	0.809659	0.688434	0.685942	0.694035	0.726503	0.811636	0.702876	0.701264
13	Alpha-2-macroglobulin OS=Homo sapiens GN=A2M PE=1 SV=3	A2MG_HUMAN	163	6.43	Homo sapiens	0.00179882	0.00187346	0.00129251	0.00500238	0.00531698	0.00883592	0.00847687	0.00965421	0.011885	0.00152526	0.00173709	0.00216805	0.00172583	0.00525779	0.0126652	0.00560414	0.0149608	0.00618615	0.00459804	0.00740554	0.0016339	0.00151342	0.0012974	0.00326821	0.00666753	0.00262311	0.00174845	0.00279367	0.00195118	0.0241532		739	1	1	1	1	1	1	1	1	1	1	1	1
14	Complement factor H OS=Homo sapiens GN=CFH PE=1 SV=4	CFAH_HUMAN	139	6.59	Homo sapiens	0.00341326	0.00383965	0.00363538	0.0059093	0.00520565	0.00446073	0.00366859	0.00297181	0.00606067	0.0218348	0.00523026	0.00497181	0.00470916	0.00196175	0.00547213	0.00320943	0.00348863	0.0054038	0.00465941	0.00559916	0.00905928	0.00497299	0.00460353	0.0131417	0.0111239	0.00203926	0.00404252	0.00311406	0.00302021	0.0146751
15	Keratin, type II cytoskeletal 1 OS=Homo sapiens GN=KRT1 PE=1 SV=6	K2C1_HUMAN	66	8.33	Homo sapiens	0.00966666	0.00724555	0.0108392	0.0151015	0.0106694	0.0093895	0.0202154	0.00902275	0.0182965	0.00983129	0.0184854	0.0100888	0.0136126	0.00703576	0.00819007	0.0191023	0.0220673	0.00327989	0.0381935	0.0142048	0.0241179	0.00987161	0.0122914	0.0168915	0.0152315	0.00956208	0.00577697	0.0138762	0.0100993	0.00573828
16	Serotransferrin OS=Homo sapiens GN=TF PE=1 SV=3	TRFE_HUMAN	77	7.13	Homo sapiens	0.00756002	0.00759259	0.00731104	0.0122338	0.0156966	0.0130205	0.0146486	0.0161776	0.00785946	0.00247393	0.00857395	0.00754832	0.00715145	0.00306302	0.0165185	0.0100689	0.0117977	0.0177449	0.0065644	0.0172734	0.00304033	0.00683333	0.00686142	0.00382929	0.00521199	0.00748492	0.00540258	0.00649706	0.00435172	0.0220147
17	Ig mu chain C region OS=Homo sapiens GN=IGHM PE=1 SV=3	IGHM_HUMAN	49	6.77	Homo sapiens	0.0139471	0.0139872	0.0133198	0.0121266	0.01174	0.0150372	0.0225958	0.0343721	0.020967	0.010612	0.00760678	0.0167084	0.0153978	0.0174265	0.0132477	0.0100265	0.014994	0.0165904	0.0119386	0.0178934	0.00578825	0.00644938	0.0187137	0.0127241	0.0154718	0.0130543	0.0168969	0.0104129	0.0105171	0.00757945
18	Apolipoprotein A-I OS=Homo sapiens GN=APOA1 PE=1 SV=1	APOA1_HUMAN	31	5.5	Homo sapiens	0.0105434	0.00820586	0.0144167	0.0288727	0.0289336	0.0440334	0.0623032	0.0419488	0.03104	0.00718904	0.0129529	0.00941493	0.0101172	0.0158761	0.0116172	0.0496362	0.0560117	0.0453561	0.0206359	0.0197686	0.00882027	0.00640959	0.0102302	0.0156442	0.0205336	0.0149955	0.00968979	0.0152723	0.0108006	0.00957434
19	Keratin, type I cytoskeletal 9 OS=Homo sapiens GN=KRT9 PE=1 SV=3	K1C9_HUMAN	62	4.89	Homo sapiens	0.00609119	0.00444138	0.00821949	0.0107466	0.00726871	0.0056708	0.0132166	0.00578246	0.0182652	0.00786201	0.0156133	0.00842251	0.00946951	0.00550917	0.00392266	0.0102661	0.0155443	0.00358588	0.0346609	0.0127459	0.0133877	0.00616755	0.00755505	0.0149127	0.0132826	0.00725358	0.00378767	0.00757298	0.00727817	0.00459518				DOPG_CTRL					DOPG_Glioblastoma					DOPG_Lung
20	Ig gamma-1 chain C region OS=Homo sapiens GN=IGHG1 PE=1 SV=1	IGHG1_HUMAN	36	8.31	Homo sapiens	0.00982487	0.01059	0.00982969	0.0215332	0.0239509	0.0168771	0.0142096	0.0187455	0.0134728	0.0112126	0.0116727	0.012098	0.00883532	0.0152233	0.0212299	0.030008	0.018664	0.0151597	0.0181147	0.0176972	0.0247396	0.0162066	0.0122669	0.00920999	0.00946104	0.0123919	0.0250343	0.0162862	0.00786727	0.0209461			N° prot	DOPG_CTRL_1	DOPG_CTRL_2	DOPG_CTRL_3	DOPG_CTRL_4	DOPG_CTRL_5	DOPG_Glioblastoma_2	DOPG_Glioblastoma_3	DOPG_Glioblastoma_1	DOPG_Glioblastoma_4	DOPG_Glioblastoma_5	DOPG_Lung_1
21	Actin, cytoplasmic 1 OS=Homo sapiens GN=ACTB PE=1 SV=1	ACTB_HUMAN	42	5.15	Homo sapiens	0.0195974	0.0239465	0.0217058	0.00224317	0.00201877	0.00808858	0.00290119	0.0072464	0.0059162	0.0124544	0.0145732	0.0232571	0.0189341	0.0037571	0.00737894	0.0171189	0.0109596	0.00699206	0.0095968	0.00976991	0.00953515	0.0201901	0.0207719	0.0118211	0.00838279	0.0189371	0.0204439	0.0218245	0.0164946	0.0111038		>300	12	0.00530569	0.00455981	0.00432512	0.0207971	0.0198437	0.0319623	0.0250627	0.0297507	0.0241444	0.00809054	0.0108015
22	Apolipoprotein E OS=Homo sapiens GN=APOE PE=1 SV=1	APOE_HUMAN	36	5.42	Homo sapiens	0.0073047	0.00814228	0.00804237	0.0212324	0.018479	0.0253151	0.0373753	0.0305555	0.0146994	0.00995567	0.0198837	0.0103475	0.0116109	0.00513605	0.0126143	0.024337	0.0288629	0.0287285	0.0151451	0.01225	0.0142787	0.00983975	0.0121013	0.0129356	0.0126318	0.00986209	0.0156199	0.0132893	0.00768418	0.016038		150-300	29	0.0478396	0.0448635	0.0468224	0.091363	0.0857548	0.0446408	0.0361116	0.0484481	0.0460222	0.104423	0.0534902
23	Alpha-1-antitrypsin OS=Homo sapiens GN=SERPINA1 PE=1 SV=3	A1AT_HUMAN	47	5.31	Homo sapiens	0.00659102	0.00549431	0.0061782	0.0126376	0.0156034	0.0114088	0.0136303	0.0142308	0.0108321	0.00501661	0.0131869	0.00633354	0.00890867	0.00592187	0.0195274	0.0149371	0.0127183	0.011392	0.0118777	0.0156459	0.0135738	0.00660202	0.006885	0.00463676	0.00672655	0.00761445	0.00794743	0.00720037	0.00597536	0.0287676		100-150	52	0.0445226	0.0447825	0.0434549	0.0274805	0.0268686	0.0202539	0.015514	0.0174396	0.0306034	0.0562548	0.0326122
24	Haptoglobin OS=Homo sapiens GN=HP PE=1 SV=1	HPT_HUMAN	45	6.56	Homo sapiens	0.00475856	0.00467139	0.00456507	0.0126005	0.0143882	0.016809	0.0127719	0.0124395	0.0143305	0.00373094	0.0129803	0.00387026	0.00722894	0.00397717	0.0206939	0.00908732	0.0117473	0.0193651	0.00807154	0.02125	0.0104849	0.00733259	0.00642384	0.0057732	0.00966441	0.00786835	0.0122385	0.00851702	0.00576279	0.0137714		80-100	56	0.0415696	0.0431157	0.0452079	0.0355078	0.0383586	0.013228	0.00823185	0.0143438	0.0194491	0.0375761	0.0279394
25	Thrombospondin-1 OS=Homo sapiens GN=THBS1 PE=1 SV=2	TSP1_HUMAN	129	4.51	Homo sapiens	0.00549017	0.00500751	0.00522432	0	0	0.0020291	0.00128366	0.00145737	0.00467866	0.00493048	0.000746026	0.00182899	0.000986249	0.000696956	0.00308992	0.0019461	0.000628296	0.00107604	0.00227394	0.00337385	0.00184169	0.00766598	0.00746398	0.00494767	0.00458711	0.00506002	0.00576267	0.00531454	0.00527322	0.00274037		70-80	32	0.030845	0.0328999	0.031051	0.0290441	0.033412	0.0347827	0.0280153	0.0287904	0.0316609	0.0291323	0.0325728
26	Apolipoprotein(a) OS=Homo sapiens GN=LPA PE=1 SV=1	APOA_HUMAN	501	5.77	Homo sapiens	0.000614963	0.00058383	0.000429136	0.00280408	0.00287118	0.00202205	0.000102359	0.000629424	0.000248746	0.000193252	0.00171482	0.000288244	0.000515274	0.000755857	0.000906448	0.00250339	0.000733446	0.00199349	0.00102334	0.000672489	0.000247415	0.000237188	0.00138184	0.000788986	0.000682569	0.000231731	7.6876e-05	0.00124111	0.000115897	0.000384807		60-70	62	0.105819	0.0978804	0.103143	0.155306	0.156684	0.103174	0.131552	0.110334	0.123001	0.0881351	0.141654
27	Apolipoprotein A-IV OS=Homo sapiens GN=APOA4 PE=1 SV=3	APOA4_HUMAN	45	5.05	Homo sapiens	0.0057345	0.00572465	0.00714646	0.0101433	0.00892716	0.0143041	0.0156985	0.00987281	0.0080718	0.0105483	0.00882721	0.00818926	0.0116172	0.00394583	0.00405471	0.0153196	0.0145303	0.0101791	0.0116826	0.010349	0.00638296	0.00688866	0.00894976	0.0127163	0.0118007	0.00570047	0.00188133	0.00459882	0.00447638	0.00263095		50-60	100	0.132925	0.133856	0.132771	0.141723	0.13449	0.0586229	0.0646627	0.0595333	0.0777522	0.121962	0.0845863
28	C4b-binding protein alpha chain OS=Homo sapiens GN=C4BPA PE=1 SV=2	C4BPA_HUMAN	67	7.31	Homo sapiens	0.0052182	0.00372389	0.00366601	0.0105909	0.00983882	0.00355247	0.00355472	0.00263532	0.00834598	0.0100247	0.010575	0.00719676	0.0122397	0.004209	0.00484375	0.00778813	0.0053854	0.0118404	0.00323179	0.00621705	0.00533616	0.00432185	0.00323482	0.00502248	0.00705064	0.00470273	0.00298861	0.00289955	0.00326297	0.00416515		40-50	79	0.120544	0.12332	0.116174	0.0879895	0.0939963	0.0958523	0.105126	0.117997	0.092762	0.0903835	0.0948467
29	Keratin, type I cytoskeletal 10 OS=Homo sapiens GN=KRT10 PE=1 SV=6	K1C10_HUMAN	59	4.88	Homo sapiens	0.0049845	0.00249033	0.00484936	0.00930964	0.00645044	0.00565862	0.00819069	0.00638841	0.0109116	0.00596415	0.0065286	0.00556224	0.00849271	0.00325594	0.00377807	0.00682395	0.00886054	0.00339704	0.0303394	0.00810509	0.0131676	0.00600513	0.00527418	0.00959072	0.00879989	0.00432252	0.00274018	0.00887683	0.00626209	0.00232978		30-40	97	0.161951	0.153864	0.152918	0.159631	0.164831	0.22585	0.199807	0.184212	0.170927	0.144541	0.160741
30	Inter-alpha-trypsin inhibitor heavy chain H4 OS=Homo sapiens GN=ITIH4 PE=1 SV=4	ITIH4_HUMAN	103	6.97	Homo sapiens	0.00564387	0.00522401	0.00520799	0.00418993	0.00471589	0.000872187	0.0015428	0.00135852	0.00231928	0.00837039	0.00601517	0.00386266	0.00572331	0.00062484	0.00307762	0.00187349	0.00453309	0.00120578	0.00150071	0.00196269	0.00991578	0.00504917	0.00390669	0.00457585	0.00346245	0.00221651	0.0017577	0.00135492	0.00232063	0.00400955		20-30	110	0.113323	0.10046	0.109383	0.0548526	0.0554198	0.060067	0.0718589	0.083186	0.110181	0.131138	0.063631
31	Coagulation factor V OS=Homo sapiens GN=F5 PE=1 SV=4	FA5_HUMAN	252	5.95	Homo sapiens	0.00118197	0.000973939	0.0010443	0.00111942	0.000995512	0.000919671	0.00105798	0.00070039	0.00131749	0.0014861	0.00247575	0.0014604	0.00294355	0.000766759	0.0018123	0.00170463	0.000740336	0.0006957	0.00197192	0.00145971	0.000774366	0.000913474	0.000996769	0.00137142	0.00147124	0.00149984	0.00268962	0.00316768	0.00238855	0.00106837		<20	110	0.195356	0.220398	0.214749	0.196306	0.190341	0.311566	0.314058	0.305965	0.273497	0.188364	0.297124
32	Clusterin OS=Homo sapiens GN=CLU PE=1 SV=1	CLUS_HUMAN	52	6.21	Homo sapiens	0.00604594	0.00603488	0.00626234	0.0080615	0.00743381	0.00710694	0.00857625	0.00980327	0.00621481	0.00614777	0.00831243	0.0106199	0.0100822	0.00273332	0.00366124	0.00764172	0.0077777	0.0174857	0.00483029	0.00742205	0.00688233	0.00500494	0.00632685	0.00442205	0.00574758	0.00645936	0.00340469	0.00389666	0.00400596	0.0041223		tot	739	1	1	1	1	1	1	1	1	1	1	1
33	von Willebrand factor OS=Homo sapiens GN=VWF PE=1 SV=4	VWF_HUMAN	309	5.15	Homo sapiens	0.00141769	0.00132177	0.00108551	0.0013196	0.00146066	0.000907187	0.00251355	0.00167066	0.000653509	0.0023198	0.000254432	3.17375e-05	0.000373033	0.00210253	0.000500176	0.000775196	0.00162897	0.00109881	0	0.000158185	0.00428978	0.00238022	0.00123933	0.000615133	0.000720395	0.00106829	0.00049868	0.00145682	0.000929231	0.0001548
34	Keratin, type II cytoskeletal 2 epidermal OS=Homo sapiens GN=KRT2 PE=1 SV=2	K22E_HUMAN	65	8.17	Homo sapiens	0.00545969	0.00397281	0.00639469	0.00854527	0.00570366	0.00586736	0.0119574	0.00654145	0.00925306	0.00576274	0.00722808	0.00608294	0.00965062	0.0019717	0.00369983	0.00812693	0.0123524	0.00229887	0.0230385	0.00772856	0.0111286	0.00538559	0.00599193	0.00690336	0.00731133	0.00456146	0.00337732	0.00952082	0.00641685	0.00185513
35	Plasminogen OS=Homo sapiens GN=PLG PE=1 SV=2	PLMN_HUMAN	91	7.25	Homo sapiens	0.00479417	0.00384	0.00344667	0.00593643	0.00722792	0.00274817	0.00109572	0.00260913	0.00279506	0.00212864	0.00521511	0.00483582	0.00356321	0.00555263	0.00490504	0.0025013	0.00321429	0.00389501	0.00147577	0.00209043	0.00171228	0.00128255	0.0018127	0.00188611	0.00314121	0.00306367	0.00143852	0.00223862	0.00405635	0.00290152
36	Gelsolin OS=Homo sapiens GN=GSN PE=1 SV=1	GELS_HUMAN	86	6.19	Homo sapiens	0.00498878	0.00564494	0.00514284	0.00471955	0.00552767	0.00248928	0.00158849	0.00288864	0.00353012	0.00536945	0.00566303	0.00814458	0.00755296	0.000613796	0.00221293	0.00339699	0.00246361	0.00113685	0.00299672	0.00299352	0.00688723	0.00423268	0.00451167	0.004675	0.00362634	0.00334402	0.00196979	0.0023106	0.0037707	0.0024518
37	Ig kappa chain C region OS=Homo sapiens GN=IGKC PE=1 SV=1	IGKC_HUMAN	12	5.68	Homo sapiens	0.0182098	0.0233413	0.0212614	0.0323266	0.0372485	0.0199008	0.0275477	0.0343642	0.0465984	0.0317516	0.0140354	0.0220927	0.020626	0.023077	0.0492512	0.0247307	0.027457	0.0180145	0.0364099	0.0505573	0.0156268	0.0179519	0.0186636	0.033069	0.0343731	0.0174022	0.0308133	0.0214224	0.0201948	0.046133
38	Integrin beta-3 OS=Homo sapiens GN=ITGB3 PE=1 SV=2	ITB3_HUMAN	87	4.85	Homo sapiens	0.00495808	0.00623075	0.00612963	0.000255532	0.000431954	0.00233576	0.000665398	0.00230015	0.0019106	0.0054177	0.00255332	0.00404344	0.00309599	0.000811165	0.00317833	0.00336205	0.00264543	0.0013541	0.000997073	0.00133862	0.00248125	0.00647224	0.00644378	0.00456874	0.00387936	0.00495983	0.00407165	0.00581023	0.00542272	0.00325408
39	Integrin alpha-IIb OS=Homo sapiens GN=ITGA2B PE=1 SV=3	ITA2B_HUMAN	113	5.03	Homo sapiens	0.0033131	0.00334784	0.00336087	0.00011334	0.000205463	0.00178946	0.000446988	0.00172721	0.00300124	0.00442913	0.00265418	0.00334177	0.00321577	0.00096427	0.00258357	0.00511949	0.00209706	0.000957061	0.00167379	0.00260304	0.00181713	0.00422895	0.00509027	0.00414643	0.00324104	0.00366695	0.00255575	0.00311672	0.0046873	0.00278197
40	Complement C5 OS=Homo sapiens GN=C5 PE=1 SV=4	CO5_HUMAN	188	6.49	Homo sapiens	0.000313616	0.000182065	6.89083e-05	0.00586851	0.00545685	0.00177479	0.00164511	0.00141912	0.00184115	0.00297177	0.00239975	0.000456156	0.00231189	0.000928661	0.00140173	0.000915975	0.00341031	0.00153349	6.91747e-05	0.00130433	0.00116777	0.000439724	0.000563552	0.000790603	0.00132026	0.000546213	0.000327626	0.000361145	0.00100014	0.00072666
41	Complement component C9 OS=Homo sapiens GN=C9 PE=1 SV=2	CO9_HUMAN	63	5.27	Homo sapiens	0.00582286	0.0061517	0.00554037	0.00986757	0.00883982	0.00132347	0.00297508	0.0027103	0.0020906	0.00281926	0.0157407	0.00966646	0.0147288	0.000961117	0.00169108	0.00531986	0.00651164	0.00220613	0.00107696	0.00146011	0.005065	0.00284054	0.00345253	0.00259649	0.00259319	0.00715324	0.00580814	0.00459485	0.0036335	0.00143065
42	Prothrombin OS=Homo sapiens GN=F2 PE=1 SV=2	THRB_HUMAN	70	5.7	Homo sapiens	0.00151862	0.00159167	0.000902049	0.00395774	0.00466498	0.00687911	0.00607335	0.00416609	0.00775654	0.0029057	0.00567151	0.00570077	0.00597771	0.0016493	0.00391391	0.00534686	0.00417344	0.00581857	0.00791085	0.00761694	0.00162001	0.00171882	0.00253391	0.00346853	0.00578204	0.00160924	0.000880002	0.00276726	0.00161216	0.00324841
43	Complement C1q subcomponent subunit B OS=Homo sapiens GN=C1QB PE=1 SV=3	C1QB_HUMAN	27	8.87	Homo sapiens	0.00266347	0.00191172	0.00297052	0.00415329	0.0029744	0.00683637	0.0157429	0.0124049	0.0249527	0.0197279	0.00222781	0.00116318	0.00221923	0.00508628	0.01165	0.00930646	0.00437493	0.00208997	0.0303361	0.0256637	0.00300669	0.00323456	0.00292084	0.0188922	0.0185669	0.00448566	0.0151189	0.00501744	0.00443682	0.010763
44	Ig alpha-1 chain C region OS=Homo sapiens GN=IGHA1 PE=1 SV=2	IGHA1_HUMAN	38	6.49	Homo sapiens	0.00379497	0.0052055	0.00436648	0.00692034	0.00660338	0.0114438	0.0100426	0.0142404	0.014031	0.00280419	0.0082147	0.00538791	0.00502166	0.00332056	0.00699539	0.00979224	0.0117973	0.010023	0.00817023	0.00951202	0.00224185	0.00272231	0.00435197	0.00455133	0.00648677	0.00601839	0.00780045	0.00725459	0.00431136	0.0126366
45	Inter-alpha-trypsin inhibitor heavy chain H2 OS=Homo sapiens GN=ITIH2 PE=1 SV=2	ITIH2_HUMAN	106	6.85	Homo sapiens	0.00274063	0.00267812	0.00261368	0.00433485	0.00450379	0.0025232	0.00265009	0.00206405	0.00217334	0.00182748	0.0022619	0.00193151	0.0026427	0.000318219	0.00210405	0.00115462	0.00363536	0.00253184	0.000326272	0.0019073	0.000333145	0.000439182	0.000620865	0.001066	0.00176225	0.00308845	0.000871132	0.00127521	0.00245195	0.00250975
46	Ig gamma-3 chain C region OS=Homo sapiens GN=IGHG3 PE=1 SV=2	IGHG3_HUMAN	41	7.95	Homo sapiens	0.00953912	0.00870088	0.0081752	0.0146119	0.0152351	0.0088697	0.0100034	0.0148281	0.0109941	0.00669609	0.00864058	0.00712365	0.00697273	0.00784864	0.0128071	0.0118201	0.0151799	0.0154394	0.0131728	0.0147899	0.0144415	0.0103067	0.00835972	0.00734647	0.0078443	0.0135098	0.0268625	0.0134179	0.00932807	0.0108935
47	Lipopolysaccharide-binding protein OS=Homo sapiens GN=LBP PE=1 SV=3	LBP_HUMAN	53	6.68	Homo sapiens	0.00359473	0.00447086	0.00345711	0.00294444	0.00333717	0.00583812	0.00691902	0.00309525	0.00381872	0.00390048	0.00794059	0.00617866	0.0101925	0.000572577	0.00100323	0.00738755	0.00552171	0.00115128	0.0134622	0.00728737	0.0077684	0.00279642	0.00447857	0.00393457	0.00351466	0.00507851	0.00697395	0.00416855	0.00219411	0.000886566
48	Vitamin D-binding protein OS=Homo sapiens GN=GC PE=1 SV=1	VTDB_HUMAN	53	5.21	Homo sapiens	0.003737	0.00408117	0.00388105	0.00455969	0.00569541	0.00538844	0.00339717	0.00608074	0.00415216	0.00286349	0.00329542	0.00260177	0.00239501	0.000987982	0.00584399	0.00525538	0.00669189	0.00602591	0.00328531	0.0050856	0.00227704	0.00185095	0.00346843	0.00471061	0.00445398	0.00367961	0.00297961	0.00357938	0.00418939	0.00729385
49	Vitronectin OS=Homo sapiens GN=VTN PE=1 SV=1	VTNC_HUMAN	54	5.54	Homo sapiens	0.00407138	0.00534463	0.00504069	0.0024789	0.00274923	0.00583855	0.00519349	0.00269459	0.00521424	0.00466382	0.00503233	0.00607726	0.00590635	0.000912205	0.0027196	0.00473471	0.00391796	0.00590765	0.00497575	0.00556017	0.00690005	0.00557565	0.00365238	0.0036552	0.00329797	0.00525138	0.00371079	0.00493281	0.00246642	0.00277769
50	Vinculin OS=Homo sapiens GN=VCL PE=1 SV=4	VINC_HUMAN	124	5.33	Homo sapiens	0.0028152	0.0031071	0.00328091	0	0	0.000385244	0	0.000293016	0.000331415	0.00276013	0.00203911	0.00412416	0.00270796	0.000175288	0.000837518	0.000987014	0.000553163	0.000371371	0	0	0.000427178	0.00431147	0.00462341	0.00270866	0.00189166	0.00262714	0.0022675	0.00291428	0.00330768	0.000458621
51	Kininogen-1 OS=Homo sapiens GN=KNG1 PE=1 SV=2	KNG1_HUMAN	72	6.8	Homo sapiens	0.00351312	0.0046459	0.00322778	0.0042808	0.00401882	0.00405689	0.00288715	0.00371441	0.00201909	0.00242203	0.00386067	0.00405078	0.00373292	0.00176031	0.00327725	0.00483033	0.00336583	0.00228749	0.00253633	0.00229498	0.0038907	0.00221226	0.00303166	0.00184289	0.0016016	0.00217607	0.0019241	0.00201311	0.00161119	0.00427057
52	Hornerin OS=Homo sapiens GN=HRNR PE=1 SV=2	HORN_HUMAN	282	10.24	Homo sapiens	0.000590783	0.000426829	0.000981766	0.00111028	0.000759459	0.000549247	0.00155664	0.000775723	0.00105493	0.000572474	0.000705428	0.000346214	0.00029151	0.000127618	0.000251778	0.000565855	0.00247004	0.000256383	0.000885792	0.00030472	0.0021404	0.000925744	0.000911126	0.0011302	0.000888714	0.000445434	0.00047798	0.000755178	0.00066595	4.74501e-05
53	Alpha-actinin-1 OS=Homo sapiens GN=ACTN1 PE=1 SV=2	ACTN1_HUMAN	103	5.07	Homo sapiens	0.00461143	0.00440093	0.00412606	0	0	0.00081092	0	0.000828058	0.000636904	0.00247644	0.000408787	0.00268799	0.000907063	0.000280907	0.00106102	0.000718501	0.0012124	0.000752889	0.00072856	0.000297205	0	0.00311048	0.00390602	0.00265407	0.00280369	0.00298116	0.00265518	0.00328588	0.00507412	0.000876906
54	Complement C1r subcomponent OS=Homo sapiens GN=C1R PE=1 SV=2	C1R_HUMAN	80	6.14	Homo sapiens	0.00158258	0.0016064	0.00222829	0.00195964	0.00230835	0.0005953	0.000993653	0.000455879	0.00400512	0.00706223	0.00239815	0.00145885	0.00261986	0.000234621	0.00145422	0.000916136	0.000933576	0.000391506	0.000668019	0.00314296	0.00890532	0.00436726	0.00355201	0.00512884	0.00432629	0.00507171	0.00231135	0.00281976	0.00312307	0.0011247
55	Apolipoprotein D OS=Homo sapiens GN=APOD PE=1 SV=1	APOD_HUMAN	21	4.79	Homo sapiens	0.00284764	0.00307465	0.00361491	0.007262	0.00763286	0.0193127	0.0212768	0.0242765	0.0118226	0.00968664	0.00997499	0.0092924	0.013557	0.00248011	0.0131507	0.00754758	0.014812	0.0306893	0.00766837	0.0102064	0.0102975	0.00838818	0.00471098	0.0058145	0.008986	0.00447126	0.00513553	0.00407674	0.00390538	0.0117128
56	Ceruloplasmin OS=Homo sapiens GN=CP PE=1 SV=1	CERU_HUMAN	122	5.5	Homo sapiens	0.000815171	0.000780325	0.00055319	0.00416773	0.00418299	0.00176005	0.00205934	0.00199245	0.00295147	5.31124e-05	0.00143333	0.000587776	0.00126665	0.000399162	0.00326463	0.00135094	0.00229815	0.00282857	0.00120803	0.00392064	0.000116439	0	0.000320923	0.000713666	0.00182594	0.00107072	0.00129432	0.00103632	0.0011502	0.00413613
57	Apolipoprotein C-III OS=Homo sapiens GN=APOC3 PE=1 SV=1	APOC3_HUMAN	11	5.04	Homo sapiens	0.0235149	0.0207545	0.0256638	0.0186446	0.0161143	0.0211324	0.0176962	0.020428	0.0077229	0.0187842	0.0273616	0.031111	0.0280702	0.0044396	0.0166015	0.0146275	0.00789762	0.0272284	0.0116193	0.018939	0.00675257	0.00774016	0.0228225	0.0239582	0.0179615	0.0249293	0.0101556	0.0184096	0.0146342	0.0188338
58	Platelet factor 4 OS=Homo sapiens GN=PF4 PE=1 SV=2	PLF4_HUMAN	11	8.78	Homo sapiens	0.0155959	0.0168422	0.0186635	0	0	0.0671986	0.0267463	0.0414559	0.0173554	0.00616608	0.0273231	0.0419013	0.0290761	0.00726239	0.00461397	0.029776	0.0163819	0.0206723	0.0288155	0.0295278	0.00129141	0.0128226	0.0204178	0.00953779	0.0104847	0.0110802	0.0087471	0.0139662	0.00745892	0.00378571
59	Ig gamma-2 chain C region OS=Homo sapiens GN=IGHG2 PE=1 SV=2	IGHG2_HUMAN	36	7.66	Homo sapiens	0.00874682	0.00800068	0.00817927	0.0231981	0.0291112	0.00860486	0.0113629	0.0161817	0.0101581	0.00502331	0.00917234	0.00599067	0.00535093	0.00761748	0.0182401	0.0143597	0.012958	0.0158622	0.00950973	0.0144683	0	0.00456793	0.0062191	0.00531642	0.00587357	0.0113852	0.0180796	0.0106676	0.0060703	0.0135908
60	Keratin, type I cytoskeletal 16 OS=Homo sapiens GN=KRT16 PE=1 SV=4	K1C16_HUMAN	51	4.69	Homo sapiens	0.00249971	0.00210191	0.00298115	0.00937522	0.00730642	0.00338652	0.00592257	0.00238478	0.00887588	0.00493825	0.00636087	0.00433378	0.00475258	0.00263197	0.00451859	0.0023998	0.00586893	0.00221171	0.017713	0.00480485	0.00625284	0.00230185	0.00439278	0.00817099	0.00772903	0.0015388	0.00105327	0.00424479	0.00322241	0.000262371
61	Apolipoprotein A-II OS=Homo sapiens GN=APOA2 PE=1 SV=1	APOA2_HUMAN	11	6.6	Homo sapiens	0.00765614	0.00704374	0.0101409	0.0204016	0.0190638	0.0265314	0.0379708	0.0232701	0.025618	0.00821326	0.0147457	0.0149075	0.0159545	0.0112784	0.010144	0.0326676	0.0334079	0.020097	0.0286308	0.0261807	0.00967976	0.0137627	0.0107731	0.0120814	0.0136857	0.0190352	0.0097967	0.0155522	0.0127295	0.00919654
62	Complement factor H-related protein 5 OS=Homo sapiens GN=CFHR5 PE=1 SV=1	FHR5_HUMAN	64	7.08	Homo sapiens	0.00248532	0.0017403	0.0021628	0.00349003	0.00337404	0.00195223	0	0.000670284	0.00239553	0.00585311	0.00655931	0.00423515	0.00600512	0.00023816	0.000833534	0.000372417	0.000190433	0.00112215	0.00147796	0.000957151	0.00581072	0.00345655	0.00454309	0.00603938	0.00484673	0.000803523	0.0033688	0.000777605	0.0019767	0.00101897
63	Properdin OS=Homo sapiens GN=CFP PE=1 SV=2	PROP_HUMAN	51	7.92	Homo sapiens	0.00108889	0.00125955	0.00114147	0.00825632	0.00680593	0.000463422	0.00126318	0.00154829	0.000134454	0.00728142	0.0039088	0.00301819	0.00419615	0.00110149	0.00218965	0.000247688	0.00024367	0	0	0	0.0103568	0.00658958	0.0068692	0.0076175	0.00525629	0.000288115	0.000150341	0.0007969	0.00235099	0.00481303
64	Inter-alpha-trypsin inhibitor heavy chain H1 OS=Homo sapiens GN=ITIH1 PE=1 SV=3	ITIH1_HUMAN	101	6.78	Homo sapiens	0.00228233	0.00238713	0.00229678	0.00367207	0.00369484	0.000942532	0.00156646	0.00102365	0.00173802	0.000767321	0.00184417	0.00187248	0.00262468	7.26777e-05	0.00203428	0.00147156	0.00203204	0.00208481	0.00012916	0.00188396	0.00189947	0.000921366	0.000846139	0.000642658	0.00120443	0.00395831	0.000686321	0.00164954	0.00165874	0.00248815
65	Complement factor H-related protein 1 OS=Homo sapiens GN=CFHR1 PE=1 SV=2	FHR1_HUMAN	38	7.42	Homo sapiens	0.00605311	0.0065765	0.00730127	0.00469622	0.00354728	0.0127075	0.011916	0.00479873	0.00982574	0.0147875	0.0072648	0.0159165	0	0.00295663	0.00467385	0.00771954	0.00245993	0.0052949	0.0168185	0.0111315	0.0221203	0.0103132	0.0234678	0.0220023	0.0181436	0.00295582	0.0105368	0.00474132	0.00566687	0.0111151
66	Multimerin-1 OS=Homo sapiens GN=MMRN1 PE=1 SV=3	MMRN1_HUMAN	138	8.01	Homo sapiens	0.00187216	0.00217619	0.00216909	0	0	0	0	0.00061976	0.000384664	0.00138067	0.00222454	0.001816	0.0018684	0	0.000679005	0.000620041	0.000450929	0.000146088	0.000591046	0.000399288	0.000102938	0.00203289	0.001628	0.00126327	0.00124096	0.001858	0.00153489	0.00192894	0.00200482	0.000454451
67	Immunoglobulin lambda-like polypeptide 5 OS=Homo sapiens GN=IGLL5 PE=2 SV=2	IGLL5_HUMAN	23	9.05	Homo sapiens	0.00566189	0.00709004	0.00562065	0.00890669	0.00967722	0.0077641	0.00874743	0.0166642	0.00589747	0.00294784	0.00442751	0.00491144	0.00478078	0.00425878	0.00837218	0.00921381	0.00730625	0.0118576	0.00524344	0.00958147	0.00246181	0.00264683	0.0060096	0.00469714	0.00524366	0.00807051	0.0132197	0.00706321	0.00653241	0.00852764
68	Complement C1q subcomponent subunit A OS=Homo sapiens GN=C1QA PE=1 SV=2	C1QA_HUMAN	26	9.45	Homo sapiens	0.00106501	0.00064625	0.00103133	0.00189389	0.00187069	0.00206276	0.00526907	0.00326865	0.0240822	0.0125514	0	0.00077028	0.000828812	0.00230178	0.0111214	0.00607053	0.00118111	0.00158998	0.0170828	0.0122616	0.00231049	0.00112995	0.00100391	0.0130766	0.0139029	0.00178952	0.0167438	0.00431142	0.00235864	0.0151946
69	Erythrocyte band 7 integral membrane protein OS=Homo sapiens GN=STOM PE=1 SV=3	STOM_HUMAN	32	8.07	Homo sapiens	0.007081	0.00670779	0.0069877	0.000277435	0.000276272	0.00800611	0.003128	0.00569636	0.00439125	0.0037331	0.00714968	0.00849356	0.00739803	0.00106287	0.00245203	0.00772851	0.00659188	0.00578429	0.00295592	0.00554845	0.00698531	0.0103255	0.00905545	0.0040548	0.00395556	0.00683563	0.00649681	0.00635608	0.00437301	0.00200669
70	Histidine-rich glycoprotein OS=Homo sapiens GN=HRG PE=1 SV=1	HRG_HUMAN	60	7.52	Homo sapiens	0.00378418	0.00372916	0.00363926	0.00304826	0.0029404	0.00526462	0.00287266	0.0045616	0.00354964	0.00322943	0.00390642	0.00272132	0.0013701	0.00224891	0.00249548	0.00727281	0.00393692	0.00187894	0.00592292	0.00234749	0	0.00103228	0.00120567	0.00242178	0.00301945	0.000394137	0	0.000219231	0.000854668	0.00163028
71	Serum paraoxonase/arylesterase 1 OS=Homo sapiens GN=PON1 PE=1 SV=3	PON1_HUMAN	40	4.89	Homo sapiens	0.00355459	0.00332655	0.00446396	0.00412167	0.00519566	0.00387089	0.00470505	0.00608291	0.00550733	0.0030685	0.00165411	0.00368631	0.0031583	0.00199716	0.00405536	0.00556907	0.00529001	0.00657665	0.00267359	0.00260203	0.00132425	0.00228289	0.0041256	0.00373752	0.00375054	0.00524283	0.00712495	0.00586835	0.00333453	0.00486959
72	Heparin cofactor 2 OS=Homo sapiens GN=SERPIND1 PE=1 SV=3	HEP2_HUMAN	57	6.89	Homo sapiens	0.00336862	0.00370782	0.00344358	0.00657197	0.00719503	0.000528834	0.00138915	0.00169868	0.00196147	0.00232173	0.00560048	0.00548047	0.00599942	0.000401111	0.00186899	0.00253658	0.00240992	0.000725255	0.000685527	0.00118299	0.00311023	0.000515416	0.00253199	0.00206173	0.00212816	0.00186208	0.000406226	0.000949524	0.00192111	0.000780492
73	Complement C1q subcomponent subunit C OS=Homo sapiens GN=C1QC PE=1 SV=3	C1QC_HUMAN	26	8.58	Homo sapiens	0.00198502	0.00248337	0.00275259	0.0056882	0.00444891	0.00733439	0.0119012	0.0100506	0.00908887	0.00819615	0.00209024	0.00275008	0.00361056	0.00462515	0.00731713	0.00599184	0.00478218	0.00475376	0.0119145	0.00988622	0.00313004	0.00286332	0.00432047	0.00854839	0.0093111	0.0039558	0.0106653	0.00433987	0.00394801	0.00754351
74	CD5 antigen-like OS=Homo sapiens GN=CD5L PE=1 SV=1	CD5L_HUMAN	38	5.15	Homo sapiens	0.00353922	0.00430004	0.00400662	0.00387756	0.00363617	0.00579833	0.00796086	0.00880242	0.00755867	0.00229507	0.00127191	0.00483584	0.00534049	0.00338016	0.00386931	0.0057464	0.00556843	0.00529811	0.00178548	0.0043497	0.00298424	0.00290086	0.00503325	0.00458406	0.00451566	0.00403657	0.004256	0.0040404	0.00395383	0.00273703
[truncated: 665 more rows]
[truncated: 19 more columns]

## Sheet: pI individ
						DOPG_CTRL					DOPG_Glioblastoma					DOPG_Lung					DOPG_Meningioma					DOPG_Mieloma					DOPG_Pancreas
[truncated: 741 more rows]
[truncated: 19 more columns]

## Sheet: Top25
						DOPG_CTRL					DOPG_Glioblastoma					DOPG_Lung					DOPG_Meningioma					DOPG_Mieloma					DOPG_Pancreas
[truncated: 741 more rows]
[truncated: 49 more columns]

[truncated: 1 more sheets: Category 5 indiv]
