# Supplementary material for: Disease-specific protein corona sensor arrays may have disease detection capacity
Source: Royal Society of Chemistry journal article supplement (doi:10.1039/c9nh00097f), 2019-01-01
Supplement: c9nh00097f2.xlsx [file c9nh00097f2.xlsx]

## Sheet: Samples Report of CHOL by indiv
						CHOL_CTRL
						Spectral counts															Percent coverage															Unique peptide
						CHOL_CTRL_1			CHOL_CTRL_2			CHOL_CTRL_3			CHOL_CTRL_4			CHOL_CTRL_5			CHOL_CTRL_1			CHOL_CTRL_2			CHOL_CTRL_3			CHOL_CTRL_4			CHOL_CTRL_5			CHOL_CTRL_1			CHOL_CTRL_2			CHOL_CTRL_3			CHOL_CTRL_4			CHOL_CTRL_5
#	Identified Proteins (560)	Accession Number	Molecular Weight /kDa	pI	Taxonomy	2016-05-03_CHOL_PC_CTRL_A_01	2016-05-03_CHOL_PC_CTRL_A_02	2016-05-03_CHOL_PC_CTRL_A_03	2016-05-03_CHOL_PC_CTRL_B_01	2016-05-03_CHOL_PC_CTRL_B_02	2016-05-03_CHOL_PC_CTRL_B_03	2016-05-03_CHOL_PC_CTRL_C_01	2016-05-03_CHOL_PC_CTRL_C_02	2016-05-03_CHOL_PC_CTRL_C_03	2016-07-21_CHOLPC_CTRL_D_01	2016-07-21_CHOLPC_CTRL_D_02	2016-07-21_CHOLPC_CTRL_D_03	2016-07-21_CHOLPC_CTRL_E_01	2016-07-21_CHOLPC_CTRL_E_02	2016-07-21_CHOLPC_CTRL_E_03	2016-05-03_CHOL_PC_CTRL_A_01	2016-05-03_CHOL_PC_CTRL_A_02	2016-05-03_CHOL_PC_CTRL_A_03	2016-05-03_CHOL_PC_CTRL_B_01	2016-05-03_CHOL_PC_CTRL_B_02	2016-05-03_CHOL_PC_CTRL_B_03	2016-05-03_CHOL_PC_CTRL_C_01	2016-05-03_CHOL_PC_CTRL_C_02	2016-05-03_CHOL_PC_CTRL_C_03	2016-07-21_CHOLPC_CTRL_D_01	2016-07-21_CHOLPC_CTRL_D_02	2016-07-21_CHOLPC_CTRL_D_03	2016-07-21_CHOLPC_CTRL_E_01	2016-07-21_CHOLPC_CTRL_E_02	2016-07-21_CHOLPC_CTRL_E_03	2016-05-03_CHOL_PC_CTRL_A_01	2016-05-03_CHOL_PC_CTRL_A_02	2016-05-03_CHOL_PC_CTRL_A_03	2016-05-03_CHOL_PC_CTRL_B_01	2016-05-03_CHOL_PC_CTRL_B_02	2016-05-03_CHOL_PC_CTRL_B_03	2016-05-03_CHOL_PC_CTRL_C_01	2016-05-03_CHOL_PC_CTRL_C_02	2016-05-03_CHOL_PC_CTRL_C_03	2016-07-21_CHOLPC_CTRL_D_01	2016-07-21_CHOLPC_CTRL_D_02	2016-07-21_CHOLPC_CTRL_D_03	2016-07-21_CHOLPC_CTRL_E_01	2016-07-21_CHOLPC_CTRL_E_02
1	Apolipoprotein B-100 OS=Homo sapiens GN=APOB PE=1 SV=2	APOB_HUMAN	516	7.04	Homo Sapiens	81	79	79	79	86	81	66	80	78	391	382	339	272	307	297	0.21	0.19	0.19	0.21	0.22	0.21	0.15	0.19	0.19	0.61	0.63	0.57	0.49	0.53	0.49	75	72	73	76	79	75	57	73	75	226	229	214	184	198
2	Serum albumin OS=Homo sapiens GN=ALB PE=1 SV=2	ALBU_HUMAN	69	6.21	Homo Sapiens	157	147	156	255	252	252	315	311	292	255	229	326	241	264	277	0.91	0.92	0.93	0.85	0.86	0.86	0.94	0.94	0.94	0.78	0.76	0.81	0.78	0.78	0.8	81	81	85	76	74	73	98	92	91	57	57	69	61	59
3	Complement C3 OS=Homo sapiens GN=C3 PE=1 SV=2	CO3_HUMAN	187	6.34	Homo Sapiens	189	167	154	267	280	300	161	156	147	447	390	297	252	295	281	0.65	0.59	0.55	0.76	0.74	0.79	0.59	0.57	0.54	0.74	0.77	0.74	0.67	0.75	0.71	98	91	88	121	121	129	96	92	86	106	113	107	98	106
4	Complement C4-B OS=Homo sapiens GN=C4B PE=1 SV=2	CO4B_HUMAN	193	7.28	Homo Sapiens	79	87	86	125	126	126	83	74	74	137	142	117	102	111	112	0.42	0.5	0.47	0.53	0.56	0.53	0.47	0.45	0.42	0.54	0.55	0.49	0.48	0.5	0.49	59	64	63	77	78	81	66	59	59	69	72	65	65	66
5	Apolipoprotein A-I OS=Homo sapiens GN=APOA1 PE=1 SV=1	APOA1_HUMAN	31	5.5	Homo Sapiens	49	47	46	46	45	47	71	61	64	51	55	51	44	40	43	0.76	0.79	0.71	0.73	0.74	0.71	0.78	0.77	0.77	0.7	0.73	0.74	0.71	0.71	0.71	30	32	30	28	26	26	35	34	34	26	29	25	23	22
6	Keratin, type II cytoskeletal 1 OS=Homo sapiens GN=KRT1 PE=1 SV=6	K2C1_HUMAN	66	8.33	Homo Sapiens	71	82	76	96	98	101	81	75	68	180	163	104	97	103	116	0.56	0.63	0.61	0.7	0.67	0.68	0.62	0.61	0.62	0.73	0.71	0.62	0.63	0.67	0.68	46	50	49	52	49	50	47	48	44	57	56	41	43	38
7	Alpha-2-macroglobulin OS=Homo sapiens GN=A2M PE=1 SV=3	A2MG_HUMAN	163	6.43	Homo Sapiens	12	11	11	24	20	31	32	32	33	63	58	75	53	60	63	0.14	0.12	0.1	0.22	0.18	0.26	0.27	0.22	0.28	0.52	0.47	0.46	0.34	0.44	0.43	11	10	10	23	19	26	30	25	32	48	45	48	36	44
8	Myosin-9 OS=Homo sapiens GN=MYH9 PE=1 SV=4	MYH9_HUMAN	227	5.29	Homo Sapiens	123	117	118	146	131	148	94	98	84	153	154	135	127	131	124	0.47	0.46	0.48	0.62	0.58	0.61	0.44	0.44	0.39	0.56	0.54	0.51	0.5	0.51	0.49	98	97	92	114	109	120	79	82	77	106	102	99	96	102
9	Serotransferrin OS=Homo sapiens GN=TF PE=1 SV=3	TRFE_HUMAN	77	7.13	Homo Sapiens	30	34	31	43	48	43	67	67	66	45	46	57	46	58	55	0.47	0.53	0.45	0.53	0.56	0.55	0.59	0.63	0.62	0.6	0.54	0.55	0.48	0.56	0.55	27	29	24	31	38	35	46	45	44	35	34	35	34	38
10	Fibrinogen alpha chain OS=Homo sapiens GN=FGA PE=1 SV=2	FIBA_HUMAN	95	5.87	Homo Sapiens	124	120	115	120	121	126	115	109	116	99	89	94	74	83	85	0.44	0.4	0.46	0.46	0.45	0.43	0.42	0.4	0.44	0.4	0.37	0.36	0.35	0.38	0.37	46	47	44	46	45	42	45	42	48	31	32	28	27	30
11	Apolipoprotein(a) OS=Homo sapiens GN=LPA PE=1 SV=1	APOA_HUMAN	501	5.77	Homo Sapiens	30	30	27	31	30	29	20	19	25	73	75	74	68	68	73	0.053	0.056	0.051	0.059	0.067	0.062	0.041	0.035	0.044	0.13	0.13	0.12	0.12	0.12	0.12	20	22	19	21	24	21	17	14	16	46	45	43	43	42
12	Apolipoprotein E OS=Homo sapiens GN=APOE PE=1 SV=1	APOE_HUMAN	36	5.42	Homo Sapiens	38	43	45	53	51	52	45	42	41	60	51	58	49	54	51	0.66	0.68	0.72	0.78	0.68	0.78	0.7	0.68	0.61	0.68	0.66	0.64	0.64	0.63	0.62	24	27	28	28	22	27	25	26	21	22	21	19	22	23
13	Fibrinogen beta chain OS=Homo sapiens GN=FGB PE=1 SV=2	FIBB_HUMAN	56	8.38	Homo Sapiens	82	87	84	116	121	115	90	85	78	111	109	105	80	96	86	0.71	0.8	0.69	0.73	0.75	0.75	0.7	0.72	0.75	0.71	0.7	0.7	0.71	0.69	0.69	44	48	42	39	41	42	43	43	39	34	32	32	29	30
14	Filamin-A OS=Homo sapiens GN=FLN.A. PE=1 SV=4	FLN.A._HUMAN	281	5.95	Homo Sapiens	56	67	63	82	84	92	38	33	43	93	103	88	79	79	89	0.25	0.26	0.28	0.38	0.39	0.35	0.18	0.17	0.18	0.44	0.45	0.39	0.34	0.38	0.4	47	52	50	71	71	71	33	30	34	73	79	74	64	70
15	Keratin, type I cytoskeletal 9 OS=Homo sapiens GN=KRT9 PE=1 SV=3	K1C9_HUMAN	62	4.89	Homo Sapiens	71	64	65	74	72	69	69	64	69	128	126	70	56	69	64	0.77	0.79	0.79	0.78	0.79	0.8	0.8	0.78	0.74	0.83	0.79	0.68	0.65	0.6	0.64	36	33	30	38	41	39	32	32	32	42	43	34	30	31
16	Alpha-1-antitrypsin OS=Homo sapiens GN=SERPIN.A.1 PE=1 SV=3	A1AT_HUMAN	47	5.31	Homo Sapiens	15	15	16	28	27	25	32	33	29	38	35	44	34	36	41	0.34	0.39	0.39	0.52	0.49	0.47	0.55	0.54	0.54	0.6	0.59	0.53	0.49	0.45	0.55	13	13	13	19	20	18	24	23	21	24	23	24	21	21
17	Haptoglobin OS=Homo sapiens GN=HP PE=1 SV=1	HPT_HUMAN	45	6.56	Homo Sapiens	17	15	16	21	20	19	30	27	28	34	29	34	30	34	31	0.44	0.36	0.32	0.54	0.51	0.47	0.57	0.51	0.51	0.59	0.48	0.5	0.52	0.57	0.5	14	12	12	18	18	16	23	20	24	20	20	21	21	25
18	Talin-1 OS=Homo sapiens GN=TLN1 PE=1 SV=3	TLN1_HUMAN	270	5.94	Homo Sapiens	72	69	70	79	72	81	46	52	50	89	95	76	67	76	69	0.31	0.31	0.32	0.39	0.35	0.39	0.21	0.25	0.24	0.43	0.43	0.35	0.31	0.36	0.34	57	58	60	67	61	69	39	46	45	71	72	61	53	60
19	Ig gamma-1 chain C region OS=Homo sapiens GN=IGHG1 PE=1 SV=1	IGHG1_HUMAN	36	8.31	Homo Sapiens	16	16	11	32	29	30	24	24	26	40	37	40	30	39	36	0.5	0.55	0.38	0.57	0.57	0.57	0.62	0.53	0.62	0.62	0.53	0.52	0.44	0.49	0.48	13	14	9	14	14	16	17	17	19	16	16	14	13	15
20	Complement factor H OS=Homo sapiens GN=CFH PE=1 SV=4	CFAH_HUMAN	139	6.59	Homo Sapiens	41	32	33	43	51	54	34	35	44	81	88	98	65	77	80	0.38	0.29	0.31	0.38	0.45	0.39	0.3	0.31	0.32	0.58	0.6	0.61	0.38	0.55	0.49	36	29	30	33	40	38	30	29	35	49	52	58	38	48
21	Fibronectin OS=Homo sapiens GN=FN1 PE=1 SV=4	FINC_HUMAN	263	5.45	Homo Sapiens	19	15	15	24	29	26	14	12	13	66	63	57	51	57	55	0.095	0.091	0.078	0.14	0.15	0.16	0.083	0.064	0.067	0.34	0.32	0.27	0.25	0.28	0.26	17	15	14	23	26	26	14	11	12	52	51	43	38	43
22	Fibrinogen gamma chain OS=Homo sapiens GN=FGG PE=1 SV=3	FIBG_HUMAN	52	5.32	Homo Sapiens	56	59	47	66	71	69	56	53	53	78	74	75	65	62	69	0.55	0.58	0.58	0.69	0.7	0.69	0.54	0.59	0.54	0.69	0.69	0.68	0.65	0.64	0.63	32	31	29	29	30	29	31	31	28	29	28	26	25	24
23	C4b-binding protein alpha chain OS=Homo sapiens GN=C4BPA PE=1 SV=2	C4BPA_HUMAN	67	7.31	Homo Sapiens	28	32	28	71	68	63	34	32	37	60	62	64	49	56	54	0.43	0.46	0.42	0.55	0.6	0.6	0.51	0.45	0.46	0.49	0.58	0.44	0.39	0.51	0.46	22	22	20	29	28	27	26	24	25	21	25	22	19	23
24	Ig mu chain C region OS=Homo sapiens GN=IGHM PE=1 SV=3	IGHM_HUMAN	49	6.77	Homo Sapiens	40	37	37	69	72	72	45	41	42	50	45	38	28	31	34	0.53	0.54	0.53	0.56	0.56	0.58	0.49	0.54	0.56	0.5	0.48	0.4	0.38	0.38	0.43	24	21	24	27	27	25	22	23	26	17	16	15	14	14
25	Apolipoprotein A-IV OS=Homo sapiens GN=APOA4 PE=1 SV=3	APOA4_HUMAN	45	5.05	Homo Sapiens	29	23	18	31	27	29	32	26	27	32	29	32	24	25	29	0.61	0.44	0.43	0.57	0.59	0.54	0.65	0.53	0.58	0.62	0.55	0.54	0.51	0.46	0.52	24	19	17	25	24	25	27	22	24	21	20	23	18	18
26	Complement component C9 OS=Homo sapiens GN=C9 PE=1 SV=2	CO9_HUMAN	63	5.27	Homo Sapiens	31	35	27	43	38	44	22	23	26	37	47	40	37	35	36	0.43	0.43	0.38	0.44	0.36	0.4	0.3	0.41	0.45	0.49	0.49	0.43	0.4	0.4	0.39	24	24	20	25	23	25	19	20	22	21	23	19	21	19
27	Clusterin OS=Homo sapiens GN=CLU PE=1 SV=1	CLUS_HUMAN	52	6.21	Homo Sapiens	28	28	30	23	28	21	30	23	23	39	36	28	26	25	29	0.36	0.33	0.35	0.36	0.41	0.32	0.4	0.42	0.35	0.33	0.33	0.32	0.29	0.27	0.34	20	17	20	14	18	14	23	17	18	18	18	15	16	15
28	Actin, cytoplasmic 1 OS=Homo sapiens GN=ACTB PE=1 SV=1	ACTB_HUMAN	42	5.15	Homo Sapiens	47	52	52	44	46	43	36	32	33	47	46	38	32	34	40	0.54	0.57	0.64	0.72	0.78	0.81	0.68	0.66	0.57	0.75	0.75	0.75	0.56	0.62	0.77	17	20	21	24	24	26	20	19	18	20	20	19	15	16
29	Keratin, type I cytoskeletal 10 OS=Homo sapiens GN=KRT10 PE=1 SV=6	K1C10_HUMAN	59	4.88	Homo Sapiens	20	21	19	32	35	34	16	19	20	75	83	47	49	57	48	0.31	0.31	0.36	0.48	0.54	0.51	0.29	0.29	0.39	0.61	0.6	0.51	0.55	0.57	0.52	17	17	18	24	25	24	16	16	19	34	34	29	30	31
30	Keratin, type II cytoskeletal 2 epidermal OS=Homo sapiens GN=KRT2 PE=1 SV=2	K22E_HUMAN	65	8.17	Homo Sapiens	40	42	43	37	41	38	33	26	27	83	87	55	46	50	46	0.57	0.54	0.58	0.52	0.53	0.49	0.49	0.35	0.41	0.75	0.82	0.58	0.61	0.61	0.59	31	31	32	27	28	26	21	19	18	37	41	28	31	29
31	Ig kappa chain C region OS=Homo sapiens GN=IGKC PE=1 SV=1	IGKC_HUMAN	12	5.68	Homo Sapiens	17	20	18	22	27	27	21	19	20	37	35	38	26	30	30	0.9	0.9	0.9	0.93	0.82	0.87	0.93	0.91	0.91	0.86	0.82	0.87	0.82	0.82	0.82	11	10	9	8	7	8	9	9	10	8	7	8	6	7
32	Complement C5 OS=Homo sapiens GN=C5 PE=1 SV=4	CO5_HUMAN	188	6.49	Homo Sapiens	6	7	3	25	30	37	6	6	7	51	52	31	33	33	35	0.044	0.047	0.027	0.18	0.23	0.26	0.045	0.047	0.047	0.35	0.33	0.2	0.21	0.21	0.25	5	6	3	23	28	36	6	6	6	41	43	27	30	28
33	Ig alpha-1 chain C region OS=Homo sapiens GN=IGHA1 PE=1 SV=2	IGHA1_HUMAN	38	6.49	Homo Sapiens	18	16	16	18	12	18	14	18	17	16	18	22	15	15	19	0.38	0.36	0.49	0.44	0.44	0.59	0.4	0.45	0.45	0.48	0.43	0.61	0.32	0.32	0.45	12	11	13	12	10	14	11	15	14	9	10	14	9	9
34	Thrombospondin-1 OS=Homo sapiens GN=THBS1 PE=1 SV=2	TSP1_HUMAN	129	4.51	Homo Sapiens	22	21	21	38	40	40	23	19	21	49	46	46	35	44	41	0.16	0.17	0.18	0.32	0.33	0.35	0.2	0.17	0.17	0.47	0.49	0.46	0.33	0.45	0.39	19	19	19	33	35	35	19	17	18	35	38	36	28	34
35	Plasminogen OS=Homo sapiens GN=PLG PE=1 SV=2	PLMN_HUMAN	91	7.25	Homo Sapiens	10	10	12	23	28	28	12	10	10	43	43	35	31	33	29	0.15	0.19	0.19	0.39	0.37	0.41	0.21	0.19	0.18	0.57	0.55	0.51	0.44	0.42	0.44	8	8	8	19	22	25	12	9	9	30	32	26	23	23
36	Inter-alpha-trypsin inhibitor heavy chain H2 OS=Homo sapiens GN=ITIH2 PE=1 SV=2	ITIH2_HUMAN	106	6.85	Homo Sapiens	11	14	18	12	12	16	17	16	14	39	37	30	27	26	29	0.13	0.16	0.18	0.12	0.12	0.21	0.2	0.17	0.18	0.38	0.38	0.33	0.32	0.29	0.33	11	12	15	9	11	15	16	14	13	24	26	20	21	21
37	von Willebrand factor OS=Homo sapiens GN=VWF PE=1 SV=4	VWF_HUMAN	309	5.15	Homo Sapiens	6	12	13	15	16	15	6	6	3	36	41	26	21	26	29	0.034	0.065	0.079	0.077	0.073	0.073	0.031	0.029	0.016	0.15	0.16	0.11	0.1	0.11	0.13	6	12	13	15	16	15	5	5	3	32	36	23	20	24
38	Inter-alpha-trypsin inhibitor heavy chain H4 OS=Homo sapiens GN=ITIH4 PE=1 SV=4	ITIH4_HUMAN	103	6.97	Homo Sapiens	9	8	10	11	9	13	13	12	15	31	37	29	22	31	27	0.14	0.13	0.14	0.17	0.13	0.21	0.12	0.11	0.14	0.4	0.42	0.28	0.28	0.31	0.33	9	8	10	10	8	11	10	10	12	24	24	19	18	21
39	Gelsolin OS=Homo sapiens GN=GSN PE=1 SV=1	GELS_HUMAN	86	6.19	Homo Sapiens	20	19	22	28	31	26	20	17	20	55	61	43	33	34	33	0.38	0.41	0.34	0.42	0.46	0.38	0.3	0.29	0.34	0.56	0.56	0.47	0.42	0.46	0.43	18	17	17	21	23	19	18	16	17	31	30	25	22	22
40	Ceruloplasmin OS=Homo sapiens GN=CP PE=1 SV=1	CERU_HUMAN	122	5.5	Homo Sapiens	2	2	0	9	8	9	9	12	12	18	19	20	14	14	16	0.036	0.039	0	0.11	0.12	0.14	0.073	0.095	0.095	0.2	0.19	0.23	0.17	0.19	0.18	2	2	0	7	7	8	5	7	6	15	15	17	11	13
41	Coagulation factor V OS=Homo sapiens GN=F5 PE=1 SV=4	FA5_HUMAN	252	5.95	Homo Sapiens	17	19	21	30	30	32	12	12	13	42	36	29	28	34	35	0.11	0.12	0.12	0.15	0.17	0.18	0.062	0.064	0.082	0.21	0.21	0.16	0.17	0.18	0.19	15	16	19	25	28	28	11	11	12	36	35	27	27	32
42	Vitamin D-binding protein OS=Homo sapiens GN=GC PE=1 SV=1	VTDB_HUMAN	53	5.21	Homo Sapiens	6	6	4	11	17	12	10	13	11	19	22	24	16	24	23	0.19	0.2	0.14	0.3	0.34	0.36	0.28	0.3	0.3	0.47	0.58	0.58	0.43	0.49	0.53	5	6	4	9	14	11	9	11	11	15	18	20	16	20
43	Prothrombin OS=Homo sapiens GN=F2 PE=1 SV=2	THRB_HUMAN	70	5.7	Homo Sapiens	5	4	6	8	13	10	7	6	7	26	29	27	28	24	23	0.14	0.12	0.16	0.18	0.34	0.26	0.21	0.16	0.18	0.45	0.47	0.44	0.45	0.41	0.39	5	4	6	8	13	10	7	6	7	21	22	22	23	21
44	Lipopolysaccharide-binding protein OS=Homo sapiens GN=LBP PE=1 SV=3	LBP_HUMAN	53	6.68	Homo Sapiens	13	15	14	13	16	11	9	9	10	24	25	18	18	22	19	0.22	0.22	0.24	0.27	0.25	0.2	0.16	0.21	0.16	0.38	0.39	0.28	0.28	0.32	0.37	11	12	12	11	13	11	8	8	8	15	16	12	11	13
45	Keratin, type I cytoskeletal 16 OS=Homo sapiens GN=KRT16 PE=1 SV=4	K1C16_HUMAN	51	4.69	Homo Sapiens	20	20	21	29	35	31	20	14	15	51	52	48	40	46	50	0.33	0.33	0.34	0.4	0.51	0.49	0.42	0.25	0.27	0.67	0.66	0.64	0.65	0.67	0.67	13	13	13	16	20	19	14	8	9	27	26	26	24	26
46	Serum amyloid A-2 protein OS=Homo sapiens GN=SAA2 PE=1 SV=1	SAA2_HUMAN	14	9.48	Homo Sapiens	0	0	0	0	0	0	0	0	0	3	2	3	3	2	4	0	0	0	0	0	0	0	0	0	0.25	0.22	0.24	0.2	0.13	0.35	0	0	0	0	0	0	0	0	0	2	2	3	3	2
47	Apolipoprotein C-III OS=Homo sapiens GN=APOC3 PE=1 SV=1	APOC3_HUMAN	11	5.04	Homo Sapiens	25	27	24	23	28	25	26	31	26	26	25	22	17	21	17	0.43	0.63	0.43	0.59	0.59	0.73	0.43	0.63	0.43	0.61	0.61	0.59	0.56	0.55	0.54	6	7	6	7	7	8	7	8	7	7	6	7	4	6
48	Integrin alpha-IIb OS=Homo sapiens GN=ITGA2B PE=1 SV=3	ITA2B_HUMAN	113	5.03	Homo Sapiens	24	25	23	32	30	33	20	21	20	43	45	44	39	41	40	0.29	0.29	0.3	0.39	0.34	0.36	0.24	0.28	0.25	0.4	0.41	0.4	0.38	0.39	0.39	23	20	21	28	25	26	17	21	18	32	35	34	31	31
49	Integrin beta-3 OS=Homo sapiens GN=ITGB3 PE=1 SV=2	ITB3_HUMAN	87	4.85	Homo Sapiens	21	18	21	33	33	29	20	14	19	38	48	40	33	35	37	0.27	0.17	0.24	0.43	0.41	0.37	0.22	0.18	0.22	0.42	0.47	0.43	0.36	0.38	0.41	16	12	16	24	25	24	14	10	14	23	29	25	22	23
50	Ig gamma-3 chain C region OS=Homo sapiens GN=IGHG3 PE=1 SV=2	IGHG3_HUMAN	41	7.95	Homo Sapiens	18	19	15	34	38	40	34	28	28	33	26	33	27	31	31	0.4	0.46	0.39	0.51	0.53	0.52	0.55	0.5	0.51	0.52	0.47	0.49	0.44	0.48	0.48	6	6	5	8	8	9	7	6	6	7	6	7	6	6
51	Kininogen-1 OS=Homo sapiens GN=KNG1 PE=1 SV=2	KNG1_HUMAN	72	6.8	Homo Sapiens	14	15	13	23	20	22	14	16	18	15	21	18	14	16	17	0.22	0.28	0.22	0.36	0.33	0.36	0.23	0.25	0.26	0.3	0.34	0.28	0.23	0.35	0.29	11	14	11	19	18	19	13	14	17	15	18	16	13	16
52	Ig lambda-2 chain C regions OS=Homo sapiens GN=IGLC2 PE=1 SV=1	LAC2_HUMAN	11	7.34	Homo Sapiens	12	13	12	19	19	14	20	15	15	12	13	15	11	12	15	0.72	0.86	0.72	0.75	0.75	0.75	0.86	0.86	0.72	0.75	0.75	0.75	0.6	0.75	0.75	8	8	8	5	5	5	9	9	8	5	5	5	5	5
53	Hornerin OS=Homo sapiens GN=HRNR PE=1 SV=2	HORN_HUMAN	282	10.24	Homo Sapiens	32	30	26	24	23	28	34	29	31	49	40	24	12	17	21	0.16	0.15	0.15	0.14	0.13	0.14	0.14	0.12	0.16	0.18	0.16	0.13	0.095	0.097	0.13	20	20	17	17	15	17	19	17	19	25	19	15	11	12
54	Apolipoprotein A-II OS=Homo sapiens GN=APOA2 PE=1 SV=1	APOA2_HUMAN	11	6.6	Homo Sapiens	14	16	16	15	13	14	14	14	13	19	17	14	12	14	12	0.74	0.74	0.74	0.69	0.69	0.69	0.69	0.69	0.49	0.69	0.69	0.69	0.69	0.69	0.69	8	9	8	8	7	8	8	7	7	7	7	7	6	7
55	Vitronectin OS=Homo sapiens GN=VTN PE=1 SV=1	VTNC_HUMAN	54	5.54	Homo Sapiens	9	9	9	14	12	11	10	7	12	18	14	11	13	10	15	0.14	0.18	0.18	0.28	0.23	0.23	0.22	0.15	0.22	0.26	0.22	0.24	0.22	0.16	0.22	6	7	6	12	8	8	10	6	9	11	7	8	8	7
56	Apolipoprotein D OS=Homo sapiens GN=APOD PE=1 SV=1	APOD_HUMAN	21	4.79	Homo Sapiens	7	8	6	5	4	4	9	8	8	14	12	16	13	13	13	0.28	0.32	0.28	0.22	0.22	0.2	0.32	0.32	0.32	0.31	0.31	0.35	0.35	0.25	0.31	6	7	6	5	4	4	8	7	8	6	6	7	7	5
57	Inter-alpha-trypsin inhibitor heavy chain H1 OS=Homo sapiens GN=ITIH1 PE=1 SV=3	ITIH1_HUMAN	101	6.78	Homo Sapiens	4	6	4	10	8	8	6	4	6	38	34	26	22	27	26	0.049	0.078	0.056	0.15	0.11	0.12	0.075	0.056	0.092	0.37	0.36	0.29	0.25	0.29	0.3	4	6	4	10	8	8	6	4	6	23	23	19	17	20
58	Complement factor B OS=Homo sapiens GN=CFB PE=1 SV=2	CFAB_HUMAN	86	7.07	Homo Sapiens	8	5	4	7	6	10	8	10	10	14	14	15	13	15	16	0.14	0.1	0.055	0.12	0.097	0.17	0.13	0.17	0.16	0.23	0.18	0.24	0.19	0.2	0.22	7	5	3	6	6	10	7	9	9	14	11	15	12	14
59	Hemopexin OS=Homo sapiens GN=HPX PE=1 SV=2	HEMO_HUMAN	52	7.02	Homo Sapiens	6	4	6	6	6	8	15	13	15	11	12	15	12	13	13	0.23	0.13	0.21	0.18	0.24	0.28	0.27	0.3	0.29	0.33	0.37	0.41	0.36	0.33	0.45	6	4	5	5	6	7	11	11	10	8	9	11	9	8
60	Ig gamma-2 chain C region OS=Homo sapiens GN=IGHG2 PE=1 SV=2	IGHG2_HUMAN	36	7.66	Homo Sapiens	16	15	16	41	45	43	34	25	25	27	26	38	30	33	32	0.35	0.4	0.38	0.54	0.54	0.54	0.54	0.46	0.53	0.48	0.4	0.5	0.45	0.48	0.4	5	3	6	6	6	6	6	5	5	4	5	7	5	6
61	Beta-2-glycoprotein 1 OS=Homo sapiens GN=APOH PE=1 SV=3	APOH_HUMAN	38	8.03	Homo Sapiens	10	12	16	11	14	14	8	6	8	16	15	19	12	12	14	0.29	0.36	0.4	0.39	0.37	0.51	0.3	0.18	0.21	0.41	0.41	0.43	0.35	0.33	0.37	7	9	12	9	10	12	6	5	6	11	11	12	9	8
62	Histidine-rich glycoprotein OS=Homo sapiens GN=HRG PE=1 SV=1	HRG_HUMAN	60	7.52	Homo Sapiens	14	10	10	25	22	22	13	9	13	40	33	35	32	32	36	0.32	0.22	0.19	0.37	0.35	0.38	0.29	0.18	0.3	0.52	0.49	0.51	0.47	0.56	0.52	13	10	10	18	16	17	13	9	13	19	18	18	17	20
63	Alpha-2-HS-glycoprotein OS=Homo sapiens GN=AHSG PE=1 SV=1	FETUA_HUMAN	39	5.52	Homo Sapiens	18	18	16	23	20	19	21	21	20	20	21	20	15	18	19	0.36	0.33	0.31	0.53	0.41	0.47	0.38	0.35	0.35	0.46	0.33	0.33	0.31	0.31	0.23	10	10	10	14	11	12	11	12	10	10	9	7	8	8
64	Apolipoprotein L1 OS=Homo sapiens GN=APOL1 PE=1 SV=5	APOL1_HUMAN	44	5.55	Homo Sapiens	3	4	4	7	7	6	6	4	3	11	9	6	4	9	8	0.11	0.11	0.11	0.18	0.24	0.24	0.15	0.11	0.11	0.27	0.29	0.24	0.12	0.27	0.23	3	4	4	7	7	6	6	4	3	7	8	6	4	8
65	Heparin cofactor 2 OS=Homo sapiens GN=SERPIND1 PE=1 SV=3	HEP2_HUMAN	57	6.89	Homo Sapiens	12	9	12	8	10	8	8	12	9	34	32	28	26	28	25	0.19	0.15	0.18	0.16	0.16	0.14	0.16	0.18	0.14	0.51	0.54	0.45	0.43	0.45	0.44	11	8	10	7	8	6	8	9	8	22	21	19	18	18
66	Keratin, type II cytoskeletal 6C OS=Homo sapiens GN=KRT6C PE=1 SV=3	K2C6C_HUMAN	60	8.16	Homo Sapiens	19	18	20	24	20	23	15	17	17	48	46	39	42	42	41	0.29	0.27	0.29	0.37	0.31	0.39	0.25	0.27	0.29	0.54	0.52	0.5	0.55	0.56	0.58	12	11	12	16	11	13	9	11	9	28	25	22	24	27
67	Serum paraoxoN.A.se/arylesterase 1 OS=Homo sapiens GN=PON1 PE=1 SV=3	PON1_HUMAN	40	4.89	Homo Sapiens	8	9	5	6	4	6	5	6	6	15	15	11	11	10	10	0.31	0.31	0.21	0.32	0.14	0.2	0.21	0.21	0.28	0.54	0.43	0.42	0.42	0.34	0.33	8	9	5	6	4	5	5	6	6	12	11	9	9	8
68	Complement component C6 OS=Homo sapiens GN=C6 PE=1 SV=3	CO6_HUMAN	105	6.74	Homo Sapiens	13	9	14	22	17	19	12	12	11	30	24	25	22	25	24	0.16	0.14	0.17	0.25	0.21	0.22	0.14	0.15	0.13	0.36	0.29	0.29	0.28	0.3	0.27	12	9	13	16	14	15	10	12	10	25	20	22	21	20
69	Hemoglobin subunit beta OS=Homo sapiens GN=HBB PE=1 SV=2	HBB_HUMAN	16	7.32	Homo Sapiens	16	9	15	15	14	15	13	13	13	11	15	13	12	14	15	0.69	0.51	0.7	0.82	0.76	0.95	0.71	0.69	0.69	0.76	0.82	0.93	0.82	0.82	0.94	11	8	11	10	9	12	9	9	9	9	10	11	9	10
70	Complement C1r subcomponent OS=Homo sapiens GN=C1R PE=1 SV=2	C1R_HUMAN	80	6.14	Homo Sapiens	6	4	3	9	6	8	3	6	4	13	14	13	10	8	11	0.12	0.095	0.058	0.13	0.12	0.11	0.055	0.099	0.057	0.27	0.26	0.24	0.16	0.17	0.17	6	4	3	9	6	8	3	6	4	12	12	12	10	8
71	Spectrin alpha chain, erythrocytic 1 OS=Homo sapiens GN=SPTA1 PE=1 SV=5	SPTA1_HUMAN	280	4.69	Homo Sapiens	0	2	0	0	0	2	0	0	0	9	14	10	6	12	9	0	0.0099	0	0	0	0.01	0	0	0	0.045	0.074	0.054	0.033	0.06	0.04	0	2	0	0	0	2	0	0	0	8	14	10	6	10
72	Alpha-1-antichymotrypsin OS=Homo sapiens GN=SERPIN.A.3 PE=1 SV=2	AACT_HUMAN	48	5.19	Homo Sapiens	6	4	0	3	4	6	7	8	5	9	14	17	10	9	11	0.16	0.14	0	0.12	0.12	0.16	0.18	0.22	0.16	0.3	0.35	0.4	0.32	0.28	0.28	6	4	0	3	4	6	7	8	5	8	11	14	10	9
73	Vitamin K-dependent protein S OS=Homo sapiens GN=PROS1 PE=1 SV=1	PROS_HUMAN	75	5.37	Homo Sapiens	7	7	8	15	14	19	9	4	11	22	24	15	13	17	16	0.16	0.17	0.19	0.29	0.26	0.33	0.15	0.086	0.19	0.31	0.45	0.23	0.2	0.27	0.28	7	7	8	14	13	17	9	4	10	15	21	13	12	14
74	Band 3 anion transport protein OS=Homo sapiens GN=SLC4A1 PE=1 SV=3	B3AT_HUMAN	102	4.84	Homo Sapiens	4	3	5	11	7	11	4	4	5	17	17	14	13	15	14	0.066	0.046	0.046	0.17	0.092	0.2	0.06	0.06	0.06	0.22	0.2	0.22	0.18	0.21	0.18	4	3	3	9	6	11	4	4	4	13	13	13	10	12
75	Serum amyloid A-4 protein OS=Homo sapiens GN=SAA4 PE=1 SV=2	SAA4_HUMAN	15	9.38	Homo Sapiens	5	5	6	2	3	4	3	3	6	10	5	5	9	4	4	0.25	0.3	0.25	0.18	0.27	0.33	0.22	0.28	0.36	0.35	0.18	0.35	0.35	0.27	0.18	4	4	4	2	3	4	3	3	5	4	2	4	4	3
76	Complement component C8 beta chain OS=Homo sapiens GN=C8B PE=1 SV=3	CO8B_HUMAN	67	8.17	Homo Sapiens	6	4	5	12	13	12	4	2	3	29	31	23	19	24	19	0.093	0.091	0.088	0.25	0.2	0.31	0.086	0.052	0.091	0.46	0.55	0.31	0.28	0.33	0.31	4	4	4	9	10	11	3	2	3	21	23	14	14	16
77	Hemoglobin subunit alpha OS=Homo sapiens GN=HBA1 PE=1 SV=2	HBA_HUMAN	15	9.09	Homo Sapiens	12	9	11	12	14	11	7	8	7	9	13	12	9	5	13	0.89	0.75	0.68	0.92	0.85	0.85	0.39	0.61	0.55	0.51	0.85	0.85	0.58	0.66	0.65	10	7	7	9	9	7	5	6	5	5	8	8	6	5
78	Vinculin OS=Homo sapiens GN=VCL PE=1 SV=4	VINC_HUMAN	124	5.33	Homo Sapiens	12	12	12	26	33	30	7	9	9	32	30	31	28	26	32	0.14	0.13	0.13	0.3	0.38	0.32	0.092	0.11	0.12	0.33	0.33	0.31	0.29	0.28	0.33	11	10	11	25	32	27	7	9	9	28	28	29	26	24
79	Alpha-1-acid glycoprotein 1 OS=Homo sapiens GN=ORM1 PE=1 SV=1	A1AG1_HUMAN	24	4.66	Homo Sapiens	6	6	3	6	7	7	8	5	9	8	11	9	7	7	9	0.23	0.23	0.12	0.29	0.29	0.29	0.3	0.23	0.31	0.41	0.41	0.41	0.36	0.34	0.41	5	5	2	5	6	6	7	5	7	7	9	8	6	6
80	Spectrin beta chain, erythrocytic OS=Homo sapiens GN=SPTB PE=1 SV=5	SPTB1_HUMAN	246	4.92	Homo Sapiens	3	3	3	2	2	2	0	0	0	7	8	6	5	5	6	0.022	0.022	0.022	0.013	0.013	0.012	0	0	0	0.038	0.059	0.041	0.038	0.032	0.029	3	3	3	2	2	2	0	0	0	6	8	6	5	5
81	Multimerin-1 OS=Homo sapiens GN=MMRN1 PE=1 SV=3	MMRN1_HUMAN	138	8.01	Homo Sapiens	10	10	10	12	12	12	8	7	6	19	19	15	16	16	16	0.1	0.11	0.11	0.14	0.13	0.14	0.11	0.073	0.073	0.2	0.18	0.16	0.16	0.15	0.17	8	9	9	12	11	12	8	6	5	18	17	15	15	13
82	Erythrocyte band 7 integral membrane protein OS=Homo sapiens GN=STOM PE=1 SV=3	STOM_HUMAN	32	8.07	Homo Sapiens	11	8	10	10	9	11	7	8	8	12	11	9	10	9	11	0.36	0.29	0.26	0.33	0.36	0.4	0.27	0.25	0.25	0.55	0.44	0.36	0.32	0.3	0.38	9	6	7	8	8	9	6	6	6	10	9	7	7	6
83	Alpha-actinin-1 OS=Homo sapiens GN=ACTN1 PE=1 SV=2	ACTN1_HUMAN	103	5.07	Homo Sapiens	10	12	9	14	18	18	3	3	3	29	27	24	23	20	25	0.14	0.18	0.15	0.24	0.28	0.28	0.045	0.041	0.044	0.41	0.43	0.29	0.33	0.25	0.3	10	12	9	14	18	18	3	3	3	27	26	22	22	20
84	Keratin, type II cytoskeletal 5 OS=Homo sapiens GN=KRT5 PE=1 SV=3	K2C5_HUMAN	62	7.91	Homo Sapiens	15	14	16	21	22	19	12	13	12	48	50	28	36	29	36	0.23	0.18	0.22	0.29	0.29	0.24	0.18	0.19	0.21	0.5	0.48	0.35	0.41	0.5	0.43	7	7	8	10	11	8	10	8	7	21	21	13	15	16
85	Complement C1s subcomponent OS=Homo sapiens GN=C1S PE=1 SV=1	C1S_HUMAN	77	4.59	Homo Sapiens	5	2	4	3	3	6	2	3	4	10	9	9	7	9	9	0.073	0.038	0.058	0.071	0.09	0.12	0.045	0.07	0.08	0.19	0.19	0.18	0.15	0.18	0.19	4	2	3	3	3	5	2	3	4	9	8	8	6	8
86	Platelet factor 4 OS=Homo sapiens GN=PF4 PE=1 SV=2	PLF4_HUMAN	11	8.78	Homo Sapiens	10	8	10	9	9	11	6	5	7	7	6	4	7	5	5	0.39	0.36	0.36	0.37	0.5	0.51	0.51	0.37	0.36	0.37	0.28	0.28	0.43	0.28	0.28	6	5	5	6	5	7	6	5	5	5	4	4	6	4
87	Complement component C7 OS=Homo sapiens GN=C7 PE=1 SV=2	CO7_HUMAN	94	6.44	Homo Sapiens	7	5	6	15	16	18	6	6	5	18	20	21	19	18	18	0.12	0.093	0.094	0.24	0.27	0.34	0.1	0.1	0.079	0.32	0.36	0.32	0.29	0.29	0.3	7	5	6	13	14	17	6	6	5	18	20	20	18	16
88	Properdin OS=Homo sapiens GN=CFP PE=1 SV=2	PROP_HUMAN	51	7.92	Homo Sapiens	19	15	21	29	28	25	15	18	19	20	26	18	17	21	21	0.26	0.24	0.25	0.3	0.3	0.28	0.22	0.25	0.28	0.27	0.29	0.27	0.27	0.27	0.27	10	9	10	13	12	12	7	10	9	9	11	10	9	9
89	Apolipoprotein C-II OS=Homo sapiens GN=APOC2 PE=1 SV=1	APOC2_HUMAN	11	4.36	Homo Sapiens	9	10	12	11	8	10	9	9	9	8	7	6	6	8	7	0.59	0.59	0.59	0.54	0.54	0.54	0.59	0.59	0.59	0.52	0.52	0.5	0.5	0.5	0.56	7	7	9	6	6	6	6	6	6	5	5	4	4	4
90	Glyceraldehyde-3-phosphate dehydrogeN.A.se OS=Homo sapiens GN=GAPDH PE=1 SV=3	G3P_HUMAN	36	8.73	Homo Sapiens	10	11	9	12	14	13	5	4	6	17	19	16	13	17	14	0.5	0.49	0.27	0.52	0.64	0.56	0.14	0.11	0.24	0.59	0.63	0.59	0.48	0.64	0.52	8	9	6	10	11	10	4	3	5	12	13	11	9	12
91	Protein AMBP OS=Homo sapiens GN=AMBP PE=1 SV=1	AMBP_HUMAN	39	6.15	Homo Sapiens	4	3	3	5	5	5	7	6	7	18	15	12	9	8	10	0.16	0.13	0.13	0.18	0.19	0.18	0.23	0.2	0.21	0.37	0.35	0.31	0.27	0.25	0.21	4	3	3	5	5	5	7	6	7	10	10	9	7	7
92	CD5 antigen-like OS=Homo sapiens GN=CD5L PE=1 SV=1	CD5L_HUMAN	38	5.15	Homo Sapiens	10	9	9	13	14	14	9	8	10	10	13	10	10	11	11	0.33	0.34	0.34	0.45	0.45	0.45	0.28	0.28	0.28	0.38	0.46	0.44	0.39	0.43	0.44	8	7	7	10	10	10	7	7	7	8	10	9	8	9
93	Apolipoprotein C-I OS=Homo sapiens GN=APOC1 PE=1 SV=1	APOC1_HUMAN	9	9.17	Homo Sapiens	6	8	5	8	5	8	4	6	5	7	8	8	7	6	7	0.48	0.48	0.4	0.35	0.35	0.4	0.4	0.54	0.31	0.27	0.27	0.4	0.52	0.4	0.27	5	6	4	5	5	5	4	6	5	2	3	4	5	4
94	Keratin, type I cytoskeletal 14 OS=Homo sapiens GN=KRT14 PE=1 SV=4	K1C14_HUMAN	52	4.81	Homo Sapiens	20	20	20	28	30	29	14	12	15	67	59	45	43	46	45	0.28	0.28	0.25	0.4	0.4	0.44	0.26	0.21	0.29	0.75	0.68	0.61	0.58	0.59	0.63	5	5	4	5	5	6	2	2	3	22	18	14	13	14
95	Fibulin-1 OS=Homo sapiens GN=FBLN1 PE=1 SV=4	FBLN1_HUMAN	77	4.86	Homo Sapiens	2	0	2	2	2	3	0	0	0	20	21	16	14	14	15	0.027	0	0.027	0.028	0.028	0.046	0	0	0	0.34	0.36	0.26	0.24	0.28	0.26	2	0	2	2	2	3	0	0	0	16	16	13	13	13
96	Serum amyloid A-1 protein OS=Homo sapiens GN=SAA1 PE=1 SV=1	SAA1_HUMAN	14	6.79	Homo Sapiens	2	0	0	0	0	0	0	0	0	6	6	4	4	3	5	0.34	0	0	0	0	0	0	0	0	0.41	0.41	0.3	0.37	0.3	0.41	2	0	0	0	0	0	0	0	0	3	3	3	3	3
97	Alpha-1B-glycoprotein OS=Homo sapiens GN=A1BG PE=1 SV=4	A1BG_HUMAN	54	5.71	Homo Sapiens	2	0	0	2	3	4	5	4	4	5	8	7	5	7	8	0.069	0	0	0.069	0.093	0.11	0.16	0.12	0.15	0.13	0.2	0.21	0.12	0.2	0.22	2	0	0	2	3	4	5	4	4	4	7	7	5	7
98	Ankyrin-1 OS=Homo sapiens GN=ANK1 PE=1 SV=3	ANK1_HUMAN	206	5.92	Homo Sapiens	3	2	2	2	5	5	0	0	0	5	4	5	6	7	7	0.027	0.013	0.013	0.013	0.044	0.045	0	0	0	0.035	0.039	0.038	0.045	0.048	0.055	3	2	2	2	5	5	0	0	0	5	4	5	6	6
99	Ficolin-3 OS=Homo sapiens GN=FCN3 PE=1 SV=2	FCN3_HUMAN	33	6.66	Homo Sapiens	0	0	0	0	0	0	0	0	0	0	0	6	0	0	0	0	0	0	0	0	0	0	0	0	0	0	0.2	0	0	0	0	0	0	0	0	0	0	0	0	0	0	3	0	0
100	Haptoglobin-related protein OS=Homo sapiens GN=HPR PE=2 SV=2	HPTR_HUMAN	39	7.11	Homo Sapiens	14	12	13	13	15	15	15	15	13	22	21	21	19	20	17	0.36	0.33	0.31	0.36	0.43	0.36	0.38	0.41	0.26	0.48	0.46	0.36	0.38	0.43	0.41	4	4	3	4	4	3	4	5	2	6	5	3	3	4
101	Complement component C8 alpha chain OS=Homo sapiens GN=C8A PE=1 SV=2	CO8A_HUMAN	65	6.41	Homo Sapiens	5	7	9	13	13	13	3	3	3	19	20	17	19	13	17	0.13	0.15	0.15	0.24	0.24	0.25	0.072	0.072	0.072	0.35	0.36	0.27	0.27	0.26	0.28	5	7	7	10	11	11	3	3	3	14	15	13	13	11
102	Tropomyosin alpha-4 chain OS=Homo sapiens GN=TPM4 PE=1 SV=3	TPM4_HUMAN	29	4.36	Homo Sapiens	12	14	15	9	13	13	6	5	7	16	15	15	15	12	14	0.33	0.51	0.51	0.37	0.47	0.42	0.25	0.26	0.25	0.48	0.4	0.38	0.35	0.34	0.4	9	13	11	9	12	12	6	5	6	12	13	12	12	10
103	Complement factor H-related protein 5 OS=Homo sapiens GN=CFHR5 PE=1 SV=1	FHR5_HUMAN	64	7.08	Homo Sapiens	7	7	6	20	19	15	5	6	6	14	15	16	11	13	14	0.15	0.14	0.097	0.32	0.29	0.25	0.084	0.11	0.12	0.24	0.31	0.23	0.13	0.15	0.16	6	6	4	14	12	10	4	5	5	9	10	10	6	6
104	Desmoplakin OS=Homo sapiens GN=DSP PE=1 SV=3	DESP_HUMAN	332	6.78	Homo Sapiens	6	2	2	6	7	7	7	9	5	31	29	16	9	13	17	0.029	0.011	0.01	0.023	0.028	0.026	0.026	0.038	0.017	0.11	0.092	0.057	0.033	0.046	0.065	6	2	2	6	7	7	7	9	5	30	24	16	9	13
105	Antithrombin-III OS=Homo sapiens GN=SERPINC1 PE=1 SV=1	ANT3_HUMAN	53	6.68	Homo Sapiens	2	0	0	3	5	4	2	3	0	6	9	8	7	6	10	0.086	0	0	0.086	0.17	0.13	0.06	0.11	0	0.18	0.24	0.21	0.21	0.15	0.23	2	0	0	3	5	4	2	3	0	6	8	8	7	6
106	Complement C1q subcomponent subunit B OS=Homo sapiens GN=C1QB PE=1 SV=3	C1QB_HUMAN	27	8.87	Homo Sapiens	9	6	6	8	11	9	2	3	3	9	8	7	5	5	5	0.19	0.2	0.16	0.24	0.32	0.29	0.079	0.15	0.19	0.35	0.35	0.26	0.17	0.17	0.17	5	5	5	6	6	6	2	3	3	5	5	4	3	3
107	Tubulin beta-1 chain OS=Homo sapiens GN=TUBB1 PE=1 SV=1	TBB1_HUMAN	50	4.82	Homo Sapiens	9	9	10	9	17	13	5	4	3	22	17	15	15	16	13	0.25	0.28	0.28	0.26	0.41	0.38	0.16	0.15	0.098	0.68	0.51	0.45	0.47	0.4	0.27	8	9	9	9	15	13	5	4	3	21	16	14	14	13
108	Complement C1q subcomponent subunit C OS=Homo sapiens GN=C1QC PE=1 SV=3	C1QC_HUMAN	26	8.58	Homo Sapiens	6	5	6	8	10	7	6	5	4	4	6	5	4	4	4	0.23	0.23	0.23	0.34	0.34	0.24	0.18	0.18	0.18	0.2	0.2	0.2	0.15	0.2	0.17	5	5	5	6	6	6	4	4	4	4	4	4	3	4
109	14-3-3 protein zeta/delta OS=Homo sapiens GN=YWHAZ PE=1 SV=1	1433Z_HUMAN	28	4.43	Homo Sapiens	13	9	8	15	18	13	6	8	7	12	11	13	11	11	14	0.47	0.3	0.38	0.54	0.58	0.55	0.28	0.43	0.31	0.49	0.5	0.54	0.46	0.4	0.51	11	8	6	12	15	11	4	7	5	9	9	11	8	7
110	Ig kappa chain V-I region WEA OS=Homo sapiens PE=1 SV=1	KV118_HUMAN	12	9.15	Homo Sapiens	0	0	0	0	0	0	0	0	0	0	0	0	0	0	0	0	0	0	0	0	0	0	0	0	0	0	0	0	0	0	0	0	0	0	0	0	0	0	0	0	0	0	0	0
111	Fermitin family homolog 3 OS=Homo sapiens GN=FERMT3 PE=1 SV=1	URP2_HUMAN	76	6.98	Homo Sapiens	9	6	11	9	8	7	6	4	5	19	17	15	13	18	16	0.18	0.11	0.17	0.17	0.16	0.13	0.099	0.082	0.13	0.34	0.32	0.29	0.23	0.3	0.29	8	6	9	9	8	7	5	4	5	18	16	15	13	17
112	Inter-alpha-trypsin inhibitor heavy chain H3 OS=Homo sapiens GN=ITIH3 PE=1 SV=2	ITIH3_HUMAN	100	5.49	Homo Sapiens	2	0	0	0	0	0	0	0	0	12	12	11	6	8	6	0.028	0	0	0	0	0	0	0	0	0.16	0.18	0.16	0.11	0.13	0.11	2	0	0	0	0	0	0	0	0	10	12	9	6	8
113	Myosin light polypeptide 6 OS=Homo sapiens GN=MYL6 PE=1 SV=2	MYL6_HUMAN	17	4.29	Homo Sapiens	12	11	12	11	13	14	8	9	7	16	16	15	14	14	16	0.78	0.65	0.78	0.53	0.58	0.58	0.44	0.5	0.44	0.66	0.59	0.66	0.58	0.66	0.66	10	9	10	6	7	7	7	8	6	10	8	10	9	10
114	Immunoglobulin lambda-like polypeptide 5 OS=Homo sapiens GN=IGLL5 PE=2 SV=2	IGLL5_HUMAN	23	9.05	Homo Sapiens	0	0	5	19	16	14	10	8	5	0	0	11	9	10	11	0	0	0.28	0.36	0.36	0.44	0.34	0.35	0.24	0	0	0.36	0.29	0.36	0.36	0	0	2	2	2	3	2	3	2	0	0	2	2	2
115	Filaggrin-2 OS=Homo sapiens GN=FLG2 PE=1 SV=1	FILA2_HUMAN	248	8.35	Homo Sapiens	6	8	4	5	7	10	11	4	8	21	22	11	8	10	9	0.049	0.051	0.043	0.036	0.049	0.064	0.081	0.033	0.074	0.13	0.15	0.084	0.045	0.08	0.083	6	5	4	4	6	7	8	4	7	16	18	9	6	9
116	Integrin-linked protein kiN.A.se OS=Homo sapiens GN=ILK PE=1 SV=2	ILK_HUMAN	51	8.18	Homo Sapiens	7	6	6	8	5	10	3	3	3	10	6	12	11	11	8	0.23	0.19	0.2	0.26	0.19	0.31	0.055	0.071	0.071	0.31	0.2	0.35	0.33	0.31	0.23	7	6	6	8	5	10	3	3	3	10	6	12	11	11
117	Tubulin alpha-1B chain OS=Homo sapiens GN=TUBA1B PE=1 SV=1	TBA1B_HUMAN	50	4.7	Homo Sapiens	3	7	3	7	9	10	0	0	0	13	15	14	13	13	14	0.11	0.2	0.084	0.2	0.25	0.33	0	0	0	0.38	0.45	0.42	0.37	0.35	0.47	3	6	3	7	8	10	0	0	0	12	14	13	12	12
118	Apolipoprotein M OS=Homo sapiens GN=APOM PE=1 SV=2	APOM_HUMAN	21	5.92	Homo Sapiens	0	0	0	0	0	0	0	0	0	4	0	3	4	3	4	0	0	0	0	0	0	0	0	0	0.15	0	0.15	0.16	0.12	0.16	0	0	0	0	0	0	0	0	0	3	0	3	4	3
119	Tubulin beta chain OS=Homo sapiens GN=TUBB PE=1 SV=2	TBB5_HUMAN	50	4.52	Homo Sapiens	6	5	6	7	7	10	0	0	0	17	20	13	11	12	15	0.14	0.13	0.13	0.21	0.22	0.28	0	0	0	0.49	0.56	0.39	0.34	0.39	0.35	5	4	4	6	5	7	0	0	0	12	14	10	8	8
120	Apolipoprotein C-IV OS=Homo sapiens GN=APOC4 PE=1 SV=1	APOC4_HUMAN	15	9.13	Homo Sapiens	0	0	2	0	2	2	0	0	2	6	5	6	4	4	5	0	0	0.2	0	0.18	0.18	0	0	0.1	0.28	0.28	0.28	0.28	0.18	0.28	0	0	2	0	2	2	0	0	2	4	4	4	4	3
121	HLA class I histocompatibility antigen, A-2 alpha chain OS=Homo sapiens GN=HLA-A PE=1 SV=1	1A02_HUMAN	41	7	Homo Sapiens	5	7	7	9	9	9	7	6	2	10	12	11	8	10	13	0.18	0.18	0.18	0.28	0.35	0.32	0.21	0.15	0.11	0.39	0.43	0.43	0.37	0.36	0.47	4	4	4	7	8	7	5	3	2	9	11	10	8	9
122	Cholesteryl ester transfer protein OS=Homo sapiens GN=CETP PE=1 SV=2	CETP_HUMAN	55	6.02	Homo Sapiens	5	7	6	0	4	3	5	4	4	18	11	13	7	14	10	0.087	0.087	0.069	0	0.071	0.071	0.087	0.087	0.087	0.43	0.28	0.26	0.18	0.31	0.25	5	5	3	0	3	3	4	4	4	15	10	10	7	13
123	Immunoglobulin J chain OS=Homo sapiens GN=IGJ PE=1 SV=4	IGJ_HUMAN	18	4.87	Homo Sapiens	4	4	6	6	4	5	6	5	4	4	4	5	5	3	4	0.16	0.18	0.18	0.25	0.23	0.24	0.26	0.16	0.18	0.23	0.28	0.24	0.28	0.23	0.18	3	3	4	5	3	4	5	4	3	3	4	4	4	3
124	Proteoglycan 4 OS=Homo sapiens GN=PRG4 PE=1 SV=2	PRG4_HUMAN	151	10.16	Homo Sapiens	5	5	7	2	2	2	6	5	4	7	10	5	5	3	2	0.033	0.025	0.054	0.023	0.023	0.023	0.042	0.036	0.025	0.064	0.094	0.036	0.036	0.023	0.016	5	5	7	2	2	2	6	5	4	6	9	5	5	3
125	Latent-transforming growth factor beta-binding protein 1 OS=Homo sapiens GN=LTBP1 PE=1 SV=4	LTBP1_HUMAN	187	5.85	Homo Sapiens	3	4	0	8	7	7	2	3	4	13	11	9	11	14	11	0.028	0.027	0	0.081	0.07	0.069	0.019	0.03	0.03	0.1	0.1	0.081	0.079	0.093	0.095	3	3	0	8	7	7	2	3	3	11	11	9	9	10
126	Lactotransferrin OS=Homo sapiens GN=LTF PE=1 SV=6	TRFL_HUMAN	78	8.17	Homo Sapiens	0	0	0	0	0	0	0	0	0	0	0	0	0	0	0	0	0	0	0	0	0	0	0	0	0	0	0	0	0	0	0	0	0	0	0	0	0	0	0	0	0	0	0	0
127	Pyruvate kiN.A.se PKM OS=Homo sapiens GN=PKM PE=1 SV=4	KPYM_HUMAN	58	7.94	Homo Sapiens	5	7	5	8	8	7	4	4	2	17	12	12	10	11	11	0.12	0.094	0.13	0.18	0.17	0.16	0.081	0.064	0.043	0.42	0.32	0.34	0.24	0.29	0.3	5	5	5	8	8	7	4	4	2	15	11	12	10	11
128	Transthyretin OS=Homo sapiens GN=TTR PE=1 SV=1	TTHY_HUMAN	16	5.58	Homo Sapiens	3	4	3	5	8	6	4	4	4	7	7	7	5	6	7	0.38	0.56	0.37	0.34	0.69	0.5	0.33	0.34	0.34	0.68	0.53	0.53	0.18	0.34	0.34	3	4	3	4	6	5	3	4	4	5	6	5	3	4
129	Alpha-2-antiplasmin OS=Homo sapiens GN=SERPINF2 PE=1 SV=3	A2AP_HUMAN	55	6.24	Homo Sapiens	0	0	0	0	0	0	0	2	0	7	9	6	4	6	7	0	0	0	0	0	0	0	0.065	0	0.2	0.27	0.13	0.092	0.21	0.13	0	0	0	0	0	0	0	2	0	6	8	4	3	6
130	EGF-containing fibulin-like extracellular matrix protein 1 OS=Homo sapiens GN=EFEMP1 PE=1 SV=2	FBLN3_HUMAN	55	4.7	Homo Sapiens	2	0	2	5	3	5	2	0	2	10	9	9	7	7	9	0.083	0	0.053	0.11	0.075	0.15	0.049	0	0.049	0.31	0.29	0.29	0.21	0.21	0.29	2	0	2	3	3	5	2	0	2	10	9	9	7	7
131	N-acetylmuramoyl-L-alanine amidase OS=Homo sapiens GN=PGLYRP2 PE=1 SV=1	PGRP2_HUMAN	62	7.59	Homo Sapiens	2	2	3	4	4	4	0	2	3	13	11	7	7	8	8	0.071	0.071	0.082	0.11	0.13	0.13	0	0.064	0.087	0.32	0.27	0.16	0.13	0.19	0.21	2	2	3	4	4	4	0	2	3	11	9	6	5	6
132	Ras-related protein Rap-1b OS=Homo sapiens GN=RAP1B PE=1 SV=1	RAP1B_HUMAN	21	5.39	Homo Sapiens	3	5	3	9	8	9	4	3	3	10	9	8	8	7	9	0.23	0.31	0.18	0.45	0.45	0.39	0.25	0.21	0.26	0.46	0.46	0.31	0.46	0.39	0.39	3	5	3	8	8	8	4	3	3	8	9	8	8	7
133	Afamin OS=Homo sapiens GN=AFM PE=1 SV=1	AFAM_HUMAN	69	5.7	Homo Sapiens	0	0	0	0	0	0	0	0	0	4	4	4	5	9	7	0	0	0	0	0	0	0	0	0	0.078	0.078	0.073	0.078	0.14	0.12	0	0	0	0	0	0	0	0	0	4	4	4	4	8
134	Ig heavy chain V-III region 23 OS=Homo sapiens GN=IGHV3-23 PE=1 SV=2	HV303_HUMAN	13	8.46	Homo Sapiens	2	2	2	4	4	5	2	0	3	4	7	5	5	4	7	0.26	0.19	0.26	0.26	0.35	0.35	0.19	0	0.35	0.19	0.35	0.35	0.35	0.19	0.35	2	2	2	2	3	3	2	0	3	2	3	3	3	2
135	Alpha-1-acid glycoprotein 2 OS=Homo sapiens GN=ORM2 PE=1 SV=2	A1AG2_HUMAN	24	4.76	Homo Sapiens	0	0	0	0	0	0	5	5	6	6	4	7	6	8	6	0	0	0	0	0	0	0.21	0.22	0.21	0.31	0.27	0.26	0.32	0.32	0.32	0	0	0	0	0	0	3	3	3	3	2	4	4	5
136	Plasma kallikrein OS=Homo sapiens GN=KLKB1 PE=1 SV=1	KLKB1_HUMAN	71	8.26	Homo Sapiens	2	3	3	4	4	3	3	3	3	10	8	10	8	8	10	0.042	0.056	0.063	0.08	0.08	0.063	0.063	0.063	0.063	0.19	0.16	0.15	0.13	0.13	0.18	2	3	3	4	4	3	3	3	3	10	8	8	7	7
137	Protein S100-A9 OS=Homo sapiens GN=S100A9 PE=1 SV=1	S10A9_HUMAN	13	6.07	Homo Sapiens	2	3	2	2	3	3	2	0	3	3	6	6	5	4	5	0.29	0.34	0.28	0.25	0.29	0.29	0.29	0	0.36	0.26	0.38	0.33	0.38	0.45	0.45	2	3	2	2	3	3	2	0	3	2	3	3	3	4
138	Ig kappa chain V-III region HAH OS=Homo sapiens PE=2 SV=1	KV312_HUMAN	14	8.18	Homo Sapiens	3	5	3	4	5	4	2	2	3	2	4	4	3	3	4	0.26	0.48	0.4	0.42	0.56	0.49	0.26	0.26	0.16	0.29	0.36	0.5	0.43	0.33	0.5	3	5	3	4	5	4	2	2	3	2	3	4	3	3
139	Histone H4 OS=Homo sapiens GN=HIST1H4A PE=1 SV=2	H4_HUMAN	11	11.91	Homo Sapiens	0	0	0	4	5	3	0	0	0	5	5	5	5	3	4	0	0	0	0.3	0.39	0.27	0	0	0	0.5	0.5	0.5	0.5	0.29	0.39	0	0	0	4	4	3	0	0	0	5	5	5	5	3
140	Profilin-1 OS=Homo sapiens GN=PFN1 PE=1 SV=2	PROF1_HUMAN	15	8.46	Homo Sapiens	5	6	4	6	5	5	3	3	4	7	6	6	6	7	6	0.36	0.48	0.28	0.46	0.35	0.33	0.29	0.29	0.31	0.62	0.52	0.53	0.51	0.62	0.54	5	6	4	6	5	5	3	3	4	7	6	6	6	7
141	Phospholipid transfer protein OS=Homo sapiens GN=PLTP PE=1 SV=1	PLTP_HUMAN	55	7.01	Homo Sapiens	0	0	0	0	2	2	0	0	0	6	8	4	7	4	0	0	0	0	0	0.051	0.051	0	0	0	0.2	0.21	0.099	0.19	0.099	0	0	0	0	0	2	2	0	0	0	6	7	4	6	4
142	Coagulation factor XIII A chain OS=Homo sapiens GN=F13A1 PE=1 SV=4	F13A_HUMAN	83	5.95	Homo Sapiens	2	0	4	7	9	7	3	0	0	11	15	10	12	9	13	0.038	0	0.074	0.077	0.11	0.14	0.064	0	0	0.18	0.25	0.17	0.18	0.14	0.22	2	0	4	5	7	7	3	0	0	11	14	10	11	9
143	Cathelicidin antimicrobial peptide OS=Homo sapiens GN=CAMP PE=1 SV=1	CAMP_HUMAN	19	10.03	Homo Sapiens	7	7	5	6	5	7	2	4	2	7	6	7	6	6	6	0.33	0.37	0.32	0.26	0.27	0.37	0.094	0.17	0.094	0.26	0.22	0.26	0.31	0.26	0.26	7	7	5	6	5	7	2	4	2	5	5	6	6	5
144	Heat shock cogN.A.te 71 kDa protein OS=Homo sapiens GN=HSPA8 PE=1 SV=1	HSP7C_HUMAN	71	5.16	Homo Sapiens	4	7	4	7	5	9	6	3	3	11	10	12	8	9	8	0.1	0.17	0.074	0.16	0.12	0.18	0.13	0.054	0.054	0.19	0.22	0.23	0.14	0.17	0.17	4	7	4	7	5	8	6	3	3	9	10	11	8	9
145	Cofilin-1 OS=Homo sapiens GN=CFL1 PE=1 SV=3	COF1_HUMAN	19	8.29	Homo Sapiens	4	4	3	6	5	7	4	4	2	5	8	6	5	4	3	0.26	0.26	0.22	0.53	0.45	0.51	0.25	0.22	0.15	0.47	0.51	0.5	0.4	0.3	0.23	4	4	3	6	5	6	4	4	2	5	7	6	5	4
146	Plasma protease C1 inhibitor OS=Homo sapiens GN=SERPING1 PE=1 SV=2	IC1_HUMAN	55	6.52	Homo Sapiens	0	0	0	0	0	0	0	0	0	5	3	8	2	6	3	0	0	0	0	0	0	0	0	0	0.15	0.076	0.18	0.048	0.12	0.1	0	0	0	0	0	0	0	0	0	5	3	7	2	5
147	Complement component C8 gamma chain OS=Homo sapiens GN=C8G PE=1 SV=3	CO8G_HUMAN	22	8.48	Homo Sapiens	3	4	5	5	5	8	3	2	0	7	8	6	5	6	5	0.16	0.23	0.31	0.3	0.41	0.6	0.17	0.15	0	0.45	0.45	0.45	0.39	0.4	0.49	3	3	4	5	5	8	2	2	0	6	7	6	5	6
148	Fructose-bisphosphate aldolase A OS=Homo sapiens GN=ALDOA PE=1 SV=2	ALDOA_HUMAN	39	8.2	Homo Sapiens	10	7	8	6	4	7	4	4	3	5	7	4	3	2	5	0.43	0.31	0.29	0.3	0.19	0.29	0.18	0.18	0.088	0.2	0.22	0.13	0.093	0.069	0.18	10	7	8	6	4	6	4	4	3	5	5	4	3	2
149	Angiotensinogen OS=Homo sapiens GN=AGT PE=1 SV=1	ANGT_HUMAN	53	6.27	Homo Sapiens	0	0	0	0	0	0	0	0	0	7	5	5	6	2	3	0	0	0	0	0	0	0	0	0	0.22	0.15	0.13	0.18	0.045	0.07	0	0	0	0	0	0	0	0	0	6	4	5	5	2
150	Myeloperoxidase OS=Homo sapiens GN=MPO PE=1 SV=1	PERM_HUMAN	84	9.14	Homo Sapiens	0	0	0	0	0	0	0	0	0	0	0	0	0	0	0	0	0	0	0	0	0	0	0	0	0	0	0	0	0	0	0	0	0	0	0	0	0	0	0	0	0	0	0	0
151	Complement factor H-related protein 1 OS=Homo sapiens GN=CFHR1 PE=1 SV=2	FHR1_HUMAN	38	7.42	Homo Sapiens	9	9	10	12	11	11	7	6	10	14	15	15	12	12	14	0.31	0.26	0.27	0.34	0.35	0.28	0.31	0.29	0.38	0.58	0.45	0.48	0.35	0.35	0.42	4	3	3	5	3	3	4	3	4	5	3	4	4	4
152	Sarcoplasmic/endoplasmic reticulum calcium ATPase 3 OS=Homo sapiens GN=ATP2A3 PE=1 SV=2	AT2A3_HUMAN	114	5.26	Homo Sapiens	5	10	10	11	10	10	4	0	2	16	16	13	8	12	12	0.076	0.11	0.12	0.14	0.11	0.11	0.058	0	0.026	0.21	0.18	0.15	0.1	0.14	0.15	5	9	9	10	9	8	4	0	2	16	15	13	8	11
153	Complement C4-A OS=Homo sapiens GN=C4A PE=1 SV=2	CO4A_HUMAN	193	7.08	Homo Sapiens	73	83	81	120	122	118	80	68	71	134	137	110	100	107	111	0.41	0.5	0.44	0.53	0.55	0.53	0.46	0.42	0.4	0.53	0.54	0.48	0.48	0.5	0.49	3	3	3	3	4	3	3	2	2	5	4	3	3	3
154	Coagulation factor XII OS=Homo sapiens GN=F12 PE=1 SV=3	FA12_HUMAN	68	7.76	Homo Sapiens	2	2	0	0	0	3	0	0	0	5	5	4	2	3	4	0.046	0.046	0	0	0	0.06	0	0	0	0.11	0.088	0.086	0.044	0.073	0.072	2	2	0	0	0	3	0	0	0	4	4	4	2	3
155	Ig alpha-2 chain C region OS=Homo sapiens GN=IGHA2 PE=1 SV=3	IGHA2_HUMAN	37	6.02	Homo Sapiens	0	0	0	12	8	0	0	0	0	10	12	15	12	12	13	0	0	0	0.41	0.43	0	0	0	0	0.38	0.41	0.42	0.36	0.31	0.41	0	0	0	2	2	0	0	0	0	2	3	2	2	2
156	Integrin beta-1 OS=Homo sapiens GN=ITGB1 PE=1 SV=2	ITB1_HUMAN	88	5.04	Homo Sapiens	2	5	3	6	8	9	3	3	3	9	11	8	8	7	12	0.033	0.071	0.049	0.1	0.15	0.14	0.046	0.046	0.046	0.15	0.17	0.14	0.13	0.1	0.16	2	5	3	6	8	8	3	3	3	9	11	8	8	7
157	Monocyte differentiation antigen CD14 OS=Homo sapiens GN=CD14 PE=1 SV=2	CD14_HUMAN	40	6.16	Homo Sapiens	2	3	2	0	2	4	4	3	3	6	6	5	6	6	5	0.072	0.16	0.072	0	0.13	0.18	0.14	0.096	0.096	0.26	0.17	0.17	0.2	0.2	0.15	2	3	2	0	2	4	4	3	3	6	5	5	6	6
158	Pleckstrin OS=Homo sapiens GN=PLEK PE=1 SV=3	PLEK_HUMAN	40	8.45	Homo Sapiens	4	4	3	7	8	9	3	2	3	8	4	6	6	4	6	0.16	0.16	0.15	0.31	0.32	0.31	0.15	0.15	0.23	0.3	0.19	0.18	0.18	0.11	0.18	3	3	2	6	7	6	2	2	3	5	3	3	3	2
159	Desmoglein-1 OS=Homo sapiens GN=DSG1 PE=1 SV=2	DSG1_HUMAN	114	4.66	Homo Sapiens	3	5	5	4	3	4	2	3	3	19	17	10	7	8	9	0.046	0.074	0.074	0.051	0.029	0.054	0.029	0.038	0.038	0.14	0.15	0.12	0.069	0.067	0.092	3	5	5	4	2	4	2	3	3	13	13	9	6	5
160	Junction plakoglobin OS=Homo sapiens GN=JUP PE=1 SV=3	PLAK_HUMAN	82	6.05	Homo Sapiens	2	0	0	3	0	2	2	3	0	20	21	12	7	10	9	0.04	0	0	0.04	0	0.027	0.032	0.056	0	0.34	0.34	0.21	0.1	0.17	0.14	2	0	0	3	0	2	2	3	0	17	18	12	7	10
161	Protein Z-dependent protease inhibitor OS=Homo sapiens GN=SERPIN.A.10 PE=1 SV=1	ZPI_HUMAN	51	8.58	Homo Sapiens	0	0	0	0	0	0	2	2	0	0	4	0	0	0	3	0	0	0	0	0	0	0.052	0.052	0	0	0.099	0	0	0	0.095	0	0	0	0	0	0	2	2	0	0	4	0	0	0
162	Complement factor I OS=Homo sapiens GN=CFI PE=1 SV=2	CFAI_HUMAN	66	7.53	Homo Sapiens	0	0	0	2	2	3	0	0	0	2	4	5	4	5	3	0	0	0	0.045	0.053	0.053	0	0	0	0.045	0.062	0.091	0.091	0.094	0.065	0	0	0	2	2	2	0	0	0	2	3	4	4	4
163	Platelet glycoprotein IX OS=Homo sapiens GN=GP9 PE=1 SV=3	GPIX_HUMAN	19	6.32	Homo Sapiens	3	4	4	3	3	5	4	4	4	7	7	4	6	6	6	0.23	0.31	0.23	0.23	0.14	0.23	0.23	0.31	0.23	0.27	0.27	0.27	0.27	0.27	0.27	3	4	3	3	2	3	3	4	3	4	4	4	4	4
164	Glutathione peroxidase 3 OS=Homo sapiens GN=GPX3 PE=1 SV=2	GPX3_HUMAN	26	8.29	Homo Sapiens	0	0	0	0	0	3	0	0	2	8	6	6	6	5	5	0	0	0	0	0	0.16	0	0	0.17	0.29	0.22	0.29	0.29	0.29	0.26	0	0	0	0	0	3	0	0	2	5	4	5	5	5
165	Sulfhydryl oxidase 1 OS=Homo sapiens GN=QSOX1 PE=1 SV=3	QSOX1_HUMAN	83	9.18	Homo Sapiens	0	0	0	0	0	0	0	0	0	9	10	8	6	3	8	0	0	0	0	0	0	0	0	0	0.18	0.19	0.12	0.096	0.052	0.11	0	0	0	0	0	0	0	0	0	9	9	7	5	3
166	Complement C2 OS=Homo sapiens GN=C2 PE=1 SV=2	CO2_HUMAN	83	7.43	Homo Sapiens	0	0	0	2	0	0	0	0	0	6	7	10	7	8	9	0	0	0	0.029	0	0	0	0	0	0.1	0.14	0.16	0.098	0.12	0.12	0	0	0	2	0	0	0	0	0	6	7	9	7	7
167	Keratin, type I cytoskeletal 17 OS=Homo sapiens GN=KRT17 PE=1 SV=2	K1C17_HUMAN	48	4.67	Homo Sapiens	0	0	0	11	14	16	0	4	6	32	33	23	22	26	24	0	0	0	0.21	0.26	0.31	0	0.086	0.16	0.48	0.53	0.39	0.32	0.39	0.41	0	0	0	2	4	6	0	2	2	8	9	7	6	7
168	Platelet basic protein OS=Homo sapiens GN=PPBP PE=1 SV=3	CXCL7_HUMAN	14	9.07	Homo Sapiens	3	4	5	6	6	6	3	3	4	5	6	5	5	5	5	0.27	0.27	0.3	0.32	0.4	0.4	0.27	0.2	0.3	0.3	0.38	0.3	0.3	0.3	0.3	3	3	4	4	5	5	3	2	3	3	4	3	3	3
169	Guanine nucleotide-binding protein G(i) subunit alpha-2 OS=Homo sapiens GN=GN.A.I2 PE=1 SV=3	GN.A.I2_HUMAN	40	5.2	Homo Sapiens	3	5	4	6	7	5	2	2	2	8	6	6	6	6	7	0.11	0.17	0.16	0.2	0.22	0.14	0.073	0.073	0.07	0.23	0.2	0.18	0.22	0.2	0.25	3	5	4	6	7	5	2	2	2	7	6	5	6	6
170	60 kDa heat shock protein, mitochondrial OS=Homo sapiens GN=HSPD1 PE=1 SV=2	CH60_HUMAN	61	5.55	Homo Sapiens	9	8	9	7	9	9	7	6	7	9	8	6	4	5	7	0.2	0.2	0.2	0.17	0.25	0.23	0.1	0.15	0.17	0.19	0.15	0.14	0.12	0.12	0.17	7	8	7	7	9	8	5	5	6	8	7	6	4	4
171	Leucine-rich alpha-2-glycoprotein OS=Homo sapiens GN=LRG1 PE=1 SV=2	A2GL_HUMAN	38	6.95	Homo Sapiens	0	0	0	0	0	0	0	3	2	0	0	0	0	0	0	0	0	0	0	0	0	0	0.086	0.049	0	0	0	0	0	0	0	0	0	0	0	0	0	3	2	0	0	0	0	0
172	Retinol-binding protein 4 OS=Homo sapiens GN=RBP4 PE=1 SV=3	RET4_HUMAN	23	5.85	Homo Sapiens	0	0	0	0	0	4	0	0	0	4	5	4	5	4	4	0	0	0	0	0	0.2	0	0	0	0.23	0.24	0.3	0.24	0.24	0.3	0	0	0	0	0	4	0	0	0	4	4	4	4	4
173	Peptidyl-prolyl cis-trans isomerase A OS=Homo sapiens GN=PPIA PE=1 SV=2	PPIA_HUMAN	18	7.97	Homo Sapiens	5	4	5	4	8	6	6	4	5	5	4	4	6	6	6	0.38	0.29	0.3	0.32	0.53	0.47	0.47	0.22	0.3	0.47	0.36	0.36	0.38	0.36	0.45	5	4	4	3	6	5	5	3	4	5	4	4	5	5
174	ATP synthase subunit beta, mitochondrial OS=Homo sapiens GN=ATP5B PE=1 SV=3	ATPB_HUMAN	57	5.07	Homo Sapiens	6	7	9	5	4	6	5	4	0	11	11	10	7	10	11	0.19	0.22	0.29	0.13	0.13	0.22	0.16	0.11	0	0.3	0.24	0.25	0.2	0.27	0.24	6	7	9	5	4	6	5	4	0	11	9	9	7	10
175	Complement C1q subcomponent subunit A OS=Homo sapiens GN=C1QA PE=1 SV=2	C1QA_HUMAN	26	9.45	Homo Sapiens	2	0	0	5	6	3	2	2	2	8	2	9	5	4	4	0.094	0	0	0.14	0.14	0.13	0.094	0.14	0.14	0.25	0.13	0.29	0.25	0.14	0.18	2	0	0	4	4	3	2	2	2	6	2	6	4	3
176	WD repeat-containing protein 1 OS=Homo sapiens GN=WDR1 PE=1 SV=4	WDR1_HUMAN	66	6.64	Homo Sapiens	3	2	4	3	4	3	3	4	0	5	4	7	3	4	5	0.11	0.086	0.12	0.11	0.12	0.084	0.078	0.1	0	0.14	0.14	0.18	0.068	0.12	0.12	3	2	4	3	4	3	2	3	0	4	4	7	2	4
177	Apolipoprotein F OS=Homo sapiens GN=APOF PE=1 SV=2	APOF_HUMAN	35	5.36	Homo Sapiens	0	0	0	0	0	0	0	2	0	6	5	5	4	3	4	0	0	0	0	0	0	0	0.16	0	0.22	0.18	0.18	0.18	0.15	0.077	0	0	0	0	0	0	0	2	0	4	3	3	3	2
178	Neutrophil defensin 1 OS=Homo sapiens GN=DEFA1 PE=1 SV=1	DEF1_HUMAN	10	7.04	Homo Sapiens	0	0	2	0	0	0	0	0	0	0	2	0	0	0	0	0	0	0.19	0	0	0	0	0	0	0	0.19	0	0	0	0	0	0	2	0	0	0	0	0	0	0	2	0	0	0
179	Keratin, type I cytoskeletal 13 OS=Homo sapiens GN=KRT13 PE=1 SV=4	K1C13_HUMAN	50	4.61	Homo Sapiens	0	0	0	10	10	11	0	0	0	18	20	27	21	24	24	0	0	0	0.21	0.18	0.23	0	0	0	0.27	0.3	0.48	0.3	0.39	0.34	0	0	0	5	4	5	0	0	0	6	7	13	8	12
180	Keratin, type II cuticular Hb6 OS=Homo sapiens GN=KRT86 PE=1 SV=1	KRT86_HUMAN	53	5.35	Homo Sapiens	0	0	0	0	0	0	0	0	0	0	3	4	2	3	4	0	0	0	0	0	0	0	0	0	0	0.051	0.1	0.035	0.08	0.11	0	0	0	0	0	0	0	0	0	0	3	4	2	3
181	Moesin OS=Homo sapiens GN=MSN PE=1 SV=3	MOES_HUMAN	68	6.32	Homo Sapiens	2	3	2	4	6	5	2	3	2	4	0	2	4	5	3	0.035	0.05	0.035	0.068	0.11	0.081	0.035	0.061	0.047	0.066	0	0.035	0.069	0.081	0.052	2	3	2	4	6	5	2	3	2	4	0	2	4	5
182	Clathrin heavy chain 1 OS=Homo sapiens GN=CLTC PE=1 SV=5	CLH1_HUMAN	192	5.42	Homo Sapiens	2	2	3	6	4	4	0	0	0	7	5	3	7	6	5	0.013	0.013	0.017	0.046	0.03	0.03	0	0	0	0.055	0.039	0.025	0.052	0.048	0.036	2	2	3	6	4	4	0	0	0	7	5	3	7	6
183	Keratin, type II cytoskeletal 4 OS=Homo sapiens GN=KRT4 PE=1 SV=4	K2C4_HUMAN	57	6.55	Homo Sapiens	0	0	0	0	6	6	0	0	5	15	16	28	20	17	25	0	0	0	0	0.073	0.094	0	0	0.082	0.18	0.23	0.38	0.28	0.27	0.36	0	0	0	0	2	2	0	0	2	7	9	18	12	10
184	L-lactate dehydrogeN.A.se B chain OS=Homo sapiens GN=LDHB PE=1 SV=2	LDHB_HUMAN	37	5.93	Homo Sapiens	2	5	2	6	5	6	3	3	2	2	3	2	4	4	3	0.069	0.21	0.069	0.19	0.16	0.21	0.1	0.1	0.06	0.09	0.13	0.084	0.16	0.16	0.12	2	5	2	6	5	6	3	3	2	2	3	2	4	4
185	Ig kappa chain V-I region AG OS=Homo sapiens PE=1 SV=1	KV101_HUMAN	12	5.77	Homo Sapiens	0	0	0	0	0	0	0	0	0	0	0	3	3	0	0	0	0	0	0	0	0	0	0	0	0	0	0.31	0.31	0	0	0	0	0	0	0	0	0	0	0	0	0	2	2	0
186	Zinc-alpha-2-glycoprotein OS=Homo sapiens GN=AZGP1 PE=1 SV=2	ZA2G_HUMAN	34	5.92	Homo Sapiens	0	0	0	0	2	2	0	0	0	4	2	4	3	2	3	0	0	0	0	0.074	0.074	0	0	0	0.18	0.077	0.18	0.14	0.074	0.13	0	0	0	0	2	2	0	0	0	4	2	4	3	2
187	Alpha-enolase OS=Homo sapiens GN=ENO1 PE=1 SV=2	ENOA_HUMAN	47	7.46	Homo Sapiens	5	4	4	5	8	5	0	2	0	5	4	2	3	3	2	0.19	0.16	0.13	0.15	0.26	0.16	0	0.067	0	0.12	0.13	0.069	0.097	0.094	0.053	5	4	4	5	8	5	0	2	0	4	4	2	3	3
188	Adenylyl cyclase-associated protein 1 OS=Homo sapiens GN=CAP1 PE=1 SV=5	CAP1_HUMAN	52	8.2	Homo Sapiens	3	5	4	6	5	4	3	0	0	5	8	5	6	8	5	0.093	0.14	0.088	0.12	0.12	0.12	0.082	0	0	0.14	0.23	0.14	0.12	0.2	0.15	3	5	4	5	4	4	3	0	0	5	8	5	5	7
189	Serum amyloid P-component OS=Homo sapiens GN=APCS PE=1 SV=2	SAMP_HUMAN	25	6.52	Homo Sapiens	0	0	0	0	0	0	0	0	0	0	3	2	0	3	4	0	0	0	0	0	0	0	0	0	0	0.16	0.11	0	0.13	0.16	0	0	0	0	0	0	0	0	0	0	3	2	0	3
190	Isocitrate dehydrogeN.A.se [N.A.DP], mitochondrial OS=Homo sapiens GN=IDH2 PE=1 SV=2	IDHP_HUMAN	51	8.95	Homo Sapiens	2	2	2	8	8	9	0	0	0	11	14	7	9	10	8	0.062	0.062	0.062	0.24	0.26	0.23	0	0	0	0.28	0.3	0.17	0.23	0.26	0.22	2	2	2	8	8	9	0	0	0	11	12	7	9	10
191	Collagen alpha-3(VI) chain OS=Homo sapiens GN=COL6A3 PE=1 SV=5	CO6A3_HUMAN	344	6.65	Homo Sapiens	0	0	0	0	0	0	0	0	0	0	4	0	0	0	0	0	0	0	0	0	0	0	0	0	0	0.014	0	0	0	0	0	0	0	0	0	0	0	0	0	0	4	0	0	0
192	Kallistatin OS=Homo sapiens GN=SERPIN.A.4 PE=1 SV=3	KAIN_HUMAN	49	7.85	Homo Sapiens	0	0	0	0	0	0	0	0	0	12	10	8	7	9	8	0	0	0	0	0	0	0	0	0	0.3	0.29	0.21	0.18	0.23	0.25	0	0	0	0	0	0	0	0	0	10	9	7	7	8
193	Coagulation factor XI OS=Homo sapiens GN=F11 PE=1 SV=1	FA11_HUMAN	70	8.14	Homo Sapiens	0	0	0	2	0	4	0	2	0	14	18	10	9	12	16	0	0	0	0.035	0	0.11	0	0.035	0	0.24	0.34	0.16	0.2	0.24	0.28	0	0	0	2	0	4	0	2	0	10	14	7	8	9
194	Histone H2B type 1-C/E/F/G/I OS=Homo sapiens GN=HIST1H2BC PE=1 SV=4	H2B1C_HUMAN	14	11	Homo Sapiens	3	0	3	2	4	2	2	0	0	0	2	0	0	0	0	0.21	0	0.21	0.21	0.29	0.2	0.21	0	0	0	0.17	0	0	0	0	2	0	2	2	3	2	2	0	0	0	2	0	0	0
195	C4b-binding protein beta chain OS=Homo sapiens GN=C4BPB PE=1 SV=1	C4BPB_HUMAN	28	4.8	Homo Sapiens	3	0	2	2	2	2	2	2	2	3	2	2	0	0	2	0.083	0	0.083	0.083	0.12	0.083	0.083	0.083	0.083	0.14	0.1	0.1	0	0	0.091	2	0	2	2	2	2	2	2	2	3	2	2	0	0
196	LIM and senescent cell antigen-like-containing domain protein 1 OS=Homo sapiens GN=LIMS1 PE=1 SV=4	LIMS1_HUMAN	37	8.08	Homo Sapiens	2	2	2	2	0	0	0	0	0	3	4	2	0	4	0	0.068	0.068	0.068	0.068	0	0	0	0	0	0.12	0.17	0.083	0	0.13	0	2	2	2	2	0	0	0	0	0	3	4	2	0	3
197	Solute carrier family 2, facilitated glucose transporter member 1 OS=Homo sapiens GN=SLC2A1 PE=1 SV=2	GTR1_HUMAN	54	8.92	Homo Sapiens	0	0	0	2	3	3	0	0	0	0	0	0	2	2	0	0	0	0	0.055	0.059	0.059	0	0	0	0	0	0	0.055	0.055	0	0	0	0	2	3	3	0	0	0	0	0	0	2	2
198	Platelet glycoprotein 4 OS=Homo sapiens GN=CD36 PE=1 SV=2	CD36_HUMAN	53	8.06	Homo Sapiens	0	2	0	4	3	3	0	0	0	5	6	4	3	4	5	0	0.068	0	0.11	0.081	0.081	0	0	0	0.13	0.14	0.11	0.081	0.12	0.14	0	2	0	4	3	3	0	0	0	5	5	4	3	4
199	C-reactive protein OS=Homo sapiens GN=CRP PE=1 SV=1	CRP_HUMAN	25	5.32	Homo Sapiens	0	0	0	0	0	0	0	0	0	3	0	3	3	3	3	0	0	0	0	0	0	0	0	0	0.17	0	0.11	0.11	0.13	0.17	0	0	0	0	0	0	0	0	0	3	0	3	3	3
200	Protein S100-A8 OS=Homo sapiens GN=S100A8 PE=1 SV=1	S10A8_HUMAN	11	7.07	Homo Sapiens	0	0	0	2	0	0	0	0	0	3	0	3	4	5	2	0	0	0	0.24	0	0	0	0	0	0.28	0	0.28	0.4	0.4	0.2	0	0	0	2	0	0	0	0	0	3	0	3	4	4
201	HLA class I histocompatibility antigen, B-55 alpha chain OS=Homo sapiens GN=HLA-B PE=1 SV=1	1B55_HUMAN	40	5.85	Homo Sapiens	0	4	0	4	5	4	0	0	0	7	10	10	7	8	9	0	0.13	0	0.17	0.17	0.17	0	0	0	0.23	0.36	0.36	0.25	0.28	0.28	0	2	0	2	2	2	0	0	0	2	4	4	3	3
202	Actin, alpha cardiac muscle 1 OS=Homo sapiens GN=ACTC1 PE=1 SV=1	ACTC_HUMAN	42	5.05	Homo Sapiens	39	0	42	28	25	27	29	26	0	22	19	24	0	0	0	0.29	0	0.31	0.31	0.31	0.34	0.32	0.31	0	0.36	0.36	0.44	0	0	0	2	0	2	2	2	3	2	2	0	2	2	2	0	0
203	Ig gamma-4 chain C region OS=Homo sapiens GN=IGHG4 PE=1 SV=1	IGHG4_HUMAN	36	7.41	Homo Sapiens	0	0	0	0	0	24	0	0	0	25	22	0	0	0	18	0	0	0	0	0	0.5	0	0	0	0.5	0.46	0	0	0	0.32	0	0	0	0	0	2	0	0	0	3	2	0	0	0
204	HyaluroN.A.n-binding protein 2 OS=Homo sapiens GN=HABP2 PE=1 SV=1	HABP2_HUMAN	63	6.52	Homo Sapiens	0	0	0	0	0	0	0	0	0	0	0	0	0	0	0	0	0	0	0	0	0	0	0	0	0	0	0	0	0	0	0	0	0	0	0	0	0	0	0	0	0	0	0	0
205	Solute carrier family 2, facilitated glucose transporter member 3 OS=Homo sapiens GN=SLC2A3 PE=2 SV=1	GTR3_HUMAN	54	7.24	Homo Sapiens	2	0	2	2	2	2	2	0	0	7	7	7	6	5	8	0.058	0	0.058	0.085	0.085	0.085	0.054	0	0	0.15	0.14	0.14	0.13	0.12	0.15	2	0	2	2	2	2	2	0	0	7	7	7	6	5
206	Dermcidin OS=Homo sapiens GN=DCD PE=1 SV=2	DCD_HUMAN	11	6.52	Homo Sapiens	4	3	4	3	2	2	3	3	2	6	6	5	3	4	4	0.44	0.31	0.34	0.33	0.2	0.23	0.34	0.34	0.21	0.23	0.23	0.23	0.23	0.23	0.23	4	3	4	3	2	2	3	3	2	3	3	3	2	3
207	Tubulin alpha-4A chain OS=Homo sapiens GN=TUBA4A PE=1 SV=1	TBA4A_HUMAN	50	4.69	Homo Sapiens	5	8	0	0	0	11	0	0	3	12	16	14	14	13	14	0.15	0.22	0	0	0	0.35	0	0	0.098	0.34	0.48	0.43	0.39	0.33	0.47	2	2	0	0	0	2	0	0	2	2	4	3	3	3
208	Ig heavy chain V-III region TIL OS=Homo sapiens PE=1 SV=1	HV304_HUMAN	12	9.4	Homo Sapiens	0	0	0	0	0	0	0	0	5	0	0	0	0	0	0	0	0	0	0	0	0	0	0	0.34	0	0	0	0	0	0	0	0	0	0	0	0	0	0	2	0	0	0	0	0
209	Ig lambda chain V-III region LOI OS=Homo sapiens PE=1 SV=1	LV302_HUMAN	12	4.72	Homo Sapiens	0	0	0	0	0	0	0	0	0	0	0	0	0	0	0	0	0	0	0	0	0	0	0	0	0	0	0	0	0	0	0	0	0	0	0	0	0	0	0	0	0	0	0	0
210	Alpha-amylase 1 OS=Homo sapiens GN=AMY1A PE=1 SV=2	AMY1_HUMAN	58	6.92	Homo Sapiens	3	3	0	3	6	8	4	0	4	4	5	3	0	0	2	0.067	0.067	0	0.088	0.14	0.19	0.037	0	0.037	0.11	0.15	0.049	0	0	0.049	2	2	0	3	5	6	2	0	2	4	5	2	0	0
211	Integrin alpha-6 OS=Homo sapiens GN=ITGA6 PE=1 SV=5	ITA6_HUMAN	127	6.57	Homo Sapiens	0	3	0	2	3	3	0	2	0	7	9	9	7	7	7	0	0.031	0	0.023	0.031	0.031	0	0.019	0	0.075	0.11	0.096	0.08	0.073	0.071	0	3	0	2	3	3	0	2	0	7	9	9	7	7
212	Platelet glycoprotein Ib alpha chain OS=Homo sapiens GN=GP1BA PE=1 SV=2	GP1BA_HUMAN	72	6.24	Homo Sapiens	0	0	2	2	3	3	0	0	0	4	5	7	5	7	6	0	0	0.043	0.038	0.074	0.051	0	0	0	0.06	0.084	0.11	0.089	0.13	0.1	0	0	2	2	3	3	0	0	0	4	5	7	5	7
213	Suprabasin OS=Homo sapiens GN=SBSN PE=1 SV=2	SBSN_HUMAN	61	7.01	Homo Sapiens	2	2	0	2	2	2	0	0	0	9	5	5	3	4	4	0.054	0.054	0	0.061	0.061	0.061	0	0	0	0.25	0.15	0.12	0.092	0.092	0.12	2	2	0	2	2	2	0	0	0	9	5	4	3	3
214	Erythrocyte membrane protein band 4.2 OS=Homo sapiens GN=EPB42 PE=1 SV=3	EPB42_HUMAN	77	8.17	Homo Sapiens	0	0	0	0	0	0	0	0	0	0	3	0	2	2	0	0	0	0	0	0	0	0	0	0	0	0.059	0	0.039	0.039	0	0	0	0	0	0	0	0	0	0	0	3	0	2	2
215	ATP synthase subunit alpha, mitochondrial OS=Homo sapiens GN=ATP5A1 PE=1 SV=1	ATPA_HUMAN	60	9.56	Homo Sapiens	2	2	2	6	3	3	0	0	3	10	8	8	7	11	9	0.038	0.038	0.056	0.081	0.061	0.071	0	0	0.087	0.22	0.19	0.19	0.16	0.23	0.21	2	2	2	5	3	3	0	0	3	9	7	8	6	10
216	Lysozyme C OS=Homo sapiens GN=LYZ PE=1 SV=1	LYSC_HUMAN	17	9.35	Homo Sapiens	2	0	2	2	0	3	2	2	2	4	2	2	2	2	0	0.14	0	0.14	0.14	0	0.2	0.14	0.14	0.14	0.32	0.14	0.24	0.27	0.27	0	2	0	2	2	0	3	2	2	2	3	2	2	2	2
217	Coagulation factor IX OS=Homo sapiens GN=F9 PE=1 SV=2	FA9_HUMAN	52	5.16	Homo Sapiens	0	0	0	0	0	0	0	0	0	0	0	0	0	0	0	0	0	0	0	0	0	0	0	0	0	0	0	0	0	0	0	0	0	0	0	0	0	0	0	0	0	0	0	0
218	Platelet endothelial cell adhesion molecule OS=Homo sapiens GN=PECAM1 PE=1 SV=1	PECA1_HUMAN	83	6.99	Homo Sapiens	0	2	0	6	5	5	0	0	0	8	15	11	3	6	7	0	0.024	0	0.11	0.1	0.11	0	0	0	0.15	0.26	0.2	0.061	0.13	0.13	0	2	0	5	4	5	0	0	0	8	13	11	3	6
219	Filaggrin OS=Homo sapiens GN=FLG PE=1 SV=3	FILA_HUMAN	435	9.6	Homo Sapiens	0	0	2	2	2	3	0	0	0	10	12	4	4	5	4	0	0	0.0081	0.0064	0.0064	0.0064	0	0	0	0.03	0.049	0.012	0.0064	0.016	0.016	0	0	2	2	2	2	0	0	0	7	10	3	2	4
220	Platelet glycoprotein Ib beta chain OS=Homo sapiens GN=GP1BB PE=1 SV=1	GP1BB_HUMAN	22	9.37	Homo Sapiens	2	3	5	2	3	3	4	3	4	0	2	0	0	2	2	0.083	0.14	0.19	0.11	0.11	0.11	0.18	0.14	0.15	0	0.11	0	0	0.092	0.092	2	3	5	2	3	3	4	3	4	0	2	0	0	2
221	Desmocollin-1 OS=Homo sapiens GN=DSC1 PE=1 SV=2	DSC1_HUMAN	100	5.08	Homo Sapiens	0	0	0	2	3	4	3	0	0	7	9	3	4	5	3	0	0	0	0.044	0.06	0.075	0.041	0	0	0.088	0.088	0.044	0.049	0.076	0.034	0	0	0	2	3	4	2	0	0	5	6	3	3	5
222	78 kDa glucose-regulated protein OS=Homo sapiens GN=HSPA5 PE=1 SV=2	GRP78_HUMAN	72	4.8	Homo Sapiens	3	3	3	4	4	4	4	4	3	6	5	5	5	5	2	0.066	0.066	0.06	0.083	0.083	0.08	0.083	0.083	0.058	0.12	0.098	0.098	0.098	0.1	0.041	3	3	3	3	3	3	3	3	2	5	5	5	5	4
223	Integrin alpha-M OS=Homo sapiens GN=ITGAM PE=1 SV=2	ITAM_HUMAN	127	7.24	Homo Sapiens	0	0	0	0	0	0	0	0	0	0	0	0	0	0	0	0	0	0	0	0	0	0	0	0	0	0	0	0	0	0	0	0	0	0	0	0	0	0	0	0	0	0	0	0
224	Coronin-1C OS=Homo sapiens GN=CORO1C PE=1 SV=1	COR1C_HUMAN	53	7.09	Homo Sapiens	0	2	0	0	2	0	0	0	0	5	6	3	3	4	2	0	0.051	0	0	0.044	0	0	0	0	0.14	0.14	0.078	0.051	0.068	0.046	0	2	0	0	2	0	0	0	0	5	5	3	2	3
225	Myosin regulatory light chain 12A OS=Homo sapiens GN=MYL12A PE=1 SV=2	ML12A_HUMAN	20	4.4	Homo Sapiens	2	0	0	4	5	4	0	0	0	14	12	11	9	9	10	0.12	0	0	0.27	0.28	0.27	0	0	0	0.8	0.75	0.51	0.51	0.51	0.63	2	0	0	4	5	4	0	0	0	9	8	7	7	7
226	Phosphatidylinositol-glycan-specific phospholipase D OS=Homo sapiens GN=GPLD1 PE=1 SV=3	PHLD_HUMAN	92	6.33	Homo Sapiens	0	0	0	0	0	0	0	0	0	0	0	0	0	0	0	0	0	0	0	0	0	0	0	0	0	0	0	0	0	0	0	0	0	0	0	0	0	0	0	0	0	0	0	0
227	Catalase OS=Homo sapiens GN=CAT PE=1 SV=3	CATA_HUMAN	60	7.41	Homo Sapiens	0	0	0	2	2	2	0	0	0	2	0	2	3	0	0	0	0	0	0.047	0.047	0.047	0	0	0	0.053	0	0.047	0.076	0	0	0	0	0	2	2	2	0	0	0	2	0	2	3	0
228	Endoplasmin OS=Homo sapiens GN=HSP90B1 PE=1 SV=1	ENPL_HUMAN	92	4.48	Homo Sapiens	0	2	0	2	5	3	0	0	0	2	2	3	2	4	2	0	0.049	0	0.027	0.082	0.065	0	0	0	0.035	0.041	0.042	0.031	0.066	0.025	0	2	0	2	4	3	0	0	0	2	2	3	2	4
229	Zyxin OS=Homo sapiens GN=ZYX PE=1 SV=1	ZYX_HUMAN	61	6.65	Homo Sapiens	0	0	0	2	2	4	0	0	0	2	2	3	0	2	0	0	0	0	0.052	0.052	0.072	0	0	0	0.052	0.052	0.072	0	0.052	0	0	0	0	2	2	3	0	0	0	2	2	3	0	2
230	Ig kappa chain V-IV region B17 OS=Homo sapiens PE=2 SV=1	KV404_HUMAN	15	6.51	Homo Sapiens	3	0	0	3	2	2	0	0	0	2	0	2	3	0	5	0.28	0	0	0.18	0.18	0.18	0	0	0	0.18	0	0.18	0.31	0	0.31	2	0	0	2	2	2	0	0	0	2	0	2	3	0
231	Histone H2A type 2-A OS=Homo sapiens GN=HIST2H2AA3 PE=1 SV=3	H2A2A_HUMAN	14	11.55	Homo Sapiens	0	0	0	2	0	0	0	0	0	0	0	0	0	0	0	0	0	0	0.12	0	0	0	0	0	0	0	0	0	0	0	0	0	0	2	0	0	0	0	0	0	0	0	0	0
232	Ig heavy chain V-III region TRO OS=Homo sapiens PE=1 SV=1	HV301_HUMAN	13	10	Homo Sapiens	0	0	0	2	0	0	0	0	0	0	0	0	0	0	0	0	0	0	0.24	0	0	0	0	0	0	0	0	0	0	0	0	0	0	2	0	0	0	0	0	0	0	0	0	0
233	Carboxypeptidase N catalytic chain OS=Homo sapiens GN=CPN1 PE=1 SV=1	CBPN_HUMAN	52	7.36	Homo Sapiens	0	0	0	0	0	0	0	0	0	0	0	0	0	0	0	0	0	0	0	0	0	0	0	0	0	0	0	0	0	0	0	0	0	0	0	0	0	0	0	0	0	0	0	0
234	Ig mu heavy chain disease protein OS=Homo sapiens PE=1 SV=1	MUCB_HUMAN	43	4.89	Homo Sapiens	0	0	0	48	50	51	0	0	0	0	0	0	0	0	0	0	0	0	0.58	0.58	0.59	0	0	0	0	0	0	0	0	0	0	0	0	2	2	2	0	0	0	0	0	0	0	0
235	Ig lambda chain V-I region HA OS=Homo sapiens PE=1 SV=1	LV102_HUMAN	12	9.12	Homo Sapiens	0	0	0	0	0	0	0	0	0	2	0	0	0	0	0	0	0	0	0	0	0	0	0	0	0.19	0	0	0	0	0	0	0	0	0	0	0	0	0	0	2	0	0	0	0
236	Ig heavy chain V-III region GAL OS=Homo sapiens PE=1 SV=1	HV320_HUMAN	13	8.7	Homo Sapiens	0	0	0	3	2	2	2	0	0	0	0	3	2	4	2	0	0	0	0.17	0.17	0.17	0.17	0	0	0	0	0.27	0.17	0.27	0.17	0	0	0	2	2	2	2	0	0	0	0	3	2	3
237	Apolipoprotein A-V OS=Homo sapiens GN=APOA5 PE=1 SV=1	APOA5_HUMAN	41	6.4	Homo Sapiens	2	2	0	2	0	0	0	0	0	2	2	0	0	0	2	0.036	0.098	0	0.06	0	0	0	0	0	0.055	0.057	0	0	0	0.11	2	2	0	2	0	0	0	0	0	2	2	0	0	0
238	CD9 antigen OS=Homo sapiens GN=CD9 PE=1 SV=4	CD9_HUMAN	25	7.19	Homo Sapiens	0	2	0	0	2	2	2	0	0	2	2	0	0	0	0	0	0.044	0	0	0.15	0.15	0.044	0	0	0.15	0.15	0	0	0	0	0	2	0	0	2	2	2	0	0	2	2	0	0	0
239	Ig heavy chain V-III region BUT OS=Homo sapiens PE=1 SV=1	HV306_HUMAN	12	9.48	Homo Sapiens	0	0	0	0	0	0	0	0	0	2	2	2	2	0	2	0	0	0	0	0	0	0	0	0	0.19	0.19	0.19	0.19	0	0.19	0	0	0	0	0	0	0	0	0	2	2	2	2	0
240	Beta-parvin OS=Homo sapiens GN=PARVB PE=1 SV=1	PARVB_HUMAN	42	6.72	Homo Sapiens	0	0	0	2	0	2	0	0	0	6	5	6	4	4	5	0	0	0	0.06	0	0.06	0	0	0	0.2	0.13	0.15	0.13	0.13	0.13	0	0	0	2	0	2	0	0	0	6	4	5	4	4
241	Prenylcysteine oxidase 1 OS=Homo sapiens GN=PCYOX1 PE=1 SV=3	PCYOX_HUMAN	57	6.1	Homo Sapiens	0	0	0	0	0	0	0	0	0	0	0	0	0	0	0	0	0	0	0	0	0	0	0	0	0	0	0	0	0	0	0	0	0	0	0	0	0	0	0	0	0	0	0	0
242	Vasodilator-stimulated phosphoprotein OS=Homo sapiens GN=VASP PE=1 SV=3	VASP_HUMAN	40	9.41	Homo Sapiens	0	0	0	0	0	0	0	0	0	0	0	0	0	0	0	0	0	0	0	0	0	0	0	0	0	0	0	0	0	0	0	0	0	0	0	0	0	0	0	0	0	0	0	0
243	14-3-3 protein epsilon OS=Homo sapiens GN=YWHAE PE=1 SV=1	1433E_HUMAN	29	4.36	Homo Sapiens	3	2	0	5	6	6	0	0	0	9	6	5	3	0	2	0.2	0.09	0	0.32	0.3	0.35	0	0	0	0.41	0.33	0.17	0.2	0	0.094	3	2	0	5	4	5	0	0	0	7	5	3	3	0
244	Selenoprotein P OS=Homo sapiens GN=SEPP1 PE=1 SV=3	SEPP1_HUMAN	43	7.92	Homo Sapiens	0	0	0	2	2	0	0	0	0	4	2	3	0	3	3	0	0	0	0.06	0.06	0	0	0	0	0.14	0.06	0.081	0	0.06	0.081	0	0	0	2	2	0	0	0	0	4	2	3	0	2
245	Calnexin OS=Homo sapiens GN=CANX PE=1 SV=2	CALX_HUMAN	68	4.21	Homo Sapiens	2	2	2	3	2	2	0	0	0	5	7	5	6	7	8	0.056	0.032	0.051	0.062	0.056	0.056	0	0	0	0.12	0.14	0.11	0.12	0.13	0.21	2	2	2	3	2	2	0	0	0	5	6	5	6	7
246	Calmodulin-like protein 5 OS=Homo sapiens GN=CALML5 PE=1 SV=2	CALL5_HUMAN	16	4.05	Homo Sapiens	2	2	2	2	3	2	0	3	2	2	4	3	2	3	2	0.28	0.28	0.28	0.25	0.25	0.25	0	0.34	0.28	0.26	0.42	0.25	0.25	0.25	0.25	2	2	2	2	2	2	0	3	2	2	4	3	2	3
247	Sex hormone-binding globulin OS=Homo sapiens GN=SHBG PE=1 SV=2	SHBG_HUMAN	44	6.7	Homo Sapiens	0	0	0	0	0	0	0	0	0	2	4	0	0	0	2	0	0	0	0	0	0	0	0	0	0.11	0.14	0	0	0	0.072	0	0	0	0	0	0	0	0	0	2	4	0	0	0
248	Carboxypeptidase B2 OS=Homo sapiens GN=CPB2 PE=1 SV=2	CBPB2_HUMAN	48	7.77	Homo Sapiens	0	0	0	0	0	0	0	0	0	2	2	0	0	0	0	0	0	0	0	0	0	0	0	0	0.1	0.1	0	0	0	0	0	0	0	0	0	0	0	0	0	2	2	0	0	0
249	14-3-3 protein eta OS=Homo sapiens GN=YWHAH PE=1 SV=4	1433F_HUMAN	28	4.47	Homo Sapiens	0	0	0	0	0	4	2	3	0	4	4	0	2	3	2	0	0	0	0	0	0.17	0.1	0.1	0	0.16	0.16	0	0.085	0.12	0.085	0	0	0	0	0	3	2	2	0	3	3	0	2	2
250	Carboxypeptidase N subunit 2 OS=Homo sapiens GN=CPN2 PE=1 SV=3	CPN2_HUMAN	61	5.89	Homo Sapiens	0	0	0	0	0	0	0	0	0	4	4	0	3	0	0	0	0	0	0	0	0	0	0	0	0.14	0.14	0	0.083	0	0	0	0	0	0	0	0	0	0	0	4	4	0	3	0
251	Thymosin beta-4 OS=Homo sapiens GN=TMSB4X PE=1 SV=2	TYB4_HUMAN	5	4.72	Homo Sapiens	4	3	3	2	0	2	0	2	2	2	2	2	2	2	0	0.36	0.36	0.36	0.32	0	0.32	0	0.32	0.32	0.32	0.32	0.32	0.32	0.32	0	3	3	3	2	0	2	0	2	2	2	2	2	2	2
252	JunctioN.A.l adhesion molecule A OS=Homo sapiens GN=F11R PE=1 SV=1	JAM1_HUMAN	33	8.02	Homo Sapiens	2	0	2	4	2	4	2	2	0	2	0	3	2	2	3	0.11	0	0.14	0.19	0.11	0.19	0.084	0.11	0	0.07	0	0.14	0.064	0.08	0.11	2	0	2	4	2	3	2	2	0	2	0	3	2	2
253	Triosephosphate isomerase OS=Homo sapiens GN=TPI1 PE=1 SV=3	TPIS_HUMAN	31	5.72	Homo Sapiens	0	3	0	3	3	3	0	0	2	2	3	3	3	2	2	0	0.12	0	0.12	0.13	0.13	0	0	0.077	0.087	0.13	0.087	0.087	0.087	0.077	0	3	0	3	3	3	0	0	2	2	3	2	2	2
254	Protein disulfide-isomerase A3 OS=Homo sapiens GN=PDIA3 PE=1 SV=4	PDIA3_HUMAN	57	6.28	Homo Sapiens	3	5	2	0	0	2	0	0	0	0	4	3	0	3	4	0.053	0.083	0.051	0	0	0.042	0	0	0	0	0.063	0.071	0	0.071	0.091	3	4	2	0	0	2	0	0	0	0	3	3	0	3
255	Integrin beta-2 OS=Homo sapiens GN=ITGB2 PE=1 SV=2	ITB2_HUMAN	85	6.94	Homo Sapiens	0	0	0	0	0	0	0	0	0	0	0	0	0	0	0	0	0	0	0	0	0	0	0	0	0	0	0	0	0	0	0	0	0	0	0	0	0	0	0	0	0	0	0	0
256	Actin-related protein 3 OS=Homo sapiens GN=ACTR3 PE=1 SV=3	ARP3_HUMAN	47	5.69	Homo Sapiens	0	0	0	4	3	2	0	0	0	4	3	2	3	4	3	0	0	0	0.12	0.091	0.069	0	0	0	0.13	0.11	0.05	0.084	0.14	0.074	0	0	0	4	3	2	0	0	0	4	3	2	3	4
257	Tropomyosin alpha-3 chain OS=Homo sapiens GN=TPM3 PE=1 SV=2	TPM3_HUMAN	33	4.38	Homo Sapiens	8	0	0	8	7	0	0	0	0	9	7	10	8	8	9	0.18	0	0	0.22	0.22	0	0	0	0	0.2	0.2	0.25	0.2	0.2	0.2	2	0	0	3	2	0	0	0	0	4	4	5	4	3
258	Superoxide dismutase [Mn], mitochondrial OS=Homo sapiens GN=SOD2 PE=1 SV=2	SODM_HUMAN	25	8.45	Homo Sapiens	0	0	0	4	0	2	0	0	0	5	5	3	4	5	3	0	0	0	0.18	0	0.11	0	0	0	0.21	0.32	0.14	0.17	0.25	0.15	0	0	0	3	0	2	0	0	0	4	5	3	3	4
259	Kinesin-like protein KIF20B OS=Homo sapiens GN=KIF20B PE=1 SV=3	KI20B_HUMAN	211	5.37	Homo Sapiens	0	0	0	0	0	0	0	0	0	0	0	0	0	0	0	0	0	0	0	0	0	0	0	0	0	0	0	0	0	0	0	0	0	0	0	0	0	0	0	0	0	0	0	0
260	Heat shock protein HSP 90-alpha OS=Homo sapiens GN=HSP90AA1 PE=1 SV=5	HS90A_HUMAN	85	4.66	Homo Sapiens	0	0	0	2	0	3	0	0	0	3	5	2	2	0	3	0	0	0	0.041	0	0.067	0	0	0	0.055	0.077	0.037	0.037	0	0.055	0	0	0	2	0	3	0	0	0	3	5	2	2	0
261	Guanine nucleotide-binding protein G(I)/G(S)/G(T) subunit beta-1 OS=Homo sapiens GN=GNB1 PE=1 SV=3	GBB1_HUMAN	37	5.85	Homo Sapiens	0	0	0	2	4	4	0	0	0	2	2	0	0	4	0	0	0	0	0.082	0.15	0.15	0	0	0	0.062	0.068	0	0	0.13	0	0	0	0	2	4	4	0	0	0	2	2	0	0	4
262	Transgelin-2 OS=Homo sapiens GN=TAGLN2 PE=1 SV=3	TAGL2_HUMAN	22	8.45	Homo Sapiens	0	0	0	0	2	2	0	0	0	2	2	3	0	5	4	0	0	0	0	0.12	0.12	0	0	0	0.12	0.12	0.17	0	0.3	0.26	0	0	0	0	2	2	0	0	0	2	2	3	0	5
263	P-selectin OS=Homo sapiens GN=SELP PE=1 SV=3	LYAM3_HUMAN	91	6.57	Homo Sapiens	0	2	2	3	3	2	0	0	0	4	6	7	5	4	6	0	0.029	0.019	0.029	0.036	0.027	0	0	0	0.086	0.094	0.06	0.052	0.052	0.053	0	2	2	2	3	2	0	0	0	4	6	4	4	4
264	Adipocyte plasma membrane-associated protein OS=Homo sapiens GN=APMAP PE=1 SV=2	APMAP_HUMAN	46	6.02	Homo Sapiens	0	0	0	0	0	0	0	0	0	0	0	0	0	0	0	0	0	0	0	0	0	0	0	0	0	0	0	0	0	0	0	0	0	0	0	0	0	0	0	0	0	0	0	0
265	L-lactate dehydrogeN.A.se A chain OS=Homo sapiens GN=LDHA PE=1 SV=2	LDHA_HUMAN	37	8.45	Homo Sapiens	0	3	0	0	3	3	0	0	0	0	0	0	0	0	0	0	0.093	0	0	0.093	0.093	0	0	0	0	0	0	0	0	0	0	2	0	0	2	2	0	0	0	0	0	0	0	0
266	Serum deprivation-response protein OS=Homo sapiens GN=SDPR PE=1 SV=3	SDPR_HUMAN	47	4.88	Homo Sapiens	0	0	0	0	0	0	0	0	0	3	4	2	2	5	5	0	0	0	0	0	0	0	0	0	0.099	0.12	0.059	0.059	0.15	0.12	0	0	0	0	0	0	0	0	0	3	4	2	2	5
267	Prostaglandin G/H synthase 1 OS=Homo sapiens GN=PTGS1 PE=1 SV=2	PGH1_HUMAN	69	7.25	Homo Sapiens	2	4	2	2	2	0	0	3	0	3	5	5	2	3	5	0.075	0.11	0.075	0.07	0.07	0	0	0.048	0	0.088	0.1	0.093	0.057	0.098	0.11	2	4	2	2	2	0	0	2	0	3	4	4	2	3
268	Peroxiredoxin-2 OS=Homo sapiens GN=PRDX2 PE=1 SV=5	PRDX2_HUMAN	22	5.76	Homo Sapiens	2	0	0	0	0	0	0	0	0	2	0	0	2	0	0	0.15	0	0	0	0	0	0	0	0	0.11	0	0	0.091	0	0	2	0	0	0	0	0	0	0	0	2	0	0	2	0
269	Fetuin-B OS=Homo sapiens GN=FETUB PE=1 SV=2	FETUB_HUMAN	42	6.83	Homo Sapiens	0	0	0	0	0	0	0	0	0	3	4	3	3	4	3	0	0	0	0	0	0	0	0	0	0.16	0.18	0.1	0.1	0.073	0.1	0	0	0	0	0	0	0	0	0	3	4	3	3	2
270	Transforming protein RhoA OS=Homo sapiens GN=RHOA PE=1 SV=1	RHOA_HUMAN	22	5.89	Homo Sapiens	2	0	2	0	0	0	2	0	0	3	2	0	0	0	0	0.14	0	0.14	0	0	0	0.14	0	0	0.2	0.12	0	0	0	0	2	0	2	0	0	0	2	0	0	3	2	0	0	0
271	Thromboxane-A synthase OS=Homo sapiens GN=TBXAS1 PE=1 SV=3	THAS_HUMAN	61	7.68	Homo Sapiens	0	2	0	5	4	4	0	0	0	8	5	5	5	5	6	0	0.043	0	0.11	0.086	0.084	0	0	0	0.19	0.12	0.12	0.11	0.12	0.12	0	2	0	5	4	4	0	0	0	8	5	5	5	5
272	F-actin-capping protein subunit beta OS=Homo sapiens GN=CAPZB PE=1 SV=4	CAPZB_HUMAN	31	5.23	Homo Sapiens	0	0	0	0	0	2	0	0	0	6	5	7	5	3	5	0	0	0	0	0	0.12	0	0	0	0.31	0.25	0.36	0.26	0.16	0.23	0	0	0	0	0	2	0	0	0	6	4	7	5	3
273	Keratin, type II cytoskeletal 6A OS=Homo sapiens GN=KRT6A PE=1 SV=3	K2C6A_HUMAN	60	8.16	Homo Sapiens	0	0	0	0	0	0	0	0	0	47	46	39	41	41	40	0	0	0	0	0	0	0	0	0	0.55	0.53	0.52	0.53	0.57	0.58	0	0	0	0	0	0	0	0	0	4	4	3	2	2
274	Ig lambda chain V-III region SH OS=Homo sapiens PE=1 SV=1	LV301_HUMAN	11	6.5	Homo Sapiens	0	0	0	0	0	0	0	0	0	0	0	0	0	0	0	0	0	0	0	0	0	0	0	0	0	0	0	0	0	0	0	0	0	0	0	0	0	0	0	0	0	0	0	0
275	Ig lambda chain V-IV region Hil OS=Homo sapiens PE=1 SV=1	LV403_HUMAN	12	6.45	Homo Sapiens	0	0	0	0	0	0	0	0	0	0	2	0	0	0	2	0	0	0	0	0	0	0	0	0	0	0.28	0	0	0	0.28	0	0	0	0	0	0	0	0	0	0	2	0	0	0
276	Pigment epithelium-derived factor OS=Homo sapiens GN=SERPINF1 PE=1 SV=4	PEDF_HUMAN	46	6.33	Homo Sapiens	0	0	0	0	0	0	0	0	0	2	2	0	0	0	0	0	0	0	0	0	0	0	0	0	0.05	0.05	0	0	0	0	0	0	0	0	0	0	0	0	0	2	2	0	0	0
277	Ig kappa chain V-II region RPMI 6410 OS=Homo sapiens PE=4 SV=1	KV206_HUMAN	15	9.53	Homo Sapiens	0	0	0	0	0	0	0	0	0	0	0	0	0	0	0	0	0	0	0	0	0	0	0	0	0	0	0	0	0	0	0	0	0	0	0	0	0	0	0	0	0	0	0	0
278	Protein S100-A7 OS=Homo sapiens GN=S100A7 PE=1 SV=4	S10A7_HUMAN	11	6.78	Homo Sapiens	0	0	0	3	3	0	0	0	0	3	2	3	0	4	3	0	0	0	0.3	0.3	0	0	0	0	0.31	0.2	0.22	0	0.42	0.42	0	0	0	2	2	0	0	0	0	3	2	2	0	4
279	HLA class I histocompatibility antigen, A-24 alpha chain OS=Homo sapiens GN=HLA-A PE=1 SV=2	1A24_HUMAN	41	6.29	Homo Sapiens	0	0	6	0	0	0	0	0	0	8	10	8	0	0	10	0	0	0.18	0	0	0	0	0	0	0.36	0.41	0.36	0	0	0.35	0	0	2	0	0	0	0	0	0	3	3	3	0	0
280	Keratinocyte proline-rich protein OS=Homo sapiens GN=KPRP PE=1 SV=1	KPRP_HUMAN	64	8.29	Homo Sapiens	0	0	0	0	2	0	0	0	0	4	6	0	0	2	0	0	0	0	0	0.021	0	0	0	0	0.098	0.098	0	0	0.062	0	0	0	0	0	2	0	0	0	0	4	4	0	0	2
281	PDZ and LIM domain protein 1 OS=Homo sapiens GN=PDLIM1 PE=1 SV=4	PDLI1_HUMAN	36	7.03	Homo Sapiens	0	0	0	0	0	0	0	0	0	2	0	2	2	2	0	0	0	0	0	0	0	0	0	0	0.067	0	0.067	0.067	0.067	0	0	0	0	0	0	0	0	0	0	2	0	2	2	2
282	Phosphoglycerate kiN.A.se 1 OS=Homo sapiens GN=PGK1 PE=1 SV=3	PGK1_HUMAN	45	8.27	Homo Sapiens	0	0	0	0	2	0	0	0	0	0	0	0	0	0	0	0	0	0	0	0.077	0	0	0	0	0	0	0	0	0	0	0	0	0	0	2	0	0	0	0	0	0	0	0	0
283	Beta-Ala-His dipeptidase OS=Homo sapiens GN=CNDP1 PE=1 SV=4	CNDP1_HUMAN	57	4.95	Homo Sapiens	0	0	0	0	0	0	0	0	0	0	0	0	0	0	2	0	0	0	0	0	0	0	0	0	0	0	0	0	0	0.043	0	0	0	0	0	0	0	0	0	0	0	0	0	0
284	Actin-related protein 2/3 complex subunit 1B OS=Homo sapiens GN=ARPC1B PE=1 SV=3	ARC1B_HUMAN	41	8.44	Homo Sapiens	2	2	2	4	2	0	0	0	0	2	4	3	3	2	2	0.086	0.086	0.086	0.16	0.099	0	0	0	0	0.097	0.18	0.12	0.12	0.097	0.075	2	2	2	4	2	0	0	0	0	2	4	3	3	2
285	Transferrin receptor protein 1 OS=Homo sapiens GN=TFRC PE=1 SV=2	TFR1_HUMAN	85	6.58	Homo Sapiens	0	0	0	0	0	0	0	0	0	0	0	0	0	0	0	0	0	0	0	0	0	0	0	0	0	0	0	0	0	0	0	0	0	0	0	0	0	0	0	0	0	0	0	0
286	Caldesmon OS=Homo sapiens GN=CALD1 PE=1 SV=3	CALD1_HUMAN	93	5.35	Homo Sapiens	0	0	0	0	0	0	0	0	0	0	0	0	0	0	0	0	0	0	0	0	0	0	0	0	0	0	0	0	0	0	0	0	0	0	0	0	0	0	0	0	0	0	0	0
287	Secreted phosphoprotein 24 OS=Homo sapiens GN=SPP2 PE=1 SV=1	SPP24_HUMAN	24	8.46	Homo Sapiens	0	0	0	0	0	0	0	0	0	0	0	0	2	0	0	0	0	0	0	0	0	0	0	0	0	0	0	0.12	0	0	0	0	0	0	0	0	0	0	0	0	0	0	2	0
288	Cell division control protein 42 homolog OS=Homo sapiens GN=CDC42 PE=1 SV=2	CDC42_HUMAN	21	6.51	Homo Sapiens	0	0	0	0	0	2	0	0	0	2	2	0	0	0	0	0	0	0	0	0	0.16	0	0	0	0.12	0.12	0	0	0	0	0	0	0	0	0	2	0	0	0	2	2	0	0	0
289	Chloride intracellular channel protein 1 OS=Homo sapiens GN=CLIC1 PE=1 SV=4	CLIC1_HUMAN	27	4.82	Homo Sapiens	0	2	0	2	3	2	0	0	0	3	3	2	4	0	0	0	0.087	0	0.087	0.12	0.087	0	0	0	0.16	0.17	0.087	0.17	0	0	0	2	0	2	3	2	0	0	0	3	3	2	4	0
290	Platelet glycoprotein V OS=Homo sapiens GN=GP5 PE=1 SV=1	GPV_HUMAN	61	10.24	Homo Sapiens	0	0	0	2	0	2	0	0	0	0	2	2	0	0	0	0	0	0	0.038	0	0.038	0	0	0	0	0.045	0.038	0	0	0	0	0	0	2	0	2	0	0	0	0	2	2	0	0
291	Ficolin-2 OS=Homo sapiens GN=FCN2 PE=1 SV=2	FCN2_HUMAN	34	6.77	Homo Sapiens	0	0	0	0	0	0	0	0	0	2	2	4	2	3	3	0	0	0	0	0	0	0	0	0	0.12	0.11	0.18	0.11	0.15	0.15	0	0	0	0	0	0	0	0	0	2	2	4	2	3
292	Galectin-3-binding protein OS=Homo sapiens GN=LGALS3BP PE=1 SV=1	LG3BP_HUMAN	65	4.9	Homo Sapiens	0	0	0	0	0	0	0	0	0	0	0	0	0	0	0	0	0	0	0	0	0	0	0	0	0	0	0	0	0	0	0	0	0	0	0	0	0	0	0	0	0	0	0	0
293	Collectin-11 OS=Homo sapiens GN=COLEC11 PE=1 SV=1	COL11_HUMAN	29	5.06	Homo Sapiens	0	0	0	0	0	0	0	0	0	0	0	0	0	0	0	0	0	0	0	0	0	0	0	0	0	0	0	0	0	0	0	0	0	0	0	0	0	0	0	0	0	0	0	0
294	14-3-3 protein beta/alpha OS=Homo sapiens GN=YWHAB PE=1 SV=3	1433B_HUMAN	28	4.47	Homo Sapiens	0	0	0	4	6	0	0	0	0	0	5	4	0	3	0	0	0	0	0.26	0.36	0	0	0	0	0	0.17	0.17	0	0.13	0	0	0	0	3	4	0	0	0	0	0	2	2	0	2
295	Tyrosine-protein kiN.A.se Lyn OS=Homo sapiens GN=LYN PE=1 SV=3	LYN_HUMAN	59	7.13	Homo Sapiens	0	0	0	2	0	2	0	0	0	2	3	2	2	2	3	0	0	0	0.035	0	0.043	0	0	0	0.035	0.051	0.035	0.047	0.035	0.07	0	0	0	2	0	2	0	0	0	2	3	2	2	2
296	Annexin A2 OS=Homo sapiens GN=ANXA2 PE=1 SV=2	ANXA2_HUMAN	39	7.91	Homo Sapiens	0	0	0	3	3	2	0	0	0	2	3	4	0	2	0	0	0	0	0.11	0.11	0.062	0	0	0	0.062	0.094	0.094	0	0.062	0	0	0	0	3	3	2	0	0	0	2	3	3	0	2
297	BPI fold-containing family B member 1 OS=Homo sapiens GN=BPIFB1 PE=1 SV=1	BPIB1_HUMAN	52	7.26	Homo Sapiens	0	0	0	0	0	0	0	0	0	4	0	4	0	3	5	0	0	0	0	0	0	0	0	0	0.14	0	0.11	0	0.095	0.11	0	0	0	0	0	0	0	0	0	4	0	4	0	3
298	EMILIN-1 OS=Homo sapiens GN=EMILIN1 PE=1 SV=2	EMIL1_HUMAN	107	4.81	Homo Sapiens	4	0	3	2	2	4	2	0	0	4	2	7	3	4	3	0.041	0	0.024	0.031	0.023	0.07	0.031	0	0	0.075	0.028	0.11	0.038	0.047	0.043	4	0	2	2	2	4	2	0	0	4	2	7	2	3
299	Keratin, type I cuticular Ha2 OS=Homo sapiens GN=KRT32 PE=2 SV=3	K1H2_HUMAN	50	4.49	Homo Sapiens	0	0	0	0	0	0	0	0	0	4	4	0	0	4	4	0	0	0	0	0	0	0	0	0	0.071	0.071	0	0	0.071	0.071	0	0	0	0	0	0	0	0	0	2	2	0	0	2
300	Corticosteroid-binding globulin OS=Homo sapiens GN=SERPIN.A.6 PE=1 SV=1	CBG_HUMAN	45	5.95	Homo Sapiens	0	0	0	0	0	0	0	0	0	3	4	2	3	2	3	0	0	0	0	0	0	0	0	0	0.1	0.14	0.057	0.077	0.044	0.096	0	0	0	0	0	0	0	0	0	3	4	2	3	2
301	Keratin, type II cytoskeletal 73 OS=Homo sapiens GN=KRT73 PE=1 SV=1	K2C73_HUMAN	59	7.26	Homo Sapiens	0	0	0	0	7	0	3	5	5	0	0	0	0	0	0	0	0	0	0	0.085	0	0.048	0.063	0.063	0	0	0	0	0	0	0	0	0	0	2	0	2	2	2	0	0	0	0	0
302	Complement factor H-related protein 2 OS=Homo sapiens GN=CFHR2 PE=1 SV=1	FHR2_HUMAN	31	6.34	Homo Sapiens	0	0	0	0	0	0	0	4	0	0	7	7	6	6	9	0	0	0	0	0	0	0	0.26	0	0	0.26	0.26	0.26	0.26	0.39	0	0	0	0	0	0	0	2	0	0	2	2	2	2
303	Keratin, type II cytoskeletal 6B OS=Homo sapiens GN=KRT6B PE=1 SV=5	K2C6B_HUMAN	60	8.16	Homo Sapiens	0	0	0	0	0	0	13	0	17	0	45	0	43	43	0	0	0	0	0	0	0	0.25	0	0.29	0	0.52	0	0.56	0.58	0	0	0	0	0	0	0	2	0	2	0	2	0	2	2
304	CD59 glycoprotein OS=Homo sapiens GN=CD59 PE=1 SV=1	CD59_HUMAN	14	6.47	Homo Sapiens	0	0	0	0	0	0	0	0	0	0	0	2	0	0	0	0	0	0	0	0	0	0	0	0	0	0	0.19	0	0	0	0	0	0	0	0	0	0	0	0	0	0	2	0	0
305	Retinol dehydrogeN.A.se 11 OS=Homo sapiens GN=RDH11 PE=1 SV=2	RDH11_HUMAN	35	9.06	Homo Sapiens	0	0	0	3	3	4	0	0	0	4	2	3	5	5	3	0	0	0	0.12	0.12	0.16	0	0	0	0.2	0.085	0.14	0.2	0.21	0.12	0	0	0	3	3	4	0	0	0	4	2	3	5	5
306	Endonuclease domain-containing 1 protein OS=Homo sapiens GN=ENDOD1 PE=1 SV=2	ENDD1_HUMAN	55	5.38	Homo Sapiens	2	2	0	0	0	0	0	0	0	3	6	4	4	3	4	0.062	0.062	0	0	0	0	0	0	0	0.078	0.11	0.098	0.086	0.078	0.098	2	2	0	0	0	0	0	0	0	3	5	4	4	3
307	Azurocidin OS=Homo sapiens GN=AZU1 PE=1 SV=3	CAP7_HUMAN	27	9.65	Homo Sapiens	0	0	0	0	0	0	0	0	0	0	0	0	0	0	0	0	0	0	0	0	0	0	0	0	0	0	0	0	0	0	0	0	0	0	0	0	0	0	0	0	0	0	0	0
308	Integrin alpha-2 OS=Homo sapiens GN=ITGA2 PE=1 SV=1	ITA2_HUMAN	129	4.95	Homo Sapiens	0	0	0	0	0	2	0	0	0	5	4	5	5	5	8	0	0	0	0	0	0.025	0	0	0	0.052	0.042	0.052	0.057	0.05	0.069	0	0	0	0	0	2	0	0	0	5	4	5	5	5
309	Keratin, type II cuticular Hb2 OS=Homo sapiens GN=KRT82 PE=3 SV=3	KRT82_HUMAN	57	6.72	Homo Sapiens	0	0	0	0	0	0	0	0	0	0	0	0	0	0	0	0	0	0	0	0	0	0	0	0	0	0	0	0	0	0	0	0	0	0	0	0	0	0	0	0	0	0	0	0
310	Keratin, type II cuticular Hb5 OS=Homo sapiens GN=KRT85 PE=1 SV=1	KRT85_HUMAN	56	6.49	Homo Sapiens	0	0	0	0	0	0	0	0	0	0	0	0	0	0	0	0	0	0	0	0	0	0	0	0	0	0	0	0	0	0	0	0	0	0	0	0	0	0	0	0	0	0	0	0
311	Hemoglobin subunit delta OS=Homo sapiens GN=HBD PE=1 SV=2	HBD_HUMAN	16	8.26	Homo Sapiens	0	0	0	0	0	0	0	0	0	0	0	0	0	0	0	0	0	0	0	0	0	0	0	0	0	0	0	0	0	0	0	0	0	0	0	0	0	0	0	0	0	0	0	0
312	Coronin-1A OS=Homo sapiens GN=CORO1A PE=1 SV=4	COR1A_HUMAN	51	6.67	Homo Sapiens	0	0	0	0	0	0	0	0	0	3	0	2	3	2	3	0	0	0	0	0	0	0	0	0	0.089	0	0.054	0.089	0.054	0.089	0	0	0	0	0	0	0	0	0	3	0	2	3	2
313	Ras-related protein Rab-10 OS=Homo sapiens GN=RAB10 PE=1 SV=1	RAB10_HUMAN	23	8.61	Homo Sapiens	0	0	0	3	4	3	0	0	0	0	0	0	0	0	0	0	0	0	0.17	0.17	0.17	0	0	0	0	0	0	0	0	0	0	0	0	2	2	2	0	0	0	0	0	0	0	0
314	Ig lambda chain V region 4A OS=Homo sapiens PE=4 SV=1	LV001_HUMAN	12	7.12	Homo Sapiens	0	0	0	0	0	0	0	0	0	2	0	0	0	0	0	0	0	0	0	0	0	0	0	0	0.14	0	0	0	0	0	0	0	0	0	0	0	0	0	0	2	0	0	0	0
315	Transforming growth factor beta-1 OS=Homo sapiens GN=TGFB1 PE=1 SV=2	TGFB1_HUMAN	44	8.63	Homo Sapiens	0	0	0	0	0	2	2	0	0	3	4	3	3	4	5	0	0	0	0	0	0.095	0.059	0	0	0.11	0.1	0.11	0.11	0.11	0.14	0	0	0	0	0	2	2	0	0	3	3	3	3	3
316	Myosin regulatory light polypeptide 9 OS=Homo sapiens GN=MYL9 PE=1 SV=4	MYL9_HUMAN	20	4.54	Homo Sapiens	0	0	2	3	5	5	2	0	0	12	10	12	0	10	10	0	0	0.18	0.24	0.36	0.36	0.18	0	0	0.56	0.51	0.56	0	0.62	0.56	0	0	2	2	3	3	2	0	0	2	2	2	0	3
317	HLA class I histocompatibility antigen, B-35 alpha chain OS=Homo sapiens GN=HLA-B PE=1 SV=1	1B35_HUMAN	40	6.43	Homo Sapiens	0	0	0	0	0	0	0	0	0	0	0	0	0	0	0	0	0	0	0	0	0	0	0	0	0	0	0	0	0	0	0	0	0	0	0	0	0	0	0	0	0	0	0	0
318	Ig heavy chain V-I region Mot OS=Homo sapiens PE=1 SV=1	HV107_HUMAN	14	6.23	Homo Sapiens	0	0	0	0	0	0	0	0	0	0	0	0	0	0	0	0	0	0	0	0	0	0	0	0	0	0	0	0	0	0	0	0	0	0	0	0	0	0	0	0	0	0	0	0
319	Complement factor H-related protein 4 OS=Homo sapiens GN=CFHR4 PE=1 SV=3	FHR4_HUMAN	65	4.58	Homo Sapiens	0	0	0	0	0	0	0	0	0	0	0	0	0	0	0	0	0	0	0	0	0	0	0	0	0	0	0	0	0	0	0	0	0	0	0	0	0	0	0	0	0	0	0	0
320	Complement factor H-related protein 3 OS=Homo sapiens GN=CFHR3 PE=1 SV=2	FHR3_HUMAN	37	7.59	Homo Sapiens	0	0	0	0	0	0	0	0	0	0	0	0	0	0	0	0	0	0	0	0	0	0	0	0	0	0	0	0	0	0	0	0	0	0	0	0	0	0	0	0	0	0	0	0
321	ManN.A.n-binding lectin serine protease 1 OS=Homo sapiens GN=MASP1 PE=1 SV=3	MASP1_HUMAN	79	5.18	Homo Sapiens	0	0	0	0	0	0	0	0	0	0	0	2	0	2	3	0	0	0	0	0	0	0	0	0	0	0	0.033	0	0.039	0.033	0	0	0	0	0	0	0	0	0	0	0	2	0	2
322	ADP-ribosylation factor 1 OS=Homo sapiens GN=ARF1 PE=1 SV=2	ARF1_HUMAN	21	6.8	Homo Sapiens	0	0	0	0	0	0	0	0	0	0	3	0	0	0	2	0	0	0	0	0	0	0	0	0	0	0.25	0	0	0	0.14	0	0	0	0	0	0	0	0	0	0	3	0	0	0
323	ADP/ATP translocase 2 OS=Homo sapiens GN=SLC25A5 PE=1 SV=7	ADT2_HUMAN	33	10.18	Homo Sapiens	0	0	0	2	2	3	0	0	0	2	4	4	2	3	4	0	0	0	0.06	0.06	0.11	0	0	0	0.084	0.15	0.15	0.074	0.1	0.15	0	0	0	2	2	3	0	0	0	2	4	4	2	3
324	Proto-oncogene tyrosine-protein kiN.A.se Src OS=Homo sapiens GN=SRC PE=1 SV=3	SRC_HUMAN	60	7.47	Homo Sapiens	2	0	0	0	0	0	0	0	0	3	3	0	2	0	2	0.043	0	0	0	0	0	0	0	0	0.063	0.06	0	0.039	0	0.045	2	0	0	0	0	0	0	0	0	3	3	0	2	0
325	Insulin-like growth factor-binding protein complex acid labile subunit OS=Homo sapiens GN=IGFALS PE=1 SV=1	ALS_HUMAN	66	6.78	Homo Sapiens	0	0	0	0	0	0	0	0	0	0	0	2	0	0	2	0	0	0	0	0	0	0	0	0	0	0	0.041	0	0	0.041	0	0	0	0	0	0	0	0	0	0	0	2	0	0
326	Prolactin-inducible protein OS=Homo sapiens GN=PIP PE=1 SV=1	PIP_HUMAN	17	8.18	Homo Sapiens	0	0	0	2	2	2	0	0	0	3	3	2	3	0	2	0	0	0	0.14	0.18	0.18	0	0	0	0.26	0.26	0.19	0.27	0	0.19	0	0	0	2	2	2	0	0	0	3	3	2	3	0
327	Phosphatidylcholine-sterol acyltransferase OS=Homo sapiens GN=LCAT PE=1 SV=1	LCAT_HUMAN	50	6.04	Homo Sapiens	0	0	0	0	0	0	0	0	0	2	4	2	0	2	2	0	0	0	0	0	0	0	0	0	0.05	0.11	0.089	0	0.05	0.05	0	0	0	0	0	0	0	0	0	2	4	2	0	2
328	Sarcoplasmic/endoplasmic reticulum calcium ATPase 2 OS=Homo sapiens GN=ATP2A2 PE=1 SV=1	AT2A2_HUMAN	115	4.99	Homo Sapiens	3	0	4	4	3	0	0	0	0	9	6	7	6	8	5	0.034	0	0.054	0.035	0.038	0	0	0	0	0.12	0.082	0.085	0.073	0.096	0.066	2	0	2	2	2	0	0	0	0	5	3	3	2	4
329	N.A.DH-cytochrome b5 reductase 3 OS=Homo sapiens GN=CYB5R3 PE=1 SV=3	NB5R3_HUMAN	34	7.68	Homo Sapiens	0	0	0	0	2	0	0	0	0	2	4	5	3	5	3	0	0	0	0	0.18	0	0	0	0	0.14	0.24	0.25	0.14	0.22	0.13	0	0	0	0	2	0	0	0	0	2	4	5	3	5
330	Sushi, von Willebrand factor type A, EGF and pentraxin domain-containing protein 1 OS=Homo sapiens GN=SVEP1 PE=1 SV=3	SVEP1_HUMAN	390	5.2	Homo Sapiens	0	0	0	0	3	0	0	0	0	0	0	0	0	0	0	0	0	0	0	0.011	0	0	0	0	0	0	0	0	0	0	0	0	0	0	3	0	0	0	0	0	0	0	0	0
331	Phosphatidylinositide phosphatase SAC1 OS=Homo sapiens GN=SACM1L PE=1 SV=2	SAC1_HUMAN	67	7.13	Homo Sapiens	0	0	0	0	2	0	0	0	0	7	5	3	5	5	3	0	0	0	0	0.036	0	0	0	0	0.1	0.085	0.051	0.085	0.085	0.051	0	0	0	0	2	0	0	0	0	6	5	3	5	5
332	EH domain-containing protein 3 OS=Homo sapiens GN=EHD3 PE=1 SV=2	EHD3_HUMAN	61	6.53	Homo Sapiens	2	2	0	0	0	0	0	0	0	4	4	0	0	0	2	0.054	0.056	0	0	0	0	0	0	0	0.1	0.1	0	0	0	0.043	2	2	0	0	0	0	0	0	0	4	4	0	0	0
333	Carnitine O-palmitoyltransferase 1, liver isoform OS=Homo sapiens GN=CPT1A PE=1 SV=2	CPT1A_HUMAN	88	8.84	Homo Sapiens	2	2	3	0	3	3	0	0	0	2	2	0	2	0	2	0.036	0.036	0.036	0	0.05	0.032	0	0	0	0.032	0.032	0	0.032	0	0.032	2	2	2	0	3	2	0	0	0	2	2	0	2	0
334	Elongation factor 1-alpha 1 OS=Homo sapiens GN=EEF1A1 PE=1 SV=1	EF1A1_HUMAN	50	9.5	Homo Sapiens	0	0	0	0	3	2	0	0	0	0	0	0	0	2	0	0	0	0	0	0.065	0.045	0	0	0	0	0	0	0	0.045	0	0	0	0	0	3	2	0	0	0	0	0	0	0	2
335	Actin-related protein 2 OS=Homo sapiens GN=ACTR2 PE=1 SV=1	ARP2_HUMAN	45	6.72	Homo Sapiens	0	0	0	0	0	0	0	0	0	4	3	4	3	2	4	0	0	0	0	0	0	0	0	0	0.12	0.089	0.12	0.091	0.058	0.12	0	0	0	0	0	0	0	0	0	4	3	4	3	2
336	Keratin, type II cytoskeletal 80 OS=Homo sapiens GN=KRT80 PE=1 SV=2	K2C80_HUMAN	51	5.36	Homo Sapiens	0	0	0	0	0	0	0	0	0	7	7	5	5	5	4	0	0	0	0	0	0	0	0	0	0.1	0.14	0.073	0.073	0.077	0.073	0	0	0	0	0	0	0	0	0	3	5	2	2	2
337	Annexin A1 OS=Homo sapiens GN=ANXA1 PE=1 SV=2	ANXA1_HUMAN	39	7.04	Homo Sapiens	0	0	0	0	0	0	0	0	0	0	0	0	0	3	3	0	0	0	0	0	0	0	0	0	0	0	0	0	0.078	0.11	0	0	0	0	0	0	0	0	0	0	0	0	0	3
338	Guanine nucleotide-binding protein G(q) subunit alpha OS=Homo sapiens GN=GN.A.Q PE=1 SV=4	GN.A.Q_HUMAN	42	5.37	Homo Sapiens	0	0	0	2	0	2	0	0	0	5	2	2	2	3	4	0	0	0	0.053	0	0.053	0	0	0	0.15	0.078	0.078	0.078	0.1	0.13	0	0	0	2	0	2	0	0	0	4	2	2	2	3
339	Syntaxin-binding protein 2 OS=Homo sapiens GN=STXBP2 PE=1 SV=2	STXB2_HUMAN	66	6.52	Homo Sapiens	2	0	2	0	0	3	0	0	0	2	2	3	0	2	2	0.067	0	0.067	0	0	0.064	0	0	0	0.061	0.047	0.064	0	0.047	0.044	2	0	2	0	0	3	0	0	0	2	2	3	0	2
340	14-3-3 protein theta OS=Homo sapiens GN=YWHAQ PE=1 SV=1	1433T_HUMAN	28	4.41	Homo Sapiens	0	0	0	0	0	0	0	0	0	4	4	0	0	0	0	0	0	0	0	0	0	0	0	0	0.18	0.18	0	0	0	0	0	0	0	0	0	0	0	0	0	2	2	0	0	0
341	Reticulon-4 OS=Homo sapiens GN=RTN4 PE=1 SV=2	RTN4_HUMAN	130	4.14	Homo Sapiens	2	2	2	3	4	3	0	0	0	4	2	6	2	4	3	0.014	0.014	0.014	0.026	0.026	0.023	0	0	0	0.034	0.023	0.034	0.023	0.034	0.037	2	2	2	3	3	2	0	0	0	3	2	3	2	3
342	Amine oxidase [flavin-containing] B OS=Homo sapiens GN=MAOB PE=1 SV=3	AOFB_HUMAN	59	7.55	Homo Sapiens	2	2	2	0	0	2	2	0	2	2	4	2	3	2	3	0.023	0.023	0.023	0	0	0.023	0.023	0	0.023	0.044	0.087	0.042	0.071	0.042	0.06	2	2	2	0	0	2	2	0	2	2	4	2	3	2
343	Cartilage acidic protein 1 OS=Homo sapiens GN=CRTAC1 PE=1 SV=2	CRAC1_HUMAN	71	4.73	Homo Sapiens	0	0	0	0	0	0	0	0	0	0	0	0	0	0	0	0	0	0	0	0	0	0	0	0	0	0	0	0	0	0	0	0	0	0	0	0	0	0	0	0	0	0	0	0
344	Protein 4.1 OS=Homo sapiens GN=EPB41 PE=1 SV=4	41_HUMAN	97	5.27	Homo Sapiens	0	0	0	0	0	0	0	0	0	0	0	0	0	0	0	0	0	0	0	0	0	0	0	0	0	0	0	0	0	0	0	0	0	0	0	0	0	0	0	0	0	0	0	0
345	Calponin-2 OS=Homo sapiens GN=CNN2 PE=1 SV=4	CNN2_HUMAN	34	7.38	Homo Sapiens	0	0	0	0	0	0	0	0	0	0	0	0	0	0	0	0	0	0	0	0	0	0	0	0	0	0	0	0	0	0	0	0	0	0	0	0	0	0	0	0	0	0	0	0
346	Beta-2-microglobulin OS=Homo sapiens GN=B2M PE=1 SV=1	B2MG_HUMAN	14	6.51	Homo Sapiens	0	0	0	0	0	0	0	0	0	0	0	0	0	0	0	0	0	0	0	0	0	0	0	0	0	0	0	0	0	0	0	0	0	0	0	0	0	0	0	0	0	0	0	0
347	Ig kappa chain V-II region GM607 (Fragment) OS=Homo sapiens PE=4 SV=1	KV205_HUMAN	13	7.25	Homo Sapiens	0	0	0	0	0	0	0	0	0	0	0	0	0	0	0	0	0	0	0	0	0	0	0	0	0	0	0	0	0	0	0	0	0	0	0	0	0	0	0	0	0	0	0	0
348	Fatty acid-binding protein, epidermal OS=Homo sapiens GN=FABP5 PE=1 SV=3	FABP5_HUMAN	15	7.05	Homo Sapiens	0	0	0	2	0	0	0	0	0	2	4	2	2	2	2	0	0	0	0.22	0	0	0	0	0	0.17	0.33	0.17	0.13	0.17	0.17	0	0	0	2	0	0	0	0	0	2	4	2	2	2
349	Pentraxin-related protein PTX3 OS=Homo sapiens GN=PTX3 PE=1 SV=3	PTX3_HUMAN	42	4.67	Homo Sapiens	0	0	0	0	0	0	0	0	0	0	0	0	0	0	0	0	0	0	0	0	0	0	0	0	0	0	0	0	0	0	0	0	0	0	0	0	0	0	0	0	0	0	0	0
350	Voltage-dependent anion-selective channel protein 3 OS=Homo sapiens GN=VDAC3 PE=1 SV=1	VDAC3_HUMAN	31	8.9	Homo Sapiens	0	0	0	0	2	2	0	0	0	3	4	2	2	4	2	0	0	0	0	0.12	0.078	0	0	0	0.12	0.16	0.085	0.085	0.2	0.085	0	0	0	0	2	2	0	0	0	3	4	2	2	4
351	Peptidyl-prolyl cis-trans isomerase F, mitochondrial OS=Homo sapiens GN=PPIF PE=1 SV=1	PPIF_HUMAN	22	9.95	Homo Sapiens	2	0	0	0	2	0	0	0	0	0	0	3	0	0	2	0.11	0	0	0	0.18	0	0	0	0	0	0	0.22	0	0	0.19	2	0	0	0	2	0	0	0	0	0	0	3	0	0
352	14-3-3 protein gamma OS=Homo sapiens GN=YWHAG PE=1 SV=2	1433G_HUMAN	28	4.52	Homo Sapiens	0	0	0	2	4	3	0	0	0	3	3	3	2	3	2	0	0	0	0.093	0.19	0.13	0	0	0	0.13	0.13	0.13	0.097	0.13	0.097	0	0	0	2	2	2	0	0	0	2	2	2	2	2
353	Keratin, type II cytoskeletal 78 OS=Homo sapiens GN=KRT78 PE=2 SV=2	K2C78_HUMAN	57	5.83	Homo Sapiens	0	0	0	0	0	0	0	0	0	9	5	10	7	4	0	0	0	0	0	0	0	0	0	0	0.16	0.12	0.15	0.11	0.069	0	0	0	0	0	0	0	0	0	0	7	4	5	3	2
354	Keratin, type I cuticular Ha1 OS=Homo sapiens GN=KRT31 PE=1 SV=3	K1H1_HUMAN	47	4.53	Homo Sapiens	0	0	0	0	0	0	0	0	0	6	6	0	0	0	0	0	0	0	0	0	0	0	0	0	0.14	0.14	0	0	0	0	0	0	0	0	0	0	0	0	0	2	2	0	0	0
355	Ras suppressor protein 1 OS=Homo sapiens GN=RSU1 PE=1 SV=3	RSU1_HUMAN	32	9.16	Homo Sapiens	0	0	0	2	2	2	0	0	0	4	2	0	0	0	2	0	0	0	0.12	0.12	0.12	0	0	0	0.15	0.072	0	0	0	0.072	0	0	0	2	2	2	0	0	0	4	2	0	0	0
356	Angiogenin OS=Homo sapiens GN=ANG PE=1 SV=1	ANGI_HUMAN	17	10.09	Homo Sapiens	0	0	0	0	0	0	0	0	0	0	0	2	0	0	0	0	0	0	0	0	0	0	0	0	0	0	0.17	0	0	0	0	0	0	0	0	0	0	0	0	0	0	2	0	0
357	Ras-related protein Rab-27B OS=Homo sapiens GN=RAB27B PE=1 SV=4	RB27B_HUMAN	25	5.13	Homo Sapiens	0	0	0	0	3	0	0	0	0	6	3	3	4	4	3	0	0	0	0	0.11	0	0	0	0	0.36	0.17	0.2	0.17	0.24	0.15	0	0	0	0	3	0	0	0	0	5	3	3	3	4
358	Peroxiredoxin-6 OS=Homo sapiens GN=PRDX6 PE=1 SV=3	PRDX6_HUMAN	25	6.29	Homo Sapiens	2	2	3	0	0	0	0	0	0	0	2	0	0	0	2	0.15	0.15	0.15	0	0	0	0	0	0	0	0.11	0	0	0	0.11	2	2	2	0	0	0	0	0	0	0	2	0	0	0
359	PregN.A.ncy zone protein OS=Homo sapiens GN=PZP PE=1 SV=4	PZP_HUMAN	164	6.33	Homo Sapiens	0	0	0	0	0	0	0	0	0	0	0	0	0	0	0	0	0	0	0	0	0	0	0	0	0	0	0	0	0	0	0	0	0	0	0	0	0	0	0	0	0	0	0	0
360	Receptor-type tyrosine-protein phosphatase eta OS=Homo sapiens GN=PTPRJ PE=1 SV=3	PTPRJ_HUMAN	146	5.28	Homo Sapiens	0	0	0	0	0	0	0	0	0	4	2	5	4	2	4	0	0	0	0	0	0	0	0	0	0.041	0.017	0.052	0.041	0.023	0.038	0	0	0	0	0	0	0	0	0	4	2	5	4	2
361	HLA class I histocompatibility antigen, B-78 alpha chain OS=Homo sapiens GN=HLA-B PE=1 SV=1	1B78_HUMAN	40	6.19	Homo Sapiens	0	0	0	0	0	0	0	0	0	0	0	0	0	0	0	0	0	0	0	0	0	0	0	0	0	0	0	0	0	0	0	0	0	0	0	0	0	0	0	0	0	0	0	0
362	Histone H3.2 OS=Homo sapiens GN=HIST2H3A PE=1 SV=3	H32_HUMAN	15	11.83	Homo Sapiens	0	0	0	0	0	0	0	0	0	0	0	0	0	0	0	0	0	0	0	0	0	0	0	0	0	0	0	0	0	0	0	0	0	0	0	0	0	0	0	0	0	0	0	0
363	Platelet-activating factor acetylhydrolase OS=Homo sapiens GN=PLA2G7 PE=1 SV=1	PAFA_HUMAN	50	7.61	Homo Sapiens	0	0	0	0	0	0	0	0	0	0	0	0	0	0	0	0	0	0	0	0	0	0	0	0	0	0	0	0	0	0	0	0	0	0	0	0	0	0	0	0	0	0	0	0
364	Tubulin beta-4B chain OS=Homo sapiens GN=TUBB4B PE=1 SV=1	TBB4B_HUMAN	50	4.52	Homo Sapiens	0	0	0	0	0	0	0	0	0	0	0	13	0	13	0	0	0	0	0	0	0	0	0	0	0	0	0.36	0	0.39	0	0	0	0	0	0	0	0	0	0	0	0	2	0	2
365	Peroxisomal multifunctioN.A.l enzyme type 2 OS=Homo sapiens GN=HSD17B4 PE=1 SV=3	DHB4_HUMAN	80	9.21	Homo Sapiens	0	0	0	0	0	0	0	0	0	5	4	3	2	3	5	0	0	0	0	0	0	0	0	0	0.091	0.071	0.056	0.039	0.056	0.092	0	0	0	0	0	0	0	0	0	5	4	3	2	3
366	Small proline-rich protein 2E OS=Homo sapiens GN=SPRR2E PE=2 SV=2	SPR2E_HUMAN	8	8.38	Homo Sapiens	0	0	0	0	0	0	0	0	0	5	4	5	6	6	5	0	0	0	0	0	0	0	0	0	0.49	0.49	0.31	0.49	0.49	0.67	0	0	0	0	0	0	0	0	0	3	3	2	3	3
367	Cytochrome b-c1 complex subunit 2, mitochondrial OS=Homo sapiens GN=UQCRC2 PE=1 SV=3	QCR2_HUMAN	48	8.92	Homo Sapiens	2	0	2	0	2	2	0	2	0	0	3	0	2	0	2	0.068	0	0.068	0	0.068	0.068	0	0.068	0	0	0.11	0	0.068	0	0.068	2	0	2	0	2	2	0	2	0	0	3	0	2	0
368	Carbonic anhydrase 1 OS=Homo sapiens GN=CA1 PE=1 SV=2	CAH1_HUMAN	29	7.14	Homo Sapiens	0	0	0	0	0	0	0	0	0	0	0	0	0	0	0	0	0	0	0	0	0	0	0	0	0	0	0	0	0	0	0	0	0	0	0	0	0	0	0	0	0	0	0	0
369	Ig heavy chain V-II region ARH-77 OS=Homo sapiens PE=4 SV=1	HV209_HUMAN	16	8.45	Homo Sapiens	0	0	0	0	0	0	0	0	0	0	0	0	0	2	0	0	0	0	0	0	0	0	0	0	0	0	0	0	0.17	0	0	0	0	0	0	0	0	0	0	0	0	0	0	2
370	B-cell receptor-associated protein 31 OS=Homo sapiens GN=BCAP31 PE=1 SV=3	BAP31_HUMAN	28	8.88	Homo Sapiens	0	0	0	0	2	0	2	0	2	0	0	2	2	2	0	0	0	0	0	0.1	0	0.1	0	0.1	0	0	0.073	0.077	0.073	0	0	0	0	0	2	0	2	0	2	0	0	2	2	2
371	Thyroxine-binding globulin OS=Homo sapiens GN=SERPIN.A.7 PE=1 SV=2	THBG_HUMAN	46	6.27	Homo Sapiens	0	0	0	0	0	0	0	0	0	0	0	0	0	0	0	0	0	0	0	0	0	0	0	0	0	0	0	0	0	0	0	0	0	0	0	0	0	0	0	0	0	0	0	0
372	Malate dehydrogeN.A.se, mitochondrial OS=Homo sapiens GN=MDH2 PE=1 SV=3	MDHM_HUMAN	36	8.9	Homo Sapiens	0	3	2	0	0	2	0	2	0	0	0	0	0	0	0	0	0.083	0.083	0	0	0.11	0	0.083	0	0	0	0	0	0	0	0	2	2	0	0	2	0	2	0	0	0	0	0	0
373	F-actin-capping protein subunit alpha-1 OS=Homo sapiens GN=CAPZA1 PE=1 SV=3	CAZA1_HUMAN	33	5.42	Homo Sapiens	0	0	0	0	0	0	0	0	0	2	2	4	3	2	0	0	0	0	0	0	0	0	0	0	0.12	0.13	0.19	0.19	0.12	0	0	0	0	0	0	0	0	0	0	2	2	3	3	2
374	Ras-related protein Rab-11B OS=Homo sapiens GN=RAB11B PE=1 SV=4	RB11B_HUMAN	24	5.73	Homo Sapiens	0	0	0	0	0	2	0	0	0	0	2	2	0	0	0	0	0	0	0	0	0.1	0	0	0	0	0.1	0.1	0	0	0	0	0	0	0	0	2	0	0	0	0	2	2	0	0
375	Syntaxin-11 OS=Homo sapiens GN=STX11 PE=1 SV=1	STX11_HUMAN	33	6.51	Homo Sapiens	0	2	0	0	0	0	0	0	0	2	2	3	2	0	2	0	0.07	0	0	0	0	0	0	0	0.08	0.087	0.12	0.087	0	0.08	0	2	0	0	0	0	0	0	0	2	2	3	2	0
376	Calreticulin OS=Homo sapiens GN=CALR PE=1 SV=1	CALR_HUMAN	48	4.04	Homo Sapiens	0	0	0	0	0	0	0	0	0	3	2	3	0	2	3	0	0	0	0	0	0	0	0	0	0.096	0.065	0.082	0	0.06	0.096	0	0	0	0	0	0	0	0	0	3	2	3	0	2
377	Actin-related protein 2/3 complex subunit 3 OS=Homo sapiens GN=ARPC3 PE=1 SV=3	ARPC3_HUMAN	21	8.83	Homo Sapiens	0	0	0	0	0	0	0	0	0	0	2	0	0	0	0	0	0	0	0	0	0	0	0	0	0	0.13	0	0	0	0	0	0	0	0	0	0	0	0	0	0	2	0	0	0
378	Cadherin-1 OS=Homo sapiens GN=CDH1 PE=1 SV=3	CADH1_HUMAN	97	4.33	Homo Sapiens	0	0	0	2	2	2	0	0	0	0	2	0	0	2	2	0	0	0	0.022	0.022	0.022	0	0	0	0	0.022	0	0	0.022	0.022	0	0	0	2	2	2	0	0	0	0	2	0	0	2
379	Peroxiredoxin-1 OS=Homo sapiens GN=PRDX1 PE=1 SV=1	PRDX1_HUMAN	22	8.31	Homo Sapiens	0	0	0	2	3	4	0	0	0	3	0	0	0	0	2	0	0	0	0.17	0.22	0.32	0	0	0	0.15	0	0	0	0	0.09	0	0	0	2	3	4	0	0	0	2	0	0	0	0
380	Voltage-dependent anion-selective channel protein 2 OS=Homo sapiens GN=VDAC2 PE=1 SV=2	VDAC2_HUMAN	32	7.65	Homo Sapiens	0	0	0	0	0	0	0	0	0	4	3	2	2	3	0	0	0	0	0	0	0	0	0	0	0.18	0.15	0.095	0.11	0.13	0	0	0	0	0	0	0	0	0	0	4	3	2	2	3
381	Ras-related protein Rab-14 OS=Homo sapiens GN=RAB14 PE=1 SV=4	RAB14_HUMAN	24	6.13	Homo Sapiens	0	0	0	0	0	0	0	0	0	0	3	0	0	0	0	0	0	0	0	0	0	0	0	0	0	0.26	0	0	0	0	0	0	0	0	0	0	0	0	0	0	2	0	0	0
382	Stromal interaction molecule 1 OS=Homo sapiens GN=STIM1 PE=1 SV=3	STIM1_HUMAN	77	6.65	Homo Sapiens	0	0	0	0	0	0	0	0	0	4	2	2	3	4	2	0	0	0	0	0	0	0	0	0	0.073	0.06	0.031	0.061	0.06	0.047	0	0	0	0	0	0	0	0	0	4	2	2	3	3
383	Proline-serine-threonine phosphatase-interacting protein 2 OS=Homo sapiens GN=PSTPIP2 PE=1 SV=4	PPIP2_HUMAN	39	8.68	Homo Sapiens	0	0	0	0	0	0	0	0	0	0	2	0	0	0	3	0	0	0	0	0	0	0	0	0	0	0.069	0	0	0	0.12	0	0	0	0	0	0	0	0	0	0	2	0	0	0
384	Collagen alpha-1(VI) chain OS=Homo sapiens GN=COL6A1 PE=1 SV=3	CO6A1_HUMAN	109	5.05	Homo Sapiens	0	0	0	0	0	0	0	0	0	0	0	0	0	0	0	0	0	0	0	0	0	0	0	0	0	0	0	0	0	0	0	0	0	0	0	0	0	0	0	0	0	0	0	0
385	Four and a half LIM domains protein 1 OS=Homo sapiens GN=FHL1 PE=1 SV=4	FHL1_HUMAN	36	9.15	Homo Sapiens	0	0	0	0	2	2	0	0	0	2	3	2	0	0	0	0	0	0	0	0.068	0.068	0	0	0	0.068	0.11	0.068	0	0	0	0	0	0	0	2	2	0	0	0	2	3	2	0	0
386	Coagulation factor VIII OS=Homo sapiens GN=F8 PE=1 SV=1	FA8_HUMAN	267	7.37	Homo Sapiens	0	0	0	0	0	0	0	0	0	0	0	0	0	0	0	0	0	0	0	0	0	0	0	0	0	0	0	0	0	0	0	0	0	0	0	0	0	0	0	0	0	0	0	0
387	Ig kappa chain V-III region VG (Fragment) OS=Homo sapiens PE=1 SV=1	KV309_HUMAN	13	4.59	Homo Sapiens	0	0	0	0	0	0	0	0	0	0	0	0	0	0	0	0	0	0	0	0	0	0	0	0	0	0	0	0	0	0	0	0	0	0	0	0	0	0	0	0	0	0	0	0
388	Carcinoembryonic antigen-related cell adhesion molecule 8 OS=Homo sapiens GN=CEACAM8 PE=1 SV=2	CEAM8_HUMAN	38	7.45	Homo Sapiens	0	0	0	0	0	0	0	0	0	0	0	0	0	0	0	0	0	0	0	0	0	0	0	0	0	0	0	0	0	0	0	0	0	0	0	0	0	0	0	0	0	0	0	0
389	Tropomyosin beta chain OS=Homo sapiens GN=TPM2 PE=1 SV=1	TPM2_HUMAN	33	4.36	Homo Sapiens	0	0	0	0	0	0	0	0	0	0	0	0	0	9	0	0	0	0	0	0	0	0	0	0	0	0	0	0	0.24	0	0	0	0	0	0	0	0	0	0	0	0	0	0	2
390	SyN.A.ptosomal-associated protein 23 OS=Homo sapiens GN=SN.A.P23 PE=1 SV=1	SNP23_HUMAN	23	4.62	Homo Sapiens	0	0	0	0	0	0	0	0	0	0	2	0	0	2	0	0	0	0	0	0	0	0	0	0	0	0.14	0	0	0.15	0	0	0	0	0	0	0	0	0	0	0	2	0	0	2
391	Protein disulfide-isomerase OS=Homo sapiens GN=P4HB PE=1 SV=3	PDIA1_HUMAN	57	4.49	Homo Sapiens	0	0	0	0	0	0	0	0	0	0	2	0	2	2	0	0	0	0	0	0	0	0	0	0	0	0.055	0	0.055	0.047	0	0	0	0	0	0	0	0	0	0	0	2	0	2	2
392	Ig kappa chain V-I region DEE OS=Homo sapiens PE=1 SV=1	KV105_HUMAN	12	9.71	Homo Sapiens	0	0	0	0	0	0	0	0	0	0	0	0	0	0	0	0	0	0	0	0	0	0	0	0	0	0	0	0	0	0	0	0	0	0	0	0	0	0	0	0	0	0	0	0
393	Ig kappa chain V-I region Wes OS=Homo sapiens PE=1 SV=1	KV119_HUMAN	12	7.41	Homo Sapiens	0	0	0	0	0	0	0	0	0	0	0	0	0	0	0	0	0	0	0	0	0	0	0	0	0	0	0	0	0	0	0	0	0	0	0	0	0	0	0	0	0	0	0	0
394	Prohibitin-2 OS=Homo sapiens GN=PHB2 PE=1 SV=2	PHB2_HUMAN	33	10.41	Homo Sapiens	0	0	0	0	0	0	0	0	0	2	3	2	0	2	2	0	0	0	0	0	0	0	0	0	0.067	0.12	0.067	0	0.097	0.067	0	0	0	0	0	0	0	0	0	2	3	2	0	2
395	Bridging integrator 2 OS=Homo sapiens GN=BIN2 PE=1 SV=3	BIN2_HUMAN	62	4.82	Homo Sapiens	0	0	0	0	0	0	0	0	0	0	0	0	0	0	0	0	0	0	0	0	0	0	0	0	0	0	0	0	0	0	0	0	0	0	0	0	0	0	0	0	0	0	0	0
396	Actin-related protein 2/3 complex subunit 2 OS=Homo sapiens GN=ARPC2 PE=1 SV=1	ARPC2_HUMAN	34	7.4	Homo Sapiens	0	0	0	0	0	0	0	0	0	0	2	0	0	0	2	0	0	0	0	0	0	0	0	0	0	0.083	0	0	0	0.083	0	0	0	0	0	0	0	0	0	0	2	0	0	0
397	TransitioN.A.l endoplasmic reticulum ATPase OS=Homo sapiens GN=VCP PE=1 SV=4	TERA_HUMAN	89	4.89	Homo Sapiens	0	2	0	0	0	0	0	0	0	0	2	0	0	0	0	0	0.04	0	0	0	0	0	0	0	0	0.032	0	0	0	0	0	2	0	0	0	0	0	0	0	0	2	0	0	0
398	Nexilin OS=Homo sapiens GN=NEXN PE=1 SV=1	NEXN_HUMAN	81	4.99	Homo Sapiens	0	0	0	0	0	0	0	0	0	0	0	0	0	0	0	0	0	0	0	0	0	0	0	0	0	0	0	0	0	0	0	0	0	0	0	0	0	0	0	0	0	0	0	0
399	Ras-related C3 botulinum toxin substrate 1 OS=Homo sapiens GN=RAC1 PE=1 SV=1	RAC1_HUMAN	21	8.65	Homo Sapiens	3	0	0	0	0	0	0	0	0	0	0	0	0	0	0	0.14	0	0	0	0	0	0	0	0	0	0	0	0	0	0	3	0	0	0	0	0	0	0	0	0	0	0	0	0
400	AntileukoproteiN.A.se OS=Homo sapiens GN=SLPI PE=1 SV=2	SLPI_HUMAN	14	8.85	Homo Sapiens	0	0	0	0	0	0	0	0	0	0	0	0	0	0	0	0	0	0	0	0	0	0	0	0	0	0	0	0	0	0	0	0	0	0	0	0	0	0	0	0	0	0	0	0
401	Elongation factor Tu, mitochondrial OS=Homo sapiens GN=TUFM PE=1 SV=2	EFTU_HUMAN	50	7.68	Homo Sapiens	3	0	0	0	0	2	0	0	0	0	2	0	0	0	0	0.066	0	0	0	0	0.051	0	0	0	0	0.058	0	0	0	0	3	0	0	0	0	2	0	0	0	0	2	0	0	0
402	G-protein coupled receptor 126 OS=Homo sapiens GN=GPR126 PE=1 SV=3	GP126_HUMAN	137	7.91	Homo Sapiens	0	0	0	0	0	0	0	0	0	0	0	0	0	0	0	0	0	0	0	0	0	0	0	0	0	0	0	0	0	0	0	0	0	0	0	0	0	0	0	0	0	0	0	0
403	HeparaN.A.se OS=Homo sapiens GN=HPSE PE=1 SV=2	HPSE_HUMAN	61	9.71	Homo Sapiens	0	0	0	0	0	0	0	0	0	0	0	0	0	0	0	0	0	0	0	0	0	0	0	0	0	0	0	0	0	0	0	0	0	0	0	0	0	0	0	0	0	0	0	0
404	Plastin-2 OS=Homo sapiens GN=LCP1 PE=1 SV=6	PLSL_HUMAN	70	5.07	Homo Sapiens	0	0	0	0	0	0	0	0	0	0	0	0	0	0	0	0	0	0	0	0	0	0	0	0	0	0	0	0	0	0	0	0	0	0	0	0	0	0	0	0	0	0	0	0
405	Phospholipase A2, membrane associated OS=Homo sapiens GN=PLA2G2A PE=1 SV=2	PA2GA_HUMAN	16	9.51	Homo Sapiens	0	0	0	0	0	0	0	0	0	0	0	0	0	0	0	0	0	0	0	0	0	0	0	0	0	0	0	0	0	0	0	0	0	0	0	0	0	0	0	0	0	0	0	0
406	Caspase-14 OS=Homo sapiens GN=CASP14 PE=1 SV=2	CASPE_HUMAN	28	5.28	Homo Sapiens	0	0	0	0	0	0	0	0	0	3	0	0	0	0	0	0	0	0	0	0	0	0	0	0	0.079	0	0	0	0	0	0	0	0	0	0	0	0	0	0	2	0	0	0	0
407	Extracellular matrix protein 1 OS=Homo sapiens GN=ECM1 PE=1 SV=2	ECM1_HUMAN	61	6.7	Homo Sapiens	0	0	0	0	0	0	0	0	0	2	3	0	0	0	0	0	0	0	0	0	0	0	0	0	0.061	0.061	0	0	0	0	0	0	0	0	0	0	0	0	0	2	2	0	0	0
408	Protein S100-A4 OS=Homo sapiens GN=S100A4 PE=1 SV=1	S10A4_HUMAN	12	5.92	Homo Sapiens	0	0	0	0	0	0	0	0	0	0	0	0	0	0	0	0	0	0	0	0	0	0	0	0	0	0	0	0	0	0	0	0	0	0	0	0	0	0	0	0	0	0	0	0
409	Tropomyosin alpha-1 chain OS=Homo sapiens GN=TPM1 PE=1 SV=2	TPM1_HUMAN	33	4.39	Homo Sapiens	0	0	0	0	7	0	0	0	0	0	0	0	0	0	0	0	0	0	0	0.23	0	0	0	0	0	0	0	0	0	0	0	0	0	0	2	0	0	0	0	0	0	0	0	0
410	Ig heavy chain V-I region V35 OS=Homo sapiens PE=1 SV=1	HV103_HUMAN	13	9.87	Homo Sapiens	0	0	0	0	0	0	0	0	0	0	0	0	0	0	0	0	0	0	0	0	0	0	0	0	0	0	0	0	0	0	0	0	0	0	0	0	0	0	0	0	0	0	0	0
411	Trem-like transcript 1 protein OS=Homo sapiens GN=TREML1 PE=1 SV=2	TRML1_HUMAN	33	5.95	Homo Sapiens	0	0	0	0	0	0	0	0	0	2	0	3	2	2	0	0	0	0	0	0	0	0	0	0	0.074	0	0.17	0.074	0.074	0	0	0	0	0	0	0	0	0	0	2	0	3	2	2
412	N.A.D(P) transhydrogeN.A.se, mitochondrial OS=Homo sapiens GN=NNT PE=1 SV=3	NNTM_HUMAN	114	8.21	Homo Sapiens	2	0	0	0	0	2	0	0	0	5	2	0	2	2	0	0.026	0	0	0	0	0.026	0	0	0	0.046	0.023	0	0.026	0.029	0	2	0	0	0	0	2	0	0	0	4	2	0	2	2
413	Tetranectin OS=Homo sapiens GN=CLEC3B PE=1 SV=3	TETN_HUMAN	23	5.36	Homo Sapiens	0	0	0	0	0	0	0	0	0	0	0	2	0	0	4	0	0	0	0	0	0	0	0	0	0	0	0.11	0	0	0.31	0	0	0	0	0	0	0	0	0	0	0	2	0	0
414	Calmodulin OS=Homo sapiens GN=CALM1 PE=1 SV=2	CALM_HUMAN	17	3.84	Homo Sapiens	0	0	0	0	4	0	0	0	0	0	0	3	0	0	3	0	0	0	0	0.39	0	0	0	0	0	0	0.18	0	0	0.18	0	0	0	0	3	0	0	0	0	0	0	2	0	0
415	Histone H1.3 OS=Homo sapiens GN=HIST1H1D PE=1 SV=2	H13_HUMAN	22	11.79	Homo Sapiens	2	0	0	0	0	0	0	0	0	0	0	0	0	0	0	0.072	0	0	0	0	0	0	0	0	0	0	0	0	0	0	2	0	0	0	0	0	0	0	0	0	0	0	0	0
416	Ig kappa chain V-I region HK102 (Fragment) OS=Homo sapiens GN=IGKV1-5 PE=4 SV=1	KV110_HUMAN	13	8.46	Homo Sapiens	0	0	0	0	0	0	0	0	0	3	2	0	3	0	0	0	0	0	0	0	0	0	0	0	0.4	0.31	0	0.4	0	0	0	0	0	0	0	0	0	0	0	3	2	0	3	0
417	Versican core protein OS=Homo sapiens GN=VCAN PE=1 SV=3	CSPG2_HUMAN	373	4.15	Homo Sapiens	0	0	0	0	0	0	0	0	0	0	0	0	0	0	0	0	0	0	0	0	0	0	0	0	0	0	0	0	0	0	0	0	0	0	0	0	0	0	0	0	0	0	0	0
418	Ras-related protein Rab-7a OS=Homo sapiens GN=RAB7A PE=1 SV=1	RAB7A_HUMAN	23	6.59	Homo Sapiens	0	0	0	0	0	0	0	0	0	2	0	0	0	0	0	0	0	0	0	0	0	0	0	0	0.12	0	0	0	0	0	0	0	0	0	0	0	0	0	0	2	0	0	0	0
419	Skin-specific protein 32 OS=Homo sapiens GN=XP32 PE=1 SV=1	XP32_HUMAN	26	7.99	Homo Sapiens	0	0	0	0	0	0	0	0	0	0	0	0	0	0	2	0	0	0	0	0	0	0	0	0	0	0	0	0	0	0.076	0	0	0	0	0	0	0	0	0	0	0	0	0	0
420	Alpha-actinin-4 OS=Homo sapiens GN=ACTN4 PE=1 SV=2	ACTN4_HUMAN	105	5.12	Homo Sapiens	0	0	0	7	0	0	0	0	0	0	0	0	0	0	0	0	0	0	0.094	0	0	0	0	0	0	0	0	0	0	0	0	0	0	2	0	0	0	0	0	0	0	0	0	0
421	Malectin OS=Homo sapiens GN=MLEC PE=1 SV=1	MLEC_HUMAN	32	5.09	Homo Sapiens	0	0	0	0	0	0	0	0	0	3	2	2	3	2	5	0	0	0	0	0	0	0	0	0	0.13	0.072	0.11	0.11	0.11	0.18	0	0	0	0	0	0	0	0	0	3	2	2	2	2
422	Cytochrome c oxidase subunit 5A, mitochondrial OS=Homo sapiens GN=COX5A PE=1 SV=2	COX5A_HUMAN	17	6.78	Homo Sapiens	0	0	0	0	0	2	0	0	0	0	0	0	0	0	0	0	0	0	0	0	0.067	0	0	0	0	0	0	0	0	0	0	0	0	0	0	2	0	0	0	0	0	0	0	0
423	Dolichyl-diphosphooligosaccharide--protein glycosyltransferase subunit 1 OS=Homo sapiens GN=RPN1 PE=1 SV=1	RPN1_HUMAN	69	6.34	Homo Sapiens	0	0	0	0	0	0	0	0	0	0	0	2	0	0	0	0	0	0	0	0	0	0	0	0	0	0	0.036	0	0	0	0	0	0	0	0	0	0	0	0	0	0	2	0	0
424	IgGFc-binding protein OS=Homo sapiens GN=FCGBP PE=1 SV=3	FCGBP_HUMAN	572	4.99	Homo Sapiens	0	0	0	0	0	0	0	0	0	0	0	0	0	0	0	0	0	0	0	0	0	0	0	0	0	0	0	0	0	0	0	0	0	0	0	0	0	0	0	0	0	0	0	0
425	Extended syN.A.ptotagmin-1 OS=Homo sapiens GN=ESYT1 PE=1 SV=1	ESYT1_HUMAN	123	5.61	Homo Sapiens	0	0	2	0	0	0	0	0	0	0	2	2	0	0	0	0	0	0.019	0	0	0	0	0	0	0	0.023	0.019	0	0	0	0	0	2	0	0	0	0	0	0	0	2	2	0	0
426	Stress-70 protein, mitochondrial OS=Homo sapiens GN=HSPA9 PE=1 SV=2	GRP75_HUMAN	74	6.01	Homo Sapiens	0	0	0	0	3	0	0	0	0	0	0	3	0	2	2	0	0	0	0	0.057	0	0	0	0	0	0	0.054	0	0.034	0.034	0	0	0	0	3	0	0	0	0	0	0	3	0	2
427	Keratin, type II cytoskeletal 1b OS=Homo sapiens GN=KRT77 PE=2 SV=3	K2C1B_HUMAN	62	5.78	Homo Sapiens	0	0	0	0	0	0	0	0	0	15	14	10	0	0	0	0	0	0	0	0	0	0	0	0	0.071	0.085	0.11	0	0	0	0	0	0	0	0	0	0	0	0	2	2	2	0	0
428	Aminopeptidase N OS=Homo sapiens GN=ANPEP PE=1 SV=4	AMPN_HUMAN	110	5.14	Homo Sapiens	0	0	0	0	0	0	0	0	0	0	0	0	0	0	0	0	0	0	0	0	0	0	0	0	0	0	0	0	0	0	0	0	0	0	0	0	0	0	0	0	0	0	0	0
429	Protein G6b OS=Homo sapiens GN=G6B PE=1 SV=1	G6B_HUMAN	26	10.08	Homo Sapiens	0	0	0	0	0	0	0	0	0	0	2	2	2	2	2	0	0	0	0	0	0	0	0	0	0	0.083	0.091	0.091	0.091	0.091	0	0	0	0	0	0	0	0	0	0	2	2	2	2
430	HexokiN.A.se-1 OS=Homo sapiens GN=HK1 PE=1 SV=3	HXK1_HUMAN	102	6.78	Homo Sapiens	0	0	0	0	0	0	0	0	0	2	0	2	2	3	0	0	0	0	0	0	0	0	0	0	0.024	0	0.024	0.024	0.04	0	0	0	0	0	0	0	0	0	0	2	0	2	2	3
431	Polymeric immunoglobulin receptor OS=Homo sapiens GN=PIGR PE=1 SV=4	PIGR_HUMAN	83	5.43	Homo Sapiens	0	0	0	0	0	0	0	0	0	0	0	0	0	0	0	0	0	0	0	0	0	0	0	0	0	0	0	0	0	0	0	0	0	0	0	0	0	0	0	0	0	0	0	0
432	Dematin OS=Homo sapiens GN=DMTN PE=1 SV=3	DEMA_HUMAN	46	9.36	Homo Sapiens	0	0	0	0	0	0	0	0	0	0	0	0	0	0	0	0	0	0	0	0	0	0	0	0	0	0	0	0	0	0	0	0	0	0	0	0	0	0	0	0	0	0	0	0
433	Actin-related protein 2/3 complex subunit 4 OS=Homo sapiens GN=ARPC4 PE=1 SV=3	ARPC4_HUMAN	20	8.71	Homo Sapiens	0	0	0	0	0	0	0	0	0	0	0	2	2	0	0	0	0	0	0	0	0	0	0	0	0	0	0.11	0.11	0	0	0	0	0	0	0	0	0	0	0	0	0	2	2	0
434	Ribonuclease 4 OS=Homo sapiens GN=RN.A.SE4 PE=1 SV=3	RN.A.S4_HUMAN	17	9.17	Homo Sapiens	0	0	0	0	0	0	0	0	0	0	0	0	0	0	0	0	0	0	0	0	0	0	0	0	0	0	0	0	0	0	0	0	0	0	0	0	0	0	0	0	0	0	0	0
435	Tryptophan--tRN.A. ligase, cytoplasmic OS=Homo sapiens GN=WARS PE=1 SV=2	SYWC_HUMAN	53	6.15	Homo Sapiens	0	0	0	0	0	0	0	0	0	0	0	0	0	0	0	0	0	0	0	0	0	0	0	0	0	0	0	0	0	0	0	0	0	0	0	0	0	0	0	0	0	0	0	0
436	Microtubule-associated protein RP/EB family member 2 OS=Homo sapiens GN=MAPRE2 PE=1 SV=1	MARE2_HUMAN	37	5.28	Homo Sapiens	0	0	0	0	0	2	0	0	0	0	0	0	0	0	0	0	0	0	0	0	0.11	0	0	0	0	0	0	0	0	0	0	0	0	0	0	2	0	0	0	0	0	0	0	0
437	Protein diaphanous homolog 1 OS=Homo sapiens GN=DIAPH1 PE=1 SV=2	DIAP1_HUMAN	141	5.07	Homo Sapiens	0	0	0	0	0	0	0	0	0	2	0	0	0	0	0	0	0	0	0	0	0	0	0	0	0.018	0	0	0	0	0	0	0	0	0	0	0	0	0	0	2	0	0	0	0
438	Guanine nucleotide-binding protein G(I)/G(S)/G(O) subunit gamma-5 OS=Homo sapiens GN=GNG5 PE=1 SV=3	GBG5_HUMAN	7	10.62	Homo Sapiens	0	0	0	0	2	0	0	0	0	0	0	0	0	0	0	0	0	0	0	0.29	0	0	0	0	0	0	0	0	0	0	0	0	0	0	2	0	0	0	0	0	0	0	0	0
439	Reelin OS=Homo sapiens GN=RELN PE=1 SV=3	RELN_HUMAN	388	5.74	Homo Sapiens	0	0	0	0	0	0	0	0	0	0	0	0	0	0	0	0	0	0	0	0	0	0	0	0	0	0	0	0	0	0	0	0	0	0	0	0	0	0	0	0	0	0	0	0
440	Bactericidal permeability-increasing protein OS=Homo sapiens GN=BPI PE=1 SV=4	BPI_HUMAN	54	9.89	Homo Sapiens	0	0	0	0	0	0	0	0	0	0	0	0	0	0	0	0	0	0	0	0	0	0	0	0	0	0	0	0	0	0	0	0	0	0	0	0	0	0	0	0	0	0	0	0
441	High affinity immunoglobulin epsilon receptor subunit gamma OS=Homo sapiens GN=FCER1G PE=1 SV=1	FCERG_HUMAN	10	7.25	Homo Sapiens	0	0	0	0	0	0	0	0	0	0	0	0	0	0	0	0	0	0	0	0	0	0	0	0	0	0	0	0	0	0	0	0	0	0	0	0	0	0	0	0	0	0	0	0
442	Peptidoglycan recognition protein 1 OS=Homo sapiens GN=PGLYRP1 PE=1 SV=1	PGRP1_HUMAN	22	8.68	Homo Sapiens	0	0	0	0	0	0	0	0	0	0	0	0	0	0	0	0	0	0	0	0	0	0	0	0	0	0	0	0	0	0	0	0	0	0	0	0	0	0	0	0	0	0	0	0
443	Thioredoxin OS=Homo sapiens GN=TXN PE=1 SV=3	THIO_HUMAN	12	4.55	Homo Sapiens	0	0	0	0	0	0	0	0	0	3	2	3	0	2	3	0	0	0	0	0	0	0	0	0	0.3	0.19	0.3	0	0.21	0.3	0	0	0	0	0	0	0	0	0	3	2	3	0	2
444	Phosphate carrier protein, mitochondrial OS=Homo sapiens GN=SLC25A3 PE=1 SV=2	MPCP_HUMAN	40	9.79	Homo Sapiens	0	0	0	0	0	3	0	0	0	0	2	0	0	0	3	0	0	0	0	0	0.072	0	0	0	0	0.055	0	0	0	0.086	0	0	0	0	0	3	0	0	0	0	2	0	0	0
445	Plakophilin-1 OS=Homo sapiens GN=PKP1 PE=1 SV=2	PKP1_HUMAN	83	9.41	Homo Sapiens	0	0	0	0	0	0	0	0	0	3	2	0	0	0	0	0	0	0	0	0	0	0	0	0	0.05	0.035	0	0	0	0	0	0	0	0	0	0	0	0	0	3	2	0	0	0
446	Coagulation factor XIII B chain OS=Homo sapiens GN=F13B PE=1 SV=3	F13B_HUMAN	76	6.36	Homo Sapiens	0	0	0	2	0	0	0	0	0	0	0	2	2	2	0	0	0	0	0.036	0	0	0	0	0	0	0	0.039	0.039	0.039	0	0	0	0	2	0	0	0	0	0	0	0	2	2	2
447	Ras-related protein Rab-6B OS=Homo sapiens GN=RAB6B PE=1 SV=1	RAB6B_HUMAN	23	5.14	Homo Sapiens	0	0	0	0	0	0	0	0	0	0	0	4	0	0	0	0	0	0	0	0	0	0	0	0	0	0	0.17	0	0	0	0	0	0	0	0	0	0	0	0	0	0	2	0	0
448	Flotillin-1 OS=Homo sapiens GN=FLOT1 PE=1 SV=3	FLOT1_HUMAN	47	7.58	Homo Sapiens	0	0	0	0	0	0	0	0	0	0	0	0	0	0	0	0	0	0	0	0	0	0	0	0	0	0	0	0	0	0	0	0	0	0	0	0	0	0	0	0	0	0	0	0
449	Receptor-type tyrosine-protein phosphatase C OS=Homo sapiens GN=PTPRC PE=1 SV=2	PTPRC_HUMAN	147	6.08	Homo Sapiens	0	0	0	0	0	0	0	0	0	0	0	0	0	0	0	0	0	0	0	0	0	0	0	0	0	0	0	0	0	0	0	0	0	0	0	0	0	0	0	0	0	0	0	0
450	CD226 antigen OS=Homo sapiens GN=CD226 PE=1 SV=2	CD226_HUMAN	39	8.04	Homo Sapiens	0	0	0	0	0	0	0	0	0	0	2	0	0	0	0	0	0	0	0	0	0	0	0	0	0	0.1	0	0	0	0	0	0	0	0	0	0	0	0	0	0	2	0	0	0
451	Cystatin-A OS=Homo sapiens GN=CSTA PE=1 SV=1	CYTA_HUMAN	11	5.17	Homo Sapiens	0	0	0	0	0	0	0	0	0	0	0	0	0	0	0	0	0	0	0	0	0	0	0	0	0	0	0	0	0	0	0	0	0	0	0	0	0	0	0	0	0	0	0	0
452	Cytochrome b-c1 complex subunit 1, mitochondrial OS=Homo sapiens GN=UQCRC1 PE=1 SV=3	QCR1_HUMAN	53	6.32	Homo Sapiens	0	0	0	0	0	0	0	0	0	2	0	0	0	0	2	0	0	0	0	0	0	0	0	0	0.046	0	0	0	0	0.05	0	0	0	0	0	0	0	0	0	2	0	0	0	0
453	Ig heavy chain V-II region SESS OS=Homo sapiens PE=2 SV=1	HV208_HUMAN	16	7.18	Homo Sapiens	0	0	0	0	0	0	0	0	0	0	0	0	0	0	0	0	0	0	0	0	0	0	0	0	0	0	0	0	0	0	0	0	0	0	0	0	0	0	0	0	0	0	0	0
454	Protein disulfide-isomerase A6 OS=Homo sapiens GN=PDIA6 PE=1 SV=1	PDIA6_HUMAN	48	4.7	Homo Sapiens	0	2	0	0	0	0	0	0	0	0	0	0	0	0	0	0	0.057	0	0	0	0	0	0	0	0	0	0	0	0	0	0	2	0	0	0	0	0	0	0	0	0	0	0	0
455	Lymphocyte antigen 6 complex locus protein G6f OS=Homo sapiens GN=LY6G6F PE=1 SV=2	LY66F_HUMAN	32	8.65	Homo Sapiens	0	0	2	2	0	0	0	0	0	0	0	0	0	0	0	0	0	0.077	0.077	0	0	0	0	0	0	0	0	0	0	0	0	0	2	2	0	0	0	0	0	0	0	0	0	0
456	Basigin OS=Homo sapiens GN=BSG PE=1 SV=2	BASI_HUMAN	42	5.4	Homo Sapiens	0	0	0	0	0	0	0	0	0	2	0	2	0	0	0	0	0	0	0	0	0	0	0	0	0.088	0	0.088	0	0	0	0	0	0	0	0	0	0	0	0	2	0	2	0	0
457	Cytoplasmic FMR1-interacting protein 1 OS=Homo sapiens GN=CYFIP1 PE=1 SV=1	CYFP1_HUMAN	145	6.9	Homo Sapiens	0	0	0	0	0	0	0	0	0	0	2	2	0	2	3	0	0	0	0	0	0	0	0	0	0	0.022	0.018	0	0.018	0.024	0	0	0	0	0	0	0	0	0	0	2	2	0	2
458	ATP synthase subunit O, mitochondrial OS=Homo sapiens GN=ATP5O PE=1 SV=1	ATPO_HUMAN	23	10.61	Homo Sapiens	0	0	0	0	0	0	0	0	0	0	0	0	0	0	0	0	0	0	0	0	0	0	0	0	0	0	0	0	0	0	0	0	0	0	0	0	0	0	0	0	0	0	0	0
459	Glycerol-3-phosphate dehydrogeN.A.se, mitochondrial OS=Homo sapiens GN=GPD2 PE=1 SV=3	GPDM_HUMAN	81	7.77	Homo Sapiens	0	0	0	0	0	0	0	0	0	2	0	0	0	0	0	0	0	0	0	0	0	0	0	0	0.034	0	0	0	0	0	0	0	0	0	0	0	0	0	0	2	0	0	0	0
460	Serglycin OS=Homo sapiens GN=SRGN PE=1 SV=3	SRGN_HUMAN	18	4.57	Homo Sapiens	0	0	0	0	0	0	0	0	0	0	0	0	0	0	0	0	0	0	0	0	0	0	0	0	0	0	0	0	0	0	0	0	0	0	0	0	0	0	0	0	0	0	0	0
461	Poly(rC)-binding protein 1 OS=Homo sapiens GN=PCBP1 PE=1 SV=2	PCBP1_HUMAN	37	7.11	Homo Sapiens	0	0	0	0	0	0	0	0	0	0	0	0	0	0	0	0	0	0	0	0	0	0	0	0	0	0	0	0	0	0	0	0	0	0	0	0	0	0	0	0	0	0	0	0
462	Heat shock 70 kDa protein 1A/1B OS=Homo sapiens GN=HSPA1A PE=1 SV=5	HSP71_HUMAN	70	5.47	Homo Sapiens	0	0	0	0	0	0	0	0	0	0	0	0	0	0	0	0	0	0	0	0	0	0	0	0	0	0	0	0	0	0	0	0	0	0	0	0	0	0	0	0	0	0	0	0
463	ManN.A.n-binding lectin serine protease 2 OS=Homo sapiens GN=MASP2 PE=1 SV=4	MASP2_HUMAN	76	5.37	Homo Sapiens	0	0	0	0	0	0	0	0	0	0	0	0	0	0	0	0	0	0	0	0	0	0	0	0	0	0	0	0	0	0	0	0	0	0	0	0	0	0	0	0	0	0	0	0
464	Lumican OS=Homo sapiens GN=LUM PE=1 SV=2	LUM_HUMAN	38	6.6	Homo Sapiens	0	0	0	0	0	0	0	0	0	3	3	4	0	2	3	0	0	0	0	0	0	0	0	0	0.095	0.095	0.095	0	0.065	0.065	0	0	0	0	0	0	0	0	0	3	3	3	0	2
465	Glutathione peroxidase 1 OS=Homo sapiens GN=GPX1 PE=1 SV=4	GPX1_HUMAN	22	6.51	Homo Sapiens	0	0	0	0	0	0	0	0	0	0	3	2	0	0	0	0	0	0	0	0	0	0	0	0	0	0.18	0.13	0	0	0	0	0	0	0	0	0	0	0	0	0	3	2	0	0
466	SyN.A.ptotagmin-like protein 4 OS=Homo sapiens GN=SYTL4 PE=1 SV=2	SYTL4_HUMAN	76	9.42	Homo Sapiens	0	0	0	0	0	0	0	0	0	0	0	0	0	0	0	0	0	0	0	0	0	0	0	0	0	0	0	0	0	0	0	0	0	0	0	0	0	0	0	0	0	0	0	0
467	ATP synthase subunit delta, mitochondrial OS=Homo sapiens GN=ATP5D PE=1 SV=2	ATPD_HUMAN	17	5.19	Homo Sapiens	0	0	0	0	0	0	0	0	0	0	3	0	0	0	0	0	0	0	0	0	0	0	0	0	0	0.14	0	0	0	0	0	0	0	0	0	0	0	0	0	0	2	0	0	0
468	Collagen alpha-2(VI) chain OS=Homo sapiens GN=COL6A2 PE=1 SV=4	CO6A2_HUMAN	109	6.13	Homo Sapiens	0	0	0	0	0	0	0	0	0	0	0	0	0	0	0	0	0	0	0	0	0	0	0	0	0	0	0	0	0	0	0	0	0	0	0	0	0	0	0	0	0	0	0	0
469	Proprotein convertase subtilisin/kexin type 9 OS=Homo sapiens GN=PCSK9 PE=1 SV=3	PCSK9_HUMAN	74	6.59	Homo Sapiens	0	0	0	0	0	0	0	0	0	0	0	0	0	0	0	0	0	0	0	0	0	0	0	0	0	0	0	0	0	0	0	0	0	0	0	0	0	0	0	0	0	0	0	0
470	Tropomodulin-3 OS=Homo sapiens GN=TMOD3 PE=1 SV=1	TMOD3_HUMAN	40	4.83	Homo Sapiens	0	0	0	0	0	0	0	0	0	0	0	0	0	0	0	0	0	0	0	0	0	0	0	0	0	0	0	0	0	0	0	0	0	0	0	0	0	0	0	0	0	0	0	0
471	Calpain small subunit 1 OS=Homo sapiens GN=CAPNS1 PE=1 SV=1	CPNS1_HUMAN	28	4.82	Homo Sapiens	0	0	0	0	0	0	0	0	0	0	0	0	0	0	0	0	0	0	0	0	0	0	0	0	0	0	0	0	0	0	0	0	0	0	0	0	0	0	0	0	0	0	0	0
472	Calpain-1 catalytic subunit OS=Homo sapiens GN=CAPN1 PE=1 SV=1	CAN1_HUMAN	82	5.35	Homo Sapiens	0	0	0	2	0	0	0	0	0	0	2	0	0	0	2	0	0	0	0.025	0	0	0	0	0	0	0.028	0	0	0	0.028	0	0	0	2	0	0	0	0	0	0	2	0	0	0
473	Collectin-10 OS=Homo sapiens GN=COLEC10 PE=2 SV=2	COL10_HUMAN	31	7.39	Homo Sapiens	0	0	0	0	0	0	0	0	0	0	0	0	0	0	0	0	0	0	0	0	0	0	0	0	0	0	0	0	0	0	0	0	0	0	0	0	0	0	0	0	0	0	0	0
474	Plasma serine protease inhibitor OS=Homo sapiens GN=SERPIN.A.5 PE=1 SV=3	IPSP_HUMAN	46	9.76	Homo Sapiens	0	0	0	0	0	0	0	0	0	0	0	0	0	0	0	0	0	0	0	0	0	0	0	0	0	0	0	0	0	0	0	0	0	0	0	0	0	0	0	0	0	0	0	0
475	Vitamin K-dependent protein C OS=Homo sapiens GN=PROC PE=1 SV=1	PROC_HUMAN	52	6.23	Homo Sapiens	0	0	0	0	0	0	0	0	0	2	0	0	0	0	2	0	0	0	0	0	0	0	0	0	0.069	0	0	0	0	0.069	0	0	0	0	0	0	0	0	0	2	0	0	0	0
476	Coagulation factor VII OS=Homo sapiens GN=F7 PE=1 SV=1	FA7_HUMAN	52	7.23	Homo Sapiens	0	0	0	0	0	0	0	0	0	0	0	0	0	0	0	0	0	0	0	0	0	0	0	0	0	0	0	0	0	0	0	0	0	0	0	0	0	0	0	0	0	0	0	0
477	Voltage-dependent anion-selective channel protein 1 OS=Homo sapiens GN=VDAC1 PE=1 SV=2	VDAC1_HUMAN	31	8.89	Homo Sapiens	0	0	0	0	0	0	0	0	0	0	0	2	0	0	0	0	0	0	0	0	0	0	0	0	0	0	0.078	0	0	0	0	0	0	0	0	0	0	0	0	0	0	2	0	0
478	Protein kiN.A.se C beta type OS=Homo sapiens GN=PRKCB PE=1 SV=4	KPCB_HUMAN	77	7	Homo Sapiens	0	0	0	0	0	0	0	0	0	0	0	3	2	0	0	0	0	0	0	0	0	0	0	0	0	0	0.043	0.025	0	0	0	0	0	0	0	0	0	0	0	0	0	3	2	0
479	Neutrophil elastase OS=Homo sapiens GN=ELANE PE=1 SV=1	ELNE_HUMAN	29	9.41	Homo Sapiens	0	0	0	0	0	0	0	0	0	0	0	0	0	0	0	0	0	0	0	0	0	0	0	0	0	0	0	0	0	0	0	0	0	0	0	0	0	0	0	0	0	0	0	0
480	CD44 antigen OS=Homo sapiens GN=CD44 PE=1 SV=3	CD44_HUMAN	82	5	Homo Sapiens	0	0	0	0	0	0	0	0	0	0	0	0	0	0	0	0	0	0	0	0	0	0	0	0	0	0	0	0	0	0	0	0	0	0	0	0	0	0	0	0	0	0	0	0
481	Annexin A3 OS=Homo sapiens GN=ANXA3 PE=1 SV=3	ANXA3_HUMAN	36	5.71	Homo Sapiens	0	0	0	0	0	0	0	0	0	0	0	0	0	0	0	0	0	0	0	0	0	0	0	0	0	0	0	0	0	0	0	0	0	0	0	0	0	0	0	0	0	0	0	0
482	Beta-1,4-galactosyltransferase 1 OS=Homo sapiens GN=B4GALT1 PE=1 SV=5	B4GT1_HUMAN	44	8.78	Homo Sapiens	0	0	0	0	0	0	0	0	0	0	0	0	0	0	0	0	0	0	0	0	0	0	0	0	0	0	0	0	0	0	0	0	0	0	0	0	0	0	0	0	0	0	0	0
483	Cornulin OS=Homo sapiens GN=CRNN PE=1 SV=1	CRNN_HUMAN	54	6.04	Homo Sapiens	0	0	0	0	0	0	0	0	0	0	0	3	0	0	3	0	0	0	0	0	0	0	0	0	0	0	0.12	0	0	0.087	0	0	0	0	0	0	0	0	0	0	0	2	0	0
484	C-C motif chemokine 5 OS=Homo sapiens GN=CCL5 PE=1 SV=3	CCL5_HUMAN	10	9.29	Homo Sapiens	2	0	0	0	0	0	0	0	0	0	0	0	0	0	0	0.26	0	0	0	0	0	0	0	0	0	0	0	0	0	0	2	0	0	0	0	0	0	0	0	0	0	0	0	0
485	Golgi-associated plant pathogenesis-related protein 1 OS=Homo sapiens GN=GLIPR2 PE=1 SV=3	GAPR1_HUMAN	17	9.92	Homo Sapiens	0	0	0	0	0	0	0	0	0	0	0	0	0	0	0	0	0	0	0	0	0	0	0	0	0	0	0	0	0	0	0	0	0	0	0	0	0	0	0	0	0	0	0	0
486	Complement C1r subcomponent-like protein OS=Homo sapiens GN=C1RL PE=1 SV=2	C1RL_HUMAN	53	7.2	Homo Sapiens	0	0	0	0	0	0	0	0	0	0	0	0	0	0	0	0	0	0	0	0	0	0	0	0	0	0	0	0	0	0	0	0	0	0	0	0	0	0	0	0	0	0	0	0
487	Disintegrin and metalloproteiN.A.se domain-containing protein 10 OS=Homo sapiens GN=ADAM10 PE=1 SV=1	ADA10_HUMAN	84	7.81	Homo Sapiens	0	0	0	0	0	0	0	0	0	0	0	4	0	0	0	0	0	0	0	0	0	0	0	0	0	0	0.094	0	0	0	0	0	0	0	0	0	0	0	0	0	0	3	0	0
488	Lipocalin-1 OS=Homo sapiens GN=LCN1 PE=1 SV=1	LCN1_HUMAN	19	5.3	Homo Sapiens	0	0	0	0	0	0	0	0	0	2	2	0	0	0	0	0	0	0	0	0	0	0	0	0	0.13	0.13	0	0	0	0	0	0	0	0	0	0	0	0	0	2	2	0	0	0
489	Cytochrome b-245 heavy chain OS=Homo sapiens GN=CYBB PE=1 SV=2	CY24B_HUMAN	65	8.76	Homo Sapiens	0	0	0	0	0	0	0	0	0	0	0	0	0	0	0	0	0	0	0	0	0	0	0	0	0	0	0	0	0	0	0	0	0	0	0	0	0	0	0	0	0	0	0	0
490	Ras-related protein Rab-8A OS=Homo sapiens GN=RAB8A PE=1 SV=1	RAB8A_HUMAN	24	9.54	Homo Sapiens	0	0	0	0	0	0	0	0	0	0	4	0	0	0	0	0	0	0	0	0	0	0	0	0	0	0.23	0	0	0	0	0	0	0	0	0	0	0	0	0	0	2	0	0	0
491	C-type lectin domain family 1 member B OS=Homo sapiens GN=CLEC1B PE=1 SV=2	CLC1B_HUMAN	27	8.62	Homo Sapiens	0	0	0	0	0	0	0	0	0	0	0	2	0	2	0	0	0	0	0	0	0	0	0	0	0	0	0.07	0	0.07	0	0	0	0	0	0	0	0	0	0	0	0	2	0	2
492	Rho-associated protein kiN.A.se 2 OS=Homo sapiens GN=ROCK2 PE=1 SV=4	ROCK2_HUMAN	161	5.84	Homo Sapiens	0	0	0	0	0	0	0	0	0	0	0	0	0	0	0	0	0	0	0	0	0	0	0	0	0	0	0	0	0	0	0	0	0	0	0	0	0	0	0	0	0	0	0	0
493	Periostin OS=Homo sapiens GN=POSTN PE=1 SV=2	POSTN_HUMAN	93	7.59	Homo Sapiens	0	0	0	0	0	0	0	0	0	0	0	0	0	0	0	0	0	0	0	0	0	0	0	0	0	0	0	0	0	0	0	0	0	0	0	0	0	0	0	0	0	0	0	0
494	Hemoglobin subunit gamma-1 OS=Homo sapiens GN=HBG1 PE=1 SV=2	HBG1_HUMAN	16	7.23	Homo Sapiens	0	0	0	0	0	0	0	0	0	0	0	0	0	0	0	0	0	0	0	0	0	0	0	0	0	0	0	0	0	0	0	0	0	0	0	0	0	0	0	0	0	0	0	0
495	Neurogranin OS=Homo sapiens GN=NRGN PE=1 SV=1	NEUG_HUMAN	8	8.06	Homo Sapiens	0	0	0	0	0	0	0	0	0	0	0	0	0	0	0	0	0	0	0	0	0	0	0	0	0	0	0	0	0	0	0	0	0	0	0	0	0	0	0	0	0	0	0	0
496	Gamma-glutamylcyclotransferase OS=Homo sapiens GN=GGCT PE=1 SV=1	GGCT_HUMAN	21	4.79	Homo Sapiens	0	0	0	0	0	0	0	0	0	0	0	0	0	0	0	0	0	0	0	0	0	0	0	0	0	0	0	0	0	0	0	0	0	0	0	0	0	0	0	0	0	0	0	0
497	Resistin OS=Homo sapiens GN=RETN PE=2 SV=1	RETN_HUMAN	11	6.89	Homo Sapiens	0	0	0	0	0	0	0	0	0	0	0	0	0	0	0	0	0	0	0	0	0	0	0	0	0	0	0	0	0	0	0	0	0	0	0	0	0	0	0	0	0	0	0	0
498	Tissue factor pathway inhibitor OS=Homo sapiens GN=TFPI PE=1 SV=1	TFPI1_HUMAN	35	8.31	Homo Sapiens	0	0	0	0	0	0	0	0	0	0	0	0	0	0	0	0	0	0	0	0	0	0	0	0	0	0	0	0	0	0	0	0	0	0	0	0	0	0	0	0	0	0	0	0
499	Kinesin-like protein KIF2A OS=Homo sapiens GN=KIF2A PE=1 SV=3	KIF2A_HUMAN	80	6.66	Homo Sapiens	0	0	0	0	0	0	0	0	0	0	0	0	0	0	0	0	0	0	0	0	0	0	0	0	0	0	0	0	0	0	0	0	0	0	0	0	0	0	0	0	0	0	0	0
500	Keratin, type I cuticular Ha6 OS=Homo sapiens GN=KRT36 PE=2 SV=1	KRT36_HUMAN	52	4.6	Homo Sapiens	0	0	0	0	0	0	0	0	0	0	0	0	0	0	0	0	0	0	0	0	0	0	0	0	0	0	0	0	0	0	0	0	0	0	0	0	0	0	0	0	0	0	0	0
501	Macrophage migration inhibitory factor OS=Homo sapiens GN=MIF PE=1 SV=4	MIF_HUMAN	12	8.05	Homo Sapiens	0	0	0	0	0	2	0	0	0	0	0	0	0	0	0	0	0	0	0	0	0.17	0	0	0	0	0	0	0	0	0	0	0	0	0	0	2	0	0	0	0	0	0	0	0
502	Thioredoxin-dependent peroxide reductase, mitochondrial OS=Homo sapiens GN=PRDX3 PE=1 SV=3	PRDX3_HUMAN	28	7.88	Homo Sapiens	0	0	0	0	0	2	0	0	0	0	0	0	0	2	0	0	0	0	0	0	0.18	0	0	0	0	0	0	0	0.082	0	0	0	0	0	0	2	0	0	0	0	0	0	0	2
503	Serpin B12 OS=Homo sapiens GN=SERPINB12 PE=1 SV=1	SPB12_HUMAN	46	5.22	Homo Sapiens	0	0	0	0	0	0	0	0	0	2	0	0	0	0	0	0	0	0	0	0	0	0	0	0	0.059	0	0	0	0	0	0	0	0	0	0	0	0	0	0	2	0	0	0	0
504	Dolichyl-diphosphooligosaccharide--protein glycosyltransferase 48 kDa subunit OS=Homo sapiens GN=DDOST PE=1 SV=4	OST48_HUMAN	51	6.52	Homo Sapiens	0	0	0	0	0	0	0	0	0	0	0	0	0	0	0	0	0	0	0	0	0	0	0	0	0	0	0	0	0	0	0	0	0	0	0	0	0	0	0	0	0	0	0	0
505	Purine nucleoside phosphorylase OS=Homo sapiens GN=PNP PE=1 SV=2	PNPH_HUMAN	32	6.95	Homo Sapiens	0	0	0	0	0	0	0	0	0	0	2	2	0	0	0	0	0	0	0	0	0	0	0	0	0	0.1	0.1	0	0	0	0	0	0	0	0	0	0	0	0	0	2	2	0	0
506	Olfactomedin-4 OS=Homo sapiens GN=OLFM4 PE=1 SV=1	OLFM4_HUMAN	57	5.37	Homo Sapiens	0	0	0	0	0	0	0	0	0	0	0	0	0	0	0	0	0	0	0	0	0	0	0	0	0	0	0	0	0	0	0	0	0	0	0	0	0	0	0	0	0	0	0	0
507	ATP synthase subunit gamma, mitochondrial OS=Homo sapiens GN=ATP5C1 PE=1 SV=1	ATPG_HUMAN	33	9.71	Homo Sapiens	0	0	0	0	0	0	0	0	0	0	0	0	3	0	0	0	0	0	0	0	0	0	0	0	0	0	0	0.074	0	0	0	0	0	0	0	0	0	0	0	0	0	0	2	0
508	Cathepsin G OS=Homo sapiens GN=CTSG PE=1 SV=2	CATG_HUMAN	29	11.69	Homo Sapiens	0	0	0	0	0	0	0	0	0	0	0	0	0	0	0	0	0	0	0	0	0	0	0	0	0	0	0	0	0	0	0	0	0	0	0	0	0	0	0	0	0	0	0	0
509	Ras-related protein Rab-5C OS=Homo sapiens GN=RAB5C PE=1 SV=2	RAB5C_HUMAN	23	8.61	Homo Sapiens	0	0	0	0	0	0	0	0	0	0	0	2	0	0	2	0	0	0	0	0	0	0	0	0	0	0	0.12	0	0	0.11	0	0	0	0	0	0	0	0	0	0	0	2	0	0
510	Guanine nucleotide-binding protein G(z) subunit alpha OS=Homo sapiens GN=GN.A.Z PE=2 SV=3	GN.A.Z_HUMAN	41	7.69	Homo Sapiens	0	0	0	0	0	0	0	0	0	2	0	2	0	2	4	0	0	0	0	0	0	0	0	0	0.065	0	0.065	0	0.065	0.11	0	0	0	0	0	0	0	0	0	2	0	2	0	2
511	Keratin, type I cuticular Ha5 OS=Homo sapiens GN=KRT35 PE=2 SV=5	KRT35_HUMAN	50	4.55	Homo Sapiens	0	0	0	0	0	0	0	0	0	0	0	0	0	0	0	0	0	0	0	0	0	0	0	0	0	0	0	0	0	0	0	0	0	0	0	0	0	0	0	0	0	0	0	0
512	Thioredoxin-related transmembrane protein 1 OS=Homo sapiens GN=TMX1 PE=1 SV=1	TMX1_HUMAN	32	4.63	Homo Sapiens	0	0	0	0	0	0	0	0	0	0	0	0	2	0	0	0	0	0	0	0	0	0	0	0	0	0	0	0.079	0	0	0	0	0	0	0	0	0	0	0	0	0	0	2	0
513	cAMP-dependent protein kiN.A.se type I-alpha regulatory subunit OS=Homo sapiens GN=PRKAR1A PE=1 SV=1	KAP0_HUMAN	43	5	Homo Sapiens	0	0	0	0	0	0	0	0	0	0	0	0	0	0	0	0	0	0	0	0	0	0	0	0	0	0	0	0	0	0	0	0	0	0	0	0	0	0	0	0	0	0	0	0
514	Flavin reductase (N.A.DPH) OS=Homo sapiens GN=BLVRB PE=1 SV=3	BLVRB_HUMAN	22	7.76	Homo Sapiens	0	0	0	0	0	0	0	0	0	0	0	0	0	0	0	0	0	0	0	0	0	0	0	0	0	0	0	0	0	0	0	0	0	0	0	0	0	0	0	0	0	0	0	0
515	Vimentin OS=Homo sapiens GN=VIM PE=1 SV=4	VIME_HUMAN	54	4.77	Homo Sapiens	0	0	0	3	2	0	0	0	0	0	0	0	0	0	0	0	0	0	0.075	0.06	0	0	0	0	0	0	0	0	0	0	0	0	0	2	2	0	0	0	0	0	0	0	0	0
516	Prohibitin OS=Homo sapiens GN=PHB PE=1 SV=1	PHB_HUMAN	30	5.46	Homo Sapiens	0	0	0	0	0	0	0	0	0	0	2	0	0	0	0	0	0	0	0	0	0	0	0	0	0	0.081	0	0	0	0	0	0	0	0	0	0	0	0	0	0	2	0	0	0
517	Protein S100-A6 OS=Homo sapiens GN=S100A6 PE=1 SV=1	S10A6_HUMAN	10	5.15	Homo Sapiens	0	0	0	0	0	0	0	0	0	2	3	0	0	0	0	0	0	0	0	0	0	0	0	0	0.28	0.28	0	0	0	0	0	0	0	0	0	0	0	0	0	2	2	0	0	0
518	Alpha-1,3-mannosyl-glycoprotein 2-beta-N-acetylglucosaminyltransferase OS=Homo sapiens GN=MGAT1 PE=1 SV=2	MGAT1_HUMAN	51	9.49	Homo Sapiens	0	0	0	0	0	0	0	0	0	0	0	0	0	0	0	0	0	0	0	0	0	0	0	0	0	0	0	0	0	0	0	0	0	0	0	0	0	0	0	0	0	0	0	0
519	Myosin-4 OS=Homo sapiens GN=MYH4 PE=1 SV=2	MYH4_HUMAN	223	5.61	Homo Sapiens	0	0	0	0	0	0	0	0	0	0	0	0	0	0	0	0	0	0	0	0	0	0	0	0	0	0	0	0	0	0	0	0	0	0	0	0	0	0	0	0	0	0	0	0
520	Protein-glutamine gamma-glutamyltransferase E OS=Homo sapiens GN=TGM3 PE=1 SV=4	TGM3_HUMAN	77	5.6	Homo Sapiens	0	0	0	0	0	0	0	0	0	3	2	0	0	0	0	0	0	0	0	0	0	0	0	0	0.043	0.027	0	0	0	0	0	0	0	0	0	0	0	0	0	3	2	0	0	0
521	SucciN.A.te dehydrogeN.A.se [ubiquinone] flavoprotein subunit, mitochondrial OS=Homo sapiens GN=SDHA PE=1 SV=2	DHSA_HUMAN	72	7.06	Homo Sapiens	0	0	0	0	0	0	0	0	0	0	0	0	0	2	0	0	0	0	0	0	0	0	0	0	0	0	0	0	0	0	0	0	0	0	0	0	0	0	0	0	0	0	0	2
522	Low affinity immunoglobulin gamma Fc region receptor III-A OS=Homo sapiens GN=FCGR3A PE=1 SV=2	FCG3A_HUMAN	29	8.21	Homo Sapiens	0	0	0	0	0	0	0	0	0	0	0	0	0	0	0	0	0	0	0	0	0	0	0	0	0	0	0	0	0	0	0	0	0	0	0	0	0	0	0	0	0	0	0	0
523	CKLF-like MARVEL transmembrane domain-containing protein 5 OS=Homo sapiens GN=CMTM5 PE=1 SV=2	CKLF5_HUMAN	25	6.62	Homo Sapiens	0	0	0	0	0	0	0	0	0	2	2	2	0	0	0	0	0	0	0	0	0	0	0	0	0.14	0.14	0.14	0	0	0	0	0	0	0	0	0	0	0	0	2	2	2	0	0
524	Dihydrolipoyl dehydrogeN.A.se, mitochondrial OS=Homo sapiens GN=DLD PE=1 SV=2	DLDH_HUMAN	54	7.95	Homo Sapiens	0	0	0	0	0	0	0	0	0	0	2	0	0	0	0	0	0	0	0	0	0	0	0	0	0	0.047	0	0	0	0	0	0	0	0	0	0	0	0	0	0	2	0	0	0
525	Endothelial cell-selective adhesion molecule OS=Homo sapiens GN=ESAM PE=1 SV=1	ESAM_HUMAN	41	9.75	Homo Sapiens	0	0	0	0	0	0	0	0	0	0	0	0	0	0	2	0	0	0	0	0	0	0	0	0	0	0	0	0	0	0.064	0	0	0	0	0	0	0	0	0	0	0	0	0	0
526	CD177 antigen OS=Homo sapiens GN=CD177 PE=1 SV=2	CD177_HUMAN	46	6.26	Homo Sapiens	0	0	0	0	0	0	0	0	0	0	0	0	0	0	0	0	0	0	0	0	0	0	0	0	0	0	0	0	0	0	0	0	0	0	0	0	0	0	0	0	0	0	0	0
527	Transforming growth factor beta-1-induced transcript 1 protein OS=Homo sapiens GN=TGFB1I1 PE=1 SV=2	TGFI1_HUMAN	50	7.03	Homo Sapiens	0	0	0	0	0	0	0	0	0	0	0	0	0	0	0	0	0	0	0	0	0	0	0	0	0	0	0	0	0	0	0	0	0	0	0	0	0	0	0	0	0	0	0	0
528	Ubiquitin-60S ribosomal protein L40 OS=Homo sapiens GN=UBA52 PE=1 SV=2	RL40_HUMAN	15	10.51	Homo Sapiens	0	0	0	0	0	0	0	0	0	0	0	0	0	0	0	0	0	0	0	0	0	0	0	0	0	0	0	0	0	0	0	0	0	0	0	0	0	0	0	0	0	0	0	0
529	L-selectin OS=Homo sapiens GN=SELL PE=1 SV=2	LYAM1_HUMAN	42	6.57	Homo Sapiens	0	0	0	0	0	0	0	0	0	0	0	0	0	0	0	0	0	0	0	0	0	0	0	0	0	0	0	0	0	0	0	0	0	0	0	0	0	0	0	0	0	0	0	0
530	Zymogen granule protein 16 homolog B OS=Homo sapiens GN=ZG16B PE=1 SV=3	ZG16B_HUMAN	23	7.63	Homo Sapiens	0	0	0	0	0	0	0	0	0	2	0	0	0	0	0	0	0	0	0	0	0	0	0	0	0.12	0	0	0	0	0	0	0	0	0	0	0	0	0	0	2	0	0	0	0
531	DehydrogeN.A.se/reductase SDR family member 7 OS=Homo sapiens GN=DHRS7 PE=1 SV=1	DHRS7_HUMAN	38	8.47	Homo Sapiens	0	0	0	0	0	0	0	0	0	2	0	0	0	0	0	0	0	0	0	0	0	0	0	0	0.062	0	0	0	0	0	0	0	0	0	0	0	0	0	0	2	0	0	0	0
532	Thrombospondin-4 OS=Homo sapiens GN=THBS4 PE=1 SV=2	TSP4_HUMAN	106	4.23	Homo Sapiens	0	0	0	0	0	0	0	0	0	0	0	0	0	0	0	0	0	0	0	0	0	0	0	0	0	0	0	0	0	0	0	0	0	0	0	0	0	0	0	0	0	0	0	0
533	Matrix Gla protein OS=Homo sapiens GN=MGP PE=1 SV=2	MGP_HUMAN	12	9.98	Homo Sapiens	0	0	0	0	0	0	0	0	0	2	0	0	0	0	0	0	0	0	0	0	0	0	0	0	0.23	0	0	0	0	0	0	0	0	0	0	0	0	0	0	2	0	0	0	0
534	Angiopoietin-related protein 3 OS=Homo sapiens GN=ANGPTL3 PE=1 SV=1	ANGL3_HUMAN	54	6.68	Homo Sapiens	0	0	0	0	0	0	0	0	0	0	0	0	0	0	0	0	0	0	0	0	0	0	0	0	0	0	0	0	0	0	0	0	0	0	0	0	0	0	0	0	0	0	0	0
535	Beta-adducin OS=Homo sapiens GN=ADD2 PE=1 SV=3	ADDB_HUMAN	81	5.73	Homo Sapiens	0	0	0	0	0	0	0	0	0	0	0	0	0	0	0	0	0	0	0	0	0	0	0	0	0	0	0	0	0	0	0	0	0	0	0	0	0	0	0	0	0	0	0	0
536	Serpin B3 OS=Homo sapiens GN=SERPINB3 PE=1 SV=2	SPB3_HUMAN	45	6.81	Homo Sapiens	0	0	0	0	0	0	0	0	0	2	0	0	0	0	0	0	0	0	0	0	0	0	0	0	0.056	0	0	0	0	0	0	0	0	0	0	0	0	0	0	2	0	0	0	0
537	Blood group Rh(CE) polypeptide OS=Homo sapiens GN=RHCE PE=1 SV=2	RHCE_HUMAN	46	9.71	Homo Sapiens	0	0	0	0	0	0	0	0	0	0	0	0	0	0	0	0	0	0	0	0	0	0	0	0	0	0	0	0	0	0	0	0	0	0	0	0	0	0	0	0	0	0	0	0
538	6-phosphoglucoN.A.te dehydrogeN.A.se, decarboxylating OS=Homo sapiens GN=PGD PE=1 SV=3	6PGD_HUMAN	53	7.25	Homo Sapiens	0	0	0	0	0	0	0	0	0	0	0	0	0	0	0	0	0	0	0	0	0	0	0	0	0	0	0	0	0	0	0	0	0	0	0	0	0	0	0	0	0	0	0	0
539	Dermokine OS=Homo sapiens GN=DMKN PE=1 SV=3	DMKN_HUMAN	47	7.32	Homo Sapiens	0	0	0	0	0	0	0	0	0	0	2	0	0	0	0	0	0	0	0	0	0	0	0	0	0	0.057	0	0	0	0	0	0	0	0	0	0	0	0	0	0	2	0	0	0
540	Biotinidase OS=Homo sapiens GN=BTD PE=1 SV=2	BTD_HUMAN	61	6.22	Homo Sapiens	0	0	0	0	0	0	0	0	0	0	0	0	0	0	0	0	0	0	0	0	0	0	0	0	0	0	0	0	0	0	0	0	0	0	0	0	0	0	0	0	0	0	0	0
541	TrifunctioN.A.l enzyme subunit alpha, mitochondrial OS=Homo sapiens GN=HADHA PE=1 SV=2	ECHA_HUMAN	83	9.52	Homo Sapiens	0	0	0	0	0	0	0	0	0	2	0	2	0	0	0	0	0	0	0	0	0	0	0	0	0.031	0	0.031	0	0	0	0	0	0	0	0	0	0	0	0	2	0	2	0	0
542	Glucose-6-phosphate 1-dehydrogeN.A.se OS=Homo sapiens GN=G6PD PE=1 SV=4	G6PD_HUMAN	59	6.84	Homo Sapiens	0	0	0	0	0	0	0	0	0	0	0	0	0	0	0	0	0	0	0	0	0	0	0	0	0	0	0	0	0	0	0	0	0	0	0	0	0	0	0	0	0	0	0	0
543	Dynein heavy chain 7, axonemal OS=Homo sapiens GN=DN.A.H7 PE=1 SV=2	DYH7_HUMAN	461	5.82	Homo Sapiens	0	0	0	0	0	0	0	0	0	0	0	0	0	0	0	0	0	0	0	0	0	0	0	0	0	0	0	0	0	0	0	0	0	0	0	0	0	0	0	0	0	0	0	0
544	Myotrophin OS=Homo sapiens GN=MTPN PE=1 SV=2	MTPN_HUMAN	13	5.18	Homo Sapiens	0	0	0	0	0	0	0	0	0	0	0	2	0	0	0	0	0	0	0	0	0	0	0	0	0	0	0.23	0	0	0	0	0	0	0	0	0	0	0	0	0	0	2	0	0
545	Dolichyl-diphosphooligosaccharide--protein glycosyltransferase subunit 2 OS=Homo sapiens GN=RPN2 PE=1 SV=3	RPN2_HUMAN	69	5.46	Homo Sapiens	0	0	0	0	0	0	0	0	0	0	2	0	0	0	0	0	0	0	0	0	0	0	0	0	0	0.059	0	0	0	0	0	0	0	0	0	0	0	0	0	0	2	0	0	0
546	Protein S100-A14 OS=Homo sapiens GN=S100A14 PE=1 SV=1	S10AE_HUMAN	12	4.93	Homo Sapiens	0	0	0	0	0	0	0	0	0	0	2	0	0	0	0	0	0	0	0	0	0	0	0	0	0	0.25	0	0	0	0	0	0	0	0	0	0	0	0	0	0	2	0	0	0
547	Myeloblastin OS=Homo sapiens GN=PRTN3 PE=1 SV=3	PRTN3_HUMAN	28	8.42	Homo Sapiens	0	0	0	0	0	0	0	0	0	0	0	0	0	0	0	0	0	0	0	0	0	0	0	0	0	0	0	0	0	0	0	0	0	0	0	0	0	0	0	0	0	0	0	0
548	Interleukin enhancer-binding factor 2 OS=Homo sapiens GN=ILF2 PE=1 SV=2	ILF2_HUMAN	43	4.93	Homo Sapiens	0	0	0	0	0	0	0	0	0	0	0	0	0	0	0	0	0	0	0	0	0	0	0	0	0	0	0	0	0	0	0	0	0	0	0	0	0	0	0	0	0	0	0	0
549	Aconitate hydratase, mitochondrial OS=Homo sapiens GN=ACO2 PE=1 SV=2	ACON_HUMAN	85	7.65	Homo Sapiens	0	0	0	0	0	0	0	0	0	0	2	0	0	0	0	0	0	0	0	0	0	0	0	0	0	0.04	0	0	0	0	0	0	0	0	0	0	0	0	0	0	2	0	0	0
550	Sodium/potassium-transporting ATPase subunit alpha-1 OS=Homo sapiens GN=ATP1A1 PE=1 SV=1	AT1A1_HUMAN	113	5.15	Homo Sapiens	0	0	0	0	0	0	0	0	0	0	0	0	0	0	0	0	0	0	0	0	0	0	0	0	0	0	0	0	0	0	0	0	0	0	0	0	0	0	0	0	0	0	0	0
551	PantetheiN.A.se OS=Homo sapiens GN=VNN1 PE=1 SV=2	VNN1_HUMAN	57	5.26	Homo Sapiens	0	0	0	0	0	0	0	0	0	0	0	0	0	0	0	0	0	0	0	0	0	0	0	0	0	0	0	0	0	0	0	0	0	0	0	0	0	0	0	0	0	0	0	0
552	Fibulin-5 OS=Homo sapiens GN=FBLN5 PE=1 SV=1	FBLN5_HUMAN	50	4.33	Homo Sapiens	0	0	0	0	0	0	0	0	0	0	0	0	0	0	0	0	0	0	0	0	0	0	0	0	0	0	0	0	0	0	0	0	0	0	0	0	0	0	0	0	0	0	0	0
553	Tight junction protein ZO-2 OS=Homo sapiens GN=TJP2 PE=1 SV=2	ZO2_HUMAN	134	7.43	Homo Sapiens	0	0	0	0	0	0	0	0	0	0	0	0	0	0	0	0	0	0	0	0	0	0	0	0	0	0	0	0	0	0	0	0	0	0	0	0	0	0	0	0	0	0	0	0
554	ArachidoN.A.te 12-lipoxygeN.A.se, 12S-type OS=Homo sapiens GN=ALOX12 PE=1 SV=4	LOX12_HUMAN	76	6.15	Homo Sapiens	0	0	0	0	0	0	0	0	0	0	2	0	0	0	2	0	0	0	0	0	0	0	0	0	0	0.038	0	0	0	0.038	0	0	0	0	0	0	0	0	0	0	2	0	0	0
555	ArgiN.A.se-1 OS=Homo sapiens GN=ARG1 PE=1 SV=2	ARGI1_HUMAN	35	7.25	Homo Sapiens	0	0	0	0	0	0	0	0	0	0	0	0	0	0	0	0	0	0	0	0	0	0	0	0	0	0	0	0	0	0	0	0	0	0	0	0	0	0	0	0	0	0	0	0
556	Inverted formin-2 OS=Homo sapiens GN=INF2 PE=1 SV=2	INF2_HUMAN	136	5.03	Homo Sapiens	0	0	0	0	0	0	0	0	0	0	0	0	0	0	0	0	0	0	0	0	0	0	0	0	0	0	0	0	0	0	0	0	0	0	0	0	0	0	0	0	0	0	0	0
557	Transketolase OS=Homo sapiens GN=TKT PE=1 SV=3	TKT_HUMAN	68	7.73	Homo Sapiens	0	0	0	2	0	2	0	0	0	0	0	0	0	0	0	0	0	0	0.05	0	0.05	0	0	0	0	0	0	0	0	0	0	0	0	2	0	2	0	0	0	0	0	0	0	0
558	MetalloproteiN.A.se inhibitor 3 OS=Homo sapiens GN=TIMP3 PE=1 SV=2	TIMP3_HUMAN	24	8.86	Homo Sapiens	0	0	0	0	0	0	0	0	0	0	0	0	0	0	0	0	0	0	0	0	0	0	0	0	0	0	0	0	0	0	0	0	0	0	0	0	0	0	0	0	0	0	0	0
559	Ras-related protein Rap-2b OS=Homo sapiens GN=RAP2B PE=1 SV=1	RAP2B_HUMAN	21	4.44	Homo Sapiens	0	0	0	0	0	0	0	0	0	0	2	0	0	0	0	0	0	0	0	0	0	0	0	0	0	0.11	0	0	0	0	0	0	0	0	0	0	0	0	0	0	2	0	0	0
560	Cornifin-A OS=Homo sapiens GN=SPRR1A PE=1 SV=2	SPR1A_HUMAN	10	8.6	Homo Sapiens	0	0	0	0	0	0	0	0	0	0	0	2	0	0	0	0	0	0	0	0	0	0	0	0	0	0	0.25	0	0	0	0	0	0	0	0	0	0	0	0	0	0	2	0	0
[truncated: 277 more columns]

## Sheet: RPA LCMS files
						CHOL_CTRL
						Spectral counts															Spectral counts / MW															RPA%
						CHOL_CTRL_1			CHOL_CTRL_2			CHOL_CTRL_3			CHOL_CTRL_4			CHOL_CTRL_5																		54.6707	52.4148	52.9719	73.3935	75.9374	76.6055	55.3201	52.3064	52.5221	105.279	105.161	97.2457	79.8589	86.3214
#	Identified Proteins (560)	Accession Number	Molecular Weight /kDa	pI	Taxonomy	2016-05-03_CHOL_PC_CTRL_A_01	2016-05-03_CHOL_PC_CTRL_A_02	2016-05-03_CHOL_PC_CTRL_A_03	2016-05-03_CHOL_PC_CTRL_B_01	2016-05-03_CHOL_PC_CTRL_B_02	2016-05-03_CHOL_PC_CTRL_B_03	2016-05-03_CHOL_PC_CTRL_C_01	2016-05-03_CHOL_PC_CTRL_C_02	2016-05-03_CHOL_PC_CTRL_C_03	2016-07-21_CHOLPC_CTRL_D_01	2016-07-21_CHOLPC_CTRL_D_02	2016-07-21_CHOLPC_CTRL_D_03	2016-07-21_CHOLPC_CTRL_E_01	2016-07-21_CHOLPC_CTRL_E_02	2016-07-21_CHOLPC_CTRL_E_03	2016-05-03_CHOL_PC_CTRL_A_01	2016-05-03_CHOL_PC_CTRL_A_02	2016-05-03_CHOL_PC_CTRL_A_03	2016-05-03_CHOL_PC_CTRL_B_01	2016-05-03_CHOL_PC_CTRL_B_02	2016-05-03_CHOL_PC_CTRL_B_03	2016-05-03_CHOL_PC_CTRL_C_01	2016-05-03_CHOL_PC_CTRL_C_02	2016-05-03_CHOL_PC_CTRL_C_03	2016-07-21_CHOLPC_CTRL_D_01	2016-07-21_CHOLPC_CTRL_D_02	2016-07-21_CHOLPC_CTRL_D_03	2016-07-21_CHOLPC_CTRL_E_01	2016-07-21_CHOLPC_CTRL_E_02	2016-07-21_CHOLPC_CTRL_E_03	2016-05-03_CHOL_PC_CTRL_A_01	2016-05-03_CHOL_PC_CTRL_A_02	2016-05-03_CHOL_PC_CTRL_A_03	2016-05-03_CHOL_PC_CTRL_B_01	2016-05-03_CHOL_PC_CTRL_B_02	2016-05-03_CHOL_PC_CTRL_B_03	2016-05-03_CHOL_PC_CTRL_C_01	2016-05-03_CHOL_PC_CTRL_C_02	2016-05-03_CHOL_PC_CTRL_C_03	2016-07-21_CHOLPC_CTRL_D_01	2016-07-21_CHOLPC_CTRL_D_02	2016-07-21_CHOLPC_CTRL_D_03	2016-07-21_CHOLPC_CTRL_E_01	2016-07-21_CHOLPC_CTRL_E_02
1	Apolipoprotein B-100 OS=Homo sapiens GN=APOB PE=1 SV=2	APOB_HUMAN	516	7.04	Homo Sapiens	81	79	79	79	86	81	66	80	78	391	382	339	272	307	297	0.156977	0.153101	0.153101	0.153101	0.166667	0.156977	0.127907	0.155039	0.151163	0.757752	0.74031	0.656977	0.527132	0.594961	0.575581	0.00287132	0.00292094	0.00289022	0.00208603	0.00219479	0.00204916	0.00231213	0.00296405	0.00287808	0.00719758	0.00703981	0.00675585	0.00660079	0.0068924
2	Serum albumin OS=Homo sapiens GN=ALB PE=1 SV=2	ALBU_HUMAN	69	6.21	Homo Sapiens	157	147	156	255	252	252	315	311	292	255	229	326	241	264	277	2.27536	2.13043	2.26087	3.69565	3.65217	3.65217	4.56522	4.50725	4.23188	3.69565	3.31884	4.72464	3.49275	3.82609	4.01449	0.0416194	0.0406456	0.0426805	0.0503539	0.0480945	0.0476751	0.0825237	0.0861701	0.0805733	0.0351035	0.0315597	0.0485846	0.0437366	0.0443237
3	Complement C3 OS=Homo sapiens GN=C3 PE=1 SV=2	CO3_HUMAN	187	6.34	Homo Sapiens	189	167	154	267	280	300	161	156	147	447	390	297	252	295	281	1.0107	0.893048	0.823529	1.42781	1.49733	1.60428	0.860963	0.834225	0.786096	2.39037	2.08556	1.58824	1.34759	1.57754	1.50267	0.018487	0.0170381	0.0155465	0.0194541	0.0197179	0.0209421	0.0155633	0.0159488	0.014967	0.0227052	0.0198322	0.0163322	0.0168747	0.0182752
4	Complement C4-B OS=Homo sapiens GN=C4B PE=1 SV=2	CO4B_HUMAN	193	7.28	Homo Sapiens	79	87	86	125	126	126	83	74	74	137	142	117	102	111	112	0.409326	0.450777	0.445596	0.647668	0.65285	0.65285	0.430052	0.38342	0.38342	0.709845	0.735751	0.606218	0.528497	0.57513	0.580311	0.00748713	0.00860018	0.00841192	0.0088246	0.00859721	0.00852223	0.00777388	0.00733027	0.00730015	0.00674253	0.00699646	0.00623388	0.00661789	0.00666265
5	Apolipoprotein A-I OS=Homo sapiens GN=APOA1 PE=1 SV=1	APOA1_HUMAN	31	5.5	Homo Sapiens	49	47	46	46	45	47	71	61	64	51	55	51	44	40	43	1.58065	1.51613	1.48387	1.48387	1.45161	1.51613	2.29032	1.96774	2.06452	1.64516	1.77419	1.64516	1.41935	1.29032	1.3871	0.0289121	0.0289256	0.0280124	0.020218	0.0191159	0.0197914	0.0414013	0.0376196	0.0393075	0.0156267	0.0168713	0.0169176	0.0177733	0.0149479
6	Keratin, type II cytoskeletal 1 OS=Homo sapiens GN=KRT1 PE=1 SV=6	K2C1_HUMAN	66	8.33	Homo Sapiens	71	82	76	96	98	101	81	75	68	180	163	104	97	103	116	1.07576	1.24242	1.15152	1.45455	1.48485	1.5303	1.22727	1.13636	1.0303	2.72727	2.4697	1.57576	1.4697	1.56061	1.75758	0.0196771	0.0237037	0.0217382	0.0198184	0.0195536	0.0199764	0.0221849	0.0217252	0.0196165	0.0259053	0.023485	0.0162039	0.0184037	0.018079
7	Alpha-2-macroglobulin OS=Homo sapiens GN=A2M PE=1 SV=3	A2MG_HUMAN	163	6.43	Homo Sapiens	12	11	11	24	20	31	32	32	33	63	58	75	53	60	63	0.0736196	0.0674847	0.0674847	0.147239	0.122699	0.190184	0.196319	0.196319	0.202454	0.386503	0.355828	0.460123	0.325153	0.368098	0.386503	0.0013466	0.00128751	0.00127397	0.00200616	0.0016158	0.00248264	0.00354878	0.00375325	0.00385464	0.00367124	0.00338367	0.00473155	0.0040716	0.00426427
8	Myosin-9 OS=Homo sapiens GN=MYH9 PE=1 SV=4	MYH9_HUMAN	227	5.29	Homo Sapiens	123	117	118	146	131	148	94	98	84	153	154	135	127	131	124	0.54185	0.515419	0.519824	0.643172	0.577093	0.651982	0.414097	0.431718	0.370044	0.674009	0.678414	0.594714	0.559471	0.577093	0.546256	0.00991117	0.00983345	0.00981319	0.00876333	0.00759958	0.00851091	0.00748547	0.00825364	0.00704549	0.00640214	0.00645122	0.00611558	0.00700575	0.00668539
9	Serotransferrin OS=Homo sapiens GN=TF PE=1 SV=3	TRFE_HUMAN	77	7.13	Homo Sapiens	30	34	31	43	48	43	67	67	66	45	46	57	46	58	55	0.38961	0.441558	0.402597	0.558442	0.623377	0.558442	0.87013	0.87013	0.857143	0.584416	0.597403	0.74026	0.597403	0.753247	0.714286	0.0071265	0.0084243	0.0076002	0.00760886	0.00820908	0.00728983	0.015729	0.0166353	0.0163197	0.00555113	0.00568086	0.00761227	0.00748073	0.00872607
10	Fibrinogen alpha chain OS=Homo sapiens GN=FGA PE=1 SV=2	FIBA_HUMAN	95	5.87	Homo Sapiens	124	120	115	120	121	126	115	109	116	99	89	94	74	83	85	1.30526	1.26316	1.21053	1.26316	1.27368	1.32632	1.21053	1.14737	1.22105	1.04211	0.936842	0.989474	0.778947	0.873684	0.894737	0.023875	0.0240992	0.0228522	0.0172107	0.0167728	0.0173136	0.0218822	0.0219355	0.0232483	0.00989854	0.00890868	0.010175	0.00975405	0.0101213
11	Apolipoprotein(a) OS=Homo sapiens GN=LPA PE=1 SV=1	APOA_HUMAN	501	5.77	Homo Sapiens	30	30	27	31	30	29	20	19	25	73	75	74	68	68	73	0.0598802	0.0598802	0.0538922	0.0618762	0.0598802	0.0578842	0.0399202	0.0379242	0.0499002	0.145709	0.149701	0.147705	0.135729	0.135729	0.145709	0.00109529	0.00114243	0.00101737	0.000843075	0.000788547	0.000755614	0.000721622	0.000725039	0.000950079	0.00138403	0.00142354	0.00151888	0.0016996	0.00157236
12	Apolipoprotein E OS=Homo sapiens GN=APOE PE=1 SV=1	APOE_HUMAN	36	5.42	Homo Sapiens	38	43	45	53	51	52	45	42	41	60	51	58	49	54	51	1.05556	1.19444	1.25	1.47222	1.41667	1.44444	1.25	1.16667	1.13889	1.66667	1.41667	1.61111	1.36111	1.5	1.41667	0.0193075	0.0227883	0.0235974	0.0200593	0.0186557	0.0188556	0.0225958	0.0223045	0.021684	0.015831	0.0134715	0.0165674	0.0170439	0.0173769
13	Fibrinogen beta chain OS=Homo sapiens GN=FGB PE=1 SV=2	FIBB_HUMAN	56	8.38	Homo Sapiens	82	87	84	116	121	115	90	85	78	111	109	105	80	96	86	1.46429	1.55357	1.5	2.07143	2.16071	2.05357	1.60714	1.51786	1.39286	1.98214	1.94643	1.875	1.42857	1.71429	1.53571	0.0267838	0.0296399	0.0283169	0.0282236	0.0284539	0.0268071	0.0290517	0.0290186	0.0265194	0.0188276	0.0185091	0.0192811	0.0178887	0.0198593
14	Filamin-A OS=Homo sapiens GN=FLNA PE=1 SV=4	FLNA_HUMAN	281	5.95	Homo Sapiens	56	67	63	82	84	92	38	33	43	93	103	88	79	79	89	0.199288	0.238434	0.224199	0.291815	0.298932	0.327402	0.135231	0.117438	0.153025	0.330961	0.366548	0.313167	0.281139	0.281139	0.316726	0.00364525	0.00454898	0.00423242	0.00397603	0.00393656	0.00427387	0.00244453	0.00224519	0.00291353	0.00314367	0.0034856	0.00322037	0.00352044	0.00325688
15	Keratin, type I cytoskeletal 9 OS=Homo sapiens GN=KRT9 PE=1 SV=3	K1C9_HUMAN	62	4.89	Homo Sapiens	71	64	65	74	72	69	69	64	69	128	126	70	56	69	64	1.14516	1.03226	1.04839	1.19355	1.16129	1.1129	1.1129	1.03226	1.1129	2.06452	2.03226	1.12903	0.903226	1.1129	1.03226	0.0209465	0.019694	0.0197914	0.0162623	0.0152927	0.0145277	0.0201175	0.0197348	0.0211892	0.01961	0.0193253	0.0116101	0.0113103	0.0128926
16	Alpha-1-antitrypsin OS=Homo sapiens GN=SERPINA1 PE=1 SV=3	A1AT_HUMAN	47	5.31	Homo Sapiens	15	15	16	28	27	25	32	33	29	38	35	44	34	36	41	0.319149	0.319149	0.340426	0.595745	0.574468	0.531915	0.680851	0.702128	0.617021	0.808511	0.744681	0.93617	0.723404	0.765957	0.87234	0.00583766	0.0060889	0.00642653	0.00811713	0.00756502	0.00694356	0.0123075	0.0134234	0.0117478	0.00767972	0.00708137	0.00962686	0.00905853	0.00887332
17	Haptoglobin OS=Homo sapiens GN=HP PE=1 SV=1	HPT_HUMAN	45	6.56	Homo Sapiens	17	15	16	21	20	19	30	27	28	34	29	34	30	34	31	0.377778	0.333333	0.355556	0.466667	0.444444	0.422222	0.666667	0.6	0.622222	0.755556	0.644444	0.755556	0.666667	0.755556	0.688889	0.00691006	0.00635952	0.00671215	0.00635842	0.00585277	0.00551164	0.0120511	0.0114709	0.0118469	0.00717672	0.00612819	0.00776956	0.00834806	0.00875282
18	Talin-1 OS=Homo sapiens GN=TLN1 PE=1 SV=3	TLN1_HUMAN	270	5.94	Homo Sapiens	72	69	70	79	72	81	46	52	50	89	95	76	67	76	69	0.266667	0.255556	0.259259	0.292593	0.266667	0.3	0.17037	0.192593	0.185185	0.32963	0.351852	0.281481	0.248148	0.281481	0.255556	0.00487769	0.00487563	0.00489428	0.00398663	0.00351166	0.00391617	0.00307972	0.00368201	0.00352585	0.00313102	0.00334585	0.00289454	0.00310733	0.00326085
19	Ig gamma-1 chain C region OS=Homo sapiens GN=IGHG1 PE=1 SV=1	IGHG1_HUMAN	36	8.31	Homo Sapiens	16	16	11	32	29	30	24	24	26	40	37	40	30	39	36	0.444444	0.444444	0.305556	0.888889	0.805556	0.833333	0.666667	0.666667	0.722222	1.11111	1.02778	1.11111	0.833333	1.08333	1	0.00812949	0.00847936	0.00576825	0.0121113	0.0106081	0.0108782	0.0120511	0.0127454	0.0137508	0.010554	0.00977341	0.0114258	0.0104351	0.01255
20	Complement factor H OS=Homo sapiens GN=CFH PE=1 SV=4	CFAH_HUMAN	139	6.59	Homo Sapiens	41	32	33	43	51	54	34	35	44	81	88	98	65	77	80	0.294964	0.230216	0.23741	0.309353	0.366906	0.388489	0.244604	0.251799	0.316547	0.582734	0.633094	0.705036	0.467626	0.553957	0.57554	0.00539529	0.00439219	0.00448181	0.00421498	0.00483169	0.00507129	0.00442162	0.00481392	0.00602692	0.00553516	0.00602026	0.00725005	0.00585565	0.00641738
21	Fibronectin OS=Homo sapiens GN=FN1 PE=1 SV=4	FINC_HUMAN	263	5.45	Homo Sapiens	19	15	15	24	29	26	14	12	13	66	63	57	51	57	55	0.0722433	0.0570342	0.0570342	0.0912548	0.110266	0.0988593	0.0532319	0.0456274	0.0494297	0.250951	0.239544	0.21673	0.193916	0.21673	0.209125	0.00132143	0.00108813	0.00107669	0.00124336	0.00145207	0.0012905	0.000962254	0.00087231	0.000941121	0.00238368	0.00227789	0.00222869	0.00242824	0.00251073
22	Fibrinogen gamma chain OS=Homo sapiens GN=FGG PE=1 SV=3	FIBG_HUMAN	52	5.32	Homo Sapiens	56	59	47	66	71	69	56	53	53	78	74	75	65	62	69	1.07692	1.13462	0.903846	1.26923	1.36538	1.32692	1.07692	1.01923	1.01923	1.5	1.42308	1.44231	1.25	1.19231	1.32692	0.0196984	0.0216468	0.0170627	0.0172935	0.0179804	0.0173215	0.0194671	0.0194858	0.0194057	0.0142479	0.0135324	0.0148316	0.0156526	0.0138124
23	C4b-binding protein alpha chain OS=Homo sapiens GN=C4BPA PE=1 SV=2	C4BPA_HUMAN	67	7.31	Homo Sapiens	28	32	28	71	68	63	34	32	37	60	62	64	49	56	54	0.41791	0.477612	0.41791	1.0597	1.01493	0.940299	0.507463	0.477612	0.552239	0.895522	0.925373	0.955224	0.731343	0.835821	0.80597	0.00764415	0.00911215	0.00788928	0.0144386	0.0133653	0.0122746	0.00917321	0.00913105	0.0105144	0.00850621	0.00879962	0.00982279	0.00915794	0.00968266
24	Ig mu chain C region OS=Homo sapiens GN=IGHM PE=1 SV=3	IGHM_HUMAN	49	6.77	Homo Sapiens	40	37	37	69	72	72	45	41	42	50	45	38	28	31	34	0.816327	0.755102	0.755102	1.40816	1.46939	1.46939	0.918367	0.836735	0.857143	1.02041	0.918367	0.77551	0.571429	0.632653	0.693878	0.0149317	0.0144063	0.0142548	0.0191865	0.01935	0.0191812	0.016601	0.0159968	0.0163197	0.00969245	0.008733	0.00797475	0.00715548	0.00732904
25	Apolipoprotein A-IV OS=Homo sapiens GN=APOA4 PE=1 SV=3	APOA4_HUMAN	45	5.05	Homo Sapiens	29	23	18	31	27	29	32	26	27	32	29	32	24	25	29	0.644444	0.511111	0.4	0.688889	0.6	0.644444	0.711111	0.577778	0.6	0.711111	0.644444	0.711111	0.533333	0.555556	0.644444	0.0117878	0.00975127	0.00755117	0.00938623	0.00790124	0.00841251	0.0128545	0.011046	0.0114238	0.00675456	0.00612819	0.00731252	0.00667845	0.0064359
26	Complement component C9 OS=Homo sapiens GN=C9 PE=1 SV=2	CO9_HUMAN	63	5.27	Homo Sapiens	31	35	27	43	38	44	22	23	26	37	47	40	37	35	36	0.492063	0.555556	0.428571	0.68254	0.603175	0.698413	0.349206	0.365079	0.412698	0.587302	0.746032	0.634921	0.587302	0.555556	0.571429	0.0090005	0.0105992	0.00809054	0.00929972	0.00794305	0.009117	0.00631247	0.00697964	0.00785761	0.00557854	0.00709421	0.00652904	0.00735424	0.0064359
27	Clusterin OS=Homo sapiens GN=CLU PE=1 SV=1	CLUS_HUMAN	52	6.21	Homo Sapiens	28	28	30	23	28	21	30	23	23	39	36	28	26	25	29	0.538462	0.538462	0.576923	0.442308	0.538462	0.403846	0.576923	0.442308	0.442308	0.75	0.692308	0.538462	0.5	0.480769	0.557692	0.00984919	0.0102731	0.0108911	0.00602652	0.00709086	0.00527176	0.0104288	0.0084561	0.00842136	0.00712395	0.00658334	0.00553713	0.00626104	0.00556953
28	Actin, cytoplasmic 1 OS=Homo sapiens GN=ACTB PE=1 SV=1	ACTB_HUMAN	42	5.15	Homo Sapiens	47	52	52	44	46	43	36	32	33	47	46	38	32	34	40	1.11905	1.2381	1.2381	1.04762	1.09524	1.02381	0.857143	0.761905	0.785714	1.11905	1.09524	0.904762	0.761905	0.809524	0.952381	0.0204689	0.0236211	0.0233727	0.014274	0.0144229	0.0133647	0.0154942	0.0145662	0.0149597	0.0106294	0.0104149	0.00930388	0.00954064	0.00937802
29	Keratin, type I cytoskeletal 10 OS=Homo sapiens GN=KRT10 PE=1 SV=6	K1C10_HUMAN	59	4.88	Homo Sapiens	20	21	19	32	35	34	16	19	20	75	83	47	49	57	48	0.338983	0.355932	0.322034	0.542373	0.59322	0.576271	0.271186	0.322034	0.338983	1.27119	1.40678	0.79661	0.830508	0.966102	0.813559	0.00620046	0.00679068	0.00607933	0.00738993	0.00781196	0.00752258	0.00490213	0.00615669	0.0064541	0.0120745	0.0133774	0.00819173	0.0103997	0.0111919
30	Keratin, type II cytoskeletal 2 epidermal OS=Homo sapiens GN=KRT2 PE=1 SV=2	K22E_HUMAN	65	8.17	Homo Sapiens	40	42	43	37	41	38	33	26	27	83	87	55	46	50	46	0.615385	0.646154	0.661538	0.569231	0.630769	0.584615	0.507692	0.4	0.415385	1.27692	1.33846	0.846154	0.707692	0.769231	0.707692	0.0112562	0.0123277	0.0124885	0.00775587	0.00830643	0.0076315	0.00917736	0.00764725	0.00790875	0.012129	0.0127278	0.0087012	0.00886178	0.00891124
31	Ig kappa chain C region OS=Homo sapiens GN=IGKC PE=1 SV=1	IGKC_HUMAN	12	5.68	Homo Sapiens	17	20	18	22	27	27	21	19	20	37	35	38	26	30	30	1.41667	1.66667	1.5	1.83333	2.25	2.25	1.75	1.58333	1.66667	3.08333	2.91667	3.16667	2.16667	2.5	2.5	0.0259127	0.0317976	0.0283169	0.0249795	0.0296297	0.0293712	0.0316341	0.0302704	0.0317327	0.0292874	0.0277354	0.0325636	0.0271312	0.0289615
32	Complement C5 OS=Homo sapiens GN=C5 PE=1 SV=4	CO5_HUMAN	188	6.49	Homo Sapiens	6	7	3	25	30	37	6	6	7	51	52	31	33	33	35	0.0319149	0.037234	0.0159574	0.132979	0.159574	0.196809	0.0319149	0.0319149	0.037234	0.271277	0.276596	0.164894	0.175532	0.175532	0.18617	0.000583766	0.000710372	0.000301243	0.00181186	0.00210139	0.00256912	0.000576913	0.000610153	0.000708921	0.00257675	0.00263022	0.00169564	0.00219803	0.00203347
33	Ig alpha-1 chain C region OS=Homo sapiens GN=IGHA1 PE=1 SV=2	IGHA1_HUMAN	38	6.49	Homo Sapiens	18	16	16	18	12	18	14	18	17	16	18	22	15	15	19	0.473684	0.421053	0.421053	0.473684	0.315789	0.473684	0.368421	0.473684	0.447368	0.421053	0.473684	0.578947	0.394737	0.394737	0.5	0.00866432	0.00803308	0.0079486	0.00645403	0.00415855	0.00618342	0.00665981	0.00905596	0.00851771	0.00399941	0.00450439	0.00595345	0.00494293	0.00457287
34	Thrombospondin-1 OS=Homo sapiens GN=THBS1 PE=1 SV=2	TSP1_HUMAN	129	4.51	Homo Sapiens	22	21	21	38	40	40	23	19	21	49	46	46	35	44	41	0.170543	0.162791	0.162791	0.294574	0.310078	0.310078	0.178295	0.147287	0.162791	0.379845	0.356589	0.356589	0.271318	0.341085	0.317829	0.00311945	0.00310581	0.00307315	0.00401362	0.00408333	0.00404772	0.00322296	0.00281585	0.00309947	0.003608	0.0033909	0.00366689	0.00339746	0.00395134
35	Plasminogen OS=Homo sapiens GN=PLG PE=1 SV=2	PLMN_HUMAN	91	7.25	Homo Sapiens	10	10	12	23	28	28	12	10	10	43	43	35	31	33	29	0.10989	0.10989	0.131868	0.252747	0.307692	0.307692	0.131868	0.10989	0.10989	0.472527	0.472527	0.384615	0.340659	0.362637	0.318681	0.00201004	0.00209655	0.0024894	0.00344373	0.00405192	0.00401658	0.00238373	0.00210089	0.00209226	0.00448835	0.00449339	0.00395509	0.00426577	0.00420101
36	Inter-alpha-trypsin inhibitor heavy chain H2 OS=Homo sapiens GN=ITIH2 PE=1 SV=2	ITIH2_HUMAN	106	6.85	Homo Sapiens	11	14	18	12	12	16	17	16	14	39	37	30	27	26	29	0.103774	0.132075	0.169811	0.113208	0.113208	0.150943	0.160377	0.150943	0.132075	0.367925	0.349057	0.283019	0.254717	0.245283	0.273585	0.00189816	0.00251981	0.00320568	0.00154247	0.0014908	0.0019704	0.00289908	0.00288576	0.00251466	0.00349477	0.00331927	0.00291035	0.00318959	0.00284151
37	von Willebrand factor OS=Homo sapiens GN=VWF PE=1 SV=4	VWF_HUMAN	309	5.15	Homo Sapiens	6	12	13	15	16	15	6	6	3	36	41	26	21	26	29	0.0194175	0.038835	0.0420712	0.0485437	0.0517799	0.0485437	0.0194175	0.0194175	0.00970874	0.116505	0.132686	0.0841424	0.0679612	0.0841424	0.0938511	0.000355172	0.000740915	0.000794217	0.000661416	0.000681876	0.000633684	0.000351002	0.000371226	0.00018485	0.00110663	0.00126175	0.000865256	0.000851015	0.000974757
38	Inter-alpha-trypsin inhibitor heavy chain H4 OS=Homo sapiens GN=ITIH4 PE=1 SV=4	ITIH4_HUMAN	103	6.97	Homo Sapiens	9	8	10	11	9	13	13	12	15	31	37	29	22	31	27	0.0873786	0.0776699	0.0970874	0.106796	0.0873786	0.126214	0.126214	0.116505	0.145631	0.300971	0.359223	0.281553	0.213592	0.300971	0.262136	0.00159827	0.00148183	0.00183281	0.00145512	0.00115067	0.00164758	0.00228152	0.00222736	0.00277276	0.0028588	0.00341595	0.00289528	0.00267462	0.00348663
39	Gelsolin OS=Homo sapiens GN=GSN PE=1 SV=1	GELS_HUMAN	86	6.19	Homo Sapiens	20	19	22	28	31	26	20	17	20	55	61	43	33	34	33	0.232558	0.22093	0.255814	0.325581	0.360465	0.302326	0.232558	0.197674	0.232558	0.639535	0.709302	0.5	0.383721	0.395349	0.383721	0.0042538	0.00421503	0.00482924	0.0044361	0.00474687	0.00394652	0.00420387	0.00377917	0.00442781	0.00607469	0.00674494	0.00514162	0.00480499	0.00457996
40	Ceruloplasmin OS=Homo sapiens GN=CP PE=1 SV=1	CERU_HUMAN	122	5.5	Homo Sapiens	2	2	0	9	8	9	9	12	12	18	19	20	14	14	16	0.0163934	0.0163934	0	0.0737705	0.0655738	0.0737705	0.0737705	0.0983607	0.0983607	0.147541	0.155738	0.163934	0.114754	0.114754	0.131148	0.000299858	0.000312763	0	0.00100514	0.000863524	0.000962992	0.00133352	0.00188047	0.00187275	0.00140143	0.00148095	0.00168578	0.00143696	0.00132938
41	Coagulation factor V OS=Homo sapiens GN=F5 PE=1 SV=4	FA5_HUMAN	252	5.95	Homo Sapiens	17	19	21	30	30	32	12	12	13	42	36	29	28	34	35	0.0674603	0.0753968	0.0833333	0.119048	0.119048	0.126984	0.047619	0.047619	0.0515873	0.166667	0.142857	0.115079	0.111111	0.134921	0.138889	0.00123394	0.00143846	0.00157316	0.00162204	0.00156771	0.00165764	0.000860792	0.000910387	0.000982201	0.0015831	0.00135847	0.00118339	0.00139134	0.001563
42	Vitamin D-binding protein OS=Homo sapiens GN=GC PE=1 SV=1	VTDB_HUMAN	53	5.21	Homo Sapiens	6	6	4	11	17	12	10	13	11	19	22	24	16	24	23	0.113208	0.113208	0.0754717	0.207547	0.320755	0.226415	0.188679	0.245283	0.207547	0.358491	0.415094	0.45283	0.301887	0.45283	0.433962	0.00207072	0.00215984	0.00142475	0.00282787	0.00422393	0.0029556	0.00341068	0.00468935	0.00395161	0.00340516	0.00394724	0.00465656	0.00378025	0.00524586
43	Prothrombin OS=Homo sapiens GN=F2 PE=1 SV=2	THRB_HUMAN	70	5.7	Homo Sapiens	5	4	6	8	13	10	7	6	7	26	29	27	28	24	23	0.0714286	0.0571429	0.0857143	0.114286	0.185714	0.142857	0.1	0.0857143	0.1	0.371429	0.414286	0.385714	0.4	0.342857	0.328571	0.00130652	0.0010902	0.00161811	0.00155716	0.00244562	0.00186484	0.00180766	0.0016387	0.00190396	0.00352805	0.00393955	0.00396639	0.00500883	0.00397187
44	Lipopolysaccharide-binding protein OS=Homo sapiens GN=LBP PE=1 SV=3	LBP_HUMAN	53	6.68	Homo Sapiens	13	15	14	13	16	11	9	9	10	24	25	18	18	22	19	0.245283	0.283019	0.264151	0.245283	0.301887	0.207547	0.169811	0.169811	0.188679	0.45283	0.471698	0.339623	0.339623	0.415094	0.358491	0.00448656	0.00539959	0.00498662	0.00334202	0.00397547	0.0027093	0.00306962	0.00324648	0.00359238	0.00430125	0.0044855	0.00349242	0.00425278	0.00480871
45	Keratin, type I cytoskeletal 16 OS=Homo sapiens GN=KRT16 PE=1 SV=4	K1C16_HUMAN	51	4.69	Homo Sapiens	20	20	21	29	35	31	20	14	15	51	52	48	40	46	50	0.392157	0.392157	0.411765	0.568627	0.686275	0.607843	0.392157	0.27451	0.294118	1	1.01961	0.941176	0.784314	0.901961	0.980392	0.00717308	0.00748179	0.00777326	0.00774765	0.00903737	0.00793472	0.00708887	0.00524812	0.00559988	0.0094986	0.00969572	0.00967834	0.00982124	0.0104489
46	Serum amyloid A-2 protein OS=Homo sapiens GN=SAA2 PE=1 SV=1	SAA2_HUMAN	14	9.48	Homo Sapiens	0	0	0	0	0	0	0	0	0	3	2	3	3	2	4	0	0	0	0	0	0	0	0	0	0.214286	0.142857	0.214286	0.214286	0.142857	0.285714	0	0	0	0	0	0	0	0	0	0.00203541	0.00135847	0.00220355	0.0026833	0.00165494
47	Apolipoprotein C-III OS=Homo sapiens GN=APOC3 PE=1 SV=1	APOC3_HUMAN	11	5.04	Homo Sapiens	25	27	24	23	28	25	26	31	26	26	25	22	17	21	17	2.27273	2.45455	2.18182	2.09091	2.54545	2.27273	2.36364	2.81818	2.36364	2.36364	2.27273	2	1.54545	1.90909	1.54545	0.0415712	0.0468292	0.0411882	0.028489	0.0335204	0.0296679	0.0427266	0.0538784	0.0450027	0.0224512	0.021612	0.0205665	0.0193523	0.0221161
48	Integrin alpha-IIb OS=Homo sapiens GN=ITGA2B PE=1 SV=3	ITA2B_HUMAN	113	5.03	Homo Sapiens	24	25	23	32	30	33	20	21	20	43	45	44	39	41	40	0.212389	0.221239	0.20354	0.283186	0.265487	0.292035	0.176991	0.185841	0.176991	0.380531	0.39823	0.389381	0.345133	0.362832	0.353982	0.00388489	0.00422092	0.00384241	0.00385846	0.00349612	0.0038122	0.0031994	0.00355293	0.00336984	0.00361451	0.00378688	0.00400409	0.00432178	0.00420327
49	Integrin beta-3 OS=Homo sapiens GN=ITGB3 PE=1 SV=2	ITB3_HUMAN	87	4.85	Homo Sapiens	21	18	21	33	33	29	20	14	19	38	48	40	33	35	37	0.241379	0.206897	0.241379	0.37931	0.37931	0.333333	0.229885	0.16092	0.218391	0.436782	0.551724	0.45977	0.37931	0.402299	0.425287	0.00441515	0.00394729	0.00455674	0.00516817	0.00499504	0.0043513	0.00415555	0.00307648	0.00415807	0.00414881	0.00524649	0.00472792	0.00474976	0.00466048
50	Ig gamma-3 chain C region OS=Homo sapiens GN=IGHG3 PE=1 SV=2	IGHG3_HUMAN	41	7.95	Homo Sapiens	18	19	15	34	38	40	34	28	28	33	26	33	27	31	31	0.439024	0.463415	0.365854	0.829268	0.926829	0.97561	0.829268	0.682927	0.682927	0.804878	0.634146	0.804878	0.658537	0.756098	0.756098	0.00803035	0.00884129	0.00690656	0.0112989	0.0122052	0.0127355	0.0149904	0.0130563	0.0130026	0.00764522	0.00603027	0.00827675	0.00824625	0.0087591
51	Kininogen-1 OS=Homo sapiens GN=KNG1 PE=1 SV=2	KNG1_HUMAN	72	6.8	Homo Sapiens	14	15	13	23	20	22	14	16	18	15	21	18	14	16	17	0.194444	0.208333	0.180556	0.319444	0.277778	0.305556	0.194444	0.222222	0.25	0.208333	0.291667	0.25	0.194444	0.222222	0.236111	0.00355665	0.0039747	0.00340851	0.00435249	0.00365798	0.00398869	0.0035149	0.00424847	0.0047599	0.00197888	0.00277354	0.00257081	0.00243485	0.00257436
52	Ig lambda-2 chain C regions OS=Homo sapiens GN=IGLC2 PE=1 SV=1	LAC2_HUMAN	11	7.34	Homo Sapiens	12	13	12	19	19	14	20	15	15	12	13	15	11	12	15	1.09091	1.18182	1.09091	1.72727	1.72727	1.27273	1.81818	1.36364	1.36364	1.09091	1.18182	1.36364	1	1.09091	1.36364	0.0199542	0.0225474	0.0205941	0.0235344	0.022746	0.016614	0.0328666	0.0260702	0.0259631	0.0103621	0.0112382	0.0140226	0.0125221	0.0126378
53	Hornerin OS=Homo sapiens GN=HRNR PE=1 SV=2	HORN_HUMAN	282	10.24	Homo Sapiens	32	30	26	24	23	28	34	29	31	49	40	24	12	17	21	0.113475	0.106383	0.0921986	0.0851064	0.0815603	0.0992908	0.120567	0.102837	0.109929	0.173759	0.141844	0.0851064	0.0425532	0.0602837	0.0744681	0.00207561	0.00202963	0.00174052	0.00115959	0.00107405	0.00129613	0.00217945	0.00196605	0.002093	0.00165047	0.00134883	0.000875169	0.000532855	0.000698363
54	Apolipoprotein A-II OS=Homo sapiens GN=APOA2 PE=1 SV=1	APOA2_HUMAN	11	6.6	Homo Sapiens	14	16	16	15	13	14	14	14	13	19	17	14	12	14	12	1.27273	1.45455	1.45455	1.36364	1.18182	1.27273	1.27273	1.27273	1.18182	1.72727	1.54545	1.27273	1.09091	1.27273	1.09091	0.0232799	0.0277506	0.0274588	0.0185798	0.0155631	0.016614	0.0230066	0.0243322	0.0225013	0.0164067	0.0146961	0.0130878	0.0136605	0.0147441
55	Vitronectin OS=Homo sapiens GN=VTN PE=1 SV=1	VTNC_HUMAN	54	5.54	Homo Sapiens	9	9	9	14	12	11	10	7	12	18	14	11	13	10	15	0.166667	0.166667	0.166667	0.259259	0.222222	0.203704	0.185185	0.12963	0.222222	0.333333	0.259259	0.203704	0.240741	0.185185	0.277778	0.00304856	0.00317976	0.00314632	0.00353245	0.00292639	0.00265913	0.00334752	0.00247828	0.00423102	0.0031662	0.00246537	0.00209473	0.00301458	0.0021453
56	Apolipoprotein D OS=Homo sapiens GN=APOD PE=1 SV=1	APOD_HUMAN	21	4.79	Homo Sapiens	7	8	6	5	4	4	9	8	8	14	12	16	13	13	13	0.333333	0.380952	0.285714	0.238095	0.190476	0.190476	0.428571	0.380952	0.380952	0.666667	0.571429	0.761905	0.619048	0.619048	0.619048	0.00609712	0.00726803	0.00539369	0.00324409	0.00250833	0.00248645	0.00774712	0.0072831	0.00725318	0.0063324	0.00543387	0.00783485	0.00775177	0.00717143
57	Inter-alpha-trypsin inhibitor heavy chain H1 OS=Homo sapiens GN=ITIH1 PE=1 SV=3	ITIH1_HUMAN	101	6.78	Homo Sapiens	4	6	4	10	8	8	6	4	6	38	34	26	22	27	26	0.039604	0.0594059	0.039604	0.0990099	0.0792079	0.0792079	0.0594059	0.039604	0.0594059	0.376238	0.336634	0.257426	0.217822	0.267327	0.257426	0.00072441	0.00113338	0.00074764	0.00134903	0.00104307	0.00103397	0.00107386	0.000757154	0.00113106	0.00357373	0.00320114	0.00264717	0.00272758	0.00309688
58	Complement factor B OS=Homo sapiens GN=CFB PE=1 SV=2	CFAB_HUMAN	86	7.07	Homo Sapiens	8	5	4	7	6	10	8	10	10	14	14	15	13	15	16	0.0930233	0.0581395	0.0465116	0.0813953	0.0697674	0.116279	0.0930233	0.116279	0.116279	0.162791	0.162791	0.174419	0.151163	0.174419	0.186047	0.00170152	0.00110922	0.000878043	0.00110903	0.000918749	0.00151789	0.00168155	0.00222304	0.00221391	0.00154628	0.00154802	0.00179359	0.00189287	0.00202057
59	Hemopexin OS=Homo sapiens GN=HPX PE=1 SV=2	HEMO_HUMAN	52	7.02	Homo Sapiens	6	4	6	6	6	8	15	13	15	11	12	15	12	13	13	0.115385	0.0769231	0.115385	0.115385	0.115385	0.153846	0.288462	0.25	0.288462	0.211538	0.230769	0.288462	0.230769	0.25	0.25	0.00211054	0.00146758	0.00217822	0.00157214	0.00151947	0.00200829	0.00521441	0.00477953	0.00549219	0.00200932	0.00219445	0.00296632	0.00288971	0.00289615
60	Ig gamma-2 chain C region OS=Homo sapiens GN=IGHG2 PE=1 SV=2	IGHG2_HUMAN	36	7.66	Homo Sapiens	16	15	16	41	45	43	34	25	25	27	26	38	30	33	32	0.444444	0.416667	0.444444	1.13889	1.25	1.19444	0.944444	0.694444	0.694444	0.75	0.722222	1.05556	0.833333	0.916667	0.888889	0.00812949	0.0079494	0.00839019	0.0155176	0.0164609	0.0155921	0.0170724	0.0132765	0.0132219	0.00712395	0.0068678	0.0108545	0.0104351	0.0106192
61	Beta-2-glycoprotein 1 OS=Homo sapiens GN=APOH PE=1 SV=3	APOH_HUMAN	38	8.03	Homo Sapiens	10	12	16	11	14	14	8	6	8	16	15	19	12	12	14	0.263158	0.315789	0.421053	0.289474	0.368421	0.368421	0.210526	0.157895	0.210526	0.421053	0.394737	0.5	0.315789	0.315789	0.368421	0.00481351	0.00602481	0.0079486	0.00394413	0.00485164	0.00480933	0.0038056	0.00301865	0.00400834	0.00399941	0.00375366	0.00514162	0.00395434	0.0036583
62	Histidine-rich glycoprotein OS=Homo sapiens GN=HRG PE=1 SV=1	HRG_HUMAN	60	7.52	Homo Sapiens	14	10	10	25	22	22	13	9	13	40	33	35	32	32	36	0.233333	0.166667	0.166667	0.416667	0.366667	0.366667	0.216667	0.15	0.216667	0.666667	0.55	0.583333	0.533333	0.533333	0.6	0.00426798	0.00317976	0.00314632	0.00567716	0.00482854	0.00478643	0.0039166	0.00286772	0.00412524	0.0063324	0.0052301	0.00599855	0.00667845	0.00617846
63	Alpha-2-HS-glycoprotein OS=Homo sapiens GN=AHSG PE=1 SV=1	FETUA_HUMAN	39	5.52	Homo Sapiens	18	18	16	23	20	19	21	21	20	20	21	20	15	18	19	0.461538	0.461538	0.410256	0.589744	0.512821	0.487179	0.538462	0.538462	0.512821	0.512821	0.538462	0.512821	0.384615	0.461538	0.487179	0.00844216	0.00880549	0.00774479	0.00803536	0.0067532	0.00635959	0.00973357	0.0102944	0.00976389	0.00487108	0.00512037	0.00527345	0.00481619	0.00534674
64	Apolipoprotein L1 OS=Homo sapiens GN=APOL1 PE=1 SV=5	APOL1_HUMAN	44	5.55	Homo Sapiens	3	4	4	7	7	6	6	4	3	11	9	6	4	9	8	0.0681818	0.0909091	0.0909091	0.159091	0.159091	0.136364	0.136364	0.0909091	0.0681818	0.25	0.204545	0.136364	0.0909091	0.204545	0.181818	0.00124714	0.00173442	0.00171617	0.00216764	0.00209503	0.00178008	0.00246499	0.00173801	0.00129815	0.00237465	0.00194508	0.00140226	0.00113837	0.00236958
65	Heparin cofactor 2 OS=Homo sapiens GN=SERPIND1 PE=1 SV=3	HEP2_HUMAN	57	6.89	Homo Sapiens	12	9	12	8	10	8	8	12	9	34	32	28	26	28	25	0.210526	0.157895	0.210526	0.140351	0.175439	0.140351	0.140351	0.210526	0.157895	0.596491	0.561404	0.491228	0.45614	0.491228	0.438596	0.00385081	0.00301241	0.0039743	0.00191231	0.0023103	0.00183212	0.00253707	0.00402487	0.00300625	0.00566583	0.00533854	0.00505141	0.00571183	0.00569069
66	Keratin, type II cytoskeletal 6C OS=Homo sapiens GN=KRT6C PE=1 SV=3	K2C6C_HUMAN	60	8.16	Homo Sapiens	19	18	20	24	20	23	15	17	17	48	46	39	42	42	41	0.316667	0.3	0.333333	0.4	0.333333	0.383333	0.25	0.283333	0.283333	0.8	0.766667	0.65	0.7	0.7	0.683333	0.00579226	0.00572357	0.00629264	0.00545007	0.00438958	0.00500399	0.00451916	0.0054168	0.00539455	0.00759888	0.00729044	0.0066841	0.00876546	0.00810923
67	Serum paraoxonase/arylesterase 1 OS=Homo sapiens GN=PON1 PE=1 SV=3	PON1_HUMAN	40	4.89	Homo Sapiens	8	9	5	6	4	6	5	6	6	15	15	11	11	10	10	0.2	0.225	0.125	0.15	0.1	0.15	0.125	0.15	0.15	0.375	0.375	0.275	0.275	0.25	0.25	0.00365827	0.00429268	0.00235974	0.00204378	0.00131687	0.00195808	0.00225958	0.00286772	0.00285594	0.00356198	0.00356598	0.00282789	0.00344357	0.00289615
68	Complement component C6 OS=Homo sapiens GN=C6 PE=1 SV=3	CO6_HUMAN	105	6.74	Homo Sapiens	13	9	14	22	17	19	12	12	11	30	24	25	22	25	24	0.12381	0.0857143	0.133333	0.209524	0.161905	0.180952	0.114286	0.114286	0.104762	0.285714	0.228571	0.238095	0.209524	0.238095	0.228571	0.00226464	0.00163531	0.00251706	0.0028548	0.00213208	0.00236213	0.0020659	0.00218493	0.00199462	0.00271389	0.00217355	0.00244839	0.00262367	0.00275824
69	Hemoglobin subunit beta OS=Homo sapiens GN=HBB PE=1 SV=2	HBB_HUMAN	16	7.32	Homo Sapiens	16	9	15	15	14	15	13	13	13	11	15	13	12	14	15	1	0.5625	0.9375	0.9375	0.875	0.9375	0.8125	0.8125	0.8125	0.6875	0.9375	0.8125	0.75	0.875	0.9375	0.0182913	0.0107317	0.0176981	0.0127736	0.0115226	0.012238	0.0146873	0.0155335	0.0154697	0.00653029	0.00891494	0.00835513	0.00939156	0.0101365
70	Complement C1r subcomponent OS=Homo sapiens GN=C1R PE=1 SV=2	C1R_HUMAN	80	6.14	Homo Sapiens	6	4	3	9	6	8	3	6	4	13	14	13	10	8	11	0.075	0.05	0.0375	0.1125	0.075	0.1	0.0375	0.075	0.05	0.1625	0.175	0.1625	0.125	0.1	0.1375	0.00137185	0.000953928	0.000707922	0.00153283	0.000987655	0.00130539	0.000677873	0.00143386	0.00095198	0.00154352	0.00166412	0.00167103	0.00156526	0.00115846
71	Spectrin alpha chain, erythrocytic 1 OS=Homo sapiens GN=SPTA1 PE=1 SV=5	SPTA1_HUMAN	280	4.69	Homo Sapiens	0	2	0	0	0	2	0	0	0	9	14	10	6	12	9	0	0.00714286	0	0	0	0.00714286	0	0	0	0.0321429	0.05	0.0357143	0.0214286	0.0428571	0.0321429	0	0.000136275	0	0	0	9.32421e-05	0	0	0	0.000305312	0.000475463	0.000367258	0.00026833	0.000496483
72	Alpha-1-antichymotrypsin OS=Homo sapiens GN=SERPINA3 PE=1 SV=2	AACT_HUMAN	48	5.19	Homo Sapiens	6	4	0	3	4	6	7	8	5	9	14	17	10	9	11	0.125	0.0833333	0	0.0625	0.0833333	0.125	0.145833	0.166667	0.104167	0.1875	0.291667	0.354167	0.208333	0.1875	0.229167	0.00228642	0.00158988	0	0.000851574	0.00109739	0.00163174	0.00263617	0.00318636	0.00198329	0.00178099	0.00277354	0.00364198	0.00260877	0.00217211
73	Vitamin K-dependent protein S OS=Homo sapiens GN=PROS1 PE=1 SV=1	PROS_HUMAN	75	5.37	Homo Sapiens	7	7	8	15	14	19	9	4	11	22	24	15	13	17	16	0.0933333	0.0933333	0.106667	0.2	0.186667	0.253333	0.12	0.0533333	0.146667	0.293333	0.32	0.2	0.173333	0.226667	0.213333	0.00170719	0.00178067	0.00201364	0.00272504	0.00245816	0.00330699	0.00216919	0.00101963	0.00279247	0.00278626	0.00304297	0.00205665	0.00217049	0.00262585
74	Band 3 anion transport protein OS=Homo sapiens GN=SLC4A1 PE=1 SV=3	B3AT_HUMAN	102	4.84	Homo Sapiens	4	3	5	11	7	11	4	4	5	17	17	14	13	15	14	0.0392157	0.0294118	0.0490196	0.107843	0.0686275	0.107843	0.0392157	0.0392157	0.0490196	0.166667	0.166667	0.137255	0.127451	0.147059	0.137255	0.000717308	0.000561134	0.000925388	0.00146938	0.000903737	0.00140777	0.000708887	0.000749731	0.000933313	0.0015831	0.00158488	0.00141142	0.00159595	0.00170362
75	Serum amyloid A-4 protein OS=Homo sapiens GN=SAA4 PE=1 SV=2	SAA4_HUMAN	15	9.38	Homo Sapiens	5	5	6	2	3	4	3	3	6	10	5	5	9	4	4	0.333333	0.333333	0.4	0.133333	0.2	0.266667	0.2	0.2	0.4	0.666667	0.333333	0.333333	0.6	0.266667	0.266667	0.00609712	0.00635952	0.00755117	0.00181669	0.00263375	0.00348104	0.00361532	0.00382363	0.00761584	0.0063324	0.00316976	0.00342775	0.00751325	0.00308923
76	Complement component C8 beta chain OS=Homo sapiens GN=C8B PE=1 SV=3	CO8B_HUMAN	67	8.17	Homo Sapiens	6	4	5	12	13	12	4	2	3	29	31	23	19	24	19	0.0895522	0.0597015	0.0746269	0.179104	0.19403	0.179104	0.0597015	0.0298507	0.0447761	0.432836	0.462687	0.343284	0.283582	0.358209	0.283582	0.00163803	0.00113902	0.0014088	0.00244033	0.00255513	0.00233801	0.0010792	0.000570691	0.000852519	0.00411133	0.00439981	0.00353007	0.00355104	0.00414971
77	Hemoglobin subunit alpha OS=Homo sapiens GN=HBA1 PE=1 SV=2	HBA_HUMAN	15	9.09	Homo Sapiens	12	9	11	12	14	11	7	8	7	9	13	12	9	5	13	0.8	0.6	0.733333	0.8	0.933333	0.733333	0.466667	0.533333	0.466667	0.6	0.866667	0.8	0.6	0.333333	0.866667	0.0146331	0.0114471	0.0138438	0.0109001	0.0122908	0.00957285	0.00843576	0.0101963	0.00888514	0.00569916	0.00824136	0.00822659	0.00751325	0.00386154
78	Vinculin OS=Homo sapiens GN=VCL PE=1 SV=4	VINC_HUMAN	124	5.33	Homo Sapiens	12	12	12	26	33	30	7	9	9	32	30	31	28	26	32	0.0967742	0.0967742	0.0967742	0.209677	0.266129	0.241935	0.0564516	0.0725806	0.0725806	0.258065	0.241935	0.25	0.225806	0.209677	0.258065	0.00177013	0.00184631	0.0018269	0.00285689	0.00350458	0.0031582	0.00102045	0.00138761	0.00138191	0.00245125	0.00230063	0.00257081	0.00282757	0.00242903
79	Alpha-1-acid glycoprotein 1 OS=Homo sapiens GN=ORM1 PE=1 SV=1	A1AG1_HUMAN	24	4.66	Homo Sapiens	6	6	3	6	7	7	8	5	9	8	11	9	7	7	9	0.25	0.25	0.125	0.25	0.291667	0.291667	0.333333	0.208333	0.375	0.333333	0.458333	0.375	0.291667	0.291667	0.375	0.00457284	0.00476964	0.00235974	0.00340629	0.00384088	0.00380738	0.00602554	0.00398294	0.00713985	0.0031662	0.00435841	0.00385621	0.00365227	0.00337885
80	Spectrin beta chain, erythrocytic OS=Homo sapiens GN=SPTB PE=1 SV=5	SPTB1_HUMAN	246	4.92	Homo Sapiens	3	3	3	2	2	2	0	0	0	7	8	6	5	5	6	0.0121951	0.0121951	0.0121951	0.00813008	0.00813008	0.00813008	0	0	0	0.0284553	0.0325203	0.0243902	0.0203252	0.0203252	0.0243902	0.000223065	0.000232665	0.000230219	0.000110774	0.000107063	0.000106129	0	0	0	0.000270285	0.000309244	0.000250811	0.000254514	0.00023546
81	Multimerin-1 OS=Homo sapiens GN=MMRN1 PE=1 SV=3	MMRN1_HUMAN	138	8.01	Homo Sapiens	10	10	10	12	12	12	8	7	6	19	19	15	16	16	16	0.0724638	0.0724638	0.0724638	0.0869565	0.0869565	0.0869565	0.057971	0.0507246	0.0434783	0.137681	0.137681	0.108696	0.115942	0.115942	0.115942	0.00132546	0.0013825	0.00136797	0.0011848	0.00114511	0.00113512	0.00104792	0.00096976	0.000827808	0.00130778	0.00130925	0.00111774	0.00145184	0.00134314
82	Erythrocyte band 7 integral membrane protein OS=Homo sapiens GN=STOM PE=1 SV=3	STOM_HUMAN	32	8.07	Homo Sapiens	11	8	10	10	9	11	7	8	8	12	11	9	10	9	11	0.34375	0.25	0.3125	0.3125	0.28125	0.34375	0.21875	0.25	0.25	0.375	0.34375	0.28125	0.3125	0.28125	0.34375	0.00628765	0.00476964	0.00589935	0.00425787	0.00370371	0.00448727	0.00395426	0.00477953	0.0047599	0.00356198	0.00326881	0.00289216	0.00391315	0.00325817
83	Alpha-actinin-1 OS=Homo sapiens GN=ACTN1 PE=1 SV=2	ACTN1_HUMAN	103	5.07	Homo Sapiens	10	12	9	14	18	18	3	3	3	29	27	24	23	20	25	0.0970874	0.116505	0.0873786	0.135922	0.174757	0.174757	0.0291262	0.0291262	0.0291262	0.281553	0.262136	0.23301	0.223301	0.194175	0.242718	0.00177586	0.00222275	0.00164953	0.00185197	0.00230133	0.00228126	0.000526504	0.000556839	0.000554551	0.00267436	0.00249272	0.00239609	0.00279619	0.00224944
84	Keratin, type II cytoskeletal 5 OS=Homo sapiens GN=KRT5 PE=1 SV=3	K2C5_HUMAN	62	7.91	Homo Sapiens	15	14	16	21	22	19	12	13	12	48	50	28	36	29	36	0.241935	0.225806	0.258065	0.33871	0.354839	0.306452	0.193548	0.209677	0.193548	0.774194	0.806452	0.451613	0.580645	0.467742	0.580645	0.00442533	0.00430806	0.00487172	0.00461498	0.00467278	0.00400039	0.0034987	0.00400864	0.00368508	0.00735376	0.00766876	0.00464404	0.00727089	0.00541861
85	Complement C1s subcomponent OS=Homo sapiens GN=C1S PE=1 SV=1	C1S_HUMAN	77	4.59	Homo Sapiens	5	2	4	3	3	6	2	3	4	10	9	9	7	9	9	0.0649351	0.025974	0.0519481	0.038961	0.038961	0.0779221	0.025974	0.038961	0.0519481	0.12987	0.116883	0.116883	0.0909091	0.116883	0.116883	0.00118775	0.000495547	0.000980671	0.000530851	0.000513068	0.00101719	0.000469523	0.000744862	0.00098907	0.00123358	0.00111147	0.00120194	0.00113837	0.00135405
86	Platelet factor 4 OS=Homo sapiens GN=PF4 PE=1 SV=2	PLF4_HUMAN	11	8.78	Homo Sapiens	10	8	10	9	9	11	6	5	7	7	6	4	7	5	5	0.909091	0.727273	0.909091	0.818182	0.818182	1	0.545455	0.454545	0.636364	0.636364	0.545455	0.363636	0.636364	0.454545	0.454545	0.0166285	0.0138753	0.0171617	0.0111479	0.0107744	0.0130539	0.00985998	0.00869006	0.0121161	0.00604456	0.00518687	0.00373936	0.0079686	0.00526573
87	Complement component C7 OS=Homo sapiens GN=C7 PE=1 SV=2	CO7_HUMAN	94	6.44	Homo Sapiens	7	5	6	15	16	18	6	6	5	18	20	21	19	18	18	0.0744681	0.0531915	0.0638298	0.159574	0.170213	0.191489	0.0638298	0.0638298	0.0531915	0.191489	0.212766	0.223404	0.202128	0.191489	0.191489	0.00136212	0.00101482	0.00120497	0.00217423	0.00224149	0.00249968	0.00115383	0.00122031	0.00101274	0.00181888	0.00202325	0.00229732	0.00253106	0.00221833
88	Properdin OS=Homo sapiens GN=CFP PE=1 SV=2	PROP_HUMAN	51	7.92	Homo Sapiens	19	15	21	29	28	25	15	18	19	20	26	18	17	21	21	0.372549	0.294118	0.411765	0.568627	0.54902	0.490196	0.294118	0.352941	0.372549	0.392157	0.509804	0.352941	0.333333	0.411765	0.411765	0.00681442	0.00561134	0.00777326	0.00774765	0.00722989	0.00639896	0.00531665	0.00674758	0.00709318	0.00372494	0.00484786	0.00362938	0.00417403	0.00477013
89	Apolipoprotein C-II OS=Homo sapiens GN=APOC2 PE=1 SV=1	APOC2_HUMAN	11	4.36	Homo Sapiens	9	10	12	11	8	10	9	9	9	8	7	6	6	8	7	0.818182	0.909091	1.09091	1	0.727273	0.909091	0.818182	0.818182	0.818182	0.727273	0.636364	0.545455	0.545455	0.727273	0.636364	0.0149656	0.0173442	0.0205941	0.0136252	0.00957726	0.0118672	0.01479	0.0156421	0.0155778	0.00690807	0.00605135	0.00560904	0.00683023	0.00842517
90	Glyceraldehyde-3-phosphate dehydrogenase OS=Homo sapiens GN=GAPDH PE=1 SV=3	G3P_HUMAN	36	8.73	Homo Sapiens	10	11	9	12	14	13	5	4	6	17	19	16	13	17	14	0.277778	0.305556	0.25	0.333333	0.388889	0.361111	0.138889	0.111111	0.166667	0.472222	0.527778	0.444444	0.361111	0.472222	0.388889	0.00508093	0.00582956	0.00471948	0.00454173	0.00512118	0.0047139	0.00251064	0.00212424	0.00317327	0.00448545	0.00501878	0.00457033	0.00452186	0.00547051
91	Protein AMBP OS=Homo sapiens GN=AMBP PE=1 SV=1	AMBP_HUMAN	39	6.15	Homo Sapiens	4	3	3	5	5	5	7	6	7	18	15	12	9	8	10	0.102564	0.0769231	0.0769231	0.128205	0.128205	0.128205	0.179487	0.153846	0.179487	0.461538	0.384615	0.307692	0.230769	0.205128	0.25641	0.00187604	0.00146758	0.00145215	0.00174682	0.0016883	0.00167358	0.00324452	0.00294125	0.00341736	0.00438397	0.00365741	0.00316407	0.00288971	0.00237633
92	CD5 antigen-like OS=Homo sapiens GN=CD5L PE=1 SV=1	CD5L_HUMAN	38	5.15	Homo Sapiens	10	9	9	13	14	14	9	8	10	10	13	10	10	11	11	0.263158	0.236842	0.236842	0.342105	0.368421	0.368421	0.236842	0.210526	0.263158	0.263158	0.342105	0.263158	0.263158	0.289474	0.289474	0.00481351	0.00451861	0.00447109	0.00466124	0.00485164	0.00480933	0.00428131	0.00402487	0.00501042	0.00249963	0.00325317	0.00270611	0.00329529	0.00335344
93	Apolipoprotein C-I OS=Homo sapiens GN=APOC1 PE=1 SV=1	APOC1_HUMAN	9	9.17	Homo Sapiens	6	8	5	8	5	8	4	6	5	7	8	8	7	6	7	0.666667	0.888889	0.555556	0.888889	0.555556	0.888889	0.444444	0.666667	0.555556	0.777778	0.888889	0.888889	0.777778	0.666667	0.777778	0.0121942	0.0169587	0.0104877	0.0121113	0.00731597	0.0116035	0.00803405	0.0127454	0.0105776	0.0073878	0.00845268	0.00914065	0.0097394	0.00772308
94	Keratin, type I cytoskeletal 14 OS=Homo sapiens GN=KRT14 PE=1 SV=4	K1C14_HUMAN	52	4.81	Homo Sapiens	20	20	20	28	30	29	14	12	15	67	59	45	43	46	45	0.384615	0.384615	0.384615	0.538462	0.576923	0.557692	0.269231	0.230769	0.288462	1.28846	1.13462	0.865385	0.826923	0.884615	0.865385	0.00703513	0.00733791	0.00726074	0.00733663	0.00759735	0.00728005	0.00486678	0.00441188	0.00549219	0.0122386	0.0107894	0.00889895	0.0103548	0.0102479
95	Fibulin-1 OS=Homo sapiens GN=FBLN1 PE=1 SV=4	FBLN1_HUMAN	77	4.86	Homo Sapiens	2	0	2	2	2	3	0	0	0	20	21	16	14	14	15	0.025974	0	0.025974	0.025974	0.025974	0.038961	0	0	0	0.25974	0.272727	0.207792	0.181818	0.181818	0.194805	0.0004751	0	0.000490336	0.000353901	0.000342045	0.000508593	0	0	0	0.00246717	0.00259344	0.00213678	0.00227674	0.00210629
96	Serum amyloid A-1 protein OS=Homo sapiens GN=SAA1 PE=1 SV=1	SAA1_HUMAN	14	6.79	Homo Sapiens	2	0	0	0	0	0	0	0	0	6	6	4	4	3	5	0.142857	0	0	0	0	0	0	0	0	0.428571	0.428571	0.285714	0.285714	0.214286	0.357143	0.00261305	0	0	0	0	0	0	0	0	0.00407083	0.0040754	0.00293807	0.00357774	0.00248242
97	Alpha-1B-glycoprotein OS=Homo sapiens GN=A1BG PE=1 SV=4	A1BG_HUMAN	54	5.71	Homo Sapiens	2	0	0	2	3	4	5	4	4	5	8	7	5	7	8	0.037037	0	0	0.037037	0.0555556	0.0740741	0.0925926	0.0740741	0.0740741	0.0925926	0.148148	0.12963	0.0925926	0.12963	0.148148	0.000677457	0	0	0.000504636	0.000731597	0.000966955	0.00167376	0.00141616	0.00141034	0.0008795	0.00140878	0.00133301	0.00115945	0.00150171
98	Ankyrin-1 OS=Homo sapiens GN=ANK1 PE=1 SV=3	ANK1_HUMAN	206	5.92	Homo Sapiens	3	2	2	2	5	5	0	0	0	5	4	5	6	7	7	0.0145631	0.00970874	0.00970874	0.00970874	0.0242718	0.0242718	0	0	0	0.0242718	0.0194175	0.0242718	0.0291262	0.0339806	0.0339806	0.000266379	0.000185229	0.000183281	0.000132283	0.00031963	0.000316842	0	0	0	0.000230549	0.000184646	0.000249593	0.000364721	0.000393652
99	Ficolin-3 OS=Homo sapiens GN=FCN3 PE=1 SV=2	FCN3_HUMAN	33	6.66	Homo Sapiens	0	0	0	0	0	0	0	0	0	0	0	6	0	0	0	0	0	0	0	0	0	0	0	0	0	0	0.181818	0	0	0	0	0	0	0	0	0	0	0	0	0	0	0.00186968	0	0
100	Haptoglobin-related protein OS=Homo sapiens GN=HPR PE=2 SV=2	HPTR_HUMAN	39	7.11	Homo Sapiens	14	12	13	13	15	15	15	15	13	22	21	21	19	20	17	0.358974	0.307692	0.333333	0.333333	0.384615	0.384615	0.384615	0.384615	0.333333	0.564103	0.538462	0.538462	0.487179	0.512821	0.435897	0.00656613	0.00587033	0.00629264	0.00454173	0.0050649	0.00502073	0.00695255	0.00735313	0.00634653	0.00535819	0.00512037	0.00553713	0.0061005	0.00594083
101	Complement component C8 alpha chain OS=Homo sapiens GN=C8A PE=1 SV=2	CO8A_HUMAN	65	6.41	Homo Sapiens	5	7	9	13	13	13	3	3	3	19	20	17	19	13	17	0.0769231	0.107692	0.138462	0.2	0.2	0.2	0.0461538	0.0461538	0.0461538	0.292308	0.307692	0.261538	0.292308	0.2	0.261538	0.00140703	0.00205462	0.00261387	0.00272504	0.00263375	0.00261078	0.000834306	0.000882375	0.00087875	0.00277651	0.00292593	0.00268946	0.0036603	0.00231692
102	Tropomyosin alpha-4 chain OS=Homo sapiens GN=TPM4 PE=1 SV=3	TPM4_HUMAN	29	4.36	Homo Sapiens	12	14	15	9	13	13	6	5	7	16	15	15	15	12	14	0.413793	0.482759	0.517241	0.310345	0.448276	0.448276	0.206897	0.172414	0.241379	0.551724	0.517241	0.517241	0.517241	0.413793	0.482759	0.00756883	0.00921034	0.00976444	0.0042285	0.00590323	0.00585174	0.00373999	0.00329623	0.00459576	0.00524061	0.00491859	0.00531891	0.00647694	0.00479363
103	Complement factor H-related protein 5 OS=Homo sapiens GN=CFHR5 PE=1 SV=1	FHR5_HUMAN	64	7.08	Homo Sapiens	7	7	6	20	19	15	5	6	6	14	15	16	11	13	14	0.109375	0.109375	0.09375	0.3125	0.296875	0.234375	0.078125	0.09375	0.09375	0.21875	0.234375	0.25	0.171875	0.203125	0.21875	0.00200062	0.00208672	0.00176981	0.00425787	0.00390947	0.00305951	0.00141224	0.00179233	0.00178496	0.00207782	0.00222873	0.00257081	0.00215223	0.00235312
104	Desmoplakin OS=Homo sapiens GN=DSP PE=1 SV=3	DESP_HUMAN	332	6.78	Homo Sapiens	6	2	2	6	7	7	7	9	5	31	29	16	9	13	17	0.0180723	0.0060241	0.0060241	0.0180723	0.0210843	0.0210843	0.0210843	0.0271084	0.0150602	0.0933735	0.0873494	0.0481928	0.0271084	0.0391566	0.0512048	0.000330567	0.000114931	0.000113722	0.000246238	0.000277654	0.000275233	0.000381134	0.000518263	0.000286741	0.000886918	0.000830629	0.000495578	0.000339454	0.000453614
105	Antithrombin-III OS=Homo sapiens GN=SERPINC1 PE=1 SV=1	ANT3_HUMAN	53	6.68	Homo Sapiens	2	0	0	3	5	4	2	3	0	6	9	8	7	6	10	0.0377358	0	0	0.0566038	0.0943396	0.0754717	0.0377358	0.0566038	0	0.113208	0.169811	0.150943	0.132075	0.113208	0.188679	0.00069024	0	0	0.000771236	0.00124233	0.000985199	0.000682137	0.00108216	0	0.00107531	0.00161478	0.00155219	0.00165386	0.00131147
106	Complement C1q subcomponent subunit B OS=Homo sapiens GN=C1QB PE=1 SV=3	C1QB_HUMAN	27	8.87	Homo Sapiens	9	6	6	8	11	9	2	3	3	9	8	7	5	5	5	0.333333	0.222222	0.222222	0.296296	0.407407	0.333333	0.0740741	0.111111	0.111111	0.333333	0.296296	0.259259	0.185185	0.185185	0.185185	0.00609712	0.00423968	0.00419509	0.00403709	0.00536504	0.0043513	0.00133901	0.00212424	0.00211551	0.0031662	0.00281756	0.00266602	0.0023189	0.0021453
107	Tubulin beta-1 chain OS=Homo sapiens GN=TUBB1 PE=1 SV=1	TBB1_HUMAN	50	4.82	Homo Sapiens	9	9	10	9	17	13	5	4	3	22	17	15	15	16	13	0.18	0.18	0.2	0.18	0.34	0.26	0.1	0.08	0.06	0.44	0.34	0.3	0.3	0.32	0.26	0.00329244	0.00343414	0.00377558	0.00245253	0.00447737	0.00339401	0.00180766	0.00152945	0.00114238	0.00417938	0.00323315	0.00308497	0.00375663	0.00370708
108	Complement C1q subcomponent subunit C OS=Homo sapiens GN=C1QC PE=1 SV=3	C1QC_HUMAN	26	8.58	Homo Sapiens	6	5	6	8	10	7	6	5	4	4	6	5	4	4	4	0.230769	0.192308	0.230769	0.307692	0.384615	0.269231	0.230769	0.192308	0.153846	0.153846	0.230769	0.192308	0.153846	0.153846	0.153846	0.00422108	0.00366896	0.00435644	0.00419236	0.0050649	0.00351451	0.00417153	0.00367656	0.00292917	0.00146132	0.00219445	0.00197755	0.00192647	0.00178225
109	14-3-3 protein zeta/delta OS=Homo sapiens GN=YWHAZ PE=1 SV=1	1433Z_HUMAN	28	4.43	Homo Sapiens	13	9	8	15	18	13	6	8	7	12	11	13	11	11	14	0.464286	0.321429	0.285714	0.535714	0.642857	0.464286	0.214286	0.285714	0.25	0.428571	0.392857	0.464286	0.392857	0.392857	0.5	0.00849241	0.0061324	0.00539369	0.0072992	0.00846562	0.00606073	0.00387356	0.00546232	0.0047599	0.00407083	0.00373578	0.00477436	0.00491939	0.0045511
110	Ig kappa chain V-I region WEA OS=Homo sapiens PE=1 SV=1	KV118_HUMAN	12	9.15	Homo Sapiens	0	0	0	0	0	0	0	0	0	0	0	0	0	0	0	0	0	0	0	0	0	0	0	0	0	0	0	0	0	0	0	0	0	0	0	0	0	0	0	0	0	0	0	0
111	Fermitin family homolog 3 OS=Homo sapiens GN=FERMT3 PE=1 SV=1	URP2_HUMAN	76	6.98	Homo Sapiens	9	6	11	9	8	7	6	4	5	19	17	15	13	18	16	0.118421	0.0789474	0.144737	0.118421	0.105263	0.0921053	0.0789474	0.0526316	0.0657895	0.25	0.223684	0.197368	0.171053	0.236842	0.210526	0.00216608	0.0015062	0.00273233	0.00161351	0.00138618	0.00120233	0.0014271	0.00100622	0.0012526	0.00237465	0.00212707	0.00202959	0.00214194	0.00274372
112	Inter-alpha-trypsin inhibitor heavy chain H3 OS=Homo sapiens GN=ITIH3 PE=1 SV=2	ITIH3_HUMAN	100	5.49	Homo Sapiens	2	0	0	0	0	0	0	0	0	12	12	11	6	8	6	0.02	0	0	0	0	0	0	0	0	0.12	0.12	0.11	0.06	0.08	0.06	0.000365827	0	0	0	0	0	0	0	0	0.00113983	0.00114111	0.00113116	0.000751325	0.000926769
113	Myosin light polypeptide 6 OS=Homo sapiens GN=MYL6 PE=1 SV=2	MYL6_HUMAN	17	4.29	Homo Sapiens	12	11	12	11	13	14	8	9	7	16	16	15	14	14	16	0.705882	0.647059	0.705882	0.647059	0.764706	0.823529	0.470588	0.529412	0.411765	0.941176	0.941176	0.882353	0.823529	0.823529	0.941176	0.0129115	0.012345	0.0133256	0.00881629	0.0100702	0.0107503	0.00850665	0.0101214	0.00783983	0.00893986	0.0089499	0.00907344	0.0103123	0.00954027
114	Immunoglobulin lambda-like polypeptide 5 OS=Homo sapiens GN=IGLL5 PE=2 SV=2	IGLL5_HUMAN	23	9.05	Homo Sapiens	0	0	5	19	16	14	10	8	5	0	0	11	9	10	11	0	0	0.217391	0.826087	0.695652	0.608696	0.434783	0.347826	0.217391	0	0	0.478261	0.391304	0.434783	0.478261	0	0	0.0041039	0.0112556	0.00916086	0.00794584	0.0078594	0.00664979	0.00413904	0	0	0.00491807	0.00489995	0.00503679
115	Filaggrin-2 OS=Homo sapiens GN=FLG2 PE=1 SV=1	FILA2_HUMAN	248	8.35	Homo Sapiens	6	8	4	5	7	10	11	4	8	21	22	11	8	10	9	0.0241935	0.0322581	0.016129	0.0201613	0.0282258	0.0403226	0.0443548	0.016129	0.0322581	0.0846774	0.0887097	0.0443548	0.0322581	0.0403226	0.0362903	0.000442533	0.000615438	0.000304483	0.000274701	0.000371698	0.000526366	0.000801786	0.000308357	0.00061418	0.000804317	0.000843564	0.000456111	0.000403938	0.000467122
116	Integrin-linked protein kinase OS=Homo sapiens GN=ILK PE=1 SV=2	ILK_HUMAN	51	8.18	Homo Sapiens	7	6	6	8	5	10	3	3	3	10	6	12	11	11	8	0.137255	0.117647	0.117647	0.156863	0.0980392	0.196078	0.0588235	0.0588235	0.0588235	0.196078	0.117647	0.235294	0.215686	0.215686	0.156863	0.00251058	0.00224454	0.00222093	0.00213728	0.00129105	0.00255959	0.00106333	0.0011246	0.00111998	0.00186247	0.00111874	0.00241958	0.00270084	0.00249864
117	Tubulin alpha-1B chain OS=Homo sapiens GN=TUBA1B PE=1 SV=1	TBA1B_HUMAN	50	4.7	Homo Sapiens	3	7	3	7	9	10	0	0	0	13	15	14	13	13	14	0.06	0.14	0.06	0.14	0.18	0.2	0	0	0	0.26	0.3	0.28	0.26	0.26	0.28	0.00109748	0.002671	0.00113268	0.00190752	0.00237037	0.00261078	0	0	0	0.00246964	0.00285278	0.00287931	0.00325574	0.003012
118	Apolipoprotein M OS=Homo sapiens GN=APOM PE=1 SV=2	APOM_HUMAN	21	5.92	Homo Sapiens	0	0	0	0	0	0	0	0	0	4	0	3	4	3	4	0	0	0	0	0	0	0	0	0	0.190476	0	0.142857	0.190476	0.142857	0.190476	0	0	0	0	0	0	0	0	0	0.00180926	0	0.00146903	0.00238516	0.00165494
119	Tubulin beta chain OS=Homo sapiens GN=TUBB PE=1 SV=2	TBB5_HUMAN	50	4.52	Homo Sapiens	6	5	6	7	7	10	0	0	0	17	20	13	11	12	15	0.12	0.1	0.12	0.14	0.14	0.2	0	0	0	0.34	0.4	0.26	0.22	0.24	0.3	0.00219496	0.00190786	0.00226535	0.00190752	0.00184362	0.00261078	0	0	0	0.00322952	0.00380371	0.00267364	0.00275486	0.00278031
120	Apolipoprotein C-IV OS=Homo sapiens GN=APOC4 PE=1 SV=1	APOC4_HUMAN	15	9.13	Homo Sapiens	0	0	2	0	2	2	0	0	2	6	5	6	4	4	5	0	0	0.133333	0	0.133333	0.133333	0	0	0.133333	0.4	0.333333	0.4	0.266667	0.266667	0.333333	0	0	0.00251706	0	0.00175583	0.00174052	0	0	0.00253861	0.00379944	0.00316976	0.00411329	0.00333922	0.00308923
121	HLA class I histocompatibility antigen, A-2 alpha chain OS=Homo sapiens GN=HLA-A PE=1 SV=1	1A02_HUMAN	41	7	Homo Sapiens	5	7	7	9	9	9	7	6	2	10	12	11	8	10	13	0.121951	0.170732	0.170732	0.219512	0.219512	0.219512	0.170732	0.146341	0.0487805	0.243902	0.292683	0.268293	0.195122	0.243902	0.317073	0.00223065	0.00325732	0.00322306	0.00299089	0.0028907	0.00286549	0.00308625	0.00279778	0.000928761	0.00231673	0.0027832	0.00275892	0.00244333	0.00282552
122	Cholesteryl ester transfer protein OS=Homo sapiens GN=CETP PE=1 SV=2	CETP_HUMAN	55	6.02	Homo Sapiens	5	7	6	0	4	3	5	4	4	18	11	13	7	14	10	0.0909091	0.127273	0.109091	0	0.0727273	0.0545455	0.0909091	0.0727273	0.0727273	0.327273	0.2	0.236364	0.127273	0.254545	0.181818	0.00166285	0.00242818	0.00205941	0	0.000957726	0.00071203	0.00164333	0.00139041	0.0013847	0.00310863	0.00190185	0.00243058	0.00159372	0.00294881
123	Immunoglobulin J chain OS=Homo sapiens GN=IGJ PE=1 SV=4	IGJ_HUMAN	18	4.87	Homo Sapiens	4	4	6	6	4	5	6	5	4	4	4	5	5	3	4	0.222222	0.222222	0.333333	0.333333	0.222222	0.277778	0.333333	0.277778	0.222222	0.222222	0.222222	0.277778	0.277778	0.166667	0.222222	0.00406474	0.00423968	0.00629264	0.00454173	0.00292639	0.00362608	0.00602554	0.00531059	0.00423102	0.0021108	0.00211317	0.00285645	0.00347836	0.00193077
124	Proteoglycan 4 OS=Homo sapiens GN=PRG4 PE=1 SV=2	PRG4_HUMAN	151	10.16	Homo Sapiens	5	5	7	2	2	2	6	5	4	7	10	5	5	3	2	0.0331126	0.0331126	0.0463576	0.013245	0.013245	0.013245	0.0397351	0.0331126	0.0264901	0.0463576	0.0662252	0.0331126	0.0331126	0.0198675	0.013245	0.000605674	0.000631741	0.000875135	0.000180466	0.00017442	0.000172899	0.000718276	0.000633051	0.00050436	0.000440333	0.000629753	0.000340504	0.000414639	0.000230158
125	Latent-transforming growth factor beta-binding protein 1 OS=Homo sapiens GN=LTBP1 PE=1 SV=4	LTBP1_HUMAN	187	5.85	Homo Sapiens	3	4	0	8	7	7	2	3	4	13	11	9	11	14	11	0.0160428	0.0213904	0	0.0427807	0.0374332	0.0374332	0.0106952	0.0160428	0.0213904	0.0695187	0.0588235	0.0481283	0.0588235	0.0748663	0.0588235	0.000293444	0.000408098	0	0.000582895	0.000492947	0.000488648	0.000193333	0.000306708	0.000407264	0.000660331	0.000559369	0.000494915	0.000736593	0.000867297
126	Lactotransferrin OS=Homo sapiens GN=LTF PE=1 SV=6	TRFL_HUMAN	78	8.17	Homo Sapiens	0	0	0	0	0	0	0	0	0	0	0	0	0	0	0	0	0	0	0	0	0	0	0	0	0	0	0	0	0	0	0	0	0	0	0	0	0	0	0	0	0	0	0	0
127	Pyruvate kinase PKM OS=Homo sapiens GN=PKM PE=1 SV=4	KPYM_HUMAN	58	7.94	Homo Sapiens	5	7	5	8	8	7	4	4	2	17	12	12	10	11	11	0.0862069	0.12069	0.0862069	0.137931	0.137931	0.12069	0.0689655	0.0689655	0.0344828	0.293103	0.206897	0.206897	0.172414	0.189655	0.189655	0.00157684	0.00230259	0.00162741	0.00187933	0.00181638	0.00157547	0.00124666	0.00131849	0.000656538	0.00278407	0.00196743	0.00212757	0.00215898	0.00219708
128	Transthyretin OS=Homo sapiens GN=TTR PE=1 SV=1	TTHY_HUMAN	16	5.58	Homo Sapiens	3	4	3	5	8	6	4	4	4	7	7	7	5	6	7	0.1875	0.25	0.1875	0.3125	0.5	0.375	0.25	0.25	0.25	0.4375	0.4375	0.4375	0.3125	0.375	0.4375	0.00342963	0.00476964	0.00353961	0.00425787	0.00658437	0.00489521	0.00451916	0.00477953	0.0047599	0.00415564	0.0041603	0.00449892	0.00391315	0.00434423
129	Alpha-2-antiplasmin OS=Homo sapiens GN=SERPINF2 PE=1 SV=3	A2AP_HUMAN	55	6.24	Homo Sapiens	0	0	0	0	0	0	0	2	0	7	9	6	4	6	7	0	0	0	0	0	0	0	0.0363636	0	0.127273	0.163636	0.109091	0.0727273	0.109091	0.127273	0	0	0	0	0	0	0	0.000695205	0	0.00120891	0.00155606	0.00112181	0.000910697	0.00126378
130	EGF-containing fibulin-like extracellular matrix protein 1 OS=Homo sapiens GN=EFEMP1 PE=1 SV=2	FBLN3_HUMAN	55	4.7	Homo Sapiens	2	0	2	5	3	5	2	0	2	10	9	9	7	7	9	0.0363636	0	0.0363636	0.0909091	0.0545455	0.0909091	0.0363636	0	0.0363636	0.181818	0.163636	0.163636	0.127273	0.127273	0.163636	0.00066514	0	0.00068647	0.00123865	0.000718295	0.00118672	0.000657332	0	0.000692349	0.00172702	0.00155606	0.00168271	0.00159372	0.00147441
131	N-acetylmuramoyl-L-alanine amidase OS=Homo sapiens GN=PGLYRP2 PE=1 SV=1	PGRP2_HUMAN	62	7.59	Homo Sapiens	2	2	3	4	4	4	0	2	3	13	11	7	7	8	8	0.0322581	0.0322581	0.0483871	0.0645161	0.0645161	0.0645161	0	0.0322581	0.0483871	0.209677	0.177419	0.112903	0.112903	0.129032	0.129032	0.000590043	0.000615438	0.000913448	0.000879044	0.000849596	0.000842186	0	0.000616714	0.000921271	0.00199164	0.00168713	0.00116101	0.00141378	0.00149479
132	Ras-related protein Rap-1b OS=Homo sapiens GN=RAP1B PE=1 SV=1	RAP1B_HUMAN	21	5.39	Homo Sapiens	3	5	3	9	8	9	4	3	3	10	9	8	8	7	9	0.142857	0.238095	0.142857	0.428571	0.380952	0.428571	0.190476	0.142857	0.142857	0.47619	0.428571	0.380952	0.380952	0.333333	0.428571	0.00261305	0.00454252	0.00269685	0.00583936	0.00501666	0.00559452	0.00344317	0.00273116	0.00271994	0.00452314	0.0040754	0.00391742	0.00477032	0.00386154
133	Afamin OS=Homo sapiens GN=AFM PE=1 SV=1	AFAM_HUMAN	69	5.7	Homo Sapiens	0	0	0	0	0	0	0	0	0	4	4	4	5	9	7	0	0	0	0	0	0	0	0	0	0.057971	0.057971	0.057971	0.0724638	0.130435	0.101449	0	0	0	0	0	0	0	0	0	0.000550644	0.000551262	0.00059613	0.000907397	0.00151104
134	Ig heavy chain V-III region 23 OS=Homo sapiens GN=IGHV3-23 PE=1 SV=2	HV303_HUMAN	13	8.46	Homo Sapiens	2	2	2	4	4	5	2	0	3	4	7	5	5	4	7	0.153846	0.153846	0.153846	0.307692	0.307692	0.384615	0.153846	0	0.230769	0.307692	0.538462	0.384615	0.384615	0.307692	0.538462	0.00281405	0.00293516	0.0029043	0.00419236	0.00405192	0.00502073	0.00278102	0	0.00439375	0.00292265	0.00512037	0.00395509	0.00481619	0.0035645
135	Alpha-1-acid glycoprotein 2 OS=Homo sapiens GN=ORM2 PE=1 SV=2	A1AG2_HUMAN	24	4.76	Homo Sapiens	0	0	0	0	0	0	5	5	6	6	4	7	6	8	6	0	0	0	0	0	0	0.208333	0.208333	0.25	0.25	0.166667	0.291667	0.25	0.333333	0.25	0	0	0	0	0	0	0.00376596	0.00398294	0.0047599	0.00237465	0.00158488	0.00299928	0.00313052	0.00386154
136	Plasma kallikrein OS=Homo sapiens GN=KLKB1 PE=1 SV=1	KLKB1_HUMAN	71	8.26	Homo Sapiens	2	3	3	4	4	3	3	3	3	10	8	10	8	8	10	0.028169	0.0422535	0.0422535	0.056338	0.056338	0.0422535	0.0422535	0.0422535	0.0422535	0.140845	0.112676	0.140845	0.112676	0.112676	0.140845	0.000515249	0.000806137	0.000797659	0.000767616	0.000741901	0.000551573	0.000763801	0.000807809	0.00080449	0.00133783	0.00107147	0.00144834	0.00141094	0.00130531
137	Protein S100-A9 OS=Homo sapiens GN=S100A9 PE=1 SV=1	S10A9_HUMAN	13	6.07	Homo Sapiens	2	3	2	2	3	3	2	0	3	3	6	6	5	4	5	0.153846	0.230769	0.153846	0.153846	0.230769	0.230769	0.153846	0	0.230769	0.230769	0.461538	0.461538	0.384615	0.307692	0.384615	0.00281405	0.00440275	0.0029043	0.00209618	0.00303894	0.00301244	0.00278102	0	0.00439375	0.00219198	0.00438889	0.00474611	0.00481619	0.0035645
138	Ig kappa chain V-III region HAH OS=Homo sapiens PE=2 SV=1	KV312_HUMAN	14	8.18	Homo Sapiens	3	5	3	4	5	4	2	2	3	2	4	4	3	3	4	0.214286	0.357143	0.214286	0.285714	0.357143	0.285714	0.142857	0.142857	0.214286	0.142857	0.285714	0.285714	0.214286	0.214286	0.285714	0.00391957	0.00681377	0.00404527	0.00389291	0.00470312	0.00372968	0.00258237	0.00273116	0.00407991	0.00135694	0.00271693	0.00293807	0.0026833	0.00248242
139	Histone H4 OS=Homo sapiens GN=HIST1H4A PE=1 SV=2	H4_HUMAN	11	11.91	Homo Sapiens	0	0	0	4	5	3	0	0	0	5	5	5	5	3	4	0	0	0	0.363636	0.454545	0.272727	0	0	0	0.454545	0.454545	0.454545	0.454545	0.272727	0.363636	0	0	0	0.00495461	0.00598579	0.00356015	0	0	0	0.00431755	0.00432239	0.0046742	0.00569186	0.00315944
140	Profilin-1 OS=Homo sapiens GN=PFN1 PE=1 SV=2	PROF1_HUMAN	15	8.46	Homo Sapiens	5	6	4	6	5	5	3	3	4	7	6	6	6	7	6	0.333333	0.4	0.266667	0.4	0.333333	0.333333	0.2	0.2	0.266667	0.466667	0.4	0.4	0.4	0.466667	0.4	0.00609712	0.00763143	0.00503411	0.00545007	0.00438958	0.0043513	0.00361532	0.00382363	0.00507722	0.00443268	0.00380371	0.00411329	0.00500883	0.00540615
141	Phospholipid transfer protein OS=Homo sapiens GN=PLTP PE=1 SV=1	PLTP_HUMAN	55	7.01	Homo Sapiens	0	0	0	0	2	2	0	0	0	6	8	4	7	4	0	0	0	0	0	0.0363636	0.0363636	0	0	0	0.109091	0.145455	0.0727273	0.127273	0.0727273	0	0	0	0	0	0.000478863	0.000474687	0	0	0	0.00103621	0.00138317	0.000747872	0.00159372	0.000842517
142	Coagulation factor XIII A chain OS=Homo sapiens GN=F13A1 PE=1 SV=4	F13A_HUMAN	83	5.95	Homo Sapiens	2	0	4	7	9	7	3	0	0	11	15	10	12	9	13	0.0240964	0	0.0481928	0.0843373	0.108434	0.0843373	0.0361446	0	0	0.13253	0.180723	0.120482	0.144578	0.108434	0.156627	0.000440755	0	0.000909779	0.00114911	0.00142794	0.00110093	0.000653372	0	0	0.00125885	0.00171854	0.00123894	0.00181042	0.00125616
143	Cathelicidin antimicrobial peptide OS=Homo sapiens GN=CAMP PE=1 SV=1	CAMP_HUMAN	19	10.03	Homo Sapiens	7	7	5	6	5	7	2	4	2	7	6	7	6	6	6	0.368421	0.368421	0.263158	0.315789	0.263158	0.368421	0.105263	0.210526	0.105263	0.368421	0.315789	0.368421	0.315789	0.315789	0.315789	0.00673892	0.00702895	0.00496787	0.00430269	0.00346546	0.00480933	0.0019028	0.00402487	0.00200417	0.00349948	0.00300293	0.00378856	0.00395434	0.0036583
144	Heat shock cognate 71 kDa protein OS=Homo sapiens GN=HSPA8 PE=1 SV=1	HSP7C_HUMAN	71	5.16	Homo Sapiens	4	7	4	7	5	9	6	3	3	11	10	12	8	9	8	0.056338	0.0985915	0.056338	0.0985915	0.0704225	0.126761	0.084507	0.0422535	0.0422535	0.15493	0.140845	0.169014	0.112676	0.126761	0.112676	0.0010305	0.00188099	0.00106354	0.00134333	0.000927376	0.00165472	0.0015276	0.000807809	0.00080449	0.00147161	0.00133933	0.00173801	0.00141094	0.00146847
145	Cofilin-1 OS=Homo sapiens GN=CFL1 PE=1 SV=3	COF1_HUMAN	19	8.29	Homo Sapiens	4	4	3	6	5	7	4	4	2	5	8	6	5	4	3	0.210526	0.210526	0.157895	0.315789	0.263158	0.368421	0.210526	0.210526	0.105263	0.263158	0.421053	0.315789	0.263158	0.210526	0.157895	0.00385081	0.00401654	0.00298072	0.00430269	0.00346546	0.00480933	0.0038056	0.00402487	0.00200417	0.00249963	0.0040039	0.00324734	0.00329529	0.00243887
146	Plasma protease C1 inhibitor OS=Homo sapiens GN=SERPING1 PE=1 SV=2	IC1_HUMAN	55	6.52	Homo Sapiens	0	0	0	0	0	0	0	0	0	5	3	8	2	6	3	0	0	0	0	0	0	0	0	0	0.0909091	0.0545455	0.145455	0.0363636	0.109091	0.0545455	0	0	0	0	0	0	0	0	0	0.000863509	0.000518687	0.00149574	0.000455349	0.00126378
147	Complement component C8 gamma chain OS=Homo sapiens GN=C8G PE=1 SV=3	CO8G_HUMAN	22	8.48	Homo Sapiens	3	4	5	5	5	8	3	2	0	7	8	6	5	6	5	0.136364	0.181818	0.227273	0.227273	0.227273	0.363636	0.136364	0.0909091	0	0.318182	0.363636	0.272727	0.227273	0.272727	0.227273	0.00249427	0.00346883	0.00429044	0.00309663	0.00299289	0.00474687	0.00246499	0.00173801	0	0.00302228	0.00345792	0.00280452	0.00284593	0.00315944
148	Fructose-bisphosphate aldolase A OS=Homo sapiens GN=ALDOA PE=1 SV=2	ALDOA_HUMAN	39	8.2	Homo Sapiens	10	7	8	6	4	7	4	4	3	5	7	4	3	2	5	0.25641	0.179487	0.205128	0.153846	0.102564	0.179487	0.102564	0.102564	0.0769231	0.128205	0.179487	0.102564	0.0769231	0.0512821	0.128205	0.00469009	0.00342436	0.00387239	0.00209618	0.00135064	0.00234301	0.00185401	0.00196083	0.00146458	0.00121777	0.00170679	0.00105469	0.000963237	0.000594083
149	Angiotensinogen OS=Homo sapiens GN=AGT PE=1 SV=1	ANGT_HUMAN	53	6.27	Homo Sapiens	0	0	0	0	0	0	0	0	0	7	5	5	6	2	3	0	0	0	0	0	0	0	0	0	0.132075	0.0943396	0.0943396	0.113208	0.0377358	0.0566038	0	0	0	0	0	0	0	0	0	0.00125453	0.000897101	0.000970117	0.00141759	0.000437155
150	Myeloperoxidase OS=Homo sapiens GN=MPO PE=1 SV=1	PERM_HUMAN	84	9.14	Homo Sapiens	0	0	0	0	0	0	0	0	0	0	0	0	0	0	0	0	0	0	0	0	0	0	0	0	0	0	0	0	0	0	0	0	0	0	0	0	0	0	0	0	0	0	0	0
151	Complement factor H-related protein 1 OS=Homo sapiens GN=CFHR1 PE=1 SV=2	FHR1_HUMAN	38	7.42	Homo Sapiens	9	9	10	12	11	11	7	6	10	14	15	15	12	12	14	0.236842	0.236842	0.263158	0.315789	0.289474	0.289474	0.184211	0.157895	0.263158	0.368421	0.394737	0.394737	0.315789	0.315789	0.368421	0.00433216	0.00451861	0.00496787	0.00430269	0.003812	0.00377876	0.0033299	0.00301865	0.00501042	0.00349948	0.00375366	0.00405917	0.00395434	0.0036583
152	Sarcoplasmic/endoplasmic reticulum calcium ATPase 3 OS=Homo sapiens GN=ATP2A3 PE=1 SV=2	AT2A3_HUMAN	114	5.26	Homo Sapiens	5	10	10	11	10	10	4	0	2	16	16	13	8	12	12	0.0438596	0.0877193	0.0877193	0.0964912	0.0877193	0.0877193	0.0350877	0	0.0175439	0.140351	0.140351	0.114035	0.0701754	0.105263	0.105263	0.000802252	0.00167356	0.00165596	0.00131471	0.00115515	0.00114508	0.000634267	0	0.000334028	0.00133314	0.00133463	0.00117265	0.000878743	0.00121943
153	Complement C4-A OS=Homo sapiens GN=C4A PE=1 SV=2	CO4A_HUMAN	193	7.08	Homo Sapiens	73	83	81	120	122	118	80	68	71	134	137	110	100	107	111	0.378238	0.430052	0.419689	0.621762	0.632124	0.611399	0.414508	0.352332	0.367876	0.694301	0.709845	0.569948	0.518135	0.554404	0.57513	0.00691849	0.00820477	0.00792286	0.00847161	0.00832428	0.00798113	0.0074929	0.00673592	0.0070042	0.00659488	0.0067501	0.00586091	0.00648813	0.00642256
154	Coagulation factor XII OS=Homo sapiens GN=F12 PE=1 SV=3	FA12_HUMAN	68	7.76	Homo Sapiens	2	2	0	0	0	3	0	0	0	5	5	4	2	3	4	0.0294118	0.0294118	0	0	0	0.0441176	0	0	0	0.0735294	0.0735294	0.0588235	0.0294118	0.0441176	0.0588235	0.000537981	0.000561134	0	0	0	0.000575907	0	0	0	0.000698427	0.000699211	0.000604896	0.000368297	0.000511086
155	Ig alpha-2 chain C region OS=Homo sapiens GN=IGHA2 PE=1 SV=3	IGHA2_HUMAN	37	6.02	Homo Sapiens	0	0	0	12	8	0	0	0	0	10	12	15	12	12	13	0	0	0	0.324324	0.216216	0	0	0	0	0.27027	0.324324	0.405405	0.324324	0.324324	0.351351	0	0	0	0.00441898	0.00284729	0	0	0	0	0.00256719	0.00308409	0.00416888	0.00406122	0.00375717
156	Integrin beta-1 OS=Homo sapiens GN=ITGB1 PE=1 SV=2	ITB1_HUMAN	88	5.04	Homo Sapiens	2	5	3	6	8	9	3	3	3	9	11	8	8	7	12	0.0227273	0.0568182	0.0340909	0.0681818	0.0909091	0.102273	0.0340909	0.0340909	0.0340909	0.102273	0.125	0.0909091	0.0909091	0.0795455	0.136364	0.000415712	0.00108401	0.000643566	0.000928989	0.00119716	0.00133506	0.000616248	0.000651755	0.000649077	0.000971448	0.00118866	0.00093484	0.00113837	0.000921503
157	Monocyte differentiation antigen CD14 OS=Homo sapiens GN=CD14 PE=1 SV=2	CD14_HUMAN	40	6.16	Homo Sapiens	2	3	2	0	2	4	4	3	3	6	6	5	6	6	5	0.05	0.075	0.05	0	0.05	0.1	0.1	0.075	0.075	0.15	0.15	0.125	0.15	0.15	0.125	0.000914567	0.00143089	0.000943896	0	0.000658437	0.00130539	0.00180766	0.00143386	0.00142797	0.00142479	0.00142639	0.0012854	0.00187831	0.00173769
158	Pleckstrin OS=Homo sapiens GN=PLEK PE=1 SV=3	PLEK_HUMAN	40	8.45	Homo Sapiens	4	4	3	7	8	9	3	2	3	8	4	6	6	4	6	0.1	0.1	0.075	0.175	0.2	0.225	0.075	0.05	0.075	0.2	0.1	0.15	0.15	0.1	0.15	0.00182913	0.00190786	0.00141584	0.00238441	0.00263375	0.00293712	0.00135575	0.000955907	0.00142797	0.00189972	0.000950927	0.00154249	0.00187831	0.00115846
159	Desmoglein-1 OS=Homo sapiens GN=DSG1 PE=1 SV=2	DSG1_HUMAN	114	4.66	Homo Sapiens	3	5	5	4	3	4	2	3	3	19	17	10	7	8	9	0.0263158	0.0438596	0.0438596	0.0350877	0.0263158	0.0350877	0.0175439	0.0263158	0.0263158	0.166667	0.149123	0.0877193	0.0614035	0.0701754	0.0789474	0.000481351	0.000836779	0.000827979	0.000478076	0.000346546	0.000458031	0.000317134	0.000503109	0.000501042	0.0015831	0.00141805	0.000902038	0.0007689	0.000812955
160	Junction plakoglobin OS=Homo sapiens GN=JUP PE=1 SV=3	PLAK_HUMAN	82	6.05	Homo Sapiens	2	0	0	3	0	2	2	3	0	20	21	12	7	10	9	0.0243902	0	0	0.0365854	0	0.0243902	0.0243902	0.0365854	0	0.243902	0.256098	0.146341	0.0853659	0.121951	0.109756	0.00044613	0	0	0.000498482	0	0.000318388	0.000440893	0.000699444	0	0.00231673	0.0024353	0.00150486	0.00106896	0.00141276
161	Protein Z-dependent protease inhibitor OS=Homo sapiens GN=SERPINA10 PE=1 SV=1	ZPI_HUMAN	51	8.58	Homo Sapiens	0	0	0	0	0	0	2	2	0	0	4	0	0	0	3	0	0	0	0	0	0	0.0392157	0.0392157	0	0	0.0784314	0	0	0	0.0588235	0	0	0	0	0	0	0.000708887	0.000749731	0	0	0.000745825	0	0	0
162	Complement factor I OS=Homo sapiens GN=CFI PE=1 SV=2	CFAI_HUMAN	66	7.53	Homo Sapiens	0	0	0	2	2	3	0	0	0	2	4	5	4	5	3	0	0	0	0.030303	0.030303	0.0454545	0	0	0	0.030303	0.0606061	0.0757576	0.0606061	0.0757576	0.0454545	0	0	0	0.000412884	0.000399053	0.000593359	0	0	0	0.000287836	0.000576319	0.000779033	0.000758914	0.000877622
163	Platelet glycoprotein IX OS=Homo sapiens GN=GP9 PE=1 SV=3	GPIX_HUMAN	19	6.32	Homo Sapiens	3	4	4	3	3	5	4	4	4	7	7	4	6	6	6	0.157895	0.210526	0.210526	0.157895	0.157895	0.263158	0.210526	0.210526	0.210526	0.368421	0.368421	0.210526	0.315789	0.315789	0.315789	0.00288811	0.00401654	0.0039743	0.00215134	0.00207927	0.00343523	0.0038056	0.00402487	0.00400834	0.00349948	0.00350341	0.00216489	0.00395434	0.0036583
164	Glutathione peroxidase 3 OS=Homo sapiens GN=GPX3 PE=1 SV=2	GPX3_HUMAN	26	8.29	Homo Sapiens	0	0	0	0	0	3	0	0	2	8	6	6	6	5	5	0	0	0	0	0	0.115385	0	0	0.0769231	0.307692	0.230769	0.230769	0.230769	0.192308	0.192308	0	0	0	0	0	0.00150622	0	0	0.00146458	0.00292265	0.00219445	0.00237305	0.00288971	0.00222781
165	Sulfhydryl oxidase 1 OS=Homo sapiens GN=QSOX1 PE=1 SV=3	QSOX1_HUMAN	83	9.18	Homo Sapiens	0	0	0	0	0	0	0	0	0	9	10	8	6	3	8	0	0	0	0	0	0	0	0	0	0.108434	0.120482	0.0963855	0.0722892	0.0361446	0.0963855	0	0	0	0	0	0	0	0	0	0.00102997	0.00114569	0.000991155	0.000905211	0.000418721
166	Complement C2 OS=Homo sapiens GN=C2 PE=1 SV=2	CO2_HUMAN	83	7.43	Homo Sapiens	0	0	0	2	0	0	0	0	0	6	7	10	7	8	9	0	0	0	0.0240964	0	0	0	0	0	0.0722892	0.0843373	0.120482	0.0843373	0.0963855	0.108434	0	0	0	0.000328317	0	0	0	0	0	0.000686646	0.000801986	0.00123894	0.00105608	0.00111659
167	Keratin, type I cytoskeletal 17 OS=Homo sapiens GN=KRT17 PE=1 SV=2	K1C17_HUMAN	48	4.67	Homo Sapiens	0	0	0	11	14	16	0	4	6	32	33	23	22	26	24	0	0	0	0.229167	0.291667	0.333333	0	0.0833333	0.125	0.666667	0.6875	0.479167	0.458333	0.541667	0.5	0	0	0	0.00312244	0.00384088	0.0043513	0	0.00159318	0.00237995	0.0063324	0.00653762	0.00492738	0.00573929	0.006275
168	Platelet basic protein OS=Homo sapiens GN=PPBP PE=1 SV=3	CXCL7_HUMAN	14	9.07	Homo Sapiens	3	4	5	6	6	6	3	3	4	5	6	5	5	5	5	0.214286	0.285714	0.357143	0.428571	0.428571	0.428571	0.214286	0.214286	0.285714	0.357143	0.428571	0.357143	0.357143	0.357143	0.357143	0.00391957	0.00545102	0.00674211	0.00583936	0.00564374	0.00559452	0.00387356	0.00409674	0.00543988	0.00339236	0.0040754	0.00367258	0.00447217	0.00413736
169	Guanine nucleotide-binding protein G(i) subunit alpha-2 OS=Homo sapiens GN=GNAI2 PE=1 SV=3	GNAI2_HUMAN	40	5.2	Homo Sapiens	3	5	4	6	7	5	2	2	2	8	6	6	6	6	7	0.075	0.125	0.1	0.15	0.175	0.125	0.05	0.05	0.05	0.2	0.15	0.15	0.15	0.15	0.175	0.00137185	0.00238482	0.00188779	0.00204378	0.00230453	0.00163174	0.000903831	0.000955907	0.00095198	0.00189972	0.00142639	0.00154249	0.00187831	0.00173769
170	60 kDa heat shock protein, mitochondrial OS=Homo sapiens GN=HSPD1 PE=1 SV=2	CH60_HUMAN	61	5.55	Homo Sapiens	9	8	9	7	9	9	7	6	7	9	8	6	4	5	7	0.147541	0.131148	0.147541	0.114754	0.147541	0.147541	0.114754	0.0983607	0.114754	0.147541	0.131148	0.0983607	0.0655738	0.0819672	0.114754	0.00269872	0.00250211	0.00278527	0.00156354	0.00194293	0.00192598	0.00207437	0.00188047	0.00218487	0.00140143	0.00124712	0.00101147	0.00082112	0.000949558
171	Leucine-rich alpha-2-glycoprotein OS=Homo sapiens GN=LRG1 PE=1 SV=2	A2GL_HUMAN	38	6.95	Homo Sapiens	0	0	0	0	0	0	0	3	2	0	0	0	0	0	0	0	0	0	0	0	0	0	0.0789474	0.0526316	0	0	0	0	0	0	0	0	0	0	0	0	0	0.00150933	0.00100208	0	0	0	0	0
172	Retinol-binding protein 4 OS=Homo sapiens GN=RBP4 PE=1 SV=3	RET4_HUMAN	23	5.85	Homo Sapiens	0	0	0	0	0	4	0	0	0	4	5	4	5	4	4	0	0	0	0	0	0.173913	0	0	0	0.173913	0.217391	0.173913	0.217391	0.173913	0.173913	0	0	0	0	0	0.00227024	0	0	0	0.00165193	0.00206723	0.00178839	0.00272219	0.00201472
173	Peptidyl-prolyl cis-trans isomerase A OS=Homo sapiens GN=PPIA PE=1 SV=2	PPIA_HUMAN	18	7.97	Homo Sapiens	5	4	5	4	8	6	6	4	5	5	4	4	6	6	6	0.277778	0.222222	0.277778	0.222222	0.444444	0.333333	0.333333	0.222222	0.277778	0.277778	0.222222	0.222222	0.333333	0.333333	0.333333	0.00508093	0.00423968	0.00524387	0.00302782	0.00585277	0.0043513	0.00602554	0.00424847	0.00528878	0.0026385	0.00211317	0.00228516	0.00417403	0.00386154
174	ATP synthase subunit beta, mitochondrial OS=Homo sapiens GN=ATP5B PE=1 SV=3	ATPB_HUMAN	57	5.07	Homo Sapiens	6	7	9	5	4	6	5	4	0	11	11	10	7	10	11	0.105263	0.122807	0.157895	0.0877193	0.0701754	0.105263	0.0877193	0.0701754	0	0.192982	0.192982	0.175439	0.122807	0.175439	0.192982	0.00192541	0.00234298	0.00298072	0.00119519	0.000924122	0.00137409	0.00158567	0.00134162	0	0.00183306	0.00183512	0.00180408	0.0015378	0.00203239
175	Complement C1q subcomponent subunit A OS=Homo sapiens GN=C1QA PE=1 SV=2	C1QA_HUMAN	26	9.45	Homo Sapiens	2	0	0	5	6	3	2	2	2	8	2	9	5	4	4	0.0769231	0	0	0.192308	0.230769	0.115385	0.0769231	0.0769231	0.0769231	0.307692	0.0769231	0.346154	0.192308	0.153846	0.153846	0.00140703	0	0	0.00262023	0.00303894	0.00150622	0.00139051	0.00147063	0.00146458	0.00292265	0.000731482	0.00355958	0.00240809	0.00178225
176	WD repeat-containing protein 1 OS=Homo sapiens GN=WDR1 PE=1 SV=4	WDR1_HUMAN	66	6.64	Homo Sapiens	3	2	4	3	4	3	3	4	0	5	4	7	3	4	5	0.0454545	0.030303	0.0606061	0.0454545	0.0606061	0.0454545	0.0454545	0.0606061	0	0.0757576	0.0606061	0.106061	0.0454545	0.0606061	0.0757576	0.000831425	0.000578138	0.00114412	0.000619326	0.000798105	0.000593359	0.000821665	0.00115867	0	0.000719591	0.000576319	0.00109065	0.000569186	0.000702098
177	Apolipoprotein F OS=Homo sapiens GN=APOF PE=1 SV=2	APOF_HUMAN	35	5.36	Homo Sapiens	0	0	0	0	0	0	0	2	0	6	5	5	4	3	4	0	0	0	0	0	0	0	0.0571429	0	0.171429	0.142857	0.142857	0.114286	0.0857143	0.114286	0	0	0	0	0	0	0	0.00109246	0	0.00162833	0.00135847	0.00146903	0.0014311	0.000992967
178	Neutrophil defensin 1 OS=Homo sapiens GN=DEFA1 PE=1 SV=1	DEF1_HUMAN	10	7.04	Homo Sapiens	0	0	2	0	0	0	0	0	0	0	2	0	0	0	0	0	0	0.2	0	0	0	0	0	0	0	0.2	0	0	0	0	0	0	0.00377558	0	0	0	0	0	0	0	0.00190185	0	0	0
179	Keratin, type I cytoskeletal 13 OS=Homo sapiens GN=KRT13 PE=1 SV=4	K1C13_HUMAN	50	4.61	Homo Sapiens	0	0	0	10	10	11	0	0	0	18	20	27	21	24	24	0	0	0	0.2	0.2	0.22	0	0	0	0.36	0.4	0.54	0.42	0.48	0.48	0	0	0	0.00272504	0.00263375	0.00287186	0	0	0	0.0034195	0.00380371	0.00555295	0.00525928	0.00556061
180	Keratin, type II cuticular Hb6 OS=Homo sapiens GN=KRT86 PE=1 SV=1	KRT86_HUMAN	53	5.35	Homo Sapiens	0	0	0	0	0	0	0	0	0	0	3	4	2	3	4	0	0	0	0	0	0	0	0	0	0	0.0566038	0.0754717	0.0377358	0.0566038	0.0754717	0	0	0	0	0	0	0	0	0	0	0.00053826	0.000776093	0.000472532	0.000655733
181	Moesin OS=Homo sapiens GN=MSN PE=1 SV=3	MOES_HUMAN	68	6.32	Homo Sapiens	2	3	2	4	6	5	2	3	2	4	0	2	4	5	3	0.0294118	0.0441176	0.0294118	0.0588235	0.0882353	0.0735294	0.0294118	0.0441176	0.0294118	0.0588235	0	0.0294118	0.0588235	0.0735294	0.0441176	0.000537981	0.000841702	0.000555233	0.000801481	0.00116195	0.000959845	0.000531665	0.000843447	0.000559988	0.000558741	0	0.000302448	0.000736593	0.00085181
182	Clathrin heavy chain 1 OS=Homo sapiens GN=CLTC PE=1 SV=5	CLH1_HUMAN	192	5.42	Homo Sapiens	2	2	3	6	4	4	0	0	0	7	5	3	7	6	5	0.0104167	0.0104167	0.015625	0.03125	0.0208333	0.0208333	0	0	0	0.0364583	0.0260417	0.015625	0.0364583	0.03125	0.0260417	0.000190535	0.000198735	0.000294968	0.000425787	0.000274349	0.000271956	0	0	0	0.000346303	0.000247637	0.000160676	0.000456534	0.000362019
183	Keratin, type II cytoskeletal 4 OS=Homo sapiens GN=KRT4 PE=1 SV=4	K2C4_HUMAN	57	6.55	Homo Sapiens	0	0	0	0	6	6	0	0	5	15	16	28	20	17	25	0	0	0	0	0.105263	0.105263	0	0	0.0877193	0.263158	0.280702	0.491228	0.350877	0.298246	0.438596	0	0	0	0	0.00138618	0.00137409	0	0	0.00167014	0.00249963	0.00266927	0.00505141	0.00439371	0.00345506
184	L-lactate dehydrogenase B chain OS=Homo sapiens GN=LDHB PE=1 SV=2	LDHB_HUMAN	37	5.93	Homo Sapiens	2	5	2	6	5	6	3	3	2	2	3	2	4	4	3	0.0540541	0.135135	0.0540541	0.162162	0.135135	0.162162	0.0810811	0.0810811	0.0540541	0.0540541	0.0810811	0.0540541	0.108108	0.108108	0.0810811	0.000988722	0.00257818	0.00102043	0.00220949	0.00177956	0.00211685	0.00146567	0.00155012	0.00102917	0.000513438	0.000771022	0.000555851	0.00135374	0.00125239
185	Ig kappa chain V-I region AG OS=Homo sapiens PE=1 SV=1	KV101_HUMAN	12	5.77	Homo Sapiens	0	0	0	0	0	0	0	0	0	0	0	3	3	0	0	0	0	0	0	0	0	0	0	0	0	0	0.25	0.25	0	0	0	0	0	0	0	0	0	0	0	0	0	0.00257081	0.00313052	0
186	Zinc-alpha-2-glycoprotein OS=Homo sapiens GN=AZGP1 PE=1 SV=2	ZA2G_HUMAN	34	5.92	Homo Sapiens	0	0	0	0	2	2	0	0	0	4	2	4	3	2	3	0	0	0	0	0.0588235	0.0588235	0	0	0	0.117647	0.0588235	0.117647	0.0882353	0.0588235	0.0882353	0	0	0	0	0.000774632	0.000767876	0	0	0	0.00111748	0.000559369	0.00120979	0.00110489	0.000681448
187	Alpha-enolase OS=Homo sapiens GN=ENO1 PE=1 SV=2	ENOA_HUMAN	47	7.46	Homo Sapiens	5	4	4	5	8	5	0	2	0	5	4	2	3	3	2	0.106383	0.0851064	0.0851064	0.106383	0.170213	0.106383	0	0.0425532	0	0.106383	0.0851064	0.0425532	0.0638298	0.0638298	0.0425532	0.00194589	0.00162371	0.00160663	0.00144949	0.00224149	0.00138871	0	0.000813538	0	0.00101049	0.000809299	0.000437584	0.000799282	0.000739443
188	Adenylyl cyclase-associated protein 1 OS=Homo sapiens GN=CAP1 PE=1 SV=5	CAP1_HUMAN	52	8.2	Homo Sapiens	3	5	4	6	5	4	3	0	0	5	8	5	6	8	5	0.0576923	0.0961538	0.0769231	0.115385	0.0961538	0.0769231	0.0576923	0	0	0.0961538	0.153846	0.0961538	0.115385	0.153846	0.0961538	0.00105527	0.00183448	0.00145215	0.00157214	0.00126622	0.00100415	0.00104288	0	0	0.000913327	0.00146296	0.000988773	0.00144486	0.00178225
189	Serum amyloid P-component OS=Homo sapiens GN=APCS PE=1 SV=2	SAMP_HUMAN	25	6.52	Homo Sapiens	0	0	0	0	0	0	0	0	0	0	3	2	0	3	4	0	0	0	0	0	0	0	0	0	0	0.12	0.08	0	0.12	0.16	0	0	0	0	0	0	0	0	0	0	0.00114111	0.000822659	0	0.00139015
190	Isocitrate dehydrogenase [NADP], mitochondrial OS=Homo sapiens GN=IDH2 PE=1 SV=2	IDHP_HUMAN	51	8.95	Homo Sapiens	2	2	2	8	8	9	0	0	0	11	14	7	9	10	8	0.0392157	0.0392157	0.0392157	0.156863	0.156863	0.176471	0	0	0	0.215686	0.27451	0.137255	0.176471	0.196078	0.156863	0.000717308	0.000748179	0.000740311	0.00213728	0.00206568	0.00230363	0	0	0	0.00204872	0.00261039	0.00141142	0.00220978	0.00227149
191	Collagen alpha-3(VI) chain OS=Homo sapiens GN=COL6A3 PE=1 SV=5	CO6A3_HUMAN	344	6.65	Homo Sapiens	0	0	0	0	0	0	0	0	0	0	4	0	0	0	0	0	0	0	0	0	0	0	0	0	0	0.0116279	0	0	0	0	0	0	0	0	0	0	0	0	0	0	0.000110573	0	0	0
192	Kallistatin OS=Homo sapiens GN=SERPINA4 PE=1 SV=3	KAIN_HUMAN	49	7.85	Homo Sapiens	0	0	0	0	0	0	0	0	0	12	10	8	7	9	8	0	0	0	0	0	0	0	0	0	0.244898	0.204082	0.163265	0.142857	0.183673	0.163265	0	0	0	0	0	0	0	0	0	0.00232619	0.00194067	0.0016789	0.00178887	0.00212779
193	Coagulation factor XI OS=Homo sapiens GN=F11 PE=1 SV=1	FA11_HUMAN	70	8.14	Homo Sapiens	0	0	0	2	0	4	0	2	0	14	18	10	9	12	16	0	0	0	0.0285714	0	0.0571429	0	0.0285714	0	0.2	0.257143	0.142857	0.128571	0.171429	0.228571	0	0	0	0.000389291	0	0.000745936	0	0.000546232	0	0.00189972	0.00244524	0.00146903	0.00160998	0.00198593
194	Histone H2B type 1-C/E/F/G/I OS=Homo sapiens GN=HIST1H2BC PE=1 SV=4	H2B1C_HUMAN	14	11	Homo Sapiens	3	0	3	2	4	2	2	0	0	0	2	0	0	0	0	0.214286	0	0.214286	0.142857	0.285714	0.142857	0.142857	0	0	0	0.142857	0	0	0	0	0.00391957	0	0.00404527	0.00194645	0.0037625	0.00186484	0.00258237	0	0	0	0.00135847	0	0	0
195	C4b-binding protein beta chain OS=Homo sapiens GN=C4BPB PE=1 SV=1	C4BPB_HUMAN	28	4.8	Homo Sapiens	3	0	2	2	2	2	2	2	2	3	2	2	0	0	2	0.107143	0	0.0714286	0.0714286	0.0714286	0.0714286	0.0714286	0.0714286	0.0714286	0.107143	0.0714286	0.0714286	0	0	0.0714286	0.00195979	0	0.00134842	0.000973227	0.000940624	0.000932421	0.00129119	0.00136558	0.00135997	0.00101771	0.000679233	0.000734517	0	0
196	LIM and senescent cell antigen-like-containing domain protein 1 OS=Homo sapiens GN=LIMS1 PE=1 SV=4	LIMS1_HUMAN	37	8.08	Homo Sapiens	2	2	2	2	0	0	0	0	0	3	4	2	0	4	0	0.0540541	0.0540541	0.0540541	0.0540541	0	0	0	0	0	0.0810811	0.108108	0.0540541	0	0.108108	0	0.000988722	0.00103127	0.00102043	0.000736496	0	0	0	0	0	0.000770157	0.00102803	0.000555851	0	0.00125239
197	Solute carrier family 2, facilitated glucose transporter member 1 OS=Homo sapiens GN=SLC2A1 PE=1 SV=2	GTR1_HUMAN	54	8.92	Homo Sapiens	0	0	0	2	3	3	0	0	0	0	0	0	2	2	0	0	0	0	0.037037	0.0555556	0.0555556	0	0	0	0	0	0	0.037037	0.037037	0	0	0	0	0.000504636	0.000731597	0.000725216	0	0	0	0	0	0	0.000463781	0.00042906
198	Platelet glycoprotein 4 OS=Homo sapiens GN=CD36 PE=1 SV=2	CD36_HUMAN	53	8.06	Homo Sapiens	0	2	0	4	3	3	0	0	0	5	6	4	3	4	5	0	0.0377358	0	0.0754717	0.0566038	0.0566038	0	0	0	0.0943396	0.113208	0.0754717	0.0566038	0.0754717	0.0943396	0	0.000719946	0	0.00102832	0.0007454	0.000738899	0	0	0	0.000896094	0.00107652	0.000776093	0.000708797	0.00087431
199	C-reactive protein OS=Homo sapiens GN=CRP PE=1 SV=1	CRP_HUMAN	25	5.32	Homo Sapiens	0	0	0	0	0	0	0	0	0	3	0	3	3	3	3	0	0	0	0	0	0	0	0	0	0.12	0	0.12	0.12	0.12	0.12	0	0	0	0	0	0	0	0	0	0.00113983	0	0.00123399	0.00150265	0.00139015
200	Protein S100-A8 OS=Homo sapiens GN=S100A8 PE=1 SV=1	S10A8_HUMAN	11	7.07	Homo Sapiens	0	0	0	2	0	0	0	0	0	3	0	3	4	5	2	0	0	0	0.181818	0	0	0	0	0	0.272727	0	0.272727	0.363636	0.454545	0.181818	0	0	0	0.0024773	0	0	0	0	0	0.00259053	0	0.00280452	0.00455349	0.00526573
201	HLA class I histocompatibility antigen, B-55 alpha chain OS=Homo sapiens GN=HLA-B PE=1 SV=1	1B55_HUMAN	40	5.85	Homo Sapiens	0	4	0	4	5	4	0	0	0	7	10	10	7	8	9	0	0.1	0	0.1	0.125	0.1	0	0	0	0.175	0.25	0.25	0.175	0.2	0.225	0	0.00190786	0	0.00136252	0.00164609	0.00130539	0	0	0	0.00166226	0.00237732	0.00257081	0.00219136	0.00231692
202	Actin, alpha cardiac muscle 1 OS=Homo sapiens GN=ACTC1 PE=1 SV=1	ACTC_HUMAN	42	5.05	Homo Sapiens	39	0	42	28	25	27	29	26	0	22	19	24	0	0	0	0.928571	0	1	0.666667	0.595238	0.642857	0.690476	0.619048	0	0.52381	0.452381	0.571429	0	0	0	0.0169848	0	0.0188779	0.00908345	0.00783853	0.00839179	0.0124815	0.011835	0	0.00497546	0.00430181	0.00587613	0	0
203	Ig gamma-4 chain C region OS=Homo sapiens GN=IGHG4 PE=1 SV=1	IGHG4_HUMAN	36	7.41	Homo Sapiens	0	0	0	0	0	24	0	0	0	25	22	0	0	0	18	0	0	0	0	0	0.666667	0	0	0	0.694444	0.611111	0	0	0	0.5	0	0	0	0	0	0.00870259	0	0	0	0.00659625	0.00581122	0	0	0
204	Hyaluronan-binding protein 2 OS=Homo sapiens GN=HABP2 PE=1 SV=1	HABP2_HUMAN	63	6.52	Homo Sapiens	0	0	0	0	0	0	0	0	0	0	0	0	0	0	0	0	0	0	0	0	0	0	0	0	0	0	0	0	0	0	0	0	0	0	0	0	0	0	0	0	0	0	0	0
205	Solute carrier family 2, facilitated glucose transporter member 3 OS=Homo sapiens GN=SLC2A3 PE=2 SV=1	GTR3_HUMAN	54	7.24	Homo Sapiens	2	0	2	2	2	2	2	0	0	7	7	7	6	5	8	0.037037	0	0.037037	0.037037	0.037037	0.037037	0.037037	0	0	0.12963	0.12963	0.12963	0.111111	0.0925926	0.148148	0.000677457	0	0.000699182	0.000504636	0.000487731	0.000483477	0.000669505	0	0	0.0012313	0.00123268	0.00133301	0.00139134	0.00107265
206	Dermcidin OS=Homo sapiens GN=DCD PE=1 SV=2	DCD_HUMAN	11	6.52	Homo Sapiens	4	3	4	3	2	2	3	3	2	6	6	5	3	4	4	0.363636	0.272727	0.363636	0.272727	0.181818	0.181818	0.272727	0.272727	0.181818	0.545455	0.545455	0.454545	0.272727	0.363636	0.363636	0.0066514	0.00520325	0.0068647	0.00371596	0.00239432	0.00237343	0.00492999	0.00521404	0.00346174	0.00518106	0.00518687	0.0046742	0.00341511	0.00421259
207	Tubulin alpha-4A chain OS=Homo sapiens GN=TUBA4A PE=1 SV=1	TBA4A_HUMAN	50	4.69	Homo Sapiens	5	8	0	0	0	11	0	0	3	12	16	14	14	13	14	0.1	0.16	0	0	0	0.22	0	0	0.06	0.24	0.32	0.28	0.28	0.26	0.28	0.00182913	0.00305257	0	0	0	0.00287186	0	0	0.00114238	0.00227966	0.00304297	0.00287931	0.00350618	0.003012
208	Ig heavy chain V-III region TIL OS=Homo sapiens PE=1 SV=1	HV304_HUMAN	12	9.4	Homo Sapiens	0	0	0	0	0	0	0	0	5	0	0	0	0	0	0	0	0	0	0	0	0	0	0	0.416667	0	0	0	0	0	0	0	0	0	0	0	0	0	0	0.00793316	0	0	0	0	0
209	Ig lambda chain V-III region LOI OS=Homo sapiens PE=1 SV=1	LV302_HUMAN	12	4.72	Homo Sapiens	0	0	0	0	0	0	0	0	0	0	0	0	0	0	0	0	0	0	0	0	0	0	0	0	0	0	0	0	0	0	0	0	0	0	0	0	0	0	0	0	0	0	0	0
210	Alpha-amylase 1 OS=Homo sapiens GN=AMY1A PE=1 SV=2	AMY1_HUMAN	58	6.92	Homo Sapiens	3	3	0	3	6	8	4	0	4	4	5	3	0	0	2	0.0517241	0.0517241	0	0.0517241	0.103448	0.137931	0.0689655	0	0.0689655	0.0689655	0.0862069	0.0517241	0	0	0.0344828	0.000946104	0.000986823	0	0.00070475	0.00136228	0.00180054	0.00124666	0	0.00131308	0.000655076	0.000819764	0.000531891	0	0
211	Integrin alpha-6 OS=Homo sapiens GN=ITGA6 PE=1 SV=5	ITA6_HUMAN	127	6.57	Homo Sapiens	0	3	0	2	3	3	0	2	0	7	9	9	7	7	7	0	0.023622	0	0.015748	0.023622	0.023622	0	0.015748	0	0.0551181	0.0708661	0.0708661	0.0551181	0.0551181	0.0551181	0	0.000450675	0	0.00021457	0.000311073	0.00030836	0	0.000301073	0	0.000523545	0.000673885	0.000728733	0.000690194	0.000638522
212	Platelet glycoprotein Ib alpha chain OS=Homo sapiens GN=GP1BA PE=1 SV=2	GP1BA_HUMAN	72	6.24	Homo Sapiens	0	0	2	2	3	3	0	0	0	4	5	7	5	7	6	0	0	0.0277778	0.0277778	0.0416667	0.0416667	0	0	0	0.0555556	0.0694444	0.0972222	0.0694444	0.0972222	0.0833333	0	0	0.000524387	0.000378477	0.000548697	0.000543912	0	0	0	0.0005277	0.000660366	0.000999759	0.000869589	0.00112628
213	Suprabasin OS=Homo sapiens GN=SBSN PE=1 SV=2	SBSN_HUMAN	61	7.01	Homo Sapiens	2	2	0	2	2	2	0	0	0	9	5	5	3	4	4	0.0327869	0.0327869	0	0.0327869	0.0327869	0.0327869	0	0	0	0.147541	0.0819672	0.0819672	0.0491803	0.0655738	0.0655738	0.000599716	0.000625527	0	0.000446727	0.000431762	0.000427996	0	0	0	0.00140143	0.000779448	0.000842888	0.00061584	0.000759647
214	Erythrocyte membrane protein band 4.2 OS=Homo sapiens GN=EPB42 PE=1 SV=3	EPB42_HUMAN	77	8.17	Homo Sapiens	0	0	0	0	0	0	0	0	0	0	3	0	2	2	0	0	0	0	0	0	0	0	0	0	0	0.038961	0	0.025974	0.025974	0	0	0	0	0	0	0	0	0	0	0	0.000370491	0	0.000325249	0.000300899
215	ATP synthase subunit alpha, mitochondrial OS=Homo sapiens GN=ATP5A1 PE=1 SV=1	ATPA_HUMAN	60	9.56	Homo Sapiens	2	2	2	6	3	3	0	0	3	10	8	8	7	11	9	0.0333333	0.0333333	0.0333333	0.1	0.05	0.05	0	0	0.05	0.166667	0.133333	0.133333	0.116667	0.183333	0.15	0.000609712	0.000635952	0.000629264	0.00136252	0.000658437	0.000652694	0	0	0.00095198	0.0015831	0.0012679	0.0013711	0.00146091	0.00212385
216	Lysozyme C OS=Homo sapiens GN=LYZ PE=1 SV=1	LYSC_HUMAN	17	9.35	Homo Sapiens	2	0	2	2	0	3	2	2	2	4	2	2	2	2	0	0.117647	0	0.117647	0.117647	0	0.176471	0.117647	0.117647	0.117647	0.235294	0.117647	0.117647	0.117647	0.117647	0	0.00215192	0	0.00222093	0.00160296	0	0.00230363	0.00212666	0.00224919	0.00223995	0.00223497	0.00111874	0.00120979	0.00147319	0.0013629
217	Coagulation factor IX OS=Homo sapiens GN=F9 PE=1 SV=2	FA9_HUMAN	52	5.16	Homo Sapiens	0	0	0	0	0	0	0	0	0	0	0	0	0	0	0	0	0	0	0	0	0	0	0	0	0	0	0	0	0	0	0	0	0	0	0	0	0	0	0	0	0	0	0	0
218	Platelet endothelial cell adhesion molecule OS=Homo sapiens GN=PECAM1 PE=1 SV=1	PECA1_HUMAN	83	6.99	Homo Sapiens	0	2	0	6	5	5	0	0	0	8	15	11	3	6	7	0	0.0240964	0	0.0722892	0.060241	0.060241	0	0	0	0.0963855	0.180723	0.13253	0.0361446	0.0722892	0.0843373	0	0.000459725	0	0.000984952	0.000793297	0.000786379	0	0	0	0.000915528	0.00171854	0.00136284	0.000452605	0.000837442
219	Filaggrin OS=Homo sapiens GN=FLG PE=1 SV=3	FILA_HUMAN	435	9.6	Homo Sapiens	0	0	2	2	2	3	0	0	0	10	12	4	4	5	4	0	0	0.0045977	0.0045977	0.0045977	0.00689655	0	0	0	0.0229885	0.0275862	0.0091954	0.0091954	0.0114943	0.0091954	0	0	8.6795e-05	6.26445e-05	6.05459e-05	9.00268e-05	0	0	0	0.000218359	0.000262325	9.45585e-05	0.000115146	0.000133156
220	Platelet glycoprotein Ib beta chain OS=Homo sapiens GN=GP1BB PE=1 SV=1	GP1BB_HUMAN	22	9.37	Homo Sapiens	2	3	5	2	3	3	4	3	4	0	2	0	0	2	2	0.0909091	0.136364	0.227273	0.0909091	0.136364	0.136364	0.181818	0.136364	0.181818	0	0.0909091	0	0	0.0909091	0.0909091	0.00166285	0.00260162	0.00429044	0.00123865	0.00179574	0.00178008	0.00328666	0.00260702	0.00346174	0	0.000864479	0	0	0.00105315
221	Desmocollin-1 OS=Homo sapiens GN=DSC1 PE=1 SV=2	DSC1_HUMAN	100	5.08	Homo Sapiens	0	0	0	2	3	4	3	0	0	7	9	3	4	5	3	0	0	0	0.02	0.03	0.04	0.03	0	0	0.07	0.09	0.03	0.04	0.05	0.03	0	0	0	0.000272504	0.000395062	0.000522156	0.000542299	0	0	0.000664902	0.000855834	0.000308497	0.000500883	0.000579231
222	78 kDa glucose-regulated protein OS=Homo sapiens GN=HSPA5 PE=1 SV=2	GRP78_HUMAN	72	4.8	Homo Sapiens	3	3	3	4	4	4	4	4	3	6	5	5	5	5	2	0.0416667	0.0416667	0.0416667	0.0555556	0.0555556	0.0555556	0.0555556	0.0555556	0.0416667	0.0833333	0.0694444	0.0694444	0.0694444	0.0694444	0.0277778	0.00076214	0.00079494	0.00078658	0.000756954	0.000731597	0.000725216	0.00100426	0.00106212	0.000793316	0.00079155	0.000660366	0.000714114	0.000869589	0.000804487
223	Integrin alpha-M OS=Homo sapiens GN=ITGAM PE=1 SV=2	ITAM_HUMAN	127	7.24	Homo Sapiens	0	0	0	0	0	0	0	0	0	0	0	0	0	0	0	0	0	0	0	0	0	0	0	0	0	0	0	0	0	0	0	0	0	0	0	0	0	0	0	0	0	0	0	0
224	Coronin-1C OS=Homo sapiens GN=CORO1C PE=1 SV=1	COR1C_HUMAN	53	7.09	Homo Sapiens	0	2	0	0	2	0	0	0	0	5	6	3	3	4	2	0	0.0377358	0	0	0.0377358	0	0	0	0	0.0943396	0.113208	0.0566038	0.0566038	0.0754717	0.0377358	0	0.000719946	0	0	0.000496933	0	0	0	0	0.000896094	0.00107652	0.00058207	0.000708797	0.00087431
225	Myosin regulatory light chain 12A OS=Homo sapiens GN=MYL12A PE=1 SV=2	ML12A_HUMAN	20	4.4	Homo Sapiens	2	0	0	4	5	4	0	0	0	14	12	11	9	9	10	0.1	0	0	0.2	0.25	0.2	0	0	0	0.7	0.6	0.55	0.45	0.45	0.5	0.00182913	0	0	0.00272504	0.00329218	0.00261078	0	0	0	0.00664902	0.00570556	0.00565578	0.00563494	0.00521308
226	Phosphatidylinositol-glycan-specific phospholipase D OS=Homo sapiens GN=GPLD1 PE=1 SV=3	PHLD_HUMAN	92	6.33	Homo Sapiens	0	0	0	0	0	0	0	0	0	0	0	0	0	0	0	0	0	0	0	0	0	0	0	0	0	0	0	0	0	0	0	0	0	0	0	0	0	0	0	0	0	0	0	0
227	Catalase OS=Homo sapiens GN=CAT PE=1 SV=3	CATA_HUMAN	60	7.41	Homo Sapiens	0	0	0	2	2	2	0	0	0	2	0	2	3	0	0	0	0	0	0.0333333	0.0333333	0.0333333	0	0	0	0.0333333	0	0.0333333	0.05	0	0	0	0	0	0.000454173	0.000438958	0.00043513	0	0	0	0.00031662	0	0.000342775	0.000626104	0
228	Endoplasmin OS=Homo sapiens GN=HSP90B1 PE=1 SV=1	ENPL_HUMAN	92	4.48	Homo Sapiens	0	2	0	2	5	3	0	0	0	2	2	3	2	4	2	0	0.0217391	0	0.0217391	0.0543478	0.0326087	0	0	0	0.0217391	0.0217391	0.0326087	0.0217391	0.0434783	0.0217391	0	0.000414751	0	0.000296199	0.000715692	0.00042567	0	0	0	0.000206491	0.000206723	0.000335323	0.000272219	0.000503679
229	Zyxin OS=Homo sapiens GN=ZYX PE=1 SV=1	ZYX_HUMAN	61	6.65	Homo Sapiens	0	0	0	2	2	4	0	0	0	2	2	3	0	2	0	0	0	0	0.0327869	0.0327869	0.0655738	0	0	0	0.0327869	0.0327869	0.0491803	0	0.0327869	0	0	0	0	0.000446727	0.000431762	0.000855993	0	0	0	0.00031143	0.000311779	0.000505733	0	0.000379823
230	Ig kappa chain V-IV region B17 OS=Homo sapiens PE=2 SV=1	KV404_HUMAN	15	6.51	Homo Sapiens	3	0	0	3	2	2	0	0	0	2	0	2	3	0	5	0.2	0	0	0.2	0.133333	0.133333	0	0	0	0.133333	0	0.133333	0.2	0	0.333333	0.00365827	0	0	0.00272504	0.00175583	0.00174052	0	0	0	0.00126648	0	0.0013711	0.00250442	0
231	Histone H2A type 2-A OS=Homo sapiens GN=HIST2H2AA3 PE=1 SV=3	H2A2A_HUMAN	14	11.55	Homo Sapiens	0	0	0	2	0	0	0	0	0	0	0	0	0	0	0	0	0	0	0.142857	0	0	0	0	0	0	0	0	0	0	0	0	0	0	0.00194645	0	0	0	0	0	0	0	0	0	0
232	Ig heavy chain V-III region TRO OS=Homo sapiens PE=1 SV=1	HV301_HUMAN	13	10	Homo Sapiens	0	0	0	2	0	0	0	0	0	0	0	0	0	0	0	0	0	0	0.153846	0	0	0	0	0	0	0	0	0	0	0	0	0	0	0.00209618	0	0	0	0	0	0	0	0	0	0
233	Carboxypeptidase N catalytic chain OS=Homo sapiens GN=CPN1 PE=1 SV=1	CBPN_HUMAN	52	7.36	Homo Sapiens	0	0	0	0	0	0	0	0	0	0	0	0	0	0	0	0	0	0	0	0	0	0	0	0	0	0	0	0	0	0	0	0	0	0	0	0	0	0	0	0	0	0	0	0
234	Ig mu heavy chain disease protein OS=Homo sapiens PE=1 SV=1	MUCB_HUMAN	43	4.89	Homo Sapiens	0	0	0	48	50	51	0	0	0	0	0	0	0	0	0	0	0	0	1.11628	1.16279	1.18605	0	0	0	0	0	0	0	0	0	0	0	0	0.0152095	0.0153125	0.0154825	0	0	0	0	0	0	0	0
235	Ig lambda chain V-I region HA OS=Homo sapiens PE=1 SV=1	LV102_HUMAN	12	9.12	Homo Sapiens	0	0	0	0	0	0	0	0	0	2	0	0	0	0	0	0	0	0	0	0	0	0	0	0	0.166667	0	0	0	0	0	0	0	0	0	0	0	0	0	0	0.0015831	0	0	0	0
236	Ig heavy chain V-III region GAL OS=Homo sapiens PE=1 SV=1	HV320_HUMAN	13	8.7	Homo Sapiens	0	0	0	3	2	2	2	0	0	0	0	3	2	4	2	0	0	0	0.230769	0.153846	0.153846	0.153846	0	0	0	0	0.230769	0.153846	0.307692	0.153846	0	0	0	0.00314427	0.00202596	0.00200829	0.00278102	0	0	0	0	0.00237305	0.00192647	0.0035645
237	Apolipoprotein A-V OS=Homo sapiens GN=APOA5 PE=1 SV=1	APOA5_HUMAN	41	6.4	Homo Sapiens	2	2	0	2	0	0	0	0	0	2	2	0	0	0	2	0.0487805	0.0487805	0	0.0487805	0	0	0	0	0	0.0487805	0.0487805	0	0	0	0.0487805	0.000892261	0.000930662	0	0.000664643	0	0	0	0	0	0.000463346	0.000463867	0	0	0
238	CD9 antigen OS=Homo sapiens GN=CD9 PE=1 SV=4	CD9_HUMAN	25	7.19	Homo Sapiens	0	2	0	0	2	2	2	0	0	2	2	0	0	0	0	0	0.08	0	0	0.08	0.08	0.08	0	0	0.08	0.08	0	0	0	0	0	0.00152629	0	0	0.0010535	0.00104431	0.00144613	0	0	0.000759888	0.000760741	0	0	0
239	Ig heavy chain V-III region BUT OS=Homo sapiens PE=1 SV=1	HV306_HUMAN	12	9.48	Homo Sapiens	0	0	0	0	0	0	0	0	0	2	2	2	2	0	2	0	0	0	0	0	0	0	0	0	0.166667	0.166667	0.166667	0.166667	0	0.166667	0	0	0	0	0	0	0	0	0	0.0015831	0.00158488	0.00171387	0.00208701	0
240	Beta-parvin OS=Homo sapiens GN=PARVB PE=1 SV=1	PARVB_HUMAN	42	6.72	Homo Sapiens	0	0	0	2	0	2	0	0	0	6	5	6	4	4	5	0	0	0	0.047619	0	0.047619	0	0	0	0.142857	0.119048	0.142857	0.0952381	0.0952381	0.119048	0	0	0	0.000648818	0	0.000621614	0	0	0	0.00135694	0.00113206	0.00146903	0.00119258	0.0011033
241	Prenylcysteine oxidase 1 OS=Homo sapiens GN=PCYOX1 PE=1 SV=3	PCYOX_HUMAN	57	6.1	Homo Sapiens	0	0	0	0	0	0	0	0	0	0	0	0	0	0	0	0	0	0	0	0	0	0	0	0	0	0	0	0	0	0	0	0	0	0	0	0	0	0	0	0	0	0	0	0
242	Vasodilator-stimulated phosphoprotein OS=Homo sapiens GN=VASP PE=1 SV=3	VASP_HUMAN	40	9.41	Homo Sapiens	0	0	0	0	0	0	0	0	0	0	0	0	0	0	0	0	0	0	0	0	0	0	0	0	0	0	0	0	0	0	0	0	0	0	0	0	0	0	0	0	0	0	0	0
243	14-3-3 protein epsilon OS=Homo sapiens GN=YWHAE PE=1 SV=1	1433E_HUMAN	29	4.36	Homo Sapiens	3	2	0	5	6	6	0	0	0	9	6	5	3	0	2	0.103448	0.0689655	0	0.172414	0.206897	0.206897	0	0	0	0.310345	0.206897	0.172414	0.103448	0	0.0689655	0.00189221	0.00131576	0	0.00234917	0.00272457	0.0027008	0	0	0	0.00294784	0.00196743	0.00177297	0.00129539	0
244	Selenoprotein P OS=Homo sapiens GN=SEPP1 PE=1 SV=3	SEPP1_HUMAN	43	7.92	Homo Sapiens	0	0	0	2	2	0	0	0	0	4	2	3	0	3	3	0	0	0	0.0465116	0.0465116	0	0	0	0	0.0930233	0.0465116	0.0697674	0	0.0697674	0.0697674	0	0	0	0.000633729	0.000612499	0	0	0	0	0.000883591	0.000442291	0.000717435	0	0.000808229
245	Calnexin OS=Homo sapiens GN=CANX PE=1 SV=2	CALX_HUMAN	68	4.21	Homo Sapiens	2	2	2	3	2	2	0	0	0	5	7	5	6	7	8	0.0294118	0.0294118	0.0294118	0.0441176	0.0294118	0.0294118	0	0	0	0.0735294	0.102941	0.0735294	0.0882353	0.102941	0.117647	0.000537981	0.000561134	0.000555233	0.000601111	0.000387316	0.000383938	0	0	0	0.000698427	0.000978895	0.00075612	0.00110489	0.00119253
246	Calmodulin-like protein 5 OS=Homo sapiens GN=CALML5 PE=1 SV=2	CALL5_HUMAN	16	4.05	Homo Sapiens	2	2	2	2	3	2	0	3	2	2	4	3	2	3	2	0.125	0.125	0.125	0.125	0.1875	0.125	0	0.1875	0.125	0.125	0.25	0.1875	0.125	0.1875	0.125	0.00228642	0.00238482	0.00235974	0.00170315	0.00246914	0.00163174	0	0.00358465	0.00237995	0.00118733	0.00237732	0.00192811	0.00156526	0.00217211
247	Sex hormone-binding globulin OS=Homo sapiens GN=SHBG PE=1 SV=2	SHBG_HUMAN	44	6.7	Homo Sapiens	0	0	0	0	0	0	0	0	0	2	4	0	0	0	2	0	0	0	0	0	0	0	0	0	0.0454545	0.0909091	0	0	0	0.0454545	0	0	0	0	0	0	0	0	0	0.000431755	0.000864479	0	0	0
248	Carboxypeptidase B2 OS=Homo sapiens GN=CPB2 PE=1 SV=2	CBPB2_HUMAN	48	7.77	Homo Sapiens	0	0	0	0	0	0	0	0	0	2	2	0	0	0	0	0	0	0	0	0	0	0	0	0	0.0416667	0.0416667	0	0	0	0	0	0	0	0	0	0	0	0	0	0.000395775	0.000396219	0	0	0
249	14-3-3 protein eta OS=Homo sapiens GN=YWHAH PE=1 SV=4	1433F_HUMAN	28	4.47	Homo Sapiens	0	0	0	0	0	4	2	3	0	4	4	0	2	3	2	0	0	0	0	0	0.142857	0.0714286	0.107143	0	0.142857	0.142857	0	0.0714286	0.107143	0.0714286	0	0	0	0	0	0.00186484	0.00129119	0.00204837	0	0.00135694	0.00135847	0	0.000894435	0.00124121
250	Carboxypeptidase N subunit 2 OS=Homo sapiens GN=CPN2 PE=1 SV=3	CPN2_HUMAN	61	5.89	Homo Sapiens	0	0	0	0	0	0	0	0	0	4	4	0	3	0	0	0	0	0	0	0	0	0	0	0	0.0655738	0.0655738	0	0.0491803	0	0	0	0	0	0	0	0	0	0	0	0.000622859	0.000623558	0	0.00061584	0
251	Thymosin beta-4 OS=Homo sapiens GN=TMSB4X PE=1 SV=2	TYB4_HUMAN	5	4.72	Homo Sapiens	4	3	3	2	0	2	0	2	2	2	2	2	2	2	0	0.8	0.6	0.6	0.4	0	0.4	0	0.4	0.4	0.4	0.4	0.4	0.4	0.4	0	0.0146331	0.0114471	0.0113268	0.00545007	0	0.00522156	0	0.00764725	0.00761584	0.00379944	0.00380371	0.00411329	0.00500883	0.00463385
252	Junctional adhesion molecule A OS=Homo sapiens GN=F11R PE=1 SV=1	JAM1_HUMAN	33	8.02	Homo Sapiens	2	0	2	4	2	4	2	2	0	2	0	3	2	2	3	0.0606061	0	0.0606061	0.121212	0.0606061	0.121212	0.0606061	0.0606061	0	0.0606061	0	0.0909091	0.0606061	0.0606061	0.0909091	0.00110857	0	0.00114412	0.00165154	0.000798105	0.00158229	0.00109555	0.00115867	0	0.000575673	0	0.00093484	0.000758914	0.000702098
253	Triosephosphate isomerase OS=Homo sapiens GN=TPI1 PE=1 SV=3	TPIS_HUMAN	31	5.72	Homo Sapiens	0	3	0	3	3	3	0	0	2	2	3	3	3	2	2	0	0.0967742	0	0.0967742	0.0967742	0.0967742	0	0	0.0645161	0.0645161	0.0967742	0.0967742	0.0967742	0.0645161	0.0645161	0	0.00184631	0	0.00131857	0.00127439	0.00126328	0	0	0.00122836	0.000612813	0.000920252	0.000995152	0.00121181	0.000747394
254	Protein disulfide-isomerase A3 OS=Homo sapiens GN=PDIA3 PE=1 SV=4	PDIA3_HUMAN	57	6.28	Homo Sapiens	3	5	2	0	0	2	0	0	0	0	4	3	0	3	4	0.0526316	0.0877193	0.0350877	0	0	0.0350877	0	0	0	0	0.0701754	0.0526316	0	0.0526316	0.0701754	0.000962703	0.00167356	0.000662383	0	0	0.000458031	0	0	0	0	0.000667317	0.000541223	0	0.000609716
255	Integrin beta-2 OS=Homo sapiens GN=ITGB2 PE=1 SV=2	ITB2_HUMAN	85	6.94	Homo Sapiens	0	0	0	0	0	0	0	0	0	0	0	0	0	0	0	0	0	0	0	0	0	0	0	0	0	0	0	0	0	0	0	0	0	0	0	0	0	0	0	0	0	0	0	0
256	Actin-related protein 3 OS=Homo sapiens GN=ACTR3 PE=1 SV=3	ARP3_HUMAN	47	5.69	Homo Sapiens	0	0	0	4	3	2	0	0	0	4	3	2	3	4	3	0	0	0	0.0851064	0.0638298	0.0425532	0	0	0	0.0851064	0.0638298	0.0425532	0.0638298	0.0851064	0.0638298	0	0	0	0.00115959	0.000840558	0.000555485	0	0	0	0.000808392	0.000606974	0.000437584	0.000799282	0.000985925
257	Tropomyosin alpha-3 chain OS=Homo sapiens GN=TPM3 PE=1 SV=2	TPM3_HUMAN	33	4.38	Homo Sapiens	8	0	0	8	7	0	0	0	0	9	7	10	8	8	9	0.242424	0	0	0.242424	0.212121	0	0	0	0	0.272727	0.212121	0.30303	0.242424	0.242424	0.272727	0.00443427	0	0	0.00330307	0.00279337	0	0	0	0	0.00259053	0.00201712	0.00311613	0.00303566	0.00280839
258	Superoxide dismutase [Mn], mitochondrial OS=Homo sapiens GN=SOD2 PE=1 SV=2	SODM_HUMAN	25	8.45	Homo Sapiens	0	0	0	4	0	2	0	0	0	5	5	3	4	5	3	0	0	0	0.16	0	0.08	0	0	0	0.2	0.2	0.12	0.16	0.2	0.12	0	0	0	0.00218003	0	0.00104431	0	0	0	0.00189972	0.00190185	0.00123399	0.00200353	0.00231692
259	Kinesin-like protein KIF20B OS=Homo sapiens GN=KIF20B PE=1 SV=3	KI20B_HUMAN	211	5.37	Homo Sapiens	0	0	0	0	0	0	0	0	0	0	0	0	0	0	0	0	0	0	0	0	0	0	0	0	0	0	0	0	0	0	0	0	0	0	0	0	0	0	0	0	0	0	0	0
260	Heat shock protein HSP 90-alpha OS=Homo sapiens GN=HSP90AA1 PE=1 SV=5	HS90A_HUMAN	85	4.66	Homo Sapiens	0	0	0	2	0	3	0	0	0	3	5	2	2	0	3	0	0	0	0.0235294	0	0.0352941	0	0	0	0.0352941	0.0588235	0.0235294	0.0235294	0	0.0352941	0	0	0	0.000320592	0	0.000460725	0	0	0	0.000335245	0.000559369	0.000241958	0.000294637	0
261	Guanine nucleotide-binding protein G(I)/G(S)/G(T) subunit beta-1 OS=Homo sapiens GN=GNB1 PE=1 SV=3	GBB1_HUMAN	37	5.85	Homo Sapiens	0	0	0	2	4	4	0	0	0	2	2	0	0	4	0	0	0	0	0.0540541	0.108108	0.108108	0	0	0	0.0540541	0.0540541	0	0	0.108108	0	0	0	0	0.000736496	0.00142365	0.00141123	0	0	0	0.000513438	0.000514014	0	0	0.00125239
262	Transgelin-2 OS=Homo sapiens GN=TAGLN2 PE=1 SV=3	TAGL2_HUMAN	22	8.45	Homo Sapiens	0	0	0	0	2	2	0	0	0	2	2	3	0	5	4	0	0	0	0	0.0909091	0.0909091	0	0	0	0.0909091	0.0909091	0.136364	0	0.227273	0.181818	0	0	0	0	0.00119716	0.00118672	0	0	0	0.000863509	0.000864479	0.00140226	0	0.00263287
263	P-selectin OS=Homo sapiens GN=SELP PE=1 SV=3	LYAM3_HUMAN	91	6.57	Homo Sapiens	0	2	2	3	3	2	0	0	0	4	6	7	5	4	6	0	0.021978	0.021978	0.032967	0.032967	0.021978	0	0	0	0.043956	0.0659341	0.0769231	0.0549451	0.043956	0.0659341	0	0.000419309	0.000414899	0.000449182	0.000434134	0.000286899	0	0	0	0.000417521	0.000626985	0.000791018	0.000688027	0.000509214
264	Adipocyte plasma membrane-associated protein OS=Homo sapiens GN=APMAP PE=1 SV=2	APMAP_HUMAN	46	6.02	Homo Sapiens	0	0	0	0	0	0	0	0	0	0	0	0	0	0	0	0	0	0	0	0	0	0	0	0	0	0	0	0	0	0	0	0	0	0	0	0	0	0	0	0	0	0	0	0
265	L-lactate dehydrogenase A chain OS=Homo sapiens GN=LDHA PE=1 SV=2	LDHA_HUMAN	37	8.45	Homo Sapiens	0	3	0	0	3	3	0	0	0	0	0	0	0	0	0	0	0.0810811	0	0	0.0810811	0.0810811	0	0	0	0	0	0	0	0	0	0	0.00154691	0	0	0.00106774	0.00105842	0	0	0	0	0	0	0	0
266	Serum deprivation-response protein OS=Homo sapiens GN=SDPR PE=1 SV=3	SDPR_HUMAN	47	4.88	Homo Sapiens	0	0	0	0	0	0	0	0	0	3	4	2	2	5	5	0	0	0	0	0	0	0	0	0	0.0638298	0.0851064	0.0425532	0.0425532	0.106383	0.106383	0	0	0	0	0	0	0	0	0	0.000606294	0.000809299	0.000437584	0.000532855	0.00123241
267	Prostaglandin G/H synthase 1 OS=Homo sapiens GN=PTGS1 PE=1 SV=2	PGH1_HUMAN	69	7.25	Homo Sapiens	2	4	2	2	2	0	0	3	0	3	5	5	2	3	5	0.0289855	0.057971	0.0289855	0.0289855	0.0289855	0	0	0.0434783	0	0.0434783	0.0724638	0.0724638	0.0289855	0.0434783	0.0724638	0.000530184	0.001106	0.000547186	0.000394933	0.000381703	0	0	0.000831223	0	0.000412983	0.000689077	0.000745162	0.000362959	0.000503679
268	Peroxiredoxin-2 OS=Homo sapiens GN=PRDX2 PE=1 SV=5	PRDX2_HUMAN	22	5.76	Homo Sapiens	2	0	0	0	0	0	0	0	0	2	0	0	2	0	0	0.0909091	0	0	0	0	0	0	0	0	0.0909091	0	0	0.0909091	0	0	0.00166285	0	0	0	0	0	0	0	0	0.000863509	0	0	0.00113837	0
269	Fetuin-B OS=Homo sapiens GN=FETUB PE=1 SV=2	FETUB_HUMAN	42	6.83	Homo Sapiens	0	0	0	0	0	0	0	0	0	3	4	3	3	4	3	0	0	0	0	0	0	0	0	0	0.0714286	0.0952381	0.0714286	0.0714286	0.0952381	0.0714286	0	0	0	0	0	0	0	0	0	0.000678472	0.000905644	0.000734517	0.000894435	0.0011033
270	Transforming protein RhoA OS=Homo sapiens GN=RHOA PE=1 SV=1	RHOA_HUMAN	22	5.89	Homo Sapiens	2	0	2	0	0	0	2	0	0	3	2	0	0	0	0	0.0909091	0	0.0909091	0	0	0	0.0909091	0	0	0.136364	0.0909091	0	0	0	0	0.00166285	0	0.00171617	0	0	0	0.00164333	0	0	0.00129526	0.000864479	0	0	0
271	Thromboxane-A synthase OS=Homo sapiens GN=TBXAS1 PE=1 SV=3	THAS_HUMAN	61	7.68	Homo Sapiens	0	2	0	5	4	4	0	0	0	8	5	5	5	5	6	0	0.0327869	0	0.0819672	0.0655738	0.0655738	0	0	0	0.131148	0.0819672	0.0819672	0.0819672	0.0819672	0.0983607	0	0.000625527	0	0.00111682	0.000863524	0.000855993	0	0	0	0.00124572	0.000779448	0.000842888	0.0010264	0.000949558
272	F-actin-capping protein subunit beta OS=Homo sapiens GN=CAPZB PE=1 SV=4	CAPZB_HUMAN	31	5.23	Homo Sapiens	0	0	0	0	0	2	0	0	0	6	5	7	5	3	5	0	0	0	0	0	0.0645161	0	0	0	0.193548	0.16129	0.225806	0.16129	0.0967742	0.16129	0	0	0	0	0	0.000842186	0	0	0	0.00183844	0.00153375	0.00232202	0.00201969	0.00112109
273	Keratin, type II cytoskeletal 6A OS=Homo sapiens GN=KRT6A PE=1 SV=3	K2C6A_HUMAN	60	8.16	Homo Sapiens	0	0	0	0	0	0	0	0	0	47	46	39	41	41	40	0	0	0	0	0	0	0	0	0	0.783333	0.766667	0.65	0.683333	0.683333	0.666667	0	0	0	0	0	0	0	0	0	0.00744057	0.00729044	0.0066841	0.00855676	0.00791615
274	Ig lambda chain V-III region SH OS=Homo sapiens PE=1 SV=1	LV301_HUMAN	11	6.5	Homo Sapiens	0	0	0	0	0	0	0	0	0	0	0	0	0	0	0	0	0	0	0	0	0	0	0	0	0	0	0	0	0	0	0	0	0	0	0	0	0	0	0	0	0	0	0	0
275	Ig lambda chain V-IV region Hil OS=Homo sapiens PE=1 SV=1	LV403_HUMAN	12	6.45	Homo Sapiens	0	0	0	0	0	0	0	0	0	0	2	0	0	0	2	0	0	0	0	0	0	0	0	0	0	0.166667	0	0	0	0.166667	0	0	0	0	0	0	0	0	0	0	0.00158488	0	0	0
276	Pigment epithelium-derived factor OS=Homo sapiens GN=SERPINF1 PE=1 SV=4	PEDF_HUMAN	46	6.33	Homo Sapiens	0	0	0	0	0	0	0	0	0	2	2	0	0	0	0	0	0	0	0	0	0	0	0	0	0.0434783	0.0434783	0	0	0	0	0	0	0	0	0	0	0	0	0	0.000412983	0.000413446	0	0	0
277	Ig kappa chain V-II region RPMI 6410 OS=Homo sapiens PE=4 SV=1	KV206_HUMAN	15	9.53	Homo Sapiens	0	0	0	0	0	0	0	0	0	0	0	0	0	0	0	0	0	0	0	0	0	0	0	0	0	0	0	0	0	0	0	0	0	0	0	0	0	0	0	0	0	0	0	0
278	Protein S100-A7 OS=Homo sapiens GN=S100A7 PE=1 SV=4	S10A7_HUMAN	11	6.78	Homo Sapiens	0	0	0	3	3	0	0	0	0	3	2	3	0	4	3	0	0	0	0.272727	0.272727	0	0	0	0	0.272727	0.181818	0.272727	0	0.363636	0.272727	0	0	0	0.00371596	0.00359147	0	0	0	0	0.00259053	0.00172896	0.00280452	0	0.00421259
279	HLA class I histocompatibility antigen, A-24 alpha chain OS=Homo sapiens GN=HLA-A PE=1 SV=2	1A24_HUMAN	41	6.29	Homo Sapiens	0	0	6	0	0	0	0	0	0	8	10	8	0	0	10	0	0	0.146341	0	0	0	0	0	0	0.195122	0.243902	0.195122	0	0	0.243902	0	0	0.00276262	0	0	0	0	0	0	0.00185339	0.00231933	0.00200648	0	0
280	Keratinocyte proline-rich protein OS=Homo sapiens GN=KPRP PE=1 SV=1	KPRP_HUMAN	64	8.29	Homo Sapiens	0	0	0	0	2	0	0	0	0	4	6	0	0	2	0	0	0	0	0	0.03125	0	0	0	0	0.0625	0.09375	0	0	0.03125	0	0	0	0	0	0.000411523	0	0	0	0	0.000593663	0.000891494	0	0	0.000362019
281	PDZ and LIM domain protein 1 OS=Homo sapiens GN=PDLIM1 PE=1 SV=4	PDLI1_HUMAN	36	7.03	Homo Sapiens	0	0	0	0	0	0	0	0	0	2	0	2	2	2	0	0	0	0	0	0	0	0	0	0	0.0555556	0	0.0555556	0.0555556	0.0555556	0	0	0	0	0	0	0	0	0	0	0.0005277	0	0.000571291	0.000695671	0.00064359
282	Phosphoglycerate kinase 1 OS=Homo sapiens GN=PGK1 PE=1 SV=3	PGK1_HUMAN	45	8.27	Homo Sapiens	0	0	0	0	2	0	0	0	0	0	0	0	0	0	0	0	0	0	0	0.0444444	0	0	0	0	0	0	0	0	0	0	0	0	0	0	0.000585277	0	0	0	0	0	0	0	0	0
283	Beta-Ala-His dipeptidase OS=Homo sapiens GN=CNDP1 PE=1 SV=4	CNDP1_HUMAN	57	4.95	Homo Sapiens	0	0	0	0	0	0	0	0	0	0	0	0	0	0	2	0	0	0	0	0	0	0	0	0	0	0	0	0	0	0.0350877	0	0	0	0	0	0	0	0	0	0	0	0	0	0
284	Actin-related protein 2/3 complex subunit 1B OS=Homo sapiens GN=ARPC1B PE=1 SV=3	ARC1B_HUMAN	41	8.44	Homo Sapiens	2	2	2	4	2	0	0	0	0	2	4	3	3	2	2	0.0487805	0.0487805	0.0487805	0.097561	0.0487805	0	0	0	0	0.0487805	0.097561	0.0731707	0.0731707	0.0487805	0.0487805	0.000892261	0.000930662	0.000920874	0.00132929	0.000642377	0	0	0	0	0.000463346	0.000927733	0.000752432	0.00091625	0.000565103
285	Transferrin receptor protein 1 OS=Homo sapiens GN=TFRC PE=1 SV=2	TFR1_HUMAN	85	6.58	Homo Sapiens	0	0	0	0	0	0	0	0	0	0	0	0	0	0	0	0	0	0	0	0	0	0	0	0	0	0	0	0	0	0	0	0	0	0	0	0	0	0	0	0	0	0	0	0
286	Caldesmon OS=Homo sapiens GN=CALD1 PE=1 SV=3	CALD1_HUMAN	93	5.35	Homo Sapiens	0	0	0	0	0	0	0	0	0	0	0	0	0	0	0	0	0	0	0	0	0	0	0	0	0	0	0	0	0	0	0	0	0	0	0	0	0	0	0	0	0	0	0	0
287	Secreted phosphoprotein 24 OS=Homo sapiens GN=SPP2 PE=1 SV=1	SPP24_HUMAN	24	8.46	Homo Sapiens	0	0	0	0	0	0	0	0	0	0	0	0	2	0	0	0	0	0	0	0	0	0	0	0	0	0	0	0.0833333	0	0	0	0	0	0	0	0	0	0	0	0	0	0	0.00104351	0
288	Cell division control protein 42 homolog OS=Homo sapiens GN=CDC42 PE=1 SV=2	CDC42_HUMAN	21	6.51	Homo Sapiens	0	0	0	0	0	2	0	0	0	2	2	0	0	0	0	0	0	0	0	0	0.0952381	0	0	0	0.0952381	0.0952381	0	0	0	0	0	0	0	0	0	0.00124323	0	0	0	0.000904629	0.000905644	0	0	0
289	Chloride intracellular channel protein 1 OS=Homo sapiens GN=CLIC1 PE=1 SV=4	CLIC1_HUMAN	27	4.82	Homo Sapiens	0	2	0	2	3	2	0	0	0	3	3	2	4	0	0	0	0.0740741	0	0.0740741	0.111111	0.0740741	0	0	0	0.111111	0.111111	0.0740741	0.148148	0	0	0	0.00141323	0	0.00100927	0.00146319	0.000966955	0	0	0	0.0010554	0.00105659	0.000761721	0.00185512	0
290	Platelet glycoprotein V OS=Homo sapiens GN=GP5 PE=1 SV=1	GPV_HUMAN	61	10.24	Homo Sapiens	0	0	0	2	0	2	0	0	0	0	2	2	0	0	0	0	0	0	0.0327869	0	0.0327869	0	0	0	0	0.0327869	0.0327869	0	0	0	0	0	0	0.000446727	0	0.000427996	0	0	0	0	0.000311779	0.000337155	0	0
291	Ficolin-2 OS=Homo sapiens GN=FCN2 PE=1 SV=2	FCN2_HUMAN	34	6.77	Homo Sapiens	0	0	0	0	0	0	0	0	0	2	2	4	2	3	3	0	0	0	0	0	0	0	0	0	0.0588235	0.0588235	0.117647	0.0588235	0.0882353	0.0882353	0	0	0	0	0	0	0	0	0	0.000558741	0.000559369	0.00120979	0.000736593	0.00102217
292	Galectin-3-binding protein OS=Homo sapiens GN=LGALS3BP PE=1 SV=1	LG3BP_HUMAN	65	4.9	Homo Sapiens	0	0	0	0	0	0	0	0	0	0	0	0	0	0	0	0	0	0	0	0	0	0	0	0	0	0	0	0	0	0	0	0	0	0	0	0	0	0	0	0	0	0	0	0
293	Collectin-11 OS=Homo sapiens GN=COLEC11 PE=1 SV=1	COL11_HUMAN	29	5.06	Homo Sapiens	0	0	0	0	0	0	0	0	0	0	0	0	0	0	0	0	0	0	0	0	0	0	0	0	0	0	0	0	0	0	0	0	0	0	0	0	0	0	0	0	0	0	0	0
294	14-3-3 protein beta/alpha OS=Homo sapiens GN=YWHAB PE=1 SV=3	1433B_HUMAN	28	4.47	Homo Sapiens	0	0	0	4	6	0	0	0	0	0	5	4	0	3	0	0	0	0	0.142857	0.214286	0	0	0	0	0	0.178571	0.142857	0	0.107143	0	0	0	0	0.00194645	0.00282187	0	0	0	0	0	0.00169808	0.00146903	0	0.00124121
295	Tyrosine-protein kinase Lyn OS=Homo sapiens GN=LYN PE=1 SV=3	LYN_HUMAN	59	7.13	Homo Sapiens	0	0	0	2	0	2	0	0	0	2	3	2	2	2	3	0	0	0	0.0338983	0	0.0338983	0	0	0	0.0338983	0.0508475	0.0338983	0.0338983	0.0338983	0.0508475	0	0	0	0.00046187	0	0.000442505	0	0	0	0.000321986	0.000483522	0.000348584	0.000424477	0.000392699
296	Annexin A2 OS=Homo sapiens GN=ANXA2 PE=1 SV=2	ANXA2_HUMAN	39	7.91	Homo Sapiens	0	0	0	3	3	2	0	0	0	2	3	4	0	2	0	0	0	0	0.0769231	0.0769231	0.0512821	0	0	0	0.0512821	0.0769231	0.102564	0	0.0512821	0	0	0	0	0.00104809	0.00101298	0.00066943	0	0	0	0.000487108	0.000731482	0.00105469	0	0.000594083
297	BPI fold-containing family B member 1 OS=Homo sapiens GN=BPIFB1 PE=1 SV=1	BPIB1_HUMAN	52	7.26	Homo Sapiens	0	0	0	0	0	0	0	0	0	4	0	4	0	3	5	0	0	0	0	0	0	0	0	0	0.0769231	0	0.0769231	0	0.0576923	0.0961538	0	0	0	0	0	0	0	0	0	0.000730662	0	0.000791018	0	0.000668343
298	EMILIN-1 OS=Homo sapiens GN=EMILIN1 PE=1 SV=2	EMIL1_HUMAN	107	4.81	Homo Sapiens	4	0	3	2	2	4	2	0	0	4	2	7	3	4	3	0.0373832	0	0.0280374	0.0186916	0.0186916	0.0373832	0.0186916	0	0	0.0373832	0.0186916	0.0654206	0.0280374	0.0373832	0.0280374	0.000683789	0	0.000529288	0.000254676	0.000246145	0.000487996	0.000337881	0	0	0.000355088	0.000177743	0.000672735	0.000351086	0.00043307
299	Keratin, type I cuticular Ha2 OS=Homo sapiens GN=KRT32 PE=2 SV=3	K1H2_HUMAN	50	4.49	Homo Sapiens	0	0	0	0	0	0	0	0	0	4	4	0	0	4	4	0	0	0	0	0	0	0	0	0	0.08	0.08	0	0	0.08	0.08	0	0	0	0	0	0	0	0	0	0.000759888	0.000760741	0	0	0.000926769
300	Corticosteroid-binding globulin OS=Homo sapiens GN=SERPINA6 PE=1 SV=1	CBG_HUMAN	45	5.95	Homo Sapiens	0	0	0	0	0	0	0	0	0	3	4	2	3	2	3	0	0	0	0	0	0	0	0	0	0.0666667	0.0888889	0.0444444	0.0666667	0.0444444	0.0666667	0	0	0	0	0	0	0	0	0	0.00063324	0.000845268	0.000457033	0.000834806	0.000514872
301	Keratin, type II cytoskeletal 73 OS=Homo sapiens GN=KRT73 PE=1 SV=1	K2C73_HUMAN	59	7.26	Homo Sapiens	0	0	0	0	7	0	3	5	5	0	0	0	0	0	0	0	0	0	0	0.118644	0	0.0508475	0.0847458	0.0847458	0	0	0	0	0	0	0	0	0	0	0.00156239	0	0.00091915	0.00162018	0.00161352	0	0	0	0	0
302	Complement factor H-related protein 2 OS=Homo sapiens GN=CFHR2 PE=1 SV=1	FHR2_HUMAN	31	6.34	Homo Sapiens	0	0	0	0	0	0	0	4	0	0	7	7	6	6	9	0	0	0	0	0	0	0	0.129032	0	0	0.225806	0.225806	0.193548	0.193548	0.290323	0	0	0	0	0	0	0	0.00246686	0	0	0.00214725	0.00232202	0.00242363	0.00224218
303	Keratin, type II cytoskeletal 6B OS=Homo sapiens GN=KRT6B PE=1 SV=5	K2C6B_HUMAN	60	8.16	Homo Sapiens	0	0	0	0	0	0	13	0	17	0	45	0	43	43	0	0	0	0	0	0	0	0.216667	0	0.283333	0	0.75	0	0.716667	0.716667	0	0	0	0	0	0	0	0.0039166	0	0.00539455	0	0.00713195	0	0.00897416	0.00830231
304	CD59 glycoprotein OS=Homo sapiens GN=CD59 PE=1 SV=1	CD59_HUMAN	14	6.47	Homo Sapiens	0	0	0	0	0	0	0	0	0	0	0	2	0	0	0	0	0	0	0	0	0	0	0	0	0	0	0.142857	0	0	0	0	0	0	0	0	0	0	0	0	0	0	0.00146903	0	0
305	Retinol dehydrogenase 11 OS=Homo sapiens GN=RDH11 PE=1 SV=2	RDH11_HUMAN	35	9.06	Homo Sapiens	0	0	0	3	3	4	0	0	0	4	2	3	5	5	3	0	0	0	0.0857143	0.0857143	0.114286	0	0	0	0.114286	0.0571429	0.0857143	0.142857	0.142857	0.0857143	0	0	0	0.00116787	0.00112875	0.00149187	0	0	0	0.00108555	0.000543387	0.00088142	0.00178887	0.00165494
306	Endonuclease domain-containing 1 protein OS=Homo sapiens GN=ENDOD1 PE=1 SV=2	ENDD1_HUMAN	55	5.38	Homo Sapiens	2	2	0	0	0	0	0	0	0	3	6	4	4	3	4	0.0363636	0.0363636	0	0	0	0	0	0	0	0.0545455	0.109091	0.0727273	0.0727273	0.0545455	0.0727273	0.00066514	0.000693766	0	0	0	0	0	0	0	0.000518106	0.00103737	0.000747872	0.000910697	0.000631888
307	Azurocidin OS=Homo sapiens GN=AZU1 PE=1 SV=3	CAP7_HUMAN	27	9.65	Homo Sapiens	0	0	0	0	0	0	0	0	0	0	0	0	0	0	0	0	0	0	0	0	0	0	0	0	0	0	0	0	0	0	0	0	0	0	0	0	0	0	0	0	0	0	0	0
308	Integrin alpha-2 OS=Homo sapiens GN=ITGA2 PE=1 SV=1	ITA2_HUMAN	129	4.95	Homo Sapiens	0	0	0	0	0	2	0	0	0	5	4	5	5	5	8	0	0	0	0	0	0.0155039	0	0	0	0.0387597	0.0310078	0.0387597	0.0387597	0.0387597	0.0620155	0	0	0	0	0	0.000202386	0	0	0	0.000368163	0.000294861	0.000398575	0.000485352	0.000449016
309	Keratin, type II cuticular Hb2 OS=Homo sapiens GN=KRT82 PE=3 SV=3	KRT82_HUMAN	57	6.72	Homo Sapiens	0	0	0	0	0	0	0	0	0	0	0	0	0	0	0	0	0	0	0	0	0	0	0	0	0	0	0	0	0	0	0	0	0	0	0	0	0	0	0	0	0	0	0	0
310	Keratin, type II cuticular Hb5 OS=Homo sapiens GN=KRT85 PE=1 SV=1	KRT85_HUMAN	56	6.49	Homo Sapiens	0	0	0	0	0	0	0	0	0	0	0	0	0	0	0	0	0	0	0	0	0	0	0	0	0	0	0	0	0	0	0	0	0	0	0	0	0	0	0	0	0	0	0	0
311	Hemoglobin subunit delta OS=Homo sapiens GN=HBD PE=1 SV=2	HBD_HUMAN	16	8.26	Homo Sapiens	0	0	0	0	0	0	0	0	0	0	0	0	0	0	0	0	0	0	0	0	0	0	0	0	0	0	0	0	0	0	0	0	0	0	0	0	0	0	0	0	0	0	0	0
312	Coronin-1A OS=Homo sapiens GN=CORO1A PE=1 SV=4	COR1A_HUMAN	51	6.67	Homo Sapiens	0	0	0	0	0	0	0	0	0	3	0	2	3	2	3	0	0	0	0	0	0	0	0	0	0.0588235	0	0.0392157	0.0588235	0.0392157	0.0588235	0	0	0	0	0	0	0	0	0	0.000558741	0	0.000403264	0.000736593	0.000454299
313	Ras-related protein Rab-10 OS=Homo sapiens GN=RAB10 PE=1 SV=1	RAB10_HUMAN	23	8.61	Homo Sapiens	0	0	0	3	4	3	0	0	0	0	0	0	0	0	0	0	0	0	0.130435	0.173913	0.130435	0	0	0	0	0	0	0	0	0	0	0	0	0.0017772	0.00229022	0.00170268	0	0	0	0	0	0	0	0
314	Ig lambda chain V region 4A OS=Homo sapiens PE=4 SV=1	LV001_HUMAN	12	7.12	Homo Sapiens	0	0	0	0	0	0	0	0	0	2	0	0	0	0	0	0	0	0	0	0	0	0	0	0	0.166667	0	0	0	0	0	0	0	0	0	0	0	0	0	0	0.0015831	0	0	0	0
315	Transforming growth factor beta-1 OS=Homo sapiens GN=TGFB1 PE=1 SV=2	TGFB1_HUMAN	44	8.63	Homo Sapiens	0	0	0	0	0	2	2	0	0	3	4	3	3	4	5	0	0	0	0	0	0.0454545	0.0454545	0	0	0.0681818	0.0909091	0.0681818	0.0681818	0.0909091	0.113636	0	0	0	0	0	0.000593359	0.000821665	0	0	0.000647632	0.000864479	0.00070113	0.000853779	0.00105315
316	Myosin regulatory light polypeptide 9 OS=Homo sapiens GN=MYL9 PE=1 SV=4	MYL9_HUMAN	20	4.54	Homo Sapiens	0	0	2	3	5	5	2	0	0	12	10	12	0	10	10	0	0	0.1	0.15	0.25	0.25	0.1	0	0	0.6	0.5	0.6	0	0.5	0.5	0	0	0.00188779	0.00204378	0.00329218	0.00326347	0.00180766	0	0	0.00569916	0.00475463	0.00616994	0	0.00579231
317	HLA class I histocompatibility antigen, B-35 alpha chain OS=Homo sapiens GN=HLA-B PE=1 SV=1	1B35_HUMAN	40	6.43	Homo Sapiens	0	0	0	0	0	0	0	0	0	0	0	0	0	0	0	0	0	0	0	0	0	0	0	0	0	0	0	0	0	0	0	0	0	0	0	0	0	0	0	0	0	0	0	0
318	Ig heavy chain V-I region Mot OS=Homo sapiens PE=1 SV=1	HV107_HUMAN	14	6.23	Homo Sapiens	0	0	0	0	0	0	0	0	0	0	0	0	0	0	0	0	0	0	0	0	0	0	0	0	0	0	0	0	0	0	0	0	0	0	0	0	0	0	0	0	0	0	0	0
319	Complement factor H-related protein 4 OS=Homo sapiens GN=CFHR4 PE=1 SV=3	FHR4_HUMAN	65	4.58	Homo Sapiens	0	0	0	0	0	0	0	0	0	0	0	0	0	0	0	0	0	0	0	0	0	0	0	0	0	0	0	0	0	0	0	0	0	0	0	0	0	0	0	0	0	0	0	0
320	Complement factor H-related protein 3 OS=Homo sapiens GN=CFHR3 PE=1 SV=2	FHR3_HUMAN	37	7.59	Homo Sapiens	0	0	0	0	0	0	0	0	0	0	0	0	0	0	0	0	0	0	0	0	0	0	0	0	0	0	0	0	0	0	0	0	0	0	0	0	0	0	0	0	0	0	0	0
321	Mannan-binding lectin serine protease 1 OS=Homo sapiens GN=MASP1 PE=1 SV=3	MASP1_HUMAN	79	5.18	Homo Sapiens	0	0	0	0	0	0	0	0	0	0	0	2	0	2	3	0	0	0	0	0	0	0	0	0	0	0	0.0253165	0	0.0253165	0.0379747	0	0	0	0	0	0	0	0	0	0	0	0.000260335	0	0.000293281
322	ADP-ribosylation factor 1 OS=Homo sapiens GN=ARF1 PE=1 SV=2	ARF1_HUMAN	21	6.8	Homo Sapiens	0	0	0	0	0	0	0	0	0	0	3	0	0	0	2	0	0	0	0	0	0	0	0	0	0	0.142857	0	0	0	0.0952381	0	0	0	0	0	0	0	0	0	0	0.00135847	0	0	0
323	ADP/ATP translocase 2 OS=Homo sapiens GN=SLC25A5 PE=1 SV=7	ADT2_HUMAN	33	10.18	Homo Sapiens	0	0	0	2	2	3	0	0	0	2	4	4	2	3	4	0	0	0	0.0606061	0.0606061	0.0909091	0	0	0	0.0606061	0.121212	0.121212	0.0606061	0.0909091	0.121212	0	0	0	0.000825768	0.000798105	0.00118672	0	0	0	0.000575673	0.00115264	0.00124645	0.000758914	0.00105315
324	Proto-oncogene tyrosine-protein kinase Src OS=Homo sapiens GN=SRC PE=1 SV=3	SRC_HUMAN	60	7.47	Homo Sapiens	2	0	0	0	0	0	0	0	0	3	3	0	2	0	2	0.0333333	0	0	0	0	0	0	0	0	0.05	0.05	0	0.0333333	0	0.0333333	0.000609712	0	0	0	0	0	0	0	0	0.00047493	0.000475463	0	0.000417403	0
325	Insulin-like growth factor-binding protein complex acid labile subunit OS=Homo sapiens GN=IGFALS PE=1 SV=1	ALS_HUMAN	66	6.78	Homo Sapiens	0	0	0	0	0	0	0	0	0	0	0	2	0	0	2	0	0	0	0	0	0	0	0	0	0	0	0.030303	0	0	0.030303	0	0	0	0	0	0	0	0	0	0	0	0.000311613	0	0
326	Prolactin-inducible protein OS=Homo sapiens GN=PIP PE=1 SV=1	PIP_HUMAN	17	8.18	Homo Sapiens	0	0	0	2	2	2	0	0	0	3	3	2	3	0	2	0	0	0	0.117647	0.117647	0.117647	0	0	0	0.176471	0.176471	0.117647	0.176471	0	0.117647	0	0	0	0.00160296	0.00154926	0.00153575	0	0	0	0.00167622	0.00167811	0.00120979	0.00220978	0
327	Phosphatidylcholine-sterol acyltransferase OS=Homo sapiens GN=LCAT PE=1 SV=1	LCAT_HUMAN	50	6.04	Homo Sapiens	0	0	0	0	0	0	0	0	0	2	4	2	0	2	2	0	0	0	0	0	0	0	0	0	0.04	0.08	0.04	0	0.04	0.04	0	0	0	0	0	0	0	0	0	0.000379944	0.000760741	0.000411329	0	0.000463385
328	Sarcoplasmic/endoplasmic reticulum calcium ATPase 2 OS=Homo sapiens GN=ATP2A2 PE=1 SV=1	AT2A2_HUMAN	115	4.99	Homo Sapiens	3	0	4	4	3	0	0	0	0	9	6	7	6	8	5	0.026087	0	0.0347826	0.0347826	0.026087	0	0	0	0	0.0782609	0.0521739	0.0608696	0.0521739	0.0695652	0.0434783	0.000477166	0	0.000656623	0.000473919	0.000343532	0	0	0	0	0.000743369	0.000496136	0.000625936	0.000653326	0.000805886
329	NADH-cytochrome b5 reductase 3 OS=Homo sapiens GN=CYB5R3 PE=1 SV=3	NB5R3_HUMAN	34	7.68	Homo Sapiens	0	0	0	0	2	0	0	0	0	2	4	5	3	5	3	0	0	0	0	0.0588235	0	0	0	0	0.0588235	0.117647	0.147059	0.0882353	0.147059	0.0882353	0	0	0	0	0.000774632	0	0	0	0	0.000558741	0.00111874	0.00151224	0.00110489	0.00170362
330	Sushi, von Willebrand factor type A, EGF and pentraxin domain-containing protein 1 OS=Homo sapiens GN=SVEP1 PE=1 SV=3	SVEP1_HUMAN	390	5.2	Homo Sapiens	0	0	0	0	3	0	0	0	0	0	0	0	0	0	0	0	0	0	0	0.00769231	0	0	0	0	0	0	0	0	0	0	0	0	0	0	0.000101298	0	0	0	0	0	0	0	0	0
331	Phosphatidylinositide phosphatase SAC1 OS=Homo sapiens GN=SACM1L PE=1 SV=2	SAC1_HUMAN	67	7.13	Homo Sapiens	0	0	0	0	2	0	0	0	0	7	5	3	5	5	3	0	0	0	0	0.0298507	0	0	0	0	0.104478	0.0746269	0.0447761	0.0746269	0.0746269	0.0447761	0	0	0	0	0.000393097	0	0	0	0	0.000992391	0.000709647	0.000460443	0.000934484	0.000864523
332	EH domain-containing protein 3 OS=Homo sapiens GN=EHD3 PE=1 SV=2	EHD3_HUMAN	61	6.53	Homo Sapiens	2	2	0	0	0	0	0	0	0	4	4	0	0	0	2	0.0327869	0.0327869	0	0	0	0	0	0	0	0.0655738	0.0655738	0	0	0	0.0327869	0.000599716	0.000625527	0	0	0	0	0	0	0	0.000622859	0.000623558	0	0	0
333	Carnitine O-palmitoyltransferase 1, liver isoform OS=Homo sapiens GN=CPT1A PE=1 SV=2	CPT1A_HUMAN	88	8.84	Homo Sapiens	2	2	3	0	3	3	0	0	0	2	2	0	2	0	2	0.0227273	0.0227273	0.0340909	0	0.0340909	0.0340909	0	0	0	0.0227273	0.0227273	0	0.0227273	0	0.0227273	0.000415712	0.000433604	0.000643566	0	0.000448934	0.000445019	0	0	0	0.000215877	0.00021612	0	0.000284593	0
334	Elongation factor 1-alpha 1 OS=Homo sapiens GN=EEF1A1 PE=1 SV=1	EF1A1_HUMAN	50	9.5	Homo Sapiens	0	0	0	0	3	2	0	0	0	0	0	0	0	2	0	0	0	0	0	0.06	0.04	0	0	0	0	0	0	0	0.04	0	0	0	0	0	0.000790124	0.000522156	0	0	0	0	0	0	0	0.000463385
335	Actin-related protein 2 OS=Homo sapiens GN=ACTR2 PE=1 SV=1	ARP2_HUMAN	45	6.72	Homo Sapiens	0	0	0	0	0	0	0	0	0	4	3	4	3	2	4	0	0	0	0	0	0	0	0	0	0.0888889	0.0666667	0.0888889	0.0666667	0.0444444	0.0888889	0	0	0	0	0	0	0	0	0	0.00084432	0.000633951	0.000914065	0.000834806	0.000514872
336	Keratin, type II cytoskeletal 80 OS=Homo sapiens GN=KRT80 PE=1 SV=2	K2C80_HUMAN	51	5.36	Homo Sapiens	0	0	0	0	0	0	0	0	0	7	7	5	5	5	4	0	0	0	0	0	0	0	0	0	0.137255	0.137255	0.0980392	0.0980392	0.0980392	0.0784314	0	0	0	0	0	0	0	0	0	0.00130373	0.00130519	0.00100816	0.00122766	0.00113575
337	Annexin A1 OS=Homo sapiens GN=ANXA1 PE=1 SV=2	ANXA1_HUMAN	39	7.04	Homo Sapiens	0	0	0	0	0	0	0	0	0	0	0	0	0	3	3	0	0	0	0	0	0	0	0	0	0	0	0	0	0.0769231	0.0769231	0	0	0	0	0	0	0	0	0	0	0	0	0	0.000891124
338	Guanine nucleotide-binding protein G(q) subunit alpha OS=Homo sapiens GN=GNAQ PE=1 SV=4	GNAQ_HUMAN	42	5.37	Homo Sapiens	0	0	0	2	0	2	0	0	0	5	2	2	2	3	4	0	0	0	0.047619	0	0.047619	0	0	0	0.119048	0.047619	0.047619	0.047619	0.0714286	0.0952381	0	0	0	0.000648818	0	0.000621614	0	0	0	0.00113079	0.000452822	0.000489678	0.00059629	0.000827472
339	Syntaxin-binding protein 2 OS=Homo sapiens GN=STXBP2 PE=1 SV=2	STXB2_HUMAN	66	6.52	Homo Sapiens	2	0	2	0	0	3	0	0	0	2	2	3	0	2	2	0.030303	0	0.030303	0	0	0.0454545	0	0	0	0.030303	0.030303	0.0454545	0	0.030303	0.030303	0.000554283	0	0.000572058	0	0	0.000593359	0	0	0	0.000287836	0.00028816	0.00046742	0	0.000351049
340	14-3-3 protein theta OS=Homo sapiens GN=YWHAQ PE=1 SV=1	1433T_HUMAN	28	4.41	Homo Sapiens	0	0	0	0	0	0	0	0	0	4	4	0	0	0	0	0	0	0	0	0	0	0	0	0	0.142857	0.142857	0	0	0	0	0	0	0	0	0	0	0	0	0	0.00135694	0.00135847	0	0	0
341	Reticulon-4 OS=Homo sapiens GN=RTN4 PE=1 SV=2	RTN4_HUMAN	130	4.14	Homo Sapiens	2	2	2	3	4	3	0	0	0	4	2	6	2	4	3	0.0153846	0.0153846	0.0153846	0.0230769	0.0307692	0.0230769	0	0	0	0.0307692	0.0153846	0.0461538	0.0153846	0.0307692	0.0230769	0.000281405	0.000293516	0.00029043	0.000314427	0.000405192	0.000301244	0	0	0	0.000292265	0.000146296	0.000474611	0.000192647	0.00035645
342	Amine oxidase [flavin-containing] B OS=Homo sapiens GN=MAOB PE=1 SV=3	AOFB_HUMAN	59	7.55	Homo Sapiens	2	2	2	0	0	2	2	0	2	2	4	2	3	2	3	0.0338983	0.0338983	0.0338983	0	0	0.0338983	0.0338983	0	0.0338983	0.0338983	0.0677966	0.0338983	0.0508475	0.0338983	0.0508475	0.000620046	0.000646731	0.00063993	0	0	0.000442505	0.000612767	0	0.00064541	0.000321986	0.000644696	0.000348584	0.000636716	0.000392699
343	Cartilage acidic protein 1 OS=Homo sapiens GN=CRTAC1 PE=1 SV=2	CRAC1_HUMAN	71	4.73	Homo Sapiens	0	0	0	0	0	0	0	0	0	0	0	0	0	0	0	0	0	0	0	0	0	0	0	0	0	0	0	0	0	0	0	0	0	0	0	0	0	0	0	0	0	0	0	0
344	Protein 4.1 OS=Homo sapiens GN=EPB41 PE=1 SV=4	41_HUMAN	97	5.27	Homo Sapiens	0	0	0	0	0	0	0	0	0	0	0	0	0	0	0	0	0	0	0	0	0	0	0	0	0	0	0	0	0	0	0	0	0	0	0	0	0	0	0	0	0	0	0	0
345	Calponin-2 OS=Homo sapiens GN=CNN2 PE=1 SV=4	CNN2_HUMAN	34	7.38	Homo Sapiens	0	0	0	0	0	0	0	0	0	0	0	0	0	0	0	0	0	0	0	0	0	0	0	0	0	0	0	0	0	0	0	0	0	0	0	0	0	0	0	0	0	0	0	0
346	Beta-2-microglobulin OS=Homo sapiens GN=B2M PE=1 SV=1	B2MG_HUMAN	14	6.51	Homo Sapiens	0	0	0	0	0	0	0	0	0	0	0	0	0	0	0	0	0	0	0	0	0	0	0	0	0	0	0	0	0	0	0	0	0	0	0	0	0	0	0	0	0	0	0	0
347	Ig kappa chain V-II region GM607 (Fragment) OS=Homo sapiens PE=4 SV=1	KV205_HUMAN	13	7.25	Homo Sapiens	0	0	0	0	0	0	0	0	0	0	0	0	0	0	0	0	0	0	0	0	0	0	0	0	0	0	0	0	0	0	0	0	0	0	0	0	0	0	0	0	0	0	0	0
348	Fatty acid-binding protein, epidermal OS=Homo sapiens GN=FABP5 PE=1 SV=3	FABP5_HUMAN	15	7.05	Homo Sapiens	0	0	0	2	0	0	0	0	0	2	4	2	2	2	2	0	0	0	0.133333	0	0	0	0	0	0.133333	0.266667	0.133333	0.133333	0.133333	0.133333	0	0	0	0.00181669	0	0	0	0	0	0.00126648	0.0025358	0.0013711	0.00166961	0.00154462
349	Pentraxin-related protein PTX3 OS=Homo sapiens GN=PTX3 PE=1 SV=3	PTX3_HUMAN	42	4.67	Homo Sapiens	0	0	0	0	0	0	0	0	0	0	0	0	0	0	0	0	0	0	0	0	0	0	0	0	0	0	0	0	0	0	0	0	0	0	0	0	0	0	0	0	0	0	0	0
350	Voltage-dependent anion-selective channel protein 3 OS=Homo sapiens GN=VDAC3 PE=1 SV=1	VDAC3_HUMAN	31	8.9	Homo Sapiens	0	0	0	0	2	2	0	0	0	3	4	2	2	4	2	0	0	0	0	0.0645161	0.0645161	0	0	0	0.0967742	0.129032	0.0645161	0.0645161	0.129032	0.0645161	0	0	0	0	0.000849596	0.000842186	0	0	0	0.00091922	0.001227	0.000663435	0.000807876	0.00149479
351	Peptidyl-prolyl cis-trans isomerase F, mitochondrial OS=Homo sapiens GN=PPIF PE=1 SV=1	PPIF_HUMAN	22	9.95	Homo Sapiens	2	0	0	0	2	0	0	0	0	0	0	3	0	0	2	0.0909091	0	0	0	0.0909091	0	0	0	0	0	0	0.136364	0	0	0.0909091	0.00166285	0	0	0	0.00119716	0	0	0	0	0	0	0.00140226	0	0
352	14-3-3 protein gamma OS=Homo sapiens GN=YWHAG PE=1 SV=2	1433G_HUMAN	28	4.52	Homo Sapiens	0	0	0	2	4	3	0	0	0	3	3	3	2	3	2	0	0	0	0.0714286	0.142857	0.107143	0	0	0	0.107143	0.107143	0.107143	0.0714286	0.107143	0.0714286	0	0	0	0.000973227	0.00188125	0.00139863	0	0	0	0.00101771	0.00101885	0.00110178	0.000894435	0.00124121
353	Keratin, type II cytoskeletal 78 OS=Homo sapiens GN=KRT78 PE=2 SV=2	K2C78_HUMAN	57	5.83	Homo Sapiens	0	0	0	0	0	0	0	0	0	9	5	10	7	4	0	0	0	0	0	0	0	0	0	0	0.157895	0.0877193	0.175439	0.122807	0.0701754	0	0	0	0	0	0	0	0	0	0	0.00149978	0.000834146	0.00180408	0.0015378	0.000812955
354	Keratin, type I cuticular Ha1 OS=Homo sapiens GN=KRT31 PE=1 SV=3	K1H1_HUMAN	47	4.53	Homo Sapiens	0	0	0	0	0	0	0	0	0	6	6	0	0	0	0	0	0	0	0	0	0	0	0	0	0.12766	0.12766	0	0	0	0	0	0	0	0	0	0	0	0	0	0.00121259	0.00121395	0	0	0
355	Ras suppressor protein 1 OS=Homo sapiens GN=RSU1 PE=1 SV=3	RSU1_HUMAN	32	9.16	Homo Sapiens	0	0	0	2	2	2	0	0	0	4	2	0	0	0	2	0	0	0	0.0625	0.0625	0.0625	0	0	0	0.125	0.0625	0	0	0	0.0625	0	0	0	0.000851574	0.000823046	0.000815868	0	0	0	0.00118733	0.000594329	0	0	0
356	Angiogenin OS=Homo sapiens GN=ANG PE=1 SV=1	ANGI_HUMAN	17	10.09	Homo Sapiens	0	0	0	0	0	0	0	0	0	0	0	2	0	0	0	0	0	0	0	0	0	0	0	0	0	0	0.117647	0	0	0	0	0	0	0	0	0	0	0	0	0	0	0.00120979	0	0
357	Ras-related protein Rab-27B OS=Homo sapiens GN=RAB27B PE=1 SV=4	RB27B_HUMAN	25	5.13	Homo Sapiens	0	0	0	0	3	0	0	0	0	6	3	3	4	4	3	0	0	0	0	0.12	0	0	0	0	0.24	0.12	0.12	0.16	0.16	0.12	0	0	0	0	0.00158025	0	0	0	0	0.00227966	0.00114111	0.00123399	0.00200353	0.00185354
358	Peroxiredoxin-6 OS=Homo sapiens GN=PRDX6 PE=1 SV=3	PRDX6_HUMAN	25	6.29	Homo Sapiens	2	2	3	0	0	0	0	0	0	0	2	0	0	0	2	0.08	0.08	0.12	0	0	0	0	0	0	0	0.08	0	0	0	0.08	0.00146331	0.00152629	0.00226535	0	0	0	0	0	0	0	0.000760741	0	0	0
359	Pregnancy zone protein OS=Homo sapiens GN=PZP PE=1 SV=4	PZP_HUMAN	164	6.33	Homo Sapiens	0	0	0	0	0	0	0	0	0	0	0	0	0	0	0	0	0	0	0	0	0	0	0	0	0	0	0	0	0	0	0	0	0	0	0	0	0	0	0	0	0	0	0	0
360	Receptor-type tyrosine-protein phosphatase eta OS=Homo sapiens GN=PTPRJ PE=1 SV=3	PTPRJ_HUMAN	146	5.28	Homo Sapiens	0	0	0	0	0	0	0	0	0	4	2	5	4	2	4	0	0	0	0	0	0	0	0	0	0.0273973	0.0136986	0.0342466	0.0273973	0.0136986	0.0273973	0	0	0	0	0	0	0	0	0	0.000260236	0.000130264	0.000352166	0.000343071	0.000158693
361	HLA class I histocompatibility antigen, B-78 alpha chain OS=Homo sapiens GN=HLA-B PE=1 SV=1	1B78_HUMAN	40	6.19	Homo Sapiens	0	0	0	0	0	0	0	0	0	0	0	0	0	0	0	0	0	0	0	0	0	0	0	0	0	0	0	0	0	0	0	0	0	0	0	0	0	0	0	0	0	0	0	0
362	Histone H3.2 OS=Homo sapiens GN=HIST2H3A PE=1 SV=3	H32_HUMAN	15	11.83	Homo Sapiens	0	0	0	0	0	0	0	0	0	0	0	0	0	0	0	0	0	0	0	0	0	0	0	0	0	0	0	0	0	0	0	0	0	0	0	0	0	0	0	0	0	0	0	0
363	Platelet-activating factor acetylhydrolase OS=Homo sapiens GN=PLA2G7 PE=1 SV=1	PAFA_HUMAN	50	7.61	Homo Sapiens	0	0	0	0	0	0	0	0	0	0	0	0	0	0	0	0	0	0	0	0	0	0	0	0	0	0	0	0	0	0	0	0	0	0	0	0	0	0	0	0	0	0	0	0
364	Tubulin beta-4B chain OS=Homo sapiens GN=TUBB4B PE=1 SV=1	TBB4B_HUMAN	50	4.52	Homo Sapiens	0	0	0	0	0	0	0	0	0	0	0	13	0	13	0	0	0	0	0	0	0	0	0	0	0	0	0.26	0	0.26	0	0	0	0	0	0	0	0	0	0	0	0	0.00267364	0	0.003012
365	Peroxisomal multifunctional enzyme type 2 OS=Homo sapiens GN=HSD17B4 PE=1 SV=3	DHB4_HUMAN	80	9.21	Homo Sapiens	0	0	0	0	0	0	0	0	0	5	4	3	2	3	5	0	0	0	0	0	0	0	0	0	0.0625	0.05	0.0375	0.025	0.0375	0.0625	0	0	0	0	0	0	0	0	0	0.000593663	0.000475463	0.000385621	0.000313052	0.000434423
366	Small proline-rich protein 2E OS=Homo sapiens GN=SPRR2E PE=2 SV=2	SPR2E_HUMAN	8	8.38	Homo Sapiens	0	0	0	0	0	0	0	0	0	5	4	5	6	6	5	0	0	0	0	0	0	0	0	0	0.625	0.5	0.625	0.75	0.75	0.625	0	0	0	0	0	0	0	0	0	0.00593663	0.00475463	0.00642702	0.00939156	0.00868846
367	Cytochrome b-c1 complex subunit 2, mitochondrial OS=Homo sapiens GN=UQCRC2 PE=1 SV=3	QCR2_HUMAN	48	8.92	Homo Sapiens	2	0	2	0	2	2	0	2	0	0	3	0	2	0	2	0.0416667	0	0.0416667	0	0.0416667	0.0416667	0	0.0416667	0	0	0.0625	0	0.0416667	0	0.0416667	0.00076214	0	0.00078658	0	0.000548697	0.000543912	0	0.000796589	0	0	0.000594329	0	0.000521754	0
368	Carbonic anhydrase 1 OS=Homo sapiens GN=CA1 PE=1 SV=2	CAH1_HUMAN	29	7.14	Homo Sapiens	0	0	0	0	0	0	0	0	0	0	0	0	0	0	0	0	0	0	0	0	0	0	0	0	0	0	0	0	0	0	0	0	0	0	0	0	0	0	0	0	0	0	0	0
369	Ig heavy chain V-II region ARH-77 OS=Homo sapiens PE=4 SV=1	HV209_HUMAN	16	8.45	Homo Sapiens	0	0	0	0	0	0	0	0	0	0	0	0	0	2	0	0	0	0	0	0	0	0	0	0	0	0	0	0	0.125	0	0	0	0	0	0	0	0	0	0	0	0	0	0	0.00144808
370	B-cell receptor-associated protein 31 OS=Homo sapiens GN=BCAP31 PE=1 SV=3	BAP31_HUMAN	28	8.88	Homo Sapiens	0	0	0	0	2	0	2	0	2	0	0	2	2	2	0	0	0	0	0	0.0714286	0	0.0714286	0	0.0714286	0	0	0.0714286	0.0714286	0.0714286	0	0	0	0	0	0.000940624	0	0.00129119	0	0.00135997	0	0	0.000734517	0.000894435	0.000827472
371	Thyroxine-binding globulin OS=Homo sapiens GN=SERPINA7 PE=1 SV=2	THBG_HUMAN	46	6.27	Homo Sapiens	0	0	0	0	0	0	0	0	0	0	0	0	0	0	0	0	0	0	0	0	0	0	0	0	0	0	0	0	0	0	0	0	0	0	0	0	0	0	0	0	0	0	0	0
372	Malate dehydrogenase, mitochondrial OS=Homo sapiens GN=MDH2 PE=1 SV=3	MDHM_HUMAN	36	8.9	Homo Sapiens	0	3	2	0	0	2	0	2	0	0	0	0	0	0	0	0	0.0833333	0.0555556	0	0	0.0555556	0	0.0555556	0	0	0	0	0	0	0	0	0.00158988	0.00104877	0	0	0.000725216	0	0.00106212	0	0	0	0	0	0
373	F-actin-capping protein subunit alpha-1 OS=Homo sapiens GN=CAPZA1 PE=1 SV=3	CAZA1_HUMAN	33	5.42	Homo Sapiens	0	0	0	0	0	0	0	0	0	2	2	4	3	2	0	0	0	0	0	0	0	0	0	0	0.0606061	0.0606061	0.121212	0.0909091	0.0606061	0	0	0	0	0	0	0	0	0	0	0.000575673	0.000576319	0.00124645	0.00113837	0.000702098
374	Ras-related protein Rab-11B OS=Homo sapiens GN=RAB11B PE=1 SV=4	RB11B_HUMAN	24	5.73	Homo Sapiens	0	0	0	0	0	2	0	0	0	0	2	2	0	0	0	0	0	0	0	0	0.0833333	0	0	0	0	0.0833333	0.0833333	0	0	0	0	0	0	0	0	0.00108782	0	0	0	0	0.000792439	0.000856936	0	0
375	Syntaxin-11 OS=Homo sapiens GN=STX11 PE=1 SV=1	STX11_HUMAN	33	6.51	Homo Sapiens	0	2	0	0	0	0	0	0	0	2	2	3	2	0	2	0	0.0606061	0	0	0	0	0	0	0	0.0606061	0.0606061	0.0909091	0.0606061	0	0.0606061	0	0.00115628	0	0	0	0	0	0	0	0.000575673	0.000576319	0.00093484	0.000758914	0
376	Calreticulin OS=Homo sapiens GN=CALR PE=1 SV=1	CALR_HUMAN	48	4.04	Homo Sapiens	0	0	0	0	0	0	0	0	0	3	2	3	0	2	3	0	0	0	0	0	0	0	0	0	0.0625	0.0416667	0.0625	0	0.0416667	0.0625	0	0	0	0	0	0	0	0	0	0.000593663	0.000396219	0.000642702	0	0.000482692
377	Actin-related protein 2/3 complex subunit 3 OS=Homo sapiens GN=ARPC3 PE=1 SV=3	ARPC3_HUMAN	21	8.83	Homo Sapiens	0	0	0	0	0	0	0	0	0	0	2	0	0	0	0	0	0	0	0	0	0	0	0	0	0	0.0952381	0	0	0	0	0	0	0	0	0	0	0	0	0	0	0.000905644	0	0	0
378	Cadherin-1 OS=Homo sapiens GN=CDH1 PE=1 SV=3	CADH1_HUMAN	97	4.33	Homo Sapiens	0	0	0	2	2	2	0	0	0	0	2	0	0	2	2	0	0	0	0.0206186	0.0206186	0.0206186	0	0	0	0	0.0206186	0	0	0.0206186	0.0206186	0	0	0	0.000280931	0.00027152	0.000269152	0	0	0	0	0.000196067	0	0	0.000238858
379	Peroxiredoxin-1 OS=Homo sapiens GN=PRDX1 PE=1 SV=1	PRDX1_HUMAN	22	8.31	Homo Sapiens	0	0	0	2	3	4	0	0	0	3	0	0	0	0	2	0	0	0	0.0909091	0.136364	0.181818	0	0	0	0.136364	0	0	0	0	0.0909091	0	0	0	0.00123865	0.00179574	0.00237343	0	0	0	0.00129526	0	0	0	0
380	Voltage-dependent anion-selective channel protein 2 OS=Homo sapiens GN=VDAC2 PE=1 SV=2	VDAC2_HUMAN	32	7.65	Homo Sapiens	0	0	0	0	0	0	0	0	0	4	3	2	2	3	0	0	0	0	0	0	0	0	0	0	0.125	0.09375	0.0625	0.0625	0.09375	0	0	0	0	0	0	0	0	0	0	0.00118733	0.000891494	0.000642702	0.00078263	0.00108606
381	Ras-related protein Rab-14 OS=Homo sapiens GN=RAB14 PE=1 SV=4	RAB14_HUMAN	24	6.13	Homo Sapiens	0	0	0	0	0	0	0	0	0	0	3	0	0	0	0	0	0	0	0	0	0	0	0	0	0	0.125	0	0	0	0	0	0	0	0	0	0	0	0	0	0	0.00118866	0	0	0
382	Stromal interaction molecule 1 OS=Homo sapiens GN=STIM1 PE=1 SV=3	STIM1_HUMAN	77	6.65	Homo Sapiens	0	0	0	0	0	0	0	0	0	4	2	2	3	4	2	0	0	0	0	0	0	0	0	0	0.0519481	0.025974	0.025974	0.038961	0.0519481	0.025974	0	0	0	0	0	0	0	0	0	0.000493434	0.000246994	0.000267097	0.000487873	0.000601798
383	Proline-serine-threonine phosphatase-interacting protein 2 OS=Homo sapiens GN=PSTPIP2 PE=1 SV=4	PPIP2_HUMAN	39	8.68	Homo Sapiens	0	0	0	0	0	0	0	0	0	0	2	0	0	0	3	0	0	0	0	0	0	0	0	0	0	0.0512821	0	0	0	0.0769231	0	0	0	0	0	0	0	0	0	0	0.000487655	0	0	0
384	Collagen alpha-1(VI) chain OS=Homo sapiens GN=COL6A1 PE=1 SV=3	CO6A1_HUMAN	109	5.05	Homo Sapiens	0	0	0	0	0	0	0	0	0	0	0	0	0	0	0	0	0	0	0	0	0	0	0	0	0	0	0	0	0	0	0	0	0	0	0	0	0	0	0	0	0	0	0	0
385	Four and a half LIM domains protein 1 OS=Homo sapiens GN=FHL1 PE=1 SV=4	FHL1_HUMAN	36	9.15	Homo Sapiens	0	0	0	0	2	2	0	0	0	2	3	2	0	0	0	0	0	0	0	0.0555556	0.0555556	0	0	0	0.0555556	0.0833333	0.0555556	0	0	0	0	0	0	0	0.000731597	0.000725216	0	0	0	0.0005277	0.000792439	0.000571291	0	0
386	Coagulation factor VIII OS=Homo sapiens GN=F8 PE=1 SV=1	FA8_HUMAN	267	7.37	Homo Sapiens	0	0	0	0	0	0	0	0	0	0	0	0	0	0	0	0	0	0	0	0	0	0	0	0	0	0	0	0	0	0	0	0	0	0	0	0	0	0	0	0	0	0	0	0
387	Ig kappa chain V-III region VG (Fragment) OS=Homo sapiens PE=1 SV=1	KV309_HUMAN	13	4.59	Homo Sapiens	0	0	0	0	0	0	0	0	0	0	0	0	0	0	0	0	0	0	0	0	0	0	0	0	0	0	0	0	0	0	0	0	0	0	0	0	0	0	0	0	0	0	0	0
388	Carcinoembryonic antigen-related cell adhesion molecule 8 OS=Homo sapiens GN=CEACAM8 PE=1 SV=2	CEAM8_HUMAN	38	7.45	Homo Sapiens	0	0	0	0	0	0	0	0	0	0	0	0	0	0	0	0	0	0	0	0	0	0	0	0	0	0	0	0	0	0	0	0	0	0	0	0	0	0	0	0	0	0	0	0
389	Tropomyosin beta chain OS=Homo sapiens GN=TPM2 PE=1 SV=1	TPM2_HUMAN	33	4.36	Homo Sapiens	0	0	0	0	0	0	0	0	0	0	0	0	0	9	0	0	0	0	0	0	0	0	0	0	0	0	0	0	0.272727	0	0	0	0	0	0	0	0	0	0	0	0	0	0	0.00315944
390	Synaptosomal-associated protein 23 OS=Homo sapiens GN=SNAP23 PE=1 SV=1	SNP23_HUMAN	23	4.62	Homo Sapiens	0	0	0	0	0	0	0	0	0	0	2	0	0	2	0	0	0	0	0	0	0	0	0	0	0	0.0869565	0	0	0.0869565	0	0	0	0	0	0	0	0	0	0	0	0.000826893	0	0	0.00100736
391	Protein disulfide-isomerase OS=Homo sapiens GN=P4HB PE=1 SV=3	PDIA1_HUMAN	57	4.49	Homo Sapiens	0	0	0	0	0	0	0	0	0	0	2	0	2	2	0	0	0	0	0	0	0	0	0	0	0	0.0350877	0	0.0350877	0.0350877	0	0	0	0	0	0	0	0	0	0	0	0.000333658	0	0.000439371	0.000406478
392	Ig kappa chain V-I region DEE OS=Homo sapiens PE=1 SV=1	KV105_HUMAN	12	9.71	Homo Sapiens	0	0	0	0	0	0	0	0	0	0	0	0	0	0	0	0	0	0	0	0	0	0	0	0	0	0	0	0	0	0	0	0	0	0	0	0	0	0	0	0	0	0	0	0
393	Ig kappa chain V-I region Wes OS=Homo sapiens PE=1 SV=1	KV119_HUMAN	12	7.41	Homo Sapiens	0	0	0	0	0	0	0	0	0	0	0	0	0	0	0	0	0	0	0	0	0	0	0	0	0	0	0	0	0	0	0	0	0	0	0	0	0	0	0	0	0	0	0	0
394	Prohibitin-2 OS=Homo sapiens GN=PHB2 PE=1 SV=2	PHB2_HUMAN	33	10.41	Homo Sapiens	0	0	0	0	0	0	0	0	0	2	3	2	0	2	2	0	0	0	0	0	0	0	0	0	0.0606061	0.0909091	0.0606061	0	0.0606061	0.0606061	0	0	0	0	0	0	0	0	0	0.000575673	0.000864479	0.000623226	0	0.000702098
395	Bridging integrator 2 OS=Homo sapiens GN=BIN2 PE=1 SV=3	BIN2_HUMAN	62	4.82	Homo Sapiens	0	0	0	0	0	0	0	0	0	0	0	0	0	0	0	0	0	0	0	0	0	0	0	0	0	0	0	0	0	0	0	0	0	0	0	0	0	0	0	0	0	0	0	0
396	Actin-related protein 2/3 complex subunit 2 OS=Homo sapiens GN=ARPC2 PE=1 SV=1	ARPC2_HUMAN	34	7.4	Homo Sapiens	0	0	0	0	0	0	0	0	0	0	2	0	0	0	2	0	0	0	0	0	0	0	0	0	0	0.0588235	0	0	0	0.0588235	0	0	0	0	0	0	0	0	0	0	0.000559369	0	0	0
397	Transitional endoplasmic reticulum ATPase OS=Homo sapiens GN=VCP PE=1 SV=4	TERA_HUMAN	89	4.89	Homo Sapiens	0	2	0	0	0	0	0	0	0	0	2	0	0	0	0	0	0.0224719	0	0	0	0	0	0	0	0	0.0224719	0	0	0	0	0	0.000428732	0	0	0	0	0	0	0	0	0.000213691	0	0	0
398	Nexilin OS=Homo sapiens GN=NEXN PE=1 SV=1	NEXN_HUMAN	81	4.99	Homo Sapiens	0	0	0	0	0	0	0	0	0	0	0	0	0	0	0	0	0	0	0	0	0	0	0	0	0	0	0	0	0	0	0	0	0	0	0	0	0	0	0	0	0	0	0	0
399	Ras-related C3 botulinum toxin substrate 1 OS=Homo sapiens GN=RAC1 PE=1 SV=1	RAC1_HUMAN	21	8.65	Homo Sapiens	3	0	0	0	0	0	0	0	0	0	0	0	0	0	0	0.142857	0	0	0	0	0	0	0	0	0	0	0	0	0	0	0.00261305	0	0	0	0	0	0	0	0	0	0	0	0	0
400	Antileukoproteinase OS=Homo sapiens GN=SLPI PE=1 SV=2	SLPI_HUMAN	14	8.85	Homo Sapiens	0	0	0	0	0	0	0	0	0	0	0	0	0	0	0	0	0	0	0	0	0	0	0	0	0	0	0	0	0	0	0	0	0	0	0	0	0	0	0	0	0	0	0	0
401	Elongation factor Tu, mitochondrial OS=Homo sapiens GN=TUFM PE=1 SV=2	EFTU_HUMAN	50	7.68	Homo Sapiens	3	0	0	0	0	2	0	0	0	0	2	0	0	0	0	0.06	0	0	0	0	0.04	0	0	0	0	0.04	0	0	0	0	0.00109748	0	0	0	0	0.000522156	0	0	0	0	0.000380371	0	0	0
402	G-protein coupled receptor 126 OS=Homo sapiens GN=GPR126 PE=1 SV=3	GP126_HUMAN	137	7.91	Homo Sapiens	0	0	0	0	0	0	0	0	0	0	0	0	0	0	0	0	0	0	0	0	0	0	0	0	0	0	0	0	0	0	0	0	0	0	0	0	0	0	0	0	0	0	0	0
403	Heparanase OS=Homo sapiens GN=HPSE PE=1 SV=2	HPSE_HUMAN	61	9.71	Homo Sapiens	0	0	0	0	0	0	0	0	0	0	0	0	0	0	0	0	0	0	0	0	0	0	0	0	0	0	0	0	0	0	0	0	0	0	0	0	0	0	0	0	0	0	0	0
404	Plastin-2 OS=Homo sapiens GN=LCP1 PE=1 SV=6	PLSL_HUMAN	70	5.07	Homo Sapiens	0	0	0	0	0	0	0	0	0	0	0	0	0	0	0	0	0	0	0	0	0	0	0	0	0	0	0	0	0	0	0	0	0	0	0	0	0	0	0	0	0	0	0	0
405	Phospholipase A2, membrane associated OS=Homo sapiens GN=PLA2G2A PE=1 SV=2	PA2GA_HUMAN	16	9.51	Homo Sapiens	0	0	0	0	0	0	0	0	0	0	0	0	0	0	0	0	0	0	0	0	0	0	0	0	0	0	0	0	0	0	0	0	0	0	0	0	0	0	0	0	0	0	0	0
406	Caspase-14 OS=Homo sapiens GN=CASP14 PE=1 SV=2	CASPE_HUMAN	28	5.28	Homo Sapiens	0	0	0	0	0	0	0	0	0	3	0	0	0	0	0	0	0	0	0	0	0	0	0	0	0.107143	0	0	0	0	0	0	0	0	0	0	0	0	0	0	0.00101771	0	0	0	0
407	Extracellular matrix protein 1 OS=Homo sapiens GN=ECM1 PE=1 SV=2	ECM1_HUMAN	61	6.7	Homo Sapiens	0	0	0	0	0	0	0	0	0	2	3	0	0	0	0	0	0	0	0	0	0	0	0	0	0.0327869	0.0491803	0	0	0	0	0	0	0	0	0	0	0	0	0	0.00031143	0.000467669	0	0	0
408	Protein S100-A4 OS=Homo sapiens GN=S100A4 PE=1 SV=1	S10A4_HUMAN	12	5.92	Homo Sapiens	0	0	0	0	0	0	0	0	0	0	0	0	0	0	0	0	0	0	0	0	0	0	0	0	0	0	0	0	0	0	0	0	0	0	0	0	0	0	0	0	0	0	0	0
409	Tropomyosin alpha-1 chain OS=Homo sapiens GN=TPM1 PE=1 SV=2	TPM1_HUMAN	33	4.39	Homo Sapiens	0	0	0	0	7	0	0	0	0	0	0	0	0	0	0	0	0	0	0	0.212121	0	0	0	0	0	0	0	0	0	0	0	0	0	0	0.00279337	0	0	0	0	0	0	0	0	0
410	Ig heavy chain V-I region V35 OS=Homo sapiens PE=1 SV=1	HV103_HUMAN	13	9.87	Homo Sapiens	0	0	0	0	0	0	0	0	0	0	0	0	0	0	0	0	0	0	0	0	0	0	0	0	0	0	0	0	0	0	0	0	0	0	0	0	0	0	0	0	0	0	0	0
411	Trem-like transcript 1 protein OS=Homo sapiens GN=TREML1 PE=1 SV=2	TRML1_HUMAN	33	5.95	Homo Sapiens	0	0	0	0	0	0	0	0	0	2	0	3	2	2	0	0	0	0	0	0	0	0	0	0	0.0606061	0	0.0909091	0.0606061	0.0606061	0	0	0	0	0	0	0	0	0	0	0.000575673	0	0.00093484	0.000758914	0.000702098
412	NAD(P) transhydrogenase, mitochondrial OS=Homo sapiens GN=NNT PE=1 SV=3	NNTM_HUMAN	114	8.21	Homo Sapiens	2	0	0	0	0	2	0	0	0	5	2	0	2	2	0	0.0175439	0	0	0	0	0.0175439	0	0	0	0.0438596	0.0175439	0	0.0175439	0.0175439	0	0.000320901	0	0	0	0	0.000229016	0	0	0	0.000416605	0.000166829	0	0.000219686	0.000203239
413	Tetranectin OS=Homo sapiens GN=CLEC3B PE=1 SV=3	TETN_HUMAN	23	5.36	Homo Sapiens	0	0	0	0	0	0	0	0	0	0	0	2	0	0	4	0	0	0	0	0	0	0	0	0	0	0	0.0869565	0	0	0.173913	0	0	0	0	0	0	0	0	0	0	0	0.000894194	0	0
414	Calmodulin OS=Homo sapiens GN=CALM1 PE=1 SV=2	CALM_HUMAN	17	3.84	Homo Sapiens	0	0	0	0	4	0	0	0	0	0	0	3	0	0	3	0	0	0	0	0.235294	0	0	0	0	0	0	0.176471	0	0	0.176471	0	0	0	0	0.00309853	0	0	0	0	0	0	0.00181469	0	0
415	Histone H1.3 OS=Homo sapiens GN=HIST1H1D PE=1 SV=2	H13_HUMAN	22	11.79	Homo Sapiens	2	0	0	0	0	0	0	0	0	0	0	0	0	0	0	0.0909091	0	0	0	0	0	0	0	0	0	0	0	0	0	0	0.00166285	0	0	0	0	0	0	0	0	0	0	0	0	0
416	Ig kappa chain V-I region HK102 (Fragment) OS=Homo sapiens GN=IGKV1-5 PE=4 SV=1	KV110_HUMAN	13	8.46	Homo Sapiens	0	0	0	0	0	0	0	0	0	3	2	0	3	0	0	0	0	0	0	0	0	0	0	0	0.230769	0.153846	0	0.230769	0	0	0	0	0	0	0	0	0	0	0	0.00219198	0.00146296	0	0.00288971	0
417	Versican core protein OS=Homo sapiens GN=VCAN PE=1 SV=3	CSPG2_HUMAN	373	4.15	Homo Sapiens	0	0	0	0	0	0	0	0	0	0	0	0	0	0	0	0	0	0	0	0	0	0	0	0	0	0	0	0	0	0	0	0	0	0	0	0	0	0	0	0	0	0	0	0
418	Ras-related protein Rab-7a OS=Homo sapiens GN=RAB7A PE=1 SV=1	RAB7A_HUMAN	23	6.59	Homo Sapiens	0	0	0	0	0	0	0	0	0	2	0	0	0	0	0	0	0	0	0	0	0	0	0	0	0.0869565	0	0	0	0	0	0	0	0	0	0	0	0	0	0	0.000825965	0	0	0	0
419	Skin-specific protein 32 OS=Homo sapiens GN=XP32 PE=1 SV=1	XP32_HUMAN	26	7.99	Homo Sapiens	0	0	0	0	0	0	0	0	0	0	0	0	0	0	2	0	0	0	0	0	0	0	0	0	0	0	0	0	0	0.0769231	0	0	0	0	0	0	0	0	0	0	0	0	0	0
420	Alpha-actinin-4 OS=Homo sapiens GN=ACTN4 PE=1 SV=2	ACTN4_HUMAN	105	5.12	Homo Sapiens	0	0	0	7	0	0	0	0	0	0	0	0	0	0	0	0	0	0	0.0666667	0	0	0	0	0	0	0	0	0	0	0	0	0	0	0.000908345	0	0	0	0	0	0	0	0	0	0
421	Malectin OS=Homo sapiens GN=MLEC PE=1 SV=1	MLEC_HUMAN	32	5.09	Homo Sapiens	0	0	0	0	0	0	0	0	0	3	2	2	3	2	5	0	0	0	0	0	0	0	0	0	0.09375	0.0625	0.0625	0.09375	0.0625	0.15625	0	0	0	0	0	0	0	0	0	0.000890494	0.000594329	0.000642702	0.00117395	0.000724038
422	Cytochrome c oxidase subunit 5A, mitochondrial OS=Homo sapiens GN=COX5A PE=1 SV=2	COX5A_HUMAN	17	6.78	Homo Sapiens	0	0	0	0	0	2	0	0	0	0	0	0	0	0	0	0	0	0	0	0	0.117647	0	0	0	0	0	0	0	0	0	0	0	0	0	0	0.00153575	0	0	0	0	0	0	0	0
423	Dolichyl-diphosphooligosaccharide--protein glycosyltransferase subunit 1 OS=Homo sapiens GN=RPN1 PE=1 SV=1	RPN1_HUMAN	69	6.34	Homo Sapiens	0	0	0	0	0	0	0	0	0	0	0	2	0	0	0	0	0	0	0	0	0	0	0	0	0	0	0.0289855	0	0	0	0	0	0	0	0	0	0	0	0	0	0	0.000298065	0	0
424	IgGFc-binding protein OS=Homo sapiens GN=FCGBP PE=1 SV=3	FCGBP_HUMAN	572	4.99	Homo Sapiens	0	0	0	0	0	0	0	0	0	0	0	0	0	0	0	0	0	0	0	0	0	0	0	0	0	0	0	0	0	0	0	0	0	0	0	0	0	0	0	0	0	0	0	0
425	Extended synaptotagmin-1 OS=Homo sapiens GN=ESYT1 PE=1 SV=1	ESYT1_HUMAN	123	5.61	Homo Sapiens	0	0	2	0	0	0	0	0	0	0	2	2	0	0	0	0	0	0.0162602	0	0	0	0	0	0	0	0.0162602	0.0162602	0	0	0	0	0	0.000306958	0	0	0	0	0	0	0	0.000154622	0.000167207	0	0
426	Stress-70 protein, mitochondrial OS=Homo sapiens GN=HSPA9 PE=1 SV=2	GRP75_HUMAN	74	6.01	Homo Sapiens	0	0	0	0	3	0	0	0	0	0	0	3	0	2	2	0	0	0	0	0.0405405	0	0	0	0	0	0	0.0405405	0	0.027027	0.027027	0	0	0	0	0.000533868	0	0	0	0	0	0	0.000416888	0	0.000313098
427	Keratin, type II cytoskeletal 1b OS=Homo sapiens GN=KRT77 PE=2 SV=3	K2C1B_HUMAN	62	5.78	Homo Sapiens	0	0	0	0	0	0	0	0	0	15	14	10	0	0	0	0	0	0	0	0	0	0	0	0	0.241935	0.225806	0.16129	0	0	0	0	0	0	0	0	0	0	0	0	0.00229805	0.00214725	0.00165859	0	0
428	Aminopeptidase N OS=Homo sapiens GN=ANPEP PE=1 SV=4	AMPN_HUMAN	110	5.14	Homo Sapiens	0	0	0	0	0	0	0	0	0	0	0	0	0	0	0	0	0	0	0	0	0	0	0	0	0	0	0	0	0	0	0	0	0	0	0	0	0	0	0	0	0	0	0	0
429	Protein G6b OS=Homo sapiens GN=G6B PE=1 SV=1	G6B_HUMAN	26	10.08	Homo Sapiens	0	0	0	0	0	0	0	0	0	0	2	2	2	2	2	0	0	0	0	0	0	0	0	0	0	0.0769231	0.0769231	0.0769231	0.0769231	0.0769231	0	0	0	0	0	0	0	0	0	0	0.000731482	0.000791018	0.000963237	0.000891124
430	Hexokinase-1 OS=Homo sapiens GN=HK1 PE=1 SV=3	HXK1_HUMAN	102	6.78	Homo Sapiens	0	0	0	0	0	0	0	0	0	2	0	2	2	3	0	0	0	0	0	0	0	0	0	0	0.0196078	0	0.0196078	0.0196078	0.0294118	0	0	0	0	0	0	0	0	0	0	0.000186247	0	0.000201632	0.000245531	0.000340724
431	Polymeric immunoglobulin receptor OS=Homo sapiens GN=PIGR PE=1 SV=4	PIGR_HUMAN	83	5.43	Homo Sapiens	0	0	0	0	0	0	0	0	0	0	0	0	0	0	0	0	0	0	0	0	0	0	0	0	0	0	0	0	0	0	0	0	0	0	0	0	0	0	0	0	0	0	0	0
432	Dematin OS=Homo sapiens GN=DMTN PE=1 SV=3	DEMA_HUMAN	46	9.36	Homo Sapiens	0	0	0	0	0	0	0	0	0	0	0	0	0	0	0	0	0	0	0	0	0	0	0	0	0	0	0	0	0	0	0	0	0	0	0	0	0	0	0	0	0	0	0	0
433	Actin-related protein 2/3 complex subunit 4 OS=Homo sapiens GN=ARPC4 PE=1 SV=3	ARPC4_HUMAN	20	8.71	Homo Sapiens	0	0	0	0	0	0	0	0	0	0	0	2	2	0	0	0	0	0	0	0	0	0	0	0	0	0	0.1	0.1	0	0	0	0	0	0	0	0	0	0	0	0	0	0.00102832	0.00125221	0
434	Ribonuclease 4 OS=Homo sapiens GN=RNASE4 PE=1 SV=3	RNAS4_HUMAN	17	9.17	Homo Sapiens	0	0	0	0	0	0	0	0	0	0	0	0	0	0	0	0	0	0	0	0	0	0	0	0	0	0	0	0	0	0	0	0	0	0	0	0	0	0	0	0	0	0	0	0
435	Tryptophan--tRNA ligase, cytoplasmic OS=Homo sapiens GN=WARS PE=1 SV=2	SYWC_HUMAN	53	6.15	Homo Sapiens	0	0	0	0	0	0	0	0	0	0	0	0	0	0	0	0	0	0	0	0	0	0	0	0	0	0	0	0	0	0	0	0	0	0	0	0	0	0	0	0	0	0	0	0
436	Microtubule-associated protein RP/EB family member 2 OS=Homo sapiens GN=MAPRE2 PE=1 SV=1	MARE2_HUMAN	37	5.28	Homo Sapiens	0	0	0	0	0	2	0	0	0	0	0	0	0	0	0	0	0	0	0	0	0.0540541	0	0	0	0	0	0	0	0	0	0	0	0	0	0	0.000705616	0	0	0	0	0	0	0	0
437	Protein diaphanous homolog 1 OS=Homo sapiens GN=DIAPH1 PE=1 SV=2	DIAP1_HUMAN	141	5.07	Homo Sapiens	0	0	0	0	0	0	0	0	0	2	0	0	0	0	0	0	0	0	0	0	0	0	0	0	0.0141844	0	0	0	0	0	0	0	0	0	0	0	0	0	0	0.000134732	0	0	0	0
438	Guanine nucleotide-binding protein G(I)/G(S)/G(O) subunit gamma-5 OS=Homo sapiens GN=GNG5 PE=1 SV=3	GBG5_HUMAN	7	10.62	Homo Sapiens	0	0	0	0	2	0	0	0	0	0	0	0	0	0	0	0	0	0	0	0.285714	0	0	0	0	0	0	0	0	0	0	0	0	0	0	0.0037625	0	0	0	0	0	0	0	0	0
439	Reelin OS=Homo sapiens GN=RELN PE=1 SV=3	RELN_HUMAN	388	5.74	Homo Sapiens	0	0	0	0	0	0	0	0	0	0	0	0	0	0	0	0	0	0	0	0	0	0	0	0	0	0	0	0	0	0	0	0	0	0	0	0	0	0	0	0	0	0	0	0
440	Bactericidal permeability-increasing protein OS=Homo sapiens GN=BPI PE=1 SV=4	BPI_HUMAN	54	9.89	Homo Sapiens	0	0	0	0	0	0	0	0	0	0	0	0	0	0	0	0	0	0	0	0	0	0	0	0	0	0	0	0	0	0	0	0	0	0	0	0	0	0	0	0	0	0	0	0
441	High affinity immunoglobulin epsilon receptor subunit gamma OS=Homo sapiens GN=FCER1G PE=1 SV=1	FCERG_HUMAN	10	7.25	Homo Sapiens	0	0	0	0	0	0	0	0	0	0	0	0	0	0	0	0	0	0	0	0	0	0	0	0	0	0	0	0	0	0	0	0	0	0	0	0	0	0	0	0	0	0	0	0
442	Peptidoglycan recognition protein 1 OS=Homo sapiens GN=PGLYRP1 PE=1 SV=1	PGRP1_HUMAN	22	8.68	Homo Sapiens	0	0	0	0	0	0	0	0	0	0	0	0	0	0	0	0	0	0	0	0	0	0	0	0	0	0	0	0	0	0	0	0	0	0	0	0	0	0	0	0	0	0	0	0
443	Thioredoxin OS=Homo sapiens GN=TXN PE=1 SV=3	THIO_HUMAN	12	4.55	Homo Sapiens	0	0	0	0	0	0	0	0	0	3	2	3	0	2	3	0	0	0	0	0	0	0	0	0	0.25	0.166667	0.25	0	0.166667	0.25	0	0	0	0	0	0	0	0	0	0.00237465	0.00158488	0.00257081	0	0.00193077
444	Phosphate carrier protein, mitochondrial OS=Homo sapiens GN=SLC25A3 PE=1 SV=2	MPCP_HUMAN	40	9.79	Homo Sapiens	0	0	0	0	0	3	0	0	0	0	2	0	0	0	3	0	0	0	0	0	0.075	0	0	0	0	0.05	0	0	0	0.075	0	0	0	0	0	0.000979042	0	0	0	0	0.000475463	0	0	0
445	Plakophilin-1 OS=Homo sapiens GN=PKP1 PE=1 SV=2	PKP1_HUMAN	83	9.41	Homo Sapiens	0	0	0	0	0	0	0	0	0	3	2	0	0	0	0	0	0	0	0	0	0	0	0	0	0.0361446	0.0240964	0	0	0	0	0	0	0	0	0	0	0	0	0	0.000343323	0.000229139	0	0	0
446	Coagulation factor XIII B chain OS=Homo sapiens GN=F13B PE=1 SV=3	F13B_HUMAN	76	6.36	Homo Sapiens	0	0	0	2	0	0	0	0	0	0	0	2	2	2	0	0	0	0	0.0263158	0	0	0	0	0	0	0	0.0263158	0.0263158	0.0263158	0	0	0	0	0.000358557	0	0	0	0	0	0	0	0.000270611	0.000329529	0.000304858
447	Ras-related protein Rab-6B OS=Homo sapiens GN=RAB6B PE=1 SV=1	RAB6B_HUMAN	23	5.14	Homo Sapiens	0	0	0	0	0	0	0	0	0	0	0	4	0	0	0	0	0	0	0	0	0	0	0	0	0	0	0.173913	0	0	0	0	0	0	0	0	0	0	0	0	0	0	0.00178839	0	0
448	Flotillin-1 OS=Homo sapiens GN=FLOT1 PE=1 SV=3	FLOT1_HUMAN	47	7.58	Homo Sapiens	0	0	0	0	0	0	0	0	0	0	0	0	0	0	0	0	0	0	0	0	0	0	0	0	0	0	0	0	0	0	0	0	0	0	0	0	0	0	0	0	0	0	0	0
449	Receptor-type tyrosine-protein phosphatase C OS=Homo sapiens GN=PTPRC PE=1 SV=2	PTPRC_HUMAN	147	6.08	Homo Sapiens	0	0	0	0	0	0	0	0	0	0	0	0	0	0	0	0	0	0	0	0	0	0	0	0	0	0	0	0	0	0	0	0	0	0	0	0	0	0	0	0	0	0	0	0
450	CD226 antigen OS=Homo sapiens GN=CD226 PE=1 SV=2	CD226_HUMAN	39	8.04	Homo Sapiens	0	0	0	0	0	0	0	0	0	0	2	0	0	0	0	0	0	0	0	0	0	0	0	0	0	0.0512821	0	0	0	0	0	0	0	0	0	0	0	0	0	0	0.000487655	0	0	0
451	Cystatin-A OS=Homo sapiens GN=CSTA PE=1 SV=1	CYTA_HUMAN	11	5.17	Homo Sapiens	0	0	0	0	0	0	0	0	0	0	0	0	0	0	0	0	0	0	0	0	0	0	0	0	0	0	0	0	0	0	0	0	0	0	0	0	0	0	0	0	0	0	0	0
452	Cytochrome b-c1 complex subunit 1, mitochondrial OS=Homo sapiens GN=UQCRC1 PE=1 SV=3	QCR1_HUMAN	53	6.32	Homo Sapiens	0	0	0	0	0	0	0	0	0	2	0	0	0	0	2	0	0	0	0	0	0	0	0	0	0.0377358	0	0	0	0	0.0377358	0	0	0	0	0	0	0	0	0	0.000358438	0	0	0	0
453	Ig heavy chain V-II region SESS OS=Homo sapiens PE=2 SV=1	HV208_HUMAN	16	7.18	Homo Sapiens	0	0	0	0	0	0	0	0	0	0	0	0	0	0	0	0	0	0	0	0	0	0	0	0	0	0	0	0	0	0	0	0	0	0	0	0	0	0	0	0	0	0	0	0
454	Protein disulfide-isomerase A6 OS=Homo sapiens GN=PDIA6 PE=1 SV=1	PDIA6_HUMAN	48	4.7	Homo Sapiens	0	2	0	0	0	0	0	0	0	0	0	0	0	0	0	0	0.0416667	0	0	0	0	0	0	0	0	0	0	0	0	0	0	0.00079494	0	0	0	0	0	0	0	0	0	0	0	0
455	Lymphocyte antigen 6 complex locus protein G6f OS=Homo sapiens GN=LY6G6F PE=1 SV=2	LY66F_HUMAN	32	8.65	Homo Sapiens	0	0	2	2	0	0	0	0	0	0	0	0	0	0	0	0	0	0.0625	0.0625	0	0	0	0	0	0	0	0	0	0	0	0	0	0.00117987	0.000851574	0	0	0	0	0	0	0	0	0	0
456	Basigin OS=Homo sapiens GN=BSG PE=1 SV=2	BASI_HUMAN	42	5.4	Homo Sapiens	0	0	0	0	0	0	0	0	0	2	0	2	0	0	0	0	0	0	0	0	0	0	0	0	0.047619	0	0.047619	0	0	0	0	0	0	0	0	0	0	0	0	0.000452314	0	0.000489678	0	0
457	Cytoplasmic FMR1-interacting protein 1 OS=Homo sapiens GN=CYFIP1 PE=1 SV=1	CYFP1_HUMAN	145	6.9	Homo Sapiens	0	0	0	0	0	0	0	0	0	0	2	2	0	2	3	0	0	0	0	0	0	0	0	0	0	0.0137931	0.0137931	0	0.0137931	0.0206897	0	0	0	0	0	0	0	0	0	0	0.000131162	0.000141838	0	0.000159788
458	ATP synthase subunit O, mitochondrial OS=Homo sapiens GN=ATP5O PE=1 SV=1	ATPO_HUMAN	23	10.61	Homo Sapiens	0	0	0	0	0	0	0	0	0	0	0	0	0	0	0	0	0	0	0	0	0	0	0	0	0	0	0	0	0	0	0	0	0	0	0	0	0	0	0	0	0	0	0	0
459	Glycerol-3-phosphate dehydrogenase, mitochondrial OS=Homo sapiens GN=GPD2 PE=1 SV=3	GPDM_HUMAN	81	7.77	Homo Sapiens	0	0	0	0	0	0	0	0	0	2	0	0	0	0	0	0	0	0	0	0	0	0	0	0	0.0246914	0	0	0	0	0	0	0	0	0	0	0	0	0	0	0.000234533	0	0	0	0
460	Serglycin OS=Homo sapiens GN=SRGN PE=1 SV=3	SRGN_HUMAN	18	4.57	Homo Sapiens	0	0	0	0	0	0	0	0	0	0	0	0	0	0	0	0	0	0	0	0	0	0	0	0	0	0	0	0	0	0	0	0	0	0	0	0	0	0	0	0	0	0	0	0
461	Poly(rC)-binding protein 1 OS=Homo sapiens GN=PCBP1 PE=1 SV=2	PCBP1_HUMAN	37	7.11	Homo Sapiens	0	0	0	0	0	0	0	0	0	0	0	0	0	0	0	0	0	0	0	0	0	0	0	0	0	0	0	0	0	0	0	0	0	0	0	0	0	0	0	0	0	0	0	0
462	Heat shock 70 kDa protein 1A/1B OS=Homo sapiens GN=HSPA1A PE=1 SV=5	HSP71_HUMAN	70	5.47	Homo Sapiens	0	0	0	0	0	0	0	0	0	0	0	0	0	0	0	0	0	0	0	0	0	0	0	0	0	0	0	0	0	0	0	0	0	0	0	0	0	0	0	0	0	0	0	0
463	Mannan-binding lectin serine protease 2 OS=Homo sapiens GN=MASP2 PE=1 SV=4	MASP2_HUMAN	76	5.37	Homo Sapiens	0	0	0	0	0	0	0	0	0	0	0	0	0	0	0	0	0	0	0	0	0	0	0	0	0	0	0	0	0	0	0	0	0	0	0	0	0	0	0	0	0	0	0	0
464	Lumican OS=Homo sapiens GN=LUM PE=1 SV=2	LUM_HUMAN	38	6.6	Homo Sapiens	0	0	0	0	0	0	0	0	0	3	3	4	0	2	3	0	0	0	0	0	0	0	0	0	0.0789474	0.0789474	0.105263	0	0.0526316	0.0789474	0	0	0	0	0	0	0	0	0	0.00074989	0.000750732	0.00108245	0	0.000609716
465	Glutathione peroxidase 1 OS=Homo sapiens GN=GPX1 PE=1 SV=4	GPX1_HUMAN	22	6.51	Homo Sapiens	0	0	0	0	0	0	0	0	0	0	3	2	0	0	0	0	0	0	0	0	0	0	0	0	0	0.136364	0.0909091	0	0	0	0	0	0	0	0	0	0	0	0	0	0.00129672	0.00093484	0	0
466	Synaptotagmin-like protein 4 OS=Homo sapiens GN=SYTL4 PE=1 SV=2	SYTL4_HUMAN	76	9.42	Homo Sapiens	0	0	0	0	0	0	0	0	0	0	0	0	0	0	0	0	0	0	0	0	0	0	0	0	0	0	0	0	0	0	0	0	0	0	0	0	0	0	0	0	0	0	0	0
467	ATP synthase subunit delta, mitochondrial OS=Homo sapiens GN=ATP5D PE=1 SV=2	ATPD_HUMAN	17	5.19	Homo Sapiens	0	0	0	0	0	0	0	0	0	0	3	0	0	0	0	0	0	0	0	0	0	0	0	0	0	0.176471	0	0	0	0	0	0	0	0	0	0	0	0	0	0	0.00167811	0	0	0
468	Collagen alpha-2(VI) chain OS=Homo sapiens GN=COL6A2 PE=1 SV=4	CO6A2_HUMAN	109	6.13	Homo Sapiens	0	0	0	0	0	0	0	0	0	0	0	0	0	0	0	0	0	0	0	0	0	0	0	0	0	0	0	0	0	0	0	0	0	0	0	0	0	0	0	0	0	0	0	0
469	Proprotein convertase subtilisin/kexin type 9 OS=Homo sapiens GN=PCSK9 PE=1 SV=3	PCSK9_HUMAN	74	6.59	Homo Sapiens	0	0	0	0	0	0	0	0	0	0	0	0	0	0	0	0	0	0	0	0	0	0	0	0	0	0	0	0	0	0	0	0	0	0	0	0	0	0	0	0	0	0	0	0
470	Tropomodulin-3 OS=Homo sapiens GN=TMOD3 PE=1 SV=1	TMOD3_HUMAN	40	4.83	Homo Sapiens	0	0	0	0	0	0	0	0	0	0	0	0	0	0	0	0	0	0	0	0	0	0	0	0	0	0	0	0	0	0	0	0	0	0	0	0	0	0	0	0	0	0	0	0
471	Calpain small subunit 1 OS=Homo sapiens GN=CAPNS1 PE=1 SV=1	CPNS1_HUMAN	28	4.82	Homo Sapiens	0	0	0	0	0	0	0	0	0	0	0	0	0	0	0	0	0	0	0	0	0	0	0	0	0	0	0	0	0	0	0	0	0	0	0	0	0	0	0	0	0	0	0	0
472	Calpain-1 catalytic subunit OS=Homo sapiens GN=CAPN1 PE=1 SV=1	CAN1_HUMAN	82	5.35	Homo Sapiens	0	0	0	2	0	0	0	0	0	0	2	0	0	0	2	0	0	0	0.0243902	0	0	0	0	0	0	0.0243902	0	0	0	0.0243902	0	0	0	0.000332321	0	0	0	0	0	0	0.000231933	0	0	0
473	Collectin-10 OS=Homo sapiens GN=COLEC10 PE=2 SV=2	COL10_HUMAN	31	7.39	Homo Sapiens	0	0	0	0	0	0	0	0	0	0	0	0	0	0	0	0	0	0	0	0	0	0	0	0	0	0	0	0	0	0	0	0	0	0	0	0	0	0	0	0	0	0	0	0
474	Plasma serine protease inhibitor OS=Homo sapiens GN=SERPINA5 PE=1 SV=3	IPSP_HUMAN	46	9.76	Homo Sapiens	0	0	0	0	0	0	0	0	0	0	0	0	0	0	0	0	0	0	0	0	0	0	0	0	0	0	0	0	0	0	0	0	0	0	0	0	0	0	0	0	0	0	0	0
475	Vitamin K-dependent protein C OS=Homo sapiens GN=PROC PE=1 SV=1	PROC_HUMAN	52	6.23	Homo Sapiens	0	0	0	0	0	0	0	0	0	2	0	0	0	0	2	0	0	0	0	0	0	0	0	0	0.0384615	0	0	0	0	0.0384615	0	0	0	0	0	0	0	0	0	0.000365331	0	0	0	0
476	Coagulation factor VII OS=Homo sapiens GN=F7 PE=1 SV=1	FA7_HUMAN	52	7.23	Homo Sapiens	0	0	0	0	0	0	0	0	0	0	0	0	0	0	0	0	0	0	0	0	0	0	0	0	0	0	0	0	0	0	0	0	0	0	0	0	0	0	0	0	0	0	0	0
477	Voltage-dependent anion-selective channel protein 1 OS=Homo sapiens GN=VDAC1 PE=1 SV=2	VDAC1_HUMAN	31	8.89	Homo Sapiens	0	0	0	0	0	0	0	0	0	0	0	2	0	0	0	0	0	0	0	0	0	0	0	0	0	0	0.0645161	0	0	0	0	0	0	0	0	0	0	0	0	0	0	0.000663435	0	0
478	Protein kinase C beta type OS=Homo sapiens GN=PRKCB PE=1 SV=4	KPCB_HUMAN	77	7	Homo Sapiens	0	0	0	0	0	0	0	0	0	0	0	3	2	0	0	0	0	0	0	0	0	0	0	0	0	0	0.038961	0.025974	0	0	0	0	0	0	0	0	0	0	0	0	0	0.000400646	0.000325249	0
479	Neutrophil elastase OS=Homo sapiens GN=ELANE PE=1 SV=1	ELNE_HUMAN	29	9.41	Homo Sapiens	0	0	0	0	0	0	0	0	0	0	0	0	0	0	0	0	0	0	0	0	0	0	0	0	0	0	0	0	0	0	0	0	0	0	0	0	0	0	0	0	0	0	0	0
480	CD44 antigen OS=Homo sapiens GN=CD44 PE=1 SV=3	CD44_HUMAN	82	5	Homo Sapiens	0	0	0	0	0	0	0	0	0	0	0	0	0	0	0	0	0	0	0	0	0	0	0	0	0	0	0	0	0	0	0	0	0	0	0	0	0	0	0	0	0	0	0	0
481	Annexin A3 OS=Homo sapiens GN=ANXA3 PE=1 SV=3	ANXA3_HUMAN	36	5.71	Homo Sapiens	0	0	0	0	0	0	0	0	0	0	0	0	0	0	0	0	0	0	0	0	0	0	0	0	0	0	0	0	0	0	0	0	0	0	0	0	0	0	0	0	0	0	0	0
482	Beta-1,4-galactosyltransferase 1 OS=Homo sapiens GN=B4GALT1 PE=1 SV=5	B4GT1_HUMAN	44	8.78	Homo Sapiens	0	0	0	0	0	0	0	0	0	0	0	0	0	0	0	0	0	0	0	0	0	0	0	0	0	0	0	0	0	0	0	0	0	0	0	0	0	0	0	0	0	0	0	0
483	Cornulin OS=Homo sapiens GN=CRNN PE=1 SV=1	CRNN_HUMAN	54	6.04	Homo Sapiens	0	0	0	0	0	0	0	0	0	0	0	3	0	0	3	0	0	0	0	0	0	0	0	0	0	0	0.0555556	0	0	0.0555556	0	0	0	0	0	0	0	0	0	0	0	0.000571291	0	0
484	C-C motif chemokine 5 OS=Homo sapiens GN=CCL5 PE=1 SV=3	CCL5_HUMAN	10	9.29	Homo Sapiens	2	0	0	0	0	0	0	0	0	0	0	0	0	0	0	0.2	0	0	0	0	0	0	0	0	0	0	0	0	0	0	0.00365827	0	0	0	0	0	0	0	0	0	0	0	0	0
485	Golgi-associated plant pathogenesis-related protein 1 OS=Homo sapiens GN=GLIPR2 PE=1 SV=3	GAPR1_HUMAN	17	9.92	Homo Sapiens	0	0	0	0	0	0	0	0	0	0	0	0	0	0	0	0	0	0	0	0	0	0	0	0	0	0	0	0	0	0	0	0	0	0	0	0	0	0	0	0	0	0	0	0
486	Complement C1r subcomponent-like protein OS=Homo sapiens GN=C1RL PE=1 SV=2	C1RL_HUMAN	53	7.2	Homo Sapiens	0	0	0	0	0	0	0	0	0	0	0	0	0	0	0	0	0	0	0	0	0	0	0	0	0	0	0	0	0	0	0	0	0	0	0	0	0	0	0	0	0	0	0	0
487	Disintegrin and metalloproteinase domain-containing protein 10 OS=Homo sapiens GN=ADAM10 PE=1 SV=1	ADA10_HUMAN	84	7.81	Homo Sapiens	0	0	0	0	0	0	0	0	0	0	0	4	0	0	0	0	0	0	0	0	0	0	0	0	0	0	0.047619	0	0	0	0	0	0	0	0	0	0	0	0	0	0	0.000489678	0	0
488	Lipocalin-1 OS=Homo sapiens GN=LCN1 PE=1 SV=1	LCN1_HUMAN	19	5.3	Homo Sapiens	0	0	0	0	0	0	0	0	0	2	2	0	0	0	0	0	0	0	0	0	0	0	0	0	0.105263	0.105263	0	0	0	0	0	0	0	0	0	0	0	0	0	0.000999853	0.00100098	0	0	0
489	Cytochrome b-245 heavy chain OS=Homo sapiens GN=CYBB PE=1 SV=2	CY24B_HUMAN	65	8.76	Homo Sapiens	0	0	0	0	0	0	0	0	0	0	0	0	0	0	0	0	0	0	0	0	0	0	0	0	0	0	0	0	0	0	0	0	0	0	0	0	0	0	0	0	0	0	0	0
490	Ras-related protein Rab-8A OS=Homo sapiens GN=RAB8A PE=1 SV=1	RAB8A_HUMAN	24	9.54	Homo Sapiens	0	0	0	0	0	0	0	0	0	0	4	0	0	0	0	0	0	0	0	0	0	0	0	0	0	0.166667	0	0	0	0	0	0	0	0	0	0	0	0	0	0	0.00158488	0	0	0
491	C-type lectin domain family 1 member B OS=Homo sapiens GN=CLEC1B PE=1 SV=2	CLC1B_HUMAN	27	8.62	Homo Sapiens	0	0	0	0	0	0	0	0	0	0	0	2	0	2	0	0	0	0	0	0	0	0	0	0	0	0	0.0740741	0	0.0740741	0	0	0	0	0	0	0	0	0	0	0	0	0.000761721	0	0.000858119
492	Rho-associated protein kinase 2 OS=Homo sapiens GN=ROCK2 PE=1 SV=4	ROCK2_HUMAN	161	5.84	Homo Sapiens	0	0	0	0	0	0	0	0	0	0	0	0	0	0	0	0	0	0	0	0	0	0	0	0	0	0	0	0	0	0	0	0	0	0	0	0	0	0	0	0	0	0	0	0
493	Periostin OS=Homo sapiens GN=POSTN PE=1 SV=2	POSTN_HUMAN	93	7.59	Homo Sapiens	0	0	0	0	0	0	0	0	0	0	0	0	0	0	0	0	0	0	0	0	0	0	0	0	0	0	0	0	0	0	0	0	0	0	0	0	0	0	0	0	0	0	0	0
494	Hemoglobin subunit gamma-1 OS=Homo sapiens GN=HBG1 PE=1 SV=2	HBG1_HUMAN	16	7.23	Homo Sapiens	0	0	0	0	0	0	0	0	0	0	0	0	0	0	0	0	0	0	0	0	0	0	0	0	0	0	0	0	0	0	0	0	0	0	0	0	0	0	0	0	0	0	0	0
495	Neurogranin OS=Homo sapiens GN=NRGN PE=1 SV=1	NEUG_HUMAN	8	8.06	Homo Sapiens	0	0	0	0	0	0	0	0	0	0	0	0	0	0	0	0	0	0	0	0	0	0	0	0	0	0	0	0	0	0	0	0	0	0	0	0	0	0	0	0	0	0	0	0
496	Gamma-glutamylcyclotransferase OS=Homo sapiens GN=GGCT PE=1 SV=1	GGCT_HUMAN	21	4.79	Homo Sapiens	0	0	0	0	0	0	0	0	0	0	0	0	0	0	0	0	0	0	0	0	0	0	0	0	0	0	0	0	0	0	0	0	0	0	0	0	0	0	0	0	0	0	0	0
497	Resistin OS=Homo sapiens GN=RETN PE=2 SV=1	RETN_HUMAN	11	6.89	Homo Sapiens	0	0	0	0	0	0	0	0	0	0	0	0	0	0	0	0	0	0	0	0	0	0	0	0	0	0	0	0	0	0	0	0	0	0	0	0	0	0	0	0	0	0	0	0
498	Tissue factor pathway inhibitor OS=Homo sapiens GN=TFPI PE=1 SV=1	TFPI1_HUMAN	35	8.31	Homo Sapiens	0	0	0	0	0	0	0	0	0	0	0	0	0	0	0	0	0	0	0	0	0	0	0	0	0	0	0	0	0	0	0	0	0	0	0	0	0	0	0	0	0	0	0	0
499	Kinesin-like protein KIF2A OS=Homo sapiens GN=KIF2A PE=1 SV=3	KIF2A_HUMAN	80	6.66	Homo Sapiens	0	0	0	0	0	0	0	0	0	0	0	0	0	0	0	0	0	0	0	0	0	0	0	0	0	0	0	0	0	0	0	0	0	0	0	0	0	0	0	0	0	0	0	0
500	Keratin, type I cuticular Ha6 OS=Homo sapiens GN=KRT36 PE=2 SV=1	KRT36_HUMAN	52	4.6	Homo Sapiens	0	0	0	0	0	0	0	0	0	0	0	0	0	0	0	0	0	0	0	0	0	0	0	0	0	0	0	0	0	0	0	0	0	0	0	0	0	0	0	0	0	0	0	0
501	Macrophage migration inhibitory factor OS=Homo sapiens GN=MIF PE=1 SV=4	MIF_HUMAN	12	8.05	Homo Sapiens	0	0	0	0	0	2	0	0	0	0	0	0	0	0	0	0	0	0	0	0	0.166667	0	0	0	0	0	0	0	0	0	0	0	0	0	0	0.00217565	0	0	0	0	0	0	0	0
502	Thioredoxin-dependent peroxide reductase, mitochondrial OS=Homo sapiens GN=PRDX3 PE=1 SV=3	PRDX3_HUMAN	28	7.88	Homo Sapiens	0	0	0	0	0	2	0	0	0	0	0	0	0	2	0	0	0	0	0	0	0.0714286	0	0	0	0	0	0	0	0.0714286	0	0	0	0	0	0	0.000932421	0	0	0	0	0	0	0	0.000827472
503	Serpin B12 OS=Homo sapiens GN=SERPINB12 PE=1 SV=1	SPB12_HUMAN	46	5.22	Homo Sapiens	0	0	0	0	0	0	0	0	0	2	0	0	0	0	0	0	0	0	0	0	0	0	0	0	0.0434783	0	0	0	0	0	0	0	0	0	0	0	0	0	0	0.000412983	0	0	0	0
504	Dolichyl-diphosphooligosaccharide--protein glycosyltransferase 48 kDa subunit OS=Homo sapiens GN=DDOST PE=1 SV=4	OST48_HUMAN	51	6.52	Homo Sapiens	0	0	0	0	0	0	0	0	0	0	0	0	0	0	0	0	0	0	0	0	0	0	0	0	0	0	0	0	0	0	0	0	0	0	0	0	0	0	0	0	0	0	0	0
505	Purine nucleoside phosphorylase OS=Homo sapiens GN=PNP PE=1 SV=2	PNPH_HUMAN	32	6.95	Homo Sapiens	0	0	0	0	0	0	0	0	0	0	2	2	0	0	0	0	0	0	0	0	0	0	0	0	0	0.0625	0.0625	0	0	0	0	0	0	0	0	0	0	0	0	0	0.000594329	0.000642702	0	0
506	Olfactomedin-4 OS=Homo sapiens GN=OLFM4 PE=1 SV=1	OLFM4_HUMAN	57	5.37	Homo Sapiens	0	0	0	0	0	0	0	0	0	0	0	0	0	0	0	0	0	0	0	0	0	0	0	0	0	0	0	0	0	0	0	0	0	0	0	0	0	0	0	0	0	0	0	0
507	ATP synthase subunit gamma, mitochondrial OS=Homo sapiens GN=ATP5C1 PE=1 SV=1	ATPG_HUMAN	33	9.71	Homo Sapiens	0	0	0	0	0	0	0	0	0	0	0	0	3	0	0	0	0	0	0	0	0	0	0	0	0	0	0	0.0909091	0	0	0	0	0	0	0	0	0	0	0	0	0	0	0.00113837	0
508	Cathepsin G OS=Homo sapiens GN=CTSG PE=1 SV=2	CATG_HUMAN	29	11.69	Homo Sapiens	0	0	0	0	0	0	0	0	0	0	0	0	0	0	0	0	0	0	0	0	0	0	0	0	0	0	0	0	0	0	0	0	0	0	0	0	0	0	0	0	0	0	0	0
509	Ras-related protein Rab-5C OS=Homo sapiens GN=RAB5C PE=1 SV=2	RAB5C_HUMAN	23	8.61	Homo Sapiens	0	0	0	0	0	0	0	0	0	0	0	2	0	0	2	0	0	0	0	0	0	0	0	0	0	0	0.0869565	0	0	0.0869565	0	0	0	0	0	0	0	0	0	0	0	0.000894194	0	0
510	Guanine nucleotide-binding protein G(z) subunit alpha OS=Homo sapiens GN=GNAZ PE=2 SV=3	GNAZ_HUMAN	41	7.69	Homo Sapiens	0	0	0	0	0	0	0	0	0	2	0	2	0	2	4	0	0	0	0	0	0	0	0	0	0.0487805	0	0.0487805	0	0.0487805	0.097561	0	0	0	0	0	0	0	0	0	0.000463346	0	0.000501621	0	0.000565103
511	Keratin, type I cuticular Ha5 OS=Homo sapiens GN=KRT35 PE=2 SV=5	KRT35_HUMAN	50	4.55	Homo Sapiens	0	0	0	0	0	0	0	0	0	0	0	0	0	0	0	0	0	0	0	0	0	0	0	0	0	0	0	0	0	0	0	0	0	0	0	0	0	0	0	0	0	0	0	0
512	Thioredoxin-related transmembrane protein 1 OS=Homo sapiens GN=TMX1 PE=1 SV=1	TMX1_HUMAN	32	4.63	Homo Sapiens	0	0	0	0	0	0	0	0	0	0	0	0	2	0	0	0	0	0	0	0	0	0	0	0	0	0	0	0.0625	0	0	0	0	0	0	0	0	0	0	0	0	0	0	0.00078263	0
513	cAMP-dependent protein kinase type I-alpha regulatory subunit OS=Homo sapiens GN=PRKAR1A PE=1 SV=1	KAP0_HUMAN	43	5	Homo Sapiens	0	0	0	0	0	0	0	0	0	0	0	0	0	0	0	0	0	0	0	0	0	0	0	0	0	0	0	0	0	0	0	0	0	0	0	0	0	0	0	0	0	0	0	0
514	Flavin reductase (NADPH) OS=Homo sapiens GN=BLVRB PE=1 SV=3	BLVRB_HUMAN	22	7.76	Homo Sapiens	0	0	0	0	0	0	0	0	0	0	0	0	0	0	0	0	0	0	0	0	0	0	0	0	0	0	0	0	0	0	0	0	0	0	0	0	0	0	0	0	0	0	0	0
515	Vimentin OS=Homo sapiens GN=VIM PE=1 SV=4	VIME_HUMAN	54	4.77	Homo Sapiens	0	0	0	3	2	0	0	0	0	0	0	0	0	0	0	0	0	0	0.0555556	0.037037	0	0	0	0	0	0	0	0	0	0	0	0	0	0.000756954	0.000487731	0	0	0	0	0	0	0	0	0
516	Prohibitin OS=Homo sapiens GN=PHB PE=1 SV=1	PHB_HUMAN	30	5.46	Homo Sapiens	0	0	0	0	0	0	0	0	0	0	2	0	0	0	0	0	0	0	0	0	0	0	0	0	0	0.0666667	0	0	0	0	0	0	0	0	0	0	0	0	0	0	0.000633951	0	0	0
517	Protein S100-A6 OS=Homo sapiens GN=S100A6 PE=1 SV=1	S10A6_HUMAN	10	5.15	Homo Sapiens	0	0	0	0	0	0	0	0	0	2	3	0	0	0	0	0	0	0	0	0	0	0	0	0	0.2	0.3	0	0	0	0	0	0	0	0	0	0	0	0	0	0.00189972	0.00285278	0	0	0
518	Alpha-1,3-mannosyl-glycoprotein 2-beta-N-acetylglucosaminyltransferase OS=Homo sapiens GN=MGAT1 PE=1 SV=2	MGAT1_HUMAN	51	9.49	Homo Sapiens	0	0	0	0	0	0	0	0	0	0	0	0	0	0	0	0	0	0	0	0	0	0	0	0	0	0	0	0	0	0	0	0	0	0	0	0	0	0	0	0	0	0	0	0
519	Myosin-4 OS=Homo sapiens GN=MYH4 PE=1 SV=2	MYH4_HUMAN	223	5.61	Homo Sapiens	0	0	0	0	0	0	0	0	0	0	0	0	0	0	0	0	0	0	0	0	0	0	0	0	0	0	0	0	0	0	0	0	0	0	0	0	0	0	0	0	0	0	0	0
520	Protein-glutamine gamma-glutamyltransferase E OS=Homo sapiens GN=TGM3 PE=1 SV=4	TGM3_HUMAN	77	5.6	Homo Sapiens	0	0	0	0	0	0	0	0	0	3	2	0	0	0	0	0	0	0	0	0	0	0	0	0	0.038961	0.025974	0	0	0	0	0	0	0	0	0	0	0	0	0	0.000370075	0.000246994	0	0	0
521	Succinate dehydrogenase [ubiquinone] flavoprotein subunit, mitochondrial OS=Homo sapiens GN=SDHA PE=1 SV=2	DHSA_HUMAN	72	7.06	Homo Sapiens	0	0	0	0	0	0	0	0	0	0	0	0	0	2	0	0	0	0	0	0	0	0	0	0	0	0	0	0	0.0277778	0	0	0	0	0	0	0	0	0	0	0	0	0	0	0.000321795
522	Low affinity immunoglobulin gamma Fc region receptor III-A OS=Homo sapiens GN=FCGR3A PE=1 SV=2	FCG3A_HUMAN	29	8.21	Homo Sapiens	0	0	0	0	0	0	0	0	0	0	0	0	0	0	0	0	0	0	0	0	0	0	0	0	0	0	0	0	0	0	0	0	0	0	0	0	0	0	0	0	0	0	0	0
523	CKLF-like MARVEL transmembrane domain-containing protein 5 OS=Homo sapiens GN=CMTM5 PE=1 SV=2	CKLF5_HUMAN	25	6.62	Homo Sapiens	0	0	0	0	0	0	0	0	0	2	2	2	0	0	0	0	0	0	0	0	0	0	0	0	0.08	0.08	0.08	0	0	0	0	0	0	0	0	0	0	0	0	0.000759888	0.000760741	0.000822659	0	0
524	Dihydrolipoyl dehydrogenase, mitochondrial OS=Homo sapiens GN=DLD PE=1 SV=2	DLDH_HUMAN	54	7.95	Homo Sapiens	0	0	0	0	0	0	0	0	0	0	2	0	0	0	0	0	0	0	0	0	0	0	0	0	0	0.037037	0	0	0	0	0	0	0	0	0	0	0	0	0	0	0.000352195	0	0	0
525	Endothelial cell-selective adhesion molecule OS=Homo sapiens GN=ESAM PE=1 SV=1	ESAM_HUMAN	41	9.75	Homo Sapiens	0	0	0	0	0	0	0	0	0	0	0	0	0	0	2	0	0	0	0	0	0	0	0	0	0	0	0	0	0	0.0487805	0	0	0	0	0	0	0	0	0	0	0	0	0	0
526	CD177 antigen OS=Homo sapiens GN=CD177 PE=1 SV=2	CD177_HUMAN	46	6.26	Homo Sapiens	0	0	0	0	0	0	0	0	0	0	0	0	0	0	0	0	0	0	0	0	0	0	0	0	0	0	0	0	0	0	0	0	0	0	0	0	0	0	0	0	0	0	0	0
527	Transforming growth factor beta-1-induced transcript 1 protein OS=Homo sapiens GN=TGFB1I1 PE=1 SV=2	TGFI1_HUMAN	50	7.03	Homo Sapiens	0	0	0	0	0	0	0	0	0	0	0	0	0	0	0	0	0	0	0	0	0	0	0	0	0	0	0	0	0	0	0	0	0	0	0	0	0	0	0	0	0	0	0	0
528	Ubiquitin-60S ribosomal protein L40 OS=Homo sapiens GN=UBA52 PE=1 SV=2	RL40_HUMAN	15	10.51	Homo Sapiens	0	0	0	0	0	0	0	0	0	0	0	0	0	0	0	0	0	0	0	0	0	0	0	0	0	0	0	0	0	0	0	0	0	0	0	0	0	0	0	0	0	0	0	0
529	L-selectin OS=Homo sapiens GN=SELL PE=1 SV=2	LYAM1_HUMAN	42	6.57	Homo Sapiens	0	0	0	0	0	0	0	0	0	0	0	0	0	0	0	0	0	0	0	0	0	0	0	0	0	0	0	0	0	0	0	0	0	0	0	0	0	0	0	0	0	0	0	0
530	Zymogen granule protein 16 homolog B OS=Homo sapiens GN=ZG16B PE=1 SV=3	ZG16B_HUMAN	23	7.63	Homo Sapiens	0	0	0	0	0	0	0	0	0	2	0	0	0	0	0	0	0	0	0	0	0	0	0	0	0.0869565	0	0	0	0	0	0	0	0	0	0	0	0	0	0	0.000825965	0	0	0	0
531	Dehydrogenase/reductase SDR family member 7 OS=Homo sapiens GN=DHRS7 PE=1 SV=1	DHRS7_HUMAN	38	8.47	Homo Sapiens	0	0	0	0	0	0	0	0	0	2	0	0	0	0	0	0	0	0	0	0	0	0	0	0	0.0526316	0	0	0	0	0	0	0	0	0	0	0	0	0	0	0.000499926	0	0	0	0
532	Thrombospondin-4 OS=Homo sapiens GN=THBS4 PE=1 SV=2	TSP4_HUMAN	106	4.23	Homo Sapiens	0	0	0	0	0	0	0	0	0	0	0	0	0	0	0	0	0	0	0	0	0	0	0	0	0	0	0	0	0	0	0	0	0	0	0	0	0	0	0	0	0	0	0	0
533	Matrix Gla protein OS=Homo sapiens GN=MGP PE=1 SV=2	MGP_HUMAN	12	9.98	Homo Sapiens	0	0	0	0	0	0	0	0	0	2	0	0	0	0	0	0	0	0	0	0	0	0	0	0	0.166667	0	0	0	0	0	0	0	0	0	0	0	0	0	0	0.0015831	0	0	0	0
534	Angiopoietin-related protein 3 OS=Homo sapiens GN=ANGPTL3 PE=1 SV=1	ANGL3_HUMAN	54	6.68	Homo Sapiens	0	0	0	0	0	0	0	0	0	0	0	0	0	0	0	0	0	0	0	0	0	0	0	0	0	0	0	0	0	0	0	0	0	0	0	0	0	0	0	0	0	0	0	0
535	Beta-adducin OS=Homo sapiens GN=ADD2 PE=1 SV=3	ADDB_HUMAN	81	5.73	Homo Sapiens	0	0	0	0	0	0	0	0	0	0	0	0	0	0	0	0	0	0	0	0	0	0	0	0	0	0	0	0	0	0	0	0	0	0	0	0	0	0	0	0	0	0	0	0
536	Serpin B3 OS=Homo sapiens GN=SERPINB3 PE=1 SV=2	SPB3_HUMAN	45	6.81	Homo Sapiens	0	0	0	0	0	0	0	0	0	2	0	0	0	0	0	0	0	0	0	0	0	0	0	0	0.0444444	0	0	0	0	0	0	0	0	0	0	0	0	0	0	0.00042216	0	0	0	0
537	Blood group Rh(CE) polypeptide OS=Homo sapiens GN=RHCE PE=1 SV=2	RHCE_HUMAN	46	9.71	Homo Sapiens	0	0	0	0	0	0	0	0	0	0	0	0	0	0	0	0	0	0	0	0	0	0	0	0	0	0	0	0	0	0	0	0	0	0	0	0	0	0	0	0	0	0	0	0
538	6-phosphogluconate dehydrogenase, decarboxylating OS=Homo sapiens GN=PGD PE=1 SV=3	6PGD_HUMAN	53	7.25	Homo Sapiens	0	0	0	0	0	0	0	0	0	0	0	0	0	0	0	0	0	0	0	0	0	0	0	0	0	0	0	0	0	0	0	0	0	0	0	0	0	0	0	0	0	0	0	0
539	Dermokine OS=Homo sapiens GN=DMKN PE=1 SV=3	DMKN_HUMAN	47	7.32	Homo Sapiens	0	0	0	0	0	0	0	0	0	0	2	0	0	0	0	0	0	0	0	0	0	0	0	0	0	0.0425532	0	0	0	0	0	0	0	0	0	0	0	0	0	0	0.00040465	0	0	0
540	Biotinidase OS=Homo sapiens GN=BTD PE=1 SV=2	BTD_HUMAN	61	6.22	Homo Sapiens	0	0	0	0	0	0	0	0	0	0	0	0	0	0	0	0	0	0	0	0	0	0	0	0	0	0	0	0	0	0	0	0	0	0	0	0	0	0	0	0	0	0	0	0
541	Trifunctional enzyme subunit alpha, mitochondrial OS=Homo sapiens GN=HADHA PE=1 SV=2	ECHA_HUMAN	83	9.52	Homo Sapiens	0	0	0	0	0	0	0	0	0	2	0	2	0	0	0	0	0	0	0	0	0	0	0	0	0.0240964	0	0.0240964	0	0	0	0	0	0	0	0	0	0	0	0	0.000228882	0	0.000247789	0	0
542	Glucose-6-phosphate 1-dehydrogenase OS=Homo sapiens GN=G6PD PE=1 SV=4	G6PD_HUMAN	59	6.84	Homo Sapiens	0	0	0	0	0	0	0	0	0	0	0	0	0	0	0	0	0	0	0	0	0	0	0	0	0	0	0	0	0	0	0	0	0	0	0	0	0	0	0	0	0	0	0	0
543	Dynein heavy chain 7, axonemal OS=Homo sapiens GN=DNAH7 PE=1 SV=2	DYH7_HUMAN	461	5.82	Homo Sapiens	0	0	0	0	0	0	0	0	0	0	0	0	0	0	0	0	0	0	0	0	0	0	0	0	0	0	0	0	0	0	0	0	0	0	0	0	0	0	0	0	0	0	0	0
544	Myotrophin OS=Homo sapiens GN=MTPN PE=1 SV=2	MTPN_HUMAN	13	5.18	Homo Sapiens	0	0	0	0	0	0	0	0	0	0	0	2	0	0	0	0	0	0	0	0	0	0	0	0	0	0	0.153846	0	0	0	0	0	0	0	0	0	0	0	0	0	0	0.00158204	0	0
545	Dolichyl-diphosphooligosaccharide--protein glycosyltransferase subunit 2 OS=Homo sapiens GN=RPN2 PE=1 SV=3	RPN2_HUMAN	69	5.46	Homo Sapiens	0	0	0	0	0	0	0	0	0	0	2	0	0	0	0	0	0	0	0	0	0	0	0	0	0	0.0289855	0	0	0	0	0	0	0	0	0	0	0	0	0	0	0.000275631	0	0	0
546	Protein S100-A14 OS=Homo sapiens GN=S100A14 PE=1 SV=1	S10AE_HUMAN	12	4.93	Homo Sapiens	0	0	0	0	0	0	0	0	0	0	2	0	0	0	0	0	0	0	0	0	0	0	0	0	0	0.166667	0	0	0	0	0	0	0	0	0	0	0	0	0	0	0.00158488	0	0	0
547	Myeloblastin OS=Homo sapiens GN=PRTN3 PE=1 SV=3	PRTN3_HUMAN	28	8.42	Homo Sapiens	0	0	0	0	0	0	0	0	0	0	0	0	0	0	0	0	0	0	0	0	0	0	0	0	0	0	0	0	0	0	0	0	0	0	0	0	0	0	0	0	0	0	0	0
548	Interleukin enhancer-binding factor 2 OS=Homo sapiens GN=ILF2 PE=1 SV=2	ILF2_HUMAN	43	4.93	Homo Sapiens	0	0	0	0	0	0	0	0	0	0	0	0	0	0	0	0	0	0	0	0	0	0	0	0	0	0	0	0	0	0	0	0	0	0	0	0	0	0	0	0	0	0	0	0
549	Aconitate hydratase, mitochondrial OS=Homo sapiens GN=ACO2 PE=1 SV=2	ACON_HUMAN	85	7.65	Homo Sapiens	0	0	0	0	0	0	0	0	0	0	2	0	0	0	0	0	0	0	0	0	0	0	0	0	0	0.0235294	0	0	0	0	0	0	0	0	0	0	0	0	0	0	0.000223747	0	0	0
550	Sodium/potassium-transporting ATPase subunit alpha-1 OS=Homo sapiens GN=ATP1A1 PE=1 SV=1	AT1A1_HUMAN	113	5.15	Homo Sapiens	0	0	0	0	0	0	0	0	0	0	0	0	0	0	0	0	0	0	0	0	0	0	0	0	0	0	0	0	0	0	0	0	0	0	0	0	0	0	0	0	0	0	0	0
551	Pantetheinase OS=Homo sapiens GN=VNN1 PE=1 SV=2	VNN1_HUMAN	57	5.26	Homo Sapiens	0	0	0	0	0	0	0	0	0	0	0	0	0	0	0	0	0	0	0	0	0	0	0	0	0	0	0	0	0	0	0	0	0	0	0	0	0	0	0	0	0	0	0	0
552	Fibulin-5 OS=Homo sapiens GN=FBLN5 PE=1 SV=1	FBLN5_HUMAN	50	4.33	Homo Sapiens	0	0	0	0	0	0	0	0	0	0	0	0	0	0	0	0	0	0	0	0	0	0	0	0	0	0	0	0	0	0	0	0	0	0	0	0	0	0	0	0	0	0	0	0
553	Tight junction protein ZO-2 OS=Homo sapiens GN=TJP2 PE=1 SV=2	ZO2_HUMAN	134	7.43	Homo Sapiens	0	0	0	0	0	0	0	0	0	0	0	0	0	0	0	0	0	0	0	0	0	0	0	0	0	0	0	0	0	0	0	0	0	0	0	0	0	0	0	0	0	0	0	0
554	Arachidonate 12-lipoxygenase, 12S-type OS=Homo sapiens GN=ALOX12 PE=1 SV=4	LOX12_HUMAN	76	6.15	Homo Sapiens	0	0	0	0	0	0	0	0	0	0	2	0	0	0	2	0	0	0	0	0	0	0	0	0	0	0.0263158	0	0	0	0.0263158	0	0	0	0	0	0	0	0	0	0	0.000250244	0	0	0
555	Arginase-1 OS=Homo sapiens GN=ARG1 PE=1 SV=2	ARGI1_HUMAN	35	7.25	Homo Sapiens	0	0	0	0	0	0	0	0	0	0	0	0	0	0	0	0	0	0	0	0	0	0	0	0	0	0	0	0	0	0	0	0	0	0	0	0	0	0	0	0	0	0	0	0
556	Inverted formin-2 OS=Homo sapiens GN=INF2 PE=1 SV=2	INF2_HUMAN	136	5.03	Homo Sapiens	0	0	0	0	0	0	0	0	0	0	0	0	0	0	0	0	0	0	0	0	0	0	0	0	0	0	0	0	0	0	0	0	0	0	0	0	0	0	0	0	0	0	0	0
557	Transketolase OS=Homo sapiens GN=TKT PE=1 SV=3	TKT_HUMAN	68	7.73	Homo Sapiens	0	0	0	2	0	2	0	0	0	0	0	0	0	0	0	0	0	0	0.0294118	0	0.0294118	0	0	0	0	0	0	0	0	0	0	0	0	0.00040074	0	0.000383938	0	0	0	0	0	0	0	0
558	Metalloproteinase inhibitor 3 OS=Homo sapiens GN=TIMP3 PE=1 SV=2	TIMP3_HUMAN	24	8.86	Homo Sapiens	0	0	0	0	0	0	0	0	0	0	0	0	0	0	0	0	0	0	0	0	0	0	0	0	0	0	0	0	0	0	0	0	0	0	0	0	0	0	0	0	0	0	0	0
559	Ras-related protein Rap-2b OS=Homo sapiens GN=RAP2B PE=1 SV=1	RAP2B_HUMAN	21	4.44	Homo Sapiens	0	0	0	0	0	0	0	0	0	0	2	0	0	0	0	0	0	0	0	0	0	0	0	0	0	0.0952381	0	0	0	0	0	0	0	0	0	0	0	0	0	0	0.000905644	0	0	0
560	Cornifin-A OS=Homo sapiens GN=SPRR1A PE=1 SV=2	SPR1A_HUMAN	10	8.6	Homo Sapiens	0	0	0	0	0	0	0	0	0	0	0	2	0	0	0	0	0	0	0	0	0	0	0	0	0	0	0.2	0	0	0	0	0	0	0	0	0	0	0	0	0	0	0.00205665	0	0
[truncated: 308 more columns]

## Sheet: MW average LCMS
						CHOL_CTRL					CHOL_Glioblastoma					CHOL_Lung					CHOL_Meningioma					CHOL_Mieloma					CHOL_Pancreas
						53.3525	75.3122	53.3829	102.562	85.0714	42.9832	58.9821	70.545	84.3412	83.4615	81.4863	73.2244	76.5062	75.3259	93.4127	64.5418	71.416	65.7546	66.9033	73.4036	50.6118	53.0609	49.2582	52.976	49.8701	69.5959	81.1638	72.1628	65.0185	32.4953
#	Identified Proteins (560)	Accession Number	Molecular Weight /kDa	pI	Taxonomy	CHOL_CTRL_1	CHOL_CTRL_2	CHOL_CTRL_3	CHOL_CTRL_4	CHOL_CTRL_5	CHOL_Glioblastoma_1	CHOL_Glioblastoma_2	CHOL_Glioblastoma_3	CHOL_Glioblastoma_4	CHOL_Glioblastoma_5	CHOL_Lung_1	CHOL_Lung_2	CHOL_Lung_3	CHOL_Lung_4	CHOL_Lung_5	CHOL_Meningioma_1	CHOL_Meningioma_2	CHOL_Meningioma_3	CHOL_Meningioma_4	CHOL_Meningioma_5	CHOL_Mieloma_1	CHOL_Mieloma_2	CHOL_Mieloma_3	CHOL_Mieloma_4	CHOL_Mieloma_5	CHOL_Pancreas_1	CHOL_Pancreas_2	CHOL_Pancreas_3	CHOL_Pancreas_4	CHOL_Pancreas_5
1	Apolipoprotein B-100 OS=Homo sapiens GN=APOB PE=1 SV=2	APOB_HUMAN	516	7.04	Homo Sapiens	0.00289416	0.00210999	0.00271809	0.00699775	0.00665264	0.0216419	0.0229628	0.0206381	0.0199106	0.0223506	0.00529561	0.00717082	0.00879355	0.048706	0.0533951	0.0256519	0.0264634	0.023708	0.0264505	0.0229629	0.0256046	0.0249934	0.0178875	0.0278082	0.0320302	0.00993752	0.00870107	0.00407384	0.0174185	0.00789272
2	Serum albumin OS=Homo sapiens GN=ALB PE=1 SV=2	ALBU_HUMAN	69	6.21	Homo Sapiens	0.0416485	0.0487078	0.0830891	0.0384159	0.0443833	0.0791893	0.0837263	0.0757422	0.0965378	0.106951	0.0335704	0.0437853	0.0522922	0.0212754	0.0225583	0.107228	0.109639	0.0846872	0.101613	0.0915534	0.0504513	0.0497805	0.0498738	0.0631778	0.0559499	0.0756764	0.0471539	0.0723656	0.070586	0.104362
3	Complement C3 OS=Homo sapiens GN=C3 PE=1 SV=2	CO3_HUMAN	187	6.34	Homo Sapiens	0.0170239	0.020038	0.015493	0.0196232	0.0173425	0.0199977	0.0124232	0.0118504	0.0225793	0.0256087	0.0206131	0.0241629	0.0271003	0.0282901	0.0249521	0.0138107	0.0130725	0.0128201	0.0166992	0.0182278	0.0176986	0.0173993	0.0174136	0.0230803	0.0222528	0.00899063	0.00709287	0.00708134	0.0253099	0.0188367		11	0.00482463	0.00393594	0.00421474	0.0104841	0.00982203	0.0242069	0.025118	0.0224421	0.0215734	0.0242033	0.0078345	0.010204
4	Complement C4-B OS=Homo sapiens GN=C4B PE=1 SV=2	CO4B_HUMAN	193	7.28	Homo Sapiens	0.00816641	0.00864801	0.0074681	0.00665762	0.00659947	0.00703593	0.00594667	0.00572791	0.00687458	0.00472001	0.00705651	0.00771616	0.0104103	0.00696335	0.0066808	0.0062871	0.00558714	0.00557029	0.00730816	0.00582514	0.00360336	0.00426302	0.00408705	0.00430442	0.00350083	0.00459159	0.00359673	0.00437849	0.0049406	0.00455603		34	0.0650406	0.0671636	0.0575812	0.0699654	0.0671362	0.0719509	0.0746515	0.0704144	0.0898312	0.0874032	0.0654991	0.0671497
5	Apolipoprotein A-I OS=Homo sapiens GN=APOA1 PE=1 SV=1	APOA1_HUMAN	31	5.5	Homo Sapiens	0.0286167	0.0197084	0.0394428	0.0164719	0.0161002	0.0730956	0.0617568	0.0592844	0.0803587	0.0718192	0.0149284	0.0186723	0.0220673	0.0414616	0.0380913	0.0541283	0.0551512	0.0527166	0.0594543	0.060118	0.0389717	0.0336367	0.0392623	0.0444709	0.0422715	0.0287556	0.0168389	0.0263613	0.0201527	0.0354883		72	0.093705	0.0986908	0.0837593	0.112198	0.108902	0.0921012	0.101967	0.0972356	0.118709	0.114583	0.0984955	0.0995332
6	Keratin, type II cytoskeletal 1 OS=Homo sapiens GN=KRT1 PE=1 SV=6	K2C1_HUMAN	66	8.33	Homo Sapiens	0.0217063	0.0197828	0.0211755	0.0218647	0.0187411	0.0156501	0.0140765	0.0148225	0.0185554	0.0254879	0.0311727	0.0231699	0.0142549	0.0151438	0.0130182	0.010876	0.00664893	0.00907256	0.0123771	0.0108013	0.0121982	0.0104699	0.0219389	0.0218433	0.0207548	0.0189101	0.00734702	0.00937109	0.0148066	0.00801311		110	0.13421	0.139033	0.121667	0.152736	0.14676	0.104049	0.118747	0.113723	0.141062	0.139112	0.129069	0.125556
7	Alpha-2-macroglobulin OS=Homo sapiens GN=A2M PE=1 SV=3	A2MG_HUMAN	163	6.43	Homo Sapiens	0.00130269	0.00203487	0.00371889	0.00392882	0.00422565	0.0102351	0.0140591	0.0133601	0.0180726	0.0127322	0.00241288	0.00368446	0.0029945	0.00397953	0.00444009	0.0116895	0.0148897	0.0073162	0.0116148	0.00852292	0.0057482	0.00546967	0.00485339	0.00537049	0.00525061	0.00704945	0.00503885	0.00622481	0.00634376	0.00612414		138	0.155078	0.16191	0.150784	0.181047	0.178035	0.138701	0.153588	0.147042	0.178097	0.178311	0.15702	0.154769
8	Myosin-9 OS=Homo sapiens GN=MYH9 PE=1 SV=4	MYH9_HUMAN	227	5.29	Homo Sapiens	0.0098526	0.00829127	0.00759487	0.00632298	0.00660883	0	0.00258953	0.00318488	0.00296062	0.00250185	0.00185572	0.000662006	0.000998137	0.000444925	0.000374668	0.000364011	0	0.00153865	0.00149335	0.00154308	0.00355282	0.00312442	0.00282547	0.00335736	0.00337761	0.00738195	0.00703351	0.00711472	0.0094495	0.00157621		186	0.29616	0.309125	0.323699	0.339634	0.335187	0.280759	0.29935	0.288016	0.341591	0.357478	0.32514	0.318762
9	Serotransferrin OS=Homo sapiens GN=TF PE=1 SV=3	TRFE_HUMAN	77	7.13	Homo Sapiens	0.007717	0.00770259	0.016228	0.00628142	0.00807647	0.0218013	0.0182137	0.0158348	0.019459	0.0229444	0.00621365	0.00987677	0.00876881	0.00568963	0.00612591	0.0192567	0.0248158	0.0256829	0.0262047	0.0219135	0.011844	0.010609	0.0114343	0.011444	0.0107266	0.0169288	0.0107215	0.017826	0.0127168	0.0159393		266	0.422228	0.434485	0.43614	0.485624	0.485177	0.348228	0.356823	0.343051	0.409408	0.424485	0.448027	0.439374
10	Fibrinogen alpha chain OS=Homo sapiens GN=FGA PE=1 SV=2	FIBA_HUMAN	95	5.87	Homo Sapiens	0.0236088	0.017099	0.0223554	0.00966074	0.00997491	0.000956113	0.00113421	0.00129345	0.00224611	0.003747	0.00452349	0.00196995	0.00472429	0.00228645	0.0020118	0.001304	0.000489973	0.000591208	0.000421504	0.000292423	0.0176877	0.0154055	0.0148706	0.0149652	0.015406	0.0136288	0.00968835	0.0155899	0.0131507	0.0164044		328	0.521082	0.549789	0.540541	0.578402	0.573048	0.450573	0.460042	0.45199	0.492382	0.509495	0.546668	0.541079
11	Apolipoprotein(a) OS=Homo sapiens GN=LPA PE=1 SV=1	APOA_HUMAN	501	5.77	Homo Sapiens	0.00108503	0.000795745	0.000798913	0.00144215	0.00163617	0.000139148	0.000747239	0.00026372	0.00038556	0.000685594	0.00069448	0.00157277	0.00177323	0.00535796	0.0060757	0.00103112	0.0018921	0.00103303	0.00133306	0.00116399	0.00325174	0.00307193	0.00221142	0.00269004	0.00305554	0.00239604	0.000655807	0.000332209	0.00291944	0.000873879		396	0.649488	0.681014	0.683228	0.701328	0.699602	0.648984	0.650575	0.648361	0.701451	0.704279	0.647088	0.667134
12	Apolipoprotein E OS=Homo sapiens GN=APOE PE=1 SV=1	APOE_HUMAN	36	5.42	Homo Sapiens	0.0218977	0.0191902	0.0221947	0.01529	0.0167775	0.0462307	0.0313481	0.0258612	0.0308397	0.0277449	0.0164913	0.0255408	0.026631	0.0143648	0.0129967	0.0207955	0.0259296	0.0218187	0.022697	0.0230371	0.0324732	0.0301677	0.0311604	0.0335235	0.0395761	0.0205161	0.0271796	0.017199	0.02772	0.0320038		470	0.705282	0.755372	0.735168	0.78132	0.777333	0.709227	0.703082	0.696418	0.73701	0.747699	0.72412	0.733284
13	Fibrinogen beta chain OS=Homo sapiens GN=FGB PE=1 SV=2	FIBB_HUMAN	56	8.38	Homo Sapiens	0.0282469	0.0278282	0.0281966	0.0188726	0.0183322	0.00150977	0.000532906	0.000591227	0.00218225	0.000860382	0.00855068	0.00236095	0.00778338	0.0041714	0.00385822	0.00101951	0.00125092	0	0.0003587	0.000893937	0.028602	0.0252384	0.0270919	0.0286498	0.032335	0.0244459	0.0164994	0.0244042	0.0235409	0.031578		560	1	1	1	1	1	1	1	1	1	1	1	1
14	Filamin-A OS=Homo sapiens GN=FLNA PE=1 SV=4	FLNA_HUMAN	281	5.95	Homo Sapiens	0.00414222	0.00406215	0.00253442	0.00328321	0.0034449	0	0.00191928	0.00149648	0.00177315	0.00119249	0.00279643	0.00230082	0.00172187	0.000236231	0.000255193	0.00150814	0.00102509	0.00156792	0.00182647	0.0017167	0.00228054	0.00234668	0.00179592	0.00221948	0.00261841	0.00400501	0.00388935	0.00394685	0.0051675	0.00150228
15	Keratin, type I cytoskeletal 9 OS=Homo sapiens GN=KRT9 PE=1 SV=3	K1C9_HUMAN	62	4.89	Homo Sapiens	0.020144	0.0153609	0.0203472	0.0168485	0.0119323	0.00958097	0.00834588	0.00876149	0.0105136	0.00876154	0.0215515	0.017321	0.0104637	0.0101931	0.00921686	0.00566176	0.00368836	0.00574098	0.0087617	0.00973822	0.00779537	0.00668472	0.0151282	0.00994846	0.0144709	0.0109841	0.00397159	0.00536118	0.00690288	0.0043817
16	Alpha-1-antitrypsin OS=Homo sapiens GN=SERPINA1 PE=1 SV=3	A1AT_HUMAN	47	5.31	Homo Sapiens	0.0061177	0.0075419	0.0124929	0.00812932	0.00924323	0.0181699	0.0148261	0.0144728	0.00579662	0.0108054	0.0124507	0.0166512	0.0155784	0.0309624	0.0271415	0.018678	0.0172307	0.0156545	0.0200359	0.0191457	0.0101031	0.0119073	0.00772873	0.00936756	0.0109522	0.0121225	0.0139832	0.011406	0.0107537	0.0186359
17	Haptoglobin OS=Homo sapiens GN=HP PE=1 SV=1	HPT_HUMAN	45	6.56	Homo Sapiens	0.00666058	0.00590761	0.0117896	0.00702482	0.00827942	0.0177879	0.0220365	0.0225875	0.0108878	0.0154306	0.0136379	0.0164833	0.0246861	0.0139976	0.0129342	0.0157285	0.015798	0.0305425	0.0314591	0.0258562	0.0134082	0.0115783	0.0101385	0.013692	0.0156312	0.0179041	0.0206336	0.0154052	0.0125181	0.0248488
18	Talin-1 OS=Homo sapiens GN=TLN1 PE=1 SV=3	TLN1_HUMAN	270	5.94	Homo Sapiens	0.00488253	0.00380482	0.00342919	0.0031238	0.0030795	0	0.00202324	0.00173199	0.00325089	0.00245619	0.00276965	0.00215772	0.00208274	7.97801e-05	0.000117631	0.00158699	0.00100009	0.00185484	0.00191905	0.00221855	0.00274937	0.00256115	0.00233127	0.0020712	0.00252537	0.00415187	0.00417879	0.00427282	0.00383208	0.0012351
19	Ig gamma-1 chain C region OS=Homo sapiens GN=IGHG1 PE=1 SV=1	IGHG1_HUMAN	36	8.31	Homo Sapiens	0.00745904	0.0111992	0.0128491	0.0105844	0.0114056	0.0206841	0.0155073	0.015868	0.014923	0.0119737	0.0072723	0.0101203	0.00775309	0.00884083	0.0100206	0.0177955	0.0200859	0.0185735	0.0217234	0.0213571	0.0454776	0.0561808	0.0439661	0.0376734	0.0415836	0.011966	0.0208744	0.0223709	0.0127795	0.0247675				CHOL_CTRL					CHOL_Glioblastoma					CHOL_Lung
20	Complement factor H OS=Homo sapiens GN=CFH PE=1 SV=4	CFAH_HUMAN	139	6.59	Homo Sapiens	0.00475643	0.00470599	0.00508749	0.00626849	0.00624577	0.00373993	0.00525017	0.00547056	0.00500921	0.00379515	0.00415279	0.00612674	0.00514241	0.00298914	0.00331004	0.00568359	0.00676129	0.00507739	0.00573573	0.00539791	0.00416394	0.00361884	0.003588	0.00475242	0.00362108	0.00319845	0.00295169	0.00385843	0.00274901	0.00442361			N° prot	CHOL_CTRL_1	CHOL_CTRL_2	CHOL_CTRL_3	CHOL_CTRL_4	CHOL_CTRL_5	CHOL_Glioblastoma_1	CHOL_Glioblastoma_2	CHOL_Glioblastoma_3	CHOL_Glioblastoma_4	CHOL_Glioblastoma_5	CHOL_Lung_1
21	Fibronectin OS=Homo sapiens GN=FN1 PE=1 SV=4	FINC_HUMAN	263	5.45	Homo Sapiens	0.00116208	0.00132864	0.000925228	0.00229675	0.00242927	0.00259191	0.00296777	0.0019939	0.00245096	0.00256652	0.00186602	0.000519445	0.0016888	0.00203929	0.00181638	0.00465377	0.00104474	0.00152451	0.00483004	0.0030403	0.00464479	0.00501764	0.00545336	0.0054057	0.0055649	0.00172767	0.00062444	0.00105253	0.00270398	0.00108364		>300	11	0.00482463	0.00393594	0.00421474	0.0104841	0.00982203	0.0242069	0.025118	0.0224421	0.0215734	0.0242033	0.0078345
22	Fibrinogen gamma chain OS=Homo sapiens GN=FGG PE=1 SV=3	FIBG_HUMAN	52	5.32	Homo Sapiens	0.0194693	0.0175318	0.0194529	0.014204	0.0147895	0	0.00019652	0.000726265	0.00280776	0.0016085	0.00502741	0.00114031	0.00444286	0.00307043	0.00282561	0.0008956	0	0.000882182	0.000479247	0.00182146	0.020023	0.0202903	0.0192705	0.0149918	0.0180141	0.0170477	0.0108165	0.0169644	0.0165323	0.0278013		150-300	23	0.060216	0.0632277	0.0533665	0.0594813	0.0573142	0.047744	0.0495335	0.0479723	0.0682577	0.0631999	0.0576646
23	C4b-binding protein alpha chain OS=Homo sapiens GN=C4BPA PE=1 SV=2	C4BPA_HUMAN	67	7.31	Homo Sapiens	0.00821519	0.0133595	0.00960622	0.00904287	0.00929767	0.00551655	0.00666596	0.00613422	0.00483277	0.00536455	0.0105072	0.00876712	0.0117064	0.0114373	0.0103933	0.00654929	0.00438438	0.00962346	0.0111477	0.0108583	0.00611122	0.00515107	0.00505243	0.00779686	0.00667573	0.00515717	0.00410163	0.00585436	0.00520272	0.00733009		100-150	38	0.0286644	0.0315272	0.0261781	0.0422325	0.041766	0.0201504	0.0273155	0.0268212	0.0288777	0.0271798	0.0329965
24	Ig mu chain C region OS=Homo sapiens GN=IGHM PE=1 SV=3	IGHM_HUMAN	49	6.77	Homo Sapiens	0.0145309	0.0192392	0.0163058	0.00880007	0.00742597	0.0123712	0.0111395	0.0146539	0.0159695	0.0113251	0.0106976	0.0065091	0.00791434	0.00435165	0.00355647	0.00684762	0.00343103	0.0171785	0.0137217	0.0124107	0.00395753	0.00346134	0.00857561	0.00848413	0.00696519	0.0127974	0.0196025	0.0135897	0.0141287	0.00975215		80-100	38	0.0405048	0.0403421	0.0379079	0.0405384	0.0378575	0.0119473	0.0167796	0.0164869	0.0223528	0.0245286	0.0305738
25	Apolipoprotein A-IV OS=Homo sapiens GN=APOA4 PE=1 SV=3	APOA4_HUMAN	45	5.05	Homo Sapiens	0.00969673	0.00856666	0.0117748	0.00673176	0.00678418	0.0240837	0.0122489	0.00945292	0.0135175	0.0118974	0.00780717	0.00587422	0.014619	0.0130298	0.0124378	0.0138833	0.00860689	0.0104793	0.01505	0.013543	0.0156797	0.0114367	0.0124993	0.0130023	0.0133211	0.00787519	0.00264954	0.00739706	0.00416517	0.00970082		70-80	28	0.0208678	0.0228771	0.0291167	0.0283104	0.0312752	0.0346525	0.0348413	0.0333198	0.0370349	0.0391992	0.0279503
26	Complement component C9 OS=Homo sapiens GN=C9 PE=1 SV=2	CO9_HUMAN	63	5.27	Homo Sapiens	0.00923008	0.00878659	0.00704991	0.0064006	0.00673608	0.00650245	0.00474053	0.00472356	0.00596118	0.00482537	0.0107639	0.0117045	0.0182567	0.00776355	0.00694658	0.00287452	0.0024426	0.00426999	0.00521606	0.00647661	0.00631178	0.00529045	0.00728249	0.00568007	0.00539869	0.00631774	0.00423855	0.0054266	0.0094731	0.00754336		60-70	48	0.141083	0.147215	0.172915	0.158587	0.157152	0.142058	0.145762	0.140974	0.163495	0.179168	0.16812
27	Clusterin OS=Homo sapiens GN=CLU PE=1 SV=1	CLUS_HUMAN	52	6.21	Homo Sapiens	0.0103378	0.00612971	0.00910209	0.00641481	0.00603146	0.00774798	0.00810285	0.00717543	0.00532722	0.00644596	0.00732281	0.00587801	0.0113128	0.00713325	0.00793289	0.00813564	0.00522359	0.0107445	0.0127451	0.0103315	0.00844446	0.00580049	0.0103447	0.00398505	0.00589854	0.00534208	0.00419737	0.005141	0.00841347	0.00937863		50-60	80	0.126068	0.12536	0.112441	0.14599	0.14999	0.0674692	0.0574733	0.0550346	0.0678171	0.0670064	0.122888
28	Actin, cytoplasmic 1 OS=Homo sapiens GN=ACTB PE=1 SV=1	ACTB_HUMAN	42	5.15	Homo Sapiens	0.0224875	0.0140205	0.0150067	0.0101161	0.00987183	0.00204522	0.00806098	0.00798843	0.00714837	0.00447761	0.0114997	0.00932516	0.00944432	0.00264288	0.00288042	0.00639469	0.00434192	0.00518766	0.0100868	0.00919692	0.00930799	0.00852794	0.00870361	0.00929937	0.0105452	0.0119726	0.0123242	0.013411	0.0129973	0.00797033		40-50	62	0.0988536	0.115304	0.104401	0.0927783	0.0878709	0.102345	0.103219	0.10894	0.0829733	0.0850108	0.0986412
29	Keratin, type I cytoskeletal 10 OS=Homo sapiens GN=KRT10 PE=1 SV=6	K1C10_HUMAN	59	4.88	Homo Sapiens	0.00635682	0.00757482	0.00583764	0.0112146	0.0102431	0.00798801	0.00454439	0.0044835	0.00609927	0.00548407	0.0162576	0.0128036	0.00753221	0.00713605	0.00584618	0.00498946	0.0032556	0.00352959	0.00548827	0.00500089	0.00648834	0.00521838	0.00644038	0.00885113	0.0105413	0.007077	0.00362499	0.00353	0.0065236	0.00468543		30-40	68	0.128406	0.131226	0.142687	0.122926	0.126554	0.198411	0.190533	0.196371	0.20907	0.194783	0.10042
30	Keratin, type II cytoskeletal 2 epidermal OS=Homo sapiens GN=KRT2 PE=1 SV=2	K22E_HUMAN	65	8.17	Homo Sapiens	0.0120241	0.00789794	0.00824446	0.011186	0.00857386	0.00973408	0.0051828	0.00559787	0.00626402	0.00516588	0.0142452	0.012953	0.0091801	0.00748369	0.00585928	0.00524609	0.00389027	0.00436775	0.00398673	0.00356917	0.00664727	0.00493218	0.00970441	0.0086963	0.00863251	0.00780257	0.00303086	0.00391158	0.0080626	0.00393655		20-30	74	0.0557938	0.0743575	0.05194	0.0799927	0.0777315	0.0602428	0.052507	0.0480575	0.0355582	0.04342	0.0770314
31	Ig kappa chain C region OS=Homo sapiens GN=IGKC PE=1 SV=1	IGKC_HUMAN	12	5.68	Homo Sapiens	0.0286757	0.0279935	0.0312124	0.0298621	0.0280573	0.0243215	0.0324496	0.0334734	0.0316641	0.0276068	0.0215018	0.0231255	0.0148591	0.0205526	0.0288871	0.0435389	0.0373605	0.035429	0.023675	0.0193946	0.0729102	0.0607354	0.056307	0.0476943	0.0395015	0.0227089	0.0308041	0.0288419	0.0314739	0.0376072		<20	90	0.294718	0.244628	0.264832	0.21868	0.222667	0.290773	0.296918	0.303582	0.26299	0.252301	0.27588
32	Complement C5 OS=Homo sapiens GN=C5 PE=1 SV=4	CO5_HUMAN	188	6.49	Homo Sapiens	0.000531794	0.00216079	0.000631996	0.00230087	0.0021075	0.00215764	0.00153349	0.00140731	0.00220589	0.00267596	0.00357086	0.00306907	0.00250083	0.00307521	0.00276569	0.0017852	0.00124039	0.00191836	0.00174902	0.00152347	0.00112843	0.00156846	0.00122582	0.00150115	0.00223924	0.000557608	0.000457985	0.000417528	0.00124055	0.00116151		tot	560	1	1	1	1	1	1	1	1	1	1	1
33	Ig alpha-1 chain C region OS=Homo sapiens GN=IGHA1 PE=1 SV=2	IGHA1_HUMAN	38	6.49	Homo Sapiens	0.00821533	0.00559867	0.00807783	0.00481908	0.00504388	0.00938428	0.0161139	0.0177866	0.0163252	0.018067	0.00387233	0.00671051	0.00538916	0.0070641	0.00778836	0.0254181	0.0352509	0.0123953	0.0132206	0.010779	0.00299078	0.00248218	0.00392235	0.00148242	0.00459757	0.0113527	0.0110293	0.011655	0.0105596	0.00909794
34	Thrombospondin-1 OS=Homo sapiens GN=THBS1 PE=1 SV=2	TSP1_HUMAN	129	4.51	Homo Sapiens	0.00309947	0.00404822	0.00304609	0.00355526	0.00363952	0.000550894	0.00175285	0.00216255	0.003859	0.0032826	0.0012681	0.00081148	0.0021299	0.00360274	0.00325576	0.00067976	0.000357278	0.00216261	0.00251162	0.00232821	0.00124184	0.00126893	0.00104802	0.000922084	0.000521368	0.00505332	0.0044571	0.00472617	0.00439898	0.000780404
35	Plasminogen OS=Homo sapiens GN=PLG PE=1 SV=2	PLMN_HUMAN	91	7.25	Homo Sapiens	0.00219866	0.00383741	0.0021923	0.00431228	0.00401537	0.00288081	0.00330223	0.00342647	0.00395359	0.00482815	0.00282706	0.00405656	0.00378375	0.00315438	0.0035529	0.00357538	0.00425868	0.00386208	0.00416139	0.00345947	0.00626728	0.00593476	0.0064099	0.00422454	0.00435965	0.00347698	0.00198153	0.00345905	0.00228053	0.00415812
36	Inter-alpha-trypsin inhibitor heavy chain H2 OS=Homo sapiens GN=ITIH2 PE=1 SV=2	ITIH2_HUMAN	106	6.85	Homo Sapiens	0.00254122	0.00166789	0.0027665	0.00324146	0.00303464	0.00387328	0.00364625	0.0036552	0.0035039	0.00395465	0.00115469	0.00163315	0.00230108	0.00237382	0.00225764	0.00335648	0.00387558	0.00401081	0.00390344	0.00301867	0.00332848	0.00331489	0.00363426	0.00398047	0.00334808	0.00289552	0.00104786	0.00304412	0.00377927	0.00595085
37	von Willebrand factor OS=Homo sapiens GN=VWF PE=1 SV=4	VWF_HUMAN	309	5.15	Homo Sapiens	0.000630101	0.000658992	0.00030236	0.00107788	0.000959959	0.00242587	0.00110424	0.0011161	0.00118943	0.00103487	0.000319112	0.000102676	0.000873832	0.00293745	0.00252639	0.000584546	0.000184322	0.000771382	0.000500643	0.000484404	0.000767355	0.000934018	0.000746736	0.00114137	0.0011258	0.000680346	0.00105061	0.000625173	0.000838812	0.000490573
38	Inter-alpha-trypsin inhibitor heavy chain H4 OS=Homo sapiens GN=ITIH4 PE=1 SV=4	ITIH4_HUMAN	103	6.97	Homo Sapiens	0.00163764	0.00141779	0.00242721	0.00305668	0.00303516	0.00316064	0.00213542	0.00197142	0.00257317	0.00263704	0.00393374	0.00478006	0.00583931	0.00275903	0.00233417	0.0015549	0.00149845	0.00206752	0.00232749	0.00268872	0.00270468	0.00268764	0.00308988	0.00398192	0.0042928	0.00331076	0.0024711	0.00286814	0.00319603	0.00526336
39	Gelsolin OS=Homo sapiens GN=GSN PE=1 SV=1	GELS_HUMAN	86	6.19	Homo Sapiens	0.00443269	0.0043765	0.00413695	0.00598708	0.00456493	0.00154773	0.00239484	0.00214347	0.00432181	0.0032077	0.00328579	0.00349141	0.00455988	0.0016488	0.00119373	0.00258441	0.002173	0.00181809	0.00220198	0.00321688	0.00720833	0.00628337	0.00765471	0.00657278	0.00652457	0.00289647	0.00176843	0.0026836	0.00373352	0.00375231
40	Ceruloplasmin OS=Homo sapiens GN=CP PE=1 SV=1	CERU_HUMAN	122	5.5	Homo Sapiens	0.000204207	0.000943884	0.00169558	0.00152272	0.00141312	0.00346832	0.00423908	0.00402826	0.00430662	0.0039602	0.00207768	0.002276	0.00239299	0.00433998	0.00403034	0.00330133	0.00299327	0.00461912	0.00428802	0.00498913	0.00122482	0.000926065	0.00115746	0.000620922	0.000602206	0.0032932	0.00255845	0.00291528	0.00272975	0.00343925
41	Coagulation factor V OS=Homo sapiens GN=F5 PE=1 SV=4	FA5_HUMAN	252	5.95	Homo Sapiens	0.00141519	0.0016158	0.000917793	0.00137499	0.00150477	0	0.000388124	0.00043156	0.000863497	0.00112436	0.00126827	0.0013019	0.000691416	0.000915361	0.000955939	0.000348159	0.000277978	0.000400609	0.000354478	0.000719412	0	4.9969e-05	5.15559e-05	0.000451536	0.000530467	0.0021638	0.00182358	0.0012441	0.0034021	0.0042555
42	Vitamin D-binding protein OS=Homo sapiens GN=GC PE=1 SV=1	VTDB_HUMAN	53	5.21	Homo Sapiens	0.0018851	0.0033358	0.00401722	0.00400299	0.00463341	0.00496354	0.00711245	0.00855497	0.00723252	0.00625469	0.00354954	0.00540837	0.00460552	0.00156854	0.0021539	0.00877567	0.0111284	0.00861853	0.00986806	0.0105565	0.00539618	0.00332179	0.00409038	0.00736932	0.00895753	0.00603117	0.00464698	0.00643859	0.00617867	0.00587994
43	Prothrombin OS=Homo sapiens GN=F2 PE=1 SV=2	THRB_HUMAN	70	5.7	Homo Sapiens	0.00133828	0.00195588	0.00178344	0.00381133	0.0042237	0.00583288	0.00623999	0.00668362	0.00530965	0.00633428	0.00408825	0.00493904	0.00529184	0.00505738	0.0048351	0.00523351	0.00505501	0.00573397	0.00313368	0.00273376	0.0019516	0.00286824	0.00310385	0.000989929	0.00104502	0.00307955	0.00134856	0.0028991	0.00255115	0.00202742
44	Lipopolysaccharide-binding protein OS=Homo sapiens GN=LBP PE=1 SV=3	LBP_HUMAN	53	6.68	Homo Sapiens	0.00495759	0.00334226	0.00330282	0.00409306	0.00436265	0.0037082	0.00240387	0.00115766	0.00298025	0.00377018	0.00672161	0.00815833	0.014721	0.00602418	0.00444135	0.00223854	0.00211471	0.00181793	0.00469853	0.00295224	0.00348739	0.00379113	0.00371545	0.00188623	0.00214925	0.00433744	0.00504488	0.00261401	0.00684972	0.0166872
45	Keratin, type I cytoskeletal 16 OS=Homo sapiens GN=KRT16 PE=1 SV=4	K1C16_HUMAN	51	4.69	Homo Sapiens	0.00747604	0.00823991	0.00597896	0.00962422	0.0104272	0.00643701	0.00856825	0.00963714	0.0123255	0.0118956	0.013737	0.0126746	0.00734956	0.00773916	0.00494686	0.00313606	0.00238376	0.00268357	0.00478086	0.00365839	0.00433874	0.00356721	0.00849405	0	0.00053249	0.00563648	0.00185274	0.00244545	0.00331649	0.00290046
46	Serum amyloid A-2 protein OS=Homo sapiens GN=SAA2 PE=1 SV=1	SAA2_HUMAN	14	9.48	Homo Sapiens	0	0	0	0.00186581	0.00251577	0.0072918	0.00590997	0.00573933	0.00846128	0.00483053	0.0113876	0.00974056	0.0136908	0.102226	0.111201	0.00480139	0.00334122	0.01012	0.0238436	0.0160664	0	0.00361965	0	0.0134686	0.012853	0.00821056	0.0284211	0.00331278	0.0277548	0.00537246
47	Apolipoprotein C-III OS=Homo sapiens GN=APOC3 PE=1 SV=1	APOC3_HUMAN	11	5.04	Homo Sapiens	0.0431962	0.0305591	0.0472025	0.0215432	0.0196088	0.0188033	0.0121179	0.0145939	0.0161484	0.0155853	0.0260326	0.0264885	0.0261519	0.0185471	0.0171655	0.0122021	0.00973675	0.0174983	0.00365494	0.00903035	0.0343745	0.0371192	0.0326414	0.0103155	0.0127108	0.0257161	0.014931	0.0282102	0.0208103	0.02734
48	Integrin alpha-IIb OS=Homo sapiens GN=ITGA2B PE=1 SV=3	ITA2B_HUMAN	113	5.03	Homo Sapiens	0.00398274	0.00372226	0.00337406	0.00380183	0.00416695	0	0.00179363	0.00129612	0.00227287	0.00332126	0.00326127	0.00245872	0.00157974	0	0	0.00168882	0.00102981	0.00129935	0.00167664	0.00133663	0.0022804	0.00216645	0.0020182	0.000164303	0.000355073	0.00288276	0.00265247	0.00273496	0.00316592	0.00108377
49	Integrin beta-3 OS=Homo sapiens GN=ITGB3 PE=1 SV=2	ITB3_HUMAN	87	4.85	Homo Sapiens	0.00430639	0.00483817	0.0037967	0.00470774	0.00472897	0	0.00166891	0.00130349	0.00267859	0.0033031	0.00357373	0.00240791	0.00170138	0	0	0.00142682	0.000750632	0.00134154	0.0033219	0.00251588	0.00250436	0.0026758	0.00209536	0.00239511	0.00160401	0.00434315	0.00373116	0.00408719	0.0054209	0.00117046
50	Ig gamma-3 chain C region OS=Homo sapiens GN=IGHG3 PE=1 SV=2	IGHG3_HUMAN	41	7.95	Homo Sapiens	0.00792606	0.0120799	0.0136831	0.00731741	0.0084992	0.0108578	0.0109021	0.0123349	0.00944077	0.0133473	0.00389766	0.00845158	0.0046762	0.0058415	0.0056432	0.016625	0.0292377	0.0162122	0.0165269	0.0154042	0.00422004	0.0142435	0.0148442	0.0119734	0.012549	0.012021	0.0174339	0.0164544	0.0127019	0.0185791
51	Kininogen-1 OS=Homo sapiens GN=KNG1 PE=1 SV=2	KNG1_HUMAN	72	6.8	Homo Sapiens	0.00364662	0.00399972	0.00417442	0.00244107	0.00255371	0.00269157	0.00330983	0.00334779	0.00373494	0.00260702	0.00391428	0.00392627	0.00514204	0.00178106	0.0018592	0.00322824	0.00258599	0.003233	0.00290855	0.00259666	0.00319025	0.00270433	0.0026341	0	0	0.00346151	0.00318821	0.00390661	0.00193461	0.00328594
52	Ig lambda-2 chain C regions OS=Homo sapiens GN=IGLC2 PE=1 SV=1	LAC2_HUMAN	11	7.34	Homo Sapiens	0.0210319	0.0209648	0.0282999	0.0118743	0.0134919	0.0257918	0.0301723	0.0369442	0.0337887	0.0450661	0.0149052	0.0149145	0.010317	0.0189492	0.0181972	0.0403912	0.0330731	0.0335933	0.0353483	0.0331053	0.00653157	0.00571308	0.0177709	0.00286193	0	0.0200663	0.0320627	0.0289319	0.0227974	0.0195117
53	Hornerin OS=Homo sapiens GN=HRNR PE=1 SV=2	HORN_HUMAN	282	10.24	Homo Sapiens	0.00194859	0.00117659	0.0020795	0.00129149	0.000689206	0.000476799	0.000623912	0.000886999	0.00106461	0.00103254	0.00150713	0.00114589	0.000912117	0.00025066	0.000377573	0.000165313	9.93623e-05	0.000233344	0.000210854	0.000255511	0.000294296	0.00013273	0.000593229	0.000222828	0.000237455	0.000713704	0.000161131	0.000278075	0.000297122	0.000128917
54	Apolipoprotein A-II OS=Homo sapiens GN=APOA2 PE=1 SV=1	APOA2_HUMAN	11	6.6	Homo Sapiens	0.0261631	0.016919	0.02328	0.0147302	0.0135524	0.0470601	0.0353744	0.0300775	0.0345022	0.0298039	0.0104057	0.0157225	0.0150392	0.016903	0.0160883	0.0295978	0.0365462	0.0202357	0.0149212	0.0202704	0.0243467	0.0256791	0.0209416	0.00629955	0.00726839	0.0139364	0.011205	0.0118119	0.0158713	0.0227113
55	Vitronectin OS=Homo sapiens GN=VTN PE=1 SV=1	VTNC_HUMAN	54	5.54	Homo Sapiens	0.00312488	0.00303932	0.00335227	0.00257543	0.00275993	0.00524576	0.004815	0.00358994	0.00482971	0.00354639	0.00408574	0.00438539	0.00597917	0.00304729	0.0030396	0.00496965	0.00439359	0.00591645	0.00376377	0.00563322	0.00528993	0.00395982	0.00434534	0.00207268	0.00523386	0.00425264	0.00334452	0.00341357	0.00364869	0.00395403
56	Apolipoprotein D OS=Homo sapiens GN=APOD PE=1 SV=1	APOD_HUMAN	21	4.79	Homo Sapiens	0.00625294	0.00274629	0.0074278	0.0065337	0.00729204	0.0222494	0.0176575	0.0146293	0.0135405	0.0148314	0.00582888	0.0119292	0.00684257	0.0128559	0.0110418	0.0140238	0.0241015	0.0139886	0.00690712	0.00172298	0.0214249	0.0206389	0.0158469	0.00659953	0.00570387	0.00682793	0.00938988	0.00550429	0.00862321	0.00450463
57	Inter-alpha-trypsin inhibitor heavy chain H1 OS=Homo sapiens GN=ITIH1 PE=1 SV=3	ITIH1_HUMAN	101	6.78	Homo Sapiens	0.000868477	0.00114202	0.000987359	0.00314068	0.00290526	0.00314799	0.00258226	0.0021048	0.00175812	0.00150022	0.00113339	0.00131066	0.0021983	0.00228126	0.0020882	0.00194346	0.00184348	0.00276429	0.00167495	0.00166394	0.00248781	0.00254967	0.00296381	0.000123499	0.000134205	0.00203989	0.000812624	0.00274424	0.00235608	0.00401018
58	Complement factor B OS=Homo sapiens GN=CFB PE=1 SV=2	CFAB_HUMAN	86	7.07	Homo Sapiens	0.00122959	0.00118189	0.0020395	0.0016293	0.00200102	0.00294931	0.00253516	0.00192515	0.00229863	0.00153014	0.00190209	0.00323161	0.00232818	0.00231731	0.00219328	0.00306307	0.00428282	0.00305806	0.0019024	0.00307325	0.00170202	0.001757	0.00180867	0.00102845	0.00163005	0.00234336	0.00281205	0.00251957	0.00283398	0.00310146
59	Hemopexin OS=Homo sapiens GN=HPX PE=1 SV=2	HEMO_HUMAN	52	7.02	Homo Sapiens	0.00191878	0.00169997	0.00516204	0.00239003	0.00286459	0.00673615	0.0037568	0.0033629	0.0042635	0.00451559	0.00298216	0.0032333	0.00343274	0.00433064	0.00507874	0.00456046	0.00410177	0.00516698	0.00364346	0.0029046	0.00327566	0.00351487	0.00298941	0.00156915	0.00245125	0.00525162	0.00474157	0.00514931	0.00493929	0.0061812
60	Ig gamma-2 chain C region OS=Homo sapiens GN=IGHG2 PE=1 SV=2	IGHG2_HUMAN	36	7.66	Homo Sapiens	0.00815636	0.0158569	0.0145236	0.00828209	0.010346	0.0124906	0.0131076	0.0150864	0.0140582	0.00976552	0.00659605	0.0105159	0.00375889	0.00576928	0.00650905	0.022809	0.0302151	0.0184064	0.0228442	0.0241018	0.00707403	0.00961341	0.00668846	0.0068215	0.00536675	0.0127543	0.0193936	0.0167731	0.0143582	0.0153657
61	Beta-2-glycoprotein 1 OS=Homo sapiens GN=APOH PE=1 SV=3	APOH_HUMAN	38	8.03	Homo Sapiens	0.00626231	0.00453503	0.00361086	0.00429823	0.00391688	0.00287587	0.00395258	0.00310962	0.00342939	0.00262293	0.00205281	0.00345969	0.00252024	0.00371762	0.00540049	0.00598008	0.00875353	0.00507395	0.00747364	0.00704039	0.00259176	0.0031358	0.00355774	0.00479471	0.00281092	0.00619205	0.00506752	0.00691336	0.0123172	0.0131499
62	Histidine-rich glycoprotein OS=Homo sapiens GN=HRG PE=1 SV=1	HRG_HUMAN	60	7.52	Homo Sapiens	0.00353135	0.00509737	0.00363652	0.00585368	0.00653197	0.00206861	0.00388025	0.00259981	0.00105574	0.00226039	0.00373984	0.00418075	0.00370458	0.0028109	0.00272718	0.00430093	0.0039734	0.00202374	0.00315497	0.00361583	0.00111852	0.000946943	0.00111463	0.00221037	0.00266389	0.00192001	0.000549109	0.00115092	0.00148914	0.00327537
63	Alpha-2-HS-glycoprotein OS=Homo sapiens GN=AHSG PE=1 SV=1	FETUA_HUMAN	39	5.52	Homo Sapiens	0.00833081	0.00704938	0.00993061	0.0050883	0.00521159	0.00438165	0.00404578	0.00314776	0.00324331	0.00184332	0.00293998	0.00549704	0.00301773	0.00215602	0.00156334	0.00648565	0.00999978	0.00506458	0.00651617	0.00618544	0.00655569	0.00645045	0.0067345	0.000319831	0.00243656	0.00391781	0.00337913	0.00663478	0.0035103	0.0079622
64	Apolipoprotein L1 OS=Homo sapiens GN=APOL1 PE=1 SV=5	APOL1_HUMAN	44	5.55	Homo Sapiens	0.00156591	0.00201425	0.00183372	0.00190733	0.00185002	0.00259578	0.00763233	0.00784292	0.00592531	0.00753718	0.000463474	0.00185823	0.00346592	0.00493299	0.00488007	0.00786189	0.0187459	0.00497412	0.00520076	0.00516117	0.00384079	0.00370981	0.00522014	0.00328759	0.00302982	0.00436038	0.0019645	0.00252564	0.00517946	0.00245346
65	Heparin cofactor 2 OS=Homo sapiens GN=SERPIND1 PE=1 SV=3	HEP2_HUMAN	57	6.89	Homo Sapiens	0.0036125	0.00201824	0.0031894	0.00535193	0.0054429	0.00354218	0.000794906	0.000831458	0.00208281	0.00111979	0.00265777	0.0039142	0.00389864	0.0030896	0.00219476	0.000727633	0.000915966	0.00240678	0.00296935	0.00302731	0.00384011	0.00429964	0.00522475	0.00341362	0.00565881	0.00243621	0.000866219	0.00234049	0.00305259	0.00717128
66	Keratin, type II cytoskeletal 6C OS=Homo sapiens GN=KRT6C PE=1 SV=3	K2C6C_HUMAN	60	8.16	Homo Sapiens	0.00593616	0.00494788	0.00511017	0.00719114	0.00818322	0.00341015	0.00515374	0.00638001	0.00626162	0.00465718	0.00894699	0.0075803	0.00406437	0.00485688	0.00382213	0.00327087	0.00226352	0.00270613	0.00389046	0.00395231	0.00306929	0.00314282	0.00721835	0.00431023	0.00310179	0.00492874	0.0011733	0.00246117	0.00378392	0.000970712
67	Serum paraoxonase/arylesterase 1 OS=Homo sapiens GN=PON1 PE=1 SV=3	PON1_HUMAN	40	4.89	Homo Sapiens	0.0034369	0.00177291	0.00266108	0.00331861	0.00304921	0.00636201	0.00684149	0.00708788	0.00592489	0.00369	0.00142148	0.00239282	0.00239403	0.00553136	0.00571041	0.00749343	0.0114112	0.00557571	0.00286056	0.00215845	0.0062734	0.00564611	0.00439501	0.00157766	0.00486128	0.00564036	0.0048313	0.0028878	0.00601074	0.0102498
68	Complement component C6 OS=Homo sapiens GN=C6 PE=1 SV=3	CO6_HUMAN	105	6.74	Homo Sapiens	0.002139	0.00244967	0.00208182	0.00244527	0.00264972	0.00104079	0.00100376	0.000899703	0.000943461	0.000990942	0.00424931	0.00355643	0.00310917	0.000293295	0.000380954	0.000786508	0.000531531	0.0012075	0.00146791	0.00116776	0.0015612	0.0017948	0.00160603	0.000361321	0.00160168	0.00077543	0.000193197	0.000657666	0.000461474	0.000588686
69	Hemoglobin subunit beta OS=Homo sapiens GN=HBB PE=1 SV=2	HBB_HUMAN	16	7.32	Homo Sapiens	0.0155737	0.0121781	0.0152301	0.00793345	0.0100193	0.0120846	0.00565506	0.00768652	0.00739543	0.00473824	0.017909	0.0185119	0.0236989	0.0063591	0.00582737	0.0135615	0.0111152	0.0123585	0.00405201	0.00797742	0.00411073	0.00511061	0.00463382	0.0177136	0.0142174	0.0110602	0.00823664	0.0161404	0.00648033	0.0181196
70	Complement C1r subcomponent OS=Homo sapiens GN=C1R PE=1 SV=2	C1R_HUMAN	80	6.14	Homo Sapiens	0.00101123	0.00127529	0.00102124	0.00162622	0.00142269	0.00225389	0.0013486	0.00106385	0.0016311	0.00114639	0.00353222	0.00318953	0.00327106	0.00205564	0.00197024	0.0011617	0.000934949	0.00107574	0.00161879	0.00216501	0.00164013	0.00157157	0.00176274	0.00267772	0.00294013	0.00257385	0.00281971	0.00323445	0.00478324	0.00633869
71	Spectrin alpha chain, erythrocytic 1 OS=Homo sapiens GN=SPTA1 PE=1 SV=5	SPTA1_HUMAN	280	4.69	Homo Sapiens	4.54252e-05	3.10807e-05	0	0.000382678	0.000375277	0	0.000266594	0	0.000169738	7.074e-05	0.00103689	0.000307737	0.00121467	0	0.000151966	0.00114474	0.000285719	0.000906011	0.00065797	0.000470983	0	0	0	0.000875748	0.00116962	0.000927099	0.000366452	0.00209784	0.00115778	0.00291045
72	Alpha-1-antichymotrypsin OS=Homo sapiens GN=SERPINA3 PE=1 SV=2	AACT_HUMAN	48	5.19	Homo Sapiens	0.0012921	0.00119357	0.00260194	0.00273217	0.0024516	0.00514336	0.00302202	0.00315057	0.00337887	0.00274888	0.00409243	0.00578484	0.00444398	0.00652962	0.00760981	0.00290365	0.00331429	0.0036884	0.00249696	0.00217958	0.00170711	0.00169953	0.00113661	0.00537759	0.00612193	0.00308774	0.00334104	0.00288304	0.00279335	0.00561243
73	Vitamin K-dependent protein S OS=Homo sapiens GN=PROS1 PE=1 SV=1	PROS_HUMAN	75	5.37	Homo Sapiens	0.00183383	0.00283006	0.00199377	0.00262862	0.00239748	0.00122326	0.00113992	0.00144862	0.00173984	0.0025012	0.00163437	0.00145779	0.00290641	0.00247853	0.0022333	0.000965589	0.000696161	0.00244226	0.0016613	0.00186687	0.00113784	0.00150642	0.00153252	0.0020184	0.00205347	0.00165647	0.00126522	0.00203267	0.00199875	0.00295878
74	Band 3 anion transport protein OS=Homo sapiens GN=SLC4A1 PE=1 SV=3	B3AT_HUMAN	102	4.84	Homo Sapiens	0.00073461	0.0012603	0.00079731	0.00152647	0.00161372	0.000692057	0.00221955	0.00222313	0.00146994	0.00195774	0.00268894	0.00192029	0.0020918	0.00173371	0.00160819	0.00232881	0.00132925	0.00322776	0.00176068	0.00164879	0	0	0.00039904	0.00178937	0.00151013	0.00164329	0.00108578	0.00217356	0.00186061	0.00358015
75	Serum amyloid A-4 protein OS=Homo sapiens GN=SAA4 PE=1 SV=2	SAA4_HUMAN	15	9.38	Homo Sapiens	0.00666927	0.00264382	0.00501826	0.00430997	0.00453253	0.0320187	0.0312931	0.0267753	0.0247784	0.0221086	0.00408055	0.0045181	0.0107513	0.0112544	0.00810586	0.0186009	0.0173987	0.0206058	0.00232419	0.00302157	0.0135816	0.0129731	0.01172	0.00461967	0.00487674	0.00862965	0.00849577	0.00648412	0.00734586	0.0107551
76	Complement component C8 beta chain OS=Homo sapiens GN=C8B PE=1 SV=3	CO8B_HUMAN	67	8.17	Homo Sapiens	0.00139528	0.00244449	0.000834137	0.00401374	0.00362862	0.00115447	0.000936068	0.0011992	0.00218052	0.0010733	0.00499831	0.00442626	0.00454893	0.00270605	0.00190371	0.000697056	0.000495914	0.00106055	0.00267937	0.00310235	0.00168137	0.00215382	0.00201639	0.00149209	0.00170015	0.00150575	0.000733262	0.00110023	0.00174399	0.00381904
77	Hemoglobin subunit alpha OS=Homo sapiens GN=HBA1 PE=1 SV=2	HBA_HUMAN	15	9.09	Homo Sapiens	0.013308	0.0109213	0.00917241	0.00738904	0.0070363	0.00494461	0.00817858	0.00788153	0.00605741	0.00879643	0.0160806	0.0157903	0.0244074	0.00354578	0.00469287	0.011008	0.00870728	0.0118321	0.00496741	0.00480523	0	0.00208328	0.00357961	0	0.00181047	0.0131033	0.00574525	0.014759	0.00351492	0.00986944
78	Vinculin OS=Homo sapiens GN=VCL PE=1 SV=4	VINC_HUMAN	124	5.33	Homo Sapiens	0.00181445	0.00317322	0.00126332	0.0024409	0.00271836	0	0.000323206	7.67978e-05	0.000415618	0.000162706	0.0017472	0.00124972	0.00123069	0.000423371	0.000373499	0.000291103	0.000805136	7.94774e-05	0.000161994	0.000149356	0.0010662	0.00177645	0.000920741	0.00152065	0.00145115	0.00139229	0.00079511	0.00134795	0.000775525	0
79	Alpha-1-acid glycoprotein 1 OS=Homo sapiens GN=ORM1 PE=1 SV=1	A1AG1_HUMAN	24	4.66	Homo Sapiens	0.00390074	0.00368485	0.00571611	0.00379361	0.00374767	0.00775653	0.00647049	0.00570817	0.00329176	0.00433567	0.00665073	0.00550016	0.00689109	0.00534746	0.00593992	0.00451405	0.00308788	0.00656923	0.00436133	0.00398922	0.00501664	0.00523217	0.0042398	0.00472793	0.0058258	0.00657046	0.00803759	0.00598503	0.00485556	0.00469697
80	Spectrin beta chain, erythrocytic OS=Homo sapiens GN=SPTB PE=1 SV=5	SPTB1_HUMAN	246	4.92	Homo Sapiens	0.00022865	0.000107989	0	0.00027678	0.000254639	0	0.000182064	0	0.00027257	0.000114315	0.00107887	0.00018433	0.00125922	0	4.715e-05	0.000692547	9.36739e-05	0.000495367	4.09493e-05	7.4317e-05	0	0	0	7.54724e-05	0.000163103	0.000796188	0.00023381	0.00220265	0.000903	0.00233656
81	Multimerin-1 OS=Homo sapiens GN=MMRN1 PE=1 SV=3	MMRN1_HUMAN	138	8.01	Homo Sapiens	0.00135864	0.00115501	0.000948496	0.00124492	0.00136573	0	0.000182119	0.000136439	0.000255903	0.000116939	0.00186418	0.00217523	0.00189378	0.000382331	0.000432651	0	0	0.000406991	0.00064995	0.000751724	0.000132076	0.000229229	0	0.00150996	0.00101122	0.00121373	0.00160807	0.00107208	0.00128867	0
82	Erythrocyte band 7 integral membrane protein OS=Homo sapiens GN=STOM PE=1 SV=3	STOM_HUMAN	32	8.07	Homo Sapiens	0.00565221	0.00414962	0.0044979	0.00324098	0.0036774	0.0031616	0.00526211	0.00649949	0.00444424	0.00536172	0.00459824	0.00412647	0.00394586	0.0026327	0.00222827	0.00419857	0.00307188	0.00601504	0.00327006	0.00380492	0.00155007	0.00196387	0.00213488	0.00353905	0.00353983	0.00419439	0.00513212	0.00491834	0.00618044	0.00397996
83	Alpha-actinin-1 OS=Homo sapiens GN=ACTN1 PE=1 SV=2	ACTN1_HUMAN	103	5.07	Homo Sapiens	0.00188271	0.00214485	0.000545965	0.00252106	0.00259059	0	0.000560635	0.000459114	0.000305588	7.60234e-05	0.00174948	0.000751857	0.000507647	0	0	0.00060259	0	0.000535779	0.00106328	0.00100948	0.000795547	0.000792015	0.000719816	0	0	0.00158295	0.00227667	0.00179348	0.00137516	0.000352956
84	Keratin, type II cytoskeletal 5 OS=Homo sapiens GN=KRT5 PE=1 SV=3	K2C5_HUMAN	62	7.91	Homo Sapiens	0.00453504	0.00442938	0.00373081	0.00655552	0.0064037	0.00416348	0.00320345	0.00380924	0.00293523	0.00334733	0.00773545	0.00556566	0.00344435	0.00313544	0.00263672	0.00299641	0.00188427	0.00261361	0.0025757	0.00221843	0.00338922	0.00150833	0.00550783	0.00659903	0.0071289	0.0043943	0.00152779	0.00201284	0.0037598	0.00175985
85	Complement C1s subcomponent OS=Homo sapiens GN=C1S PE=1 SV=1	C1S_HUMAN	77	4.59	Homo Sapiens	0.000887989	0.000687035	0.000734485	0.00118233	0.0012684	0.00175756	0.000909647	0.000983752	0.00118172	0.000674985	0.00297822	0.00302043	0.00334253	0.00137253	0.00101987	0.000469276	0.000416616	0.00104941	0.00187468	0.0011961	0.00120015	0.00195836	0.00165024	0.000816072	0.00086964	0.00173405	0.00112156	0.00161714	0.00166094	0.00184311
86	Platelet factor 4 OS=Homo sapiens GN=PF4 PE=1 SV=2	PLF4_HUMAN	11	8.78	Homo Sapiens	0.0158885	0.0116587	0.010222	0.00499027	0.00611321	0.0119775	0.0209843	0.0236249	0.0226361	0.01343	0.0111439	0.0132498	0.0257513	0.00604394	0.00519128	0.0173684	0.0165367	0.0304082	0	0	0.00116513	0	0.00132057	0.00629955	0.00726839	0.00868026	0.00859	0.00840032	0.00656649	0.0013237
87	Complement component C7 OS=Homo sapiens GN=C7 PE=1 SV=2	CO7_HUMAN	94	6.44	Homo Sapiens	0.00119397	0.00230513	0.00112896	0.00204648	0.00230005	0.000741233	0.000612841	0.000352266	0.000504089	0.00046454	0.00365532	0.00334222	0.00240833	0.000943752	0.000945914	0.00082653	0.000646679	0.00107395	0.00164389	0.00154829	0.000897137	0.00120068	0.00149306	0.00119069	0.00300668	0.000659098	0.000128492	0.000782095	0.000428789	0.00131641
88	Properdin OS=Homo sapiens GN=CFP PE=1 SV=2	PROP_HUMAN	51	7.92	Homo Sapiens	0.00673301	0.0071255	0.0063858	0.00406739	0.00452299	0.000634749	0	0.000369188	0.000385424	0.00124713	0.00297035	0.00400436	0.00144956	0	0	0.000402287	0.000456328	0	0.00292916	0.00292978	0.00282406	0.00135115	0.00330277	0.00271745	0.00234865	0.000371749	0.000325417	0	0.000709691	0.000712833
89	Apolipoprotein C-II OS=Homo sapiens GN=APOC2 PE=1 SV=1	APOC2_HUMAN	11	4.36	Homo Sapiens	0.0176346	0.0116899	0.0153366	0.00618949	0.00746761	0.0105892	0.0072854	0.00514514	0.00717374	0.00399072	0.0107672	0.012861	0.0142555	0.00441445	0.00585748	0.00985653	0.00928459	0.00966499	0	0	0.0246818	0.0205698	0.0166421	0.00113395	0.00123225	0.0113685	0.0119205	0.0117436	0.0101916	0.00816138
90	Glyceraldehyde-3-phosphate dehydrogenase OS=Homo sapiens GN=GAPDH PE=1 SV=3	G3P_HUMAN	36	8.73	Homo Sapiens	0.00520999	0.00479227	0.00260271	0.00469152	0.00478675	0	0.000701968	0.000919805	0.000543799	0.00165822	0.00498464	0.00530362	0.00448118	0.00294301	0.00298584	0.000283647	0.000250954	0.00056565	0.00788154	0.00563841	0.00543428	0.00402026	0.00352967	0.00245685	0.00389402	0.00371765	0.00308321	0.00426326	0.00313914	0.0020906
91	Protein AMBP OS=Homo sapiens GN=AMBP PE=1 SV=1	AMBP_HUMAN	39	6.15	Homo Sapiens	0.00159859	0.0017029	0.00320105	0.00373515	0.00271532	0.00506182	0.0037261	0.00339074	0.00385219	0.00501374	0.00178719	0.00175146	0.00436134	0.00340789	0.00410558	0.00238393	0.00191786	0.00402305	0.00114394	0.00252503	0.0027069	0.00418543	0.00368718	0.0020922	0.00326834	0.00430743	0.00284803	0.00379751	0.00359471	0.00363593
92	CD5 antigen-like OS=Homo sapiens GN=CD5L PE=1 SV=1	CD5L_HUMAN	38	5.15	Homo Sapiens	0.00460107	0.00477407	0.00443886	0.00281964	0.0033	0.00482769	0.0031765	0.00472419	0.00405219	0.00609197	0.00301721	0.00227944	0.00217996	0.000684393	0.0014801	0.00285444	0.00184345	0.00507389	0.00432888	0.00339216	0.0010473	0	0.00359559	0.00646248	0.00508429	0.00479592	0.00475205	0.00401912	0.00337385	0.0022014
93	Apolipoprotein C-I OS=Homo sapiens GN=APOC1 PE=1 SV=1	APOC1_HUMAN	9	9.17	Homo Sapiens	0.0132136	0.0103436	0.0104523	0.00832705	0.00873274	0.012041	0.0178377	0.014176	0.0136234	0.0146342	0.00999079	0.00862306	0.0140405	0.00886444	0.00960189	0.0126392	0.00883822	0.010645	0.00388161	0.000973283	0.0144292	0.0153473	0.0136419	0.0202443	0.0118683	0.0101495	0.00957542	0.0122862	0.00758174	0.00242153
94	Keratin, type I cytoskeletal 14 OS=Homo sapiens GN=KRT14 PE=1 SV=4	K1C14_HUMAN	52	4.81	Homo Sapiens	0.00721126	0.00740468	0.00492362	0.0106423	0.0101075	0.00706575	0.00532713	0.00663521	0.00562932	0.00637761	0.0135528	0.0127775	0.00603132	0.00648472	0.00411176	0.00317375	0.00232912	0.000663331	0.00220354	0.00272423	0.0045405	0.00361969	0.00715845	0.00618176	0.00307372	0.00507672	0	0.00248654	0.0040964	0.00286695
95	Fibulin-1 OS=Homo sapiens GN=FBLN1 PE=1 SV=4	FBLN1_HUMAN	77	4.86	Homo Sapiens	0.000321812	0.000401513	0	0.00239913	0.00219034	0.000484464	0.0013042	0.00141094	0.00184984	0.00139922	0.000691813	0.00136057	0.00147259	0.00148854	0.00116	0.0019472	0.00313989	0.000332695	0.00194576	0.00113768	0.00298741	0.00343063	0.00211315	0.000161992	0.0012341	0.000930224	0.000585746	0.000539229	0.00112018	0.00233121
96	Serum amyloid A-1 protein OS=Homo sapiens GN=SAA1 PE=1 SV=1	SAA1_HUMAN	14	6.79	Homo Sapiens	0.000871017	0	0	0.00369477	0.00335716	0.0129446	0.00575049	0.00844069	0.00423247	0.00711887	0.0151789	0	0.0233283	0.115861	0.120752	0	0	0	0.00105113	0.00450403	0	0	0	0.0103324	0.00952231	0	0.0175635	0.00362034	0	0.00571352
97	Alpha-1B-glycoprotein OS=Homo sapiens GN=A1BG PE=1 SV=4	A1BG_HUMAN	54	5.71	Homo Sapiens	0.000225819	0.000734396	0.00150009	0.0012071	0.0014417	0.00315641	0.00297039	0.00244883	0.00197311	0.00192282	0.00158105	0.00210849	0.00209801	0.00142319	0.00158153	0.0029641	0.00353166	0.00348531	0.00285239	0.00262554	0.000986815	0.00139838	0.00125446	0.00174202	0.00136054	0.00230533	0.00266727	0.00205059	0.00165751	0.0050094
98	Ankyrin-1 OS=Homo sapiens GN=ANK1 PE=1 SV=3	ANK1_HUMAN	206	5.92	Homo Sapiens	0.000211629	0.000256252	0	0.000221596	0.000380011	0	0.000375655	0.00018334	9.67477e-05	0.0001538	0.000714337	0.000220929	0.000973703	8.41649e-05	0.000156389	0.000752622	0.000159063	0.000836567	0.000313588	0.000240582	0	0	0	0.000214211	0.000389431	0.000812442	0.00019984	0.00194857	0.000761357	0.00108342
99	Ficolin-3 OS=Homo sapiens GN=FCN3 PE=1 SV=2	FCN3_HUMAN	33	6.66	Homo Sapiens	0	0	0	0.000623226	0	0	0	0	0.000953806	0.000600653	0	0	0	0	0	0	0	0	0.00558767	0.00453144	0	0	0	0	0	0.0143457	0.0135513	0.0236825	0.00296273	0.0133101
100	Haptoglobin-related protein OS=Homo sapiens GN=HPR PE=2 SV=2	HPTR_HUMAN	39	7.11	Homo Sapiens	0.00624303	0.00487578	0.00688407	0.00533856	0.00564573	0.0101929	0.0137541	0.0111529	0.0105385	0.0109677	0.00754608	0.00980179	0.0102777	0.0113411	0.0100915	0.0124448	0.0131346	0.019753	0.0217184	0.0223699	0.0099358	0.00918397	0.00838849	0.0114729	0.00718713	0.0141296	0.0126465	0.00985085	0.010767	0.0136497
101	Complement component C8 alpha chain OS=Homo sapiens GN=C8A PE=1 SV=2	CO8A_HUMAN	65	6.41	Homo Sapiens	0.00202517	0.00265652	0.000865144	0.0027973	0.00297158	0.000234957	0.000616335	0.000654233	0.000242734	0.000611562	0.00351915	0.00244995	0.00254969	0.00121431	0.00104294	0.000635907	0.00029209	0.000544081	0.000461988	0.000366248	0.000768228	0.00115878	0.000705471	0.00213216	0.00184279	0.000588179	0.000505474	0.000709272	0.000745459	0.000895315
102	Tropomyosin alpha-4 chain OS=Homo sapiens GN=TPM4 PE=1 SV=3	TPM4_HUMAN	29	4.36	Homo Sapiens	0.00884787	0.00532782	0.00387733	0.00515937	0.00556425	0	0	0	0	0	0.00324397	0.00298685	0.00300847	0	0	0	0	0	0.0027385	0.00358621	0.00151239	0.0025999	0.00187797	0.000430118	0.000467405	0.00396788	0.00566928	0.00430331	0.00408457	0
103	Complement factor H-related protein 5 OS=Homo sapiens GN=CFHR5 PE=1 SV=1	FHR5_HUMAN	64	7.08	Homo Sapiens	0.00195238	0.00374228	0.00166317	0.00229245	0.00232076	0	0	0	0.000246527	0.000252373	0.00428251	0.00554865	0.00422105	0	0.000214763	0	0	0.000157411	0.000313862	0.000684339	0	0	0	0.00138198	0.00219038	0	0	0	0.000637148	0
104	Desmoplakin OS=Homo sapiens GN=DSP PE=1 SV=3	DESP_HUMAN	332	6.78	Homo Sapiens	0.000186407	0.000266375	0.000395379	0.000737708	0.000456061	0	0.000181347	0.000298886	7.06496e-05	0.000132223	0.000604185	0.000479408	6.54961e-05	0.00010524	8.29551e-05	0	0	0	0.000315277	0.000196033	0	0	0.00026707	0.00024577	0.000383931	0.000143311	0	0	4.27105e-05	0
105	Antithrombin-III OS=Homo sapiens GN=SERPINC1 PE=1 SV=1	ANT3_HUMAN	53	6.68	Homo Sapiens	0.00023008	0.00099959	0.000588098	0.00141409	0.00169484	0.00188338	0.000281685	0.000179678	0.000444067	0.000604466	0.00146489	0.00102948	0.00156299	0.00242951	0.00208192	0.00185888	0.000972136	0.00153487	0.000375171	0.000913502	0.00276177	0.00214331	0.0008652	0.00165957	0.00126344	0.00253609	0.00108352	0.00225777	0.00165553	0.00373071
106	Complement C1q subcomponent subunit B OS=Homo sapiens GN=C1QB PE=1 SV=3	C1QB_HUMAN	27	8.87	Homo Sapiens	0.00484396	0.00458448	0.00185959	0.00288326	0.00218138	0.00363068	0.00112007	0.00105006	0.00146807	0.00206996	0.00302934	0.00286364	0.00258201	0.00328186	0.00303865	0.000759876	0.00068617	0.00262371	0.00350143	0.00433671	0.00515893	0.00442759	0.0055452	0.00349222	0.00396525	0.00373872	0.00851437	0.00412898	0.00315691	0
107	Tubulin beta-1 chain OS=Homo sapiens GN=TUBB1 PE=1 SV=1	TBB1_HUMAN	50	4.82	Homo Sapiens	0.00350072	0.0034413	0.00149316	0.00349917	0.00346131	0	0.000646725	0.000188243	0	0.00031784	0.00138274	0.000999907	0	0	0	0.000523722	0.000284807	0.00049276	0.000201471	0.00168813	0.00146374	0.000502126	0.00134907	0.00151063	0.00174048	0.00373656	0.0041079	0.00487883	0.00294253	0.000291213
108	Complement C1q subcomponent subunit C OS=Homo sapiens GN=C1QC PE=1 SV=3	C1QC_HUMAN	26	8.58	Homo Sapiens	0.00408216	0.00425726	0.00359242	0.00187777	0.00181222	0.00572511	0.00251279	0.00290506	0.00303197	0.00245936	0.00282582	0.00226475	0.00217311	0.00255705	0.00234699	0.00218431	0.00109531	0.0035246	0.00401963	0.00109874	0.00359301	0.0048297	0.00467058	0.00242717	0.00492605	0.00460199	0.00790976	0.0060381	0.00341388	0.00592664
109	14-3-3 protein zeta/delta OS=Homo sapiens GN=YWHAZ PE=1 SV=1	1433Z_HUMAN	28	4.43	Homo Sapiens	0.00667283	0.00727518	0.00469859	0.00419366	0.00502877	0	0.00125324	0.00135053	0.00155417	0.00142408	0.00541046	0.00374312	0.00372949	0.000949762	0.000888855	0.000368049	0	0.000527957	0.000357631	0.00603926	0.000987375	0.0013601	0.000934851	0.00316053	0.00141026	0.00204469	0.0038208	0.00248319	0.00303294	0
110	Ig kappa chain V-I region WEA OS=Homo sapiens PE=1 SV=1	KV118_HUMAN	12	9.15	Homo Sapiens	0	0	0	0	0	0.00618076	0	0	0.00460704	0.00599139	0	0	0	0	0	0	0	0	0.0116045	0.00505068	0.0851365	0.0738423	0.0596748	0.108565	0.0996678	0	0	0.00152735	0	0
111	Fermitin family homolog 3 OS=Homo sapiens GN=FERMT3 PE=1 SV=1	URP2_HUMAN	76	6.98	Homo Sapiens	0.00213487	0.00140067	0.00122864	0.0021771	0.00241674	0	0.000330899	0.000374504	0.000416551	0.000579125	0.00176707	0.00125829	0.000515996	0	0	0.00033936	0.000118873	0.000194511	0.00209486	0.00210261	0.00148664	0.00198413	0.00106985	0.00148432	0.00157994	0.000939136	0.000647449	0.00121323	0.00116997	0
112	Inter-alpha-trypsin inhibitor heavy chain H3 OS=Homo sapiens GN=ITIH3 PE=1 SV=2	ITIH3_HUMAN	100	5.49	Homo Sapiens	0.000121942	0	0	0.00113737	0.000783998	0.000476444	0.000403226	0.000472333	0.000197877	0.000637338	0.000530735	0.000455513	0.00174297	0.00190151	0.00199309	0	0	0.000413819	0.00109882	0.000460622	0.000148301	0.000374673	0.000814042	0.000879572	0.000730799	0.00062461	0.000987751	0.000607977	0.000660021	0.000909334
113	Myosin light polypeptide 6 OS=Homo sapiens GN=MYL6 PE=1 SV=2	MYL6_HUMAN	17	4.29	Homo Sapiens	0.0128607	0.00987892	0.00882261	0.00898773	0.0101412	0	0.00295769	0.00222478	0.00325974	0.00233917	0.00384478	0.00267225	0.00230681	0.000544433	0.000862145	0.00212334	0.00111681	0.00238938	0.00502444	0.00392054	0.00505901	0.00444192	0.0040186	0.00742992	0.00435773	0.00731571	0.00650478	0.00896308	0.00927889	0.00277949
114	Immunoglobulin lambda-like polypeptide 5 OS=Homo sapiens GN=IGLL5 PE=2 SV=2	IGLL5_HUMAN	23	9.05	Homo Sapiens	0.00136797	0.0094541	0.00621608	0.00163936	0.0051028	0.0028165	0.00907436	0.00944958	0.00479595	0.00522078	0	0.00293574	0.00244971	0	0.00298801	0.0139298	0.0127918	0.0141476	0.0154053	0.0169185	0	0	0.0208951	0.0114631	0.00815973	0.00770506	0.0126816	0.0110012	0.00476702	0.00922787
115	Filaggrin-2 OS=Homo sapiens GN=FLG2 PE=1 SV=1	FILA2_HUMAN	248	8.35	Homo Sapiens	0.000454151	0.000390922	0.000574774	0.000701331	0.00042622	0.000257531	8.24115e-05	0.00020988	9.63712e-05	0.00012918	0.000856895	0.000606446	0.000473211	0.000160847	5.50079e-05	0	0	4.06221e-05	0	0	5.97988e-05	0	0.000264642	0	0.000109504	0.000212904	3.38259e-05	7.32744e-05	0.0003497	0
116	Integrin-linked protein kinase OS=Homo sapiens GN=ILK PE=1 SV=2	ILK_HUMAN	51	8.18	Homo Sapiens	0.00232535	0.00199597	0.00110263	0.00180026	0.00232044	0	0.00122733	0.000461464	0.000228171	0.000158352	0.00135197	0.00106985	0.000770837	0	0	0.000710359	0.000540436	0.000596817	0.00322169	0.0027856	0.00168634	0.00209938	0.00184338	0	0	0.00141556	0.00193321	0.00190474	0.00197773	0
117	Tubulin alpha-1B chain OS=Homo sapiens GN=TUBA1B PE=1 SV=1	TBA1B_HUMAN	50	4.7	Homo Sapiens	0.00163372	0.00229622	0	0.00273391	0.00313754	0	0.000502966	0.000470693	0.00119295	0.00112009	0.00122779	0.000819684	0.000522876	0	0	0.000515827	0.000370558	0.000709454	0.00309337	0.00176539	0.00184157	0.000874516	0.000653437	0	0	0.00305951	0.00385831	0.00248247	0.00306548	0
118	Apolipoprotein M OS=Homo sapiens GN=APOM PE=1 SV=2	APOM_HUMAN	21	5.92	Homo Sapiens	0	0	0	0.00109276	0.00205982	0.00528922	0.00382199	0.0033699	0.000369419	0.00132777	0.00155622	0.00173019	0.00124494	0.00525784	0.00546264	0.00516518	0.00486326	0.0046192	0	0.00528205	0.00501126	0.00569447	0.00612848	0	0	0.000466328	0.0019517	0.00197717	0.00128704	0
119	Tubulin beta chain OS=Homo sapiens GN=TUBB PE=1 SV=2	TBB5_HUMAN	50	4.52	Homo Sapiens	0.00212272	0.00212064	0	0.00323562	0.00296822	0	0.00165511	0.00094471	0.000397004	0	0.00147707	0.000830394	0	0	0	0.000934246	0.000474679	0.00142333	0.000698091	0.00063557	0.00171341	0.00200854	0	0.00139857	0.00147527	0.00305204	0.00418868	0.00351754	0.0044929	0.00043682
120	Apolipoprotein C-IV OS=Homo sapiens GN=APOC4 PE=1 SV=1	APOC4_HUMAN	15	9.13	Homo Sapiens	0.000839019	0.00116545	0.000846204	0.00369416	0.00339078	0.00731476	0.00398114	0.00156898	0.000517187	0.00158149	0.00327378	0.00485007	0.0031985	0.00618753	0.00546613	0.00482167	0.0059358	0.00605861	0	0.00236763	0.0101183	0.00418699	0.00809567	0.0104803	0.00483593	0.0019168	0.0032925	0.0012483	0.00777936	0.00210531
121	HLA class I histocompatibility antigen, A-2 alpha chain OS=Homo sapiens GN=HLA-A PE=1 SV=1	1A02_HUMAN	41	7	Homo Sapiens	0.00290368	0.00291569	0.00227093	0.00261962	0.00294337	0	0.00152967	0.000803633	0.000582928	0.00107367	0.00199039	0.00111101	0.00137915	0.000669351	0.00050286	0.00050453	0	0.00086524	0.000239281	0.000433103	0.000913441	0.00137171	0.000796875	0.00153379	0.000632501	0.00280803	0.00130245	0.0028222	0.00283178	0
122	Cholesteryl ester transfer protein OS=Homo sapiens GN=CETP PE=1 SV=2	CETP_HUMAN	55	6.02	Homo Sapiens	0.00205015	0.000556586	0.00147281	0.00248036	0.00219488	0	0	0	0.000141051	0.000726958	0.000741828	0.00207166	0.00182028	0.00138	0.000974377	0.000376104	0.000928483	0	0	0.00113217	0.00112805	0.00148323	0.00134802	0.00102911	0.00133537	0.000263784	0.00067223	0.000330401	0.000547673	0.00385893
123	Immunoglobulin J chain OS=Homo sapiens GN=IGJ PE=1 SV=4	IGJ_HUMAN	18	4.87	Homo Sapiens	0.00486569	0.00369806	0.00518905	0.00236014	0.00263502	0.00564499	0.00613822	0.00682028	0.00769265	0.00487112	0.00272842	0.00253063	0.00193381	0.00126754	0.00157785	0.00431163	0.00337706	0.00420932	0.0047121	0.00208694	0	0	0.00226123	0.00524526	0.00629434	0.00267537	0.00502146	0.00410195	0.00380832	0.00282862
124	Proteoglycan 4 OS=Homo sapiens GN=PRG4 PE=1 SV=2	PRG4_HUMAN	151	10.16	Homo Sapiens	0.000704183	0.000175928	0.000618562	0.000470197	0.00026452	0	9.88695e-05	0	0.000105695	0.000158681	0.00102824	0.00078564	0.00198886	0	0	0	0	0	0.000394927	0.00047734	0	0	0	0.0013717	0.000972787	6.40535e-05	5.55552e-05	0.000187318	0.000299361	0.00158997
125	Latent-transforming growth factor beta-binding protein 1 OS=Homo sapiens GN=LTBP1 PE=1 SV=4	LTBP1_HUMAN	187	5.85	Homo Sapiens	0.000233847	0.000521497	0.000302435	0.000571538	0.000754859	0	0	0	4.24603e-05	6.28108e-05	0.000349499	0.000732762	0.00116503	0	0	0	0	5.27016e-05	0.000133872	4.81159e-05	0	0	0	0.000269583	0.000104007	0.00063882	0.000768013	0.00066524	0.000569333	0
126	Lactotransferrin OS=Homo sapiens GN=LTF PE=1 SV=6	TRFL_HUMAN	78	8.17	Homo Sapiens	0	0	0	0	0	0	0.00187486	0.00230377	0.000609829	0.000203928	0.00203425	0.000761781	0.00128431	0.00351247	0.0033356	0	0	0.0022206	0.00229193	0.00177682	0	0	0	0	0.00043536	0	0	0	0	0
127	Pyruvate kinase PKM OS=Homo sapiens GN=PKM PE=1 SV=4	KPYM_HUMAN	58	7.94	Homo Sapiens	0.00183561	0.00175706	0.0010739	0.00229302	0.00216207	0	0	0	0	0	0.0016935	0.00164736	0.00105411	0	0.000119377	0.000711197	0.000560989	0	0.000432656	0.000151027	0.00158756	0.000978923	0.00151552	0.000334008	0.000558891	0.000820525	0.00141643	0.00151344	0.00118931	0
128	Transthyretin OS=Homo sapiens GN=TTR PE=1 SV=1	TTHY_HUMAN	16	5.58	Homo Sapiens	0.00391296	0.00524581	0.0046862	0.00427162	0.00439041	0.00584595	0.00346288	0.00177197	0.00197542	0.00499151	0.00306947	0.00454694	0.00599163	0.00195131	0.00329887	0.0054835	0.00670833	0.00377746	0	0.00469816	0.00794626	0.00982536	0.00376189	0.00473453	0.00667445	0.00390829	0	0.0028938	0.0005729	0.00591381
129	Alpha-2-antiplasmin OS=Homo sapiens GN=SERPINF2 PE=1 SV=3	A2AP_HUMAN	55	6.24	Homo Sapiens	0	0	0.000231735	0.00129559	0.00120132	0.000261735	0.000678316	0.000427903	0.000575598	0.000360392	0.00126024	0.000998032	0.00221836	0.00192633	0.00194701	0.00065323	0.000246391	0.000469756	0.0002731	0.0016078	0.00122625	0.00114051	0.00023622	0	0	0.000609389	0.000745431	0.000669427	0.00120861	0.000794219
130	EGF-containing fibulin-like extracellular matrix protein 1 OS=Homo sapiens GN=EFEMP1 PE=1 SV=2	FBLN3_HUMAN	55	4.7	Homo Sapiens	0.000450537	0.00104789	0.000449893	0.00165526	0.00163534	0	0	0.000513468	0.000362364	0	0.000446469	0.000825968	0.0013459	0.00136748	0.0013741	0.00112695	0.00170096	0	0.00026756	0.0018039	0.000834054	0.00125499	0.00124211	0	0.000740645	0.00182398	0.00127126	0.000834628	0.00211668	0.00337457
131	N-acetylmuramoyl-L-alanine amidase OS=Homo sapiens GN=PGLYRP2 PE=1 SV=1	PGRP2_HUMAN	62	7.59	Homo Sapiens	0.00070631	0.000856942	0.000512662	0.00161326	0.00145261	0.000754317	0.000565978	0	0.000317224	0.000386464	0.000725138	0.000953059	0.00190151	0.000785812	0.000520445	0.000499856	0.000448224	0.000331976	0.000562977	0.00145049	0.00174594	0.00171947	0.00183994	0	0	0.000617614	0.000267681	0.00112144	0.000364545	0.00138813
132	Ras-related protein Rap-1b OS=Homo sapiens GN=RAP1B PE=1 SV=1	RAP1B_HUMAN	21	5.39	Homo Sapiens	0.00328414	0.00548352	0.00296476	0.00417199	0.00448181	0	0.00118436	0	0	0	0.00350821	0.00238073	0.00186742	0.000600379	0.00102274	0.000989515	0	0	0.00215291	0.00303335	0.00848009	0.00928301	0.00619698	0.00268476	0.00286595	0.00227484	0.00391635	0.003719	0.00206668	0
133	Afamin OS=Homo sapiens GN=AFM PE=1 SV=1	AFAM_HUMAN	69	5.7	Homo Sapiens	0	0	0	0.000566012	0.00118596	0.00226849	0.00141371	0.00130011	0	0.000347361	0	0.00092555	0.000881319	0	0	0.00194648	0.00182741	0.00175504	0.00101025	0.00117502	0.000400674	0.000819533	0	0.000187174	0.000187917	0.000831642	0	0.000537605	0.000205506	0.00174027
134	Ig heavy chain V-III region 23 OS=Homo sapiens GN=IGHV3-23 PE=1 SV=2	HV303_HUMAN	13	8.46	Homo Sapiens	0.0028845	0.00442167	0.00239159	0.00399937	0.0048095	0.00650361	0.00425015	0.00762884	0	0.000620122	0.00315283	0.00490307	0.00199957	0.00198025	0.00326916	0.00714167	0.00900429	0.00583671	0.00152494	0.00170285	0	0	0.003638	0.00239135	0.000997405	0.00444749	0.00789383	0.0063998	0.00381766	0.00718398
135	Alpha-1-acid glycoprotein 2 OS=Homo sapiens GN=ORM2 PE=1 SV=2	A1AG2_HUMAN	24	4.76	Homo Sapiens	0	0	0.0041696	0.0023196	0.00326666	0.00455346	0.00448446	0.00235357	0.000824487	0.00133005	0.00339984	0.00417487	0.00435545	0.00385376	0.00388277	0.00430328	0.00428406	0.00423808	0.000826008	0	0.00101258	0.00208419	0	0	0	0.00400205	0.00342681	0.00462208	0.00169251	0.000908074
136	Plasma kallikrein OS=Homo sapiens GN=KLKB1 PE=1 SV=1	KLKB1_HUMAN	71	8.26	Homo Sapiens	0.000706348	0.00068703	0.000792033	0.00128588	0.00143272	0.000861452	0.000951623	0.00093201	0	0	0.000806077	0.000962071	0.00128741	0	0	0.00109071	0.0010567	0.00164845	0.00105417	0.00102392	0.00104967	0.00132578	0.00143317	0	0	0.000404959	0	0.000328853	0.000193656	0.000870592
137	Protein S100-A9 OS=Homo sapiens GN=S100A9 PE=1 SV=1	S10A9_HUMAN	13	6.07	Homo Sapiens	0.0033737	0.00271585	0.00239159	0.00377566	0.00423352	0.00307756	0.00657646	0.00727519	0.000610775	0	0.00530352	0.00420351	0.00367566	0.00506112	0.00439658	0.00238393	0.00142522	0.00312457	0	0	0	0	0.000999391	0.00338481	0.00104633	0.00182489	0.00125074	0	0.0017386	0
138	Ig kappa chain V-III region HAH OS=Homo sapiens PE=2 SV=1	KV312_HUMAN	14	8.18	Homo Sapiens	0.00492621	0.00410857	0.00313115	0.00233731	0.00279159	0.00774065	0.00360024	0.00506292	0.00538183	0.0048393	0.00377801	0.00422948	0.00342379	0.00120076	0.00155931	0.00554016	0.00561625	0.00580277	0	0.000642691	0.00105929	0	0.00389694	0.00718596	0	0.00480693	0.00704889	0.00790941	0.0038499	0.00156007
139	Histone H4 OS=Homo sapiens GN=HIST1H4A PE=1 SV=2	H4_HUMAN	11	11.91	Homo Sapiens	0	0.00483352	0	0.00443805	0.00431185	0.0114029	0.0102836	0.0107425	0.00322233	0.00651569	0.00370914	0.00371828	0.00515811	0.0172811	0.0152732	0.00421837	0.00293701	0.0105609	0	0.00844798	0	0	0	0.00569243	0.0109695	0	0	0	0	0
140	Profilin-1 OS=Homo sapiens GN=PFN1 PE=1 SV=2	PROF1_HUMAN	15	8.46	Homo Sapiens	0.00625422	0.00473032	0.00417206	0.00411656	0.00496922	0	0.00233937	0.00283515	0.00448763	0.0031784	0.00545282	0.0045538	0.00348288	0	0	0.000680752	0	0.00371525	0.00265598	0.000952244	0.00447409	0.00376475	0.00407021	0.00375547	0.00226387	0.00383764	0.00438165	0.00432702	0.00240248	0
141	Phospholipid transfer protein OS=Homo sapiens GN=PLTP PE=1 SV=1	PLTP_HUMAN	55	7.01	Homo Sapiens	0	0.00031785	0	0.00105575	0.000812079	0	0	0.000256695	0.000720483	0.000871692	0.000889552	0.00173872	0.000793143	0.004489	0.00357008	0.00018566	0.000410652	0	0.00153975	0.00124908	0	0.000456479	0	0.00148583	0.00134115	0.000175856	0.000152524	0	0.000491416	0.00165462
142	Coagulation factor XIII A chain OS=Homo sapiens GN=F13A1 PE=1 SV=4	F13A_HUMAN	83	5.95	Homo Sapiens	0.000450178	0.00122599	0.000217791	0.00140545	0.00160859	0	0	0	0.000519425	0.00101218	0.000887559	0.000605319	0.000420013	0	0	0.000250359	0	0.000121377	0.000420034	0.000334993	0.000378019	0.00030064	0	0	0.000483413	0.000575562	0.000742422	0	0.00071357	0
143	Cathelicidin antimicrobial peptide OS=Homo sapiens GN=CAMP PE=1 SV=1	CAMP_HUMAN	19	10.03	Homo Sapiens	0.00624525	0.00419249	0.00264395	0.00343032	0.00371983	0	0.000523279	0.00198779	0.00185656	0.00294761	0.00343981	0.00262048	0.00136812	0	0	0.00188845	0.00146263	0.00104892	0.00314713	0.00100236	0.00205958	0	0	0	0	0.00328106	0.00260752	0	0.00186578	0.00268223
144	Heat shock cognate 71 kDa protein OS=Homo sapiens GN=HSPA8 PE=1 SV=1	HSP7C_HUMAN	71	5.16	Homo Sapiens	0.00132501	0.00130847	0.00104663	0.00151632	0.00138165	0	0.000140032	0	0.000940707	0.00146395	0.0016681	0.000705894	0.000735819	0.000118385	0.000303948	0	0	0	0.000421095	0.000257493	0	0	0	0	0	0.000802793	0.00162021	0.00071776	0.000961065	0.00020508
145	Cofilin-1 OS=Homo sapiens GN=CFL1 PE=1 SV=3	COF1_HUMAN	19	8.29	Homo Sapiens	0.00361603	0.00419249	0.00327821	0.00325029	0.00250252	0	0.00223975	0.00199048	0.000830406	0.00168006	0.00689948	0.00575865	0.0055012	0	0	0.00134854	0.000713237	0.000518695	0.00105722	0.000501181	0.0030714	0.00133356	0.000693881	0	0	0.00175766	0.00173403	0.00195235	0.000482442	0
146	Plasma protease C1 inhibitor OS=Homo sapiens GN=SERPING1 PE=1 SV=2	IC1_HUMAN	55	6.52	Homo Sapiens	0	0	0	0.000959313	0.000777254	0	0	0	0.00115244	0.00137892	0.0013395	0.00182104	0.00127025	0.000961163	0.000920655	0	0	0	0.0023546	0.00214757	0	0	0	0.00101794	0.00158268	0.0019176	0.00208848	0.00125554	0.00123779	0.00313132
147	Complement component C8 gamma chain OS=Homo sapiens GN=C8G PE=1 SV=3	CO8G_HUMAN	22	8.48	Homo Sapiens	0.00341785	0.00361213	0.001401	0.00309491	0.00285267	0.000777272	0	0	0	0.00126742	0.00539186	0.00663248	0.00554554	0.00139982	0.00128863	0.00117875	0.00129449	0.00112987	0.00384938	0.00351546	0	0	0.000599261	0.00229931	0.00363419	0.00151798	0.00112038	0.00189085	0.00167189	0
148	Fructose-bisphosphate aldolase A OS=Homo sapiens GN=ALDOA PE=1 SV=2	ALDOA_HUMAN	39	8.2	Homo Sapiens	0.00399561	0.00192994	0.00175981	0.00132642	0.000999093	0	0.00064797	0.00109181	0	0	0.00188878	0.000818798	0.000896361	0	0	0	0	0.000527756	0.00255812	0.00245185	0.000328626	0.000316948	0	0	0.000696333	0.00172556	0.00146816	0.00190029	0.00105661	0
149	Angiotensinogen OS=Homo sapiens GN=AGT PE=1 SV=1	ANGT_HUMAN	53	6.27	Homo Sapiens	0	0	0	0.00104058	0.000830168	0.00246866	0.000897024	0.000266503	0	0	0.000769821	0.00111879	0.000739232	0.00265329	0.0030068	0.00116699	0.00131739	0.00143367	0.00141332	0.00180149	0.000509077	0.000711293	0	0	0	0	0	0.000180385	0.000763457	0.000412095
150	Myeloperoxidase OS=Homo sapiens GN=MPO PE=1 SV=1	PERM_HUMAN	84	9.14	Homo Sapiens	0	0	0	0	0	0	0.00233477	0.00202643	0.00183192	0.00185475	0.000924217	0	0.000882396	0.00146577	0.00178979	0.000121563	0	0.00126177	0.000355925	0.000378315	0	0	0	0	0	0	0	0	0	0
151	Complement factor H-related protein 1 OS=Homo sapiens GN=CFHR1 PE=1 SV=2	FHR1_HUMAN	38	7.42	Homo Sapiens	0.00460621	0.00396448	0.00378633	0.00377077	0.00391688	0.00143265	0.00237744	0.00273808	0.00301389	0.0014643	0.00506512	0.00407157	0.00469606	0.00128481	0.000949538	0.000537436	0.000356618	0.00200248	0.00196617	0.00179785	0.000639526	0.00198109	0.00248916	0	0	0.00227656	0.00183555	0.00290988	0.00295432	0
152	Sarcoplasmic/endoplasmic reticulum calcium ATPase 3 OS=Homo sapiens GN=ATP2A3 PE=1 SV=2	AT2A3_HUMAN	114	5.26	Homo Sapiens	0.00137726	0.00120498	0.000322765	0.00128014	0.00109349	0	0	0	0	0	0	0	0	0	0	0	0	0	0.000393654	0.000829584	0	0	0	0.000339868	0.000647047	0.000670102	0.000575056	0.000849012	0.000472795	0
153	Complement C4-A OS=Homo sapiens GN=C4A PE=1 SV=2	CO4A_HUMAN	193	7.08	Homo Sapiens	0.00768204	0.00825901	0.00707768	0.00640197	0.00645678	0.0049913	0.00405364	0.00550759	0.00534823	0.00589959	0.00671691	0.0073874	0.00993619	0.0063455	0.00613094	0.00211633	0.00175538	0.00551923	0.0066622	0.00539654	0.00126786	0.00282785	0	0.0022849	0.00155944	0.00307131	0.00363973	0.00295598	0.00476464	0
154	Coagulation factor XII OS=Homo sapiens GN=F12 PE=1 SV=3	FA12_HUMAN	68	7.76	Homo Sapiens	0.000366372	0.000191969	0	0.000667511	0.000513356	0.00126967	0.000700952	0.000276891	0.000523774	0.00128941	0.000244443	0.000271099	0.000450586	0	0	0.00129024	0.00109658	0.000972492	0.000144272	0	0.000947532	0.000651506	0.00130393	0.0013845	0.00147512	0.000634237	0.000786636	0.00101958	0.000605996	0.0013383
155	Ig alpha-2 chain C region OS=Homo sapiens GN=IGHA2 PE=1 SV=3	IGHA2_HUMAN	37	6.02	Homo Sapiens	0	0.00242209	0	0.00327339	0.00392155	0.00194533	0.00762487	0.0114981	0.0112108	0.0103682	0.00287427	0.00566409	0	0.005964	0.00674574	0.0182917	0.0291561	0.00875911	0.0134599	0.0127603	0	0	0	0	0.000367628	0.00866301	0.00888734	0.0097182	0.00450252	0
156	Integrin beta-1 OS=Homo sapiens GN=ITGB1 PE=1 SV=2	ITB1_HUMAN	88	5.04	Homo Sapiens	0.000714429	0.00115373	0.000639027	0.00103165	0.00119716	0	0.000398757	0.00021522	0.000226931	0.000542017	0.000603164	0	0.000445128	0	0	0.000355162	0	0	0.000394674	0.000364101	0.000138079	0	0	0	0.000606634	0.000599187	0.000840287	0.000898747	0.00119516	0
157	Monocyte differentiation antigen CD14 OS=Homo sapiens GN=CD14 PE=1 SV=2	CD14_HUMAN	40	6.16	Homo Sapiens	0.00109645	0.000654609	0.0015565	0.00137886	0.00167332	0	0	0	0	0	0.00184181	0.00125088	0.00467696	0.00111294	0.000965819	0	0	0	0	0	0.0013322	0.00156629	0.00185592	0	0	0.000486624	0.00123048	0.00115257	0	0.000546025
158	Pleckstrin OS=Homo sapiens GN=PLEK PE=1 SV=3	PLEK_HUMAN	40	8.45	Homo Sapiens	0.00171761	0.00265176	0.00124654	0.00146438	0.00157384	0	0.000628708	0.000826493	0.000297753	0.000794959	0.00174251	0.000675837	0.00109057	0	0	0	0	0	0.000619733	0.000463003	0.0018045	0.00172561	0	0.00142174	0.00150462	0.00168573	0.00153632	0.00184092	0.00214167	0
159	Desmoglein-1 OS=Homo sapiens GN=DSG1 PE=1 SV=2	DSG1_HUMAN	114	4.66	Homo Sapiens	0.00071537	0.000427551	0.000440428	0.00130106	0.000822855	0	0.000308887	0.000372579	0.000414153	0	0.00143659	0.000919712	0	7.83567e-05	6.07356e-05	0	0	0	0	0	0	0	0	0.00021799	0	0.000252211	0	0	0	0
160	Junction plakoglobin OS=Homo sapiens GN=JUP PE=1 SV=3	PLAK_HUMAN	82	6.05	Homo Sapiens	0.00014871	0.00027229	0.000380112	0.00208563	0.00123815	0	0	0.000518651	9.68301e-05	0.000143239	0.00204564	0.000945419	0	0.000430028	0.000387321	0	0	0	0.00030639	0.000445606	0	0	0.000160777	0.000308445	0	0.000587276	0	0	0	0
161	Protein Z-dependent protease inhibitor OS=Homo sapiens GN=SERPINA10 PE=1 SV=1	ZPI_HUMAN	51	8.58	Homo Sapiens	0	0	0.000486206	0.000248608	0.000220229	0	0	0	0	0	0.0016926	0.000174276	0.00264676	0.00138083	0.000910133	0	0	0	0	0.000171756	0.000489557	0.000370359	0.000539576	0	0	0.0001821	0.00064271	0	0.000440092	0.000904713
162	Complement factor I OS=Homo sapiens GN=CFI PE=1 SV=2	CFAI_HUMAN	66	7.53	Homo Sapiens	0	0.000468432	0	0.00054773	0.000715689	0	0.000841103	0.00107557	0.000659345	0.000237285	0.000744265	0.00179871	0.000990296	0.000941202	0.00107503	0.000626985	0.00140705	0.000688478	0.000904453	0.000962985	0	0	0	0	0	0.000723813	0.000746922	0.000559039	0.000423174	0.000991342
163	Platelet glycoprotein IX OS=Homo sapiens GN=GP9 PE=1 SV=3	GPIX_HUMAN	19	6.32	Homo Sapiens	0.00362632	0.00255528	0.00394627	0.00305593	0.00371983	0	0.00277031	0.00223525	0.00334351	0.00061819	0.00172983	0.00192317	0.00137599	0	0	0.00108872	0.000975153	0.00160198	0.000516343	0.00373836	0.00308892	0.00396826	0.00248916	0.00133623	0.000713408	0.00328424	0.00475648	0.00437881	0.00349033	0
164	Glutathione peroxidase 3 OS=Homo sapiens GN=GPX3 PE=1 SV=2	GPX3_HUMAN	26	8.29	Homo Sapiens	0	0.000502073	0.000488195	0.00249672	0.00242582	0.00143476	0	0	0.000305387	0.000451754	0.00156925	0.00228061	0.00385262	0.00102282	0.000559753	0.000795605	0.00106892	0.000956042	0.000754656	0.00170743	0.00334654	0.0033827	0.00184482	0	0	0.00256889	0	0.000904029	0.00175515	0.0026574
165	Sulfhydryl oxidase 1 OS=Homo sapiens GN=QSOX1 PE=1 SV=3	QSOX1_HUMAN	83	9.18	Homo Sapiens	0	0	0	0.00105561	0.000802168	0	0	0	0	0	0.00019566	0.00104212	0.00120801	0.000376157	0.000557999	0	0	0	0	0	0.000934714	0.00106103	0.00145498	0	0.00016331	0.000111893	0	0	0.000110439	0.00264484
166	Complement C2 OS=Homo sapiens GN=C2 PE=1 SV=2	CO2_HUMAN	83	7.43	Homo Sapiens	0	0.000109439	0	0.000909192	0.00113019	0.000173439	0	0	0	0	0.000393743	0.00142485	0.000472479	0.000376157	0.000383275	0.000123028	0.000380966	0	0.00102032	0.000334993	0	0	0	0.000149126	0	0.000288873	0.000446546	0.000273205	0.000270418	0.000657008
167	Keratin, type I cytoskeletal 17 OS=Homo sapiens GN=KRT17 PE=1 SV=2	K1C17_HUMAN	48	4.67	Homo Sapiens	0	0.00377154	0.00132438	0.00593247	0.00587671	0	0.00167723	0.00344585	0.00231088	0.000326267	0.00759492	0.0072079	0	0.00349592	0.00237934	0	0	0	0.00217855	0.000876835	0	0	0.00313516	0.000786789	0	0.00100751	0	0	0	0
168	Platelet basic protein OS=Homo sapiens GN=PPBP PE=1 SV=3	CXCL7_HUMAN	14	9.07	Homo Sapiens	0.0053709	0.00569254	0.00447006	0.00371345	0.00420695	0	0.00159957	0	0	0.00115371	0.00350797	0.00551394	0.00185356	0	0	0.00258774	0.00335757	0.00362098	0.00747443	0.00654456	0.00137319	0	0.00234055	0	0	0.00139898	0	0.00264405	0.00408213	0
169	Guanine nucleotide-binding protein G(i) subunit alpha-2 OS=Homo sapiens GN=GNAI2 PE=1 SV=3	GNAI2_HUMAN	40	5.2	Homo Sapiens	0.00188149	0.00199335	0.000937239	0.00162287	0.00186052	0	0.000631771	0.00129849	0.000200498	0	0.00132696	0	0.000872639	0	0.000343621	0	0	0.000645914	0.000872614	0.000357092	0	0	0	0.00188157	0.00234503	0.000729936	0.00102918	0.00126517	0.00022916	0
170	60 kDa heat shock protein, mitochondrial OS=Homo sapiens GN=HSPD1 PE=1 SV=2	CH60_HUMAN	61	5.55	Homo Sapiens	0.00266203	0.00181082	0.00204657	0.00122001	0.00101985	0	0	0.000154298	0.000127177	0	0	0	0	0	0	0	0	0	0.00122698	0.000468317	0	0	0	0	0	0.000783142	0.00147877	0.00106599	0.000566362	0
171	Leucine-rich alpha-2-glycoprotein OS=Homo sapiens GN=LRG1 PE=1 SV=2	A2GL_HUMAN	38	6.95	Homo Sapiens	0	0	0.000837137	0	0	0	0	0.000498292	0.000838949	0.00104913	0.00129744	0.00156366	0.00137716	0.000600413	0.000746049	0.000815555	0.000856246	0.000265113	0.0027487	0.000751772	0	0	0	0.00117211	0.00228236	0.000624303	0.00215748	0.00108949	0.000967939	0.00274444
172	Retinol-binding protein 4 OS=Homo sapiens GN=RBP4 PE=1 SV=3	RET4_HUMAN	23	5.85	Homo Sapiens	0	0.000756747	0	0.00183585	0.00223008	0.00174111	0.000432274	0.00143256	0.0013742	0.00243498	0.000542349	0.00080151	0.000758024	0	0	0.00135521	0.000412764	0.00242775	0.00151499	0.00179569	0.000835853	0.00190778	0.000631577	0	0	0.00290397	0	0.000814111	0.00229917	0.00300915
173	Peptidyl-prolyl cis-trans isomerase A OS=Homo sapiens GN=PPIA PE=1 SV=2	PPIA_HUMAN	18	7.97	Homo Sapiens	0.00485483	0.00441063	0.0051876	0.00234561	0.00392649	0	0	0	0.00110279	0	0.0029597	0.00150186	0.00266542	0	0	0	0	0	0	0.00271622	0.000823894	0	0	0	0	0.00106	0.00159376	0.00180626	0.000509244	0
174	ATP synthase subunit beta, mitochondrial OS=Homo sapiens GN=ATP5B PE=1 SV=3	ATPB_HUMAN	57	5.07	Homo Sapiens	0.00241637	0.00116447	0.000975764	0.00182409	0.00191257	0	0	0	0	0	0	0	0	0	0	0	0	0.000172898	0.000348843	0.000315708	0	0	0	0.00110629	0.00129368	0.00151327	0.00137087	0.00137574	0.00135517	0
175	Complement C1q subcomponent subunit A OS=Homo sapiens GN=C1QA PE=1 SV=2	C1QA_HUMAN	26	9.45	Homo Sapiens	0.000469009	0.00238846	0.00144191	0.00240457	0.00197276	0.00121136	0	0.000362006	0	0	0.00157641	0.00105088	0	0	0.000297408	0	0	0.00117068	0.00134363	0.00136594	0.000960284	0.00191947	0	0.00266519	0	0.000915201	0.00331755	0.00248573	0.00193747	0.000840039
176	WD repeat-containing protein 1 OS=Homo sapiens GN=WDR1 PE=1 SV=4	WDR1_HUMAN	66	6.64	Homo Sapiens	0.000851227	0.000670263	0.000660113	0.000795519	0.000707389	0	0.000226201	0.000213913	0	0	0.00186036	0.00144455	0.000991644	0	0	0	0	0.000388176	0	0.000269049	0	0	0	0	0	0	0.000561367	0	0	0
177	Apolipoprotein F OS=Homo sapiens GN=APOF PE=1 SV=2	APOF_HUMAN	35	5.36	Homo Sapiens	0	0	0.000364155	0.00148528	0.00123589	0.00264632	0.000864057	0.00148563	0.000458281	0	0.00128999	0	0.00149393	0	0	0.00103617	0	0.000882106	0.00057392	0.000507349	0.00115633	0	0	0	0.000387279	0	0.00233576	0.000778802	0.000987089	0
178	Neutrophil defensin 1 OS=Homo sapiens GN=DEFA1 PE=1 SV=1	DEF1_HUMAN	10	7.04	Homo Sapiens	0.00125853	0	0	0.000633951	0	0.00553176	0.00727972	0.00661195	0	0	0.00287138	0.00228388	0.00610049	0.00709497	0.00652925	0.00464021	0.00284781	0.00661295	0	0.00754087	0	0.00127454	0.002771	0.00193725	0.00265685	0.000928709	0.00286745	0.000900793	0.000885218	0
179	Keratin, type I cytoskeletal 13 OS=Homo sapiens GN=KRT13 PE=1 SV=4	K1C13_HUMAN	50	4.61	Homo Sapiens	0	0.00274355	0	0.00425872	0.0054037	0.00076361	0	0	0.000155156	0.000161519	0.00449948	0.00446958	0.00235294	0	0	0	0	0	0.000798826	0.000977838	0	0	0.000659187	0	0	0.000773767	0	0	0	0
180	Keratin, type II cuticular Hb6 OS=Homo sapiens GN=KRT86 PE=1 SV=1	KRT86_HUMAN	53	5.35	Homo Sapiens	0	0	0	0.000438118	0.000658646	0	0	0	0	0.000152376	0	0.00291691	0	0	0	0	0	0	0.000185104	0.00135456	0	0.00746639	0	0.00522148	0.00454181	0	0	0	0	0
181	Moesin OS=Homo sapiens GN=MSN PE=1 SV=3	MOES_HUMAN	68	6.32	Homo Sapiens	0.000644972	0.000974424	0.000645033	0.000287063	0.000694639	0	0	0	0	0.000118553	0.00180002	0.00066503	0.00102521	0	0	0	0	0	0.0010266	0.00107084	0	0	0	0.00129349	0.000685388	0.000142237	0.000118414	0.000415955	0	0
182	Clathrin heavy chain 1 OS=Homo sapiens GN=CLTC PE=1 SV=5	CLH1_HUMAN	192	5.42	Homo Sapiens	0.000228079	0.00032403	0	0.000251539	0.000370348	0	0	0	0	0	4.3261e-05	0	0	0	0	0	0	5.24703e-05	0.000413004	0.000216476	0	0	0	0.00045951	0.000629991	0.000125939	0.000341508	0.000215221	0.000141588	0
183	Keratin, type II cytoskeletal 4 OS=Homo sapiens GN=KRT4 PE=1 SV=4	K2C4_HUMAN	57	6.55	Homo Sapiens	0	0.000920092	0.000556713	0.00340677	0.00425832	0.000599999	0	0	0.000555401	0.000772418	0.00229983	0.00215345	0	0	0	0	0	0	0.000869482	0.00119439	0	0	0.00114974	0	0	0	0	0	0	0
184	L-lactate dehydrogenase B chain OS=Homo sapiens GN=LDHB PE=1 SV=2	LDHB_HUMAN	37	5.93	Homo Sapiens	0.00152911	0.0020353	0.00134832	0.000613437	0.00117227	0	0	0	0	0	0.00154706	0.00110768	0.00129549	0.00143748	0.00172909	0	0	0	0	0.000723105	0.000920397	0.00101888	0.000351137	0	0.00396207	0.000909419	0.00121898	0.000635264	0	0
185	Ig kappa chain V-I region AG OS=Homo sapiens PE=1 SV=1	KV101_HUMAN	12	5.77	Homo Sapiens	0	0	0	0.000856936	0.00104351	0	0.00207263	0.000784702	0	0	0	0	0	0	0	0.00259748	0.0011867	0.00131352	0.000839461	0.00112471	0	0	0	0	0.00282786	0.00122411	0.00169694	0.00151434	0	0
186	Zinc-alpha-2-glycoprotein OS=Homo sapiens GN=AZGP1 PE=1 SV=2	ZA2G_HUMAN	34	5.92	Homo Sapiens	0	0.000514169	0	0.000962215	0.000925789	0	0.000292421	0.000553656	0.000702943	0	0.000966527	0.00213123	0.000259242	0	0.000200617	0.000303099	0.000977145	0.00327822	0	0	0	0	0	0	0	0.00168386	0.00157366	0.000529878	0.00105992	0
187	Alpha-enolase OS=Homo sapiens GN=ENO1 PE=1 SV=2	ENOA_HUMAN	47	7.46	Homo Sapiens	0.00172541	0.00169323	0.000271179	0.000752458	0.000672223	0	0.000217426	0	0.000341273	0	0.000695227	0.000392228	0.00065002	0.00169745	0.00114242	0	0	0	0	0.00019144	0	0	0	0	0	0.000504756	0.00156807	0.000882524	0.000383374	0
188	Adenylyl cyclase-associated protein 1 OS=Homo sapiens GN=CAP1 PE=1 SV=5	CAP1_HUMAN	52	8.2	Homo Sapiens	0.0014473	0.00128084	0.000347627	0.00112169	0.00143569	0	0	0	0	0.000388266	0.000468455	0.000346583	0.000333261	0	0	0	0	0	0	0	0	0.000724971	0	0	0	0.000735224	0.000636573	0.000884281	0.000176277	0
189	Serum amyloid P-component OS=Homo sapiens GN=APCS PE=1 SV=2	SAMP_HUMAN	25	6.52	Homo Sapiens	0	0	0	0.00065459	0.00106241	0.00305741	0.00220454	0.00188933	0.000620624	0.00207462	0.00213059	0.0021825	0.00227167	0.000727521	0.00130482	0.00206707	0.00167205	0.000604457	0	0.000890242	0	0.00201007	0.00162808	0.00175818	0.000518651	0.000944109	0.000335553	0	0	0
190	Isocitrate dehydrogenase [NADP], mitochondrial OS=Homo sapiens GN=IDH2 PE=1 SV=2	IDHP_HUMAN	51	8.95	Homo Sapiens	0.000735266	0.00216886	0	0.00202351	0.00208103	0	0	0	0	0	0	0	0	0	0	0	0	0	0	0	0	0	0	0	0	0.000750825	0.000565803	0.000815661	0.00181032	0
191	Collagen alpha-3(VI) chain OS=Homo sapiens GN=COL6A3 PE=1 SV=5	CO6A3_HUMAN	344	6.65	Homo Sapiens	0	0	0	3.68576e-05	0	0	0	0	0	0	0.000679251	0.000752998	0.000177469	0	0	0	0	0	0.000144627	0.000118189	0	0	0	0	0	0	0	0	0	0
192	Kallistatin OS=Homo sapiens GN=SERPINA4 PE=1 SV=3	KAIN_HUMAN	49	7.85	Homo Sapiens	0	0	0	0.00198192	0.0019168	0.0015599	0	0	0	0	0.000169513	0.000745718	0.000175925	0	0	0.000841825	0.000751515	0.000406724	0.000404575	0.000194336	0.000247979	0.000769357	0.000296454	0.00103235	0	0	0	0	0.000187069	0.00153499
193	Coagulation factor XI OS=Homo sapiens GN=F11 PE=1 SV=1	FA11_HUMAN	70	8.14	Homo Sapiens	0	0.000378409	0.000182077	0.001938	0.00205438	0	0.000426551	0	0.000224255	0.000227234	0.000706986	0.000588435	0.000433557	0	0	0	0	0.000140789	0.000354729	0	0	0	0	0	0	0.000417107	0	0	0.000130949	0
194	Histone H2B type 1-C/E/F/G/I OS=Homo sapiens GN=HIST1H2BC PE=1 SV=4	H2B1C_HUMAN	14	11	Homo Sapiens	0.00265495	0.0025246	0.000860792	0.000452822	0	0.00109087	0.00323527	0.00539511	0	0	0.00144333	0.00128731	0.00186742	0.00384093	0.00180292	0.00185232	0.000678019	0.00504451	0	0	0	0	0	0	0	0	0	0	0	0
195	C4b-binding protein beta chain OS=Homo sapiens GN=C4BPB PE=1 SV=1	C4BPB_HUMAN	28	4.8	Homo Sapiens	0.00110274	0.000948757	0.00133891	0.000810486	0.000267421	0	0.000364965	0.000504223	0	0	0.00102532	0.000476147	0.000772848	0.00173059	0.00153043	0	0	0	0	0.00174614	0	0.000441463	0.000464003	0.000445479	0.000947179	0.000349746	0.000293122	0.000649002	0.000327371	0
196	LIM and senescent cell antigen-like-containing domain protein 1 OS=Homo sapiens GN=LIMS1 PE=1 SV=4	LIMS1_HUMAN	37	8.08	Homo Sapiens	0.00101347	0.000245499	0	0.000784679	0.000417464	0	0	0	0.000214597	0.000217881	0.000888294	0.00111101	0.00082308	0	0	0	0	0	0	0.00156458	0	0.00119111	0	0	0.000915862	0.00181037	0.00155172	0.00124813	0.0010936	0
197	Solute carrier family 2, facilitated glucose transporter member 1 OS=Homo sapiens GN=SLC2A1 PE=1 SV=2	GTR1_HUMAN	54	8.92	Homo Sapiens	0	0.000653816	0	0	0.000297614	0.000316666	0.00102318	0.00122538	0.000434364	0.000444116	0.000682014	0.000845083	0.000886676	0.000155654	0.00012822	0.000765444	0.000870506	0.00149838	0.000828057	0.00141544	0	0	0	0	0	0.000179113	0.000149114	0.000775462	0.000254622	0
198	Platelet glycoprotein 4 OS=Homo sapiens GN=CD36 PE=1 SV=2	CD36_HUMAN	53	8.06	Homo Sapiens	0.000239982	0.000837538	0	0.000916236	0.0008809	0	0	0	0	0.000295487	0.000235079	0	0.000164326	0	0	0	0	0	0.000185104	0.000687182	0.000750896	0.000233226	0.0004975	0.000599056	0.000500397	0.00035772	0.00061357	0.0012142	0.000994789	0
199	C-reactive protein OS=Homo sapiens GN=CRP PE=1 SV=1	CRP_HUMAN	25	5.32	Homo Sapiens	0	0	0	0.000791273	0.00141353	0	0	0	0	0	0.00359668	0.00219407	0.00278857	0.0031742	0.00341816	0	0	0	0	0.00195091	0	0	0	0	0	0.000386883	0.00213655	0	0	0
200	Protein S100-A8 OS=Homo sapiens GN=S100A8 PE=1 SV=1	S10A8_HUMAN	11	7.07	Homo Sapiens	0	0.000825768	0	0.00179835	0.00395378	0	0.00410648	0.00430382	0.0043087	0.00109931	0.00558086	0.00414859	0.00356507	0.00081206	0.000620089	0	0	0.00276706	0.00180764	0.00521939	0	0	0	0	0	0.00087928	0.000732016	0	0.00163805	0
201	HLA class I histocompatibility antigen, B-55 alpha chain OS=Homo sapiens GN=HLA-B PE=1 SV=1	1B55_HUMAN	40	5.85	Homo Sapiens	0.000635952	0.001438	0	0.00220346	0.00234514	0	0.000383213	0.0010618	0	0	0.00152996	0.000555505	0.000431016	0.000210133	0	0	0	0.00052541	0.00124634	0.00102359	0.000455662	0.001406	0	0	0	0.0015552	0.0017415	0.00115257	0.00148356	0
202	Actin, alpha cardiac muscle 1 OS=Homo sapiens GN=ACTC1 PE=1 SV=1	ACTC_HUMAN	42	5.05	Homo Sapiens	0.0119542	0.00843792	0.0081055	0.00505113	0	0	0	0	0	0	0.00604438	0.00477524	0.00467574	0	0	0	0	0.00152521	0	0	0.00194204	0	0	0.000294702	0.000631453	0.0051077	0.0089149	0.00630327	0.00869688	0
203	Ig gamma-4 chain C region OS=Homo sapiens GN=IGHG4 PE=1 SV=1	IGHG4_HUMAN	36	7.41	Homo Sapiens	0	0.00290086	0	0.00413582	0.00187195	0	0.00588039	0.00839844	0.0043887	0.00644667	0	0	0	0.00173691	0.00370781	0.0121989	0.00935276	0.00701883	0.01439	0.0128615	0	0	0	0.000515728	0.0013028	0.0058133	0.00594638	0.00948554	0.00546203	0.0065791
204	Hyaluronan-binding protein 2 OS=Homo sapiens GN=HABP2 PE=1 SV=1	HABP2_HUMAN	63	6.52	Homo Sapiens	0	0	0	0	0	0	0.000162207	0	0.000126033	0.000124292	0.000581706	0	0.000343488	0	0.000410333	0	0	0	0.00031467	0.000504421	0.000203435	0	0.000209266	0	0	0.000759239	0	0.000218193	0.00154941	0.000462244
205	Solute carrier family 2, facilitated glucose transporter member 3 OS=Homo sapiens GN=SLC2A3 PE=2 SV=1	GTR3_HUMAN	54	7.24	Homo Sapiens	0.00045888	0.000491948	0.000223168	0.00126566	0.00137598	0	0.000465416	0	0.000148517	0.000217511	0.000300737	0.000341384	0	0	0	0.000189098	0.000167302	0	0.000272515	0.000176342	0	0	0	0	0	0.00088466	0.00113945	0.000858869	0.000678233	0
206	Dermcidin OS=Homo sapiens GN=DCD PE=1 SV=2	DCD_HUMAN	11	6.52	Homo Sapiens	0.00623978	0.0028279	0.00453526	0.00501404	0.00390398	0.00138838	0.00135721	0	0.00214062	0.00363544	0.00559824	0.00494904	0.000791751	0	0.000620089	0	0	0	0.0013378	0.00291281	0.00110464	0.00456833	0.00251909	0.00225917	0.00364757	0.00131892	0	0	0	0
207	Tubulin alpha-4A chain OS=Homo sapiens GN=TUBA4A PE=1 SV=1	TBA4A_HUMAN	50	4.69	Homo Sapiens	0.00162724	0.000957285	0.000380792	0.00273398	0.00322102	0	0.000597172	0	0.00086669	0.00103933	0.000498367	0	0	0	0	0	0	0	0.00119591	0.000476122	0.00238785	0.00150256	0.00052735	0	0	0.00421345	0.00394012	0.00322437	0.00365303	0
208	Ig heavy chain V-III region TIL OS=Homo sapiens PE=1 SV=1	HV304_HUMAN	12	9.4	Homo Sapiens	0	0	0.00264439	0	0	0	0	0.00198394	0	0	0	0	0	0	0	0	0	0	0	0.00221965	0	0	0	0	0	0	0.00234855	0	0.00118166	0
209	Ig lambda chain V-III region LOI OS=Homo sapiens PE=1 SV=1	LV302_HUMAN	12	4.72	Homo Sapiens	0	0	0	0	0	0	0.0025317	0.00669571	0	0	0	0.000775041	0	0.00295197	0.00178979	0.00299005	0.00118653	0.000875683	0	0	0	0	0	0	0.00112956	0.00120901	0.0010486	0.000750661	0.00262116	0.00869072
210	Alpha-amylase 1 OS=Homo sapiens GN=AMY1A PE=1 SV=2	AMY1_HUMAN	58	6.92	Homo Sapiens	0.000644309	0.00128919	0.000853246	0.000668911	0.0001291	0	0	0	0	0	0.00197046	0.00361255	0	0	0	0	0	0	0	0.000763345	0	0	0	0.000320107	0.000457259	0	0	0	0	0
211	Integrin alpha-6 OS=Homo sapiens GN=ITGA6 PE=1 SV=5	ITA6_HUMAN	127	6.57	Homo Sapiens	0.000150225	0.000278001	0.000100358	0.000642054	0.000649261	0	0	7.41451e-05	0	0	0.000130883	6.99849e-05	0	0	0	0	0	0	7.72482e-05	0.000275891	0.000116772	0	0	0	0	0.000188791	0.00015973	0.000217136	0.000177967	0
212	Platelet glycoprotein Ib alpha chain OS=Homo sapiens GN=GP1BA PE=1 SV=2	GP1BA_HUMAN	72	6.24	Homo Sapiens	0.000174796	0.000490362	0	0.000729275	0.000977281	0	0	0	0.000220558	0	0	0	0	0	0	0	0	0	0	0.000304151	0.000168764	0	0	0.000352617	0.00018826	0.000863162	0.000967684	0.000706707	0.00155704	0
213	Suprabasin OS=Homo sapiens GN=SBSN PE=1 SV=2	SBSN_HUMAN	61	7.01	Homo Sapiens	0.000408414	0.000435495	0	0.00100792	0.000703997	0.000280328	0.000167525	0.000464779	0	0	0.000873272	0.000968683	0.000428587	0.000725475	0.000590672	0.00016894	0.000233416	0	0	0	0	0	0	0	0	0	0	0	0	0
214	Erythrocyte membrane protein band 4.2 OS=Homo sapiens GN=EPB42 PE=1 SV=3	EPB42_HUMAN	77	8.17	Homo Sapiens	0	0	0	0.000123497	0.000208716	0	0	0	0.000104155	0.000104696	0.000524976	0.000354842	0.000905379	0	0.000150635	0	0	0	0.000451057	0.000185502	0	0	0	0	0	0.000496515	0	0.00174489	0.00029761	0.00173198
215	ATP synthase subunit alpha, mitochondrial OS=Homo sapiens GN=ATP5A1 PE=1 SV=1	ATPA_HUMAN	60	9.56	Homo Sapiens	0.000624976	0.000891216	0.000317327	0.00140737	0.0017565	0	0	0	0	0.000395373	0	0	0	0	0	0	0	0	0.000749136	0.000829968	0	0	0	0.000518127	0.000780886	0.000406024	0.000614699	0	0.000524233	0
216	Lysozyme C OS=Homo sapiens GN=LYZ PE=1 SV=1	LYSC_HUMAN	17	9.35	Homo Sapiens	0.00145762	0.0013022	0.00220527	0.00152116	0.000945361	0	0	0.000560173	0.000456341	0	0.00216669	0.00188077	0.00179759	0	0	0	0	0	0	0	0.000714764	0	0.00239424	0	0	0.00475967	0.00168674	0.000562378	0.00417056	0
217	Coagulation factor IX OS=Homo sapiens GN=F9 PE=1 SV=2	FA9_HUMAN	52	5.16	Homo Sapiens	0	0	0	0	0	0.00136664	0	0	0	0	0.00189249	0.00219118	0.00209481	0	0	0	0	0.000572783	0	0	0	0	0	0	0	0	0	0	0	0
218	Platelet endothelial cell adhesion molecule OS=Homo sapiens GN=PECAM1 PE=1 SV=1	PECA1_HUMAN	83	6.99	Homo Sapiens	0.000153242	0.000854876	0	0.0013323	0.000745766	0	0	0	0.00033249	0.000577454	0	0.000222105	0	0	0	0	0	0	0	0	0	0	0	0.000155602	0	0.000286689	0.000246592	0.000110411	0.000496479	0
219	Filaggrin OS=Homo sapiens GN=FLG PE=1 SV=3	FILA_HUMAN	435	9.6	Homo Sapiens	2.89317e-05	7.10724e-05	0	0.000191747	0.000117194	0	0	0	0	0	0.000178898	0.000125339	0	0	0	0	0	0	0	0	0	0	0	0	0	0	0	0	0	0
220	Platelet glycoprotein Ib beta chain OS=Homo sapiens GN=GP1BB PE=1 SV=1	GP1BB_HUMAN	22	9.37	Homo Sapiens	0.00285164	0.00160482	0.00311847	0.00028816	0.000691403	0	0.000678604	0	0	0	0.000738172	0.00042275	0.000787708	0	0	0.000476111	0	0.000477645	0	0	0.0016872	0.00200324	0.000599261	0.00141089	0.00213185	0.00130691	0.00167645	0.00169513	0	0
221	Desmocollin-1 OS=Homo sapiens GN=DSC1 PE=1 SV=2	DSC1_HUMAN	100	5.08	Homo Sapiens	0	0.000396574	0.000180766	0.000609744	0.000472355	0	0	9.41643e-05	0.000198502	0	0.000653563	0.000819684	0.000175235	8.40531e-05	0.000214774	0	0	0	0	0	0	0	0	0.000885427	0.000663025	0.000287521	0	0	0	0
222	78 kDa glucose-regulated protein OS=Homo sapiens GN=HSPA5 PE=1 SV=2	GRP78_HUMAN	72	4.8	Homo Sapiens	0.00078122	0.000737922	0.000953231	0.00072201	0.000662022	0	0	0	0.000932548	0	0.000684692	0	0	0	9.47358e-05	0	0	0	0.000413004	0.000187452	0	0	0	0	0	0.00046215	0.000968944	0.000711628	0.000439043	0
223	Integrin alpha-M OS=Homo sapiens GN=ITGAM PE=1 SV=2	ITAM_HUMAN	127	7.24	Homo Sapiens	0	0	0	0	0	0	0.00091445	0.0012278	0.00102571	0.000568105	6.54025e-05	0.000109848	0	0.000521415	0.000615163	0	0	0.000239667	7.88477e-05	0.000346739	0	0	0	0	0	0	0	0	0	0
224	Coronin-1C OS=Homo sapiens GN=CORO1C PE=1 SV=1	COR1C_HUMAN	53	7.09	Homo Sapiens	0.000239982	0.000165644	0	0.000851562	0.000668981	0	0	0	0	0	0	0	0.000162647	0	0	0	0	0	0	0	0	0	0	0	0	0.00117011	0.00116095	0.0013044	0.000518078	0
225	Myosin regulatory light chain 12A OS=Homo sapiens GN=MYL12A PE=1 SV=2	ML12A_HUMAN	20	4.4	Homo Sapiens	0.000609712	0.002876	0	0.00600345	0.00548795	0	0.000510951	0	0	0	0.00143569	0	0	0	0	0	0	0	0	0	0	0	0	0	0	0	0	0	0	0
226	Phosphatidylinositol-glycan-specific phospholipase D OS=Homo sapiens GN=GPLD1 PE=1 SV=3	PHLD_HUMAN	92	6.33	Homo Sapiens	0	0	0	0	0	0.000444806	0.000219145	0.000102306	0	0	0	0	0	9.1362e-05	0.00023345	0.00106894	0.000761418	0.000770001	0.000541106	0.00030481	0	0	0	0.000135581	0	0.000211576	0	0.000149415	9.62193e-05	0.000738928
227	Catalase OS=Homo sapiens GN=CAT PE=1 SV=3	CATA_HUMAN	60	7.41	Homo Sapiens	0	0.000442753	0	0.000219798	0.000208701	0	0	0	0.000129297	0	0.00156163	0.000300372	0.00130645	0	0	0	0	0	0	0	0	0	0	0	0	0.000559802	0.000276604	0.000851351	0	0
228	Endoplasmin OS=Homo sapiens GN=HSP90B1 PE=1 SV=1	ENPL_HUMAN	92	4.48	Homo Sapiens	0.00013825	0.000479187	0	0.000249512	0.000340022	0	0	0	0	0.000175252	0.000353146	0	9.5807e-05	0.000197696	0	0	0	0	0	0	0	0	0	0	0	0.000264798	0.000352626	0.00020183	0.000293781	0
229	Zyxin OS=Homo sapiens GN=ZYX PE=1 SV=1	ZYX_HUMAN	61	6.65	Homo Sapiens	0	0.000578161	0	0.000376314	0.000126608	0	0	0	0.000388816	0	0	0	0	0	0	0	0	0	0.000654776	0.000599012	0	0	0	0	0	0.00133791	0.0015505	0.00128356	0.000942034	0
230	Ig kappa chain V-IV region B17 OS=Homo sapiens PE=2 SV=1	KV404_HUMAN	15	6.51	Homo Sapiens	0.00121942	0.0020738	0	0.000879193	0.00208277	0.00197784	0	0	0	0.000538396	0.00108331	0.00120149	0	0.00117738	0.00188999	0	0	0.00170798	0	0.00058397	0	0	0	0.000831561	0.000906816	0.000619139	0.00439287	0.00241773	0.000611093	0.000970712
231	Histone H2A type 2-A OS=Homo sapiens GN=HIST2H2AA3 PE=1 SV=3	H2A2A_HUMAN	14	11.55	Homo Sapiens	0	0.000648818	0	0	0	0.00109087	0.000710164	0	0	0.000838972	0	0.000652445	0.00125168	0.00470692	0.00257732	0	0	0.00363647	0.00177364	0.00252824	0	0	0	0	0	0	0	0	0	0
232	Ig heavy chain V-III region TRO OS=Homo sapiens PE=1 SV=1	HV301_HUMAN	13	10	Homo Sapiens	0	0.000698727	0	0	0	0	0	0	0	0.000621226	0	0	0	0	0	0	0	0	0	0	0	0	0	0	0	0	0	0	0	0
233	Carboxypeptidase N catalytic chain OS=Homo sapiens GN=CPN1 PE=1 SV=1	CBPN_HUMAN	52	7.36	Homo Sapiens	0	0	0	0	0	0	0	0	0	0	0	0	0	0	0	0	0	0	0	0	0	0	0	0	0	0.00138347	0.000865862	0.000974706	0.0027495	0.00200555
234	Ig mu heavy chain disease protein OS=Homo sapiens PE=1 SV=1	MUCB_HUMAN	43	4.89	Homo Sapiens	0	0.0153348	0	0	0	0	0	0	0	0	0.00328773	0.00482594	0	0	0	0	0	0.000366565	0.000926506	0.00125441	0	0	0	0.00131228	0.000616768	0	0.00399933	0	0.00821934	0
235	Ig lambda chain V-I region HA OS=Homo sapiens PE=1 SV=1	LV102_HUMAN	12	9.12	Homo Sapiens	0	0	0	0.0005277	0	0.001425	0.00207263	0	0	0	0	0	0.000725771	0	0	0.00559065	0.0050656	0.00125929	0	0	0	0	0	0	0	0.00116089	0.00410807	0.00231104	0.00110652	0
236	Ig heavy chain V-III region GAL OS=Homo sapiens PE=1 SV=1	HV320_HUMAN	13	8.7	Homo Sapiens	0	0.00239284	0.000927006	0.000791018	0.00240631	0	0	0.0010988	0	0	0.00124921	0.00386166	0	0.000646562	0.000594816	0	0	0	0	0	0	0	0	0	0	0.000714392	0.00187611	0.00144035	0.00102141	0
237	Apolipoprotein A-V OS=Homo sapiens GN=APOA5 PE=1 SV=1	APOA5_HUMAN	41	6.4	Homo Sapiens	0.000607641	0.000221548	0	0.000309071	0.000182629	0.000351108	0.000242495	0	0	0	0.000202588	0.000557045	0.000318631	0	0	0	0	0	0	0.000213647	0	0	0	0	0	0.000339772	0	0	0.00076717	0
238	CD9 antigen OS=Homo sapiens GN=CD9 PE=1 SV=4	CD9_HUMAN	25	7.19	Homo Sapiens	0.000508762	0.00069927	0.000482043	0.000506876	0	0	0	0	0	0	0.000498367	0.000365369	0.000344813	0	0	0	0	0	0	0	0	0	0	0	0	0	0.000814532	0	0	0
239	Ig heavy chain V-III region BUT OS=Homo sapiens PE=1 SV=1	HV306_HUMAN	12	9.48	Homo Sapiens	0	0	0	0.00162728	0.00131965	0	0	0	0	0	0.000661139	0.000740674	0	0	0	0.00214695	0.00197756	0	0.000839461	0.000793537	0	0	0	0	0	0.000773924	0.00276604	0	0.0011458	0
240	Beta-parvin OS=Homo sapiens GN=PARVB PE=1 SV=1	PARVB_HUMAN	42	6.72	Homo Sapiens	0	0.000423477	0	0.00131934	0.00121099	0	0	0	0	0	0	0.000211621	0	0	0	0	0	0	0	0	0.000594462	0.00179792	0	0	0	0.000580034	0.000784442	0.000214474	0	0
241	Prenylcysteine oxidase 1 OS=Homo sapiens GN=PCYOX1 PE=1 SV=3	PCYOX_HUMAN	57	6.1	Homo Sapiens	0	0	0	0	0	0	0	0	0	0	0	0	0	0.00179992	0.00210023	0.000362908	0.000158497	0	0	0	0	0	0.000231294	0	0	0	0	0	0	0
242	Vasodilator-stimulated phosphoprotein OS=Homo sapiens GN=VASP PE=1 SV=3	VASP_HUMAN	40	9.41	Homo Sapiens	0	0	0	0	0	0	0	0.000235411	0	0	0	0	0	0	0	0	0	0	0	0	0	0	0	0	0	0.00165865	0.00235157	0.00151499	0.000675697	0
243	14-3-3 protein epsilon OS=Homo sapiens GN=YWHAE PE=1 SV=1	1433E_HUMAN	29	4.36	Homo Sapiens	0.00106932	0.00259151	0	0.00222942	0.000689995	0	0	0	0	0	0.00211722	0.000612971	0.000297252	0	0	0	0	0	0.00121267	0.00112212	0	0.000434213	0	0	0	0	0.000850397	0.000805123	0	0
244	Selenoprotein P OS=Homo sapiens GN=SEPP1 PE=1 SV=3	SEPP1_HUMAN	43	7.92	Homo Sapiens	0	0.00041541	0	0.000681106	0.000530611	0	0	0	0	0	0	0.000738764	0.000204982	0	0	0	0	0.000707853	0	0	0	0.000292842	0.00033782	0	0	0	0	0.000213119	0.000521969	0
245	Calnexin OS=Homo sapiens GN=CANX PE=1 SV=2	CALX_HUMAN	68	4.21	Homo Sapiens	0.000551449	0.000457455	0	0.000811147	0.00120627	0	0	0	0.000114085	0	0	0	0	0.000123607	0.000214023	0	0	0	0	0	0	0	0	0	0	0.000280588	0.000305745	0.00040783	0.000264979	0
246	Calmodulin-like protein 5 OS=Homo sapiens GN=CALML5 PE=1 SV=2	CALL5_HUMAN	16	4.05	Homo Sapiens	0.00234366	0.00193467	0.0019882	0.00183092	0.00171378	0	0	0	0.000496254	0	0.00231405	0.00341535	0	0	0	0	0	0	0	0	0	0	0.000823984	0	0	0	0	0	0	0
247	Sex hormone-binding globulin OS=Homo sapiens GN=SHBG PE=1 SV=2	SHBG_HUMAN	44	6.7	Homo Sapiens	0	0	0	0.000432078	0.000170177	0	0	0	0	0	0	0	0	0.000906591	0.000488124	0	0	0	0.000227583	0.000204493	0	0	0.00140501	0	0	0	0.000186532	0.0011537	0	0
248	Carboxypeptidase B2 OS=Homo sapiens GN=CPB2 PE=1 SV=2	CBPB2_HUMAN	48	7.77	Homo Sapiens	0	0	0	0.000263998	0	0	0	0	0	0	0	0.0012293	0.00018363	0.0010205	0.000213156	0	0	0	0	0	0	0	0	0	0	0	0	0	0.00018442	0.00113608
249	14-3-3 protein eta OS=Homo sapiens GN=YWHAH PE=1 SV=4	1433F_HUMAN	28	4.47	Homo Sapiens	0	0.000621614	0.00111319	0.000905137	0.000979302	0	0	0	0	0	0.00160566	0.000317432	0.000622663	0	0	0	0	0	0	0	0	0	0	0	0	0	0.00131444	0.00115409	0.000491057	0
250	Carboxypeptidase N subunit 2 OS=Homo sapiens GN=CPN2 PE=1 SV=3	CPN2_HUMAN	61	5.89	Homo Sapiens	0	0	0	0.000415473	0.00020528	0	0.000244742	0	0.000130165	0	0	0.000298173	0	0	0.000113506	0.000508051	0.000148104	0	0	0	0	0.00020894	0	0	0	0.000542333	0.000137522	0.000454631	0.000145118	0.000358049
251	Thymosin beta-4 OS=Homo sapiens GN=TMSB4X PE=1 SV=2	TYB4_HUMAN	5	4.72	Homo Sapiens	0.012469	0.00355721	0.0050877	0.00390548	0.00321423	0	0	0	0.00240598	0	0.00574177	0.00182685	0.00522876	0	0	0	0	0	0	0.00350382	0.0024302	0	0.00263675	0	0	0.00290162	0.00331925	0	0	0
252	Junctional adhesion molecule A OS=Homo sapiens GN=F11R PE=1 SV=1	JAM1_HUMAN	33	8.02	Homo Sapiens	0.000750894	0.00134398	0.000751409	0.000503504	0.000827358	0	0	0	0.000240608	0	0	0.000269336	0	0	0	0	0	0	0	0	0	0	0	0	0	0.000718895	0.00136674	0.000699161	0.0017995	0
253	Triosephosphate isomerase OS=Homo sapiens GN=TPI1 PE=1 SV=3	TPIS_HUMAN	31	5.72	Homo Sapiens	0.000615438	0.00128541	0.000409454	0.000842739	0.000894611	0	0	0	0	0	0.00198047	0.00132207	0.000985514	0	0	0	0	0	0	0	0	0	0	0	0	0.0003159	0	0.000295617	0	0
254	Protein disulfide-isomerase A3 OS=Homo sapiens GN=PDIA3 PE=1 SV=4	PDIA3_HUMAN	57	6.28	Homo Sapiens	0.00109955	0.000152677	0	0.000402847	0.000465968	0	0	0	0	0	0	0	0	0	0	0	0	0	0.000172114	0	0	0	0	0.000879708	0.0009254	0.000171805	0.000719276	0.000486535	0.000474173	0
255	Integrin beta-2 OS=Homo sapiens GN=ITGB2 PE=1 SV=2	ITB2_HUMAN	85	6.94	Homo Sapiens	0	0	0	0	0	0	0.000830172	0.00200133	0.0015316	0.00183267	0.000237725	0	0	9.88859e-05	0.000465833	0	0	0	0	0	0	0	0	0	0	0	0	0	0	0
256	Actin-related protein 3 OS=Homo sapiens GN=ACTR3 PE=1 SV=3	ARP3_HUMAN	47	5.69	Homo Sapiens	0	0.000851877	0	0.00061765	0.000834041	0	0	0	0	0	0.00078359	0	0	0	0	0	0	0	0	0	0	0	0	0	0	0.000208359	0.000786652	0.000395071	0.000480889	0
257	Tropomyosin alpha-3 chain OS=Homo sapiens GN=TPM3 PE=1 SV=2	TPM3_HUMAN	33	4.38	Homo Sapiens	0.00147809	0.00203215	0	0.00257459	0.00296908	0	0	0	0	0	0	0	0	0	0	0	0	0	0	0.000265441	0	0	0	0	0.000392917	0.000844281	0.00109802	0	0.00067062	0
258	Superoxide dismutase [Mn], mitochondrial OS=Homo sapiens GN=SOD2 PE=1 SV=2	SODM_HUMAN	25	8.45	Homo Sapiens	0	0.00107478	0	0.00167852	0.00188942	0	0	0	0	0	0	0	0	0	0	0	0	0	0	0	0	0	0	0	0.00106274	0.00115008	0.00163995	0.0011093	0.00107483	0
259	Kinesin-like protein KIF20B OS=Homo sapiens GN=KIF20B PE=1 SV=3	KI20B_HUMAN	211	5.37	Homo Sapiens	0	0	0	0	0	0	0	0	0	0	0	0	0	0	0	0	0	0	0	0	0	0	0.000103267	0	0	0	0	0	0	0
260	Heat shock protein HSP 90-alpha OS=Homo sapiens GN=HSP90AA1 PE=1 SV=5	HS90A_HUMAN	85	4.66	Homo Sapiens	0	0.000260439	0	0.000378857	0.00023035	0	0	0	0	0	9.78354e-05	0	0.000102462	0.00104317	0.000793393	0	0	0	0.00111138	0.000855271	0	0	0	0	0	0	0.000144837	0	0	0
261	Guanine nucleotide-binding protein G(I)/G(S)/G(T) subunit beta-1 OS=Homo sapiens GN=GNB1 PE=1 SV=3	GBB1_HUMAN	37	5.85	Homo Sapiens	0	0.00119046	0	0.000342484	0.000417464	0	0	0.000386065	0.00020967	0	0	0	0.000238223	0	0.000371482	0.000554504	0	0	0	0	0	0	0	0	0.000735256	0.000251002	0.00110807	0.000243457	0.00038324	0
262	Transgelin-2 OS=Homo sapiens GN=TAGLN2 PE=1 SV=3	TAGL2_HUMAN	22	8.45	Homo Sapiens	0	0.000794625	0	0.00104342	0.00155833	0	0	0	0	0	0.00109879	0.00042275	0	0	0	0	0	0	0	0	0	0.00200324	0	0	0	0.0017378	0.00149757	0.00273487	0	0
263	P-selectin OS=Homo sapiens GN=SELP PE=1 SV=3	LYAM3_HUMAN	91	6.57	Homo Sapiens	0.00027807	0.000390071	0	0.000611841	0.00064593	0	0	0	0	0	0	0	0	0	0	0	0	0	0	0	0	0	0	0	0	0.0003691	0.000588669	0.000299539	0.00010073	0
264	Adipocyte plasma membrane-associated protein OS=Homo sapiens GN=APMAP PE=1 SV=2	APMAP_HUMAN	46	6.02	Homo Sapiens	0	0	0	0	0	0.000703743	0.000540687	0	0	0	0	0	0	0.000852202	0.000775611	0	0	0.000675884	0	0.000310514	0	0	0	0.000269075	0	0.000730176	0.000178422	0	0.000298904	0.000474805
265	L-lactate dehydrogenase A chain OS=Homo sapiens GN=LDHA PE=1 SV=2	LDHA_HUMAN	37	8.45	Homo Sapiens	0.000515637	0.00070872	0	0	0	0	0	0	0	0	0	0.000377047	0	0.0015784	0.00134668	0	0	0	0	0.000355117	0.00101219	0.00101161	0.000526706	0.000337119	0	0.000397009	0	0.000365186	0	0
266	Serum deprivation-response protein OS=Homo sapiens GN=SDPR PE=1 SV=3	SDPR_HUMAN	47	4.88	Homo Sapiens	0	0	0	0.000617726	0.000986706	0	0	0	0	0.000257743	0	0	0	0	0	0	0	0	0	0	0	0	0	0	0	0.000510137	0.000786373	0.000500101	0.000584216	0
267	Prostaglandin G/H synthase 1 OS=Homo sapiens GN=PTGS1 PE=1 SV=2	PGH1_HUMAN	69	7.25	Homo Sapiens	0.000727791	0.000258878	0.000277074	0.000615741	0.000560176	0	0	0	0	0	0	0	0	0	0	0	0	0	0	0	0	0	0	0	0	0.000141926	0	0.000606883	0	0
268	Peroxiredoxin-2 OS=Homo sapiens GN=PRDX2 PE=1 SV=5	PRDX2_HUMAN	22	5.76	Homo Sapiens	0.000554283	0	0	0.000287836	0.000379457	0	0	0	0	0	0.00278174	0.00165154	0.0031624	0	0	0	0	0	0	0	0	0	0	0	0	0	0	0	0	0
269	Fetuin-B OS=Homo sapiens GN=FETUB PE=1 SV=2	FETUB_HUMAN	42	6.83	Homo Sapiens	0	0	0	0.000772878	0.000933331	0	0	0	0.00038	0.000191943	0	0	0.00166217	0	0	0	0	0	0.00154362	0.000995273	0.000747038	0	0.000780183	0	0	0.000451409	0	0	0.000429014	0.000346683
270	Transforming protein RhoA OS=Homo sapiens GN=RHOA PE=1 SV=1	RHOA_HUMAN	22	5.89	Homo Sapiens	0.00112634	0	0.000547776	0.000719914	0	0	0	0	0	0	0.000377551	0	0	0	0	0	0	0	0	0	0	0.00171357	0.00125083	0	0	0.000422141	0	0.000826002	0.000416654	0
271	Thromboxane-A synthase OS=Homo sapiens GN=TBXAS1 PE=1 SV=3	THAS_HUMAN	61	7.68	Homo Sapiens	0.000208509	0.000945445	0	0.000956018	0.0010269	0	0	0	0	0	0	0	0	0	0	0	0	0	0	0	0	0	0	0	0	0.000158559	0	0.000147671	0.000370521	0
272	F-actin-capping protein subunit beta OS=Homo sapiens GN=CAPZB PE=1 SV=4	CAPZB_HUMAN	31	5.23	Homo Sapiens	0	0.000280729	0	0.00189807	0.00165078	0	0	0	0	0	0.000926092	0	0	0	0	0	0	0	0	0	0	0	0	0	0	0.000312003	0	0	0.00102478	0
273	Keratin, type II cytoskeletal 6A OS=Homo sapiens GN=KRT6A PE=1 SV=3	K2C6A_HUMAN	60	8.16	Homo Sapiens	0	0	0	0.00713837	0.0079869	0	0.00453169	0.00677407	0.0052747	0.00692154	0	0.00288863	0	0	0.00121167	0	0	0	0.000417236	0.000374903	0	0	0	0	0.000340056	0	0	0	0	0
274	Ig lambda chain V-III region SH OS=Homo sapiens PE=1 SV=1	LV301_HUMAN	11	6.5	Homo Sapiens	0	0	0	0	0	0	0.00183285	0.00085565	0	0	0	0	0	0	0	0.0023293	0	0.00181177	0	0	0	0	0	0	0	0.00261382	0.00373421	0.000833102	0	0
275	Ig lambda chain V-IV region Hil OS=Homo sapiens PE=1 SV=1	LV403_HUMAN	12	6.45	Homo Sapiens	0	0	0	0.000528293	0.000623982	0	0	0	0	0	0	0	0	0	0	0	0	0	0.00165701	0.000793537	0	0	0	0	0	0	0	0.00150132	0	0
276	Pigment epithelium-derived factor OS=Homo sapiens GN=SERPINF1 PE=1 SV=4	PEDF_HUMAN	46	6.33	Homo Sapiens	0	0	0	0.000275476	0	0.000312944	0	0	0	0	0.000533822	0.000303277	0	0	0.00037406	0	0	0.000214244	0	0	0	0	0	0.000403613	0.000576544	0.000210263	0.000182366	0.000700792	0	0.000474805
277	Ig kappa chain V-II region RPMI 6410 OS=Homo sapiens PE=4 SV=1	KV206_HUMAN	15	9.53	Homo Sapiens	0	0	0	0	0	0	0	0	0	0	0	0	0	0	0	0	0	0	0	0	0	0	0	0	0	0.000619139	0.00192373	0.000637362	0.00180186	0
278	Protein S100-A7 OS=Homo sapiens GN=S100A7 PE=1 SV=4	S10A7_HUMAN	11	6.78	Homo Sapiens	0	0.00243581	0	0.00237467	0.00242526	0	0	0	0	0	0.00297097	0.00542047	0	0	0	0	0	0	0	0.000796322	0	0	0	0	0	0	0	0	0	0
279	HLA class I histocompatibility antigen, A-24 alpha chain OS=Homo sapiens GN=HLA-A PE=1 SV=2	1A24_HUMAN	41	6.29	Homo Sapiens	0.000920874	0	0	0.00205973	0.000913144	0	0	0	0	0.000286478	0	0	0	0	0	0	0	0	0	0	0	0	0.00063376	0.000928844	0.000970281	0.000589761	0.00230431	0	0.000539767	0
280	Keratinocyte proline-rich protein OS=Homo sapiens GN=KPRP PE=1 SV=1	KPRP_HUMAN	64	8.29	Homo Sapiens	0	0.000137174	0	0.000495052	0.000120673	0	0	0	0	0	0.000507648	0.000360703	0	0	0	0	0	0	0	0	0	0	0	0	0	0	0	0	0.000563081	0
281	PDZ and LIM domain protein 1 OS=Homo sapiens GN=PDLIM1 PE=1 SV=4	PDLI1_HUMAN	36	7.03	Homo Sapiens	0	0	0	0.00036633	0.00044642	0	0	0	0	0	0	0	0	0	0	0	0	0	0	0	0	0	0	0	0	0.001463	0.00171422	0.00204547	0	0
282	Phosphoglycerate kinase 1 OS=Homo sapiens GN=PGK1 PE=1 SV=3	PGK1_HUMAN	45	8.27	Homo Sapiens	0	0.000195092	0	0	0	0	0	0	0.000527062	0.000179465	0.000633836	0.000197513	0.000287344	0.00118193	0.000628854	0	0	0	0	0	0	0	0	0	0	0	0	0	0	0
283	Beta-Ala-His dipeptidase OS=Homo sapiens GN=CNDP1 PE=1 SV=4	CNDP1_HUMAN	57	4.95	Homo Sapiens	0	0	0	0	0.000131365	0.00107304	0	0	0	0	0	0	0	0.000147462	0.000385696	0.000540737	0.000249796	0.000176742	0	0	0	0	0	0.0005587	0	0.000502303	0	0	0.000557336	0
284	Actin-related protein 2/3 complex subunit 1B OS=Homo sapiens GN=ARPC1B PE=1 SV=3	ARC1B_HUMAN	41	8.44	Homo Sapiens	0.000914599	0.000657221	0	0.000714504	0.000676413	0	0	0	0	0	0.00110109	0	0	0	0	0	0	0	0.000729213	0.00045171	0	0	0	0.00030189	0.000978616	0.000235904	0.00100218	0.000676402	0	0
285	Transferrin receptor protein 1 OS=Homo sapiens GN=TFRC PE=1 SV=2	TFR1_HUMAN	85	6.58	Homo Sapiens	0	0	0	0	0	0	0	0	0	0	0.00105992	0	0.000615672	0	0	0	0	0.000123626	0	0	0	0	0	0	0	0.000452759	9.65578e-05	0	0.000370047	0
286	Caldesmon OS=Homo sapiens GN=CALD1 PE=1 SV=3	CALD1_HUMAN	93	5.35	Homo Sapiens	0	0	0	0	0	0	0	0	0	0	0	0	0	0	0	0	0	0	0	0	0	0	0	0	0	0.000877555	0.00079692	0.000243828	0.000570301	0
287	Secreted phosphoprotein 24 OS=Homo sapiens GN=SPP2 PE=1 SV=1	SPP24_HUMAN	24	8.46	Homo Sapiens	0	0	0	0	0.000347836	0	0	0	0	0	0	0.00151392	0	0	0	0	0	0	0	0	0	0	0	0	0	0.00138598	0	0.000381838	0.00182144	0
288	Cell division control protein 42 homolog OS=Homo sapiens GN=CDC42 PE=1 SV=2	CDC42_HUMAN	21	6.51	Homo Sapiens	0	0.000414409	0	0.000603424	0	0	0	0.000448401	0	0	0	0	0	0	0	0	0	0.000479728	0	0	0.000610305	0	0	0	0	0.000460575	0	0	0	0
289	Chloride intracellular channel protein 1 OS=Homo sapiens GN=CLIC1 PE=1 SV=4	CLIC1_HUMAN	27	4.82	Homo Sapiens	0.000471076	0.00114647	0	0.000957902	0.000618375	0	0	0	0	0	0.00151803	0	0.000319271	0	0	0	0	0	0	0	0	0	0	0	0	0.0003627	0.000298229	0.000339412	0	0
290	Platelet glycoprotein V OS=Homo sapiens GN=GP5 PE=1 SV=1	GPV_HUMAN	61	10.24	Homo Sapiens	0	0.000291574	0	0.000216311	0	0	0	0	0	0	0	0.000145706	0.000359518	0	0	0	0	0	0	0	0	0	0	0	0	0	0.000538835	0.000532995	0.000864324	0
291	Ficolin-2 OS=Homo sapiens GN=FCN2 PE=1 SV=2	FCN2_HUMAN	34	6.77	Homo Sapiens	0	0	0	0.000775967	0.000916598	0	0	0	0	0	0	0	0	0	0	0	0	0	0	0	0	0	0	0	0	0.00027315	0	0.000397409	0.00142052	0.00256675
292	Galectin-3-binding protein OS=Homo sapiens GN=LGALS3BP PE=1 SV=1	LG3BP_HUMAN	65	4.9	Homo Sapiens	0	0	0	0	0	0	0	0	0	0	0	0	0	0.000662788	0.00115727	0.000161145	0	0	0	0	0	0	0	0	0	0	0.000255327	0	0	0
293	Collectin-11 OS=Homo sapiens GN=COLEC11 PE=1 SV=1	COL11_HUMAN	29	5.06	Homo Sapiens	0	0	0	0	0	0	0	0	0	0	0	0	0	0	0	0	0	0	0	0	0	0	0	0	0	0.00198082	0.00213067	0.00223273	0.000963086	0.00200674
294	14-3-3 protein beta/alpha OS=Homo sapiens GN=YWHAB PE=1 SV=3	1433B_HUMAN	28	4.47	Homo Sapiens	0	0.00158944	0	0.00105571	0.000413736	0	0	0	0	0	0.00159936	0	0	0	0	0	0	0	0	0	0	0	0	0	0	0.000518147	0	0	0	0
295	Tyrosine-protein kinase Lyn OS=Homo sapiens GN=LYN PE=1 SV=3	LYN_HUMAN	59	7.13	Homo Sapiens	0	0.000301458	0	0.000384698	0.000462759	0	0.000168514	0.0001596	0.000131488	0.000273517	0.000275418	0	0.000295501	0	0	0	0	0	0.000340461	0.0003139	0	0	0	0	0	0	0	0.000155324	0	0
296	Annexin A2 OS=Homo sapiens GN=ANXA2 PE=1 SV=2	ANXA2_HUMAN	39	7.91	Homo Sapiens	0	0.000910167	0	0.00075776	0.000198028	0	0	0	0	0	0.00136099	0.000936927	0.00100553	0	0	0	0	0	0.000509848	0.000244165	0	0	0	0	0	0.000499102	0	0	0	0
297	BPI fold-containing family B member 1 OS=Homo sapiens GN=BPIFB1 PE=1 SV=1	BPIB1_HUMAN	52	7.26	Homo Sapiens	0	0	0	0.000507227	0.00058277	0	0	0	0	0	0	0	0	0	0	0	0	0	0	0	0	0	0	0	0	0.000829386	0	0.000708048	0	0
298	EMILIN-1 OS=Homo sapiens GN=EMILIN1 PE=1 SV=2	EMIL1_HUMAN	107	4.81	Homo Sapiens	0.000404359	0.000329606	0.000112627	0.000401855	0.000366354	0	0	0	0	0	0	0	0	0	0	0	0	0	0	0	0	0	0	0	0	0	7.67048e-05	0	0.000128501	0
299	Keratin, type I cuticular Ha2 OS=Homo sapiens GN=KRT32 PE=2 SV=3	K1H2_HUMAN	50	4.49	Homo Sapiens	0	0	0	0.000506876	0.000608434	0	0	0	0	0	0	0.00337666	0	0	0	0	0	0	0	0.000175191	0	0.002007	0	0	0	0	0	0	0	0
300	Corticosteroid-binding globulin OS=Homo sapiens GN=SERPINA6 PE=1 SV=1	CBG_HUMAN	45	5.95	Homo Sapiens	0	0	0	0.00064518	0.000699485	0	0	0	0	0	0	0	0	0.00047868	0.000955696	0	0	0.00045252	0	0	0	0	0	0	0	0	0	0	0.000315109	0.00118713
301	Keratin, type II cytoskeletal 73 OS=Homo sapiens GN=KRT73 PE=1 SV=1	K2C73_HUMAN	59	7.26	Homo Sapiens	0	0.000520798	0.00138429	0	0	0	0	0	0.000135931	0	0.000470641	0	0.000373485	0	0	0	0	0	0	0	0	0	0	0	0	0	0	0	0.000225055	0
302	Complement factor H-related protein 2 OS=Homo sapiens GN=CFHR2 PE=1 SV=1	FHR2_HUMAN	31	6.34	Homo Sapiens	0	0	0.000822285	0.00148976	0.00264221	0	0	0	0	0	0.00115166	0.00290285	0.00252666	0	0	0	0	0	0	0	0	0	0	0.000416612	0	0	0	0	0	0
303	Keratin, type II cytoskeletal 6B OS=Homo sapiens GN=KRT6B PE=1 SV=5	K2C6B_HUMAN	60	8.16	Homo Sapiens	0	0	0.00310372	0.00237732	0.00575882	0	0	0	0	0	0.0035301	0.00552033	0	0	0	0	0	0	0	0	0	0	0.0054781	0.00377451	0.00087913	0	0	0	0	0
304	CD59 glycoprotein OS=Homo sapiens GN=CD59 PE=1 SV=1	CD59_HUMAN	14	6.47	Homo Sapiens	0	0	0	0.000489678	0	0	0.00106525	0.00303386	0.00112698	0.00227131	0	0	0	0	0	0	0	0	0	0	0	0	0	0	0	0	0.00263442	0	0	0
305	Retinol dehydrogenase 11 OS=Homo sapiens GN=RDH11 PE=1 SV=2	RDH11_HUMAN	35	9.06	Homo Sapiens	0	0.00126283	0	0.000836787	0.00146884	0	0	0	0.000229141	0.00124411	0	0	0	0	0	0	0	0	0	0	0	0	0	0	0	0	0.000943922	0.000257369	0.000772225	0
306	Endonuclease domain-containing 1 protein OS=Homo sapiens GN=ENDOD1 PE=1 SV=2	ENDD1_HUMAN	55	5.38	Homo Sapiens	0.000452969	0	0	0.000767784	0.000786478	0	0	0	0.000141051	0	0	0	0	0	0	0	0	0	0	0	0	0	0	0	0	0	0.000522766	0.00016662	0.000160949	0
307	Azurocidin OS=Homo sapiens GN=AZU1 PE=1 SV=3	CAP7_HUMAN	27	9.65	Homo Sapiens	0	0	0	0	0	0	0.000736466	0.00227638	0.00131618	0.00178423	0.000307634	0	0	0.00147741	0.00159092	0.00038168	0	0.00112732	0	0	0	0	0	0	0	0	0	0	0	0
308	Integrin alpha-2 OS=Homo sapiens GN=ITGA2 PE=1 SV=1	ITA2_HUMAN	129	4.95	Homo Sapiens	0	6.7462e-05	0	0.000353866	0.000543635	0	0	0	0.000368027	0.000218892	6.15013e-05	0	0	0	0	0	0	0	0	0	0	0	0	0	0	0	6.242e-05	7.10397e-05	0	0
309	Keratin, type II cuticular Hb2 OS=Homo sapiens GN=KRT82 PE=3 SV=3	KRT82_HUMAN	57	6.72	Homo Sapiens	0	0	0	0	0	0	0	0	0	0.000137376	0	0.00151385	0	0	0	0	0	0	0.0004349	0.000478591	0	0.00363758	0	0	0	0	0	0	0	0
310	Keratin, type II cuticular Hb5 OS=Homo sapiens GN=KRT85 PE=1 SV=1	KRT85_HUMAN	56	6.49	Homo Sapiens	0	0	0	0	0	0	0	0	0.000987224	0.000720425	0	0.00227423	0	0	0	0	0	0	0	0	0	0.00897424	0	0	0	0	0	0	0	0
311	Hemoglobin subunit delta OS=Homo sapiens GN=HBD PE=1 SV=2	HBD_HUMAN	16	8.26	Homo Sapiens	0	0	0	0	0	0	0	0	0	0.0004894	0.0109911	0.0099658	0.0122549	0	0	0	0	0	0	0.000562355	0	0	0	0	0	0	0	0	0	0
312	Coronin-1A OS=Homo sapiens GN=CORO1A PE=1 SV=4	COR1A_HUMAN	51	6.67	Homo Sapiens	0	0	0	0.000320668	0.000617193	0	0	0	0	0.000230306	0.000962972	0.000174276	0.000512624	0	0	0	0	0	0	0	0	0	0	0	0	0	0	0	0	0
313	Ras-related protein Rab-10 OS=Homo sapiens GN=RAB10 PE=1 SV=1	RAB10_HUMAN	23	8.61	Homo Sapiens	0	0.00192336	0	0	0	0	0	0	0	0.000680905	0.00105912	0.000579658	0	0	0	0	0	0	0	0	0	0	0	0.0010763	0.00345926	0	0.00107167	0.000391649	0	0
314	Ig lambda chain V region 4A OS=Homo sapiens PE=4 SV=1	LV001_HUMAN	12	7.12	Homo Sapiens	0	0	0	0.0005277	0	0	0	0	0.00163899	0.00168069	0.000661139	0	0	0	0	0.00173165	0	0	0	0	0	0	0	0	0	0	0.000683951	0	0	0
315	Transforming growth factor beta-1 OS=Homo sapiens GN=TGFB1 PE=1 SV=2	TGFB1_HUMAN	44	8.63	Homo Sapiens	0	0.000197786	0.000273888	0.000737747	0.00106108	0	0	0	0	0.00044491	0.000652586	0.000207596	0.000594178	0	0	0	0	0	0	0	0	0	0	0	0	0	0.000186532	0	0	0
316	Myosin regulatory light polypeptide 9 OS=Homo sapiens GN=MYL9 PE=1 SV=4	MYL9_HUMAN	20	4.54	Homo Sapiens	0.000629264	0.00286648	0.000602554	0.00554125	0.00380271	0	0	0	0.000397004	0.000783041	0	0	0	0	0	0	0	0	0	0	0	0	0	0	0	0.000696532	0	0	0.000442609	0
317	HLA class I histocompatibility antigen, B-35 alpha chain OS=Homo sapiens GN=HLA-B PE=1 SV=1	1B35_HUMAN	40	6.43	Homo Sapiens	0	0	0	0	0	0	0	0.000588527	0	0.00019576	0	0	0	0	0	0	0	0	0	0	0	0	0	0	0	0	0.000704566	0	0	0
318	Ig heavy chain V-I region Mot OS=Homo sapiens PE=1 SV=1	HV107_HUMAN	14	6.23	Homo Sapiens	0	0	0	0	0	0.00109087	0	0	0	0	0	0	0	0	0	0	0	0	0.00213983	0.00198603	0	0	0	0	0	0	0	0	0	0
319	Complement factor H-related protein 4 OS=Homo sapiens GN=CFHR4 PE=1 SV=3	FHR4_HUMAN	65	4.58	Homo Sapiens	0	0	0	0	0	0	0.000229681	0.000289736	0	0	0.000255877	0	0.000604811	0.000549036	0.000998279	0	0	0.00047498	0	0	0	0	0	0	0	0	0.000633339	0	0	0
320	Complement factor H-related protein 3 OS=Homo sapiens GN=CFHR3 PE=1 SV=2	FHR3_HUMAN	37	7.59	Homo Sapiens	0	0	0	0	0	0	0	0.000254498	0	0	0.000883127	0	0.00059272	0	0.000187131	0	0	0	0	0	0	0	0	0	0	0	0.000226725	0	0	0
321	Mannan-binding lectin serine protease 1 OS=Homo sapiens GN=MASP1 PE=1 SV=3	MASP1_HUMAN	79	5.18	Homo Sapiens	0	0	0	8.67784e-05	0.000239933	0	0	0	0	0	0	0	0	0	0	0	0	0	0	0	0	0	0.000164457	0	0	0.000670793	0	0.000352564	0.000112053	0
322	ADP-ribosylation factor 1 OS=Homo sapiens GN=ARF1 PE=1 SV=2	ARF1_HUMAN	21	6.8	Homo Sapiens	0	0	0	0.000452822	0.000356561	0	0	0	0.000369419	0	0.000773323	0.000442881	0	0.00166173	0.00201887	0	0	0	0	0	0	0	0	0	0	0	0	0	0	0
323	ADP/ATP translocase 2 OS=Homo sapiens GN=SLC25A5 PE=1 SV=7	ADT2_HUMAN	33	10.18	Homo Sapiens	0	0.000936864	0	0.000991588	0.00105783	0	0	0	0	0	0	0	0	0	0	0	0	0	0	0.000265441	0	0	0	0	0	0	0.000244005	0	0	0
324	Proto-oncogene tyrosine-protein kinase Src OS=Homo sapiens GN=SRC PE=1 SV=3	SRC_HUMAN	60	7.47	Homo Sapiens	0.000203237	0	0	0.000316798	0.000263931	0	0	0	0	0	0	0	0	0	0	0	0	0	0	0	0	0	0	0	0	0	0	0.000309473	0	0
325	Insulin-like growth factor-binding protein complex acid labile subunit OS=Homo sapiens GN=IGFALS PE=1 SV=1	ALS_HUMAN	66	6.78	Homo Sapiens	0	0	0	0.000103871	0.000113451	0	0.000150641	0	0	0	0	0	0.000332282	0	0	0.000156142	0	0.000462804	0	0	0	0	0	0	0	0	0	0	0	0
326	Prolactin-inducible protein OS=Homo sapiens GN=PIP PE=1 SV=1	PIP_HUMAN	17	8.18	Homo Sapiens	0	0.00156266	0	0.00152137	0.00117705	0	0	0	0	0	0.00144446	0.00295303	0	0	0	0	0	0	0	0	0	0	0	0	0	0	0	0	0	0
327	Phosphatidylcholine-sterol acyltransferase OS=Homo sapiens GN=LCAT PE=1 SV=1	LCAT_HUMAN	50	6.04	Homo Sapiens	0	0	0	0.000517338	0.000304217	0	0	0	0.000393132	0.000716726	0	0	0	0.000445767	0.000928336	0.000309161	0	0	0.000200273	0	0	0	0	0	0	0	0	0	0	0
328	Sarcoplasmic/endoplasmic reticulum calcium ATPase 2 OS=Homo sapiens GN=ATP2A2 PE=1 SV=1	AT2A2_HUMAN	115	4.99	Homo Sapiens	0.00037793	0.000272484	0	0.000621814	0.000649182	0	0	0	0	0	0	0	0	0	0	0	0	0	0	0	0	0	0	0	0	0.000126158	0.000250921	0	0	0
329	NADH-cytochrome b5 reductase 3 OS=Homo sapiens GN=CYB5R3 PE=1 SV=3	NB5R3_HUMAN	34	7.68	Homo Sapiens	0	0.000258211	0	0.00106324	0.00126651	0	0	0	0	0	0	0	0	0	0	0	0	0	0	0	0	0	0	0	0	0	0.000843368	0	0.000260358	0
330	Sushi, von Willebrand factor type A, EGF and pentraxin domain-containing protein 1 OS=Homo sapiens GN=SVEP1 PE=1 SV=3	SVEP1_HUMAN	390	5.2	Homo Sapiens	0	3.3766e-05	0	0	0	0	6.44422e-05	0.000108908	0	0	6.29636e-05	0	5.54865e-05	0	0	0	0	0	0	0	0	0	0	0	0	0	0.00011588	0	0	0
331	Phosphatidylinositide phosphatase SAC1 OS=Homo sapiens GN=SACM1L PE=1 SV=2	SAC1_HUMAN	67	7.13	Homo Sapiens	0	0.000131032	0	0.000720827	0.000767306	0	0	0	0	0	0	0	0	0	0	0	0	0	0	0	0	0	0	0	0	0	0.000120182	0	0.000136812	0
332	EH domain-containing protein 3 OS=Homo sapiens GN=EHD3 PE=1 SV=2	EHD3_HUMAN	61	6.53	Homo Sapiens	0.000408414	0	0	0.000415473	0.00012275	0	0	0	0	0	0.000266226	0	0	0	0	0	0	0	0	0	0.000199197	0	0	0	0	0	0	0	0	0
333	Carnitine O-palmitoyltransferase 1, liver isoform OS=Homo sapiens GN=CPT1A PE=1 SV=2	CPT1A_HUMAN	88	8.84	Homo Sapiens	0.000497627	0.000297984	0	0.000143999	0.000179953	0	0	0	0	0	0	0	0	0	0	0	0	0	0	0	0	0	0	0	0	0.00010991	0.000420144	0.000206501	0.000156245	0
334	Elongation factor 1-alpha 1 OS=Homo sapiens GN=EEF1A1 PE=1 SV=1	EF1A1_HUMAN	50	9.5	Homo Sapiens	0	0.000437427	0	0	0.000154462	0	0	0	0.000240598	0.000484126	0.000324994	0.000182685	0.000521098	0	0.000138477	0	0	0	0	0	0	0.000499063	0	0	0	0	0	0	0	0
335	Actin-related protein 2 OS=Homo sapiens GN=ACTR2 PE=1 SV=1	ARP2_HUMAN	45	6.72	Homo Sapiens	0	0	0	0.000797446	0.000782683	0	0	0	0	0	0.000541326	0	0	0	0	0	0	0	0	0.000199948	0	0	0	0	0	0	0.000728405	0	0.000203698	0
336	Keratin, type II cytoskeletal 80 OS=Homo sapiens GN=KRT80 PE=1 SV=2	K2C80_HUMAN	51	5.36	Homo Sapiens	0	0	0	0.00120569	0.00108144	0	0	0	0	0	0.00104085	0.00107148	0	0	0	0	0	0	0	0	0	0	0	0	0	0	0	0	0	0
337	Annexin A1 OS=Homo sapiens GN=ANXA1 PE=1 SV=2	ANXA1_HUMAN	39	7.04	Homo Sapiens	0	0	0	0	0.000585033	0	0.000393039	0.000728273	0	0	0.000736505	0	0	0	0	0	0	0	0	0	0	0	0	0.000319831	0	0	0	0	0	0
338	Guanine nucleotide-binding protein G(q) subunit alpha OS=Homo sapiens GN=GNAQ PE=1 SV=4	GNAQ_HUMAN	42	5.37	Homo Sapiens	0	0.000423477	0	0.000691095	0.000831148	0	0	0	0	0	0	0	0	0	0	0	0	0	0	0	0	0	0	0	0	0	0	0	0.000337616	0
339	Syntaxin-binding protein 2 OS=Homo sapiens GN=STXBP2 PE=1 SV=2	STXB2_HUMAN	66	6.52	Homo Sapiens	0.000375447	0.000197786	0	0.000347805	0.000230468	0	0	0	0	0	0	0	0	0	0	0	0	0	0	0	0	0	0	0	0.000401834	0	0	0	0	0
340	14-3-3 protein theta OS=Homo sapiens GN=YWHAQ PE=1 SV=1	1433T_HUMAN	28	4.41	Homo Sapiens	0	0	0	0.000905137	0	0	0	0	0	0	0	0	0	0	0	0	0	0	0	0	0	0	0	0	0	0.000349746	0.00117065	0	0	0
[truncated: 220 more rows]
[truncated: 19 more columns]

## Sheet: pI average LCMS
						CHOL_CTRL					CHOL_Glioblastoma					CHOL_Lung					CHOL_Meningioma					CHOL_Mieloma					CHOL_Pancreas
[truncated: 562 more rows]
[truncated: 19 more columns]

## Sheet: Top25
						CHOL_CTRL					CHOL_Glioblastoma					CHOL_Lung					CHOL_Meningioma					CHOL_Mieloma					CHOL_Pancreas
[truncated: 562 more rows]
[truncated: 49 more columns]

[truncated: 1 more sheets: Category]
