# Supplementary material for: Disease-specific protein corona sensor arrays may have disease detection capacity
Source: Royal Society of Chemistry journal article supplement (doi:10.1039/c9nh00097f), 2019-01-01
Supplement: c9nh00097f3.xlsx [file c9nh00097f3.xlsx]

## Sheet: Samples Report of DOTAP 5 indiv
#DOTAP, Samples Report created on 01/07/2016						DOTAP_CTRL
						Spectral counts															Percent coverage															Unique peptide
#	Identified Proteins (524)	Accession Number	Molecular Weight /kDa	pI	Taxonomy	2016-02-23_DOTAP_DOPE_CTRL_A_01_160223142213	2016-02-29_DOTAP_DOPE_CTRL_A_02	2016-02-29_DOTAP_DOPE_CTRL_A_03	2016-02-29_DOTAP_DOPE_CTRL_B_01	2016-02-29_DOTAP_DOPE_CTRL_B_02	2016-02-29_DOTAP_DOPE_CTRL_B_03	2016-02-29_DOTAP_DOPE_CTRL_C_01	2016-02-29_DOTAP_DOPE_CTRL_C_02	2016-02-29_DOTAP_DOPE_CTRL_C_03	2016-06-17_DOTAP_DOPE_CTRL_D_01	2016-06-17_DOTAP_DOPE_CTRL_D_02	2016-06-17_DOTAP_DOPE_CTRL_D_03	2016-06-17_DOTAP_DOPE_CTRL_E_01	2016-06-17_DOTAP_DOPE_CTRL_E_02	2016-06-17_DOTAP_DOPE_CTRL_E_03	2016-02-23_DOTAP_DOPE_CTRL_A_01_160223142213	2016-02-29_DOTAP_DOPE_CTRL_A_02	2016-02-29_DOTAP_DOPE_CTRL_A_03	2016-02-29_DOTAP_DOPE_CTRL_B_01	2016-02-29_DOTAP_DOPE_CTRL_B_02	2016-02-29_DOTAP_DOPE_CTRL_B_03	2016-02-29_DOTAP_DOPE_CTRL_C_01	2016-02-29_DOTAP_DOPE_CTRL_C_02	2016-02-29_DOTAP_DOPE_CTRL_C_03	2016-06-17_DOTAP_DOPE_CTRL_D_01	2016-06-17_DOTAP_DOPE_CTRL_D_02	2016-06-17_DOTAP_DOPE_CTRL_D_03	2016-06-17_DOTAP_DOPE_CTRL_E_01	2016-06-17_DOTAP_DOPE_CTRL_E_02	2016-06-17_DOTAP_DOPE_CTRL_E_03	2016-02-23_DOTAP_DOPE_CTRL_A_01_160223142213	2016-02-29_DOTAP_DOPE_CTRL_A_02	2016-02-29_DOTAP_DOPE_CTRL_A_03	2016-02-29_DOTAP_DOPE_CTRL_B_01	2016-02-29_DOTAP_DOPE_CTRL_B_02	2016-02-29_DOTAP_DOPE_CTRL_B_03	2016-02-29_DOTAP_DOPE_CTRL_C_01	2016-02-29_DOTAP_DOPE_CTRL_C_02	2016-02-29_DOTAP_DOPE_CTRL_C_03	2016-06-17_DOTAP_DOPE_CTRL_D_01	2016-06-17_DOTAP_DOPE_CTRL_D_02	2016-06-17_DOTAP_DOPE_CTRL_D_03	2016-06-17_DOTAP_DOPE_CTRL_E_01	2016-06-17_DOTAP_DOPE_CTRL_E_02
1	Apolipoprotein B-100 OS=Homo sapiens GN=APOB PE=1 SV=2	APOB_HUMAN	516	7.04	Homo sapiens	53	47	45	71	50	73	56	61	60	707	782	780	757	853	854	0.13	0.13	0.11	0.18	0.12	0.19	0.15	0.15	0.16	0.68	0.68	0.69	0.67	0.72	0.71	52	47	44	67	47	72	54	59	60	446	465	461	448	510
2	Serum albumin OS=Homo sapiens GN=ALB PE=1 SV=2	ALBU_HUMAN	69	6.21	Homo sapiens	170	142	150	138	117	138	192	196	197	313	344	392	402	297	305	0.89	0.85	0.83	0.82	0.77	0.82	0.85	0.85	0.86	0.81	0.81	0.82	0.81	0.81	0.81	119	106	104	94	81	96	127	127	130	111	112	120	119	115
3	Vitronectin OS=Homo sapiens GN=VTN PE=1 SV=1	VTNC_HUMAN	54	5.54	Homo sapiens	240	157	163	175	148	172	202	235	229	298	306	354	327	300	300	0.38	0.38	0.38	0.38	0.37	0.44	0.38	0.38	0.38	0.54	0.52	0.54	0.52	0.55	0.54	46	46	44	43	36	42	43	48	47	43	43	45	42	45
4	Prothrombin OS=Homo sapiens GN=F2 PE=1 SV=2	THRB_HUMAN	70	5.7	Homo sapiens	384	343	361	403	368	384	353	405	398	154	163	166	171	147	152	0.65	0.65	0.66	0.64	0.63	0.63	0.66	0.65	0.66	0.57	0.59	0.59	0.59	0.59	0.61	110	105	104	106	96	108	113	116	113	84	82	83	87	74
5	Complement C4-A OS=Homo sapiens GN=C4A PE=1 SV=2	CO4A_HUMAN	193	7.08	Homo sapiens	453	316	328	418	351	431	415	455	468	89	89	85	83	76	75	0.69	0.63	0.67	0.68	0.57	0.69	0.69	0.69	0.68	0.47	0.49	0.46	0.44	0.43	0.41	181	163	170	166	126	171	186	192	193	75	76	73	66	64
6	Complement C3 OS=Homo sapiens GN=C3 PE=1 SV=2	CO3_HUMAN	187	6.34	Homo sapiens	69	63	60	79	66	87	72	73	74	190	193	201	190	233	231	0.34	0.28	0.33	0.4	0.31	0.43	0.33	0.34	0.34	0.7	0.69	0.74	0.66	0.75	0.72	61	56	53	70	56	75	64	65	67	127	129	134	125	155
7	C4b-binding protein alpha chain OS=Homo sapiens GN=C4BPA PE=1 SV=2	C4BPA_HUMAN	67	7.31	Homo sapiens	329	288	327	308	279	320	292	324	330	150	176	182	177	135	147	0.78	0.78	0.8	0.79	0.63	0.73	0.8	0.8	0.79	0.68	0.7	0.71	0.66	0.65	0.66	107	99	104	83	76	82	104	103	109	56	60	65	59	52
8	Clusterin OS=Homo sapiens GN=CLU PE=1 SV=1	CLUS_HUMAN	52	6.21	Homo sapiens	192	175	198	178	156	178	178	201	194	54	54	60	55	50	48	0.48	0.46	0.47	0.42	0.43	0.45	0.48	0.5	0.49	0.33	0.35	0.38	0.37	0.37	0.37	50	49	50	46	41	48	51	53	48	32	31	35	32	31
9	Fibrinogen beta chain OS=Homo sapiens GN=FGB PE=1 SV=2	FIBB_HUMAN	56	8.38	Homo sapiens	68	69	66	53	44	59	65	66	63	57	60	62	61	93	90	0.67	0.63	0.66	0.67	0.6	0.61	0.73	0.73	0.66	0.61	0.68	0.68	0.63	0.69	0.71	48	47	44	40	30	38	47	49	47	39	38	39	39	54
10	Fibrinogen alpha chain OS=Homo sapiens GN=FGA PE=1 SV=2	FIBA_HUMAN	95	5.87	Homo sapiens	69	57	56	46	40	42	56	63	59	47	51	46	50	68	76	0.47	0.42	0.41	0.35	0.36	0.33	0.45	0.4	0.4	0.35	0.32	0.3	0.34	0.41	0.4	62	52	48	43	38	38	51	54	54	41	43	40	43	52
11	Inter-alpha-trypsin inhibitor heavy chain H2 OS=Homo sapiens GN=ITIH2 PE=1 SV=2	ITIH2_HUMAN	106	6.85	Homo sapiens	69	59	65	78	69	80	54	64	75	41	43	46	44	47	47	0.4	0.43	0.45	0.47	0.45	0.45	0.43	0.42	0.43	0.38	0.38	0.39	0.36	0.38	0.38	54	45	52	55	50	58	47	53	59	36	36	38	36	40
12	Inter-alpha-trypsin inhibitor heavy chain H1 OS=Homo sapiens GN=ITIH1 PE=1 SV=3	ITIH1_HUMAN	101	6.78	Homo sapiens	56	47	47	54	46	69	57	54	58	30	37	34	35	30	33	0.36	0.33	0.34	0.38	0.35	0.44	0.38	0.37	0.37	0.33	0.32	0.35	0.29	0.34	0.29	44	36	36	38	35	49	46	45	49	26	27	29	29	27
13	Apolipoprotein A-I OS=Homo sapiens GN=APOA1 PE=1 SV=1	APOA1_HUMAN	31	5.5	Homo sapiens	35	29	29	25	30	31	33	28	36	69	68	76	79	81	73	0.73	0.6	0.67	0.57	0.65	0.7	0.61	0.61	0.67	0.76	0.74	0.74	0.8	0.78	0.76	30	24	27	25	26	29	30	27	32	46	41	45	49	53
14	Apolipoprotein A-IV OS=Homo sapiens GN=APOA4 PE=1 SV=3	APOA4_HUMAN	45	5.05	Homo sapiens	159	150	146	165	155	164	127	132	132	49	47	46	46	43	42	0.79	0.87	0.86	0.81	0.77	0.84	0.85	0.79	0.86	0.62	0.61	0.67	0.59	0.6	0.67	95	88	91	84	77	76	84	84	82	39	37	36	36	32
15	Fibronectin OS=Homo sapiens GN=FN1 PE=1 SV=4	FINC_HUMAN	263	5.45	Homo sapiens	18	14	18	9	11	12	17	18	16	47	49	52	49	64	73	0.085	0.077	0.11	0.043	0.057	0.07	0.1	0.11	0.095	0.21	0.25	0.24	0.24	0.32	0.32	18	13	18	9	11	12	17	18	16	40	42	45	43	56
16	Hyaluronan-binding protein 2 OS=Homo sapiens GN=HABP2 PE=1 SV=1	HABP2_HUMAN	63	6.52	Homo sapiens	63	46	53	59	51	69	52	67	65	118	126	123	125	120	100	0.54	0.63	0.51	0.58	0.45	0.57	0.52	0.54	0.58	0.61	0.62	0.54	0.61	0.62	0.62	42	32	35	41	33	41	35	45	46	43	44	44	46	47
17	Alpha-1-antitrypsin OS=Homo sapiens GN=SERPINA1 PE=1 SV=3	A1AT_HUMAN	47	5.31	Homo sapiens	56	48	48	52	49	55	48	46	44	46	50	53	49	46	47	0.63	0.63	0.57	0.66	0.61	0.66	0.63	0.57	0.64	0.61	0.63	0.61	0.63	0.61	0.64	46	40	38	40	39	38	39	38	38	37	40	41	35	37
18	Apolipoprotein E OS=Homo sapiens GN=APOE PE=1 SV=1	APOE_HUMAN	36	5.42	Homo sapiens	81	69	75	85	69	82	69	72	72	62	69	72	69	73	74	0.83	0.82	0.81	0.78	0.72	0.79	0.77	0.82	0.83	0.72	0.75	0.78	0.74	0.75	0.74	50	49	46	47	42	46	47	49	47	42	46	43	44	45
19	Fibrinogen gamma chain OS=Homo sapiens GN=FGG PE=1 SV=3	FIBG_HUMAN	52	5.32	Homo sapiens	37	32	32	30	32	38	36	34	39	39	42	40	40	63	69	0.52	0.49	0.48	0.47	0.51	0.5	0.54	0.53	0.53	0.59	0.53	0.53	0.52	0.62	0.61	29	27	26	25	25	30	31	29	31	30	28	30	32	43
20	Apolipoprotein C-III OS=Homo sapiens GN=APOC3 PE=1 SV=1	APOC3_HUMAN	11	5.04	Homo sapiens	40	43	36	39	24	34	39	41	40	113	146	156	141	130	133	0.63	0.63	0.77	0.59	0.59	0.73	0.63	0.63	0.77	0.63	0.63	0.77	0.63	0.77	0.75	14	15	12	13	10	15	15	14	11	18	16	16	17	15
21	Inter-alpha-trypsin inhibitor heavy chain H3 OS=Homo sapiens GN=ITIH3 PE=1 SV=2	ITIH3_HUMAN	100	5.49	Homo sapiens	63	53	50	52	49	76	59	60	52	27	27	25	25	26	27	0.44	0.31	0.34	0.4	0.35	0.4	0.37	0.39	0.34	0.35	0.31	0.27	0.26	0.26	0.26	47	44	44	42	36	47	48	49	40	23	22	21	22	22
22	Protein AMBP OS=Homo sapiens GN=AMBP PE=1 SV=1	AMBP_HUMAN	39	6.15	Homo sapiens	85	58	62	57	60	63	71	78	79	17	18	22	16	16	21	0.47	0.34	0.28	0.36	0.36	0.46	0.32	0.34	0.34	0.45	0.41	0.45	0.41	0.44	0.45	31	21	22	19	22	22	24	25	27	16	16	18	14	15
23	Keratin, type II cytoskeletal 1 OS=Homo sapiens GN=KRT1 PE=1 SV=6	K2C1_HUMAN	66	8.33	Homo sapiens	36	30	30	47	42	49	38	41	46	43	43	38	41	53	51	0.42	0.45	0.49	0.58	0.46	0.51	0.44	0.47	0.49	0.56	0.54	0.46	0.5	0.58	0.58	33	29	29	42	37	42	33	36	39	37	36	31	36	45
24	Alpha-2-macroglobulin OS=Homo sapiens GN=A2M PE=1 SV=3	A2MG_HUMAN	163	6.43	Homo sapiens	31	21	20	25	17	29	34	34	35	67	64	56	56	51	52	0.23	0.15	0.19	0.18	0.12	0.2	0.28	0.28	0.25	0.4	0.39	0.37	0.35	0.36	0.37	30	20	19	25	16	28	32	32	33	55	54	50	46	44
25	Vitamin K-dependent protein S OS=Homo sapiens GN=PROS1 PE=1 SV=1	PROS_HUMAN	75	5.37	Homo sapiens	92	81	77	92	94	106	88	92	92	52	58	57	54	48	45	0.45	0.44	0.44	0.49	0.39	0.51	0.51	0.52	0.46	0.49	0.5	0.48	0.46	0.43	0.46	56	49	49	53	46	53	55	55	54	33	36	38	33	33
26	Serotransferrin OS=Homo sapiens GN=TF PE=1 SV=3	TRFE_HUMAN	77	7.13	Homo sapiens	40	34	33	19	21	25	52	50	50	73	76	69	70	65	70	0.48	0.41	0.44	0.29	0.29	0.33	0.53	0.52	0.51	0.62	0.67	0.67	0.65	0.65	0.66	32	27	28	18	20	22	45	43	41	60	62	59	59	52
27	Talin-1 OS=Homo sapiens GN=TLN1 PE=1 SV=3	TLN1_HUMAN	270	5.94	Homo sapiens	70	54	56	22	18	25	60	58	56	0	0	0	0	0	0	0.29	0.27	0.28	0.12	0.095	0.14	0.27	0.26	0.25	0	0	0	0	0	0	66	51	54	22	18	25	59	57	55	0	0	0	0	0
28	Myosin-9 OS=Homo sapiens GN=MYH9 PE=1 SV=4	MYH9_HUMAN	227	5.29	Homo sapiens	117	93	93	40	27	42	112	113	107	0	0	0	0	0	0	0.45	0.41	0.45	0.25	0.17	0.26	0.49	0.49	0.47	0	0	0	0	0	0	112	89	91	40	27	42	108	111	103	0	0	0	0	0
29	Apolipoprotein D OS=Homo sapiens GN=APOD PE=1 SV=1	APOD_HUMAN	21	4.79	Homo sapiens	24	30	27	32	27	34	18	20	23	63	64	68	75	66	69	0.44	0.44	0.44	0.48	0.43	0.48	0.44	0.44	0.44	0.57	0.48	0.48	0.62	0.62	0.48	18	21	19	19	17	20	14	15	16	23	23	25	27	24
30	Kininogen-1 OS=Homo sapiens GN=KNG1 PE=1 SV=2	KNG1_HUMAN	72	6.8	Homo sapiens	48	41	39	35	37	39	33	42	45	25	34	31	29	26	24	0.39	0.37	0.34	0.34	0.36	0.32	0.33	0.32	0.34	0.35	0.44	0.41	0.4	0.34	0.32	37	34	31	26	27	31	27	30	31	23	31	29	25	23
31	Filamin-A OS=Homo sapiens GN=FLNA PE=1 SV=4	FLNA_HUMAN	281	5.95	Homo sapiens	69	51	52	22	18	21	51	62	54	0	0	0	0	0	0	0.3	0.21	0.21	0.11	0.091	0.1	0.21	0.25	0.24	0	0	0	0	0	0	65	44	47	22	18	21	44	53	50	0	0	0	0	0
32	Ig gamma-1 chain C region OS=Homo sapiens GN=IGHG1 PE=1 SV=1	IGHG1_HUMAN	36	8.31	Homo sapiens	39	40	40	41	34	37	41	46	44	30	35	29	34	35	32	0.5	0.52	0.45	0.45	0.45	0.52	0.45	0.56	0.52	0.42	0.5	0.46	0.57	0.57	0.48	21	25	26	26	22	25	25	30	25	22	23	20	24	24
33	Apolipoprotein C-II OS=Homo sapiens GN=APOC2 PE=1 SV=1	APOC2_HUMAN	11	4.36	Homo sapiens	20	20	18	28	16	23	20	21	20	111	117	113	110	115	104	0.59	0.59	0.59	0.59	0.54	0.59	0.59	0.59	0.59	0.59	0.59	0.59	0.59	0.59	0.59	11	13	11	11	7	11	13	13	13	12	12	14	15	15
34	Thrombospondin-1 OS=Homo sapiens GN=THBS1 PE=1 SV=2	TSP1_HUMAN	129	4.51	Homo sapiens	40	31	35	24	19	25	39	39	39	7	4	3	5	5	4	0.26	0.28	0.26	0.2	0.18	0.25	0.28	0.27	0.28	0.058	0.031	0.027	0.046	0.038	0.031	39	31	34	22	17	22	38	37	37	7	4	3	5	5
35	Ceruloplasmin OS=Homo sapiens GN=CP PE=1 SV=1	CERU_HUMAN	122	5.5	Homo sapiens	13	13	13	18	15	17	11	13	13	39	49	44	43	42	41	0.15	0.14	0.16	0.16	0.17	0.2	0.13	0.14	0.15	0.37	0.44	0.37	0.39	0.37	0.36	12	12	12	17	15	17	9	12	12	35	45	39	38	37
36	Complement factor H OS=Homo sapiens GN=CFH PE=1 SV=4	CFAH_HUMAN	139	6.59	Homo sapiens	28	23	22	11	11	16	18	24	28	23	25	23	22	19	23	0.29	0.25	0.22	0.1	0.11	0.17	0.17	0.24	0.26	0.21	0.22	0.22	0.19	0.18	0.22	28	23	22	11	11	16	18	23	26	22	24	21	21	18
37	Ig mu chain C region OS=Homo sapiens GN=IGHM PE=1 SV=3	IGHM_HUMAN	49	6.77	Homo sapiens	21	19	18	19	18	23	27	25	28	17	15	13	16	16	18	0.4	0.3	0.31	0.35	0.28	0.38	0.37	0.35	0.45	0.3	0.26	0.28	0.28	0.28	0.28	18	13	14	13	16	18	20	21	25	12	13	12	13	13
38	Apolipoprotein A-II OS=Homo sapiens GN=APOA2 PE=1 SV=1	APOA2_HUMAN	11	6.6	Homo sapiens	13	13	12	16	15	17	12	15	14	32	30	52	45	24	27	0.69	0.69	0.74	0.69	0.69	0.72	0.72	0.74	0.74	0.69	0.69	0.69	0.69	0.69	0.67	10	9	9	11	10	13	9	11	10	17	14	17	16	13
39	Haptoglobin OS=Homo sapiens GN=HP PE=1 SV=1	HPT_HUMAN	45	6.56	Homo sapiens	21	13	9	16	12	16	22	25	21	35	37	36	37	40	40	0.44	0.33	0.27	0.36	0.25	0.31	0.52	0.52	0.41	0.57	0.55	0.51	0.53	0.55	0.55	18	11	8	15	9	13	16	21	17	28	24	24	24	26
40	Keratin, type I cytoskeletal 9 OS=Homo sapiens GN=KRT9 PE=1 SV=3	K1C9_HUMAN	62	4.89	Homo sapiens	13	16	14	22	23	26	16	17	14	31	29	23	28	32	35	0.22	0.3	0.29	0.37	0.36	0.37	0.34	0.34	0.31	0.51	0.51	0.42	0.5	0.53	0.62	12	15	14	19	18	23	15	16	14	26	26	20	24	27
41	Apolipoprotein(a) OS=Homo sapiens GN=LPA PE=1 SV=1	APOA_HUMAN	501	5.77	Homo sapiens	6	3	4	4	6	8	2	4	3	105	106	101	101	113	109	0.014	0.0095	0.012	0.012	0.016	0.014	0.0068	0.0079	0.0055	0.13	0.13	0.13	0.13	0.14	0.13	6	3	4	4	6	7	2	4	3	66	71	67	65	76
42	Serum amyloid A-1 protein OS=Homo sapiens GN=SAA1 PE=1 SV=1	SAA1_HUMAN	14	6.79	Homo sapiens	8	8	7	9	6	9	7	8	9	12	14	13	18	10	13	0.61	0.7	0.57	0.57	0.45	0.57	0.57	0.7	0.7	0.66	0.66	0.66	0.66	0.66	0.66	8	8	7	9	6	8	7	8	9	11	13	10	13	10
43	Complement component C9 OS=Homo sapiens GN=C9 PE=1 SV=2	CO9_HUMAN	63	5.27	Homo sapiens	15	16	14	15	14	16	13	16	13	15	16	13	13	13	14	0.21	0.22	0.22	0.19	0.24	0.25	0.21	0.21	0.2	0.22	0.26	0.19	0.23	0.25	0.29	14	15	13	14	14	15	10	14	11	12	12	11	11	11
44	Serum paraoxonase/arylesterase 1 OS=Homo sapiens GN=PON1 PE=1 SV=3	PON1_HUMAN	40	4.89	Homo sapiens	33	30	29	32	24	38	33	34	32	25	29	27	27	27	29	0.66	0.63	0.54	0.62	0.51	0.71	0.7	0.63	0.63	0.64	0.68	0.68	0.68	0.68	0.68	28	25	26	27	19	33	27	29	25	21	24	23	23	23
45	Keratin, type I cytoskeletal 10 OS=Homo sapiens GN=KRT10 PE=1 SV=6	K1C10_HUMAN	59	4.88	Homo sapiens	15	12	12	26	25	27	20	23	23	26	24	26	22	27	28	0.28	0.22	0.21	0.43	0.41	0.42	0.37	0.41	0.38	0.35	0.35	0.39	0.33	0.43	0.42	14	12	11	22	20	24	19	19	19	20	19	22	18	21
46	Actin, cytoplasmic 2 OS=Homo sapiens GN=ACTG1 PE=1 SV=1	ACTG_HUMAN	42	5.16	Homo sapiens	35	26	28	12	6	8	38	38	43	4	3	2	3	3	2	0.49	0.48	0.41	0.32	0.17	0.26	0.58	0.55	0.64	0.12	0.088	0.056	0.085	0.088	0.059	24	22	22	11	6	8	28	28	34	4	3	2	3	3
47	Complement C1s subcomponent OS=Homo sapiens GN=C1S PE=1 SV=1	C1S_HUMAN	77	4.59	Homo sapiens	21	11	13	14	15	15	11	17	21	3	4	3	2	3	2	0.31	0.17	0.21	0.19	0.18	0.22	0.25	0.24	0.31	0.049	0.084	0.073	0.038	0.073	0.038	20	9	10	12	13	12	11	16	18	3	4	3	2	3
48	Gelsolin OS=Homo sapiens GN=GSN PE=1 SV=1	GELS_HUMAN	86	6.19	Homo sapiens	35	36	31	29	24	29	44	43	45	18	18	20	20	20	18	0.49	0.48	0.32	0.41	0.25	0.44	0.55	0.52	0.54	0.26	0.25	0.26	0.29	0.27	0.25	32	32	27	25	20	25	39	39	40	17	17	18	20	19
49	Retinol-binding protein 4 OS=Homo sapiens GN=RBP4 PE=1 SV=3	RET4_HUMAN	23	5.85	Homo sapiens	2	2	2	0	0	3	3	2	0	6	5	4	8	4	5	0.18	0.1	0.1	0	0	0.1	0.18	0.1	0	0.24	0.19	0.18	0.29	0.22	0.24	2	2	2	0	0	3	3	2	0	6	5	4	8	4
50	Keratin, type II cytoskeletal 2 epidermal OS=Homo sapiens GN=KRT2 PE=1 SV=2	K22E_HUMAN	65	8.17	Homo sapiens	13	12	18	25	22	23	22	21	19	28	25	24	27	34	32	0.23	0.2	0.33	0.4	0.36	0.33	0.32	0.32	0.28	0.38	0.38	0.36	0.46	0.47	0.47	9	9	15	20	17	17	17	14	12	17	17	16	20	24
51	Ig alpha-1 chain C region OS=Homo sapiens GN=IGHA1 PE=1 SV=2	IGHA1_HUMAN	38	6.49	Homo sapiens	19	18	16	13	11	16	18	21	22	23	19	20	23	21	20	0.45	0.47	0.49	0.44	0.31	0.44	0.45	0.47	0.45	0.56	0.5	0.46	0.57	0.52	0.48	14	15	14	12	10	13	15	15	16	17	12	15	17	15
52	Ig kappa chain C region OS=Homo sapiens GN=IGKC PE=1 SV=1	IGKC_HUMAN	12	5.68	Homo sapiens	18	22	14	14	8	19	20	20	21	17	22	29	27	27	25	0.82	0.89	0.82	0.82	0.67	0.82	0.89	0.87	0.87	0.82	0.82	0.82	0.82	0.89	0.89	10	12	9	8	7	11	13	12	12	12	13	17	15	14
53	Coagulation factor V OS=Homo sapiens GN=F5 PE=1 SV=4	FA5_HUMAN	252	5.95	Homo sapiens	30	22	22	23	23	35	25	32	22	17	23	19	17	13	11	0.15	0.15	0.13	0.12	0.11	0.18	0.15	0.15	0.12	0.099	0.12	0.11	0.093	0.07	0.055	29	22	21	22	23	33	24	30	22	17	23	19	17	13
54	Plasminogen OS=Homo sapiens GN=PLG PE=1 SV=2	PLMN_HUMAN	91	7.25	Homo sapiens	18	15	13	17	18	18	17	18	18	25	32	26	27	17	24	0.26	0.29	0.24	0.26	0.29	0.29	0.28	0.29	0.3	0.38	0.41	0.38	0.35	0.25	0.33	16	14	12	14	15	16	15	16	15	20	23	22	21	13
55	Vitamin D-binding protein OS=Homo sapiens GN=GC PE=1 SV=1	VTDB_HUMAN	53	5.21	Homo sapiens	9	4	3	4	6	4	8	8	6	17	17	17	16	15	15	0.27	0.14	0.084	0.095	0.12	0.1	0.23	0.25	0.17	0.34	0.45	0.43	0.43	0.32	0.36	9	4	3	4	6	4	8	8	6	15	17	16	16	14
56	Complement C5 OS=Homo sapiens GN=C5 PE=1 SV=4	CO5_HUMAN	188	6.49	Homo sapiens	3	2	5	0	4	5	3	2	3	27	28	34	31	41	40	0.024	0.012	0.035	0	0.027	0.038	0.022	0.014	0.024	0.18	0.22	0.26	0.23	0.3	0.28	3	2	5	0	4	5	3	2	3	24	28	34	30	39
57	von Willebrand factor OS=Homo sapiens GN=VWF PE=1 SV=4	VWF_HUMAN	309	5.15	Homo sapiens	20	18	17	2	2	0	17	16	16	8	8	14	8	13	10	0.093	0.091	0.085	0.0085	0.013	0	0.091	0.075	0.077	0.029	0.03	0.047	0.032	0.049	0.037	20	17	17	2	2	0	17	16	16	7	7	12	8	13
58	Coagulation factor IX OS=Homo sapiens GN=F9 PE=1 SV=2	FA9_HUMAN	52	5.16	Homo sapiens	23	20	16	21	14	21	22	23	19	16	22	20	21	18	26	0.32	0.39	0.27	0.34	0.3	0.43	0.33	0.37	0.3	0.35	0.5	0.42	0.44	0.47	0.53	18	17	14	16	13	16	16	19	15	14	18	18	19	17
59	Transthyretin OS=Homo sapiens GN=TTR PE=1 SV=1	TTHY_HUMAN	16	5.58	Homo sapiens	5	4	6	8	2	6	7	4	4	11	13	12	12	11	12	0.5	0.34	0.34	0.53	0.29	0.69	0.38	0.38	0.34	0.69	0.69	0.69	0.69	0.69	0.69	5	4	5	8	2	6	7	4	4	10	11	9	11	9
60	Platelet factor 4 OS=Homo sapiens GN=PF4 PE=1 SV=2	PLF4_HUMAN	11	8.78	Homo sapiens	11	8	11	3	6	3	12	11	11	0	0	0	0	0	0	0.5	0.36	0.53	0.36	0.36	0.36	0.4	0.52	0.51	0	0	0	0	0	0	5	4	8	3	3	3	7	7	6	0	0	0	0	0
61	Inter-alpha-trypsin inhibitor heavy chain H4 OS=Homo sapiens GN=ITIH4 PE=1 SV=4	ITIH4_HUMAN	103	6.97	Homo sapiens	2	2	0	3	3	2	2	2	2	20	20	18	19	22	27	0.02	0.022	0	0.039	0.032	0.024	0.022	0.022	0.024	0.27	0.29	0.31	0.31	0.28	0.37	2	2	0	3	3	2	2	2	2	19	18	18	19	20
62	Apolipoprotein M OS=Homo sapiens GN=APOM PE=1 SV=2	APOM_HUMAN	21	5.92	Homo sapiens	9	10	9	10	10	7	11	12	11	16	11	14	19	19	13	0.22	0.3	0.27	0.39	0.21	0.48	0.23	0.27	0.28	0.52	0.47	0.48	0.62	0.43	0.36	8	9	7	9	6	6	8	9	9	11	9	9	13	12
63	Complement C1r subcomponent OS=Homo sapiens GN=C1R PE=1 SV=2	C1R_HUMAN	80	6.14	Homo sapiens	4	3	3	3	3	4	3	7	5	2	2	2	3	4	4	0.081	0.065	0.058	0.06	0.06	0.079	0.058	0.15	0.13	0.055	0.038	0.038	0.077	0.091	0.052	4	3	3	3	3	4	3	7	5	2	2	2	3	4
64	Ig gamma-3 chain C region OS=Homo sapiens GN=IGHG3 PE=1 SV=2	IGHG3_HUMAN	41	7.95	Homo sapiens	34	25	28	26	25	26	37	31	26	30	29	30	26	29	27	0.41	0.45	0.34	0.42	0.36	0.46	0.47	0.43	0.4	0.46	0.46	0.5	0.46	0.45	0.48	8	6	7	6	5	7	10	9	7	8	9	8	8	6
65	Hemoglobin subunit beta OS=Homo sapiens GN=HBB PE=1 SV=2	HBB_HUMAN	16	7.32	Homo sapiens	7	7	8	49	42	51	7	7	5	11	12	9	8	13	12	0.49	0.43	0.44	0.95	0.95	0.95	0.6	0.6	0.33	0.86	0.87	0.65	0.66	0.88	0.88	7	7	8	27	23	29	7	7	5	11	11	8	8	12
66	Integrin alpha-IIb OS=Homo sapiens GN=ITGA2B PE=1 SV=3	ITA2B_HUMAN	113	5.03	Homo sapiens	19	19	17	4	9	8	17	20	18	3	2	0	0	2	2	0.23	0.26	0.21	0.063	0.12	0.11	0.23	0.26	0.22	0.03	0.018	0	0	0.018	0.018	18	18	17	4	9	8	16	18	17	3	2	0	0	2
67	Serum amyloid A-4 protein OS=Homo sapiens GN=SAA4 PE=1 SV=2	SAA4_HUMAN	15	9.38	Homo sapiens	4	4	4	5	2	2	4	6	4	10	13	15	14	13	15	0.36	0.36	0.36	0.35	0.19	0.19	0.36	0.36	0.25	0.35	0.41	0.47	0.35	0.41	0.44	4	4	4	5	2	2	4	5	4	8	10	12	10	10
68	Heparin cofactor 2 OS=Homo sapiens GN=SERPIND1 PE=1 SV=3	HEP2_HUMAN	57	6.89	Homo sapiens	11	9	9	16	12	14	8	14	12	11	8	9	7	13	11	0.22	0.19	0.19	0.25	0.18	0.23	0.19	0.24	0.19	0.19	0.14	0.15	0.13	0.23	0.19	11	9	9	16	11	12	8	14	11	11	8	9	7	13
69	Integrin beta-3 OS=Homo sapiens GN=ITGB3 PE=1 SV=2	ITB3_HUMAN	87	4.85	Homo sapiens	16	17	12	4	5	6	17	20	19	2	0	0	3	0	2	0.28	0.26	0.2	0.06	0.11	0.1	0.23	0.3	0.24	0.028	0	0	0.039	0	0.028	16	17	12	4	5	6	15	20	19	2	0	0	3	0
70	C4b-binding protein beta chain OS=Homo sapiens GN=C4BPB PE=1 SV=1	C4BPB_HUMAN	28	4.8	Homo sapiens	23	21	22	23	15	26	19	18	19	7	10	10	8	11	11	0.38	0.38	0.38	0.4	0.37	0.41	0.38	0.38	0.38	0.31	0.35	0.26	0.26	0.39	0.35	17	16	17	15	11	17	14	14	14	7	8	8	6	9
71	Vitamin K-dependent protein C OS=Homo sapiens GN=PROC PE=1 SV=1	PROC_HUMAN	52	6.23	Homo sapiens	21	13	15	16	16	22	17	20	17	17	19	18	19	18	21	0.29	0.18	0.23	0.24	0.26	0.24	0.28	0.28	0.28	0.38	0.38	0.4	0.33	0.33	0.33	21	11	14	13	13	16	17	20	16	14	16	16	16	15
72	Hemoglobin subunit alpha OS=Homo sapiens GN=HBA1 PE=1 SV=2	HBA_HUMAN	15	9.09	Homo sapiens	5	8	7	48	31	44	7	8	6	6	8	10	9	8	7	0.56	0.85	0.69	0.92	0.92	0.93	0.77	0.85	0.64	0.51	0.57	0.77	0.76	0.76	0.76	5	8	7	28	17	28	7	8	6	5	7	8	7	8
73	Tropomyosin alpha-4 chain OS=Homo sapiens GN=TPM4 PE=1 SV=3	TPM4_HUMAN	29	4.36	Homo sapiens	23	14	18	16	11	16	23	22	21	0	0	0	0	0	0	0.68	0.43	0.5	0.49	0.36	0.54	0.59	0.63	0.61	0	0	0	0	0	0	21	14	17	16	11	15	21	19	19	0	0	0	0	0
74	Antithrombin-III OS=Homo sapiens GN=SERPINC1 PE=1 SV=1	ANT3_HUMAN	53	6.68	Homo sapiens	0	0	2	0	2	0	3	4	3	10	10	9	9	7	7	0	0	0.043	0	0.073	0	0.097	0.095	0.095	0.25	0.17	0.22	0.19	0.17	0.14	0	0	2	0	2	0	3	4	3	9	9	9	8	7
75	Immunoglobulin lambda-like polypeptide 5 OS=Homo sapiens GN=IGLL5 PE=2 SV=2	IGLL5_HUMAN	23	9.05	Homo sapiens	9	4	7	6	4	6	5	7	9	10	9	10	8	11	11	0.35	0.29	0.29	0.25	0.11	0.2	0.27	0.27	0.44	0.41	0.41	0.37	0.41	0.41	0.44	8	4	6	6	4	5	5	7	8	8	7	8	7	9
76	Complement component C6 OS=Homo sapiens GN=C6 PE=1 SV=3	CO6_HUMAN	105	6.74	Homo sapiens	4	5	4	6	4	5	4	4	4	2	2	0	0	3	2	0.034	0.084	0.081	0.094	0.072	0.089	0.047	0.047	0.034	0.026	0.027	0	0	0.041	0.029	4	5	4	6	4	5	4	4	4	2	2	0	0	3
77	Vitamin K-dependent protein Z OS=Homo sapiens GN=PROZ PE=1 SV=2	PROZ_HUMAN	45	5.87	Homo sapiens	13	6	10	18	11	13	13	10	11	11	12	14	14	17	15	0.26	0.19	0.31	0.43	0.22	0.27	0.27	0.25	0.29	0.32	0.35	0.26	0.41	0.38	0.37	11	6	10	16	11	13	11	8	10	11	12	13	13	15
78	Histidine-rich glycoprotein OS=Homo sapiens GN=HRG PE=1 SV=1	HRG_HUMAN	60	7.52	Homo sapiens	8	4	6	10	6	8	6	3	7	15	18	18	17	15	15	0.19	0.076	0.13	0.24	0.13	0.16	0.11	0.044	0.14	0.32	0.35	0.35	0.32	0.28	0.33	8	4	5	10	6	8	6	3	7	14	15	14	14	11
79	Serum amyloid A-2 protein OS=Homo sapiens GN=SAA2 PE=1 SV=1	SAA2_HUMAN	14	9.48	Homo sapiens	7	0	4	6	0	0	6	7	6	12	13	14	15	13	12	0.45	0	0.4	0.4	0	0	0.4	0.4	0.4	0.48	0.48	0.36	0.48	0.58	0.48	4	0	2	3	0	0	3	4	2	4	4	4	3	5
80	Hornerin OS=Homo sapiens GN=HRNR PE=1 SV=2	HORN_HUMAN	282	10.24	Homo sapiens	6	2	3	3	3	7	4	4	6	9	10	13	11	12	10	0.04	0.017	0.023	0.016	0.019	0.049	0.024	0.03	0.048	0.044	0.049	0.06	0.056	0.059	0.051	6	2	3	3	3	7	4	4	6	9	10	13	11	12
81	Plasma protease C1 inhibitor OS=Homo sapiens GN=SERPING1 PE=1 SV=2	IC1_HUMAN	55	6.52	Homo sapiens	0	0	2	0	3	3	0	0	0	4	3	4	5	4	4	0	0	0.062	0	0.066	0.088	0	0	0	0.1	0.078	0.078	0.098	0.098	0.098	0	0	2	0	3	3	0	0	0	4	3	4	5	4
82	Apolipoprotein C-I OS=Homo sapiens GN=APOC1 PE=1 SV=1	APOC1_HUMAN	9	9.17	Homo sapiens	5	0	0	7	4	5	4	7	5	10	11	10	12	11	10	0.41	0	0	0.4	0.29	0.35	0.29	0.29	0.29	0.29	0.29	0.35	0.29	0.46	0.46	4	0	0	7	3	4	3	4	4	6	7	8	7	8
83	Alpha-actinin-1 OS=Homo sapiens GN=ACTN1 PE=1 SV=2	ACTN1_HUMAN	103	5.07	Homo sapiens	14	6	7	2	0	0	10	16	13	0	0	0	0	0	0	0.18	0.08	0.091	0.029	0	0	0.13	0.23	0.16	0	0	0	0	0	0	14	6	7	2	0	0	10	16	13	0	0	0	0	0
84	Ig lambda-2 chain C regions OS=Homo sapiens GN=IGLC2 PE=1 SV=1	LAC2_HUMAN	11	7.34	Homo sapiens	18	10	0	11	0	0	15	15	15	12	13	15	12	16	14	0.89	0.68	0	0.6	0	0	0.89	0.93	0.89	0.75	0.75	0.75	0.75	0.82	0.82	3	2	0	2	0	0	3	3	3	2	3	2	2	2
85	Cartilage oligomeric matrix protein OS=Homo sapiens GN=COMP PE=1 SV=2	COMP_HUMAN	83	4.16	Homo sapiens	28	21	19	32	23	29	21	22	19	15	18	18	17	18	22	0.34	0.39	0.35	0.5	0.37	0.42	0.29	0.29	0.3	0.23	0.34	0.28	0.29	0.31	0.32	26	20	19	27	22	26	19	20	18	12	15	15	14	17
86	Alpha-1-antichymotrypsin OS=Homo sapiens GN=SERPINA3 PE=1 SV=2	AACT_HUMAN	48	5.19	Homo sapiens	0	0	0	0	0	2	0	0	0	11	12	8	9	8	7	0	0	0	0	0	0.05	0	0	0	0.3	0.32	0.23	0.25	0.22	0.2	0	0	0	0	0	2	0	0	0	10	11	8	9	7
87	Beta-2-glycoprotein 1 OS=Homo sapiens GN=APOH PE=1 SV=3	APOH_HUMAN	38	8.03	Homo sapiens	10	13	13	2	0	6	13	13	17	15	15	15	16	16	15	0.3	0.41	0.32	0.081	0	0.19	0.34	0.43	0.47	0.44	0.44	0.41	0.46	0.41	0.41	10	12	12	2	0	5	12	13	16	14	15	14	15	14
88	C-reactive protein OS=Homo sapiens GN=CRP PE=1 SV=1	CRP_HUMAN	25	5.32	Homo sapiens	4	4	0	2	2	4	4	3	3	6	9	7	6	5	7	0.21	0.18	0	0.098	0.098	0.098	0.21	0.16	0.13	0.26	0.29	0.29	0.21	0.21	0.29	4	4	0	2	2	3	4	3	3	6	9	7	6	5
89	Complement C4-B OS=Homo sapiens GN=C4B PE=1 SV=2	CO4B_HUMAN	193	7.28	Homo sapiens	461	322	332	420	351	430	418	465	474	91	92	86	86	80	78	0.69	0.65	0.67	0.68	0.58	0.69	0.69	0.69	0.68	0.47	0.48	0.45	0.46	0.44	0.41	13	10	10	10	7	9	12	15	13	4	4	4	5	6
90	Coagulation factor X OS=Homo sapiens GN=F10 PE=1 SV=2	FA10_HUMAN	55	5.74	Homo sapiens	14	9	13	14	14	18	12	13	15	7	7	6	9	4	4	0.22	0.22	0.26	0.23	0.19	0.32	0.24	0.27	0.32	0.17	0.2	0.17	0.23	0.11	0.13	12	9	12	12	12	16	11	12	14	6	6	5	8	4
91	Complement factor B OS=Homo sapiens GN=CFB PE=1 SV=2	CFAB_HUMAN	86	7.07	Homo sapiens	3	2	3	2	0	0	3	5	5	13	13	18	12	12	14	0.045	0.033	0.045	0.026	0	0	0.046	0.076	0.072	0.17	0.17	0.23	0.16	0.16	0.17	3	2	3	2	0	0	3	5	5	13	13	16	12	12
92	CD5 antigen-like OS=Homo sapiens GN=CD5L PE=1 SV=1	CD5L_HUMAN	38	5.15	Homo sapiens	9	7	5	7	7	6	7	11	8	6	6	5	7	6	5	0.35	0.34	0.22	0.17	0.17	0.27	0.22	0.37	0.33	0.17	0.17	0.11	0.17	0.11	0.11	9	7	5	7	6	6	7	11	8	6	6	5	6	5
93	Apolipoprotein L1 OS=Homo sapiens GN=APOL1 PE=1 SV=5	APOL1_HUMAN	44	5.55	Homo sapiens	5	3	2	0	3	3	2	4	3	6	6	9	6	9	7	0.15	0.11	0.078	0	0.11	0.11	0.065	0.13	0.085	0.19	0.2	0.24	0.14	0.24	0.21	5	3	2	0	3	3	2	4	3	6	6	9	5	9
94	Keratin, type I cytoskeletal 16 OS=Homo sapiens GN=KRT16 PE=1 SV=4	K1C16_HUMAN	51	4.69	Homo sapiens	6	5	5	12	11	10	26	30	28	11	10	10	11	44	43	0.12	0.11	0.1	0.25	0.19	0.2	0.48	0.5	0.46	0.18	0.18	0.18	0.19	0.6	0.64	3	2	2	7	6	6	19	22	22	6	6	6	7	31
95	Ig gamma-2 chain C region OS=Homo sapiens GN=IGHG2 PE=1 SV=2	IGHG2_HUMAN	36	7.66	Homo sapiens	21	20	18	14	18	17	27	25	27	22	20	22	19	24	18	0.52	0.59	0.52	0.43	0.38	0.43	0.52	0.48	0.54	0.42	0.43	0.41	0.55	0.6	0.37	8	10	9	7	6	7	10	7	9	9	7	7	9	10
96	Mannan-binding lectin serine protease 1 OS=Homo sapiens GN=MASP1 PE=1 SV=3	MASP1_HUMAN	79	5.18	Homo sapiens	15	13	10	12	9	9	8	10	10	15	14	12	13	9	9	0.19	0.17	0.12	0.21	0.14	0.16	0.086	0.099	0.12	0.21	0.22	0.19	0.2	0.15	0.17	13	11	8	11	8	8	6	9	10	12	12	10	12	9
97	Lipopolysaccharide-binding protein OS=Homo sapiens GN=LBP PE=1 SV=3	LBP_HUMAN	53	6.68	Homo sapiens	6	10	10	9	9	11	8	7	11	10	11	12	9	18	19	0.15	0.22	0.22	0.21	0.23	0.22	0.21	0.16	0.21	0.17	0.2	0.2	0.17	0.23	0.25	6	10	10	9	9	11	8	6	10	10	11	12	9	18
98	Alpha-1-acid glycoprotein 1 OS=Homo sapiens GN=ORM1 PE=1 SV=1	A1AG1_HUMAN	24	4.66	Homo sapiens	5	3	3	2	2	3	4	4	5	9	13	10	11	9	10	0.18	0.12	0.12	0.12	0.12	0.12	0.12	0.16	0.17	0.41	0.41	0.41	0.41	0.17	0.17	5	2	3	2	2	2	4	4	5	7	8	8	9	7
99	Glyceraldehyde-3-phosphate dehydrogenase OS=Homo sapiens GN=GAPDH PE=1 SV=3	G3P_HUMAN	36	8.73	Homo sapiens	11	7	7	2	2	3	17	16	11	4	4	2	2	5	5	0.34	0.35	0.33	0.093	0.078	0.093	0.37	0.52	0.44	0.15	0.15	0.066	0.066	0.15	0.12	10	7	7	2	2	2	13	13	10	4	4	2	2	4
100	Vinculin OS=Homo sapiens GN=VCL PE=1 SV=4	VINC_HUMAN	124	5.33	Homo sapiens	14	12	12	3	0	2	12	12	11	0	0	0	0	0	0	0.15	0.14	0.14	0.035	0	0.029	0.13	0.15	0.13	0	0	0	0	0	0	14	12	11	3	0	2	11	12	10	0	0	0	0	0
101	Keratin, type II cytoskeletal 6A OS=Homo sapiens GN=KRT6A PE=1 SV=3	K2C6A_HUMAN	60	8.16	Homo sapiens	0	0	7	14	7	12	37	49	43	9	8	9	7	34	41	0	0	0.15	0.23	0.11	0.21	0.44	0.52	0.5	0.11	0.13	0.14	0.11	0.39	0.42	0	0	3	6	2	6	25	32	30	2	3	3	2	22
102	Erythrocyte band 7 integral membrane protein OS=Homo sapiens GN=STOM PE=1 SV=3	STOM_HUMAN	32	8.07	Homo sapiens	8	9	9	0	2	0	6	8	8	0	2	0	0	0	0	0.21	0.36	0.35	0	0.066	0	0.29	0.27	0.2	0	0.066	0	0	0	0	6	8	7	0	2	0	6	6	7	0	2	0	0	0
103	Alpha-2-HS-glycoprotein OS=Homo sapiens GN=AHSG PE=1 SV=1	FETUA_HUMAN	39	5.52	Homo sapiens	6	6	4	7	6	6	7	8	9	9	9	9	9	11	11	0.22	0.22	0.16	0.23	0.22	0.2	0.22	0.19	0.22	0.3	0.3	0.31	0.31	0.3	0.31	5	6	4	7	6	6	6	7	8	8	8	8	8	8
104	Hemopexin OS=Homo sapiens GN=HPX PE=1 SV=2	HEMO_HUMAN	52	7.02	Homo sapiens	3	2	3	2	0	2	5	5	5	12	11	11	10	8	11	0.11	0.084	0.11	0.08	0	0.08	0.21	0.2	0.19	0.38	0.35	0.3	0.3	0.24	0.3	3	2	3	2	0	2	5	5	4	12	10	11	9	8
105	Lumican OS=Homo sapiens GN=LUM PE=1 SV=2	LUM_HUMAN	38	6.6	Homo sapiens	6	4	4	7	5	9	4	4	4	5	4	4	4	3	3	0.18	0.13	0.13	0.32	0.11	0.29	0.18	0.12	0.13	0.12	0.12	0.089	0.086	0.056	0.086	6	4	4	7	4	9	4	4	4	5	4	4	4	3
106	Protein Z-dependent protease inhibitor OS=Homo sapiens GN=SERPINA10 PE=1 SV=1	ZPI_HUMAN	51	8.58	Homo sapiens	11	11	11	13	7	12	14	11	15	4	4	4	5	3	2	0.24	0.22	0.21	0.22	0.18	0.3	0.29	0.24	0.38	0.11	0.12	0.12	0.14	0.099	0.061	10	9	9	11	7	11	12	11	15	4	4	4	5	3
107	Alpha-1B-glycoprotein OS=Homo sapiens GN=A1BG PE=1 SV=4	A1BG_HUMAN	54	5.71	Homo sapiens	4	0	2	4	2	0	6	2	3	10	10	10	10	9	8	0.061	0	0.063	0.11	0.038	0	0.15	0.063	0.087	0.23	0.24	0.24	0.24	0.23	0.23	3	0	2	4	2	0	6	2	3	9	9	9	10	9
108	Phosphatidylcholine-sterol acyltransferase OS=Homo sapiens GN=LCAT PE=1 SV=1	LCAT_HUMAN	50	6.04	Homo sapiens	3	5	4	6	3	6	5	4	5	17	18	17	15	13	17	0.14	0.2	0.11	0.2	0.12	0.17	0.2	0.17	0.2	0.42	0.44	0.42	0.34	0.34	0.43	3	5	4	5	3	4	5	4	5	14	15	14	13	11
109	Complement component C7 OS=Homo sapiens GN=C7 PE=1 SV=2	CO7_HUMAN	94	6.44	Homo sapiens	2	0	0	0	3	2	2	0	2	0	3	2	0	2	2	0.042	0	0	0	0.051	0.036	0.031	0	0.036	0	0.051	0.036	0	0.036	0.038	2	0	0	0	3	2	2	0	2	0	3	2	0	2
110	Apolipoprotein F OS=Homo sapiens GN=APOF PE=1 SV=2	APOF_HUMAN	35	5.36	Homo sapiens	10	6	6	10	4	8	6	6	6	9	8	8	6	5	5	0.21	0.16	0.16	0.27	0.16	0.27	0.21	0.16	0.21	0.25	0.15	0.25	0.25	0.25	0.15	8	6	6	8	4	8	6	6	6	5	4	5	5	4
111	Haptoglobin-related protein OS=Homo sapiens GN=HPR PE=2 SV=2	HPTR_HUMAN	39	7.11	Homo sapiens	16	12	8	14	8	10	15	18	16	29	26	27	27	30	29	0.43	0.39	0.36	0.41	0.27	0.25	0.48	0.48	0.43	0.53	0.41	0.39	0.41	0.39	0.41	6	6	4	6	4	6	5	6	5	11	8	6	8	10
112	Multimerin-1 OS=Homo sapiens GN=MMRN1 PE=1 SV=3	MMRN1_HUMAN	138	8.01	Homo sapiens	9	10	9	3	0	3	10	9	9	0	0	0	0	0	0	0.1	0.11	0.1	0.029	0	0.031	0.11	0.09	0.072	0	0	0	0	0	0	9	9	9	3	0	3	10	9	8	0	0	0	0	0
113	Beta-Ala-His dipeptidase OS=Homo sapiens GN=CNDP1 PE=1 SV=4	CNDP1_HUMAN	57	4.95	Homo sapiens	0	0	0	0	0	0	0	0	0	12	12	12	10	10	8	0	0	0	0	0	0	0	0	0	0.29	0.31	0.3	0.24	0.21	0.19	0	0	0	0	0	0	0	0	0	12	12	12	10	10
114	Amyloid beta A4 protein OS=Homo sapiens GN=APP PE=1 SV=3	A4_HUMAN	87	4.45	Homo sapiens	0	0	0	0	0	0	0	0	0	0	0	0	0	0	0	0	0	0	0	0	0	0	0	0	0	0	0	0	0	0	0	0	0	0	0	0	0	0	0	0	0	0	0	0
115	Endoplasmin OS=Homo sapiens GN=HSP90B1 PE=1 SV=1	ENPL_HUMAN	92	4.48	Homo sapiens	9	6	4	9	3	6	9	8	8	0	2	2	0	3	2	0.11	0.073	0.081	0.14	0.034	0.1	0.11	0.1	0.11	0	0.029	0.031	0	0.042	0.025	9	6	4	9	3	6	9	8	8	0	2	2	0	3
116	Tubulin beta-4B chain OS=Homo sapiens GN=TUBB4B PE=1 SV=1	TBB4B_HUMAN	50	4.52	Homo sapiens	15	14	11	10	7	11	16	13	17	0	0	0	0	0	0	0.32	0.33	0.27	0.23	0.16	0.27	0.45	0.38	0.4	0	0	0	0	0	0	13	12	10	9	6	10	14	11	15	0	0	0	0	0
117	Complement component C8 alpha chain OS=Homo sapiens GN=C8A PE=1 SV=2	CO8A_HUMAN	65	6.41	Homo sapiens	2	3	2	4	2	5	2	3	5	3	2	3	3	0	2	0.051	0.077	0.051	0.07	0.046	0.11	0.051	0.082	0.13	0.063	0.046	0.063	0.046	0	0.046	2	3	2	3	2	5	2	3	5	3	2	3	2	0
118	Alpha-2-antiplasmin OS=Homo sapiens GN=SERPINF2 PE=1 SV=3	A2AP_HUMAN	55	6.24	Homo sapiens	0	0	0	0	0	2	2	0	0	10	10	11	10	8	12	0	0	0	0	0	0.043	0.065	0	0	0.26	0.24	0.22	0.16	0.14	0.3	0	0	0	0	0	2	2	0	0	9	9	9	8	6
119	Tubulin alpha-4A chain OS=Homo sapiens GN=TUBA4A PE=1 SV=1	TBA4A_HUMAN	50	4.69	Homo sapiens	12	5	5	6	5	4	11	11	8	0	0	0	0	0	0	0.26	0.15	0.13	0.11	0.12	0.14	0.3	0.33	0.19	0	0	0	0	0	0	12	5	5	6	4	4	11	11	8	0	0	0	0	0
120	Keratin, type II cytoskeletal 5 OS=Homo sapiens GN=KRT5 PE=1 SV=3	K2C5_HUMAN	62	7.91	Homo sapiens	7	5	6	12	10	10	25	23	26	10	11	10	9	22	22	0.093	0.083	0.12	0.19	0.11	0.14	0.33	0.29	0.32	0.14	0.17	0.14	0.13	0.28	0.26	4	3	3	4	6	5	12	9	11	4	5	5	4	12
121	Complement component C8 beta chain OS=Homo sapiens GN=C8B PE=1 SV=3	CO8B_HUMAN	67	8.17	Homo sapiens	2	0	0	2	3	4	3	3	4	0	2	0	0	0	0	0.047	0	0	0.047	0.049	0.1	0.13	0.061	0.098	0	0.058	0	0	0	0	2	0	0	2	3	4	3	3	4	0	2	0	0	0
122	14-3-3 protein zeta/delta OS=Homo sapiens GN=YWHAZ PE=1 SV=1	1433Z_HUMAN	28	4.43	Homo sapiens	7	5	9	4	5	8	6	13	11	0	0	0	0	0	0	0.27	0.23	0.23	0.21	0.28	0.28	0.26	0.3	0.32	0	0	0	0	0	0	7	5	9	4	5	8	6	9	8	0	0	0	0	0
123	Tubulin beta-1 chain OS=Homo sapiens GN=TUBB1 PE=1 SV=1	TBB1_HUMAN	50	4.82	Homo sapiens	11	8	7	3	4	5	11	8	9	0	0	0	0	0	0	0.22	0.25	0.19	0.098	0.13	0.17	0.27	0.18	0.24	0	0	0	0	0	0	10	8	7	3	4	5	10	8	9	0	0	0	0	0
124	Complement C1q subcomponent subunit C OS=Homo sapiens GN=C1QC PE=1 SV=3	C1QC_HUMAN	26	8.58	Homo sapiens	3	2	2	3	0	0	2	3	3	3	2	3	3	2	2	0.16	0.11	0.11	0.16	0	0	0.11	0.16	0.16	0.16	0.11	0.15	0.16	0.11	0.11	3	2	2	3	0	0	2	3	3	3	2	3	3	2
125	Complement C1q subcomponent subunit B OS=Homo sapiens GN=C1QB PE=1 SV=3	C1QB_HUMAN	27	8.87	Homo sapiens	0	3	3	3	3	3	2	2	2	0	0	0	0	0	0	0	0.11	0.17	0.17	0.15	0.17	0.11	0.11	0.11	0	0	0	0	0	0	0	3	3	3	3	3	2	2	2	0	0	0	0	0
126	Spectrin alpha chain, erythrocytic 1 OS=Homo sapiens GN=SPTA1 PE=1 SV=5	SPTA1_HUMAN	280	4.69	Homo sapiens	0	0	0	0	0	0	0	0	0	0	0	0	0	0	0	0	0	0	0	0	0	0	0	0	0	0	0	0	0	0	0	0	0	0	0	0	0	0	0	0	0	0	0	0
127	Complement factor I OS=Homo sapiens GN=CFI PE=1 SV=2	CFAI_HUMAN	66	7.53	Homo sapiens	19	13	14	19	15	22	15	20	13	2	2	0	0	0	0	0.38	0.25	0.3	0.31	0.22	0.35	0.3	0.32	0.23	0.038	0.038	0	0	0	0	17	13	14	18	13	21	14	18	13	2	2	0	0	0
128	Angiotensinogen OS=Homo sapiens GN=AGT PE=1 SV=1	ANGT_HUMAN	53	6.27	Homo sapiens	0	0	0	3	3	3	2	2	0	5	8	4	4	7	5	0	0	0	0.078	0.078	0.078	0.064	0.064	0	0.13	0.2	0.12	0.12	0.26	0.18	0	0	0	3	3	3	2	2	0	5	8	4	4	6
129	Properdin OS=Homo sapiens GN=CFP PE=1 SV=2	PROP_HUMAN	51	7.92	Homo sapiens	0	2	0	2	0	0	2	3	4	12	12	13	10	12	13	0	0.066	0	0.066	0	0	0.092	0.12	0.15	0.21	0.24	0.22	0.19	0.22	0.22	0	2	0	2	0	0	2	3	4	10	10	11	9	11
130	Secreted phosphoprotein 24 OS=Homo sapiens GN=SPP2 PE=1 SV=1	SPP24_HUMAN	24	8.46	Homo sapiens	3	4	3	2	4	4	3	3	3	7	7	6	6	7	7	0.076	0.18	0.11	0.12	0.16	0.16	0.076	0.076	0.076	0.22	0.18	0.18	0.18	0.18	0.18	3	4	3	2	4	4	3	3	3	5	5	5	5	5
131	Extracellular superoxide dismutase [Cu-Zn] OS=Homo sapiens GN=SOD3 PE=1 SV=2	SODE_HUMAN	26	6.59	Homo sapiens	6	5	4	5	3	5	6	4	5	5	9	9	7	5	6	0.36	0.35	0.35	0.28	0.11	0.28	0.28	0.11	0.28	0.2	0.38	0.38	0.38	0.2	0.27	6	5	4	5	3	5	6	4	5	5	8	8	7	5
132	Thrombospondin-4 OS=Homo sapiens GN=THBS4 PE=1 SV=2	TSP4_HUMAN	106	4.23	Homo sapiens	12	7	10	10	8	10	9	10	12	12	10	11	10	11	10	0.13	0.074	0.11	0.13	0.098	0.17	0.081	0.077	0.11	0.11	0.1	0.15	0.13	0.1	0.099	11	4	7	8	7	8	6	7	9	9	8	9	9	8
133	Band 3 anion transport protein OS=Homo sapiens GN=SLC4A1 PE=1 SV=3	B3AT_HUMAN	102	4.84	Homo sapiens	0	0	0	2	0	0	0	0	0	0	0	0	0	0	0	0	0	0	0.024	0	0	0	0	0	0	0	0	0	0	0	0	0	0	2	0	0	0	0	0	0	0	0	0	0
134	Myosin light polypeptide 6 OS=Homo sapiens GN=MYL6 PE=1 SV=2	MYL6_HUMAN	17	4.29	Homo sapiens	9	8	8	5	3	4	5	6	5	0	0	0	0	0	0	0.52	0.56	0.43	0.32	0.16	0.32	0.32	0.32	0.32	0	0	0	0	0	0	8	7	6	4	2	4	4	5	4	0	0	0	0	0
135	Histone H4 OS=Homo sapiens GN=HIST1H4A PE=1 SV=2	H4_HUMAN	11	11.91	Homo sapiens	0	0	0	0	0	0	2	3	2	0	0	0	0	0	0	0	0	0	0	0	0	0.32	0.27	0.22	0	0	0	0	0	0	0	0	0	0	0	0	2	2	2	0	0	0	0	0
136	Integrin-linked protein kinase OS=Homo sapiens GN=ILK PE=1 SV=2	ILK_HUMAN	51	8.18	Homo sapiens	7	4	4	4	2	2	3	4	3	0	0	0	0	0	0	0.23	0.15	0.15	0.12	0.042	0.075	0.086	0.12	0.11	0	0	0	0	0	0	7	4	4	4	2	2	3	4	3	0	0	0	0	0
137	Pleckstrin OS=Homo sapiens GN=PLEK PE=1 SV=3	PLEK_HUMAN	40	8.45	Homo sapiens	6	5	7	6	4	7	8	7	7	0	0	0	0	0	0	0.33	0.33	0.26	0.16	0.16	0.35	0.36	0.36	0.33	0	0	0	0	0	0	6	5	7	6	4	7	8	7	7	0	0	0	0	0
138	Immunoglobulin J chain OS=Homo sapiens GN=IGJ PE=1 SV=4	IGJ_HUMAN	18	4.87	Homo sapiens	5	2	3	3	2	3	5	3	4	2	2	2	3	2	2	0.25	0.14	0.14	0.24	0.14	0.17	0.25	0.16	0.25	0.14	0.14	0.14	0.14	0.14	0.14	5	2	3	3	2	2	5	3	4	2	2	2	3	2
139	78 kDa glucose-regulated protein OS=Homo sapiens GN=HSPA5 PE=1 SV=2	GRP78_HUMAN	72	4.8	Homo sapiens	5	5	4	0	2	0	5	6	2	0	0	0	0	0	0	0.098	0.08	0.083	0	0.038	0	0.087	0.11	0.044	0	0	0	0	0	0	5	5	4	0	2	0	5	6	2	0	0	0	0	0
140	Phosphatidylinositol-glycan-specific phospholipase D OS=Homo sapiens GN=GPLD1 PE=1 SV=3	PHLD_HUMAN	92	6.33	Homo sapiens	0	0	0	0	0	0	0	0	0	0	3	2	2	0	0	0	0	0	0	0	0	0	0	0	0	0.042	0.029	0.03	0	0	0	0	0	0	0	0	0	0	0	0	3	2	2	0
141	Fermitin family homolog 3 OS=Homo sapiens GN=FERMT3 PE=1 SV=1	URP2_HUMAN	76	6.98	Homo sapiens	4	0	0	5	0	2	3	4	4	0	0	0	0	0	0	0.12	0	0	0.1	0	0.031	0.073	0.12	0.07	0	0	0	0	0	0	4	0	0	5	0	2	3	4	4	0	0	0	0	0
142	Ficolin-3 OS=Homo sapiens GN=FCN3 PE=1 SV=2	FCN3_HUMAN	33	6.66	Homo sapiens	0	3	2	0	2	0	0	0	0	3	3	2	3	3	3	0	0.12	0.064	0	0.077	0	0	0	0	0.11	0.11	0.064	0.11	0.11	0.11	0	3	2	0	2	0	0	0	0	3	3	2	3	3
143	Complement factor H-related protein 5 OS=Homo sapiens GN=CFHR5 PE=1 SV=1	FHR5_HUMAN	64	7.08	Homo sapiens	0	0	2	0	0	0	2	0	0	0	0	0	0	0	0	0	0	0.053	0	0	0	0.053	0	0	0	0	0	0	0	0	0	0	2	0	0	0	2	0	0	0	0	0	0	0
144	Spectrin beta chain, erythrocytic OS=Homo sapiens GN=SPTB PE=1 SV=5	SPTB1_HUMAN	246	4.92	Homo sapiens	0	0	0	0	0	0	0	0	0	0	0	0	0	0	0	0	0	0	0	0	0	0	0	0	0	0	0	0	0	0	0	0	0	0	0	0	0	0	0	0	0	0	0	0
145	Platelet basic protein OS=Homo sapiens GN=PPBP PE=1 SV=3	CXCL7_HUMAN	14	9.07	Homo sapiens	10	12	13	4	2	2	14	13	12	0	0	0	0	0	0	0.38	0.41	0.41	0.3	0.2	0.2	0.38	0.38	0.38	0	0	0	0	0	0	7	8	7	4	2	2	7	7	6	0	0	0	0	0
146	Fibulin-1 OS=Homo sapiens GN=FBLN1 PE=1 SV=4	FBLN1_HUMAN	77	4.86	Homo sapiens	0	0	0	0	0	0	0	0	0	0	0	0	0	6	6	0	0	0	0	0	0	0	0	0	0	0	0	0	0.14	0.11	0	0	0	0	0	0	0	0	0	0	0	0	0	6
147	Keratin, type I cytoskeletal 17 OS=Homo sapiens GN=KRT17 PE=1 SV=2	K1C17_HUMAN	48	4.67	Homo sapiens	0	0	0	6	0	6	26	34	32	0	0	7	0	21	23	0	0	0	0.12	0	0.12	0.5	0.52	0.54	0	0	0.11	0	0.36	0.37	0	0	0	2	0	3	16	24	23	0	0	2	0	12
148	Ig kappa chain V-III region HAH OS=Homo sapiens PE=2 SV=1	KV312_HUMAN	14	8.18	Homo sapiens	3	0	2	2	2	3	0	3	4	0	3	2	3	2	4	0.26	0	0.32	0.18	0.21	0.26	0	0.26	0.57	0	0.43	0.19	0.43	0.19	0.5	3	0	2	2	2	3	0	3	4	0	3	2	3	2
149	Protein S100-A9 OS=Homo sapiens GN=S100A9 PE=1 SV=1	S10A9_HUMAN	13	6.07	Homo sapiens	0	0	0	0	0	0	13	14	14	2	2	2	2	2	0	0	0	0	0	0	0	0.78	0.82	0.67	0.25	0.25	0.25	0.25	0.25	0	0	0	0	0	0	0	11	12	12	2	2	2	2	2
150	Alpha-1-acid glycoprotein 2 OS=Homo sapiens GN=ORM2 PE=1 SV=2	A1AG2_HUMAN	24	4.76	Homo sapiens	0	0	3	4	0	0	0	3	3	9	8	8	9	5	5	0	0	0.095	0.14	0	0	0	0.16	0.095	0.4	0.4	0.4	0.4	0.28	0.23	0	0	2	3	0	0	0	2	2	6	5	5	6	3
151	Ras-related protein Rap-1b OS=Homo sapiens GN=RAP1B PE=1 SV=1	RAP1B_HUMAN	21	5.39	Homo sapiens	3	5	4	3	4	6	4	6	7	0	0	0	0	0	0	0.15	0.25	0.18	0.076	0.21	0.27	0.22	0.35	0.39	0	0	0	0	0	0	3	5	4	3	4	6	3	6	7	0	0	0	0	0
152	Complement component C8 gamma chain OS=Homo sapiens GN=C8G PE=1 SV=3	CO8G_HUMAN	22	8.48	Homo sapiens	3	0	0	0	0	0	3	0	2	0	0	0	0	0	0	0.19	0	0	0	0	0	0.2	0	0.14	0	0	0	0	0	0	3	0	0	0	0	0	3	0	2	0	0	0	0	0
153	Ankyrin-1 OS=Homo sapiens GN=ANK1 PE=1 SV=3	ANK1_HUMAN	206	5.92	Homo sapiens	0	0	0	0	0	0	0	0	0	0	0	0	0	0	0	0	0	0	0	0	0	0	0	0	0	0	0	0	0	0	0	0	0	0	0	0	0	0	0	0	0	0	0	0
154	Protein S100-A8 OS=Homo sapiens GN=S100A8 PE=1 SV=1	S10A8_HUMAN	11	7.07	Homo sapiens	0	0	0	0	0	0	14	13	15	0	4	0	2	3	0	0	0	0	0	0	0	0.52	0.52	0.59	0	0.28	0	0.19	0.19	0	0	0	0	0	0	0	12	11	13	0	4	0	2	3
155	Ig heavy chain V-III region 23 OS=Homo sapiens GN=IGHV3-23 PE=1 SV=2	HV303_HUMAN	13	8.46	Homo sapiens	3	0	0	2	0	2	2	0	0	0	2	0	3	2	4	0.31	0	0	0.26	0	0.26	0.26	0	0	0	0.19	0	0.35	0.26	0.26	3	0	0	2	0	2	2	0	0	0	2	0	3	2
156	Cofilin-1 OS=Homo sapiens GN=CFL1 PE=1 SV=3	COF1_HUMAN	19	8.29	Homo sapiens	2	2	4	0	0	0	6	5	5	0	0	0	0	0	0	0.15	0.16	0.3	0	0	0	0.37	0.31	0.4	0	0	0	0	0	0	2	2	4	0	0	0	6	5	5	0	0	0	0	0
157	Profilin-1 OS=Homo sapiens GN=PFN1 PE=1 SV=2	PROF1_HUMAN	15	8.46	Homo sapiens	4	4	3	0	0	0	5	3	3	0	0	0	0	0	0	0.33	0.31	0.28	0	0	0	0.34	0.16	0.18	0	0	0	0	0	0	4	4	3	0	0	0	5	3	3	0	0	0	0	0
158	Collectin-11 OS=Homo sapiens GN=COLEC11 PE=1 SV=1	COL11_HUMAN	29	5.06	Homo sapiens	11	8	8	7	7	7	9	8	8	2	3	3	3	3	3	0.34	0.3	0.23	0.23	0.3	0.3	0.3	0.34	0.3	0.1	0.14	0.14	0.14	0.14	0.14	9	7	6	6	7	7	8	7	7	2	3	3	3	3
159	Afamin OS=Homo sapiens GN=AFM PE=1 SV=1	AFAM_HUMAN	69	5.7	Homo sapiens	0	0	0	0	0	0	0	0	0	4	6	6	5	4	2	0	0	0	0	0	0	0	0	0	0.07	0.087	0.11	0.083	0.067	0.032	0	0	0	0	0	0	0	0	0	4	5	6	5	4
160	Serum amyloid P-component OS=Homo sapiens GN=APCS PE=1 SV=2	SAMP_HUMAN	25	6.52	Homo sapiens	0	0	0	0	0	0	0	0	0	5	5	5	5	4	5	0	0	0	0	0	0	0	0	0	0.22	0.23	0.22	0.22	0.19	0.2	0	0	0	0	0	0	0	0	0	5	5	5	5	4
161	Platelet glycoprotein IX OS=Homo sapiens GN=GP9 PE=1 SV=3	GPIX_HUMAN	19	6.32	Homo sapiens	8	5	4	0	0	2	4	6	4	0	0	0	0	0	0	0.24	0.24	0.16	0	0	0.16	0.24	0.24	0.24	0	0	0	0	0	0	5	3	2	0	0	2	3	4	3	0	0	0	0	0
162	Selenoprotein P OS=Homo sapiens GN=SEPP1 PE=1 SV=3	SEPP1_HUMAN	43	7.92	Homo sapiens	0	0	0	0	0	0	0	0	0	4	4	4	4	5	5	0	0	0	0	0	0	0	0	0	0.12	0.12	0.12	0.12	0.14	0.14	0	0	0	0	0	0	0	0	0	3	3	3	3	4
163	Coagulation factor XIII A chain OS=Homo sapiens GN=F13A1 PE=1 SV=4	F13A_HUMAN	83	5.95	Homo sapiens	2	0	2	0	0	0	0	4	0	4	0	3	2	3	4	0.046	0	0.037	0	0	0	0	0.07	0	0.063	0	0.04	0.023	0.04	0.052	2	0	2	0	0	0	0	4	0	4	0	3	2	3
164	Apolipoprotein C-IV OS=Homo sapiens GN=APOC4 PE=1 SV=1	APOC4_HUMAN	15	9.13	Homo sapiens	0	0	0	0	0	0	0	0	0	8	7	5	6	8	8	0	0	0	0	0	0	0	0	0	0.4	0.4	0.31	0.34	0.4	0.4	0	0	0	0	0	0	0	0	0	8	7	5	6	8
165	Platelet glycoprotein Ib alpha chain OS=Homo sapiens GN=GP1BA PE=1 SV=2	GP1BA_HUMAN	72	6.24	Homo sapiens	0	3	0	0	0	0	0	0	2	0	0	0	0	0	0	0	0.049	0	0	0	0	0	0	0.037	0	0	0	0	0	0	0	3	0	0	0	0	0	0	2	0	0	0	0	0
166	Keratin, type I cytoskeletal 14 OS=Homo sapiens GN=KRT14 PE=1 SV=4	K1C14_HUMAN	52	4.81	Homo sapiens	0	0	0	11	12	0	28	31	24	14	12	0	0	34	33	0	0	0	0.24	0.24	0	0.49	0.44	0.4	0.26	0.26	0	0	0.47	0.5	0	0	0	2	2	0	7	6	4	2	2	0	0	9
167	Plasma kallikrein OS=Homo sapiens GN=KLKB1 PE=1 SV=1	KLKB1_HUMAN	71	8.26	Homo sapiens	0	0	0	0	0	0	0	0	0	5	5	6	4	4	6	0	0	0	0	0	0	0	0	0	0.075	0.075	0.096	0.075	0.075	0.091	0	0	0	0	0	0	0	0	0	5	5	6	4	4
168	Pyruvate kinase PKM OS=Homo sapiens GN=PKM PE=1 SV=4	KPYM_HUMAN	58	7.94	Homo sapiens	0	2	4	0	0	2	3	6	6	0	0	0	0	0	0	0	0.045	0.081	0	0	0.04	0.064	0.12	0.14	0	0	0	0	0	0	0	2	4	0	0	2	3	6	6	0	0	0	0	0
169	Fructose-bisphosphate aldolase A OS=Homo sapiens GN=ALDOA PE=1 SV=2	ALDOA_HUMAN	39	8.2	Homo sapiens	0	3	3	0	0	0	7	8	7	0	0	0	0	0	0	0	0.12	0.11	0	0	0	0.26	0.29	0.26	0	0	0	0	0	0	0	3	3	0	0	0	7	8	6	0	0	0	0	0
170	Lactotransferrin OS=Homo sapiens GN=LTF PE=1 SV=6	TRFL_HUMAN	78	8.17	Homo sapiens	0	0	0	0	0	0	0	0	0	0	0	0	0	0	0	0	0	0	0	0	0	0	0	0	0	0	0	0	0	0	0	0	0	0	0	0	0	0	0	0	0	0	0	0
171	Neutrophil defensin 1 OS=Homo sapiens GN=DEFA1 PE=1 SV=1	DEF1_HUMAN	10	7.04	Homo sapiens	0	0	0	0	0	0	2	2	0	2	2	2	2	2	2	0	0	0	0	0	0	0.11	0.11	0	0.19	0.19	0.19	0.19	0.19	0.19	0	0	0	0	0	0	2	2	0	2	2	2	2	2
172	Clathrin heavy chain 1 OS=Homo sapiens GN=CLTC PE=1 SV=5	CLH1_HUMAN	192	5.42	Homo sapiens	3	0	0	0	0	0	3	2	4	0	0	0	0	0	0	0.025	0	0	0	0	0	0.023	0.016	0.027	0	0	0	0	0	0	3	0	0	0	0	0	3	2	4	0	0	0	0	0
173	Integrin alpha-M OS=Homo sapiens GN=ITGAM PE=1 SV=2	ITAM_HUMAN	127	7.24	Homo sapiens	0	0	0	0	0	0	0	0	0	0	0	0	0	0	0	0	0	0	0	0	0	0	0	0	0	0	0	0	0	0	0	0	0	0	0	0	0	0	0	0	0	0	0	0
174	N-acetylmuramoyl-L-alanine amidase OS=Homo sapiens GN=PGLYRP2 PE=1 SV=1	PGRP2_HUMAN	62	7.59	Homo sapiens	0	0	2	0	3	4	3	3	0	3	0	3	2	3	2	0	0	0.059	0	0.059	0.14	0.064	0.059	0	0.099	0	0.069	0.056	0.095	0.056	0	0	2	0	3	4	2	2	0	3	0	3	2	3
175	Integrin beta-1 OS=Homo sapiens GN=ITGB1 PE=1 SV=2	ITB1_HUMAN	88	5.04	Homo sapiens	3	4	2	0	0	0	0	2	2	0	0	0	0	0	0	0.044	0.05	0.025	0	0	0	0	0.025	0.024	0	0	0	0	0	0	3	4	2	0	0	0	0	2	2	0	0	0	0	0
176	Myeloperoxidase OS=Homo sapiens GN=MPO PE=1 SV=1	PERM_HUMAN	84	9.14	Homo sapiens	0	0	0	0	0	0	0	0	0	0	0	0	0	0	0	0	0	0	0	0	0	0	0	0	0	0	0	0	0	0	0	0	0	0	0	0	0	0	0	0	0	0	0	0
177	Cholesteryl ester transfer protein OS=Homo sapiens GN=CETP PE=1 SV=2	CETP_HUMAN	55	6.02	Homo sapiens	0	0	0	0	0	0	0	2	0	4	4	3	3	6	6	0	0	0	0	0	0	0	0.049	0	0.091	0.097	0.075	0.065	0.11	0.11	0	0	0	0	0	0	0	2	0	4	4	3	3	6
178	Cartilage acidic protein 1 OS=Homo sapiens GN=CRTAC1 PE=1 SV=2	CRAC1_HUMAN	71	4.73	Homo sapiens	5	2	6	4	4	5	3	4	4	0	0	0	0	0	0	0.068	0.035	0.12	0.077	0.054	0.098	0.051	0.073	0.088	0	0	0	0	0	0	5	2	6	4	3	5	3	4	4	0	0	0	0	0
179	CD44 antigen OS=Homo sapiens GN=CD44 PE=1 SV=3	CD44_HUMAN	82	5	Homo sapiens	3	3	2	4	4	3	0	2	3	0	0	0	0	0	0	0.028	0.028	0.028	0.042	0.042	0.042	0	0.028	0.028	0	0	0	0	0	0	2	2	2	3	3	3	0	2	2	0	0	0	0	0
180	Ig mu heavy chain disease protein OS=Homo sapiens PE=1 SV=1	MUCB_HUMAN	43	4.89	Homo sapiens	18	0	13	18	0	17	0	0	19	0	0	0	0	0	0	0.4	0	0.29	0.35	0	0.35	0	0	0.43	0	0	0	0	0	0	4	0	2	3	0	2	0	0	2	0	0	0	0	0
181	Heat shock cognate 71 kDa protein OS=Homo sapiens GN=HSPA8 PE=1 SV=1	HSP7C_HUMAN	71	5.16	Homo sapiens	7	4	7	3	0	0	8	9	7	0	0	0	0	0	0	0.13	0.073	0.13	0.053	0	0	0.16	0.16	0.14	0	0	0	0	0	0	6	3	6	2	0	0	7	8	7	0	0	0	0	0
182	Glucosidase 2 subunit beta OS=Homo sapiens GN=PRKCSH PE=1 SV=2	GLU2B_HUMAN	59	4.05	Homo sapiens	0	0	0	0	2	2	0	3	2	0	0	0	0	0	0	0	0	0	0	0.038	0.038	0	0.064	0.038	0	0	0	0	0	0	0	0	0	0	2	2	0	3	2	0	0	0	0	0
183	Serum deprivation-response protein OS=Homo sapiens GN=SDPR PE=1 SV=3	SDPR_HUMAN	47	4.88	Homo sapiens	5	2	3	2	0	2	2	5	3	0	0	0	0	0	0	0.087	0.045	0.085	0.047	0	0.066	0.066	0.087	0.085	0	0	0	0	0	0	5	2	3	2	0	2	2	5	3	0	0	0	0	0
184	WD repeat-containing protein 1 OS=Homo sapiens GN=WDR1 PE=1 SV=4	WDR1_HUMAN	66	6.64	Homo sapiens	2	0	0	0	0	0	2	0	0	0	0	0	0	0	0	0.051	0	0	0	0	0	0.04	0	0	0	0	0	0	0	0	2	0	0	0	0	0	2	0	0	0	0	0	0	0
185	Latent-transforming growth factor beta-binding protein 1 OS=Homo sapiens GN=LTBP1 PE=1 SV=4	LTBP1_HUMAN	187	5.85	Homo sapiens	5	3	4	0	0	0	4	5	6	0	0	0	0	0	0	0.047	0.026	0.037	0	0	0	0.04	0.049	0.055	0	0	0	0	0	0	5	3	4	0	0	0	4	5	6	0	0	0	0	0
186	Ig gamma-4 chain C region OS=Homo sapiens GN=IGHG4 PE=1 SV=1	IGHG4_HUMAN	36	7.41	Homo sapiens	22	21	20	18	21	18	0	0	0	0	0	0	0	0	0	0.44	0.43	0.39	0.39	0.44	0.39	0	0	0	0	0	0	0	0	0	2	2	2	2	2	2	0	0	0	0	0	0	0	0
187	HLA class I histocompatibility antigen, A-24 alpha chain OS=Homo sapiens GN=HLA-A PE=1 SV=2	1A24_HUMAN	41	6.29	Homo sapiens	5	0	2	2	0	0	7	5	2	0	0	0	0	0	0	0.18	0	0.1	0.079	0	0	0.18	0.18	0.066	0	0	0	0	0	0	5	0	2	2	0	0	7	5	2	0	0	0	0	0
188	Desmoplakin OS=Homo sapiens GN=DSP PE=1 SV=3	DESP_HUMAN	332	6.78	Homo sapiens	0	0	0	0	0	0	17	13	15	0	0	0	0	2	3	0	0	0	0	0	0	0.071	0.06	0.057	0	0	0	0	0.0066	0.0094	0	0	0	0	0	0	17	13	15	0	0	0	0	2
189	Sushi, von Willebrand factor type A, EGF and pentraxin domain-containing protein 1 OS=Homo sapiens GN=SVEP1 PE=1 SV=3	SVEP1_HUMAN	390	5.2	Homo sapiens	0	3	4	4	0	3	0	3	2	0	0	0	0	0	0	0	0.0095	0.014	0.013	0	0.0092	0	0.01	0.0067	0	0	0	0	0	0	0	3	4	4	0	3	0	3	2	0	0	0	0	0
190	Apolipoprotein A-V OS=Homo sapiens GN=APOA5 PE=1 SV=1	APOA5_HUMAN	41	6.4	Homo sapiens	3	2	0	2	2	3	2	0	0	4	3	2	2	0	2	0.11	0.066	0	0.074	0.057	0.11	0.085	0	0	0.18	0.1	0.085	0.074	0	0.068	3	2	0	2	2	3	2	0	0	4	3	2	2	0
191	Galectin-3-binding protein OS=Homo sapiens GN=LGALS3BP PE=1 SV=1	LG3BP_HUMAN	65	4.9	Homo sapiens	0	0	0	0	0	0	0	0	0	0	0	0	0	0	0	0	0	0	0	0	0	0	0	0	0	0	0	0	0	0	0	0	0	0	0	0	0	0	0	0	0	0	0	0
192	Calreticulin OS=Homo sapiens GN=CALR PE=1 SV=1	CALR_HUMAN	48	4.04	Homo sapiens	0	0	0	0	0	0	0	0	0	0	0	0	0	0	0	0	0	0	0	0	0	0	0	0	0	0	0	0	0	0	0	0	0	0	0	0	0	0	0	0	0	0	0	0
193	Mannosyl-oligosaccharide 1,2-alpha-mannosidase IA OS=Homo sapiens GN=MAN1A1 PE=1 SV=3	MA1A1_HUMAN	73	6.44	Homo sapiens	0	0	0	0	0	0	0	0	0	3	4	2	2	0	5	0	0	0	0	0	0	0	0	0	0.057	0.074	0.043	0.034	0	0.09	0	0	0	0	0	0	0	0	0	3	4	2	2	0
194	Ig lambda chain V-III region LOI OS=Homo sapiens PE=1 SV=1	LV302_HUMAN	12	4.72	Homo sapiens	0	2	2	0	2	0	2	0	0	0	0	0	0	0	0	0	0.22	0.22	0	0.22	0	0.22	0	0	0	0	0	0	0	0	0	2	2	0	2	0	2	0	0	0	0	0	0	0
195	Serum paraoxonase/lactonase 3 OS=Homo sapiens GN=PON3 PE=1 SV=3	PON3_HUMAN	40	5.1	Homo sapiens	3	0	0	0	4	3	0	0	0	0	3	0	0	0	0	0.099	0	0	0	0.099	0.099	0	0	0	0	0.082	0	0	0	0	2	0	0	0	2	2	0	0	0	0	2	0	0	0
196	Peptidyl-prolyl cis-trans isomerase A OS=Homo sapiens GN=PPIA PE=1 SV=2	PPIA_HUMAN	18	7.97	Homo sapiens	2	0	2	0	0	0	4	2	3	0	0	0	0	0	0	0.16	0	0.16	0	0	0	0.33	0.16	0.25	0	0	0	0	0	0	2	0	2	0	0	0	4	2	3	0	0	0	0	0
197	SPARC-like protein 1 OS=Homo sapiens GN=SPARCL1 PE=1 SV=2	SPRL1_HUMAN	75	4.45	Homo sapiens	0	2	2	5	5	5	0	3	2	0	0	0	0	0	0	0	0.041	0.042	0.11	0.12	0.1	0	0.047	0.039	0	0	0	0	0	0	0	2	2	5	5	5	0	3	2	0	0	0	0	0
198	Actin, alpha cardiac muscle 1 OS=Homo sapiens GN=ACTC1 PE=1 SV=1	ACTC_HUMAN	42	5.05	Homo sapiens	25	19	21	0	0	0	0	24	0	0	0	0	0	0	0	0.31	0.29	0.27	0	0	0	0	0.29	0	0	0	0	0	0	0	2	2	2	0	0	0	0	2	0	0	0	0	0	0
199	LIM and senescent cell antigen-like-containing domain protein 1 OS=Homo sapiens GN=LIMS1 PE=1 SV=4	LIMS1_HUMAN	37	8.08	Homo sapiens	3	2	2	0	0	0	0	4	3	0	0	0	0	0	0	0.13	0.086	0.077	0	0	0	0	0.14	0.1	0	0	0	0	0	0	3	2	2	0	0	0	0	4	3	0	0	0	0	0
200	Dermcidin OS=Homo sapiens GN=DCD PE=1 SV=2	DCD_HUMAN	11	6.52	Homo sapiens	0	0	0	0	0	0	0	0	0	3	3	2	3	2	2	0	0	0	0	0	0	0	0	0	0.23	0.23	0.23	0.23	0.23	0.23	0	0	0	0	0	0	0	0	0	3	3	2	2	2
201	Histone H2B type 1-C/E/F/G/I OS=Homo sapiens GN=HIST1H2BC PE=1 SV=4	H2B1C_HUMAN	14	11	Homo sapiens	0	0	0	0	0	0	0	0	0	0	0	0	0	0	0	0	0	0	0	0	0	0	0	0	0	0	0	0	0	0	0	0	0	0	0	0	0	0	0	0	0	0	0	0
202	Mannan-binding lectin serine protease 2 OS=Homo sapiens GN=MASP2 PE=1 SV=4	MASP2_HUMAN	76	5.37	Homo sapiens	0	0	0	0	0	0	0	0	0	0	0	0	0	0	0	0	0	0	0	0	0	0	0	0	0	0	0	0	0	0	0	0	0	0	0	0	0	0	0	0	0	0	0	0
203	Nidogen-1 OS=Homo sapiens GN=NID1 PE=1 SV=3	NID1_HUMAN	136	4.93	Homo sapiens	2	2	5	2	3	3	4	3	3	0	0	2	0	0	0	0.02	0.018	0.05	0.022	0.027	0.043	0.03	0.029	0.033	0	0	0.021	0	0	0	2	2	5	2	3	3	4	3	3	0	0	2	0	0
204	Heat shock protein HSP 90-alpha OS=Homo sapiens GN=HSP90AA1 PE=1 SV=5	HS90A_HUMAN	85	4.66	Homo sapiens	2	2	0	0	0	3	3	2	0	0	0	0	0	0	0	0.04	0.038	0	0	0	0.041	0.037	0.033	0	0	0	0	0	0	0	2	2	0	0	0	3	2	2	0	0	0	0	0	0
205	SPARC OS=Homo sapiens GN=SPARC PE=1 SV=1	SPRC_HUMAN	35	4.47	Homo sapiens	2	2	0	0	0	0	2	2	0	0	0	0	0	0	0	0.079	0.079	0	0	0	0	0.079	0.079	0	0	0	0	0	0	0	2	2	0	0	0	0	2	2	0	0	0	0	0	0
206	Ig heavy chain V-III region GAL OS=Homo sapiens PE=1 SV=1	HV320_HUMAN	13	8.7	Homo sapiens	3	0	2	0	2	0	2	3	3	0	2	0	0	2	2	0.25	0	0.17	0	0.17	0	0.17	0.25	0.25	0	0.17	0	0	0.17	0.17	3	0	2	0	2	0	2	3	3	0	2	0	0	2
207	Insulin-like growth factor-binding protein complex acid labile subunit OS=Homo sapiens GN=IGFALS PE=1 SV=1	ALS_HUMAN	66	6.78	Homo sapiens	4	2	3	2	0	2	4	3	0	2	2	0	0	0	0	0.073	0.05	0.074	0.053	0	0.05	0.099	0.074	0	0.041	0.041	0	0	0	0	4	2	3	2	0	2	4	3	0	2	2	0	0	0
208	Filaggrin-2 OS=Homo sapiens GN=FLG2 PE=1 SV=1	FILA2_HUMAN	248	8.35	Homo sapiens	0	0	0	0	2	2	4	7	4	0	0	0	0	0	0	0	0	0	0	0.015	0.015	0.033	0.042	0.031	0	0	0	0	0	0	0	0	0	0	2	2	4	7	4	0	0	0	0	0
209	Proprotein convertase subtilisin/kexin type 9 OS=Homo sapiens GN=PCSK9 PE=1 SV=3	PCSK9_HUMAN	74	6.59	Homo sapiens	0	0	0	0	0	0	0	0	0	3	4	3	3	2	3	0	0	0	0	0	0	0	0	0	0.042	0.056	0.042	0.042	0.03	0.045	0	0	0	0	0	0	0	0	0	3	4	3	3	2
210	Isocitrate dehydrogenase [NADP], mitochondrial OS=Homo sapiens GN=IDH2 PE=1 SV=2	IDHP_HUMAN	51	8.95	Homo sapiens	2	2	4	0	0	0	2	5	3	0	0	0	0	0	0	0.044	0.058	0.11	0	0	0	0.049	0.15	0.071	0	0	0	0	0	0	2	2	4	0	0	0	2	5	3	0	0	0	0	0
211	Carboxypeptidase N catalytic chain OS=Homo sapiens GN=CPN1 PE=1 SV=1	CBPN_HUMAN	52	7.36	Homo sapiens	0	0	0	0	0	0	0	0	0	0	2	0	0	0	0	0	0	0	0	0	0	0	0	0	0	0.092	0	0	0	0	0	0	0	0	0	0	0	0	0	0	2	0	0	0
212	Complement factor H-related protein 1 OS=Homo sapiens GN=CFHR1 PE=1 SV=2	FHR1_HUMAN	38	7.42	Homo sapiens	0	0	5	0	0	2	6	0	7	0	0	0	0	0	0	0	0	0.19	0	0	0.07	0.27	0	0.19	0	0	0	0	0	0	0	0	2	0	0	2	3	0	2	0	0	0	0	0
213	Protein S100-A7 OS=Homo sapiens GN=S100A7 PE=1 SV=4	S10A7_HUMAN	11	6.78	Homo sapiens	0	0	0	2	0	0	21	23	20	0	0	0	0	0	0	0	0	0	0.3	0	0	0.62	0.62	0.62	0	0	0	0	0	0	0	0	0	2	0	0	18	18	17	0	0	0	0	0
214	ATP synthase subunit beta, mitochondrial OS=Homo sapiens GN=ATP5B PE=1 SV=3	ATPB_HUMAN	57	5.07	Homo sapiens	4	0	3	0	0	0	4	7	4	0	0	0	0	0	0	0.11	0	0.079	0	0	0	0.11	0.16	0.11	0	0	0	0	0	0	4	0	3	0	0	0	4	7	4	0	0	0	0	0
215	Fibrinogen-like protein 1 OS=Homo sapiens GN=FGL1 PE=1 SV=3	FGL1_HUMAN	36	5.67	Homo sapiens	0	0	0	0	0	0	0	0	0	0	0	0	0	0	0	0	0	0	0	0	0	0	0	0	0	0	0	0	0	0	0	0	0	0	0	0	0	0	0	0	0	0	0	0
216	Histone H2A.J OS=Homo sapiens GN=H2AFJ PE=1 SV=1	H2AJ_HUMAN	14	11.55	Homo sapiens	0	0	0	0	0	0	0	0	0	0	0	0	0	0	0	0	0	0	0	0	0	0	0	0	0	0	0	0	0	0	0	0	0	0	0	0	0	0	0	0	0	0	0	0
217	Ig heavy chain V-III region TRO OS=Homo sapiens PE=1 SV=1	HV301_HUMAN	13	10	Homo sapiens	0	0	0	0	0	0	0	0	0	0	0	0	0	0	0	0	0	0	0	0	0	0	0	0	0	0	0	0	0	0	0	0	0	0	0	0	0	0	0	0	0	0	0	0
218	Ig alpha-2 chain C region OS=Homo sapiens GN=IGHA2 PE=1 SV=3	IGHA2_HUMAN	37	6.02	Homo sapiens	0	0	0	0	0	0	0	0	15	15	12	15	16	14	16	0	0	0	0	0	0	0	0	0.39	0.47	0.43	0.45	0.48	0.43	0.48	0	0	0	0	0	0	0	0	2	2	2	2	2	2
219	Integrin alpha-6 OS=Homo sapiens GN=ITGA6 PE=1 SV=5	ITA6_HUMAN	127	6.57	Homo sapiens	2	2	2	0	0	0	0	0	0	0	0	0	0	0	0	0.02	0.02	0.015	0	0	0	0	0	0	0	0	0	0	0	0	2	2	2	0	0	0	0	0	0	0	0	0	0	0
220	Ig kappa chain V-IV region B17 OS=Homo sapiens PE=2 SV=1	KV404_HUMAN	15	6.51	Homo sapiens	4	2	0	0	0	0	0	4	0	0	0	2	0	2	2	0.29	0.2	0	0	0	0	0	0.27	0	0	0	0.2	0	0.18	0.18	2	2	0	0	0	0	0	2	0	0	0	2	0	2
221	HLA class I histocompatibility antigen, B-35 alpha chain OS=Homo sapiens GN=HLA-B PE=1 SV=1	1B35_HUMAN	40	6.43	Homo sapiens	6	0	4	0	0	0	0	6	5	0	0	0	0	0	0	0.19	0	0.15	0	0	0	0	0.12	0.18	0	0	0	0	0	0	4	0	3	0	0	0	0	3	3	0	0	0	0	0
222	Tubulin alpha-1B chain OS=Homo sapiens GN=TUBA1B PE=1 SV=1	TBA1B_HUMAN	50	4.7	Homo sapiens	10	0	0	0	0	0	7	8	7	0	0	0	0	0	0	0.25	0	0	0	0	0	0.25	0.28	0.18	0	0	0	0	0	0	3	0	0	0	0	0	2	2	2	0	0	0	0	0
223	Ig heavy chain V-III region TIL OS=Homo sapiens PE=1 SV=1	HV304_HUMAN	12	9.4	Homo sapiens	2	0	0	0	0	0	0	2	0	0	0	0	0	0	0	0.24	0	0	0	0	0	0	0.24	0	0	0	0	0	0	0	2	0	0	0	0	0	0	2	0	0	0	0	0	0
224	Solute carrier family 2, facilitated glucose transporter member 1 OS=Homo sapiens GN=SLC2A1 PE=1 SV=2	GTR1_HUMAN	54	8.92	Homo sapiens	0	0	0	0	0	0	0	0	0	0	0	0	0	0	0	0	0	0	0	0	0	0	0	0	0	0	0	0	0	0	0	0	0	0	0	0	0	0	0	0	0	0	0	0
225	Carboxypeptidase N subunit 2 OS=Homo sapiens GN=CPN2 PE=1 SV=3	CPN2_HUMAN	61	5.89	Homo sapiens	0	0	0	0	0	0	0	0	0	0	0	0	0	0	0	0	0	0	0	0	0	0	0	0	0	0	0	0	0	0	0	0	0	0	0	0	0	0	0	0	0	0	0	0
226	L-lactate dehydrogenase B chain OS=Homo sapiens GN=LDHB PE=1 SV=2	LDHB_HUMAN	37	5.93	Homo sapiens	2	0	3	0	0	0	0	0	0	0	0	0	0	0	0	0.069	0	0.11	0	0	0	0	0	0	0	0	0	0	0	0	2	0	3	0	0	0	0	0	0	0	0	0	0	0
227	Phospholipid transfer protein OS=Homo sapiens GN=PLTP PE=1 SV=1	PLTP_HUMAN	55	7.01	Homo sapiens	0	0	0	0	0	0	0	0	0	2	2	2	2	3	3	0	0	0	0	0	0	0	0	0	0.051	0.051	0.051	0.051	0.11	0.051	0	0	0	0	0	0	0	0	0	2	2	2	2	3
228	Integrin beta-2 OS=Homo sapiens GN=ITGB2 PE=1 SV=2	ITB2_HUMAN	85	6.94	Homo sapiens	0	0	0	0	0	0	0	0	0	0	0	0	0	0	0	0	0	0	0	0	0	0	0	0	0	0	0	0	0	0	0	0	0	0	0	0	0	0	0	0	0	0	0	0
229	Titin OS=Homo sapiens GN=TTN PE=1 SV=4	TITIN_HUMAN	381	6.02	Homo sapiens	0	0	0	0	0	0	0	0	0	0	0	0	0	0	0	0	0	0	0	0	0	0	0	0	0	0	0	0	0	0	0	0	0	0	0	0	0	0	0	0	0	0	0	0
230	Cathelicidin antimicrobial peptide OS=Homo sapiens GN=CAMP PE=1 SV=1	CAMP_HUMAN	19	10.03	Homo sapiens	0	0	0	0	0	0	0	0	0	3	2	2	2	3	3	0	0	0	0	0	0	0	0	0	0.16	0.11	0.11	0.11	0.16	0.16	0	0	0	0	0	0	0	0	0	3	2	2	2	3
231	Angiopoietin-related protein 6 OS=Homo sapiens GN=ANGPTL6 PE=1 SV=1	ANGL6_HUMAN	52	8.64	Homo sapiens	0	3	0	4	3	8	2	0	3	0	0	0	0	0	0	0	0.098	0	0.13	0.077	0.29	0.062	0	0.091	0	0	0	0	0	0	0	3	0	4	3	8	2	0	3	0	0	0	0	0
232	Keratin, type I cytoskeletal 13 OS=Homo sapiens GN=KRT13 PE=1 SV=4	K1C13_HUMAN	50	4.61	Homo sapiens	0	0	0	0	0	0	0	0	0	0	0	0	0	0	0	0	0	0	0	0	0	0	0	0	0	0	0	0	0	0	0	0	0	0	0	0	0	0	0	0	0	0	0	0
233	Platelet glycoprotein Ib beta chain OS=Homo sapiens GN=GP1BB PE=1 SV=1	GP1BB_HUMAN	22	9.37	Homo sapiens	3	2	0	0	0	0	3	2	2	0	0	0	0	0	0	0.13	0.083	0	0	0	0	0.13	0.083	0.083	0	0	0	0	0	0	3	2	0	0	0	0	3	2	2	0	0	0	0	0
234	Beta-parvin OS=Homo sapiens GN=PARVB PE=1 SV=1	PARVB_HUMAN	42	6.72	Homo sapiens	0	0	3	0	0	0	0	2	2	0	0	0	0	0	0	0	0	0.08	0	0	0	0	0.074	0.071	0	0	0	0	0	0	0	0	3	0	0	0	0	2	2	0	0	0	0	0
235	Transgelin-2 OS=Homo sapiens GN=TAGLN2 PE=1 SV=3	TAGL2_HUMAN	22	8.45	Homo sapiens	0	3	3	0	0	0	4	3	2	0	0	0	0	0	0	0	0.2	0.2	0	0	0	0.26	0.2	0.13	0	0	0	0	0	0	0	3	3	0	0	0	4	3	2	0	0	0	0	0
236	Transforming protein RhoA OS=Homo sapiens GN=RHOA PE=1 SV=1	RHOA_HUMAN	22	5.89	Homo sapiens	4	3	0	2	0	0	3	4	0	0	0	0	0	0	0	0.2	0.2	0	0.14	0	0	0.2	0.14	0	0	0	0	0	0	0	3	3	0	2	0	0	3	2	0	0	0	0	0	0
237	60 kDa heat shock protein, mitochondrial OS=Homo sapiens GN=HSPD1 PE=1 SV=2	CH60_HUMAN	61	5.55	Homo sapiens	2	5	7	0	0	0	4	4	5	0	0	0	0	0	0	0.063	0.1	0.16	0	0	0	0.096	0.1	0.14	0	0	0	0	0	0	2	5	7	0	0	0	4	4	5	0	0	0	0	0
238	Ig lambda chain V-IV region Hil OS=Homo sapiens PE=1 SV=1	LV403_HUMAN	12	6.45	Homo sapiens	0	0	0	0	0	0	0	0	0	0	0	0	0	0	0	0	0	0	0	0	0	0	0	0	0	0	0	0	0	0	0	0	0	0	0	0	0	0	0	0	0	0	0	0
239	Carboxypeptidase B2 OS=Homo sapiens GN=CPB2 PE=1 SV=2	CBPB2_HUMAN	48	7.77	Homo sapiens	0	0	0	0	0	0	0	0	0	0	0	0	0	0	3	0	0	0	0	0	0	0	0	0	0	0	0	0	0	0.09	0	0	0	0	0	0	0	0	0	0	0	0	0	0
240	Glutathione peroxidase 3 OS=Homo sapiens GN=GPX3 PE=1 SV=2	GPX3_HUMAN	26	8.29	Homo sapiens	0	0	0	0	0	0	0	0	0	0	2	2	2	2	3	0	0	0	0	0	0	0	0	0	0	0.088	0.088	0.088	0.088	0.15	0	0	0	0	0	0	0	0	0	0	2	2	2	2
241	Protein disulfide-isomerase A3 OS=Homo sapiens GN=PDIA3 PE=1 SV=4	PDIA3_HUMAN	57	6.28	Homo sapiens	0	3	2	0	0	0	2	2	2	0	0	0	0	0	0	0	0.073	0.051	0	0	0	0.044	0.044	0.044	0	0	0	0	0	0	0	3	2	0	0	0	2	2	2	0	0	0	0	0
242	Proteoglycan 4 OS=Homo sapiens GN=PRG4 PE=1 SV=2	PRG4_HUMAN	151	10.16	Homo sapiens	0	0	0	0	0	0	0	0	0	0	0	0	0	2	0	0	0	0	0	0	0	0	0	0	0	0	0	0	0.013	0	0	0	0	0	0	0	0	0	0	0	0	0	0	2
243	Moesin OS=Homo sapiens GN=MSN PE=1 SV=3	MOES_HUMAN	68	6.32	Homo sapiens	2	0	0	0	0	0	0	2	3	0	0	0	0	0	0	0.038	0	0	0	0	0	0	0.038	0.055	0	0	0	0	0	0	2	0	0	0	0	0	0	2	3	0	0	0	0	0
244	Complement C1q subcomponent subunit A OS=Homo sapiens GN=C1QA PE=1 SV=2	C1QA_HUMAN	26	9.45	Homo sapiens	0	0	0	0	0	0	0	0	0	0	0	0	0	0	0	0	0	0	0	0	0	0	0	0	0	0	0	0	0	0	0	0	0	0	0	0	0	0	0	0	0	0	0	0
245	Extracellular matrix protein 1 OS=Homo sapiens GN=ECM1 PE=1 SV=2	ECM1_HUMAN	61	6.7	Homo sapiens	0	0	0	0	0	0	0	0	0	0	0	0	0	0	0	0	0	0	0	0	0	0	0	0	0	0	0	0	0	0	0	0	0	0	0	0	0	0	0	0	0	0	0	0
246	Ig kappa chain V-III region VG (Fragment) OS=Homo sapiens PE=1 SV=1	KV309_HUMAN	13	4.59	Homo sapiens	0	2	2	0	0	0	0	0	0	0	0	0	0	0	0	0	0.26	0.23	0	0	0	0	0	0	0	0	0	0	0	0	0	2	2	0	0	0	0	0	0	0	0	0	0	0
247	Adenylyl cyclase-associated protein 1 OS=Homo sapiens GN=CAP1 PE=1 SV=5	CAP1_HUMAN	52	8.2	Homo sapiens	7	5	4	0	0	0	5	4	3	0	0	0	0	0	0	0.17	0.097	0.097	0	0	0	0.11	0.076	0.057	0	0	0	0	0	0	7	5	4	0	0	0	5	4	3	0	0	0	0	0
248	Keratin, type II cytoskeletal 6B OS=Homo sapiens GN=KRT6B PE=1 SV=5	K2C6B_HUMAN	60	8.16	Homo sapiens	0	0	0	0	0	0	35	44	39	0	0	0	0	38	42	0	0	0	0	0	0	0.42	0.49	0.43	0	0	0	0	0.4	0.4	0	0	0	0	0	0	5	6	6	0	0	0	0	2
249	CD9 antigen OS=Homo sapiens GN=CD9 PE=1 SV=4	CD9_HUMAN	25	7.19	Homo sapiens	0	0	0	0	0	0	0	0	0	0	0	0	0	0	0	0	0	0	0	0	0	0	0	0	0	0	0	0	0	0	0	0	0	0	0	0	0	0	0	0	0	0	0	0
250	Chromogranin-A OS=Homo sapiens GN=CHGA PE=1 SV=7	CMGA_HUMAN	51	4.27	Homo sapiens	0	0	0	0	0	0	0	0	0	0	0	0	0	0	0	0	0	0	0	0	0	0	0	0	0	0	0	0	0	0	0	0	0	0	0	0	0	0	0	0	0	0	0	0
251	Ig heavy chain V-III region BRO OS=Homo sapiens PE=1 SV=1	HV305_HUMAN	13	6.49	Homo sapiens	0	0	0	0	0	0	0	0	0	0	0	0	0	0	0	0	0	0	0	0	0	0	0	0	0	0	0	0	0	0	0	0	0	0	0	0	0	0	0	0	0	0	0	0
252	Coagulation factor VII OS=Homo sapiens GN=F7 PE=1 SV=1	FA7_HUMAN	52	7.23	Homo sapiens	2	2	0	3	3	4	4	0	2	0	0	0	0	0	0	0.075	0.075	0	0.097	0.075	0.12	0.17	0	0.064	0	0	0	0	0	0	2	2	0	3	2	4	4	0	2	0	0	0	0	0
253	Collectin-10 OS=Homo sapiens GN=COLEC10 PE=2 SV=2	COL10_HUMAN	31	7.39	Homo sapiens	4	0	4	4	6	6	4	6	4	2	2	2	2	3	2	0.15	0	0.15	0.14	0.18	0.18	0.15	0.24	0.15	0.061	0.061	0.061	0.061	0.061	0.061	4	0	4	4	5	5	4	5	4	2	2	2	2	3
254	Guanine nucleotide-binding protein G(i) subunit alpha-2 OS=Homo sapiens GN=GNAI2 PE=1 SV=3	GNAI2_HUMAN	40	5.2	Homo sapiens	0	0	0	0	0	0	0	0	0	0	0	0	0	0	0	0	0	0	0	0	0	0	0	0	0	0	0	0	0	0	0	0	0	0	0	0	0	0	0	0	0	0	0	0
255	Azurocidin OS=Homo sapiens GN=AZU1 PE=1 SV=3	CAP7_HUMAN	27	9.65	Homo sapiens	0	0	0	0	0	0	0	0	0	0	0	0	0	0	0	0	0	0	0	0	0	0	0	0	0	0	0	0	0	0	0	0	0	0	0	0	0	0	0	0	0	0	0	0
256	Pigment epithelium-derived factor OS=Homo sapiens GN=SERPINF1 PE=1 SV=4	PEDF_HUMAN	46	6.33	Homo sapiens	0	0	0	0	0	0	0	0	0	0	0	0	0	0	0	0	0	0	0	0	0	0	0	0	0	0	0	0	0	0	0	0	0	0	0	0	0	0	0	0	0	0	0	0
257	ATP synthase subunit alpha, mitochondrial OS=Homo sapiens GN=ATP5A1 PE=1 SV=1	ATPA_HUMAN	60	9.56	Homo sapiens	2	2	0	0	0	0	2	3	2	0	0	0	0	0	0	0.047	0.04	0	0	0	0	0.047	0.074	0.047	0	0	0	0	0	0	2	2	0	0	0	0	2	3	2	0	0	0	0	0
258	Keratin, type II cuticular Hb6 OS=Homo sapiens GN=KRT86 PE=1 SV=1	KRT86_HUMAN	53	5.35	Homo sapiens	0	0	0	0	0	0	0	0	0	0	0	0	0	0	0	0	0	0	0	0	0	0	0	0	0	0	0	0	0	0	0	0	0	0	0	0	0	0	0	0	0	0	0	0
259	Sarcoplasmic/endoplasmic reticulum calcium ATPase 3 OS=Homo sapiens GN=ATP2A3 PE=1 SV=2	AT2A3_HUMAN	114	5.26	Homo sapiens	0	2	3	0	0	0	0	2	0	0	0	0	0	0	0	0	0.029	0.04	0	0	0	0	0.025	0	0	0	0	0	0	0	0	2	3	0	0	0	0	2	0	0	0	0	0	0
260	Ig kappa chain V-II region RPMI 6410 OS=Homo sapiens PE=4 SV=1	KV206_HUMAN	15	9.53	Homo sapiens	0	0	0	0	0	0	0	0	0	0	0	0	0	0	0	0	0	0	0	0	0	0	0	0	0	0	0	0	0	0	0	0	0	0	0	0	0	0	0	0	0	0	0	0
261	Ig lambda chain V-I region WAH OS=Homo sapiens PE=1 SV=1	LV106_HUMAN	12	6.46	Homo sapiens	0	0	0	0	0	0	0	0	0	0	0	0	0	0	0	0	0	0	0	0	0	0	0	0	0	0	0	0	0	0	0	0	0	0	0	0	0	0	0	0	0	0	0	0
262	Tropomyosin alpha-3 chain OS=Homo sapiens GN=TPM3 PE=1 SV=2	TPM3_HUMAN	33	4.38	Homo sapiens	8	0	0	0	0	0	0	0	0	0	0	0	0	0	0	0.28	0	0	0	0	0	0	0	0	0	0	0	0	0	0	2	0	0	0	0	0	0	0	0	0	0	0	0	0
263	Coagulation factor XII OS=Homo sapiens GN=F12 PE=1 SV=3	FA12_HUMAN	68	7.76	Homo sapiens	0	0	0	0	0	0	0	0	0	0	0	0	0	0	0	0	0	0	0	0	0	0	0	0	0	0	0	0	0	0	0	0	0	0	0	0	0	0	0	0	0	0	0	0
264	Calmodulin-like protein 5 OS=Homo sapiens GN=CALML5 PE=1 SV=2	CALL5_HUMAN	16	4.05	Homo sapiens	0	0	0	0	2	0	5	5	7	0	0	0	0	0	0	0	0	0	0	0.15	0	0.45	0.33	0.47	0	0	0	0	0	0	0	0	0	0	2	0	5	5	7	0	0	0	0	0
265	Thymosin beta-4 OS=Homo sapiens GN=TMSB4X PE=1 SV=2	TYB4_HUMAN	5	4.72	Homo sapiens	3	2	0	0	0	0	0	0	0	0	0	0	0	0	0	0.36	0.32	0	0	0	0	0	0	0	0	0	0	0	0	0	3	2	0	0	0	0	0	0	0	0	0	0	0	0
266	Lysozyme C OS=Homo sapiens GN=LYZ PE=1 SV=1	LYSC_HUMAN	17	9.35	Homo sapiens	0	0	0	0	0	0	0	0	0	0	0	0	0	0	0	0	0	0	0	0	0	0	0	0	0	0	0	0	0	0	0	0	0	0	0	0	0	0	0	0	0	0	0	0
267	14-3-3 protein gamma OS=Homo sapiens GN=YWHAG PE=1 SV=2	1433G_HUMAN	28	4.52	Homo sapiens	0	0	0	3	3	3	0	5	5	0	0	0	0	0	0	0	0	0	0.13	0.13	0.13	0	0.19	0.13	0	0	0	0	0	0	0	0	0	2	2	2	0	3	3	0	0	0	0	0
268	CD59 glycoprotein OS=Homo sapiens GN=CD59 PE=1 SV=1	CD59_HUMAN	14	6.47	Homo sapiens	0	0	0	0	0	0	0	0	0	0	0	0	0	0	0	0	0	0	0	0	0	0	0	0	0	0	0	0	0	0	0	0	0	0	0	0	0	0	0	0	0	0	0	0
269	Junction plakoglobin OS=Homo sapiens GN=JUP PE=1 SV=3	PLAK_HUMAN	82	6.05	Homo sapiens	0	0	0	0	0	0	5	4	5	0	0	0	0	2	0	0	0	0	0	0	0	0.094	0.075	0.094	0	0	0	0	0.04	0	0	0	0	0	0	0	5	4	5	0	0	0	0	2
270	Annexin A1 OS=Homo sapiens GN=ANXA1 PE=1 SV=2	ANXA1_HUMAN	39	7.04	Homo sapiens	0	0	0	0	0	0	4	4	4	0	0	0	0	0	0	0	0	0	0	0	0	0.16	0.14	0.13	0	0	0	0	0	0	0	0	0	0	0	0	4	4	4	0	0	0	0	0
271	Guanine nucleotide-binding protein G(I)/G(S)/G(T) subunit beta-1 OS=Homo sapiens GN=GNB1 PE=1 SV=3	GBB1_HUMAN	37	5.85	Homo sapiens	2	0	0	0	0	0	3	4	2	0	0	0	0	0	0	0.091	0	0	0	0	0	0.13	0.13	0.091	0	0	0	0	0	0	2	0	0	0	0	0	3	3	2	0	0	0	0	0
272	Filaggrin OS=Homo sapiens GN=FLG PE=1 SV=3	FILA_HUMAN	435	9.6	Homo sapiens	0	0	0	0	0	0	0	0	2	3	2	2	2	0	0	0	0	0	0	0	0	0	0	0.012	0.012	0.0089	0.0089	0.0089	0	0	0	0	0	0	0	0	0	0	2	3	2	2	2	0
273	Aggrecan core protein OS=Homo sapiens GN=ACAN PE=1 SV=2	PGCA_HUMAN	250	3.82	Homo sapiens	0	0	0	0	2	2	0	0	0	0	0	0	0	0	0	0	0	0	0	0.011	0.011	0	0	0	0	0	0	0	0	0	0	0	0	0	2	2	0	0	0	0	0	0	0	0
274	Protein MENT OS=Homo sapiens GN=MENT PE=2 SV=1	MENT_HUMAN	37	8.67	Homo sapiens	0	0	0	0	0	0	0	0	0	0	0	0	0	0	0	0	0	0	0	0	0	0	0	0	0	0	0	0	0	0	0	0	0	0	0	0	0	0	0	0	0	0	0	0
275	Leucine-rich alpha-2-glycoprotein OS=Homo sapiens GN=LRG1 PE=1 SV=2	A2GL_HUMAN	38	6.95	Homo sapiens	0	0	0	0	0	0	0	0	0	0	0	0	0	0	0	0	0	0	0	0	0	0	0	0	0	0	0	0	0	0	0	0	0	0	0	0	0	0	0	0	0	0	0	0
276	14-3-3 protein eta OS=Homo sapiens GN=YWHAH PE=1 SV=4	1433F_HUMAN	28	4.47	Homo sapiens	0	0	0	0	0	0	0	0	0	0	0	0	0	0	0	0	0	0	0	0	0	0	0	0	0	0	0	0	0	0	0	0	0	0	0	0	0	0	0	0	0	0	0	0
277	HLA class I histocompatibility antigen, A-2 alpha chain OS=Homo sapiens GN=HLA-A PE=1 SV=1	1A02_HUMAN	41	7	Homo sapiens	0	0	0	0	0	0	0	5	4	0	0	0	0	0	0	0	0	0	0	0	0	0	0.18	0.11	0	0	0	0	0	0	0	0	0	0	0	0	0	2	3	0	0	0	0	0
278	Coronin-1C OS=Homo sapiens GN=CORO1C PE=1 SV=1	COR1C_HUMAN	53	7.09	Homo sapiens	2	3	0	0	0	0	0	0	0	0	0	0	0	0	0	0.042	0.059	0	0	0	0	0	0	0	0	0	0	0	0	0	2	3	0	0	0	0	0	0	0	0	0	0	0	0
279	PDZ and LIM domain protein 1 OS=Homo sapiens GN=PDLIM1 PE=1 SV=4	PDLI1_HUMAN	36	7.03	Homo sapiens	0	0	0	0	0	0	0	0	2	0	0	0	0	0	0	0	0	0	0	0	0	0	0	0.085	0	0	0	0	0	0	0	0	0	0	0	0	0	0	2	0	0	0	0	0
280	Calumenin OS=Homo sapiens GN=CALU PE=1 SV=2	CALU_HUMAN	37	4.23	Homo sapiens	0	0	0	0	0	0	0	0	0	0	0	0	0	0	0	0	0	0	0	0	0	0	0	0	0	0	0	0	0	0	0	0	0	0	0	0	0	0	0	0	0	0	0	0
281	Suprabasin OS=Homo sapiens GN=SBSN PE=1 SV=2	SBSN_HUMAN	61	7.01	Homo sapiens	0	0	0	0	2	2	2	2	2	0	0	0	0	0	0	0	0	0	0	0.061	0.061	0.061	0.061	0.061	0	0	0	0	0	0	0	0	0	0	2	2	2	2	2	0	0	0	0	0
282	Histone H3.3 OS=Homo sapiens GN=H3F3A PE=1 SV=2	H33_HUMAN	15	11.83	Homo sapiens	0	0	0	0	0	0	0	0	0	0	0	0	0	0	0	0	0	0	0	0	0	0	0	0	0	0	0	0	0	0	0	0	0	0	0	0	0	0	0	0	0	0	0	0
283	Platelet glycoprotein 4 OS=Homo sapiens GN=CD36 PE=1 SV=2	CD36_HUMAN	53	8.06	Homo sapiens	5	0	2	0	0	0	2	3	2	0	0	0	0	0	0	0.083	0	0.04	0	0	0	0.053	0.093	0.044	0	0	0	0	0	0	5	0	2	0	0	0	2	3	2	0	0	0	0	0
284	Chloride intracellular channel protein 1 OS=Homo sapiens GN=CLIC1 PE=1 SV=4	CLIC1_HUMAN	27	4.82	Homo sapiens	2	0	0	2	0	0	2	0	2	0	0	0	0	0	0	0.11	0	0	0.11	0	0	0.11	0	0.11	0	0	0	0	0	0	2	0	0	2	0	0	2	0	2	0	0	0	0	0
285	Alpha-actinin-4 OS=Homo sapiens GN=ACTN4 PE=1 SV=2	ACTN4_HUMAN	105	5.12	Homo sapiens	0	0	0	0	0	0	6	0	0	0	0	0	0	0	0	0	0	0	0	0	0	0.082	0	0	0	0	0	0	0	0	0	0	0	0	0	0	2	0	0	0	0	0	0	0
286	Transforming growth factor-beta-induced protein ig-h3 OS=Homo sapiens GN=TGFBI PE=1 SV=1	BGH3_HUMAN	75	7.77	Homo sapiens	0	0	0	0	0	0	0	0	0	0	0	0	0	0	0	0	0	0	0	0	0	0	0	0	0	0	0	0	0	0	0	0	0	0	0	0	0	0	0	0	0	0	0	0
287	Complement factor H-related protein 4 OS=Homo sapiens GN=CFHR4 PE=1 SV=3	FHR4_HUMAN	65	4.58	Homo sapiens	0	0	0	0	0	0	0	0	0	0	0	0	0	0	0	0	0	0	0	0	0	0	0	0	0	0	0	0	0	0	0	0	0	0	0	0	0	0	0	0	0	0	0	0
288	Kallistatin OS=Homo sapiens GN=SERPINA4 PE=1 SV=3	KAIN_HUMAN	49	7.85	Homo sapiens	0	0	0	0	0	0	0	0	0	0	0	0	0	2	2	0	0	0	0	0	0	0	0	0	0	0	0	0	0.042	0.042	0	0	0	0	0	0	0	0	0	0	0	0	0	2
289	Monocyte differentiation antigen CD14 OS=Homo sapiens GN=CD14 PE=1 SV=2	CD14_HUMAN	40	6.16	Homo sapiens	0	0	0	0	0	0	0	0	0	0	0	0	0	0	0	0	0	0	0	0	0	0	0	0	0	0	0	0	0	0	0	0	0	0	0	0	0	0	0	0	0	0	0	0
290	Prenylcysteine oxidase 1 OS=Homo sapiens GN=PCYOX1 PE=1 SV=3	PCYOX_HUMAN	57	6.1	Homo sapiens	0	0	0	0	0	0	0	0	0	2	2	0	0	3	2	0	0	0	0	0	0	0	0	0	0.048	0.048	0	0	0.048	0.048	0	0	0	0	0	0	0	0	0	2	2	0	0	2
291	F-actin-capping protein subunit beta OS=Homo sapiens GN=CAPZB PE=1 SV=4	CAPZB_HUMAN	31	5.23	Homo sapiens	0	2	0	0	0	0	0	0	0	0	0	0	0	0	0	0	0.1	0	0	0	0	0	0	0	0	0	0	0	0	0	0	2	0	0	0	0	0	0	0	0	0	0	0	0
292	Hemoglobin subunit delta OS=Homo sapiens GN=HBD PE=1 SV=2	HBD_HUMAN	16	8.26	Homo sapiens	0	0	0	30	23	26	0	0	0	0	0	0	0	0	0	0	0	0	0.73	0.76	0.63	0	0	0	0	0	0	0	0	0	0	0	0	4	4	3	0	0	0	0	0	0	0	0
293	Desmoglein-1 OS=Homo sapiens GN=DSG1 PE=1 SV=2	DSG1_HUMAN	114	4.66	Homo sapiens	0	0	0	0	0	0	0	0	0	0	0	0	0	0	0	0	0	0	0	0	0	0	0	0	0	0	0	0	0	0	0	0	0	0	0	0	0	0	0	0	0	0	0	0
294	Myosin regulatory light polypeptide 9 OS=Homo sapiens GN=MYL9 PE=1 SV=4	MYL9_HUMAN	20	4.54	Homo sapiens	0	0	0	0	0	0	0	0	0	0	0	0	0	0	0	0	0	0	0	0	0	0	0	0	0	0	0	0	0	0	0	0	0	0	0	0	0	0	0	0	0	0	0	0
295	Cytochrome b-245 heavy chain OS=Homo sapiens GN=CYBB PE=1 SV=2	CY24B_HUMAN	65	8.76	Homo sapiens	0	0	0	0	0	0	0	0	0	0	0	0	0	0	0	0	0	0	0	0	0	0	0	0	0	0	0	0	0	0	0	0	0	0	0	0	0	0	0	0	0	0	0	0
296	Transitional endoplasmic reticulum ATPase OS=Homo sapiens GN=VCP PE=1 SV=4	TERA_HUMAN	89	4.89	Homo sapiens	0	0	0	0	0	0	0	0	0	0	0	0	0	0	0	0	0	0	0	0	0	0	0	0	0	0	0	0	0	0	0	0	0	0	0	0	0	0	0	0	0	0	0	0
297	Eosinophil peroxidase OS=Homo sapiens GN=EPX PE=1 SV=2	PERE_HUMAN	81	10.81	Homo sapiens	0	0	0	0	0	0	0	0	0	0	0	0	0	0	0	0	0	0	0	0	0	0	0	0	0	0	0	0	0	0	0	0	0	0	0	0	0	0	0	0	0	0	0	0
298	Zinc-alpha-2-glycoprotein OS=Homo sapiens GN=AZGP1 PE=1 SV=2	ZA2G_HUMAN	34	5.92	Homo sapiens	0	0	0	0	0	0	0	2	0	0	0	2	0	0	0	0	0	0	0	0	0	0	0.084	0	0	0	0.074	0	0	0	0	0	0	0	0	0	0	2	0	0	0	2	0	0
299	Solute carrier family 2, facilitated glucose transporter member 3 OS=Homo sapiens GN=SLC2A3 PE=2 SV=1	GTR3_HUMAN	54	7.24	Homo sapiens	0	0	0	0	0	0	0	0	0	0	0	0	0	0	0	0	0	0	0	0	0	0	0	0	0	0	0	0	0	0	0	0	0	0	0	0	0	0	0	0	0	0	0	0
300	Myosin regulatory light chain 12A OS=Homo sapiens GN=MYL12A PE=1 SV=2	ML12A_HUMAN	20	4.4	Homo sapiens	2	0	0	0	0	0	2	2	3	0	0	0	0	0	0	0.064	0	0	0	0	0	0.064	0.064	0.064	0	0	0	0	0	0	2	0	0	0	0	0	2	2	3	0	0	0	0	0
301	Pentraxin-related protein PTX3 OS=Homo sapiens GN=PTX3 PE=1 SV=3	PTX3_HUMAN	42	4.67	Homo sapiens	0	0	0	0	0	0	0	0	0	0	0	0	0	0	0	0	0	0	0	0	0	0	0	0	0	0	0	0	0	0	0	0	0	0	0	0	0	0	0	0	0	0	0	0
302	Reelin OS=Homo sapiens GN=RELN PE=1 SV=3	RELN_HUMAN	388	5.74	Homo sapiens	0	0	0	0	0	0	0	0	0	0	0	0	0	0	0	0	0	0	0	0	0	0	0	0	0	0	0	0	0	0	0	0	0	0	0	0	0	0	0	0	0	0	0	0
303	Dickkopf-related protein 3 OS=Homo sapiens GN=DKK3 PE=1 SV=2	DKK3_HUMAN	38	4.3	Homo sapiens	0	0	0	0	0	0	2	0	0	0	0	0	0	0	0	0	0	0	0	0	0	0.089	0	0	0	0	0	0	0	0	0	0	0	0	0	0	2	0	0	0	0	0	0	0
304	HLA class I histocompatibility antigen, B-15 alpha chain OS=Homo sapiens GN=HLA-B PE=1 SV=2	1B15_HUMAN	40	6.25	Homo sapiens	0	0	0	0	0	0	0	0	0	0	0	0	0	0	0	0	0	0	0	0	0	0	0	0	0	0	0	0	0	0	0	0	0	0	0	0	0	0	0	0	0	0	0	0
305	Basement membrane-specific heparan sulfate proteoglycan core protein OS=Homo sapiens GN=HSPG2 PE=1 SV=4	PGBM_HUMAN	469	6.49	Homo sapiens	0	0	0	0	0	0	0	0	0	0	0	0	0	0	0	0	0	0	0	0	0	0	0	0	0	0	0	0	0	0	0	0	0	0	0	0	0	0	0	0	0	0	0	0
306	Complement C2 OS=Homo sapiens GN=C2 PE=1 SV=2	CO2_HUMAN	83	7.43	Homo sapiens	0	0	0	0	0	0	0	0	0	0	0	0	0	0	0	0	0	0	0	0	0	0	0	0	0	0	0	0	0	0	0	0	0	0	0	0	0	0	0	0	0	0	0	0
307	Tropomyosin alpha-1 chain OS=Homo sapiens GN=TPM1 PE=1 SV=2	TPM1_HUMAN	33	4.39	Homo sapiens	9	0	0	0	0	0	0	0	0	0	0	0	0	0	0	0.29	0	0	0	0	0	0	0	0	0	0	0	0	0	0	4	0	0	0	0	0	0	0	0	0	0	0	0	0
308	Ficolin-2 OS=Homo sapiens GN=FCN2 PE=1 SV=2	FCN2_HUMAN	34	6.77	Homo sapiens	0	0	0	0	0	0	0	0	0	0	0	0	0	0	0	0	0	0	0	0	0	0	0	0	0	0	0	0	0	0	0	0	0	0	0	0	0	0	0	0	0	0	0	0
309	Bone marrow proteoglycan OS=Homo sapiens GN=PRG2 PE=1 SV=2	PRG2_HUMAN	25	6.75	Homo sapiens	0	0	0	0	0	0	0	0	0	0	0	0	0	0	0	0	0	0	0	0	0	0	0	0	0	0	0	0	0	0	0	0	0	0	0	0	0	0	0	0	0	0	0	0
310	Zyxin OS=Homo sapiens GN=ZYX PE=1 SV=1	ZYX_HUMAN	61	6.65	Homo sapiens	0	0	0	0	0	0	2	0	0	0	0	0	0	0	0	0	0	0	0	0	0	0.059	0	0	0	0	0	0	0	0	0	0	0	0	0	0	2	0	0	0	0	0	0	0
311	Protein disulfide-isomerase OS=Homo sapiens GN=P4HB PE=1 SV=3	PDIA1_HUMAN	57	4.49	Homo sapiens	0	0	0	0	0	0	0	0	0	0	0	0	0	0	0	0	0	0	0	0	0	0	0	0	0	0	0	0	0	0	0	0	0	0	0	0	0	0	0	0	0	0	0	0
312	Mannose-binding protein C OS=Homo sapiens GN=MBL2 PE=1 SV=2	MBL2_HUMAN	26	5.14	Homo sapiens	2	0	0	0	2	0	0	0	0	0	0	0	0	0	0	0.085	0	0	0	0.085	0	0	0	0	0	0	0	0	0	0	2	0	0	0	2	0	0	0	0	0	0	0	0	0
313	Carcinoembryonic antigen-related cell adhesion molecule 8 OS=Homo sapiens GN=CEACAM8 PE=1 SV=2	CEAM8_HUMAN	38	7.45	Homo sapiens	0	0	0	0	0	0	0	0	0	0	0	0	0	0	0	0	0	0	0	0	0	0	0	0	0	0	0	0	0	0	0	0	0	0	0	0	0	0	0	0	0	0	0	0
314	Tubulin beta chain OS=Homo sapiens GN=TUBB PE=1 SV=2	TBB5_HUMAN	50	4.52	Homo sapiens	16	15	0	0	0	0	16	15	20	0	0	0	0	0	0	0.35	0.36	0	0	0	0	0.43	0.39	0.44	0	0	0	0	0	0	2	2	0	0	0	0	3	3	4	0	0	0	0	0
315	Triosephosphate isomerase OS=Homo sapiens GN=TPI1 PE=1 SV=3	TPIS_HUMAN	31	5.72	Homo sapiens	0	0	0	0	0	0	4	3	3	0	0	0	0	0	0	0	0	0	0	0	0	0.17	0.14	0.13	0	0	0	0	0	0	0	0	0	0	0	0	4	3	3	0	0	0	0	0
316	Keratin, type II cuticular Hb2 OS=Homo sapiens GN=KRT82 PE=3 SV=3	KRT82_HUMAN	57	6.72	Homo sapiens	0	0	0	0	0	0	0	0	0	0	0	0	0	0	0	0	0	0	0	0	0	0	0	0	0	0	0	0	0	0	0	0	0	0	0	0	0	0	0	0	0	0	0	0
317	Fatty acid-binding protein, epidermal OS=Homo sapiens GN=FABP5 PE=1 SV=3	FABP5_HUMAN	15	7.05	Homo sapiens	0	0	0	0	0	0	8	12	7	0	0	0	0	0	2	0	0	0	0	0	0	0.66	0.54	0.65	0	0	0	0	0	0.17	0	0	0	0	0	0	8	10	7	0	0	0	0	0
318	Actin-related protein 3 OS=Homo sapiens GN=ACTR3 PE=1 SV=3	ARP3_HUMAN	47	5.69	Homo sapiens	0	0	0	0	0	0	0	0	0	0	0	0	0	0	0	0	0	0	0	0	0	0	0	0	0	0	0	0	0	0	0	0	0	0	0	0	0	0	0	0	0	0	0	0
319	Superoxide dismutase [Mn], mitochondrial OS=Homo sapiens GN=SOD2 PE=1 SV=2	SODM_HUMAN	25	8.45	Homo sapiens	2	0	2	0	0	0	2	2	0	0	0	0	0	0	0	0.13	0	0.099	0	0	0	0.13	0.13	0	0	0	0	0	0	0	2	0	2	0	0	0	2	2	0	0	0	0	0	0
320	Vasodilator-stimulated phosphoprotein OS=Homo sapiens GN=VASP PE=1 SV=3	VASP_HUMAN	40	9.41	Homo sapiens	2	0	0	0	0	0	0	0	0	0	0	0	0	0	0	0.058	0	0	0	0	0	0	0	0	0	0	0	0	0	0	2	0	0	0	0	0	0	0	0	0	0	0	0	0
321	Microtubule-associated protein RP/EB family member 2 OS=Homo sapiens GN=MAPRE2 PE=1 SV=1	MARE2_HUMAN	37	5.28	Homo sapiens	2	0	0	0	0	0	0	2	0	0	0	0	0	0	0	0.11	0	0	0	0	0	0	0.11	0	0	0	0	0	0	0	2	0	0	0	0	0	0	2	0	0	0	0	0	0
322	Ig heavy chain V-III region TUR OS=Homo sapiens PE=1 SV=1	HV318_HUMAN	12	10.12	Homo sapiens	0	0	0	0	0	0	0	0	0	0	0	0	0	0	0	0	0	0	0	0	0	0	0	0	0	0	0	0	0	0	0	0	0	0	0	0	0	0	0	0	0	0	0	0
323	Annexin A2 OS=Homo sapiens GN=ANXA2 PE=1 SV=2	ANXA2_HUMAN	39	7.91	Homo sapiens	0	0	0	0	0	0	14	9	11	0	0	0	0	0	0	0	0	0	0	0	0	0.48	0.36	0.32	0	0	0	0	0	0	0	0	0	0	0	0	14	9	11	0	0	0	0	0
324	Ig lambda chain V-III region SH OS=Homo sapiens PE=1 SV=1	LV301_HUMAN	11	6.5	Homo sapiens	0	0	0	0	0	0	0	0	0	0	0	2	0	0	0	0	0	0	0	0	0	0	0	0	0	0	0.25	0	0	0	0	0	0	0	0	0	0	0	0	0	0	2	0	0
325	Alpha-enolase OS=Homo sapiens GN=ENO1 PE=1 SV=2	ENOA_HUMAN	47	7.46	Homo sapiens	0	0	0	0	0	0	3	3	2	0	0	0	0	0	0	0	0	0	0	0	0	0.09	0.12	0.058	0	0	0	0	0	0	0	0	0	0	0	0	3	3	2	0	0	0	0	0
326	14-3-3 protein epsilon OS=Homo sapiens GN=YWHAE PE=1 SV=1	1433E_HUMAN	29	4.36	Homo sapiens	0	2	2	0	0	3	0	5	4	0	0	0	0	0	0	0	0.09	0.09	0	0	0.12	0	0.19	0.15	0	0	0	0	0	0	0	2	2	0	0	2	0	3	2	0	0	0	0	0
327	Erythrocyte membrane protein band 4.2 OS=Homo sapiens GN=EPB42 PE=1 SV=3	EPB42_HUMAN	77	8.17	Homo sapiens	0	0	0	0	0	0	0	0	0	0	0	0	0	0	0	0	0	0	0	0	0	0	0	0	0	0	0	0	0	0	0	0	0	0	0	0	0	0	0	0	0	0	0	0
328	Ras-related protein Rab-10 OS=Homo sapiens GN=RAB10 PE=1 SV=1	RAB10_HUMAN	23	8.61	Homo sapiens	0	2	2	0	0	0	3	0	0	0	0	0	0	0	0	0	0.12	0.12	0	0	0	0.17	0	0	0	0	0	0	0	0	0	2	2	0	0	0	2	0	0	0	0	0	0	0
329	Proteasome subunit alpha type-6 OS=Homo sapiens GN=PSMA6 PE=1 SV=1	PSA6_HUMAN	27	6.74	Homo sapiens	0	0	0	0	0	0	2	2	0	0	0	0	0	0	0	0	0	0	0	0	0	0.12	0.093	0	0	0	0	0	0	0	0	0	0	0	0	0	2	2	0	0	0	0	0	0
330	Versican core protein OS=Homo sapiens GN=VCAN PE=1 SV=3	CSPG2_HUMAN	373	4.15	Homo sapiens	0	0	0	0	0	0	0	0	0	0	0	0	0	0	0	0	0	0	0	0	0	0	0	0	0	0	0	0	0	0	0	0	0	0	0	0	0	0	0	0	0	0	0	0
331	EH domain-containing protein 3 OS=Homo sapiens GN=EHD3 PE=1 SV=2	EHD3_HUMAN	61	6.53	Homo sapiens	0	0	0	0	0	0	0	0	0	0	0	0	0	0	0	0	0	0	0	0	0	0	0	0	0	0	0	0	0	0	0	0	0	0	0	0	0	0	0	0	0	0	0	0
332	Serpin B3 OS=Homo sapiens GN=SERPINB3 PE=1 SV=2	SPB3_HUMAN	45	6.81	Homo sapiens	0	0	0	0	0	0	11	12	9	0	0	0	0	0	0	0	0	0	0	0	0	0.32	0.28	0.31	0	0	0	0	0	0	0	0	0	0	0	0	10	11	9	0	0	0	0	0
333	Annexin A3 OS=Homo sapiens GN=ANXA3 PE=1 SV=3	ANXA3_HUMAN	36	5.71	Homo sapiens	0	0	0	0	0	0	0	0	0	0	0	0	0	0	0	0	0	0	0	0	0	0	0	0	0	0	0	0	0	0	0	0	0	0	0	0	0	0	0	0	0	0	0	0
334	Tenascin OS=Homo sapiens GN=TNC PE=1 SV=3	TENA_HUMAN	241	4.52	Homo sapiens	0	0	0	0	0	0	0	0	0	0	0	0	0	0	0	0	0	0	0	0	0	0	0	0	0	0	0	0	0	0	0	0	0	0	0	0	0	0	0	0	0	0	0	0
335	Platelet endothelial cell adhesion molecule OS=Homo sapiens GN=PECAM1 PE=1 SV=1	PECA1_HUMAN	83	6.99	Homo sapiens	0	2	0	0	0	0	0	0	0	0	0	0	0	0	0	0	0.043	0	0	0	0	0	0	0	0	0	0	0	0	0	0	2	0	0	0	0	0	0	0	0	0	0	0	0
336	Collagen alpha-1(XVIII) chain OS=Homo sapiens GN=COL18A1 PE=1 SV=5	COIA1_HUMAN	178	5.89	Homo sapiens	0	0	0	0	0	0	0	0	0	0	2	0	0	0	0	0	0	0	0	0	0	0	0	0	0	0.008	0	0	0	0	0	0	0	0	0	0	0	0	0	0	2	0	0	0
337	Biotinidase OS=Homo sapiens GN=BTD PE=1 SV=2	BTD_HUMAN	61	6.22	Homo sapiens	0	0	0	0	0	0	0	0	0	0	0	0	0	2	0	0	0	0	0	0	0	0	0	0	0	0	0	0	0.042	0	0	0	0	0	0	0	0	0	0	0	0	0	0	2
338	Angiopoietin-related protein 3 OS=Homo sapiens GN=ANGPTL3 PE=1 SV=1	ANGL3_HUMAN	54	6.68	Homo sapiens	0	0	0	2	0	0	0	0	0	0	0	0	0	0	0	0	0	0	0.067	0	0	0	0	0	0	0	0	0	0	0	0	0	0	2	0	0	0	0	0	0	0	0	0	0
339	Ras suppressor protein 1 OS=Homo sapiens GN=RSU1 PE=1 SV=3	RSU1_HUMAN	32	9.16	Homo sapiens	0	0	0	0	0	0	0	0	0	0	0	0	0	0	0	0	0	0	0	0	0	0	0	0	0	0	0	0	0	0	0	0	0	0	0	0	0	0	0	0	0	0	0	0
340	Keratinocyte proline-rich protein OS=Homo sapiens GN=KPRP PE=1 SV=1	KPRP_HUMAN	64	8.29	Homo sapiens	0	0	0	0	0	0	0	0	2	0	0	0	0	0	0	0	0	0	0	0	0	0	0	0.059	0	0	0	0	0	0	0	0	0	0	0	0	0	0	2	0	0	0	0	0
341	Proteasome subunit alpha type-1 OS=Homo sapiens GN=PSMA1 PE=1 SV=1	PSA1_HUMAN	30	6.6	Homo sapiens	2	0	0	0	0	0	0	0	0	0	0	0	0	0	0	0.08	0	0	0	0	0	0	0	0	0	0	0	0	0	0	2	0	0	0	0	0	0	0	0	0	0	0	0	0
342	Protein disulfide-isomerase A4 OS=Homo sapiens GN=PDIA4 PE=1 SV=2	PDIA4_HUMAN	73	4.7	Homo sapiens	0	3	0	3	0	0	0	0	0	0	0	0	0	0	0	0	0.034	0	0.034	0	0	0	0	0	0	0	0	0	0	0	0	3	0	3	0	0	0	0	0	0	0	0	0	0
343	Ig heavy chain V-II region ARH-77 OS=Homo sapiens PE=4 SV=1	HV209_HUMAN	16	8.45	Homo sapiens	0	0	0	0	0	0	0	0	0	0	2	0	0	0	3	0	0	0	0	0	0	0	0	0	0	0.17	0	0	0	0.17	0	0	0	0	0	0	0	0	0	0	2	0	0	0
344	Malate dehydrogenase, mitochondrial OS=Homo sapiens GN=MDH2 PE=1 SV=3	MDHM_HUMAN	36	8.9	Homo sapiens	0	3	3	0	0	0	0	0	2	0	0	0	0	0	0	0	0.12	0.14	0	0	0	0	0	0.08	0	0	0	0	0	0	0	3	3	0	0	0	0	0	2	0	0	0	0	0
345	Peroxiredoxin-2 OS=Homo sapiens GN=PRDX2 PE=1 SV=5	PRDX2_HUMAN	22	5.76	Homo sapiens	0	0	0	0	3	3	0	0	0	0	0	0	0	0	0	0	0	0	0	0.17	0.12	0	0	0	0	0	0	0	0	0	0	0	0	0	3	3	0	0	0	0	0	0	0	0
346	Intelectin-1 OS=Homo sapiens GN=ITLN1 PE=1 SV=1	ITLN1_HUMAN	35	5.89	Homo sapiens	0	0	0	0	0	0	0	0	0	0	0	0	0	0	0	0	0	0	0	0	0	0	0	0	0	0	0	0	0	0	0	0	0	0	0	0	0	0	0	0	0	0	0	0
347	Keratin, type I cuticular Ha1 OS=Homo sapiens GN=KRT31 PE=1 SV=3	K1H1_HUMAN	47	4.53	Homo sapiens	0	0	0	0	0	0	0	0	0	0	0	0	0	0	0	0	0	0	0	0	0	0	0	0	0	0	0	0	0	0	0	0	0	0	0	0	0	0	0	0	0	0	0	0
348	Calponin-2 OS=Homo sapiens GN=CNN2 PE=1 SV=4	CNN2_HUMAN	34	7.38	Homo sapiens	0	0	0	0	0	0	0	0	0	0	0	0	0	0	0	0	0	0	0	0	0	0	0	0	0	0	0	0	0	0	0	0	0	0	0	0	0	0	0	0	0	0	0	0
349	IgGFc-binding protein OS=Homo sapiens GN=FCGBP PE=1 SV=3	FCGBP_HUMAN	572	4.99	Homo sapiens	0	0	0	0	0	0	0	0	0	0	0	0	0	0	0	0	0	0	0	0	0	0	0	0	0	0	0	0	0	0	0	0	0	0	0	0	0	0	0	0	0	0	0	0
350	Complement factor H-related protein 2 OS=Homo sapiens GN=CFHR2 PE=1 SV=1	FHR2_HUMAN	31	6.34	Homo sapiens	0	0	0	0	0	0	0	0	0	0	0	0	0	0	0	0	0	0	0	0	0	0	0	0	0	0	0	0	0	0	0	0	0	0	0	0	0	0	0	0	0	0	0	0
351	Ras-related C3 botulinum toxin substrate 1 OS=Homo sapiens GN=RAC1 PE=1 SV=1	RAC1_HUMAN	21	8.65	Homo sapiens	0	0	2	0	0	0	0	0	0	0	0	0	0	0	0	0	0	0.057	0	0	0	0	0	0	0	0	0	0	0	0	0	0	2	0	0	0	0	0	0	0	0	0	0	0
352	F-actin-capping protein subunit alpha-1 OS=Homo sapiens GN=CAPZA1 PE=1 SV=3	CAZA1_HUMAN	33	5.42	Homo sapiens	0	0	0	0	0	0	0	0	0	0	0	0	0	0	0	0	0	0	0	0	0	0	0	0	0	0	0	0	0	0	0	0	0	0	0	0	0	0	0	0	0	0	0	0
353	Tropomyosin beta chain OS=Homo sapiens GN=TPM2 PE=1 SV=1	TPM2_HUMAN	33	4.36	Homo sapiens	0	0	0	0	0	0	0	0	0	0	0	0	0	0	0	0	0	0	0	0	0	0	0	0	0	0	0	0	0	0	0	0	0	0	0	0	0	0	0	0	0	0	0	0
354	Ig lambda chain V region 4A OS=Homo sapiens PE=4 SV=1	LV001_HUMAN	12	7.12	Homo sapiens	0	0	0	0	0	0	0	0	0	0	0	0	0	0	0	0	0	0	0	0	0	0	0	0	0	0	0	0	0	0	0	0	0	0	0	0	0	0	0	0	0	0	0	0
355	Adipocyte plasma membrane-associated protein OS=Homo sapiens GN=APMAP PE=1 SV=2	APMAP_HUMAN	46	6.02	Homo sapiens	0	0	0	0	0	0	0	0	0	0	0	0	0	0	0	0	0	0	0	0	0	0	0	0	0	0	0	0	0	0	0	0	0	0	0	0	0	0	0	0	0	0	0	0
356	Serglycin OS=Homo sapiens GN=SRGN PE=1 SV=3	SRGN_HUMAN	18	4.57	Homo sapiens	0	0	0	0	0	0	0	0	0	0	0	0	0	0	0	0	0	0	0	0	0	0	0	0	0	0	0	0	0	0	0	0	0	0	0	0	0	0	0	0	0	0	0	0
357	T-complex protein 1 subunit gamma OS=Homo sapiens GN=CCT3 PE=1 SV=4	TCPG_HUMAN	61	6.44	Homo sapiens	0	0	0	0	0	0	0	0	0	0	0	0	0	0	0	0	0	0	0	0	0	0	0	0	0	0	0	0	0	0	0	0	0	0	0	0	0	0	0	0	0	0	0	0
358	Importin subunit beta-1 OS=Homo sapiens GN=KPNB1 PE=1 SV=2	IMB1_HUMAN	97	4.41	Homo sapiens	0	0	0	0	0	0	0	0	0	0	0	0	0	0	0	0	0	0	0	0	0	0	0	0	0	0	0	0	0	0	0	0	0	0	0	0	0	0	0	0	0	0	0	0
359	Phosphoglycerate kinase 1 OS=Homo sapiens GN=PGK1 PE=1 SV=3	PGK1_HUMAN	45	8.27	Homo sapiens	0	0	0	0	0	0	0	3	0	0	0	0	0	0	0	0	0	0	0	0	0	0	0.11	0	0	0	0	0	0	0	0	0	0	0	0	0	0	3	0	0	0	0	0	0
360	Macrophage receptor MARCO OS=Homo sapiens GN=MARCO PE=1 SV=1	MARCO_HUMAN	53	9.15	Homo sapiens	3	2	0	0	0	0	0	2	0	0	0	0	0	0	0	0.069	0.054	0	0	0	0	0	0.069	0	0	0	0	0	0	0	2	2	0	0	0	0	0	2	0	0	0	0	0	0
361	Desmocollin-1 OS=Homo sapiens GN=DSC1 PE=1 SV=2	DSC1_HUMAN	100	5.08	Homo sapiens	0	0	0	0	0	0	0	0	0	0	0	0	0	0	0	0	0	0	0	0	0	0	0	0	0	0	0	0	0	0	0	0	0	0	0	0	0	0	0	0	0	0	0	0
362	Coronin-1A OS=Homo sapiens GN=CORO1A PE=1 SV=4	COR1A_HUMAN	51	6.67	Homo sapiens	0	0	0	0	0	0	0	0	0	0	0	0	0	0	0	0	0	0	0	0	0	0	0	0	0	0	0	0	0	0	0	0	0	0	0	0	0	0	0	0	0	0	0	0
363	Small proline-rich protein 2E OS=Homo sapiens GN=SPRR2E PE=2 SV=2	SPR2E_HUMAN	8	8.38	Homo sapiens	0	0	0	0	0	0	4	7	8	0	0	0	0	0	0	0	0	0	0	0	0	0.61	0.79	0.79	0	0	0	0	0	0	0	0	0	0	0	0	3	5	5	0	0	0	0	0
364	Proteoglycan 3 OS=Homo sapiens GN=PRG3 PE=1 SV=2	PRG3_HUMAN	25	4.43	Homo sapiens	0	0	0	0	0	0	0	0	0	0	0	0	0	0	0	0	0	0	0	0	0	0	0	0	0	0	0	0	0	0	0	0	0	0	0	0	0	0	0	0	0	0	0	0
365	Peptidase inhibitor 16 OS=Homo sapiens GN=PI16 PE=1 SV=1	PI16_HUMAN	49	5.09	Homo sapiens	0	0	0	0	0	0	0	0	0	0	0	0	0	0	0	0	0	0	0	0	0	0	0	0	0	0	0	0	0	0	0	0	0	0	0	0	0	0	0	0	0	0	0	0
366	Ig kappa chain V-III region CLL OS=Homo sapiens PE=4 SV=2	KV308_HUMAN	14	8.7	Homo sapiens	0	0	0	0	0	0	0	0	0	0	0	0	0	0	0	0	0	0	0	0	0	0	0	0	0	0	0	0	0	0	0	0	0	0	0	0	0	0	0	0	0	0	0	0
367	Keratin, type II cytoskeletal 3 OS=Homo sapiens GN=KRT3 PE=1 SV=3	K2C3_HUMAN	64	6.41	Homo sapiens	0	0	0	0	0	0	0	0	0	0	0	0	0	0	0	0	0	0	0	0	0	0	0	0	0	0	0	0	0	0	0	0	0	0	0	0	0	0	0	0	0	0	0	0
368	ADP-ribosylation factor 1 OS=Homo sapiens GN=ARF1 PE=1 SV=2	ARF1_HUMAN	21	6.8	Homo sapiens	0	0	0	0	0	0	0	0	0	0	0	0	0	0	0	0	0	0	0	0	0	0	0	0	0	0	0	0	0	0	0	0	0	0	0	0	0	0	0	0	0	0	0	0
369	Beta-2-microglobulin OS=Homo sapiens GN=B2M PE=1 SV=1	B2MG_HUMAN	14	6.51	Homo sapiens	0	0	0	0	0	0	0	0	0	0	0	0	0	0	0	0	0	0	0	0	0	0	0	0	0	0	0	0	0	0	0	0	0	0	0	0	0	0	0	0	0	0	0	0
370	Tenascin-X OS=Homo sapiens GN=TNXB PE=1 SV=3	TENX_HUMAN	464	4.81	Homo sapiens	0	0	0	0	0	0	0	0	0	0	0	0	0	0	0	0	0	0	0	0	0	0	0	0	0	0	0	0	0	0	0	0	0	0	0	0	0	0	0	0	0	0	0	0
371	Actin-related protein 2 OS=Homo sapiens GN=ACTR2 PE=1 SV=1	ARP2_HUMAN	45	6.72	Homo sapiens	0	0	0	0	0	0	0	0	2	0	0	0	0	0	0	0	0	0	0	0	0	0	0	0.061	0	0	0	0	0	0	0	0	0	0	0	0	0	0	2	0	0	0	0	0
372	Calnexin OS=Homo sapiens GN=CANX PE=1 SV=2	CALX_HUMAN	68	4.21	Homo sapiens	0	0	0	0	0	0	0	0	0	0	0	0	0	0	0	0	0	0	0	0	0	0	0	0	0	0	0	0	0	0	0	0	0	0	0	0	0	0	0	0	0	0	0	0
373	ADP/ATP translocase 3 OS=Homo sapiens GN=SLC25A6 PE=1 SV=4	ADT3_HUMAN	33	10.26	Homo sapiens	0	0	0	0	0	0	0	0	0	0	0	0	0	0	0	0	0	0	0	0	0	0	0	0	0	0	0	0	0	0	0	0	0	0	0	0	0	0	0	0	0	0	0	0
374	Group XIIB secretory phospholipase A2-like protein OS=Homo sapiens GN=PLA2G12B PE=1 SV=2	PG12B_HUMAN	22	5.81	Homo sapiens	0	0	0	0	0	0	0	0	0	0	0	0	0	0	0	0	0	0	0	0	0	0	0	0	0	0	0	0	0	0	0	0	0	0	0	0	0	0	0	0	0	0	0	0
375	Cytochrome b-c1 complex subunit 2, mitochondrial OS=Homo sapiens GN=UQCRC2 PE=1 SV=3	QCR2_HUMAN	48	8.92	Homo sapiens	0	0	2	0	0	0	0	0	0	0	0	0	0	0	0	0	0	0.068	0	0	0	0	0	0	0	0	0	0	0	0	0	0	2	0	0	0	0	0	0	0	0	0	0	0
376	Ig heavy chain V-I region V35 OS=Homo sapiens PE=1 SV=1	HV103_HUMAN	13	9.87	Homo sapiens	0	0	0	0	0	0	0	0	0	0	0	0	0	0	0	0	0	0	0	0	0	0	0	0	0	0	0	0	0	0	0	0	0	0	0	0	0	0	0	0	0	0	0	0
377	Actin-related protein 2/3 complex subunit 1B OS=Homo sapiens GN=ARPC1B PE=1 SV=3	ARC1B_HUMAN	41	8.44	Homo sapiens	0	0	0	0	0	0	2	0	0	0	0	0	0	0	0	0	0	0	0	0	0	0.078	0	0	0	0	0	0	0	0	0	0	0	0	0	0	2	0	0	0	0	0	0	0
378	P-selectin OS=Homo sapiens GN=SELP PE=1 SV=3	LYAM3_HUMAN	91	6.57	Homo sapiens	0	0	2	0	0	0	0	3	0	0	0	0	0	0	0	0	0	0.029	0	0	0	0	0.03	0	0	0	0	0	0	0	0	0	2	0	0	0	0	3	0	0	0	0	0	0
379	Putative elongation factor 1-alpha-like 3 OS=Homo sapiens GN=EEF1A1P5 PE=5 SV=1	EF1A3_HUMAN	50	9.58	Homo sapiens	0	0	0	0	0	0	3	3	3	0	0	0	0	0	0	0	0	0	0	0	0	0.065	0.071	0.097	0	0	0	0	0	0	0	0	0	0	0	0	3	3	3	0	0	0	0	0
380	Carbonic anhydrase 1 OS=Homo sapiens GN=CA1 PE=1 SV=2	CAH1_HUMAN	29	7.14	Homo sapiens	0	0	0	5	6	7	0	0	0	0	0	0	0	0	0	0	0	0	0.21	0.28	0.26	0	0	0	0	0	0	0	0	0	0	0	0	4	6	6	0	0	0	0	0	0	0	0
381	Actin-related protein 2/3 complex subunit 3 OS=Homo sapiens GN=ARPC3 PE=1 SV=3	ARPC3_HUMAN	21	8.83	Homo sapiens	0	0	0	0	0	0	0	0	0	0	0	0	0	0	0	0	0	0	0	0	0	0	0	0	0	0	0	0	0	0	0	0	0	0	0	0	0	0	0	0	0	0	0	0
382	Voltage-dependent anion-selective channel protein 3 OS=Homo sapiens GN=VDAC3 PE=1 SV=1	VDAC3_HUMAN	31	8.9	Homo sapiens	2	2	2	0	0	0	2	2	2	0	0	0	0	0	0	0.074	0.074	0.074	0	0	0	0.074	0.074	0.074	0	0	0	0	0	0	2	2	2	0	0	0	2	2	2	0	0	0	0	0
383	Protein S100-A12 OS=Homo sapiens GN=S100A12 PE=1 SV=2	S10AC_HUMAN	11	6.23	Homo sapiens	0	0	0	0	0	0	0	0	0	0	0	0	0	0	0	0	0	0	0	0	0	0	0	0	0	0	0	0	0	0	0	0	0	0	0	0	0	0	0	0	0	0	0	0
384	Actin-related protein 2/3 complex subunit 5 OS=Homo sapiens GN=ARPC5 PE=1 SV=3	ARPC5_HUMAN	16	5.3	Homo sapiens	0	0	0	0	0	0	0	0	0	0	0	0	0	0	0	0	0	0	0	0	0	0	0	0	0	0	0	0	0	0	0	0	0	0	0	0	0	0	0	0	0	0	0	0
385	Protocadherin-12 OS=Homo sapiens GN=PCDH12 PE=1 SV=1	PCD12_HUMAN	129	4.93	Homo sapiens	0	0	0	0	0	0	0	0	0	0	0	0	0	0	0	0	0	0	0	0	0	0	0	0	0	0	0	0	0	0	0	0	0	0	0	0	0	0	0	0	0	0	0	0
386	Tetraspanin-14 OS=Homo sapiens GN=TSPAN14 PE=1 SV=1	TSN14_HUMAN	31	6.84	Homo sapiens	0	0	0	0	0	0	0	0	0	0	0	0	0	0	0	0	0	0	0	0	0	0	0	0	0	0	0	0	0	0	0	0	0	0	0	0	0	0	0	0	0	0	0	0
387	Heat shock protein beta-1 OS=Homo sapiens GN=HSPB1 PE=1 SV=2	HSPB1_HUMAN	23	6.36	Homo sapiens	0	0	0	0	0	0	3	5	2	0	0	0	0	0	0	0	0	0	0	0	0	0.18	0.29	0.13	0	0	0	0	0	0	0	0	0	0	0	0	3	5	2	0	0	0	0	0
388	Ras-related protein Rab-1B OS=Homo sapiens GN=RAB1B PE=1 SV=1	RAB1B_HUMAN	22	5.38	Homo sapiens	0	0	0	0	0	0	2	0	0	0	0	0	0	0	0	0	0	0	0	0	0	0.13	0	0	0	0	0	0	0	0	0	0	0	0	0	0	2	0	0	0	0	0	0	0
389	Disintegrin and metalloproteinase domain-containing protein 10 OS=Homo sapiens GN=ADAM10 PE=1 SV=1	ADA10_HUMAN	84	7.81	Homo sapiens	0	0	0	0	0	0	0	0	0	0	0	0	0	0	0	0	0	0	0	0	0	0	0	0	0	0	0	0	0	0	0	0	0	0	0	0	0	0	0	0	0	0	0	0
390	C-C motif chemokine 5 OS=Homo sapiens GN=CCL5 PE=1 SV=3	CCL5_HUMAN	10	9.29	Homo sapiens	2	0	2	0	0	0	0	0	0	0	0	0	0	0	0	0.26	0	0.26	0	0	0	0	0	0	0	0	0	0	0	0	2	0	2	0	0	0	0	0	0	0	0	0	0	0
391	Hepatocyte growth factor activator OS=Homo sapiens GN=HGFAC PE=1 SV=1	HGFA_HUMAN	71	7.24	Homo sapiens	0	0	0	0	0	0	0	0	0	0	0	0	0	0	0	0	0	0	0	0	0	0	0	0	0	0	0	0	0	0	0	0	0	0	0	0	0	0	0	0	0	0	0	0
392	L-lactate dehydrogenase A chain OS=Homo sapiens GN=LDHA PE=1 SV=2	LDHA_HUMAN	37	8.45	Homo sapiens	0	0	0	0	0	0	0	3	4	0	0	0	0	0	0	0	0	0	0	0	0	0	0.072	0.14	0	0	0	0	0	0	0	0	0	0	0	0	0	2	3	0	0	0	0	0
393	Soluble scavenger receptor cysteine-rich domain-containing protein SSC5D OS=Homo sapiens GN=SSC5D PE=1 SV=3	SRCRL_HUMAN	166	6.06	Homo sapiens	0	0	0	0	0	0	0	0	0	0	0	0	0	0	0	0	0	0	0	0	0	0	0	0	0	0	0	0	0	0	0	0	0	0	0	0	0	0	0	0	0	0	0	0
394	Receptor-type tyrosine-protein phosphatase C OS=Homo sapiens GN=PTPRC PE=1 SV=2	PTPRC_HUMAN	147	6.08	Homo sapiens	0	0	0	0	0	0	0	0	0	0	0	0	0	0	0	0	0	0	0	0	0	0	0	0	0	0	0	0	0	0	0	0	0	0	0	0	0	0	0	0	0	0	0	0
395	Thioredoxin OS=Homo sapiens GN=TXN PE=1 SV=3	THIO_HUMAN	12	4.55	Homo sapiens	0	0	0	0	0	0	0	0	0	0	0	0	0	0	0	0	0	0	0	0	0	0	0	0	0	0	0	0	0	0	0	0	0	0	0	0	0	0	0	0	0	0	0	0
396	Angiogenin OS=Homo sapiens GN=ANG PE=1 SV=1	ANGI_HUMAN	17	10.09	Homo sapiens	0	0	0	0	0	0	0	0	0	0	0	0	0	0	0	0	0	0	0	0	0	0	0	0	0	0	0	0	0	0	0	0	0	0	0	0	0	0	0	0	0	0	0	0
397	Ig delta chain C region OS=Homo sapiens GN=IGHD PE=1 SV=2	IGHD_HUMAN	42	8.02	Homo sapiens	0	0	0	0	0	0	0	0	0	0	0	0	0	0	0	0	0	0	0	0	0	0	0	0	0	0	0	0	0	0	0	0	0	0	0	0	0	0	0	0	0	0	0	0
398	Calpain small subunit 1 OS=Homo sapiens GN=CAPNS1 PE=1 SV=1	CPNS1_HUMAN	28	4.82	Homo sapiens	0	0	0	0	0	0	0	0	0	0	0	0	0	0	0	0	0	0	0	0	0	0	0	0	0	0	0	0	0	0	0	0	0	0	0	0	0	0	0	0	0	0	0	0
399	SH3 domain-binding glutamic acid-rich-like protein 3 OS=Homo sapiens GN=SH3BGRL3 PE=1 SV=1	SH3L3_HUMAN	10	4.56	Homo sapiens	0	0	0	0	0	0	0	0	0	0	0	0	0	0	0	0	0	0	0	0	0	0	0	0	0	0	0	0	0	0	0	0	0	0	0	0	0	0	0	0	0	0	0	0
400	Neural cell adhesion molecule 1 OS=Homo sapiens GN=NCAM1 PE=1 SV=3	NCAM1_HUMAN	95	4.51	Homo sapiens	0	0	0	0	0	0	0	0	0	0	0	0	0	0	0	0	0	0	0	0	0	0	0	0	0	0	0	0	0	0	0	0	0	0	0	0	0	0	0	0	0	0	0	0
401	EGF-containing fibulin-like extracellular matrix protein 1 OS=Homo sapiens GN=EFEMP1 PE=1 SV=2	FBLN3_HUMAN	55	4.7	Homo sapiens	0	0	0	0	0	0	0	0	0	0	0	0	0	0	0	0	0	0	0	0	0	0	0	0	0	0	0	0	0	0	0	0	0	0	0	0	0	0	0	0	0	0	0	0
402	Caldesmon OS=Homo sapiens GN=CALD1 PE=1 SV=3	CALD1_HUMAN	93	5.35	Homo sapiens	0	0	0	0	0	0	0	0	0	0	0	0	0	0	0	0	0	0	0	0	0	0	0	0	0	0	0	0	0	0	0	0	0	0	0	0	0	0	0	0	0	0	0	0
403	Catalase OS=Homo sapiens GN=CAT PE=1 SV=3	CATA_HUMAN	60	7.41	Homo sapiens	0	0	0	0	0	0	0	0	0	0	0	0	0	0	0	0	0	0	0	0	0	0	0	0	0	0	0	0	0	0	0	0	0	0	0	0	0	0	0	0	0	0	0	0
404	CD99 antigen OS=Homo sapiens GN=CD99 PE=1 SV=1	CD99_HUMAN	19	4.34	Homo sapiens	0	0	0	0	0	0	0	0	0	0	0	0	0	0	0	0	0	0	0	0	0	0	0	0	0	0	0	0	0	0	0	0	0	0	0	0	0	0	0	0	0	0	0	0
405	Heat shock 70 kDa protein 1A/1B OS=Homo sapiens GN=HSPA1A PE=1 SV=5	HSP71_HUMAN	?	5.47	Homo sapiens	0	0	0	0	0	0	4	0	0	0	0	0	0	0	0	0	0	0	0	0	0	0	0	0	0	0	0	0	0	0	0	0	0	0	0	0	2	0	0	0	0	0	0	0
406	ADAMTS-like protein 2 OS=Homo sapiens GN=ADAMTSL2 PE=1 SV=1	ATL2_HUMAN	105	6.38	Homo sapiens	0	0	0	0	0	0	0	0	0	0	0	0	0	0	0	0	0	0	0	0	0	0	0	0	0	0	0	0	0	0	0	0	0	0	0	0	0	0	0	0	0	0	0	0
407	Ig lambda-7 chain C region OS=Homo sapiens GN=IGLC7 PE=4 SV=2	LAC7_HUMAN	11	8.48	Homo sapiens	0	0	0	0	0	0	0	0	0	0	0	0	0	0	0	0	0	0	0	0	0	0	0	0	0	0	0	0	0	0	0	0	0	0	0	0	0	0	0	0	0	0	0	0
408	Glutathione peroxidase 1 OS=Homo sapiens GN=GPX1 PE=1 SV=4	GPX1_HUMAN	22	6.51	Homo sapiens	0	0	0	0	0	0	0	0	0	0	0	0	0	0	0	0	0	0	0	0	0	0	0	0	0	0	0	0	0	0	0	0	0	0	0	0	0	0	0	0	0	0	0	0
409	Platelet glycoprotein V OS=Homo sapiens GN=GP5 PE=1 SV=1	GPV_HUMAN	61	10.24	Homo sapiens	0	0	0	0	0	0	0	0	0	0	0	0	0	0	0	0	0	0	0	0	0	0	0	0	0	0	0	0	0	0	0	0	0	0	0	0	0	0	0	0	0	0	0	0
410	ATP synthase subunit O, mitochondrial OS=Homo sapiens GN=ATP5O PE=1 SV=1	ATPO_HUMAN	23	10.61	Homo sapiens	0	0	0	0	0	0	0	0	0	0	0	0	0	0	0	0	0	0	0	0	0	0	0	0	0	0	0	0	0	0	0	0	0	0	0	0	0	0	0	0	0	0	0	0
411	Calpain-1 catalytic subunit OS=Homo sapiens GN=CAPN1 PE=1 SV=1	CAN1_HUMAN	82	5.35	Homo sapiens	0	0	0	0	0	0	0	0	0	0	0	0	0	0	0	0	0	0	0	0	0	0	0	0	0	0	0	0	0	0	0	0	0	0	0	0	0	0	0	0	0	0	0	0
412	Protein unc-13 homolog D OS=Homo sapiens GN=UNC13D PE=1 SV=1	UN13D_HUMAN	123	6.64	Homo sapiens	2	0	0	0	0	0	0	0	0	0	0	0	0	0	0	0.019	0	0	0	0	0	0	0	0	0	0	0	0	0	0	2	0	0	0	0	0	0	0	0	0	0	0	0	0
413	Fibulin-5 OS=Homo sapiens GN=FBLN5 PE=1 SV=1	FBLN5_HUMAN	50	4.33	Homo sapiens	0	0	0	0	0	0	0	0	0	0	0	0	0	0	0	0	0	0	0	0	0	0	0	0	0	0	0	0	0	0	0	0	0	0	0	0	0	0	0	0	0	0	0	0
414	Olfactomedin-4 OS=Homo sapiens GN=OLFM4 PE=1 SV=1	OLFM4_HUMAN	57	5.37	Homo sapiens	0	0	0	0	0	0	0	0	0	0	0	0	0	0	0	0	0	0	0	0	0	0	0	0	0	0	0	0	0	0	0	0	0	0	0	0	0	0	0	0	0	0	0	0
415	Proteasome subunit beta type-6 OS=Homo sapiens GN=PSMB6 PE=1 SV=4	PSB6_HUMAN	25	4.54	Homo sapiens	0	0	0	0	0	0	0	0	0	0	0	0	0	0	0	0	0	0	0	0	0	0	0	0	0	0	0	0	0	0	0	0	0	0	0	0	0	0	0	0	0	0	0	0
416	Dynamin-1-like protein OS=Homo sapiens GN=DNM1L PE=1 SV=2	DNM1L_HUMAN	82	6.8	Homo sapiens	0	0	0	0	0	0	0	0	0	0	0	0	0	0	0	0	0	0	0	0	0	0	0	0	0	0	0	0	0	0	0	0	0	0	0	0	0	0	0	0	0	0	0	0
417	Macrophage migration inhibitory factor OS=Homo sapiens GN=MIF PE=1 SV=4	MIF_HUMAN	12	8.05	Homo sapiens	0	0	0	0	0	0	0	0	0	0	0	0	0	0	0	0	0	0	0	0	0	0	0	0	0	0	0	0	0	0	0	0	0	0	0	0	0	0	0	0	0	0	0	0
418	Neutral alpha-glucosidase AB OS=Homo sapiens GN=GANAB PE=1 SV=3	GANAB_HUMAN	107	6.06	Homo sapiens	0	0	0	0	0	0	0	0	0	0	0	0	0	0	0	0	0	0	0	0	0	0	0	0	0	0	0	0	0	0	0	0	0	0	0	0	0	0	0	0	0	0	0	0
419	Synaptosomal-associated protein 23 OS=Homo sapiens GN=SNAP23 PE=1 SV=1	SNP23_HUMAN	23	4.62	Homo sapiens	0	0	0	0	0	0	0	0	0	0	0	0	0	0	0	0	0	0	0	0	0	0	0	0	0	0	0	0	0	0	0	0	0	0	0	0	0	0	0	0	0	0	0	0
420	Neuropilin-1 OS=Homo sapiens GN=NRP1 PE=1 SV=3	NRP1_HUMAN	103	5.71	Homo sapiens	0	0	0	0	0	0	0	0	0	0	0	0	0	0	0	0	0	0	0	0	0	0	0	0	0	0	0	0	0	0	0	0	0	0	0	0	0	0	0	0	0	0	0	0
421	Protein G6b OS=Homo sapiens GN=G6B PE=1 SV=1	G6B_HUMAN	26	10.08	Homo sapiens	0	0	0	0	0	0	0	0	0	0	0	0	0	0	0	0	0	0	0	0	0	0	0	0	0	0	0	0	0	0	0	0	0	0	0	0	0	0	0	0	0	0	0	0
422	C-type lectin domain family 11 member A OS=Homo sapiens GN=CLEC11A PE=1 SV=1	CLC11_HUMAN	36	4.82	Homo sapiens	0	0	0	0	0	0	0	0	0	0	0	0	0	0	0	0	0	0	0	0	0	0	0	0	0	0	0	0	0	0	0	0	0	0	0	0	0	0	0	0	0	0	0	0
423	Sex hormone-binding globulin OS=Homo sapiens GN=SHBG PE=1 SV=2	SHBG_HUMAN	44	6.7	Homo sapiens	0	0	0	0	0	0	0	0	0	0	0	0	0	0	0	0	0	0	0	0	0	0	0	0	0	0	0	0	0	0	0	0	0	0	0	0	0	0	0	0	0	0	0	0
424	Plastin-2 OS=Homo sapiens GN=LCP1 PE=1 SV=6	PLSL_HUMAN	70	5.07	Homo sapiens	0	0	0	0	0	0	0	0	0	0	0	0	0	0	0	0	0	0	0	0	0	0	0	0	0	0	0	0	0	0	0	0	0	0	0	0	0	0	0	0	0	0	0	0
425	Plectin OS=Homo sapiens GN=PLEC PE=1 SV=3	PLEC_HUMAN	532	5.76	Homo sapiens	0	0	0	0	0	0	0	0	0	0	0	0	0	0	0	0	0	0	0	0	0	0	0	0	0	0	0	0	0	0	0	0	0	0	0	0	0	0	0	0	0	0	0	0
426	Endonuclease domain-containing 1 protein OS=Homo sapiens GN=ENDOD1 PE=1 SV=2	ENDD1_HUMAN	55	5.38	Homo sapiens	0	0	0	0	0	0	0	0	0	0	0	0	0	0	0	0	0	0	0	0	0	0	0	0	0	0	0	0	0	0	0	0	0	0	0	0	0	0	0	0	0	0	0	0
427	Carboxypeptidase Q OS=Homo sapiens GN=CPQ PE=1 SV=1	CBPQ_HUMAN	52	6.1	Homo sapiens	0	0	0	0	0	0	0	0	0	0	0	0	0	0	0	0	0	0	0	0	0	0	0	0	0	0	0	0	0	0	0	0	0	0	0	0	0	0	0	0	0	0	0	0
428	Transforming growth factor beta-1 OS=Homo sapiens GN=TGFB1 PE=1 SV=2	TGFB1_HUMAN	44	8.63	Homo sapiens	0	0	0	0	0	0	0	0	0	0	0	0	0	0	0	0	0	0	0	0	0	0	0	0	0	0	0	0	0	0	0	0	0	0	0	0	0	0	0	0	0	0	0	0
429	Caspase-14 OS=Homo sapiens GN=CASP14 PE=1 SV=2	CASPE_HUMAN	28	5.28	Homo sapiens	0	0	0	0	0	0	2	2	2	0	0	0	0	0	0	0	0	0	0	0	0	0.12	0.14	0.14	0	0	0	0	0	0	0	0	0	0	0	0	2	2	2	0	0	0	0	0
430	Protocadherin-18 OS=Homo sapiens GN=PCDH18 PE=2 SV=3	PCD18_HUMAN	126	4.78	Homo sapiens	2	3	0	0	0	2	0	0	0	0	0	0	0	0	0	0.024	0.051	0	0	0	0.033	0	0	0	0	0	0	0	0	0	2	3	0	0	0	2	0	0	0	0	0	0	0	0
431	Cadherin-related family member 2 OS=Homo sapiens GN=CDHR2 PE=1 SV=2	CDHR2_HUMAN	142	4.08	Homo sapiens	0	0	0	0	0	0	0	0	0	0	0	0	0	0	0	0	0	0	0	0	0	0	0	0	0	0	0	0	0	0	0	0	0	0	0	0	0	0	0	0	0	0	0	0
432	Resistin OS=Homo sapiens GN=RETN PE=2 SV=1	RETN_HUMAN	11	6.89	Homo sapiens	0	0	0	0	0	0	0	0	0	0	0	0	0	0	0	0	0	0	0	0	0	0	0	0	0	0	0	0	0	0	0	0	0	0	0	0	0	0	0	0	0	0	0	0
433	Tropomodulin-3 OS=Homo sapiens GN=TMOD3 PE=1 SV=1	TMOD3_HUMAN	40	4.83	Homo sapiens	0	0	0	0	0	0	0	2	0	0	0	0	0	0	0	0	0	0	0	0	0	0	0.051	0	0	0	0	0	0	0	0	0	0	0	0	0	0	2	0	0	0	0	0	0
434	Eukaryotic translation initiation factor 5A-1 OS=Homo sapiens GN=EIF5A PE=1 SV=2	IF5A1_HUMAN	17	4.86	Homo sapiens	0	0	0	0	0	0	0	0	0	0	0	0	0	0	0	0	0	0	0	0	0	0	0	0	0	0	0	0	0	0	0	0	0	0	0	0	0	0	0	0	0	0	0	0
435	Heparanase OS=Homo sapiens GN=HPSE PE=1 SV=2	HPSE_HUMAN	61	9.71	Homo sapiens	0	0	0	0	0	0	0	0	0	0	0	0	0	0	0	0	0	0	0	0	0	0	0	0	0	0	0	0	0	0	0	0	0	0	0	0	0	0	0	0	0	0	0	0
436	Hepatocyte growth factor-like protein OS=Homo sapiens GN=MST1 PE=1 SV=2	HGFL_HUMAN	80	7.71	Homo sapiens	0	0	0	0	0	0	0	0	0	0	0	0	0	0	0	0	0	0	0	0	0	0	0	0	0	0	0	0	0	0	0	0	0	0	0	0	0	0	0	0	0	0	0	0
437	Keratin, type II cytoskeletal 78 OS=Homo sapiens GN=KRT78 PE=2 SV=2	K2C78_HUMAN	57	5.83	Homo sapiens	0	0	0	0	0	0	0	0	0	0	0	0	0	0	0	0	0	0	0	0	0	0	0	0	0	0	0	0	0	0	0	0	0	0	0	0	0	0	0	0	0	0	0	0
438	Amyloid-like protein 2 OS=Homo sapiens GN=APLP2 PE=1 SV=2	APLP2_HUMAN	87	4.44	Homo sapiens	0	0	0	0	0	0	0	0	0	0	0	0	0	0	0	0	0	0	0	0	0	0	0	0	0	0	0	0	0	0	0	0	0	0	0	0	0	0	0	0	0	0	0	0
439	Prolactin-inducible protein OS=Homo sapiens GN=PIP PE=1 SV=1	PIP_HUMAN	17	8.18	Homo sapiens	0	0	0	0	0	0	0	0	0	0	0	0	0	0	0	0	0	0	0	0	0	0	0	0	0	0	0	0	0	0	0	0	0	0	0	0	0	0	0	0	0	0	0	0
440	Tight junction protein ZO-2 OS=Homo sapiens GN=TJP2 PE=1 SV=2	ZO2_HUMAN	134	7.43	Homo sapiens	0	0	0	0	0	0	0	0	0	0	0	0	0	0	0	0	0	0	0	0	0	0	0	0	0	0	0	0	0	0	0	0	0	0	0	0	0	0	0	0	0	0	0	0
441	EMILIN-1 OS=Homo sapiens GN=EMILIN1 PE=1 SV=2	EMIL1_HUMAN	107	4.81	Homo sapiens	0	2	0	0	0	0	0	0	0	0	0	0	0	0	0	0	0.029	0	0	0	0	0	0	0	0	0	0	0	0	0	0	2	0	0	0	0	0	0	0	0	0	0	0	0
442	Peroxiredoxin-1 OS=Homo sapiens GN=PRDX1 PE=1 SV=1	PRDX1_HUMAN	22	8.31	Homo sapiens	0	0	0	0	0	0	2	2	2	0	0	0	0	0	0	0	0	0	0	0	0	0.17	0.11	0.11	0	0	0	0	0	0	0	0	0	0	0	0	2	2	2	0	0	0	0	0
443	Keratin, type II cytoskeletal 4 OS=Homo sapiens GN=KRT4 PE=1 SV=4	K2C4_HUMAN	57	6.55	Homo sapiens	0	0	0	0	0	0	0	0	0	0	0	0	0	0	0	0	0	0	0	0	0	0	0	0	0	0	0	0	0	0	0	0	0	0	0	0	0	0	0	0	0	0	0	0
444	Cathepsin G OS=Homo sapiens GN=CTSG PE=1 SV=2	CATG_HUMAN	29	11.69	Homo sapiens	0	0	0	0	0	0	0	0	0	0	0	0	0	0	0	0	0	0	0	0	0	0	0	0	0	0	0	0	0	0	0	0	0	0	0	0	0	0	0	0	0	0	0	0
445	Proline-serine-threonine phosphatase-interacting protein 2 OS=Homo sapiens GN=PSTPIP2 PE=1 SV=4	PPIP2_HUMAN	39	8.68	Homo sapiens	0	0	0	0	0	0	0	0	0	0	0	0	0	0	0	0	0	0	0	0	0	0	0	0	0	0	0	0	0	0	0	0	0	0	0	0	0	0	0	0	0	0	0	0
446	Sulfhydryl oxidase 1 OS=Homo sapiens GN=QSOX1 PE=1 SV=3	QSOX1_HUMAN	83	9.18	Homo sapiens	0	0	0	0	0	0	0	0	0	0	0	0	0	0	0	0	0	0	0	0	0	0	0	0	0	0	0	0	0	0	0	0	0	0	0	0	0	0	0	0	0	0	0	0
447	CD226 antigen OS=Homo sapiens GN=CD226 PE=1 SV=2	CD226_HUMAN	39	8.04	Homo sapiens	0	0	0	0	0	0	0	0	0	0	0	0	0	0	0	0	0	0	0	0	0	0	0	0	0	0	0	0	0	0	0	0	0	0	0	0	0	0	0	0	0	0	0	0
448	Reticulon-4 OS=Homo sapiens GN=RTN4 PE=1 SV=2	RTN4_HUMAN	130	4.14	Homo sapiens	0	0	0	0	0	0	0	0	0	0	0	0	0	0	0	0	0	0	0	0	0	0	0	0	0	0	0	0	0	0	0	0	0	0	0	0	0	0	0	0	0	0	0	0
449	Protein Shroom3 OS=Homo sapiens GN=SHROOM3 PE=1 SV=2	SHRM3_HUMAN	217	7.85	Homo sapiens	0	0	0	0	0	0	0	0	0	0	0	0	0	0	0	0	0	0	0	0	0	0	0	0	0	0	0	0	0	0	0	0	0	0	0	0	0	0	0	0	0	0	0	0
450	Proteasome subunit alpha type-7 OS=Homo sapiens GN=PSMA7 PE=1 SV=1	PSA7_HUMAN	28	8.73	Homo sapiens	0	0	0	0	0	0	0	0	0	0	0	0	0	0	0	0	0	0	0	0	0	0	0	0	0	0	0	0	0	0	0	0	0	0	0	0	0	0	0	0	0	0	0	0
451	Nexilin OS=Homo sapiens GN=NEXN PE=1 SV=1	NEXN_HUMAN	81	4.99	Homo sapiens	0	0	0	0	0	0	0	0	0	0	0	0	0	0	0	0	0	0	0	0	0	0	0	0	0	0	0	0	0	0	0	0	0	0	0	0	0	0	0	0	0	0	0	0
452	Proto-oncogene tyrosine-protein kinase Src OS=Homo sapiens GN=SRC PE=1 SV=3	SRC_HUMAN	60	7.47	Homo sapiens	0	0	0	0	0	0	0	0	0	0	0	0	0	0	0	0	0	0	0	0	0	0	0	0	0	0	0	0	0	0	0	0	0	0	0	0	0	0	0	0	0	0	0	0
453	T-complex protein 1 subunit beta OS=Homo sapiens GN=CCT2 PE=1 SV=4	TCPB_HUMAN	57	6.42	Homo sapiens	0	0	0	0	0	0	0	0	0	0	0	0	0	0	0	0	0	0	0	0	0	0	0	0	0	0	0	0	0	0	0	0	0	0	0	0	0	0	0	0	0	0	0	0
454	Myosin light chain kinase, smooth muscle OS=Homo sapiens GN=MYLK PE=1 SV=4	MYLK_HUMAN	211	6.03	Homo sapiens	0	0	0	0	0	0	0	0	0	0	0	0	0	0	0	0	0	0	0	0	0	0	0	0	0	0	0	0	0	0	0	0	0	0	0	0	0	0	0	0	0	0	0	0
455	NADH-cytochrome b5 reductase 3 OS=Homo sapiens GN=CYB5R3 PE=1 SV=3	NB5R3_HUMAN	34	7.68	Homo sapiens	0	0	0	0	0	0	0	0	0	0	0	0	0	0	0	0	0	0	0	0	0	0	0	0	0	0	0	0	0	0	0	0	0	0	0	0	0	0	0	0	0	0	0	0
456	Ig kappa chain V-I region HK102 (Fragment) OS=Homo sapiens GN=IGKV1-5 PE=4 SV=1	KV110_HUMAN	13	8.46	Homo sapiens	0	0	0	0	0	0	0	0	0	0	0	0	0	0	3	0	0	0	0	0	0	0	0	0	0	0	0	0	0	0.4	0	0	0	0	0	0	0	0	0	0	0	0	0	0
457	Syntaxin-binding protein 2 OS=Homo sapiens GN=STXBP2 PE=1 SV=2	STXB2_HUMAN	66	6.52	Homo sapiens	0	0	0	0	0	0	0	0	0	0	0	0	0	0	0	0	0	0	0	0	0	0	0	0	0	0	0	0	0	0	0	0	0	0	0	0	0	0	0	0	0	0	0	0
458	T-complex protein 1 subunit zeta OS=Homo sapiens GN=CCT6A PE=1 SV=3	TCPZ_HUMAN	58	6.65	Homo sapiens	0	0	0	0	0	0	0	0	0	0	0	0	0	0	0	0	0	0	0	0	0	0	0	0	0	0	0	0	0	0	0	0	0	0	0	0	0	0	0	0	0	0	0	0
459	Secretogranin-1 OS=Homo sapiens GN=CHGB PE=1 SV=2	SCG1_HUMAN	78	4.74	Homo sapiens	0	0	0	0	0	0	0	0	0	0	0	0	0	0	0	0	0	0	0	0	0	0	0	0	0	0	0	0	0	0	0	0	0	0	0	0	0	0	0	0	0	0	0	0
460	Galectin-7 OS=Homo sapiens GN=LGALS7 PE=1 SV=2	LEG7_HUMAN	15	7.78	Homo sapiens	0	0	0	0	0	0	4	4	2	0	0	0	0	0	0	0	0	0	0	0	0	0.32	0.47	0.24	0	0	0	0	0	0	0	0	0	0	0	0	4	4	2	0	0	0	0	0
461	Proteasome subunit beta type-8 OS=Homo sapiens GN=PSMB8 PE=1 SV=3	PSB8_HUMAN	30	7.49	Homo sapiens	0	0	0	0	0	0	0	0	0	0	0	0	0	0	0	0	0	0	0	0	0	0	0	0	0	0	0	0	0	0	0	0	0	0	0	0	0	0	0	0	0	0	0	0
462	Alpha-soluble NSF attachment protein OS=Homo sapiens GN=NAPA PE=1 SV=3	SNAA_HUMAN	33	5.02	Homo sapiens	0	0	0	0	0	0	0	0	0	0	0	0	0	0	0	0	0	0	0	0	0	0	0	0	0	0	0	0	0	0	0	0	0	0	0	0	0	0	0	0	0	0	0	0
463	Laminin subunit beta-1 OS=Homo sapiens GN=LAMB1 PE=1 SV=2	LAMB1_HUMAN	198	4.57	Homo sapiens	0	0	0	0	0	0	0	0	0	0	0	0	0	0	0	0	0	0	0	0	0	0	0	0	0	0	0	0	0	0	0	0	0	0	0	0	0	0	0	0	0	0	0	0
464	Bone morphogenetic protein 1 OS=Homo sapiens GN=BMP1 PE=1 SV=2	BMP1_HUMAN	111	6.89	Homo sapiens	0	2	0	0	0	0	0	0	0	0	0	0	0	0	0	0	0.032	0	0	0	0	0	0	0	0	0	0	0	0	0	0	2	0	0	0	0	0	0	0	0	0	0	0	0
465	Rho-associated protein kinase 2 OS=Homo sapiens GN=ROCK2 PE=1 SV=4	ROCK2_HUMAN	161	5.84	Homo sapiens	0	0	0	0	0	0	0	0	0	0	0	0	0	0	0	0	0	0	0	0	0	0	0	0	0	0	0	0	0	0	0	0	0	0	0	0	0	0	0	0	0	0	0	0
466	Four and a half LIM domains protein 1 OS=Homo sapiens GN=FHL1 PE=1 SV=4	FHL1_HUMAN	36	9.15	Homo sapiens	0	0	0	0	0	0	0	0	0	0	0	0	0	0	0	0	0	0	0	0	0	0	0	0	0	0	0	0	0	0	0	0	0	0	0	0	0	0	0	0	0	0	0	0
467	Nucleosome assembly protein 1-like 1 OS=Homo sapiens GN=NAP1L1 PE=1 SV=1	NP1L1_HUMAN	45	4.09	Homo sapiens	0	0	0	0	0	0	0	0	0	0	0	0	0	0	0	0	0	0	0	0	0	0	0	0	0	0	0	0	0	0	0	0	0	0	0	0	0	0	0	0	0	0	0	0
468	Neutrophil gelatinase-associated lipocalin OS=Homo sapiens GN=LCN2 PE=1 SV=2	NGAL_HUMAN	23	9.24	Homo sapiens	0	0	0	0	0	0	3	3	0	0	0	0	0	0	0	0	0	0	0	0	0	0.19	0.18	0	0	0	0	0	0	0	0	0	0	0	0	0	3	3	0	0	0	0	0	0
469	Dihydropyrimidinase-related protein 2 OS=Homo sapiens GN=DPYSL2 PE=1 SV=1	DPYL2_HUMAN	62	6.33	Homo sapiens	0	0	0	0	0	0	0	0	0	0	0	0	0	0	0	0	0	0	0	0	0	0	0	0	0	0	0	0	0	0	0	0	0	0	0	0	0	0	0	0	0	0	0	0
470	Protein S100-A11 OS=Homo sapiens GN=S100A11 PE=1 SV=2	S10AB_HUMAN	12	7.25	Homo sapiens	0	0	0	0	0	0	2	2	2	0	0	0	0	0	0	0	0	0	0	0	0	0.23	0.23	0.23	0	0	0	0	0	0	0	0	0	0	0	0	2	2	2	0	0	0	0	0
471	Protein diaphanous homolog 1 OS=Homo sapiens GN=DIAPH1 PE=1 SV=2	DIAP1_HUMAN	141	5.07	Homo sapiens	0	0	0	0	0	0	0	0	0	0	0	0	0	0	0	0	0	0	0	0	0	0	0	0	0	0	0	0	0	0	0	0	0	0	0	0	0	0	0	0	0	0	0	0
472	Trypsin-2 OS=Homo sapiens GN=PRSS2 PE=1 SV=1	TRY2_HUMAN	26	4.53	Homo sapiens	0	0	0	0	0	0	0	0	0	0	0	0	0	0	0	0	0	0	0	0	0	0	0	0	0	0	0	0	0	0	0	0	0	0	0	0	0	0	0	0	0	0	0	0
473	14-3-3 protein sigma OS=Homo sapiens GN=SFN PE=1 SV=1	1433S_HUMAN	28	4.39	Homo sapiens	0	0	0	0	0	0	3	5	6	0	0	0	0	0	0	0	0	0	0	0	0	0.13	0.15	0.2	0	0	0	0	0	0	0	0	0	0	0	0	2	3	4	0	0	0	0	0
474	Osteopontin OS=Homo sapiens GN=SPP1 PE=1 SV=1	OSTP_HUMAN	35	4.15	Homo sapiens	0	0	0	0	0	0	0	0	0	0	0	0	0	0	0	0	0	0	0	0	0	0	0	0	0	0	0	0	0	0	0	0	0	0	0	0	0	0	0	0	0	0	0	0
475	Inverted formin-2 OS=Homo sapiens GN=INF2 PE=1 SV=2	INF2_HUMAN	136	5.03	Homo sapiens	0	0	0	0	0	0	0	0	0	0	0	0	0	0	0	0	0	0	0	0	0	0	0	0	0	0	0	0	0	0	0	0	0	0	0	0	0	0	0	0	0	0	0	0
476	T-complex protein 1 subunit theta OS=Homo sapiens GN=CCT8 PE=1 SV=4	TCPQ_HUMAN	60	5.3	Homo sapiens	0	0	0	0	0	0	0	0	0	0	0	0	0	0	0	0	0	0	0	0	0	0	0	0	0	0	0	0	0	0	0	0	0	0	0	0	0	0	0	0	0	0	0	0
477	Brain acid soluble protein 1 OS=Homo sapiens GN=BASP1 PE=1 SV=2	BASP1_HUMAN	23	4.3	Homo sapiens	0	0	0	0	0	0	0	0	0	0	0	0	0	0	0	0	0	0	0	0	0	0	0	0	0	0	0	0	0	0	0	0	0	0	0	0	0	0	0	0	0	0	0	0
478	Protein phosphatase 1A OS=Homo sapiens GN=PPM1A PE=1 SV=1	PPM1A_HUMAN	42	5.02	Homo sapiens	0	0	0	0	0	0	0	0	0	0	0	0	0	0	0	0	0	0	0	0	0	0	0	0	0	0	0	0	0	0	0	0	0	0	0	0	0	0	0	0	0	0	0	0
479	Complement C1r subcomponent-like protein OS=Homo sapiens GN=C1RL PE=1 SV=2	C1RL_HUMAN	53	7.2	Homo sapiens	0	0	0	0	0	0	0	0	0	0	0	0	0	0	0	0	0	0	0	0	0	0	0	0	0	0	0	0	0	0	0	0	0	0	0	0	0	0	0	0	0	0	0	0
480	Plakophilin-1 OS=Homo sapiens GN=PKP1 PE=1 SV=2	PKP1_HUMAN	83	9.41	Homo sapiens	0	0	0	0	0	0	2	0	3	0	0	0	0	0	0	0	0	0	0	0	0	0.04	0	0.055	0	0	0	0	0	0	0	0	0	0	0	0	2	0	3	0	0	0	0	0
481	Prelamin-A/C OS=Homo sapiens GN=LMNA PE=1 SV=1	LMNA_HUMAN	74	7.01	Homo sapiens	0	0	0	0	0	0	0	2	0	0	0	0	0	0	0	0	0	0	0	0	0	0	0.033	0	0	0	0	0	0	0	0	0	0	0	0	0	0	2	0	0	0	0	0	0
482	Extended synaptotagmin-1 OS=Homo sapiens GN=ESYT1 PE=1 SV=1	ESYT1_HUMAN	123	5.61	Homo sapiens	0	0	0	0	0	0	0	0	0	0	0	0	0	0	0	0	0	0	0	0	0	0	0	0	0	0	0	0	0	0	0	0	0	0	0	0	0	0	0	0	0	0	0	0
483	Late cornified envelope protein 1B OS=Homo sapiens GN=LCE1B PE=1 SV=1	LCE1B_HUMAN	12	8.4	Homo sapiens	0	0	0	0	0	0	0	3	0	0	0	0	0	0	0	0	0	0	0	0	0	0	0.3	0	0	0	0	0	0	0	0	0	0	0	0	0	0	3	0	0	0	0	0	0
484	Insulin-like growth factor-binding protein 1 OS=Homo sapiens GN=IGFBP1 PE=1 SV=1	IBP1_HUMAN	28	4.86	Homo sapiens	0	0	0	0	0	0	0	0	0	0	0	0	0	0	0	0	0	0	0	0	0	0	0	0	0	0	0	0	0	0	0	0	0	0	0	0	0	0	0	0	0	0	0	0
485	Ras-related protein Rab-14 OS=Homo sapiens GN=RAB14 PE=1 SV=4	RAB14_HUMAN	24	6.13	Homo sapiens	0	0	0	0	0	0	0	0	0	0	0	0	0	0	0	0	0	0	0	0	0	0	0	0	0	0	0	0	0	0	0	0	0	0	0	0	0	0	0	0	0	0	0	0
486	Annexin A11 OS=Homo sapiens GN=ANXA11 PE=1 SV=1	ANX11_HUMAN	54	7.77	Homo sapiens	0	0	0	0	0	0	0	0	0	0	0	0	0	0	0	0	0	0	0	0	0	0	0	0	0	0	0	0	0	0	0	0	0	0	0	0	0	0	0	0	0	0	0	0
487	Drebrin-like protein OS=Homo sapiens GN=DBNL PE=1 SV=1	DBNL_HUMAN	48	4.72	Homo sapiens	0	0	0	0	0	0	0	0	0	0	0	0	0	0	0	0	0	0	0	0	0	0	0	0	0	0	0	0	0	0	0	0	0	0	0	0	0	0	0	0	0	0	0	0
488	Ras-related protein Rab-8A OS=Homo sapiens GN=RAB8A PE=1 SV=1	RAB8A_HUMAN	24	9.54	Homo sapiens	0	0	0	0	0	0	0	0	0	0	0	0	0	0	0	0	0	0	0	0	0	0	0	0	0	0	0	0	0	0	0	0	0	0	0	0	0	0	0	0	0	0	0	0
489	Dermatopontin OS=Homo sapiens GN=DPT PE=1 SV=2	DERM_HUMAN	24	4.44	Homo sapiens	0	0	0	0	0	0	0	0	0	0	0	0	0	0	0	0	0	0	0	0	0	0	0	0	0	0	0	0	0	0	0	0	0	0	0	0	0	0	0	0	0	0	0	0
490	Alpha-2-macroglobulin-like protein 1 OS=Homo sapiens GN=A2ML1 PE=1 SV=3	A2ML1_HUMAN	161	5.47	Homo sapiens	0	0	0	0	0	0	2	2	2	0	0	0	0	0	0	0	0	0	0	0	0	0.02	0.02	0.02	0	0	0	0	0	0	0	0	0	0	0	0	2	2	2	0	0	0	0	0
491	Transforming growth factor beta-1-induced transcript 1 protein OS=Homo sapiens GN=TGFB1I1 PE=1 SV=2	TGFI1_HUMAN	50	7.03	Homo sapiens	0	0	0	0	0	0	0	0	0	0	0	0	0	0	0	0	0	0	0	0	0	0	0	0	0	0	0	0	0	0	0	0	0	0	0	0	0	0	0	0	0	0	0	0
492	ATPase inhibitor, mitochondrial OS=Homo sapiens GN=ATPIF1 PE=1 SV=1	ATIF1_HUMAN	12	10.05	Homo sapiens	0	0	0	0	0	0	0	0	0	0	0	0	0	0	0	0	0	0	0	0	0	0	0	0	0	0	0	0	0	0	0	0	0	0	0	0	0	0	0	0	0	0	0	0
493	Protocadherin Fat 2 OS=Homo sapiens GN=FAT2 PE=1 SV=2	FAT2_HUMAN	479	4.79	Homo sapiens	0	0	0	0	0	0	0	0	0	0	0	0	0	0	0	0	0	0	0	0	0	0	0	0	0	0	0	0	0	0	0	0	0	0	0	0	0	0	0	0	0	0	0	0
494	72 kDa type IV collagenase OS=Homo sapiens GN=MMP2 PE=1 SV=2	MMP2_HUMAN	74	5.09	Homo sapiens	0	0	0	0	0	0	0	0	0	0	0	0	0	0	0	0	0	0	0	0	0	0	0	0	0	0	0	0	0	0	0	0	0	0	0	0	0	0	0	0	0	0	0	0
495	Poly(rC)-binding protein 1 OS=Homo sapiens GN=PCBP1 PE=1 SV=2	PCBP1_HUMAN	37	7.11	Homo sapiens	0	0	0	0	0	0	0	0	0	0	0	0	0	0	0	0	0	0	0	0	0	0	0	0	0	0	0	0	0	0	0	0	0	0	0	0	0	0	0	0	0	0	0	0
496	Glutamine synthetase OS=Homo sapiens GN=GLUL PE=1 SV=4	GLNA_HUMAN	42	6.88	Homo sapiens	0	0	0	0	0	0	2	2	2	0	0	0	0	0	0	0	0	0	0	0	0	0.072	0.07	0.07	0	0	0	0	0	0	0	0	0	0	0	0	2	2	2	0	0	0	0	0
497	Protein POF1B OS=Homo sapiens GN=POF1B PE=1 SV=3	POF1B_HUMAN	68	6.28	Homo sapiens	0	0	0	0	0	0	0	2	0	0	0	0	0	0	0	0	0	0	0	0	0	0	0.044	0	0	0	0	0	0	0	0	0	0	0	0	0	0	2	0	0	0	0	0	0
498	Cornifin-A OS=Homo sapiens GN=SPRR1A PE=1 SV=2	SPR1A_HUMAN	10	8.6	Homo sapiens	0	0	0	0	0	0	2	0	2	0	0	0	0	0	0	0	0	0	0	0	0	0.35	0	0.35	0	0	0	0	0	0	0	0	0	0	0	0	2	0	2	0	0	0	0	0
499	Voltage-dependent anion-selective channel protein 1 OS=Homo sapiens GN=VDAC1 PE=1 SV=2	VDAC1_HUMAN	31	8.89	Homo sapiens	0	0	0	0	0	0	3	0	0	0	0	0	0	0	0	0	0	0	0	0	0	0.13	0	0	0	0	0	0	0	0	0	0	0	0	0	0	2	0	0	0	0	0	0	0
500	Platelet-activating factor acetylhydrolase OS=Homo sapiens GN=PLA2G7 PE=1 SV=1	PAFA_HUMAN	50	7.61	Homo sapiens	0	0	0	0	0	0	0	0	0	0	0	0	0	0	0	0	0	0	0	0	0	0	0	0	0	0	0	0	0	0	0	0	0	0	0	0	0	0	0	0	0	0	0	0
501	Sorcin OS=Homo sapiens GN=SRI PE=1 SV=1	SORCN_HUMAN	22	5.2	Homo sapiens	0	0	0	0	0	0	0	0	0	0	0	0	0	0	0	0	0	0	0	0	0	0	0	0	0	0	0	0	0	0	0	0	0	0	0	0	0	0	0	0	0	0	0	0
502	Proteasome subunit beta type-1 OS=Homo sapiens GN=PSMB1 PE=1 SV=2	PSB1_HUMAN	26	8.3	Homo sapiens	0	0	0	0	0	0	0	0	0	0	0	0	0	0	0	0	0	0	0	0	0	0	0	0	0	0	0	0	0	0	0	0	0	0	0	0	0	0	0	0	0	0	0	0
503	NAD(P) transhydrogenase, mitochondrial OS=Homo sapiens GN=NNT PE=1 SV=3	NNTM_HUMAN	114	8.21	Homo sapiens	0	0	0	0	0	0	0	0	0	0	0	0	0	0	0	0	0	0	0	0	0	0	0	0	0	0	0	0	0	0	0	0	0	0	0	0	0	0	0	0	0	0	0	0
504	Hexokinase-1 OS=Homo sapiens GN=HK1 PE=1 SV=3	HXK1_HUMAN	102	6.78	Homo sapiens	0	0	0	0	0	0	0	0	0	0	0	0	0	0	0	0	0	0	0	0	0	0	0	0	0	0	0	0	0	0	0	0	0	0	0	0	0	0	0	0	0	0	0	0
505	Minor histocompatibility protein HA-1 OS=Homo sapiens GN=HMHA1 PE=1 SV=2	HMHA1_HUMAN	125	6	Homo sapiens	0	0	0	0	0	0	0	0	0	0	0	0	0	0	0	0	0	0	0	0	0	0	0	0	0	0	0	0	0	0	0	0	0	0	0	0	0	0	0	0	0	0	0	0
506	Microtubule-associated protein 1A OS=Homo sapiens GN=MAP1A PE=1 SV=6	MAP1A_HUMAN	30	4.85	Homo sapiens	0	0	0	0	0	0	0	0	0	0	0	0	0	0	0	0	0	0	0	0	0	0	0	0	0	0	0	0	0	0	0	0	0	0	0	0	0	0	0	0	0	0	0	0
507	Grancalcin OS=Homo sapiens GN=GCA PE=1 SV=2	GRAN_HUMAN	24	4.82	Homo sapiens	0	0	0	0	0	0	0	0	0	0	0	0	0	0	0	0	0	0	0	0	0	0	0	0	0	0	0	0	0	0	0	0	0	0	0	0	0	0	0	0	0	0	0	0
508	Tyrosine-protein kinase BTK OS=Homo sapiens GN=BTK PE=1 SV=3	BTK_HUMAN	76	7.86	Homo sapiens	0	0	0	0	0	0	0	0	0	0	0	0	0	0	0	0	0	0	0	0	0	0	0	0	0	0	0	0	0	0	0	0	0	0	0	0	0	0	0	0	0	0	0	0
509	Involucrin OS=Homo sapiens GN=IVL PE=1 SV=2	INVO_HUMAN	68	4.3	Homo sapiens	0	0	0	0	0	0	0	2	2	0	0	0	0	0	0	0	0	0	0	0	0	0	0.044	0.044	0	0	0	0	0	0	0	0	0	0	0	0	0	2	2	0	0	0	0	0
510	Late cornified envelope protein 2B OS=Homo sapiens GN=LCE2B PE=2 SV=1	LCE2B_HUMAN	11	8.13	Homo sapiens	0	0	0	0	0	0	2	2	0	0	0	0	0	0	0	0	0	0	0	0	0	0.39	0.39	0	0	0	0	0	0	0	0	0	0	0	0	0	2	2	0	0	0	0	0	0
511	Cellular retinoic acid-binding protein 2 OS=Homo sapiens GN=CRABP2 PE=1 SV=2	RABP2_HUMAN	16	5.07	Homo sapiens	0	0	0	0	0	0	0	0	2	0	0	0	0	0	0	0	0	0	0	0	0	0	0	0.28	0	0	0	0	0	0	0	0	0	0	0	0	0	0	2	0	0	0	0	0
512	Integrin alpha-2 OS=Homo sapiens GN=ITGA2 PE=1 SV=1	ITA2_HUMAN	129	4.95	Homo sapiens	0	0	0	0	0	0	0	0	0	0	0	0	0	0	0	0	0	0	0	0	0	0	0	0	0	0	0	0	0	0	0	0	0	0	0	0	0	0	0	0	0	0	0	0
513	Serine/threonine-protein phosphatase 2A 65 kDa regulatory subunit A alpha isoform OS=Homo sapiens GN=PPP2R1A PE=1 SV=4	2AAA_HUMAN	65	4.75	Homo sapiens	0	0	0	0	0	0	0	0	0	0	0	0	0	0	0	0	0	0	0	0	0	0	0	0	0	0	0	0	0	0	0	0	0	0	0	0	0	0	0	0	0	0	0	0
514	Ras-related protein Rab-5C OS=Homo sapiens GN=RAB5C PE=1 SV=2	RAB5C_HUMAN	23	8.61	Homo sapiens	0	0	0	0	0	0	0	0	0	0	0	0	0	0	0	0	0	0	0	0	0	0	0	0	0	0	0	0	0	0	0	0	0	0	0	0	0	0	0	0	0	0	0	0
515	Protein S100-A2 OS=Homo sapiens GN=S100A2 PE=1 SV=3	S10A2_HUMAN	11	4.42	Homo sapiens	0	0	0	0	0	0	0	0	3	0	0	0	0	0	0	0	0	0	0	0	0	0	0	0.28	0	0	0	0	0	0	0	0	0	0	0	0	0	0	3	0	0	0	0	0
516	RAS guanyl-releasing protein 2 OS=Homo sapiens GN=RASGRP2 PE=1 SV=1	GRP2_HUMAN	69	7.85	Homo sapiens	0	0	0	0	0	0	0	0	0	0	0	0	0	0	0	0	0	0	0	0	0	0	0	0	0	0	0	0	0	0	0	0	0	0	0	0	0	0	0	0	0	0	0	0
517	Kallikrein-10 OS=Homo sapiens GN=KLK10 PE=1 SV=3	KLK10_HUMAN	30	8.67	Homo sapiens	0	0	0	0	0	0	0	0	2	0	0	0	0	0	0	0	0	0	0	0	0	0	0	0.098	0	0	0	0	0	0	0	0	0	0	0	0	0	0	2	0	0	0	0	0
518	Dynein light chain 1, cytoplasmic OS=Homo sapiens GN=DYNLL1 PE=1 SV=1	DYL1_HUMAN	10	7.5	Homo sapiens	0	0	0	0	0	0	0	0	2	0	0	0	0	0	0	0	0	0	0	0	0	0	0	0.27	0	0	0	0	0	0	0	0	0	0	0	0	0	0	2	0	0	0	0	0
519	Hemoglobin subunit gamma-1 OS=Homo sapiens GN=HBG1 PE=1 SV=2	HBG1_HUMAN	16	7.23	Homo sapiens	0	0	0	0	0	6	0	0	0	0	0	0	0	0	0	0	0	0	0	0	0.27	0	0	0	0	0	0	0	0	0	0	0	0	0	0	2	0	0	0	0	0	0	0	0
520	Serpin B13 OS=Homo sapiens GN=SERPINB13 PE=1 SV=2	SPB13_HUMAN	44	5.47	Homo sapiens	0	0	0	0	0	0	0	2	0	0	0	0	0	0	0	0	0	0	0	0	0	0	0.051	0	0	0	0	0	0	0	0	0	0	0	0	0	0	2	0	0	0	0	0	0
521	Thymidine phosphorylase OS=Homo sapiens GN=TYMP PE=1 SV=2	TYPH_HUMAN	50	5.19	Homo sapiens	0	0	0	0	0	0	2	0	0	0	0	0	0	0	0	0	0	0	0	0	0	0.06	0	0	0	0	0	0	0	0	0	0	0	0	0	0	2	0	0	0	0	0	0	0
522	Prothymosin alpha OS=Homo sapiens GN=PTMA PE=1 SV=2	PTMA_HUMAN	12	3.41	Homo sapiens	0	0	0	0	0	0	0	0	0	0	0	0	0	0	0	0	0	0	0	0	0	0	0	0	0	0	0	0	0	0	0	0	0	0	0	0	0	0	0	0	0	0	0	0
523	Thrombospondin-2 OS=Homo sapiens GN=THBS2 PE=1 SV=2	TSP2_HUMAN	130	4.41	Homo sapiens	0	0	0	0	0	0	0	0	0	0	0	0	0	0	0	0	0	0	0	0	0	0	0	0	0	0	0	0	0	0	0	0	0	0	0	0	0	0	0	0	0	0	0	0
524	cAMP-dependent protein kinase type I-alpha regulatory subunit OS=Homo sapiens GN=PRKAR1A PE=1 SV=1	KAP0_HUMAN	43	5	Homo sapiens	0	0	0	0	0	0	0	0	0	0	0	0	0	0	0	0	0	0	0	0	0	0	0	0	0	0	0	0	0	0	0	0	0	0	0	0	0	0	0	0	0	0	0	0
[truncated: 278 more columns]

## Sheet: RPA by 5 individ
#DOTAP, Samples Report created on 01/07/2016						DOTAP_CTRL
						Spectral counts															Spectral counts / MW															RPA%
						DOTAP_CTRL_1			DOTAP_CTRL_2			DOTAP_CTRL_3			DOTAP_CTRL_4			DOTAP_CTRL_5																		91.2848	75.1743	75.545	84.4136	69.1717	84.3547	94.8444	103.396	100.867	89.6443	97.9746	101.652	99.1927	98.249
#	Identified Proteins (524)	Accession Number	Molecular Weight /kDa	pI	Taxonomy	2016-02-23_DOTAP_DOPE_CTRL_A_01_160223142213	2016-02-29_DOTAP_DOPE_CTRL_A_02	2016-02-29_DOTAP_DOPE_CTRL_A_03	2016-02-29_DOTAP_DOPE_CTRL_B_01	2016-02-29_DOTAP_DOPE_CTRL_B_02	2016-02-29_DOTAP_DOPE_CTRL_B_03	2016-02-29_DOTAP_DOPE_CTRL_C_01	2016-02-29_DOTAP_DOPE_CTRL_C_02	2016-02-29_DOTAP_DOPE_CTRL_C_03	2016-06-17_DOTAP_DOPE_CTRL_D_01	2016-06-17_DOTAP_DOPE_CTRL_D_02	2016-06-17_DOTAP_DOPE_CTRL_D_03	2016-06-17_DOTAP_DOPE_CTRL_E_01	2016-06-17_DOTAP_DOPE_CTRL_E_02	2016-06-17_DOTAP_DOPE_CTRL_E_03	2016-02-23_DOTAP_DOPE_CTRL_A_01_160223142213	2016-02-29_DOTAP_DOPE_CTRL_A_02	2016-02-29_DOTAP_DOPE_CTRL_A_03	2016-02-29_DOTAP_DOPE_CTRL_B_01	2016-02-29_DOTAP_DOPE_CTRL_B_02	2016-02-29_DOTAP_DOPE_CTRL_B_03	2016-02-29_DOTAP_DOPE_CTRL_C_01	2016-02-29_DOTAP_DOPE_CTRL_C_02	2016-02-29_DOTAP_DOPE_CTRL_C_03	2016-06-17_DOTAP_DOPE_CTRL_D_01	2016-06-17_DOTAP_DOPE_CTRL_D_02	2016-06-17_DOTAP_DOPE_CTRL_D_03	2016-06-17_DOTAP_DOPE_CTRL_E_01	2016-06-17_DOTAP_DOPE_CTRL_E_02	2016-06-17_DOTAP_DOPE_CTRL_E_03	2016-02-23_DOTAP_DOPE_CTRL_A_01_160223142213	2016-02-29_DOTAP_DOPE_CTRL_A_02	2016-02-29_DOTAP_DOPE_CTRL_A_03	2016-02-29_DOTAP_DOPE_CTRL_B_01	2016-02-29_DOTAP_DOPE_CTRL_B_02	2016-02-29_DOTAP_DOPE_CTRL_B_03	2016-02-29_DOTAP_DOPE_CTRL_C_01	2016-02-29_DOTAP_DOPE_CTRL_C_02	2016-02-29_DOTAP_DOPE_CTRL_C_03	2016-06-17_DOTAP_DOPE_CTRL_D_01	2016-06-17_DOTAP_DOPE_CTRL_D_02	2016-06-17_DOTAP_DOPE_CTRL_D_03	2016-06-17_DOTAP_DOPE_CTRL_E_01	2016-06-17_DOTAP_DOPE_CTRL_E_02
1	Apolipoprotein B-100 OS=Homo sapiens GN=APOB PE=1 SV=2	APOB_HUMAN	516	7.04	Homo sapiens	53	47	45	71	50	73	56	61	60	707	782	780	757	853	854	0.102713	0.0910853	0.0872093	0.137597	0.0968992	0.141473	0.108527	0.118217	0.116279	1.37016	1.5155	1.51163	1.46705	1.6531	1.65504	0.00112519	0.00121165	0.0011544	0.00163003	0.00140085	0.00167712	0.00114427	0.00114334	0.0011528	0.0152844	0.0154683	0.0148706	0.0147899	0.0168256
2	Serum albumin OS=Homo sapiens GN=ALB PE=1 SV=2	ALBU_HUMAN	69	6.21	Homo sapiens	170	142	150	138	117	138	192	196	197	313	344	392	402	297	305	2.46377	2.05797	2.17391	2	1.69565	2	2.78261	2.84058	2.85507	4.53623	4.98551	5.68116	5.82609	4.30435	4.42029	0.0269899	0.027376	0.0287764	0.0236929	0.0245137	0.0237094	0.0293387	0.0274728	0.0283053	0.0506026	0.0508857	0.0558883	0.058735	0.0438106
3	Vitronectin OS=Homo sapiens GN=VTN PE=1 SV=1	VTNC_HUMAN	54	5.54	Homo sapiens	240	157	163	175	148	172	202	235	229	298	306	354	327	300	300	4.44444	2.90741	3.01852	3.24074	2.74074	3.18519	3.74074	4.35185	4.24074	5.51852	5.66667	6.55556	6.05556	5.55556	5.55556	0.0486877	0.0386755	0.0399565	0.0383912	0.0396223	0.0377594	0.0394408	0.0420891	0.0420429	0.0615602	0.0578381	0.0644902	0.0610484	0.0565457
4	Prothrombin OS=Homo sapiens GN=F2 PE=1 SV=2	THRB_HUMAN	70	5.7	Homo sapiens	384	343	361	403	368	384	353	405	398	154	163	166	171	147	152	5.48571	4.9	5.15714	5.75714	5.25714	5.48571	5.04286	5.78571	5.68571	2.2	2.32857	2.37143	2.44286	2.1	2.17143	0.0600945	0.0651818	0.0682658	0.0682016	0.0760014	0.0650315	0.0531698	0.0559568	0.0563684	0.0245414	0.0237671	0.0233289	0.0246274	0.0213743
5	Complement C4-A OS=Homo sapiens GN=C4A PE=1 SV=2	CO4A_HUMAN	193	7.08	Homo sapiens	453	316	328	418	351	431	415	455	468	89	89	85	83	76	75	2.34715	1.63731	1.69948	2.1658	1.81865	2.23316	2.15026	2.35751	2.42487	0.46114	0.46114	0.440415	0.430052	0.393782	0.388601	0.0257124	0.0217801	0.0224963	0.025657	0.0262919	0.0264735	0.0226715	0.0228008	0.0240403	0.00514411	0.00470673	0.00433257	0.00433552	0.004008
6	Complement C3 OS=Homo sapiens GN=C3 PE=1 SV=2	CO3_HUMAN	187	6.34	Homo sapiens	69	63	60	79	66	87	72	73	74	190	193	201	190	233	231	0.368984	0.336898	0.320856	0.42246	0.352941	0.465241	0.385027	0.390374	0.395722	1.01604	1.03209	1.07487	1.01604	1.24599	1.23529	0.00404212	0.00448156	0.00424721	0.00500464	0.00510239	0.00551529	0.00405956	0.00377552	0.00392321	0.0113342	0.0105342	0.010574	0.0102431	0.012682
7	C4b-binding protein alpha chain OS=Homo sapiens GN=C4BPA PE=1 SV=2	C4BPA_HUMAN	67	7.31	Homo sapiens	329	288	327	308	279	320	292	324	330	150	176	182	177	135	147	4.91045	4.29851	4.8806	4.59701	4.16418	4.77612	4.35821	4.83582	4.92537	2.23881	2.62687	2.71642	2.64179	2.01493	2.19403	0.0537926	0.0571805	0.0646051	0.0544582	0.0602006	0.0566195	0.0459512	0.0467699	0.0488304	0.0249743	0.0268117	0.0267227	0.0266329	0.0205084
8	Clusterin OS=Homo sapiens GN=CLU PE=1 SV=1	CLUS_HUMAN	52	6.21	Homo sapiens	192	175	198	178	156	178	178	201	194	54	54	60	55	50	48	3.69231	3.36538	3.80769	3.42308	3	3.42308	3.42308	3.86538	3.73077	1.03846	1.03846	1.15385	1.05769	0.961538	0.923077	0.0404482	0.0447677	0.0504029	0.0405512	0.0433703	0.0405796	0.0360915	0.0373842	0.036987	0.0115842	0.0105993	0.0113509	0.010663	0.00978675
9	Fibrinogen beta chain OS=Homo sapiens GN=FGB PE=1 SV=2	FIBB_HUMAN	56	8.38	Homo sapiens	68	69	66	53	44	59	65	66	63	57	60	62	61	93	90	1.21429	1.23214	1.17857	0.946429	0.785714	1.05357	1.16071	1.17857	1.125	1.01786	1.07143	1.10714	1.08929	1.66071	1.60714	0.0133022	0.0163905	0.0156009	0.0112118	0.0113589	0.0124898	0.0122381	0.0113986	0.0111533	0.0113544	0.0109358	0.0108915	0.0109815	0.0169031
10	Fibrinogen alpha chain OS=Homo sapiens GN=FGA PE=1 SV=2	FIBA_HUMAN	95	5.87	Homo sapiens	69	57	56	46	40	42	56	63	59	47	51	46	50	68	76	0.726316	0.6	0.589474	0.484211	0.421053	0.442105	0.589474	0.663158	0.621053	0.494737	0.536842	0.484211	0.526316	0.715789	0.8	0.00795659	0.00798145	0.00780294	0.00573617	0.00608707	0.00524103	0.00621517	0.00641376	0.00615715	0.00551889	0.0054794	0.00476342	0.00530599	0.00728546
11	Inter-alpha-trypsin inhibitor heavy chain H2 OS=Homo sapiens GN=ITIH2 PE=1 SV=2	ITIH2_HUMAN	106	6.85	Homo sapiens	69	59	65	78	69	80	54	64	75	41	43	46	44	47	47	0.650943	0.556604	0.613208	0.735849	0.650943	0.754717	0.509434	0.603774	0.707547	0.386792	0.40566	0.433962	0.415094	0.443396	0.443396	0.00713091	0.00740417	0.00811711	0.00871718	0.00941055	0.00894694	0.00537126	0.00583942	0.00701466	0.00431475	0.00414047	0.0042691	0.00418473	0.00451298
12	Inter-alpha-trypsin inhibitor heavy chain H1 OS=Homo sapiens GN=ITIH1 PE=1 SV=3	ITIH1_HUMAN	101	6.78	Homo sapiens	56	47	47	54	46	69	57	54	58	30	37	34	35	30	33	0.554455	0.465347	0.465347	0.534653	0.455446	0.683168	0.564356	0.534653	0.574257	0.29703	0.366337	0.336634	0.346535	0.29703	0.326733	0.00607391	0.00619023	0.00615986	0.00633373	0.00658428	0.00809876	0.00595034	0.00517093	0.00569322	0.00331343	0.0037391	0.00331163	0.00349355	0.00302323
13	Apolipoprotein A-I OS=Homo sapiens GN=APOA1 PE=1 SV=1	APOA1_HUMAN	31	5.5	Homo sapiens	35	29	29	25	30	31	33	28	36	69	68	76	79	81	73	1.12903	0.935484	0.935484	0.806452	0.967742	1	1.06452	0.903226	1.16129	2.22581	2.19355	2.45161	2.54839	2.6129	2.35484	0.0123682	0.0124442	0.0123831	0.00955357	0.0139904	0.0118547	0.0112238	0.00873559	0.0115131	0.0248293	0.022389	0.0241177	0.0256913	0.0265947
14	Apolipoprotein A-IV OS=Homo sapiens GN=APOA4 PE=1 SV=3	APOA4_HUMAN	45	5.05	Homo sapiens	159	150	146	165	155	164	127	132	132	49	47	46	46	43	42	3.53333	3.33333	3.24444	3.66667	3.44444	3.64444	2.82222	2.93333	2.93333	1.08889	1.04444	1.02222	1.02222	0.955556	0.933333	0.0387067	0.0443414	0.0429472	0.0434369	0.0497956	0.0432038	0.0297564	0.0283699	0.0290812	0.0121468	0.0106604	0.0100561	0.0103054	0.00972585
15	Fibronectin OS=Homo sapiens GN=FN1 PE=1 SV=4	FINC_HUMAN	263	5.45	Homo sapiens	18	14	18	9	11	12	17	18	16	47	49	52	49	64	73	0.0684411	0.0532319	0.0684411	0.0342205	0.0418251	0.0456274	0.0646388	0.0684411	0.0608365	0.178707	0.186312	0.197719	0.186312	0.243346	0.277567	0.000749753	0.000708113	0.000905964	0.000405391	0.000604656	0.000540899	0.000681525	0.000661931	0.000603136	0.00199351	0.00190163	0.00194505	0.00187828	0.00247683
16	Hyaluronan-binding protein 2 OS=Homo sapiens GN=HABP2 PE=1 SV=1	HABP2_HUMAN	63	6.52	Homo sapiens	63	46	53	59	51	69	52	67	65	118	126	123	125	120	100	1	0.730159	0.84127	0.936508	0.809524	1.09524	0.825397	1.06349	1.03175	1.87302	2	1.95238	1.98413	1.90476	1.5873	0.0109547	0.00971287	0.011136	0.0110943	0.0117031	0.0129837	0.00870265	0.0102856	0.0102288	0.0208939	0.0204135	0.0192065	0.0200027	0.0193871
17	Alpha-1-antitrypsin OS=Homo sapiens GN=SERPINA1 PE=1 SV=3	A1AT_HUMAN	47	5.31	Homo sapiens	56	48	48	52	49	55	48	46	44	46	50	53	49	46	47	1.19149	1.02128	1.02128	1.10638	1.04255	1.17021	1.02128	0.978723	0.93617	0.978723	1.06383	1.12766	1.04255	0.978723	1	0.0130524	0.0135854	0.0135188	0.0131067	0.015072	0.0138725	0.0107679	0.00946577	0.00928124	0.0109179	0.0108582	0.0110933	0.0105104	0.00996166
18	Apolipoprotein E OS=Homo sapiens GN=APOE PE=1 SV=1	APOE_HUMAN	36	5.42	Homo sapiens	81	69	75	85	69	82	69	72	72	62	69	72	69	73	74	2.25	1.91667	2.08333	2.36111	1.91667	2.27778	1.91667	2	2	1.72222	1.91667	2	1.91667	2.02778	2.05556	0.0246481	0.0254963	0.0275774	0.0279707	0.0277088	0.0270024	0.0202085	0.0193431	0.0198281	0.0192117	0.0195629	0.019675	0.0193227	0.0206392
19	Fibrinogen gamma chain OS=Homo sapiens GN=FGG PE=1 SV=3	FIBG_HUMAN	52	5.32	Homo sapiens	37	32	32	30	32	38	36	34	39	39	42	40	40	63	69	0.711538	0.615385	0.615385	0.576923	0.615385	0.730769	0.692308	0.653846	0.75	0.75	0.807692	0.769231	0.769231	1.21154	1.32692	0.00779471	0.0081861	0.00814593	0.00683448	0.00889648	0.00866305	0.00729941	0.0063237	0.00743554	0.0083664	0.0082439	0.0075673	0.00775491	0.0123313
20	Apolipoprotein C-III OS=Homo sapiens GN=APOC3 PE=1 SV=1	APOC3_HUMAN	11	5.04	Homo sapiens	40	43	36	39	24	34	39	41	40	113	146	156	141	130	133	3.63636	3.90909	3.27273	3.54545	2.18182	3.09091	3.54545	3.72727	3.63636	10.2727	13.2727	14.1818	12.8182	11.8182	12.0909	0.0398354	0.0520003	0.0433215	0.042001	0.0315421	0.0366418	0.0373818	0.0360485	0.0360511	0.114594	0.135471	0.139513	0.129225	0.120288
21	Inter-alpha-trypsin inhibitor heavy chain H3 OS=Homo sapiens GN=ITIH3 PE=1 SV=2	ITIH3_HUMAN	100	5.49	Homo sapiens	63	53	50	52	49	76	59	60	52	27	27	25	25	26	27	0.63	0.53	0.5	0.52	0.49	0.76	0.59	0.6	0.52	0.27	0.27	0.25	0.25	0.26	0.27	0.00690148	0.00705028	0.00661857	0.00616014	0.00708382	0.00900957	0.00622072	0.00580293	0.00515531	0.0030119	0.00275582	0.00245937	0.00252035	0.00264634
22	Protein AMBP OS=Homo sapiens GN=AMBP PE=1 SV=1	AMBP_HUMAN	39	6.15	Homo sapiens	85	58	62	57	60	63	71	78	79	17	18	22	16	16	21	2.17949	1.48718	1.58974	1.46154	1.53846	1.61538	1.82051	2	2.02564	0.435897	0.461538	0.564103	0.410256	0.410256	0.538462	0.0238757	0.0197831	0.0210437	0.017314	0.0222412	0.0191499	0.0191947	0.0193431	0.0200823	0.00486252	0.0047108	0.00554935	0.00413595	0.00417568
23	Keratin, type II cytoskeletal 1 OS=Homo sapiens GN=KRT1 PE=1 SV=6	K2C1_HUMAN	66	8.33	Homo sapiens	36	30	30	47	42	49	38	41	46	43	43	38	41	53	51	0.545455	0.454545	0.454545	0.712121	0.636364	0.742424	0.575758	0.621212	0.69697	0.651515	0.651515	0.575758	0.621212	0.80303	0.772727	0.0059753	0.00604655	0.00601688	0.00843609	0.00919977	0.00880122	0.00607055	0.00600808	0.00690979	0.00726778	0.00664984	0.00566401	0.00626268	0.00817342
24	Alpha-2-macroglobulin OS=Homo sapiens GN=A2M PE=1 SV=3	A2MG_HUMAN	163	6.43	Homo sapiens	31	21	20	25	17	29	34	34	35	67	64	56	56	51	52	0.190184	0.128834	0.122699	0.153374	0.104294	0.177914	0.208589	0.208589	0.214724	0.411043	0.392638	0.343558	0.343558	0.312883	0.319018	0.00208341	0.00171381	0.00162419	0.00181694	0.00150776	0.00210912	0.00219928	0.00201738	0.00212878	0.00458527	0.00400755	0.00337975	0.00346354	0.0031846
25	Vitamin K-dependent protein S OS=Homo sapiens GN=PROS1 PE=1 SV=1	PROS_HUMAN	75	5.37	Homo sapiens	92	81	77	92	94	106	88	92	92	52	58	57	54	48	45	1.22667	1.08	1.02667	1.22667	1.25333	1.41333	1.17333	1.22667	1.22667	0.693333	0.773333	0.76	0.72	0.64	0.6	0.0134378	0.0143666	0.0135901	0.0145316	0.0181192	0.0167546	0.0123711	0.0118638	0.0121612	0.00773427	0.0078932	0.00747649	0.0072586	0.00651406
26	Serotransferrin OS=Homo sapiens GN=TF PE=1 SV=3	TRFE_HUMAN	77	7.13	Homo sapiens	40	34	33	19	21	25	52	50	50	73	76	69	70	65	70	0.519481	0.441558	0.428571	0.246753	0.272727	0.324675	0.675325	0.649351	0.649351	0.948052	0.987013	0.896104	0.909091	0.844156	0.909091	0.00569077	0.00587379	0.00567306	0.00292315	0.00394276	0.00384893	0.00712035	0.00628022	0.00643769	0.0105757	0.0100742	0.00881541	0.00916489	0.008592
27	Talin-1 OS=Homo sapiens GN=TLN1 PE=1 SV=3	TLN1_HUMAN	270	5.94	Homo sapiens	70	54	56	22	18	25	60	58	56	0	0	0	0	0	0	0.259259	0.2	0.207407	0.0814815	0.0666667	0.0925926	0.222222	0.214815	0.207407	0	0	0	0	0	0	0.00284011	0.00266048	0.00274548	0.000965265	0.000963785	0.00109766	0.00234302	0.00207759	0.00205625	0	0	0	0	0
28	Myosin-9 OS=Homo sapiens GN=MYH9 PE=1 SV=4	MYH9_HUMAN	227	5.29	Homo sapiens	117	93	93	40	27	42	112	113	107	0	0	0	0	0	0	0.515419	0.409692	0.409692	0.176211	0.118943	0.185022	0.493392	0.497797	0.471366	0	0	0	0	0	0	0.00564627	0.00544989	0.00542314	0.00208748	0.00171953	0.00219338	0.00520212	0.00481447	0.00467314	0	0	0	0	0
29	Apolipoprotein D OS=Homo sapiens GN=APOD PE=1 SV=1	APOD_HUMAN	21	4.79	Homo sapiens	24	30	27	32	27	34	18	20	23	63	64	68	75	66	69	1.14286	1.42857	1.28571	1.52381	1.28571	1.61905	0.857143	0.952381	1.09524	3	3.04762	3.2381	3.57143	3.14286	3.28571	0.0125197	0.0190034	0.0170192	0.0180517	0.0185873	0.0191933	0.00903736	0.009211	0.0108582	0.0334656	0.0311062	0.0318547	0.0360049	0.0319887
30	Kininogen-1 OS=Homo sapiens GN=KNG1 PE=1 SV=2	KNG1_HUMAN	72	6.8	Homo sapiens	48	41	39	35	37	39	33	42	45	25	34	31	29	26	24	0.666667	0.569444	0.541667	0.486111	0.513889	0.541667	0.458333	0.583333	0.625	0.347222	0.472222	0.430556	0.402778	0.361111	0.333333	0.00730315	0.00757498	0.00717012	0.00575868	0.00742918	0.0064213	0.00483248	0.00564174	0.00619628	0.00387333	0.00481984	0.00423559	0.00406056	0.00367547
31	Filamin-A OS=Homo sapiens GN=FLNA PE=1 SV=4	FLNA_HUMAN	281	5.95	Homo sapiens	69	51	52	22	18	21	51	62	54	0	0	0	0	0	0	0.245552	0.181495	0.185053	0.0782918	0.0640569	0.0747331	0.181495	0.220641	0.192171	0	0	0	0	0	0	0.00268995	0.00241432	0.00244958	0.000927479	0.000926057	0.000885938	0.00191361	0.00213394	0.00190519	0	0	0	0	0
32	Ig gamma-1 chain C region OS=Homo sapiens GN=IGHG1 PE=1 SV=1	IGHG1_HUMAN	36	8.31	Homo sapiens	39	40	40	41	34	37	41	46	44	30	35	29	34	35	32	1.08333	1.11111	1.11111	1.13889	0.944444	1.02778	1.13889	1.27778	1.22222	0.833333	0.972222	0.805556	0.944444	0.972222	0.888889	0.0118676	0.0147805	0.0147079	0.0134918	0.0136536	0.012184	0.012008	0.0123581	0.0121172	0.009296	0.00992321	0.00792464	0.00952131	0.00989549
33	Apolipoprotein C-II OS=Homo sapiens GN=APOC2 PE=1 SV=1	APOC2_HUMAN	11	4.36	Homo sapiens	20	20	18	28	16	23	20	21	20	111	117	113	110	115	104	1.81818	1.81818	1.63636	2.54545	1.45455	2.09091	1.81818	1.90909	1.81818	10.0909	10.6364	10.2727	10	10.4545	9.45455	0.0199177	0.0241862	0.0216608	0.0301545	0.021028	0.0247871	0.0191702	0.0184639	0.0180255	0.112566	0.108562	0.101058	0.100814	0.106409
34	Thrombospondin-1 OS=Homo sapiens GN=THBS1 PE=1 SV=2	TSP1_HUMAN	129	4.51	Homo sapiens	40	31	35	24	19	25	39	39	39	7	4	3	5	5	4	0.310078	0.24031	0.271318	0.186047	0.147287	0.193798	0.302326	0.302326	0.302326	0.0542636	0.0310078	0.0232558	0.0387597	0.0387597	0.0310078	0.00339681	0.0031967	0.00359147	0.00220399	0.00212929	0.00229742	0.0031876	0.00292396	0.00299727	0.000605321	0.000316488	0.000228779	0.000390751	0.000394505
35	Ceruloplasmin OS=Homo sapiens GN=CP PE=1 SV=1	CERU_HUMAN	122	5.5	Homo sapiens	13	13	13	18	15	17	11	13	13	39	49	44	43	42	41	0.106557	0.106557	0.106557	0.147541	0.122951	0.139344	0.0901639	0.106557	0.106557	0.319672	0.401639	0.360656	0.352459	0.344262	0.336066	0.00116731	0.00141747	0.00141051	0.00174783	0.00177747	0.00165188	0.000950652	0.00103057	0.00105642	0.00356601	0.00409942	0.00354795	0.00355327	0.00350398
36	Complement factor H OS=Homo sapiens GN=CFH PE=1 SV=4	CFAH_HUMAN	139	6.59	Homo sapiens	28	23	22	11	11	16	18	24	28	23	25	23	22	19	23	0.201439	0.165468	0.158273	0.0791367	0.0791367	0.115108	0.129496	0.172662	0.201439	0.165468	0.179856	0.165468	0.158273	0.136691	0.165468	0.00220671	0.00220112	0.00209509	0.000937487	0.00114406	0.00136457	0.00136536	0.00166991	0.00199707	0.00184582	0.00183574	0.00162779	0.00159561	0.00139127
37	Ig mu chain C region OS=Homo sapiens GN=IGHM PE=1 SV=3	IGHM_HUMAN	49	6.77	Homo sapiens	21	19	18	19	18	23	27	25	28	17	15	13	16	16	18	0.428571	0.387755	0.367347	0.387755	0.367347	0.469388	0.55102	0.510204	0.571429	0.346939	0.306122	0.265306	0.326531	0.326531	0.367347	0.00469488	0.00515808	0.00486262	0.00459351	0.00531065	0.00556445	0.00580973	0.00493446	0.00566517	0.00387017	0.00312451	0.00260995	0.00329188	0.0033235
38	Apolipoprotein A-II OS=Homo sapiens GN=APOA2 PE=1 SV=1	APOA2_HUMAN	11	6.6	Homo sapiens	13	13	12	16	15	17	12	15	14	32	30	52	45	24	27	1.18182	1.18182	1.09091	1.45455	1.36364	1.54545	1.09091	1.36364	1.27273	2.90909	2.72727	4.72727	4.09091	2.18182	2.45455	0.0129465	0.015721	0.0144405	0.0172312	0.0197138	0.0183209	0.0115021	0.0131885	0.0126179	0.0324515	0.0278365	0.0465045	0.041242	0.022207
39	Haptoglobin OS=Homo sapiens GN=HP PE=1 SV=1	HPT_HUMAN	45	6.56	Homo sapiens	21	13	9	16	12	16	22	25	21	35	37	36	37	40	40	0.466667	0.288889	0.2	0.355556	0.266667	0.355556	0.488889	0.555556	0.466667	0.777778	0.822222	0.8	0.822222	0.888889	0.888889	0.0051122	0.00384292	0.00264743	0.00421206	0.00385514	0.004215	0.00515464	0.00537308	0.00462656	0.00867627	0.0083922	0.00786999	0.00828914	0.00904731
40	Keratin, type I cytoskeletal 9 OS=Homo sapiens GN=KRT9 PE=1 SV=3	K1C9_HUMAN	62	4.89	Homo sapiens	13	16	14	22	23	26	16	17	14	31	29	23	28	32	35	0.209677	0.258065	0.225806	0.354839	0.370968	0.419355	0.258065	0.274194	0.225806	0.5	0.467742	0.370968	0.451613	0.516129	0.564516	0.00229696	0.00343288	0.00298903	0.00420357	0.005363	0.00497133	0.00272093	0.00265188	0.00223866	0.0055776	0.00477412	0.00364939	0.00455288	0.00525327
41	Apolipoprotein(a) OS=Homo sapiens GN=LPA PE=1 SV=1	APOA_HUMAN	501	5.77	Homo sapiens	6	3	4	4	6	8	2	4	3	105	106	101	101	113	109	0.011976	0.00598802	0.00798403	0.00798403	0.011976	0.0159681	0.00399202	0.00798403	0.00598802	0.209581	0.211577	0.201597	0.201597	0.225549	0.217565	0.000131194	7.96552e-05	0.000105686	9.45823e-05	0.000173135	0.000189297	4.20902e-05	7.72179e-05	5.93656e-05	0.00233792	0.00215951	0.00198321	0.00203237	0.00229569
42	Serum amyloid A-1 protein OS=Homo sapiens GN=SAA1 PE=1 SV=1	SAA1_HUMAN	14	6.79	Homo sapiens	8	8	7	9	6	9	7	8	9	12	14	13	18	10	13	0.571429	0.571429	0.5	0.642857	0.428571	0.642857	0.5	0.571429	0.642857	0.857143	1	0.928571	1.28571	0.714286	0.928571	0.00625984	0.00760138	0.00661857	0.00761556	0.00619576	0.00762088	0.0052718	0.0055266	0.00637332	0.0095616	0.0102067	0.00913481	0.0129618	0.00727016
43	Complement component C9 OS=Homo sapiens GN=C9 PE=1 SV=2	CO9_HUMAN	63	5.27	Homo sapiens	15	16	14	15	14	16	13	16	13	15	16	13	13	13	14	0.238095	0.253968	0.222222	0.238095	0.222222	0.253968	0.206349	0.253968	0.206349	0.238095	0.253968	0.206349	0.206349	0.206349	0.222222	0.00260827	0.00337839	0.00294159	0.00282058	0.00321262	0.00301072	0.00217566	0.00245627	0.00204576	0.002656	0.00259219	0.00202996	0.00208029	0.00210027
44	Serum paraoxonase/arylesterase 1 OS=Homo sapiens GN=PON1 PE=1 SV=3	PON1_HUMAN	40	4.89	Homo sapiens	33	30	29	32	24	38	33	34	32	25	29	27	27	27	29	0.825	0.75	0.725	0.8	0.6	0.95	0.825	0.85	0.8	0.625	0.725	0.675	0.675	0.675	0.725	0.00903765	0.00997681	0.00959693	0.00947714	0.00867407	0.011262	0.00869846	0.00822081	0.00793124	0.006972	0.00739988	0.0066403	0.00680493	0.0068703
45	Keratin, type I cytoskeletal 10 OS=Homo sapiens GN=KRT10 PE=1 SV=6	K1C10_HUMAN	59	4.88	Homo sapiens	15	12	12	26	25	27	20	23	23	26	24	26	22	27	28	0.254237	0.20339	0.20339	0.440678	0.423729	0.457627	0.338983	0.389831	0.389831	0.440678	0.40678	0.440678	0.372881	0.457627	0.474576	0.0027851	0.00270558	0.0026923	0.00522046	0.00612576	0.00542503	0.0035741	0.00377026	0.0038648	0.00491585	0.00415189	0.00433516	0.00375916	0.00465783
46	Actin, cytoplasmic 2 OS=Homo sapiens GN=ACTG1 PE=1 SV=1	ACTG_HUMAN	42	5.16	Homo sapiens	35	26	28	12	6	8	38	38	43	4	3	2	3	3	2	0.833333	0.619048	0.666667	0.285714	0.142857	0.190476	0.904762	0.904762	1.02381	0.0952381	0.0714286	0.047619	0.0714286	0.0714286	0.047619	0.00912894	0.00823483	0.00882476	0.00338469	0.00206525	0.00225804	0.00953944	0.00875045	0.0101501	0.0010624	0.000729052	0.000468452	0.000720099	0.000727016
47	Complement C1s subcomponent OS=Homo sapiens GN=C1S PE=1 SV=1	C1S_HUMAN	77	4.59	Homo sapiens	21	11	13	14	15	15	11	17	21	3	4	3	2	3	2	0.272727	0.142857	0.168831	0.181818	0.194805	0.194805	0.142857	0.220779	0.272727	0.038961	0.0519481	0.038961	0.025974	0.038961	0.025974	0.00298765	0.00190034	0.00223484	0.0021539	0.00281626	0.00230936	0.00150623	0.00213528	0.00270383	0.000434618	0.00053022	0.000383279	0.000261854	0.000396554
48	Gelsolin OS=Homo sapiens GN=GSN PE=1 SV=1	GELS_HUMAN	86	6.19	Homo sapiens	35	36	31	29	24	29	44	43	45	18	18	20	20	20	18	0.406977	0.418605	0.360465	0.337209	0.27907	0.337209	0.511628	0.5	0.523256	0.209302	0.209302	0.232558	0.232558	0.232558	0.209302	0.00445832	0.00556845	0.00477153	0.00399473	0.00403445	0.00399752	0.0053944	0.00483577	0.00518758	0.00233481	0.00213629	0.00228779	0.00234451	0.00236703
49	Retinol-binding protein 4 OS=Homo sapiens GN=RBP4 PE=1 SV=3	RET4_HUMAN	23	5.85	Homo sapiens	2	2	2	0	0	3	3	2	0	6	5	4	8	4	5	0.0869565	0.0869565	0.0869565	0	0	0.130435	0.130435	0.0869565	0	0.26087	0.217391	0.173913	0.347826	0.173913	0.217391	0.000952585	0.00115673	0.00115106	0	0	0.00154627	0.00137525	0.000841004	0	0.00291005	0.00221885	0.00171087	0.00350657	0.00177013
50	Keratin, type II cytoskeletal 2 epidermal OS=Homo sapiens GN=KRT2 PE=1 SV=2	K22E_HUMAN	65	8.17	Homo sapiens	13	12	18	25	22	23	22	21	19	28	25	24	27	34	32	0.2	0.184615	0.276923	0.384615	0.338462	0.353846	0.338462	0.323077	0.292308	0.430769	0.384615	0.369231	0.415385	0.523077	0.492308	0.00219094	0.00245583	0.00366567	0.00455632	0.00489306	0.00419474	0.0035686	0.00312465	0.00289795	0.00480532	0.00392567	0.0036323	0.00418765	0.00532399
51	Ig alpha-1 chain C region OS=Homo sapiens GN=IGHA1 PE=1 SV=2	IGHA1_HUMAN	38	6.49	Homo sapiens	19	18	16	13	11	16	18	21	22	23	19	20	23	21	20	0.5	0.473684	0.421053	0.342105	0.289474	0.421053	0.473684	0.552632	0.578947	0.605263	0.5	0.526316	0.605263	0.552632	0.526316	0.00547736	0.00630114	0.00557353	0.00405273	0.00418486	0.00499145	0.00499433	0.0053448	0.00573971	0.00675183	0.00510337	0.00517763	0.00610189	0.00562481
52	Ig kappa chain C region OS=Homo sapiens GN=IGKC PE=1 SV=1	IGKC_HUMAN	12	5.68	Homo sapiens	18	22	14	14	8	19	20	20	21	17	22	29	27	27	25	1.5	1.83333	1.16667	1.16667	0.666667	1.58333	1.66667	1.66667	1.75	1.41667	1.83333	2.41667	2.25	2.25	2.08333	0.0164321	0.0243878	0.0154433	0.0138208	0.00963785	0.0187699	0.0175727	0.0161192	0.0173496	0.0158032	0.0187123	0.0237739	0.0226831	0.022901
53	Coagulation factor V OS=Homo sapiens GN=F5 PE=1 SV=4	FA5_HUMAN	252	5.95	Homo sapiens	30	22	22	23	23	35	25	32	22	17	23	19	17	13	11	0.119048	0.0873016	0.0873016	0.0912698	0.0912698	0.138889	0.0992063	0.126984	0.0873016	0.0674603	0.0912698	0.0753968	0.0674603	0.0515873	0.0436508	0.00130413	0.00116132	0.00115562	0.00108122	0.00131947	0.00164649	0.00104599	0.00122813	0.000865512	0.000752533	0.000931567	0.000741715	0.000680093	0.000525067
54	Plasminogen OS=Homo sapiens GN=PLG PE=1 SV=2	PLMN_HUMAN	91	7.25	Homo sapiens	18	15	13	17	18	18	17	18	18	25	32	26	27	17	24	0.197802	0.164835	0.142857	0.186813	0.197802	0.197802	0.186813	0.197802	0.197802	0.274725	0.351648	0.285714	0.296703	0.186813	0.263736	0.00216687	0.00219271	0.00189102	0.00221307	0.00285958	0.00234489	0.00196968	0.00191305	0.00196102	0.00306462	0.00358918	0.00281071	0.00299118	0.00190143
55	Vitamin D-binding protein OS=Homo sapiens GN=GC PE=1 SV=1	VTDB_HUMAN	53	5.21	Homo sapiens	9	4	3	4	6	4	8	8	6	17	17	17	16	15	15	0.169811	0.0754717	0.0566038	0.0754717	0.113208	0.0754717	0.150943	0.150943	0.113208	0.320755	0.320755	0.320755	0.301887	0.283019	0.283019	0.00186024	0.00100396	0.000749272	0.00089407	0.00163662	0.000894694	0.00159149	0.00145986	0.00112235	0.00357808	0.00327386	0.00315542	0.00304344	0.00288063
56	Complement C5 OS=Homo sapiens GN=C5 PE=1 SV=4	CO5_HUMAN	188	6.49	Homo sapiens	3	2	5	0	4	5	3	2	3	27	28	34	31	41	40	0.0159574	0.0106383	0.0265957	0	0.0212766	0.0265957	0.0159574	0.0106383	0.0159574	0.143617	0.148936	0.180851	0.164894	0.218085	0.212766	0.000174809	0.000141515	0.000352052	0	0.000307591	0.000315285	0.000168249	0.000102889	0.000158203	0.00160208	0.00152015	0.00177912	0.00166236	0.00221972
57	von Willebrand factor OS=Homo sapiens GN=VWF PE=1 SV=4	VWF_HUMAN	309	5.15	Homo sapiens	20	18	17	2	2	0	17	16	16	8	8	14	8	13	10	0.0647249	0.0582524	0.0550162	0.00647249	0.00647249	0	0.0550162	0.0517799	0.0517799	0.02589	0.02589	0.0453074	0.02589	0.0420712	0.0323625	0.000709044	0.000774898	0.000728257	7.66759e-05	9.35714e-05	0	0.000580068	0.000500792	0.000513349	0.000288808	0.000264252	0.000445711	0.000261007	0.00042821
58	Coagulation factor IX OS=Homo sapiens GN=F9 PE=1 SV=2	FA9_HUMAN	52	5.16	Homo sapiens	23	20	16	21	14	21	22	23	19	16	22	20	21	18	26	0.442308	0.384615	0.307692	0.403846	0.269231	0.403846	0.423077	0.442308	0.365385	0.307692	0.423077	0.384615	0.403846	0.346154	0.5	0.00484536	0.00511631	0.00407297	0.00478414	0.00389221	0.00478748	0.00446075	0.0042778	0.00362244	0.00343237	0.00431823	0.00378365	0.00407133	0.00352323
59	Transthyretin OS=Homo sapiens GN=TTR PE=1 SV=1	TTHY_HUMAN	16	5.58	Homo sapiens	5	4	6	8	2	6	7	4	4	11	13	12	12	11	12	0.3125	0.25	0.375	0.5	0.125	0.375	0.4375	0.25	0.25	0.6875	0.8125	0.75	0.75	0.6875	0.75	0.00342335	0.0033256	0.00496393	0.00592322	0.0018071	0.00444551	0.00461282	0.00241789	0.00247851	0.0076692	0.00829297	0.00737812	0.00756104	0.00699753
60	Platelet factor 4 OS=Homo sapiens GN=PF4 PE=1 SV=2	PLF4_HUMAN	11	8.78	Homo sapiens	11	8	11	3	6	3	12	11	11	0	0	0	0	0	0	1	0.727273	1	0.272727	0.545455	0.272727	1.09091	1	1	0	0	0	0	0	0	0.0109547	0.00967448	0.0132371	0.00323084	0.00788552	0.0032331	0.0115021	0.00967155	0.00991405	0	0	0	0	0
61	Inter-alpha-trypsin inhibitor heavy chain H4 OS=Homo sapiens GN=ITIH4 PE=1 SV=4	ITIH4_HUMAN	103	6.97	Homo sapiens	2	2	0	3	3	2	2	2	2	20	20	18	19	22	27	0.0194175	0.0194175	0	0.0291262	0.0291262	0.0194175	0.0194175	0.0194175	0.0194175	0.194175	0.194175	0.174757	0.184466	0.213592	0.262136	0.000212713	0.000258299	0	0.000345042	0.000421071	0.000230188	0.00020473	0.000187797	0.000192506	0.00216606	0.00198189	0.00171917	0.00185967	0.00217399
62	Apolipoprotein M OS=Homo sapiens GN=APOM PE=1 SV=2	APOM_HUMAN	21	5.92	Homo sapiens	9	10	9	10	10	7	11	12	11	16	11	14	19	19	13	0.428571	0.47619	0.428571	0.47619	0.47619	0.333333	0.52381	0.571429	0.52381	0.761905	0.52381	0.666667	0.904762	0.904762	0.619048	0.00469488	0.00633448	0.00567306	0.00564116	0.00688418	0.00395157	0.00552283	0.0055266	0.00519307	0.0084992	0.00534638	0.00655833	0.00912125	0.00920886
63	Complement C1r subcomponent OS=Homo sapiens GN=C1R PE=1 SV=2	C1R_HUMAN	80	6.14	Homo sapiens	4	3	3	3	3	4	3	7	5	2	2	2	3	4	4	0.05	0.0375	0.0375	0.0375	0.0375	0.05	0.0375	0.0875	0.0625	0.025	0.025	0.025	0.0375	0.05	0.05	0.000547736	0.00049884	0.000496393	0.000444241	0.000542129	0.000592735	0.000395385	0.00084626	0.000619628	0.00027888	0.000255168	0.000245937	0.000378052	0.000508911
64	Ig gamma-3 chain C region OS=Homo sapiens GN=IGHG3 PE=1 SV=2	IGHG3_HUMAN	41	7.95	Homo sapiens	34	25	28	26	25	26	37	31	26	30	29	30	26	29	27	0.829268	0.609756	0.682927	0.634146	0.609756	0.634146	0.902439	0.756098	0.634146	0.731707	0.707317	0.731707	0.634146	0.707317	0.658537	0.00908441	0.00811123	0.00904	0.00751237	0.00881511	0.00751761	0.00951495	0.00731263	0.00628696	0.00816234	0.00721939	0.00719816	0.00639307	0.00719923
65	Hemoglobin subunit beta OS=Homo sapiens GN=HBB PE=1 SV=2	HBB_HUMAN	16	7.32	Homo sapiens	7	7	8	49	42	51	7	7	5	11	12	9	8	13	12	0.4375	0.4375	0.5	3.0625	2.625	3.1875	0.4375	0.4375	0.3125	0.6875	0.75	0.5625	0.5	0.8125	0.75	0.00479269	0.0058198	0.00661857	0.0362797	0.0379491	0.0377869	0.00461282	0.0042313	0.00309814	0.0076692	0.00765505	0.00553359	0.00504069	0.0082698
66	Integrin alpha-IIb OS=Homo sapiens GN=ITGA2B PE=1 SV=3	ITA2B_HUMAN	113	5.03	Homo sapiens	19	19	17	4	9	8	17	20	18	3	2	0	0	2	2	0.168142	0.168142	0.150442	0.0353982	0.079646	0.0707965	0.150442	0.176991	0.159292	0.0265487	0.0176991	0	0	0.0176991	0.0176991	0.00184194	0.00223669	0.00199143	0.000419343	0.00115143	0.000839271	0.0015862	0.00171178	0.00157923	0.000296156	0.00018065	0	0	0.000180145
67	Serum amyloid A-4 protein OS=Homo sapiens GN=SAA4 PE=1 SV=2	SAA4_HUMAN	15	9.38	Homo sapiens	4	4	4	5	2	2	4	6	4	10	13	15	14	13	15	0.266667	0.266667	0.266667	0.333333	0.133333	0.133333	0.266667	0.4	0.266667	0.666667	0.866667	1	0.933333	0.866667	1	0.00292126	0.00354731	0.0035299	0.00394881	0.00192757	0.00158063	0.00281162	0.00386862	0.00264375	0.0074368	0.00884583	0.00983749	0.00940929	0.00882112
68	Heparin cofactor 2 OS=Homo sapiens GN=SERPIND1 PE=1 SV=3	HEP2_HUMAN	57	6.89	Homo sapiens	11	9	9	16	12	14	8	14	12	11	8	9	7	13	11	0.192982	0.157895	0.157895	0.280702	0.210526	0.245614	0.140351	0.245614	0.210526	0.192982	0.140351	0.157895	0.122807	0.22807	0.192982	0.00211407	0.00210038	0.00209007	0.00332531	0.00304353	0.00291168	0.0014798	0.00237547	0.00208717	0.00215276	0.00143252	0.00155329	0.00123806	0.00232135
69	Integrin beta-3 OS=Homo sapiens GN=ITGB3 PE=1 SV=2	ITB3_HUMAN	87	4.85	Homo sapiens	16	17	12	4	5	6	17	20	19	2	0	0	3	0	2	0.183908	0.195402	0.137931	0.045977	0.0574713	0.0689655	0.195402	0.229885	0.218391	0.0229885	0	0	0.0344828	0	0.0229885	0.00201466	0.00259932	0.00182581	0.000544663	0.00083085	0.000817566	0.00206024	0.00222334	0.00216514	0.000256441	0	0	0.000347634	0
70	C4b-binding protein beta chain OS=Homo sapiens GN=C4BPB PE=1 SV=1	C4BPB_HUMAN	28	4.8	Homo sapiens	23	21	22	23	15	26	19	18	19	7	10	10	8	11	11	0.821429	0.75	0.785714	0.821429	0.535714	0.928571	0.678571	0.642857	0.678571	0.25	0.357143	0.357143	0.285714	0.392857	0.392857	0.00899852	0.00997681	0.0104006	0.009731	0.0077447	0.0110079	0.00715458	0.00621742	0.00672739	0.0027888	0.00364526	0.00351339	0.0028804	0.00399859
71	Vitamin K-dependent protein C OS=Homo sapiens GN=PROC PE=1 SV=1	PROC_HUMAN	52	6.23	Homo sapiens	21	13	15	16	16	22	17	20	17	17	19	18	19	18	21	0.403846	0.25	0.288462	0.307692	0.307692	0.423077	0.326923	0.384615	0.326923	0.326923	0.365385	0.346154	0.365385	0.346154	0.403846	0.00442402	0.0033256	0.00381841	0.00364506	0.00444824	0.00501545	0.00344694	0.00371983	0.00324113	0.00364689	0.00372938	0.00340528	0.00368358	0.00352323
72	Hemoglobin subunit alpha OS=Homo sapiens GN=HBA1 PE=1 SV=2	HBA_HUMAN	15	9.09	Homo sapiens	5	8	7	48	31	44	7	8	6	6	8	10	9	8	7	0.333333	0.533333	0.466667	3.2	2.06667	2.93333	0.466667	0.533333	0.4	0.4	0.533333	0.666667	0.6	0.533333	0.466667	0.00365157	0.00709462	0.00617733	0.0379086	0.0298774	0.0347738	0.00492034	0.00515816	0.00396562	0.00446208	0.00544359	0.00655833	0.00604883	0.00542838
73	Tropomyosin alpha-4 chain OS=Homo sapiens GN=TPM4 PE=1 SV=3	TPM4_HUMAN	29	4.36	Homo sapiens	23	14	18	16	11	16	23	22	21	0	0	0	0	0	0	0.793103	0.482759	0.62069	0.551724	0.37931	0.551724	0.793103	0.758621	0.724138	0	0	0	0	0	0	0.00868823	0.00642185	0.00821615	0.00653596	0.00548361	0.00654052	0.00836216	0.00733703	0.00717914	0	0	0	0	0
74	Antithrombin-III OS=Homo sapiens GN=SERPINC1 PE=1 SV=1	ANT3_HUMAN	53	6.68	Homo sapiens	0	0	2	0	2	0	3	4	3	10	10	9	9	7	7	0	0	0.0377358	0	0.0377358	0	0.0566038	0.0754717	0.0566038	0.188679	0.188679	0.169811	0.169811	0.132075	0.132075	0	0	0.000499515	0	0.000545539	0	0.000596807	0.000729928	0.000561173	0.00210475	0.0019258	0.00167052	0.00171193	0.00134429
75	Immunoglobulin lambda-like polypeptide 5 OS=Homo sapiens GN=IGLL5 PE=2 SV=2	IGLL5_HUMAN	23	9.05	Homo sapiens	9	4	7	6	4	6	5	7	9	10	9	10	8	11	11	0.391304	0.173913	0.304348	0.26087	0.173913	0.26087	0.217391	0.304348	0.391304	0.434783	0.391304	0.434783	0.347826	0.478261	0.478261	0.00428663	0.00231346	0.00402869	0.00309037	0.00251422	0.00309253	0.00229208	0.00294351	0.00387941	0.00485009	0.00399394	0.00427717	0.00350657	0.00486784
76	Complement component C6 OS=Homo sapiens GN=C6 PE=1 SV=3	CO6_HUMAN	105	6.74	Homo sapiens	4	5	4	6	4	5	4	4	4	2	2	0	0	3	2	0.0380952	0.047619	0.0380952	0.0571429	0.0380952	0.047619	0.0380952	0.0380952	0.0380952	0.0190476	0.0190476	0	0	0.0285714	0.0190476	0.000417323	0.000633448	0.000504272	0.000676939	0.000550735	0.00056451	0.000401661	0.00036844	0.000377678	0.00021248	0.000194414	0	0	0.000290806
77	Vitamin K-dependent protein Z OS=Homo sapiens GN=PROZ PE=1 SV=2	PROZ_HUMAN	45	5.87	Homo sapiens	13	6	10	18	11	13	13	10	11	11	12	14	14	17	15	0.288889	0.133333	0.222222	0.4	0.244444	0.288889	0.288889	0.222222	0.244444	0.244444	0.266667	0.311111	0.311111	0.377778	0.333333	0.0031647	0.00177365	0.00294159	0.00473857	0.00353388	0.00342469	0.00304593	0.00214923	0.00242343	0.00272683	0.00272179	0.00306055	0.00313643	0.0038451
78	Histidine-rich glycoprotein OS=Homo sapiens GN=HRG PE=1 SV=1	HRG_HUMAN	60	7.52	Homo sapiens	8	4	6	10	6	8	6	3	7	15	18	18	17	15	15	0.133333	0.0666667	0.1	0.166667	0.1	0.133333	0.1	0.05	0.116667	0.25	0.3	0.3	0.283333	0.25	0.25	0.00146063	0.000886827	0.00132371	0.00197441	0.00144568	0.00158063	0.00105436	0.000483577	0.00115664	0.0027888	0.00306202	0.00295125	0.00285639	0.00254455
79	Serum amyloid A-2 protein OS=Homo sapiens GN=SAA2 PE=1 SV=1	SAA2_HUMAN	14	9.48	Homo sapiens	7	0	4	6	0	0	6	7	6	12	13	14	15	13	12	0.5	0	0.285714	0.428571	0	0	0.428571	0.5	0.428571	0.857143	0.928571	1	1.07143	0.928571	0.857143	0.00547736	0	0.00378204	0.00507704	0	0	0.00451868	0.00483577	0.00424888	0.0095616	0.00947768	0.00983749	0.0108015	0.0094512
80	Hornerin OS=Homo sapiens GN=HRNR PE=1 SV=2	HORN_HUMAN	282	10.24	Homo sapiens	6	2	3	3	3	7	4	4	6	9	10	13	11	12	10	0.0212766	0.0070922	0.0106383	0.0106383	0.0106383	0.0248227	0.0141844	0.0141844	0.0212766	0.0319149	0.035461	0.0460993	0.0390071	0.0425532	0.035461	0.000233079	9.43433e-05	0.000140821	0.000126026	0.000153796	0.000294266	0.000149554	0.000137185	0.000210937	0.000356017	0.000361941	0.000453501	0.000393245	0.000433116
81	Plasma protease C1 inhibitor OS=Homo sapiens GN=SERPING1 PE=1 SV=2	IC1_HUMAN	55	6.52	Homo sapiens	0	0	2	0	3	3	0	0	0	4	3	4	5	4	4	0	0	0.0363636	0	0.0545455	0.0545455	0	0	0	0.0727273	0.0545455	0.0727273	0.0909091	0.0727273	0.0727273	0	0	0.00048135	0	0.000788552	0.00064662	0	0	0	0.000811287	0.000556731	0.000715454	0.000916489	0.000740234
82	Apolipoprotein C-I OS=Homo sapiens GN=APOC1 PE=1 SV=1	APOC1_HUMAN	9	9.17	Homo sapiens	5	0	0	7	4	5	4	7	5	10	11	10	12	11	10	0.555556	0	0	0.777778	0.444444	0.555556	0.444444	0.777778	0.555556	1.11111	1.22222	1.11111	1.33333	1.22222	1.11111	0.00608596	0	0	0.00921389	0.00642524	0.00658594	0.00468604	0.00752231	0.0055078	0.0123947	0.0124749	0.0109305	0.0134418	0.01244
83	Alpha-actinin-1 OS=Homo sapiens GN=ACTN1 PE=1 SV=2	ACTN1_HUMAN	103	5.07	Homo sapiens	14	6	7	2	0	0	10	16	13	0	0	0	0	0	0	0.135922	0.0582524	0.0679612	0.0194175	0	0	0.0970874	0.15534	0.126214	0	0	0	0	0	0	0.00148899	0.000774898	0.000899611	0.000230028	0	0	0.00102365	0.00150238	0.00125129	0	0	0	0	0
84	Ig lambda-2 chain C regions OS=Homo sapiens GN=IGLC2 PE=1 SV=1	LAC2_HUMAN	11	7.34	Homo sapiens	18	10	0	11	0	0	15	15	15	12	13	15	12	16	14	1.63636	0.909091	0	1	0	0	1.36364	1.36364	1.36364	1.09091	1.18182	1.36364	1.09091	1.45455	1.27273	0.0179259	0.0120931	0	0.0118464	0	0	0.0143776	0.0131885	0.0135192	0.0121693	0.0120625	0.0134148	0.0109979	0.0148047
85	Cartilage oligomeric matrix protein OS=Homo sapiens GN=COMP PE=1 SV=2	COMP_HUMAN	83	4.16	Homo sapiens	28	21	19	32	23	29	21	22	19	15	18	18	17	18	22	0.337349	0.253012	0.228916	0.385542	0.277108	0.349398	0.253012	0.26506	0.228916	0.180723	0.216867	0.216867	0.204819	0.216867	0.26506	0.00369557	0.00336567	0.00303019	0.0045673	0.0040061	0.004142	0.00266766	0.00256354	0.00226948	0.002016	0.00221351	0.00213343	0.00206486	0.00220732
86	Alpha-1-antichymotrypsin OS=Homo sapiens GN=SERPINA3 PE=1 SV=2	AACT_HUMAN	48	5.19	Homo sapiens	0	0	0	0	0	2	0	0	0	11	12	8	9	8	7	0	0	0	0	0	0.0416667	0	0	0	0.229167	0.25	0.166667	0.1875	0.166667	0.145833	0	0	0	0	0	0.000493946	0	0	0	0.0025564	0.00255168	0.00163958	0.00189026	0.00169637
87	Beta-2-glycoprotein 1 OS=Homo sapiens GN=APOH PE=1 SV=3	APOH_HUMAN	38	8.03	Homo sapiens	10	13	13	2	0	6	13	13	17	15	15	15	16	16	15	0.263158	0.342105	0.342105	0.0526316	0	0.157895	0.342105	0.342105	0.447368	0.394737	0.394737	0.394737	0.421053	0.421053	0.394737	0.00288282	0.00455082	0.00452849	0.000623496	0	0.00187179	0.00360702	0.00330869	0.00443523	0.00440337	0.00402897	0.00388322	0.00424479	0.00428557
88	C-reactive protein OS=Homo sapiens GN=CRP PE=1 SV=1	CRP_HUMAN	25	5.32	Homo sapiens	4	4	0	2	2	4	4	3	3	6	9	7	6	5	7	0.16	0.16	0	0.08	0.08	0.16	0.16	0.12	0.12	0.24	0.36	0.28	0.24	0.2	0.28	0.00175276	0.00212839	0	0.000947714	0.00115654	0.00189675	0.00168697	0.00116059	0.00118969	0.00267725	0.00367442	0.0027545	0.00241953	0.00203564
89	Complement C4-B OS=Homo sapiens GN=C4B PE=1 SV=2	CO4B_HUMAN	193	7.28	Homo sapiens	461	322	332	420	351	430	418	465	474	91	92	86	86	80	78	2.3886	1.66839	1.72021	2.17617	1.81865	2.22798	2.1658	2.40933	2.45596	0.471503	0.476684	0.445596	0.445596	0.414508	0.404145	0.0261665	0.0221937	0.0227706	0.0257798	0.0262919	0.026412	0.0228353	0.0233019	0.0243485	0.00525971	0.00486538	0.00438354	0.00449222	0.00421895
90	Coagulation factor X OS=Homo sapiens GN=F10 PE=1 SV=2	FA10_HUMAN	55	5.74	Homo sapiens	14	9	13	14	14	18	12	13	15	7	7	6	9	4	4	0.254545	0.163636	0.236364	0.254545	0.254545	0.327273	0.218182	0.236364	0.272727	0.127273	0.127273	0.109091	0.163636	0.0727273	0.0727273	0.00278848	0.00217676	0.00312878	0.00301545	0.00367991	0.00387972	0.00230042	0.002286	0.00270383	0.00141975	0.00129904	0.00107318	0.00164968	0.000740234
91	Complement factor B OS=Homo sapiens GN=CFB PE=1 SV=2	CFAB_HUMAN	86	7.07	Homo sapiens	3	2	3	2	0	0	3	5	5	13	13	18	12	12	14	0.0348837	0.0232558	0.0348837	0.0232558	0	0	0.0348837	0.0581395	0.0581395	0.151163	0.151163	0.209302	0.139535	0.139535	0.162791	0.000382142	0.000309358	0.000461761	0.000275498	0	0	0.0003678	0.000562299	0.000576398	0.00168625	0.00154288	0.00205901	0.0014067	0.00142022
92	CD5 antigen-like OS=Homo sapiens GN=CD5L PE=1 SV=1	CD5L_HUMAN	38	5.15	Homo sapiens	9	7	5	7	7	6	7	11	8	6	6	5	7	6	5	0.236842	0.184211	0.131579	0.184211	0.184211	0.157895	0.184211	0.289474	0.210526	0.157895	0.157895	0.131579	0.184211	0.157895	0.131579	0.00259454	0.00245044	0.00174173	0.00218224	0.00266309	0.00187179	0.00194224	0.00279966	0.00208717	0.00176135	0.00161159	0.00129441	0.0018571	0.00160709
93	Apolipoprotein L1 OS=Homo sapiens GN=APOL1 PE=1 SV=5	APOL1_HUMAN	44	5.55	Homo sapiens	5	3	2	0	3	3	2	4	3	6	6	9	6	9	7	0.113636	0.0681818	0.0454545	0	0.0681818	0.0681818	0.0454545	0.0909091	0.0681818	0.136364	0.136364	0.204545	0.136364	0.204545	0.159091	0.00124486	0.000906983	0.000601688	0	0.00098569	0.000808275	0.000479254	0.000879231	0.000675958	0.00152116	0.00139183	0.00201221	0.00137473	0.00208191
94	Keratin, type I cytoskeletal 16 OS=Homo sapiens GN=KRT16 PE=1 SV=4	K1C16_HUMAN	51	4.69	Homo sapiens	6	5	5	12	11	10	26	30	28	11	10	10	11	44	43	0.117647	0.0980392	0.0980392	0.235294	0.215686	0.196078	0.509804	0.588235	0.54902	0.215686	0.196078	0.196078	0.215686	0.862745	0.843137	0.00128879	0.00130416	0.00129776	0.0027874	0.00311813	0.00232445	0.00537516	0.00568914	0.00544301	0.00240602	0.00200132	0.00192892	0.00217442	0.00878121
95	Ig gamma-2 chain C region OS=Homo sapiens GN=IGHG2 PE=1 SV=2	IGHG2_HUMAN	36	7.66	Homo sapiens	21	20	18	14	18	17	27	25	27	22	20	22	19	24	18	0.583333	0.555556	0.5	0.388889	0.5	0.472222	0.75	0.694444	0.75	0.611111	0.555556	0.611111	0.527778	0.666667	0.5	0.00639026	0.00739023	0.00661857	0.00460695	0.00722839	0.00559805	0.00790769	0.00671635	0.00743554	0.00681707	0.00567041	0.0060118	0.00532073	0.00678548
96	Mannan-binding lectin serine protease 1 OS=Homo sapiens GN=MASP1 PE=1 SV=3	MASP1_HUMAN	79	5.18	Homo sapiens	15	13	10	12	9	9	8	10	10	15	14	12	13	9	9	0.189873	0.164557	0.126582	0.151899	0.113924	0.113924	0.101266	0.126582	0.126582	0.189873	0.177215	0.151899	0.164557	0.113924	0.113924	0.00208001	0.002189	0.00167559	0.00179946	0.00164698	0.00135054	0.00106771	0.00122425	0.00125494	0.00211808	0.00180879	0.0014943	0.00165896	0.00115954
97	Lipopolysaccharide-binding protein OS=Homo sapiens GN=LBP PE=1 SV=3	LBP_HUMAN	53	6.68	Homo sapiens	6	10	10	9	9	11	8	7	11	10	11	12	9	18	19	0.113208	0.188679	0.188679	0.169811	0.169811	0.207547	0.150943	0.132075	0.207547	0.188679	0.207547	0.226415	0.169811	0.339623	0.358491	0.00124016	0.00250989	0.00249757	0.00201166	0.00245493	0.00246041	0.00159149	0.00127737	0.00205763	0.00210475	0.00211838	0.00222736	0.00171193	0.00345675
98	Alpha-1-acid glycoprotein 1 OS=Homo sapiens GN=ORM1 PE=1 SV=1	A1AG1_HUMAN	24	4.66	Homo sapiens	5	3	3	2	2	3	4	4	5	9	13	10	11	9	10	0.208333	0.125	0.125	0.0833333	0.0833333	0.125	0.166667	0.166667	0.208333	0.375	0.541667	0.416667	0.458333	0.375	0.416667	0.00228223	0.0016628	0.00165464	0.000987203	0.00120473	0.00148184	0.00175727	0.00161192	0.00206543	0.0041832	0.00552865	0.00409895	0.00462063	0.00381683
99	Glyceraldehyde-3-phosphate dehydrogenase OS=Homo sapiens GN=GAPDH PE=1 SV=3	G3P_HUMAN	36	8.73	Homo sapiens	11	7	7	2	2	3	17	16	11	4	4	2	2	5	5	0.305556	0.194444	0.194444	0.0555556	0.0555556	0.0833333	0.472222	0.444444	0.305556	0.111111	0.111111	0.0555556	0.0555556	0.138889	0.138889	0.00334728	0.00258658	0.00257389	0.000658135	0.000803155	0.000987892	0.00497892	0.00429846	0.00302929	0.00123947	0.00113408	0.000546527	0.000560077	0.00141364
100	Vinculin OS=Homo sapiens GN=VCL PE=1 SV=4	VINC_HUMAN	124	5.33	Homo sapiens	14	12	12	3	0	2	12	12	11	0	0	0	0	0	0	0.112903	0.0967742	0.0967742	0.0241935	0	0.016129	0.0967742	0.0967742	0.0887097	0	0	0	0	0	0	0.00123682	0.00128733	0.00128101	0.000286607	0	0.000191205	0.00102035	0.000935956	0.000879472	0	0	0	0	0
101	Keratin, type II cytoskeletal 6A OS=Homo sapiens GN=KRT6A PE=1 SV=3	K2C6A_HUMAN	60	8.16	Homo sapiens	0	0	7	14	7	12	37	49	43	9	8	9	7	34	41	0	0	0.116667	0.233333	0.116667	0.2	0.616667	0.816667	0.716667	0.15	0.133333	0.15	0.116667	0.566667	0.683333	0	0	0.00154433	0.00276417	0.00168662	0.00237094	0.00650188	0.00789843	0.00710507	0.00167328	0.0013609	0.00147562	0.00117616	0.00576766
102	Erythrocyte band 7 integral membrane protein OS=Homo sapiens GN=STOM PE=1 SV=3	STOM_HUMAN	32	8.07	Homo sapiens	8	9	9	0	2	0	6	8	8	0	2	0	0	0	0	0.25	0.28125	0.28125	0	0.0625	0	0.1875	0.25	0.25	0	0.0625	0	0	0	0	0.00273868	0.0037413	0.00372295	0	0.000903549	0	0.00197692	0.00241789	0.00247851	0	0.000637921	0	0	0
103	Alpha-2-HS-glycoprotein OS=Homo sapiens GN=AHSG PE=1 SV=1	FETUA_HUMAN	39	5.52	Homo sapiens	6	6	4	7	6	6	7	8	9	9	9	9	9	11	11	0.153846	0.153846	0.102564	0.179487	0.153846	0.153846	0.179487	0.205128	0.230769	0.230769	0.230769	0.230769	0.230769	0.282051	0.282051	0.00168534	0.00204652	0.00135766	0.00212628	0.00222412	0.0018238	0.00189244	0.00198391	0.00228786	0.00257428	0.0023554	0.00227019	0.00232647	0.00287078
104	Hemopexin OS=Homo sapiens GN=HPX PE=1 SV=2	HEMO_HUMAN	52	7.02	Homo sapiens	3	2	3	2	0	2	5	5	5	12	11	11	10	8	11	0.0576923	0.0384615	0.0576923	0.0384615	0	0.0384615	0.0961538	0.0961538	0.0961538	0.230769	0.211538	0.211538	0.192308	0.153846	0.211538	0.000632003	0.000511631	0.000763681	0.000455632	0	0.00045595	0.00101381	0.000929956	0.000953274	0.00257428	0.00215912	0.00208101	0.00193873	0.00156588
105	Lumican OS=Homo sapiens GN=LUM PE=1 SV=2	LUM_HUMAN	38	6.6	Homo sapiens	6	4	4	7	5	9	4	4	4	5	4	4	4	3	3	0.157895	0.105263	0.105263	0.184211	0.131579	0.236842	0.105263	0.105263	0.105263	0.131579	0.105263	0.105263	0.105263	0.0789474	0.0789474	0.00172969	0.00140025	0.00139338	0.00218224	0.00190221	0.00280769	0.00110985	0.00101806	0.00104358	0.00146779	0.00107439	0.00103553	0.0010612	0.000803544
106	Protein Z-dependent protease inhibitor OS=Homo sapiens GN=SERPINA10 PE=1 SV=1	ZPI_HUMAN	51	8.58	Homo sapiens	11	11	11	13	7	12	14	11	15	4	4	4	5	3	2	0.215686	0.215686	0.215686	0.254902	0.137255	0.235294	0.27451	0.215686	0.294118	0.0784314	0.0784314	0.0784314	0.0980392	0.0588235	0.0392157	0.00236278	0.00286915	0.00285507	0.00301968	0.00198426	0.00278934	0.00289432	0.00208602	0.0029159	0.000874918	0.000800528	0.000771568	0.000988371	0.000598719
107	Alpha-1B-glycoprotein OS=Homo sapiens GN=A1BG PE=1 SV=4	A1BG_HUMAN	54	5.71	Homo sapiens	4	0	2	4	2	0	6	2	3	10	10	10	10	9	8	0.0740741	0	0.037037	0.0740741	0.037037	0	0.111111	0.037037	0.0555556	0.185185	0.185185	0.185185	0.185185	0.166667	0.148148	0.000811461	0	0.000490264	0.000877513	0.000535436	0	0.00117151	0.000358205	0.00055078	0.00206578	0.00189014	0.00182176	0.00186692	0.00169637
108	Phosphatidylcholine-sterol acyltransferase OS=Homo sapiens GN=LCAT PE=1 SV=1	LCAT_HUMAN	50	6.04	Homo sapiens	3	5	4	6	3	6	5	4	5	17	18	17	15	13	17	0.06	0.1	0.08	0.12	0.06	0.12	0.1	0.08	0.1	0.34	0.36	0.34	0.3	0.26	0.34	0.000657283	0.00133024	0.00105897	0.00142157	0.000867407	0.00142256	0.00105436	0.000773724	0.000991405	0.00379277	0.00367442	0.00334475	0.00302442	0.00264634
109	Complement component C7 OS=Homo sapiens GN=C7 PE=1 SV=2	CO7_HUMAN	94	6.44	Homo sapiens	2	0	0	0	3	2	2	0	2	0	3	2	0	2	2	0.0212766	0	0	0	0.0319149	0.0212766	0.0212766	0	0.0212766	0	0.0319149	0.0212766	0	0.0212766	0.0212766	0.000233079	0	0	0	0.000461387	0.000252228	0.000224332	0	0.000210937	0	0.000325747	0.000209308	0	0.000216558
110	Apolipoprotein F OS=Homo sapiens GN=APOF PE=1 SV=2	APOF_HUMAN	35	5.36	Homo sapiens	10	6	6	10	4	8	6	6	6	9	8	8	6	5	5	0.285714	0.171429	0.171429	0.285714	0.114286	0.228571	0.171429	0.171429	0.171429	0.257143	0.228571	0.228571	0.171429	0.142857	0.142857	0.00312992	0.00228041	0.00226922	0.00338469	0.0016522	0.00270965	0.00180747	0.00165798	0.00169955	0.00286848	0.00233297	0.00224857	0.00172824	0.00145403
111	Haptoglobin-related protein OS=Homo sapiens GN=HPR PE=2 SV=2	HPTR_HUMAN	39	7.11	Homo sapiens	16	12	8	14	8	10	15	18	16	29	26	27	27	30	29	0.410256	0.307692	0.205128	0.358974	0.205128	0.25641	0.384615	0.461538	0.410256	0.74359	0.666667	0.692308	0.692308	0.769231	0.74359	0.00449425	0.00409305	0.00271531	0.00425256	0.00296549	0.00303967	0.00405523	0.00446379	0.0040673	0.00829489	0.00680449	0.00681057	0.00697942	0.0078294
112	Multimerin-1 OS=Homo sapiens GN=MMRN1 PE=1 SV=3	MMRN1_HUMAN	138	8.01	Homo sapiens	9	10	9	3	0	3	10	9	9	0	0	0	0	0	0	0.0652174	0.0724638	0.0652174	0.0217391	0	0.0217391	0.0724638	0.0652174	0.0652174	0	0	0	0	0	0	0.000714439	0.000963943	0.000863292	0.000257531	0	0.000257711	0.000764028	0.000630753	0.000646568	0	0	0	0	0
113	Beta-Ala-His dipeptidase OS=Homo sapiens GN=CNDP1 PE=1 SV=4	CNDP1_HUMAN	57	4.95	Homo sapiens	0	0	0	0	0	0	0	0	0	12	12	12	10	10	8	0	0	0	0	0	0	0	0	0	0.210526	0.210526	0.210526	0.175439	0.175439	0.140351	0	0	0	0	0	0	0	0	0	0.00234846	0.00214879	0.00207105	0.00176866	0.00178565
114	Amyloid beta A4 protein OS=Homo sapiens GN=APP PE=1 SV=3	A4_HUMAN	87	4.45	Homo sapiens	0	0	0	0	0	0	0	0	0	0	0	0	0	0	0	0	0	0	0	0	0	0	0	0	0	0	0	0	0	0	0	0	0	0	0	0	0	0	0	0	0	0	0	0
115	Endoplasmin OS=Homo sapiens GN=HSP90B1 PE=1 SV=1	ENPL_HUMAN	92	4.48	Homo sapiens	9	6	4	9	3	6	9	8	8	0	2	2	0	3	2	0.0978261	0.0652174	0.0434783	0.0978261	0.0326087	0.0652174	0.0978261	0.0869565	0.0869565	0	0.0217391	0.0217391	0	0.0326087	0.0217391	0.00107166	0.000867549	0.000575528	0.00115889	0.000471417	0.000773133	0.00103144	0.000841004	0.000862091	0	0.000221885	0.000213858	0	0.000331898
116	Tubulin beta-4B chain OS=Homo sapiens GN=TUBB4B PE=1 SV=1	TBB4B_HUMAN	50	4.52	Homo sapiens	15	14	11	10	7	11	16	13	17	0	0	0	0	0	0	0.3	0.28	0.22	0.2	0.14	0.22	0.32	0.26	0.34	0	0	0	0	0	0	0.00328642	0.00372467	0.00291217	0.00236929	0.00202395	0.00260803	0.00337395	0.0025146	0.00337078	0	0	0	0	0
117	Complement component C8 alpha chain OS=Homo sapiens GN=C8A PE=1 SV=2	CO8A_HUMAN	65	6.41	Homo sapiens	2	3	2	4	2	5	2	3	5	3	2	3	3	0	2	0.0307692	0.0461538	0.0307692	0.0615385	0.0307692	0.0769231	0.0307692	0.0461538	0.0769231	0.0461538	0.0307692	0.0461538	0.0461538	0	0.0307692	0.000337068	0.000613957	0.000407297	0.000729011	0.000444824	0.0009119	0.000324418	0.000446379	0.000762619	0.000514855	0.000314053	0.000454038	0.000465295	0
118	Alpha-2-antiplasmin OS=Homo sapiens GN=SERPINF2 PE=1 SV=3	A2AP_HUMAN	55	6.24	Homo sapiens	0	0	0	0	0	2	2	0	0	10	10	11	10	8	12	0	0	0	0	0	0.0363636	0.0363636	0	0	0.181818	0.181818	0.2	0.181818	0.145455	0.218182	0	0	0	0	0	0.00043108	0.000383403	0	0	0.00202822	0.00185577	0.0019675	0.00183298	0.00148047
119	Tubulin alpha-4A chain OS=Homo sapiens GN=TUBA4A PE=1 SV=1	TBA4A_HUMAN	50	4.69	Homo sapiens	12	5	5	6	5	4	11	11	8	0	0	0	0	0	0	0.24	0.1	0.1	0.12	0.1	0.08	0.22	0.22	0.16	0	0	0	0	0	0	0.00262913	0.00133024	0.00132371	0.00142157	0.00144568	0.000948376	0.00231959	0.00212774	0.00158625	0	0	0	0	0
120	Keratin, type II cytoskeletal 5 OS=Homo sapiens GN=KRT5 PE=1 SV=3	K2C5_HUMAN	62	7.91	Homo sapiens	7	5	6	12	10	10	25	23	26	10	11	10	9	22	22	0.112903	0.0806452	0.0967742	0.193548	0.16129	0.16129	0.403226	0.370968	0.419355	0.16129	0.177419	0.16129	0.145161	0.354839	0.354839	0.00123682	0.00107278	0.00128101	0.00229286	0.00233174	0.00191205	0.00425145	0.00358783	0.0041575	0.00179923	0.00181087	0.00158669	0.00146343	0.00361163
121	Complement component C8 beta chain OS=Homo sapiens GN=C8B PE=1 SV=3	CO8B_HUMAN	67	8.17	Homo sapiens	2	0	0	2	3	4	3	3	4	0	2	0	0	0	0	0.0298507	0	0	0.0298507	0.0447761	0.0597015	0.0447761	0.0447761	0.0597015	0	0.0298507	0	0	0	0	0.000327007	0	0	0.000353625	0.000647319	0.000707743	0.000472101	0.000433054	0.000591884	0	0.000304679	0	0	0
122	14-3-3 protein zeta/delta OS=Homo sapiens GN=YWHAZ PE=1 SV=1	1433Z_HUMAN	28	4.43	Homo sapiens	7	5	9	4	5	8	6	13	11	0	0	0	0	0	0	0.25	0.178571	0.321429	0.142857	0.178571	0.285714	0.214286	0.464286	0.392857	0	0	0	0	0	0	0.00273868	0.00237543	0.00425479	0.00169235	0.00258157	0.00338706	0.00225934	0.00449036	0.0038948	0	0	0	0	0
123	Tubulin beta-1 chain OS=Homo sapiens GN=TUBB1 PE=1 SV=1	TBB1_HUMAN	50	4.82	Homo sapiens	11	8	7	3	4	5	11	8	9	0	0	0	0	0	0	0.22	0.16	0.14	0.06	0.08	0.1	0.22	0.16	0.18	0	0	0	0	0	0	0.00241004	0.00212839	0.0018532	0.000710786	0.00115654	0.00118547	0.00231959	0.00154745	0.00178453	0	0	0	0	0
124	Complement C1q subcomponent subunit C OS=Homo sapiens GN=C1QC PE=1 SV=3	C1QC_HUMAN	26	8.58	Homo sapiens	3	2	2	3	0	0	2	3	3	3	2	3	3	2	2	0.115385	0.0769231	0.0769231	0.115385	0	0	0.0769231	0.115385	0.115385	0.115385	0.0769231	0.115385	0.115385	0.0769231	0.0769231	0.00126401	0.00102326	0.00101824	0.0013669	0	0	0.000811045	0.00111595	0.00114393	0.00128714	0.000785133	0.00113509	0.00116324	0.00078294
125	Complement C1q subcomponent subunit B OS=Homo sapiens GN=C1QB PE=1 SV=3	C1QB_HUMAN	27	8.87	Homo sapiens	0	3	3	3	3	3	2	2	2	0	0	0	0	0	0	0	0.111111	0.111111	0.111111	0.111111	0.111111	0.0740741	0.0740741	0.0740741	0	0	0	0	0	0	0	0.00147805	0.00147079	0.00131627	0.00160631	0.00131719	0.000781007	0.000716411	0.000734374	0	0	0	0	0
126	Spectrin alpha chain, erythrocytic 1 OS=Homo sapiens GN=SPTA1 PE=1 SV=5	SPTA1_HUMAN	280	4.69	Homo sapiens	0	0	0	0	0	0	0	0	0	0	0	0	0	0	0	0	0	0	0	0	0	0	0	0	0	0	0	0	0	0	0	0	0	0	0	0	0	0	0	0	0	0	0	0
127	Complement factor I OS=Homo sapiens GN=CFI PE=1 SV=2	CFAI_HUMAN	66	7.53	Homo sapiens	19	13	14	19	15	22	15	20	13	2	2	0	0	0	0	0.287879	0.19697	0.212121	0.287879	0.227273	0.333333	0.227273	0.30303	0.19697	0.030303	0.030303	0	0	0	0	0.00315363	0.00262017	0.00280788	0.00341034	0.00328563	0.00395157	0.00239627	0.00293077	0.00195277	0.000338036	0.000309295	0	0	0
128	Angiotensinogen OS=Homo sapiens GN=AGT PE=1 SV=1	ANGT_HUMAN	53	6.27	Homo sapiens	0	0	0	3	3	3	2	2	0	5	8	4	4	7	5	0	0	0	0.0566038	0.0566038	0.0566038	0.0377358	0.0377358	0	0.0943396	0.150943	0.0754717	0.0754717	0.132075	0.0943396	0	0	0	0.000670553	0.000818308	0.000671021	0.000397871	0.000364964	0	0.00105238	0.00154064	0.000742452	0.000760859	0.00134429
129	Properdin OS=Homo sapiens GN=CFP PE=1 SV=2	PROP_HUMAN	51	7.92	Homo sapiens	0	2	0	2	0	0	2	3	4	12	12	13	10	12	13	0	0.0392157	0	0.0392157	0	0	0.0392157	0.0588235	0.0784314	0.235294	0.235294	0.254902	0.196078	0.235294	0.254902	0	0.000521663	0	0.000464566	0	0	0.000413474	0.000568914	0.000777572	0.00262475	0.00240158	0.0025076	0.00197674	0.00239488
130	Secreted phosphoprotein 24 OS=Homo sapiens GN=SPP2 PE=1 SV=1	SPP24_HUMAN	24	8.46	Homo sapiens	3	4	3	2	4	4	3	3	3	7	7	6	6	7	7	0.125	0.166667	0.125	0.0833333	0.166667	0.166667	0.125	0.125	0.125	0.291667	0.291667	0.25	0.25	0.291667	0.291667	0.00136934	0.00221707	0.00165464	0.000987203	0.00240946	0.00197578	0.00131795	0.00120894	0.00123926	0.0032536	0.00297696	0.00245937	0.00252035	0.00296865
131	Extracellular superoxide dismutase [Cu-Zn] OS=Homo sapiens GN=SOD3 PE=1 SV=2	SODE_HUMAN	26	6.59	Homo sapiens	6	5	4	5	3	5	6	4	5	5	9	9	7	5	6	0.230769	0.192308	0.153846	0.192308	0.115385	0.192308	0.230769	0.153846	0.192308	0.192308	0.346154	0.346154	0.269231	0.192308	0.230769	0.00252801	0.00255816	0.00203648	0.00227816	0.00166809	0.00227975	0.00243314	0.00148793	0.00190655	0.00214523	0.0035331	0.00340528	0.00271422	0.00195735
132	Thrombospondin-4 OS=Homo sapiens GN=THBS4 PE=1 SV=2	TSP4_HUMAN	106	4.23	Homo sapiens	12	7	10	10	8	10	9	10	12	12	10	11	10	11	10	0.113208	0.0660377	0.0943396	0.0943396	0.0754717	0.0943396	0.0849057	0.0943396	0.113208	0.113208	0.0943396	0.103774	0.0943396	0.103774	0.0943396	0.00124016	0.000878461	0.00124879	0.00111759	0.00109108	0.00111837	0.000895211	0.00091241	0.00112235	0.00126285	0.000962899	0.00102087	0.000951074	0.00105623
133	Band 3 anion transport protein OS=Homo sapiens GN=SLC4A1 PE=1 SV=3	B3AT_HUMAN	102	4.84	Homo sapiens	0	0	0	2	0	0	0	0	0	0	0	0	0	0	0	0	0	0	0.0196078	0	0	0	0	0	0	0	0	0	0	0	0	0	0	0.000232283	0	0	0	0	0	0	0	0	0	0
134	Myosin light polypeptide 6 OS=Homo sapiens GN=MYL6 PE=1 SV=2	MYL6_HUMAN	17	4.29	Homo sapiens	9	8	8	5	3	4	5	6	5	0	0	0	0	0	0	0.529412	0.470588	0.470588	0.294118	0.176471	0.235294	0.294118	0.352941	0.294118	0	0	0	0	0	0	0.00579956	0.00625996	0.00622924	0.00348424	0.0025512	0.00278934	0.00310106	0.00341349	0.0029159	0	0	0	0	0
135	Histone H4 OS=Homo sapiens GN=HIST1H4A PE=1 SV=2	H4_HUMAN	11	11.91	Homo sapiens	0	0	0	0	0	0	2	3	2	0	0	0	0	0	0	0	0	0	0	0	0	0.181818	0.272727	0.181818	0	0	0	0	0	0	0	0	0	0	0	0	0.00191702	0.00263769	0.00180255	0	0	0	0	0
136	Integrin-linked protein kinase OS=Homo sapiens GN=ILK PE=1 SV=2	ILK_HUMAN	51	8.18	Homo sapiens	7	4	4	4	2	2	3	4	3	0	0	0	0	0	0	0.137255	0.0784314	0.0784314	0.0784314	0.0392157	0.0392157	0.0588235	0.0784314	0.0588235	0	0	0	0	0	0	0.00150359	0.00104333	0.00103821	0.000929132	0.000566933	0.00046489	0.000620211	0.000758553	0.000583179	0	0	0	0	0
137	Pleckstrin OS=Homo sapiens GN=PLEK PE=1 SV=3	PLEK_HUMAN	40	8.45	Homo sapiens	6	5	7	6	4	7	8	7	7	0	0	0	0	0	0	0.15	0.125	0.175	0.15	0.1	0.175	0.2	0.175	0.175	0	0	0	0	0	0	0.00164321	0.0016628	0.0023165	0.00177696	0.00144568	0.00207457	0.00210872	0.00169252	0.00173496	0	0	0	0	0
138	Immunoglobulin J chain OS=Homo sapiens GN=IGJ PE=1 SV=4	IGJ_HUMAN	18	4.87	Homo sapiens	5	2	3	3	2	3	5	3	4	2	2	2	3	2	2	0.277778	0.111111	0.166667	0.166667	0.111111	0.166667	0.277778	0.166667	0.222222	0.111111	0.111111	0.111111	0.166667	0.111111	0.111111	0.00304298	0.00147805	0.00220619	0.00197441	0.00160631	0.00197578	0.00292878	0.00161192	0.00220312	0.00123947	0.00113408	0.00109305	0.00168023	0.00113091
139	78 kDa glucose-regulated protein OS=Homo sapiens GN=HSPA5 PE=1 SV=2	GRP78_HUMAN	72	4.8	Homo sapiens	5	5	4	0	2	0	5	6	2	0	0	0	0	0	0	0.0694444	0.0694444	0.0555556	0	0.0277778	0	0.0694444	0.0833333	0.0277778	0	0	0	0	0	0	0.000760745	0.000923779	0.000735397	0	0.000401577	0	0.000732194	0.000805962	0.00027539	0	0	0	0	0
140	Phosphatidylinositol-glycan-specific phospholipase D OS=Homo sapiens GN=GPLD1 PE=1 SV=3	PHLD_HUMAN	92	6.33	Homo sapiens	0	0	0	0	0	0	0	0	0	0	3	2	2	0	0	0	0	0	0	0	0	0	0	0	0	0.0326087	0.0217391	0.0217391	0	0	0	0	0	0	0	0	0	0	0	0	0.000332828	0.000213858	0.000219161	0
141	Fermitin family homolog 3 OS=Homo sapiens GN=FERMT3 PE=1 SV=1	URP2_HUMAN	76	6.98	Homo sapiens	4	0	0	5	0	2	3	4	4	0	0	0	0	0	0	0.0526316	0	0	0.0657895	0	0.0263158	0.0394737	0.0526316	0.0526316	0	0	0	0	0	0	0.000576564	0	0	0.00077937	0	0.000311966	0.000416194	0.000509029	0.000521792	0	0	0	0	0
142	Ficolin-3 OS=Homo sapiens GN=FCN3 PE=1 SV=2	FCN3_HUMAN	33	6.66	Homo sapiens	0	3	2	0	2	0	0	0	0	3	3	2	3	3	3	0	0.0909091	0.0606061	0	0.0606061	0	0	0	0	0.0909091	0.0909091	0.0606061	0.0909091	0.0909091	0.0909091	0	0.00120931	0.000802251	0	0.000876169	0	0	0	0	0.00101411	0.000927885	0.000596211	0.000916489	0.000925293
143	Complement factor H-related protein 5 OS=Homo sapiens GN=CFHR5 PE=1 SV=1	FHR5_HUMAN	64	7.08	Homo sapiens	0	0	2	0	0	0	2	0	0	0	0	0	0	0	0	0	0	0.03125	0	0	0	0.03125	0	0	0	0	0	0	0	0	0	0	0.000413661	0	0	0	0.000329487	0	0	0	0	0	0	0
144	Spectrin beta chain, erythrocytic OS=Homo sapiens GN=SPTB PE=1 SV=5	SPTB1_HUMAN	246	4.92	Homo sapiens	0	0	0	0	0	0	0	0	0	0	0	0	0	0	0	0	0	0	0	0	0	0	0	0	0	0	0	0	0	0	0	0	0	0	0	0	0	0	0	0	0	0	0	0
145	Platelet basic protein OS=Homo sapiens GN=PPBP PE=1 SV=3	CXCL7_HUMAN	14	9.07	Homo sapiens	10	12	13	4	2	2	14	13	12	0	0	0	0	0	0	0.714286	0.857143	0.928571	0.285714	0.142857	0.142857	1	0.928571	0.857143	0	0	0	0	0	0	0.0078248	0.0114021	0.0122916	0.00338469	0.00206525	0.00169353	0.0105436	0.00898072	0.00849776	0	0	0	0	0
146	Fibulin-1 OS=Homo sapiens GN=FBLN1 PE=1 SV=4	FBLN1_HUMAN	77	4.86	Homo sapiens	0	0	0	0	0	0	0	0	0	0	0	0	0	6	6	0	0	0	0	0	0	0	0	0	0	0	0	0	0.0779221	0.0779221	0	0	0	0	0	0	0	0	0	0	0	0	0	0.000793108
147	Keratin, type I cytoskeletal 17 OS=Homo sapiens GN=KRT17 PE=1 SV=2	K1C17_HUMAN	48	4.67	Homo sapiens	0	0	0	6	0	6	26	34	32	0	0	7	0	21	23	0	0	0	0.125	0	0.125	0.541667	0.708333	0.666667	0	0	0.145833	0	0.4375	0.479167	0	0	0	0.0014808	0	0.00148184	0.00571111	0.00685068	0.00660937	0	0	0.00143463	0	0.00445297
148	Ig kappa chain V-III region HAH OS=Homo sapiens PE=2 SV=1	KV312_HUMAN	14	8.18	Homo sapiens	3	0	2	2	2	3	0	3	4	0	3	2	3	2	4	0.214286	0	0.142857	0.142857	0.142857	0.214286	0	0.214286	0.285714	0	0.214286	0.142857	0.214286	0.142857	0.285714	0.00234744	0	0.00189102	0.00169235	0.00206525	0.00254029	0	0.00207247	0.00283259	0	0.00218716	0.00140536	0.0021603	0.00145403
149	Protein S100-A9 OS=Homo sapiens GN=S100A9 PE=1 SV=1	S10A9_HUMAN	13	6.07	Homo sapiens	0	0	0	0	0	0	13	14	14	2	2	2	2	2	0	0	0	0	0	0	0	1	1.07692	1.07692	0.153846	0.153846	0.153846	0.153846	0.153846	0	0	0	0	0	0	0	0.0105436	0.0104155	0.0106767	0.00171618	0.00157027	0.00151346	0.00155098	0.00156588
150	Alpha-1-acid glycoprotein 2 OS=Homo sapiens GN=ORM2 PE=1 SV=2	A1AG2_HUMAN	24	4.76	Homo sapiens	0	0	3	4	0	0	0	3	3	9	8	8	9	5	5	0	0	0.125	0.166667	0	0	0	0.125	0.125	0.375	0.333333	0.333333	0.375	0.208333	0.208333	0	0	0.00165464	0.00197441	0	0	0	0.00120894	0.00123926	0.0041832	0.00340224	0.00327916	0.00378052	0.00212046
151	Ras-related protein Rap-1b OS=Homo sapiens GN=RAP1B PE=1 SV=1	RAP1B_HUMAN	21	5.39	Homo sapiens	3	5	4	3	4	6	4	6	7	0	0	0	0	0	0	0.142857	0.238095	0.190476	0.142857	0.190476	0.285714	0.190476	0.285714	0.333333	0	0	0	0	0	0	0.00156496	0.00316724	0.00252136	0.00169235	0.00275367	0.00338706	0.0020083	0.0027633	0.00330468	0	0	0	0	0
152	Complement component C8 gamma chain OS=Homo sapiens GN=C8G PE=1 SV=3	CO8G_HUMAN	22	8.48	Homo sapiens	3	0	0	0	0	0	3	0	2	0	0	0	0	0	0	0.136364	0	0	0	0	0	0.136364	0	0.0909091	0	0	0	0	0	0	0.00149383	0	0	0	0	0	0.00143776	0	0.000901277	0	0	0	0	0
153	Ankyrin-1 OS=Homo sapiens GN=ANK1 PE=1 SV=3	ANK1_HUMAN	206	5.92	Homo sapiens	0	0	0	0	0	0	0	0	0	0	0	0	0	0	0	0	0	0	0	0	0	0	0	0	0	0	0	0	0	0	0	0	0	0	0	0	0	0	0	0	0	0	0	0
154	Protein S100-A8 OS=Homo sapiens GN=S100A8 PE=1 SV=1	S10A8_HUMAN	11	7.07	Homo sapiens	0	0	0	0	0	0	14	13	15	0	4	0	2	3	0	0	0	0	0	0	0	1.27273	1.18182	1.36364	0	0.363636	0	0.181818	0.272727	0	0	0	0	0	0	0	0.0134191	0.01143	0.0135192	0	0.00371154	0	0.00183298	0.00277588
155	Ig heavy chain V-III region 23 OS=Homo sapiens GN=IGHV3-23 PE=1 SV=2	HV303_HUMAN	13	8.46	Homo sapiens	3	0	0	2	0	2	2	0	0	0	2	0	3	2	4	0.230769	0	0	0.153846	0	0.153846	0.153846	0	0	0	0.153846	0	0.230769	0.153846	0.307692	0.00252801	0	0	0.00182253	0	0.0018238	0.00162209	0	0	0	0.00157027	0	0.00232647	0.00156588
156	Cofilin-1 OS=Homo sapiens GN=CFL1 PE=1 SV=3	COF1_HUMAN	19	8.29	Homo sapiens	2	2	4	0	0	0	6	5	5	0	0	0	0	0	0	0.105263	0.105263	0.210526	0	0	0	0.315789	0.263158	0.263158	0	0	0	0	0	0	0.00115313	0.00140025	0.00278677	0	0	0	0.00332955	0.00254514	0.00260896	0	0	0	0	0
157	Profilin-1 OS=Homo sapiens GN=PFN1 PE=1 SV=2	PROF1_HUMAN	15	8.46	Homo sapiens	4	4	3	0	0	0	5	3	3	0	0	0	0	0	0	0.266667	0.266667	0.2	0	0	0	0.333333	0.2	0.2	0	0	0	0	0	0	0.00292126	0.00354731	0.00264743	0	0	0	0.00351453	0.00193431	0.00198281	0	0	0	0	0
158	Collectin-11 OS=Homo sapiens GN=COLEC11 PE=1 SV=1	COL11_HUMAN	29	5.06	Homo sapiens	11	8	8	7	7	7	9	8	8	2	3	3	3	3	3	0.37931	0.275862	0.275862	0.241379	0.241379	0.241379	0.310345	0.275862	0.275862	0.0689655	0.103448	0.103448	0.103448	0.103448	0.103448	0.00415524	0.00366963	0.00365162	0.00285948	0.00348957	0.00286148	0.00327215	0.00266801	0.00273491	0.000769324	0.00105587	0.00101767	0.0010429	0.00105292
159	Afamin OS=Homo sapiens GN=AFM PE=1 SV=1	AFAM_HUMAN	69	5.7	Homo sapiens	0	0	0	0	0	0	0	0	0	4	6	6	5	4	2	0	0	0	0	0	0	0	0	0	0.057971	0.0869565	0.0869565	0.0724638	0.057971	0.0289855	0	0	0	0	0	0	0	0	0	0.000646678	0.000887542	0.000855434	0.000730535	0.000590042
160	Serum amyloid P-component OS=Homo sapiens GN=APCS PE=1 SV=2	SAMP_HUMAN	25	6.52	Homo sapiens	0	0	0	0	0	0	0	0	0	5	5	5	5	4	5	0	0	0	0	0	0	0	0	0	0.2	0.2	0.2	0.2	0.16	0.2	0	0	0	0	0	0	0	0	0	0.00223104	0.00204135	0.0019675	0.00201628	0.00162852
161	Platelet glycoprotein IX OS=Homo sapiens GN=GP9 PE=1 SV=3	GPIX_HUMAN	19	6.32	Homo sapiens	8	5	4	0	0	2	4	6	4	0	0	0	0	0	0	0.421053	0.263158	0.210526	0	0	0.105263	0.210526	0.315789	0.210526	0	0	0	0	0	0	0.00461252	0.00350063	0.00278677	0	0	0.00124786	0.0022197	0.00305417	0.00208717	0	0	0	0	0
162	Selenoprotein P OS=Homo sapiens GN=SEPP1 PE=1 SV=3	SEPP1_HUMAN	43	7.92	Homo sapiens	0	0	0	0	0	0	0	0	0	4	4	4	4	5	5	0	0	0	0	0	0	0	0	0	0.0930233	0.0930233	0.0930233	0.0930233	0.116279	0.116279	0	0	0	0	0	0	0	0	0	0.00103769	0.000949463	0.000915115	0.000937803	0.00118351
163	Coagulation factor XIII A chain OS=Homo sapiens GN=F13A1 PE=1 SV=4	F13A_HUMAN	83	5.95	Homo sapiens	2	0	2	0	0	0	0	4	0	4	0	3	2	3	4	0.0240964	0	0.0240964	0	0	0	0	0.0481928	0	0.0481928	0	0.0361446	0.0240964	0.0361446	0.0481928	0.000263969	0	0.000318967	0	0	0	0	0.000466099	0	0.0005376	0	0.000355572	0.000242925	0.000367887
164	Apolipoprotein C-IV OS=Homo sapiens GN=APOC4 PE=1 SV=1	APOC4_HUMAN	15	9.13	Homo sapiens	0	0	0	0	0	0	0	0	0	8	7	5	6	8	8	0	0	0	0	0	0	0	0	0	0.533333	0.466667	0.333333	0.4	0.533333	0.533333	0	0	0	0	0	0	0	0	0	0.00594944	0.00476314	0.00327916	0.00403255	0.00542838
165	Platelet glycoprotein Ib alpha chain OS=Homo sapiens GN=GP1BA PE=1 SV=2	GP1BA_HUMAN	72	6.24	Homo sapiens	0	3	0	0	0	0	0	0	2	0	0	0	0	0	0	0	0.0416667	0	0	0	0	0	0	0.0277778	0	0	0	0	0	0	0	0.000554267	0	0	0	0	0	0	0.00027539	0	0	0	0	0
166	Keratin, type I cytoskeletal 14 OS=Homo sapiens GN=KRT14 PE=1 SV=4	K1C14_HUMAN	52	4.81	Homo sapiens	0	0	0	11	12	0	28	31	24	14	12	0	0	34	33	0	0	0	0.211538	0.230769	0	0.538462	0.596154	0.461538	0.269231	0.230769	0	0	0.653846	0.634615	0	0	0	0.00250598	0.00333618	0	0.00567732	0.00576573	0.00457571	0.00300332	0.0023554	0	0	0.00665499
167	Plasma kallikrein OS=Homo sapiens GN=KLKB1 PE=1 SV=1	KLKB1_HUMAN	71	8.26	Homo sapiens	0	0	0	0	0	0	0	0	0	5	5	6	4	4	6	0	0	0	0	0	0	0	0	0	0.0704225	0.0704225	0.084507	0.056338	0.056338	0.084507	0	0	0	0	0	0	0	0	0	0.000785577	0.000718784	0.000831337	0.000567965	0.000573421
168	Pyruvate kinase PKM OS=Homo sapiens GN=PKM PE=1 SV=4	KPYM_HUMAN	58	7.94	Homo sapiens	0	2	4	0	0	2	3	6	6	0	0	0	0	0	0	0	0.0344828	0.0689655	0	0	0.0344828	0.0517241	0.103448	0.103448	0	0	0	0	0	0	0	0.000458704	0.000912906	0	0	0.000408783	0.000545358	0.0010005	0.00102559	0	0	0	0	0
169	Fructose-bisphosphate aldolase A OS=Homo sapiens GN=ALDOA PE=1 SV=2	ALDOA_HUMAN	39	8.2	Homo sapiens	0	3	3	0	0	0	7	8	7	0	0	0	0	0	0	0	0.0769231	0.0769231	0	0	0	0.179487	0.205128	0.179487	0	0	0	0	0	0	0	0.00102326	0.00101824	0	0	0	0.00189244	0.00198391	0.00177944	0	0	0	0	0
170	Lactotransferrin OS=Homo sapiens GN=LTF PE=1 SV=6	TRFL_HUMAN	78	8.17	Homo sapiens	0	0	0	0	0	0	0	0	0	0	0	0	0	0	0	0	0	0	0	0	0	0	0	0	0	0	0	0	0	0	0	0	0	0	0	0	0	0	0	0	0	0	0	0
171	Neutrophil defensin 1 OS=Homo sapiens GN=DEFA1 PE=1 SV=1	DEF1_HUMAN	10	7.04	Homo sapiens	0	0	0	0	0	0	2	2	0	2	2	2	2	2	2	0	0	0	0	0	0	0.2	0.2	0	0.2	0.2	0.2	0.2	0.2	0.2	0	0	0	0	0	0	0.00210872	0.00193431	0	0.00223104	0.00204135	0.0019675	0.00201628	0.00203564
172	Clathrin heavy chain 1 OS=Homo sapiens GN=CLTC PE=1 SV=5	CLH1_HUMAN	192	5.42	Homo sapiens	3	0	0	0	0	0	3	2	4	0	0	0	0	0	0	0.015625	0	0	0	0	0	0.015625	0.0104167	0.0208333	0	0	0	0	0	0	0.000171168	0	0	0	0	0	0.000164744	0.000100745	0.000206543	0	0	0	0	0
173	Integrin alpha-M OS=Homo sapiens GN=ITGAM PE=1 SV=2	ITAM_HUMAN	127	7.24	Homo sapiens	0	0	0	0	0	0	0	0	0	0	0	0	0	0	0	0	0	0	0	0	0	0	0	0	0	0	0	0	0	0	0	0	0	0	0	0	0	0	0	0	0	0	0	0
174	N-acetylmuramoyl-L-alanine amidase OS=Homo sapiens GN=PGLYRP2 PE=1 SV=1	PGRP2_HUMAN	62	7.59	Homo sapiens	0	0	2	0	3	4	3	3	0	3	0	3	2	3	2	0	0	0.0322581	0	0.0483871	0.0645161	0.0483871	0.0483871	0	0.0483871	0	0.0483871	0.0322581	0.0483871	0.0322581	0	0	0.000427004	0	0.000699522	0.000764819	0.000510174	0.000467978	0	0.000539768	0	0.000476007	0.000325206	0.000492494
175	Integrin beta-1 OS=Homo sapiens GN=ITGB1 PE=1 SV=2	ITB1_HUMAN	88	5.04	Homo sapiens	3	4	2	0	0	0	0	2	2	0	0	0	0	0	0	0.0340909	0.0454545	0.0227273	0	0	0	0	0.0227273	0.0227273	0	0	0	0	0	0	0.000373457	0.000604655	0.000300844	0	0	0	0	0.000219808	0.000225319	0	0	0	0	0
176	Myeloperoxidase OS=Homo sapiens GN=MPO PE=1 SV=1	PERM_HUMAN	84	9.14	Homo sapiens	0	0	0	0	0	0	0	0	0	0	0	0	0	0	0	0	0	0	0	0	0	0	0	0	0	0	0	0	0	0	0	0	0	0	0	0	0	0	0	0	0	0	0	0
177	Cholesteryl ester transfer protein OS=Homo sapiens GN=CETP PE=1 SV=2	CETP_HUMAN	55	6.02	Homo sapiens	0	0	0	0	0	0	0	2	0	4	4	3	3	6	6	0	0	0	0	0	0	0	0.0363636	0	0.0727273	0.0727273	0.0545455	0.0545455	0.109091	0.109091	0	0	0	0	0	0	0	0.000351693	0	0.000811287	0.000742308	0.00053659	0.000549894	0.00111035
178	Cartilage acidic protein 1 OS=Homo sapiens GN=CRTAC1 PE=1 SV=2	CRAC1_HUMAN	71	4.73	Homo sapiens	5	2	6	4	4	5	3	4	4	0	0	0	0	0	0	0.0704225	0.028169	0.084507	0.056338	0.056338	0.0704225	0.0422535	0.056338	0.056338	0	0	0	0	0	0	0.000771459	0.000374716	0.00111863	0.000667405	0.000814467	0.000834838	0.000445504	0.000544876	0.000558538	0	0	0	0	0
179	CD44 antigen OS=Homo sapiens GN=CD44 PE=1 SV=3	CD44_HUMAN	82	5	Homo sapiens	3	3	2	4	4	3	0	2	3	0	0	0	0	0	0	0.0365854	0.0365854	0.0243902	0.0487805	0.0487805	0.0365854	0	0.0243902	0.0365854	0	0	0	0	0	0	0.000400783	0.000486674	0.000322857	0.000577875	0.000705209	0.000433709	0	0.000235891	0.000362709	0	0	0	0	0
180	Ig mu heavy chain disease protein OS=Homo sapiens PE=1 SV=1	MUCB_HUMAN	43	4.89	Homo sapiens	18	0	13	18	0	17	0	0	19	0	0	0	0	0	0	0.418605	0	0.302326	0.418605	0	0.395349	0	0	0.44186	0	0	0	0	0	0	0.0045857	0	0.00400193	0.00495897	0	0.00468674	0	0	0.00438063	0	0	0	0	0
181	Heat shock cognate 71 kDa protein OS=Homo sapiens GN=HSPA8 PE=1 SV=1	HSP7C_HUMAN	71	5.16	Homo sapiens	7	4	7	3	0	0	8	9	7	0	0	0	0	0	0	0.0985915	0.056338	0.0985915	0.0422535	0	0	0.112676	0.126761	0.0985915	0	0	0	0	0	0	0.00108004	0.000749432	0.00130507	0.000500553	0	0	0.00118801	0.00122597	0.000977441	0	0	0	0	0
182	Glucosidase 2 subunit beta OS=Homo sapiens GN=PRKCSH PE=1 SV=2	GLU2B_HUMAN	59	4.05	Homo sapiens	0	0	0	0	2	2	0	3	2	0	0	0	0	0	0	0	0	0	0	0.0338983	0.0338983	0	0.0508475	0.0338983	0	0	0	0	0	0	0	0	0	0	0.00049006	0.000401854	0	0.000491774	0.000336069	0	0	0	0	0
183	Serum deprivation-response protein OS=Homo sapiens GN=SDPR PE=1 SV=3	SDPR_HUMAN	47	4.88	Homo sapiens	5	2	3	2	0	2	2	5	3	0	0	0	0	0	0	0.106383	0.0425532	0.0638298	0.0425532	0	0.0425532	0.0425532	0.106383	0.0638298	0	0	0	0	0	0	0.0011654	0.00056606	0.000844924	0.000504103	0	0.000504455	0.000448663	0.00102889	0.000632812	0	0	0	0	0
184	WD repeat-containing protein 1 OS=Homo sapiens GN=WDR1 PE=1 SV=4	WDR1_HUMAN	66	6.64	Homo sapiens	2	0	0	0	0	0	2	0	0	0	0	0	0	0	0	0.030303	0	0	0	0	0	0.030303	0	0	0	0	0	0	0	0	0.000331961	0	0	0	0	0	0.000319503	0	0	0	0	0	0	0
185	Latent-transforming growth factor beta-binding protein 1 OS=Homo sapiens GN=LTBP1 PE=1 SV=4	LTBP1_HUMAN	187	5.85	Homo sapiens	5	3	4	0	0	0	4	5	6	0	0	0	0	0	0	0.026738	0.0160428	0.0213904	0	0	0	0.0213904	0.026738	0.0320856	0	0	0	0	0	0	0.000292907	0.000213408	0.000283147	0	0	0	0.000225531	0.000258597	0.000318098	0	0	0	0	0
186	Ig gamma-4 chain C region OS=Homo sapiens GN=IGHG4 PE=1 SV=1	IGHG4_HUMAN	36	7.41	Homo sapiens	22	21	20	18	21	18	0	0	0	0	0	0	0	0	0	0.611111	0.583333	0.555556	0.5	0.583333	0.5	0	0	0	0	0	0	0	0	0	0.00669455	0.00775974	0.00735397	0.00592322	0.00843312	0.00592735	0	0	0	0	0	0	0	0
187	HLA class I histocompatibility antigen, A-24 alpha chain OS=Homo sapiens GN=HLA-A PE=1 SV=2	1A24_HUMAN	41	6.29	Homo sapiens	5	0	2	2	0	0	7	5	2	0	0	0	0	0	0	0.121951	0	0.0487805	0.0487805	0	0	0.170732	0.121951	0.0487805	0	0	0	0	0	0	0.00133594	0	0.000645714	0.000577875	0	0	0.00180013	0.00117946	0.000483612	0	0	0	0	0
188	Desmoplakin OS=Homo sapiens GN=DSP PE=1 SV=3	DESP_HUMAN	332	6.78	Homo sapiens	0	0	0	0	0	0	17	13	15	0	0	0	0	2	3	0	0	0	0	0	0	0.0512048	0.0391566	0.0451807	0	0	0	0	0.0060241	0.00903614	0	0	0	0	0	0	0.000539883	0.000378705	0.000447924	0	0	0	0	6.13146e-05
189	Sushi, von Willebrand factor type A, EGF and pentraxin domain-containing protein 1 OS=Homo sapiens GN=SVEP1 PE=1 SV=3	SVEP1_HUMAN	390	5.2	Homo sapiens	0	3	4	4	0	3	0	3	2	0	0	0	0	0	0	0	0.00769231	0.0102564	0.0102564	0	0.00769231	0	0.00769231	0.00512821	0	0	0	0	0	0	0	0.000102326	0.000135766	0.000121502	0	9.119e-05	0	7.43965e-05	5.08413e-05	0	0	0	0	0
190	Apolipoprotein A-V OS=Homo sapiens GN=APOA5 PE=1 SV=1	APOA5_HUMAN	41	6.4	Homo sapiens	3	2	0	2	2	3	2	0	0	4	3	2	2	0	2	0.0731707	0.0487805	0	0.0487805	0.0487805	0.0731707	0.0487805	0	0	0.097561	0.0731707	0.0487805	0.0487805	0	0.0487805	0.000801565	0.000648898	0	0.000577875	0.000705209	0.000867417	0.000514321	0	0	0.00108831	0.000746834	0.000479877	0.000491775	0
191	Galectin-3-binding protein OS=Homo sapiens GN=LGALS3BP PE=1 SV=1	LG3BP_HUMAN	65	4.9	Homo sapiens	0	0	0	0	0	0	0	0	0	0	0	0	0	0	0	0	0	0	0	0	0	0	0	0	0	0	0	0	0	0	0	0	0	0	0	0	0	0	0	0	0	0	0	0
192	Calreticulin OS=Homo sapiens GN=CALR PE=1 SV=1	CALR_HUMAN	48	4.04	Homo sapiens	0	0	0	0	0	0	0	0	0	0	0	0	0	0	0	0	0	0	0	0	0	0	0	0	0	0	0	0	0	0	0	0	0	0	0	0	0	0	0	0	0	0	0	0
193	Mannosyl-oligosaccharide 1,2-alpha-mannosidase IA OS=Homo sapiens GN=MAN1A1 PE=1 SV=3	MA1A1_HUMAN	73	6.44	Homo sapiens	0	0	0	0	0	0	0	0	0	3	4	2	2	0	5	0	0	0	0	0	0	0	0	0	0.0410959	0.0547945	0.0273973	0.0273973	0	0.0684932	0	0	0	0	0	0	0	0	0	0.000458433	0.000559273	0.00026952	0.000276202	0
194	Ig lambda chain V-III region LOI OS=Homo sapiens PE=1 SV=1	LV302_HUMAN	12	4.72	Homo sapiens	0	2	2	0	2	0	2	0	0	0	0	0	0	0	0	0	0.166667	0.166667	0	0.166667	0	0.166667	0	0	0	0	0	0	0	0	0	0.00221707	0.00220619	0	0.00240946	0	0.00175727	0	0	0	0	0	0	0
195	Serum paraoxonase/lactonase 3 OS=Homo sapiens GN=PON3 PE=1 SV=3	PON3_HUMAN	40	5.1	Homo sapiens	3	0	0	0	4	3	0	0	0	0	3	0	0	0	0	0.075	0	0	0	0.1	0.075	0	0	0	0	0.075	0	0	0	0	0.000821604	0	0	0	0.00144568	0.000889103	0	0	0	0	0.000765505	0	0	0
196	Peptidyl-prolyl cis-trans isomerase A OS=Homo sapiens GN=PPIA PE=1 SV=2	PPIA_HUMAN	18	7.97	Homo sapiens	2	0	2	0	0	0	4	2	3	0	0	0	0	0	0	0.111111	0	0.111111	0	0	0	0.222222	0.111111	0.166667	0	0	0	0	0	0	0.00121719	0	0.00147079	0	0	0	0.00234302	0.00107462	0.00165234	0	0	0	0	0
197	SPARC-like protein 1 OS=Homo sapiens GN=SPARCL1 PE=1 SV=2	SPRL1_HUMAN	75	4.45	Homo sapiens	0	2	2	5	5	5	0	3	2	0	0	0	0	0	0	0	0.0266667	0.0266667	0.0666667	0.0666667	0.0666667	0	0.04	0.0266667	0	0	0	0	0	0	0	0.000354731	0.00035299	0.000789762	0.000963785	0.000790313	0	0.000386862	0.000264375	0	0	0	0	0
198	Actin, alpha cardiac muscle 1 OS=Homo sapiens GN=ACTC1 PE=1 SV=1	ACTC_HUMAN	42	5.05	Homo sapiens	25	19	21	0	0	0	0	24	0	0	0	0	0	0	0	0.595238	0.452381	0.5	0	0	0	0	0.571429	0	0	0	0	0	0	0	0.00652067	0.00601776	0.00661857	0	0	0	0	0.0055266	0	0	0	0	0	0
199	LIM and senescent cell antigen-like-containing domain protein 1 OS=Homo sapiens GN=LIMS1 PE=1 SV=4	LIMS1_HUMAN	37	8.08	Homo sapiens	3	2	2	0	0	0	0	4	3	0	0	0	0	0	0	0.0810811	0.0540541	0.0540541	0	0	0	0	0.108108	0.0810811	0	0	0	0	0	0	0.000888221	0.000719049	0.000715521	0	0	0	0	0.00104557	0.000803842	0	0	0	0	0
200	Dermcidin OS=Homo sapiens GN=DCD PE=1 SV=2	DCD_HUMAN	11	6.52	Homo sapiens	0	0	0	0	0	0	0	0	0	3	3	2	3	2	2	0	0	0	0	0	0	0	0	0	0.272727	0.272727	0.181818	0.272727	0.181818	0.181818	0	0	0	0	0	0	0	0	0	0.00304233	0.00278365	0.00178863	0.00274947	0.00185059
201	Histone H2B type 1-C/E/F/G/I OS=Homo sapiens GN=HIST1H2BC PE=1 SV=4	H2B1C_HUMAN	14	11	Homo sapiens	0	0	0	0	0	0	0	0	0	0	0	0	0	0	0	0	0	0	0	0	0	0	0	0	0	0	0	0	0	0	0	0	0	0	0	0	0	0	0	0	0	0	0	0
202	Mannan-binding lectin serine protease 2 OS=Homo sapiens GN=MASP2 PE=1 SV=4	MASP2_HUMAN	76	5.37	Homo sapiens	0	0	0	0	0	0	0	0	0	0	0	0	0	0	0	0	0	0	0	0	0	0	0	0	0	0	0	0	0	0	0	0	0	0	0	0	0	0	0	0	0	0	0	0
203	Nidogen-1 OS=Homo sapiens GN=NID1 PE=1 SV=3	NID1_HUMAN	136	4.93	Homo sapiens	2	2	5	2	3	3	4	3	3	0	0	2	0	0	0	0.0147059	0.0147059	0.0367647	0.0147059	0.0220588	0.0220588	0.0294118	0.0220588	0.0220588	0	0	0.0147059	0	0	0	0.000161099	0.000195624	0.000486659	0.000174212	0.0003189	0.000261501	0.000310106	0.000213343	0.000218692	0	0	0.000144669	0	0
204	Heat shock protein HSP 90-alpha OS=Homo sapiens GN=HSP90AA1 PE=1 SV=5	HS90A_HUMAN	85	4.66	Homo sapiens	2	2	0	0	0	3	3	2	0	0	0	0	0	0	0	0.0235294	0.0235294	0	0	0	0.0352941	0.0352941	0.0235294	0	0	0	0	0	0	0	0.000257758	0.000312998	0	0	0	0.000418401	0.000372127	0.000227566	0	0	0	0	0	0
205	SPARC OS=Homo sapiens GN=SPARC PE=1 SV=1	SPRC_HUMAN	35	4.47	Homo sapiens	2	2	0	0	0	0	2	2	0	0	0	0	0	0	0	0.0571429	0.0571429	0	0	0	0	0.0571429	0.0571429	0	0	0	0	0	0	0	0.000625984	0.000760138	0	0	0	0	0.000602491	0.00055266	0	0	0	0	0	0
206	Ig heavy chain V-III region GAL OS=Homo sapiens PE=1 SV=1	HV320_HUMAN	13	8.7	Homo sapiens	3	0	2	0	2	0	2	3	3	0	2	0	0	2	2	0.230769	0	0.153846	0	0.153846	0	0.153846	0.230769	0.230769	0	0.153846	0	0	0.153846	0.153846	0.00252801	0	0.00203648	0	0.00222412	0	0.00162209	0.0022319	0.00228786	0	0.00157027	0	0	0.00156588
207	Insulin-like growth factor-binding protein complex acid labile subunit OS=Homo sapiens GN=IGFALS PE=1 SV=1	ALS_HUMAN	66	6.78	Homo sapiens	4	2	3	2	0	2	4	3	0	2	2	0	0	0	0	0.0606061	0.030303	0.0454545	0.030303	0	0.030303	0.0606061	0.0454545	0	0.030303	0.030303	0	0	0	0	0.000663923	0.000403103	0.000601688	0.000358983	0	0.000359233	0.000639005	0.000439616	0	0.000338036	0.000309295	0	0	0
208	Filaggrin-2 OS=Homo sapiens GN=FLG2 PE=1 SV=1	FILA2_HUMAN	248	8.35	Homo sapiens	0	0	0	0	2	2	4	7	4	0	0	0	0	0	0	0	0	0	0	0.00806452	0.00806452	0.016129	0.0282258	0.016129	0	0	0	0	0	0	0	0	0	0	0.000116587	9.56024e-05	0.000170058	0.000272987	0.000159904	0	0	0	0	0
209	Proprotein convertase subtilisin/kexin type 9 OS=Homo sapiens GN=PCSK9 PE=1 SV=3	PCSK9_HUMAN	74	6.59	Homo sapiens	0	0	0	0	0	0	0	0	0	3	4	3	3	2	3	0	0	0	0	0	0	0	0	0	0.0405405	0.0540541	0.0405405	0.0405405	0.027027	0.0405405	0	0	0	0	0	0	0	0	0	0.000452238	0.000551715	0.000398817	0.000408705	0.000275087
210	Isocitrate dehydrogenase [NADP], mitochondrial OS=Homo sapiens GN=IDH2 PE=1 SV=2	IDHP_HUMAN	51	8.95	Homo sapiens	2	2	4	0	0	0	2	5	3	0	0	0	0	0	0	0.0392157	0.0392157	0.0784314	0	0	0	0.0392157	0.0980392	0.0588235	0	0	0	0	0	0	0.000429597	0.000521663	0.00103821	0	0	0	0.000413474	0.000948191	0.000583179	0	0	0	0	0
211	Carboxypeptidase N catalytic chain OS=Homo sapiens GN=CPN1 PE=1 SV=1	CBPN_HUMAN	52	7.36	Homo sapiens	0	0	0	0	0	0	0	0	0	0	2	0	0	0	0	0	0	0	0	0	0	0	0	0	0	0.0384615	0	0	0	0	0	0	0	0	0	0	0	0	0	0	0.000392567	0	0	0
212	Complement factor H-related protein 1 OS=Homo sapiens GN=CFHR1 PE=1 SV=2	FHR1_HUMAN	38	7.42	Homo sapiens	0	0	5	0	0	2	6	0	7	0	0	0	0	0	0	0	0	0.131579	0	0	0.0526316	0.157895	0	0.184211	0	0	0	0	0	0	0	0	0.00174173	0	0	0.000623932	0.00166478	0	0.00182627	0	0	0	0	0
213	Protein S100-A7 OS=Homo sapiens GN=S100A7 PE=1 SV=4	S10A7_HUMAN	11	6.78	Homo sapiens	0	0	0	2	0	0	21	23	20	0	0	0	0	0	0	0	0	0	0.181818	0	0	1.90909	2.09091	1.81818	0	0	0	0	0	0	0	0	0	0.0021539	0	0	0.0201287	0.0202223	0.0180255	0	0	0	0	0
214	ATP synthase subunit beta, mitochondrial OS=Homo sapiens GN=ATP5B PE=1 SV=3	ATPB_HUMAN	57	5.07	Homo sapiens	4	0	3	0	0	0	4	7	4	0	0	0	0	0	0	0.0701754	0	0.0526316	0	0	0	0.0701754	0.122807	0.0701754	0	0	0	0	0	0	0.000768753	0	0.000696691	0	0	0	0.000739901	0.00118773	0.000695723	0	0	0	0	0
215	Fibrinogen-like protein 1 OS=Homo sapiens GN=FGL1 PE=1 SV=3	FGL1_HUMAN	36	5.67	Homo sapiens	0	0	0	0	0	0	0	0	0	0	0	0	0	0	0	0	0	0	0	0	0	0	0	0	0	0	0	0	0	0	0	0	0	0	0	0	0	0	0	0	0	0	0	0
216	Histone H2A.J OS=Homo sapiens GN=H2AFJ PE=1 SV=1	H2AJ_HUMAN	14	11.55	Homo sapiens	0	0	0	0	0	0	0	0	0	0	0	0	0	0	0	0	0	0	0	0	0	0	0	0	0	0	0	0	0	0	0	0	0	0	0	0	0	0	0	0	0	0	0	0
217	Ig heavy chain V-III region TRO OS=Homo sapiens PE=1 SV=1	HV301_HUMAN	13	10	Homo sapiens	0	0	0	0	0	0	0	0	0	0	0	0	0	0	0	0	0	0	0	0	0	0	0	0	0	0	0	0	0	0	0	0	0	0	0	0	0	0	0	0	0	0	0	0
218	Ig alpha-2 chain C region OS=Homo sapiens GN=IGHA2 PE=1 SV=3	IGHA2_HUMAN	37	6.02	Homo sapiens	0	0	0	0	0	0	0	0	15	15	12	15	16	14	16	0	0	0	0	0	0	0	0	0.405405	0.405405	0.324324	0.405405	0.432432	0.378378	0.432432	0	0	0	0	0	0	0	0	0.00401921	0.00452238	0.00331029	0.00398817	0.00435952	0.00385122
219	Integrin alpha-6 OS=Homo sapiens GN=ITGA6 PE=1 SV=5	ITA6_HUMAN	127	6.57	Homo sapiens	2	2	2	0	0	0	0	0	0	0	0	0	0	0	0	0.015748	0.015748	0.015748	0	0	0	0	0	0	0	0	0	0	0	0	0.000172515	0.000209487	0.000208459	0	0	0	0	0	0	0	0	0	0	0
220	Ig kappa chain V-IV region B17 OS=Homo sapiens PE=2 SV=1	KV404_HUMAN	15	6.51	Homo sapiens	4	2	0	0	0	0	0	4	0	0	0	2	0	2	2	0.266667	0.133333	0	0	0	0	0	0.266667	0	0	0	0.133333	0	0.133333	0.133333	0.00292126	0.00177365	0	0	0	0	0	0.00257908	0	0	0	0.00131167	0	0.0013571
221	HLA class I histocompatibility antigen, B-35 alpha chain OS=Homo sapiens GN=HLA-B PE=1 SV=1	1B35_HUMAN	40	6.43	Homo sapiens	6	0	4	0	0	0	0	6	5	0	0	0	0	0	0	0.15	0	0.1	0	0	0	0	0.15	0.125	0	0	0	0	0	0	0.00164321	0	0.00132371	0	0	0	0	0.00145073	0.00123926	0	0	0	0	0
222	Tubulin alpha-1B chain OS=Homo sapiens GN=TUBA1B PE=1 SV=1	TBA1B_HUMAN	50	4.7	Homo sapiens	10	0	0	0	0	0	7	8	7	0	0	0	0	0	0	0.2	0	0	0	0	0	0.14	0.16	0.14	0	0	0	0	0	0	0.00219094	0	0	0	0	0	0.0014761	0.00154745	0.00138797	0	0	0	0	0
223	Ig heavy chain V-III region TIL OS=Homo sapiens PE=1 SV=1	HV304_HUMAN	12	9.4	Homo sapiens	2	0	0	0	0	0	0	2	0	0	0	0	0	0	0	0.166667	0	0	0	0	0	0	0.166667	0	0	0	0	0	0	0	0.00182579	0	0	0	0	0	0	0.00161192	0	0	0	0	0	0
224	Solute carrier family 2, facilitated glucose transporter member 1 OS=Homo sapiens GN=SLC2A1 PE=1 SV=2	GTR1_HUMAN	54	8.92	Homo sapiens	0	0	0	0	0	0	0	0	0	0	0	0	0	0	0	0	0	0	0	0	0	0	0	0	0	0	0	0	0	0	0	0	0	0	0	0	0	0	0	0	0	0	0	0
225	Carboxypeptidase N subunit 2 OS=Homo sapiens GN=CPN2 PE=1 SV=3	CPN2_HUMAN	61	5.89	Homo sapiens	0	0	0	0	0	0	0	0	0	0	0	0	0	0	0	0	0	0	0	0	0	0	0	0	0	0	0	0	0	0	0	0	0	0	0	0	0	0	0	0	0	0	0	0
226	L-lactate dehydrogenase B chain OS=Homo sapiens GN=LDHB PE=1 SV=2	LDHB_HUMAN	37	5.93	Homo sapiens	2	0	3	0	0	0	0	0	0	0	0	0	0	0	0	0.0540541	0	0.0810811	0	0	0	0	0	0	0	0	0	0	0	0	0.000592147	0	0.00107328	0	0	0	0	0	0	0	0	0	0	0
227	Phospholipid transfer protein OS=Homo sapiens GN=PLTP PE=1 SV=1	PLTP_HUMAN	55	7.01	Homo sapiens	0	0	0	0	0	0	0	0	0	2	2	2	2	3	3	0	0	0	0	0	0	0	0	0	0.0363636	0.0363636	0.0363636	0.0363636	0.0545455	0.0545455	0	0	0	0	0	0	0	0	0	0.000405644	0.000371154	0.000357727	0.000366596	0.000555176
228	Integrin beta-2 OS=Homo sapiens GN=ITGB2 PE=1 SV=2	ITB2_HUMAN	85	6.94	Homo sapiens	0	0	0	0	0	0	0	0	0	0	0	0	0	0	0	0	0	0	0	0	0	0	0	0	0	0	0	0	0	0	0	0	0	0	0	0	0	0	0	0	0	0	0	0
229	Titin OS=Homo sapiens GN=TTN PE=1 SV=4	TITIN_HUMAN	381	6.02	Homo sapiens	0	0	0	0	0	0	0	0	0	0	0	0	0	0	0	0	0	0	0	0	0	0	0	0	0	0	0	0	0	0	0	0	0	0	0	0	0	0	0	0	0	0	0	0
230	Cathelicidin antimicrobial peptide OS=Homo sapiens GN=CAMP PE=1 SV=1	CAMP_HUMAN	19	10.03	Homo sapiens	0	0	0	0	0	0	0	0	0	3	2	2	2	3	3	0	0	0	0	0	0	0	0	0	0.157895	0.105263	0.105263	0.105263	0.157895	0.157895	0	0	0	0	0	0	0	0	0	0.00176135	0.00107439	0.00103553	0.0010612	0.00160709
231	Angiopoietin-related protein 6 OS=Homo sapiens GN=ANGPTL6 PE=1 SV=1	ANGL6_HUMAN	52	8.64	Homo sapiens	0	3	0	4	3	8	2	0	3	0	0	0	0	0	0	0	0.0576923	0	0.0769231	0.0576923	0.153846	0.0384615	0	0.0576923	0	0	0	0	0	0	0	0.000767447	0	0.000911264	0.000834045	0.0018238	0.000405523	0	0.000571964	0	0	0	0	0
232	Keratin, type I cytoskeletal 13 OS=Homo sapiens GN=KRT13 PE=1 SV=4	K1C13_HUMAN	50	4.61	Homo sapiens	0	0	0	0	0	0	0	0	0	0	0	0	0	0	0	0	0	0	0	0	0	0	0	0	0	0	0	0	0	0	0	0	0	0	0	0	0	0	0	0	0	0	0	0
233	Platelet glycoprotein Ib beta chain OS=Homo sapiens GN=GP1BB PE=1 SV=1	GP1BB_HUMAN	22	9.37	Homo sapiens	3	2	0	0	0	0	3	2	2	0	0	0	0	0	0	0.136364	0.0909091	0	0	0	0	0.136364	0.0909091	0.0909091	0	0	0	0	0	0	0.00149383	0.00120931	0	0	0	0	0.00143776	0.000879231	0.000901277	0	0	0	0	0
234	Beta-parvin OS=Homo sapiens GN=PARVB PE=1 SV=1	PARVB_HUMAN	42	6.72	Homo sapiens	0	0	3	0	0	0	0	2	2	0	0	0	0	0	0	0	0	0.0714286	0	0	0	0	0.047619	0.047619	0	0	0	0	0	0	0	0	0.00094551	0	0	0	0	0.00046055	0.000472098	0	0	0	0	0
235	Transgelin-2 OS=Homo sapiens GN=TAGLN2 PE=1 SV=3	TAGL2_HUMAN	22	8.45	Homo sapiens	0	3	3	0	0	0	4	3	2	0	0	0	0	0	0	0	0.136364	0.136364	0	0	0	0.181818	0.136364	0.0909091	0	0	0	0	0	0	0	0.00181397	0.00180506	0	0	0	0.00191702	0.00131885	0.000901277	0	0	0	0	0
236	Transforming protein RhoA OS=Homo sapiens GN=RHOA PE=1 SV=1	RHOA_HUMAN	22	5.89	Homo sapiens	4	3	0	2	0	0	3	4	0	0	0	0	0	0	0	0.181818	0.136364	0	0.0909091	0	0	0.136364	0.181818	0	0	0	0	0	0	0	0.00199177	0.00181397	0	0.00107695	0	0	0.00143776	0.00175846	0	0	0	0	0	0
237	60 kDa heat shock protein, mitochondrial OS=Homo sapiens GN=HSPD1 PE=1 SV=2	CH60_HUMAN	61	5.55	Homo sapiens	2	5	7	0	0	0	4	4	5	0	0	0	0	0	0	0.0327869	0.0819672	0.114754	0	0	0	0.0655738	0.0655738	0.0819672	0	0	0	0	0	0	0.000359171	0.00109036	0.00151902	0	0	0	0.000691383	0.0006342	0.000812627	0	0	0	0	0
238	Ig lambda chain V-IV region Hil OS=Homo sapiens PE=1 SV=1	LV403_HUMAN	12	6.45	Homo sapiens	0	0	0	0	0	0	0	0	0	0	0	0	0	0	0	0	0	0	0	0	0	0	0	0	0	0	0	0	0	0	0	0	0	0	0	0	0	0	0	0	0	0	0	0
239	Carboxypeptidase B2 OS=Homo sapiens GN=CPB2 PE=1 SV=2	CBPB2_HUMAN	48	7.77	Homo sapiens	0	0	0	0	0	0	0	0	0	0	0	0	0	0	3	0	0	0	0	0	0	0	0	0	0	0	0	0	0	0.0625	0	0	0	0	0	0	0	0	0	0	0	0	0	0
240	Glutathione peroxidase 3 OS=Homo sapiens GN=GPX3 PE=1 SV=2	GPX3_HUMAN	26	8.29	Homo sapiens	0	0	0	0	0	0	0	0	0	0	2	2	2	2	3	0	0	0	0	0	0	0	0	0	0	0.0769231	0.0769231	0.0769231	0.0769231	0.115385	0	0	0	0	0	0	0	0	0	0	0.000785133	0.00075673	0.000775491	0.00078294
241	Protein disulfide-isomerase A3 OS=Homo sapiens GN=PDIA3 PE=1 SV=4	PDIA3_HUMAN	57	6.28	Homo sapiens	0	3	2	0	0	0	2	2	2	0	0	0	0	0	0	0	0.0526316	0.0350877	0	0	0	0.0350877	0.0350877	0.0350877	0	0	0	0	0	0	0	0.000700127	0.000464461	0	0	0	0.000369951	0.000339352	0.000347861	0	0	0	0	0
242	Proteoglycan 4 OS=Homo sapiens GN=PRG4 PE=1 SV=2	PRG4_HUMAN	151	10.16	Homo sapiens	0	0	0	0	0	0	0	0	0	0	0	0	0	2	0	0	0	0	0	0	0	0	0	0	0	0	0	0	0.013245	0	0	0	0	0	0	0	0	0	0	0	0	0	0	0.000134811
243	Moesin OS=Homo sapiens GN=MSN PE=1 SV=3	MOES_HUMAN	68	6.32	Homo sapiens	2	0	0	0	0	0	0	2	3	0	0	0	0	0	0	0.0294118	0	0	0	0	0	0	0.0294118	0.0441176	0	0	0	0	0	0	0.000322198	0	0	0	0	0	0	0.000284457	0.000437385	0	0	0	0	0
244	Complement C1q subcomponent subunit A OS=Homo sapiens GN=C1QA PE=1 SV=2	C1QA_HUMAN	26	9.45	Homo sapiens	0	0	0	0	0	0	0	0	0	0	0	0	0	0	0	0	0	0	0	0	0	0	0	0	0	0	0	0	0	0	0	0	0	0	0	0	0	0	0	0	0	0	0	0
245	Extracellular matrix protein 1 OS=Homo sapiens GN=ECM1 PE=1 SV=2	ECM1_HUMAN	61	6.7	Homo sapiens	0	0	0	0	0	0	0	0	0	0	0	0	0	0	0	0	0	0	0	0	0	0	0	0	0	0	0	0	0	0	0	0	0	0	0	0	0	0	0	0	0	0	0	0
246	Ig kappa chain V-III region VG (Fragment) OS=Homo sapiens PE=1 SV=1	KV309_HUMAN	13	4.59	Homo sapiens	0	2	2	0	0	0	0	0	0	0	0	0	0	0	0	0	0.153846	0.153846	0	0	0	0	0	0	0	0	0	0	0	0	0	0.00204652	0.00203648	0	0	0	0	0	0	0	0	0	0	0
247	Adenylyl cyclase-associated protein 1 OS=Homo sapiens GN=CAP1 PE=1 SV=5	CAP1_HUMAN	52	8.2	Homo sapiens	7	5	4	0	0	0	5	4	3	0	0	0	0	0	0	0.134615	0.0961538	0.0769231	0	0	0	0.0961538	0.0769231	0.0576923	0	0	0	0	0	0	0.00147467	0.00127908	0.00101824	0	0	0	0.00101381	0.000743965	0.000571964	0	0	0	0	0
248	Keratin, type II cytoskeletal 6B OS=Homo sapiens GN=KRT6B PE=1 SV=5	K2C6B_HUMAN	60	8.16	Homo sapiens	0	0	0	0	0	0	35	44	39	0	0	0	0	38	42	0	0	0	0	0	0	0.583333	0.733333	0.65	0	0	0	0	0.633333	0.7	0	0	0	0	0	0	0.00615043	0.00709247	0.00644413	0	0	0	0	0.00644621
249	CD9 antigen OS=Homo sapiens GN=CD9 PE=1 SV=4	CD9_HUMAN	25	7.19	Homo sapiens	0	0	0	0	0	0	0	0	0	0	0	0	0	0	0	0	0	0	0	0	0	0	0	0	0	0	0	0	0	0	0	0	0	0	0	0	0	0	0	0	0	0	0	0
250	Chromogranin-A OS=Homo sapiens GN=CHGA PE=1 SV=7	CMGA_HUMAN	51	4.27	Homo sapiens	0	0	0	0	0	0	0	0	0	0	0	0	0	0	0	0	0	0	0	0	0	0	0	0	0	0	0	0	0	0	0	0	0	0	0	0	0	0	0	0	0	0	0	0
251	Ig heavy chain V-III region BRO OS=Homo sapiens PE=1 SV=1	HV305_HUMAN	13	6.49	Homo sapiens	0	0	0	0	0	0	0	0	0	0	0	0	0	0	0	0	0	0	0	0	0	0	0	0	0	0	0	0	0	0	0	0	0	0	0	0	0	0	0	0	0	0	0	0
252	Coagulation factor VII OS=Homo sapiens GN=F7 PE=1 SV=1	FA7_HUMAN	52	7.23	Homo sapiens	2	2	0	3	3	4	4	0	2	0	0	0	0	0	0	0.0384615	0.0384615	0	0.0576923	0.0576923	0.0769231	0.0769231	0	0.0384615	0	0	0	0	0	0	0.000421336	0.000511631	0	0.000683448	0.000834045	0.0009119	0.000811045	0	0.00038131	0	0	0	0	0
253	Collectin-10 OS=Homo sapiens GN=COLEC10 PE=2 SV=2	COL10_HUMAN	31	7.39	Homo sapiens	4	0	4	4	6	6	4	6	4	2	2	2	2	3	2	0.129032	0	0.129032	0.129032	0.193548	0.193548	0.129032	0.193548	0.129032	0.0645161	0.0645161	0.0645161	0.0645161	0.0967742	0.0645161	0.00141351	0	0.00170802	0.00152857	0.00279809	0.00229446	0.00136046	0.00187191	0.00127923	0.00071969	0.000658499	0.000634677	0.000650412	0.000984989
254	Guanine nucleotide-binding protein G(i) subunit alpha-2 OS=Homo sapiens GN=GNAI2 PE=1 SV=3	GNAI2_HUMAN	40	5.2	Homo sapiens	0	0	0	0	0	0	0	0	0	0	0	0	0	0	0	0	0	0	0	0	0	0	0	0	0	0	0	0	0	0	0	0	0	0	0	0	0	0	0	0	0	0	0	0
255	Azurocidin OS=Homo sapiens GN=AZU1 PE=1 SV=3	CAP7_HUMAN	27	9.65	Homo sapiens	0	0	0	0	0	0	0	0	0	0	0	0	0	0	0	0	0	0	0	0	0	0	0	0	0	0	0	0	0	0	0	0	0	0	0	0	0	0	0	0	0	0	0	0
256	Pigment epithelium-derived factor OS=Homo sapiens GN=SERPINF1 PE=1 SV=4	PEDF_HUMAN	46	6.33	Homo sapiens	0	0	0	0	0	0	0	0	0	0	0	0	0	0	0	0	0	0	0	0	0	0	0	0	0	0	0	0	0	0	0	0	0	0	0	0	0	0	0	0	0	0	0	0
257	ATP synthase subunit alpha, mitochondrial OS=Homo sapiens GN=ATP5A1 PE=1 SV=1	ATPA_HUMAN	60	9.56	Homo sapiens	2	2	0	0	0	0	2	3	2	0	0	0	0	0	0	0.0333333	0.0333333	0	0	0	0	0.0333333	0.05	0.0333333	0	0	0	0	0	0	0.000365157	0.000443414	0	0	0	0	0.000351453	0.000483577	0.000330468	0	0	0	0	0
258	Keratin, type II cuticular Hb6 OS=Homo sapiens GN=KRT86 PE=1 SV=1	KRT86_HUMAN	53	5.35	Homo sapiens	0	0	0	0	0	0	0	0	0	0	0	0	0	0	0	0	0	0	0	0	0	0	0	0	0	0	0	0	0	0	0	0	0	0	0	0	0	0	0	0	0	0	0	0
259	Sarcoplasmic/endoplasmic reticulum calcium ATPase 3 OS=Homo sapiens GN=ATP2A3 PE=1 SV=2	AT2A3_HUMAN	114	5.26	Homo sapiens	0	2	3	0	0	0	0	2	0	0	0	0	0	0	0	0	0.0175439	0.0263158	0	0	0	0	0.0175439	0	0	0	0	0	0	0	0	0.000233376	0.000348346	0	0	0	0	0.000169676	0	0	0	0	0	0
260	Ig kappa chain V-II region RPMI 6410 OS=Homo sapiens PE=4 SV=1	KV206_HUMAN	15	9.53	Homo sapiens	0	0	0	0	0	0	0	0	0	0	0	0	0	0	0	0	0	0	0	0	0	0	0	0	0	0	0	0	0	0	0	0	0	0	0	0	0	0	0	0	0	0	0	0
261	Ig lambda chain V-I region WAH OS=Homo sapiens PE=1 SV=1	LV106_HUMAN	12	6.46	Homo sapiens	0	0	0	0	0	0	0	0	0	0	0	0	0	0	0	0	0	0	0	0	0	0	0	0	0	0	0	0	0	0	0	0	0	0	0	0	0	0	0	0	0	0	0	0
262	Tropomyosin alpha-3 chain OS=Homo sapiens GN=TPM3 PE=1 SV=2	TPM3_HUMAN	33	4.38	Homo sapiens	8	0	0	0	0	0	0	0	0	0	0	0	0	0	0	0.242424	0	0	0	0	0	0	0	0	0	0	0	0	0	0	0.00265569	0	0	0	0	0	0	0	0	0	0	0	0	0
263	Coagulation factor XII OS=Homo sapiens GN=F12 PE=1 SV=3	FA12_HUMAN	68	7.76	Homo sapiens	0	0	0	0	0	0	0	0	0	0	0	0	0	0	0	0	0	0	0	0	0	0	0	0	0	0	0	0	0	0	0	0	0	0	0	0	0	0	0	0	0	0	0	0
264	Calmodulin-like protein 5 OS=Homo sapiens GN=CALML5 PE=1 SV=2	CALL5_HUMAN	16	4.05	Homo sapiens	0	0	0	0	2	0	5	5	7	0	0	0	0	0	0	0	0	0	0	0.125	0	0.3125	0.3125	0.4375	0	0	0	0	0	0	0	0	0	0	0.0018071	0	0.00329487	0.00302236	0.0043374	0	0	0	0	0
265	Thymosin beta-4 OS=Homo sapiens GN=TMSB4X PE=1 SV=2	TYB4_HUMAN	5	4.72	Homo sapiens	3	2	0	0	0	0	0	0	0	0	0	0	0	0	0	0.6	0.4	0	0	0	0	0	0	0	0	0	0	0	0	0	0.00657283	0.00532096	0	0	0	0	0	0	0	0	0	0	0	0
266	Lysozyme C OS=Homo sapiens GN=LYZ PE=1 SV=1	LYSC_HUMAN	17	9.35	Homo sapiens	0	0	0	0	0	0	0	0	0	0	0	0	0	0	0	0	0	0	0	0	0	0	0	0	0	0	0	0	0	0	0	0	0	0	0	0	0	0	0	0	0	0	0	0
267	14-3-3 protein gamma OS=Homo sapiens GN=YWHAG PE=1 SV=2	1433G_HUMAN	28	4.52	Homo sapiens	0	0	0	3	3	3	0	5	5	0	0	0	0	0	0	0	0	0	0.107143	0.107143	0.107143	0	0.178571	0.178571	0	0	0	0	0	0	0	0	0	0.00126926	0.00154894	0.00127015	0	0.00172706	0.00177037	0	0	0	0	0
268	CD59 glycoprotein OS=Homo sapiens GN=CD59 PE=1 SV=1	CD59_HUMAN	14	6.47	Homo sapiens	0	0	0	0	0	0	0	0	0	0	0	0	0	0	0	0	0	0	0	0	0	0	0	0	0	0	0	0	0	0	0	0	0	0	0	0	0	0	0	0	0	0	0	0
269	Junction plakoglobin OS=Homo sapiens GN=JUP PE=1 SV=3	PLAK_HUMAN	82	6.05	Homo sapiens	0	0	0	0	0	0	5	4	5	0	0	0	0	2	0	0	0	0	0	0	0	0.0609756	0.0487805	0.0609756	0	0	0	0	0.0243902	0	0	0	0	0	0	0	0.000642902	0.000471783	0.000604515	0	0	0	0	0.000248249
270	Annexin A1 OS=Homo sapiens GN=ANXA1 PE=1 SV=2	ANXA1_HUMAN	39	7.04	Homo sapiens	0	0	0	0	0	0	4	4	4	0	0	0	0	0	0	0	0	0	0	0	0	0.102564	0.102564	0.102564	0	0	0	0	0	0	0	0	0	0	0	0	0.00108139	0.000991953	0.00101683	0	0	0	0	0
271	Guanine nucleotide-binding protein G(I)/G(S)/G(T) subunit beta-1 OS=Homo sapiens GN=GNB1 PE=1 SV=3	GBB1_HUMAN	37	5.85	Homo sapiens	2	0	0	0	0	0	3	4	2	0	0	0	0	0	0	0.0540541	0	0	0	0	0	0.0810811	0.108108	0.0540541	0	0	0	0	0	0	0.000592147	0	0	0	0	0	0.000854886	0.00104557	0.000535895	0	0	0	0	0
272	Filaggrin OS=Homo sapiens GN=FLG PE=1 SV=3	FILA_HUMAN	435	9.6	Homo sapiens	0	0	0	0	0	0	0	0	2	3	2	2	2	0	0	0	0	0	0	0	0	0	0	0.0045977	0.00689655	0.0045977	0.0045977	0.0045977	0	0	0	0	0	0	0	0	0	0	4.55818e-05	7.69324e-05	4.69275e-05	4.52298e-05	4.63512e-05	0
273	Aggrecan core protein OS=Homo sapiens GN=ACAN PE=1 SV=2	PGCA_HUMAN	250	3.82	Homo sapiens	0	0	0	0	2	2	0	0	0	0	0	0	0	0	0	0	0	0	0	0.008	0.008	0	0	0	0	0	0	0	0	0	0	0	0	0	0.000115654	9.48376e-05	0	0	0	0	0	0	0	0
274	Protein MENT OS=Homo sapiens GN=MENT PE=2 SV=1	MENT_HUMAN	37	8.67	Homo sapiens	0	0	0	0	0	0	0	0	0	0	0	0	0	0	0	0	0	0	0	0	0	0	0	0	0	0	0	0	0	0	0	0	0	0	0	0	0	0	0	0	0	0	0	0
275	Leucine-rich alpha-2-glycoprotein OS=Homo sapiens GN=LRG1 PE=1 SV=2	A2GL_HUMAN	38	6.95	Homo sapiens	0	0	0	0	0	0	0	0	0	0	0	0	0	0	0	0	0	0	0	0	0	0	0	0	0	0	0	0	0	0	0	0	0	0	0	0	0	0	0	0	0	0	0	0
276	14-3-3 protein eta OS=Homo sapiens GN=YWHAH PE=1 SV=4	1433F_HUMAN	28	4.47	Homo sapiens	0	0	0	0	0	0	0	0	0	0	0	0	0	0	0	0	0	0	0	0	0	0	0	0	0	0	0	0	0	0	0	0	0	0	0	0	0	0	0	0	0	0	0	0
277	HLA class I histocompatibility antigen, A-2 alpha chain OS=Homo sapiens GN=HLA-A PE=1 SV=1	1A02_HUMAN	41	7	Homo sapiens	0	0	0	0	0	0	0	5	4	0	0	0	0	0	0	0	0	0	0	0	0	0	0.121951	0.097561	0	0	0	0	0	0	0	0	0	0	0	0	0	0.00117946	0.000967224	0	0	0	0	0
278	Coronin-1C OS=Homo sapiens GN=CORO1C PE=1 SV=1	COR1C_HUMAN	53	7.09	Homo sapiens	2	3	0	0	0	0	0	0	0	0	0	0	0	0	0	0.0377358	0.0566038	0	0	0	0	0	0	0	0	0	0	0	0	0	0.000413386	0.000752967	0	0	0	0	0	0	0	0	0	0	0	0
279	PDZ and LIM domain protein 1 OS=Homo sapiens GN=PDLIM1 PE=1 SV=4	PDLI1_HUMAN	36	7.03	Homo sapiens	0	0	0	0	0	0	0	0	2	0	0	0	0	0	0	0	0	0	0	0	0	0	0	0.0555556	0	0	0	0	0	0	0	0	0	0	0	0	0	0	0.00055078	0	0	0	0	0
280	Calumenin OS=Homo sapiens GN=CALU PE=1 SV=2	CALU_HUMAN	37	4.23	Homo sapiens	0	0	0	0	0	0	0	0	0	0	0	0	0	0	0	0	0	0	0	0	0	0	0	0	0	0	0	0	0	0	0	0	0	0	0	0	0	0	0	0	0	0	0	0
281	Suprabasin OS=Homo sapiens GN=SBSN PE=1 SV=2	SBSN_HUMAN	61	7.01	Homo sapiens	0	0	0	0	2	2	2	2	2	0	0	0	0	0	0	0	0	0	0	0.0327869	0.0327869	0.0327869	0.0327869	0.0327869	0	0	0	0	0	0	0	0	0	0	0.000473993	0.000388679	0.000345691	0.0003171	0.000325051	0	0	0	0	0
282	Histone H3.3 OS=Homo sapiens GN=H3F3A PE=1 SV=2	H33_HUMAN	15	11.83	Homo sapiens	0	0	0	0	0	0	0	0	0	0	0	0	0	0	0	0	0	0	0	0	0	0	0	0	0	0	0	0	0	0	0	0	0	0	0	0	0	0	0	0	0	0	0	0
283	Platelet glycoprotein 4 OS=Homo sapiens GN=CD36 PE=1 SV=2	CD36_HUMAN	53	8.06	Homo sapiens	5	0	2	0	0	0	2	3	2	0	0	0	0	0	0	0.0943396	0	0.0377358	0	0	0	0.0377358	0.0566038	0.0377358	0	0	0	0	0	0	0.00103346	0	0.000499515	0	0	0	0.000397871	0.000547446	0.000374115	0	0	0	0	0
284	Chloride intracellular channel protein 1 OS=Homo sapiens GN=CLIC1 PE=1 SV=4	CLIC1_HUMAN	27	4.82	Homo sapiens	2	0	0	2	0	0	2	0	2	0	0	0	0	0	0	0.0740741	0	0	0.0740741	0	0	0.0740741	0	0.0740741	0	0	0	0	0	0	0.000811461	0	0	0.000877513	0	0	0.000781007	0	0.000734374	0	0	0	0	0
285	Alpha-actinin-4 OS=Homo sapiens GN=ACTN4 PE=1 SV=2	ACTN4_HUMAN	105	5.12	Homo sapiens	0	0	0	0	0	0	6	0	0	0	0	0	0	0	0	0	0	0	0	0	0	0.0571429	0	0	0	0	0	0	0	0	0	0	0	0	0	0	0.000602491	0	0	0	0	0	0	0
286	Transforming growth factor-beta-induced protein ig-h3 OS=Homo sapiens GN=TGFBI PE=1 SV=1	BGH3_HUMAN	75	7.77	Homo sapiens	0	0	0	0	0	0	0	0	0	0	0	0	0	0	0	0	0	0	0	0	0	0	0	0	0	0	0	0	0	0	0	0	0	0	0	0	0	0	0	0	0	0	0	0
287	Complement factor H-related protein 4 OS=Homo sapiens GN=CFHR4 PE=1 SV=3	FHR4_HUMAN	65	4.58	Homo sapiens	0	0	0	0	0	0	0	0	0	0	0	0	0	0	0	0	0	0	0	0	0	0	0	0	0	0	0	0	0	0	0	0	0	0	0	0	0	0	0	0	0	0	0	0
288	Kallistatin OS=Homo sapiens GN=SERPINA4 PE=1 SV=3	KAIN_HUMAN	49	7.85	Homo sapiens	0	0	0	0	0	0	0	0	0	0	0	0	0	2	2	0	0	0	0	0	0	0	0	0	0	0	0	0	0.0408163	0.0408163	0	0	0	0	0	0	0	0	0	0	0	0	0	0.000415438
289	Monocyte differentiation antigen CD14 OS=Homo sapiens GN=CD14 PE=1 SV=2	CD14_HUMAN	40	6.16	Homo sapiens	0	0	0	0	0	0	0	0	0	0	0	0	0	0	0	0	0	0	0	0	0	0	0	0	0	0	0	0	0	0	0	0	0	0	0	0	0	0	0	0	0	0	0	0
290	Prenylcysteine oxidase 1 OS=Homo sapiens GN=PCYOX1 PE=1 SV=3	PCYOX_HUMAN	57	6.1	Homo sapiens	0	0	0	0	0	0	0	0	0	2	2	0	0	3	2	0	0	0	0	0	0	0	0	0	0.0350877	0.0350877	0	0	0.0526316	0.0350877	0	0	0	0	0	0	0	0	0	0.000391411	0.000358131	0	0	0.000535696
291	F-actin-capping protein subunit beta OS=Homo sapiens GN=CAPZB PE=1 SV=4	CAPZB_HUMAN	31	5.23	Homo sapiens	0	2	0	0	0	0	0	0	0	0	0	0	0	0	0	0	0.0645161	0	0	0	0	0	0	0	0	0	0	0	0	0	0	0.00085822	0	0	0	0	0	0	0	0	0	0	0	0
292	Hemoglobin subunit delta OS=Homo sapiens GN=HBD PE=1 SV=2	HBD_HUMAN	16	8.26	Homo sapiens	0	0	0	30	23	26	0	0	0	0	0	0	0	0	0	0	0	0	1.875	1.4375	1.625	0	0	0	0	0	0	0	0	0	0	0	0	0.0222121	0.0207816	0.0192639	0	0	0	0	0	0	0	0
293	Desmoglein-1 OS=Homo sapiens GN=DSG1 PE=1 SV=2	DSG1_HUMAN	114	4.66	Homo sapiens	0	0	0	0	0	0	0	0	0	0	0	0	0	0	0	0	0	0	0	0	0	0	0	0	0	0	0	0	0	0	0	0	0	0	0	0	0	0	0	0	0	0	0	0
294	Myosin regulatory light polypeptide 9 OS=Homo sapiens GN=MYL9 PE=1 SV=4	MYL9_HUMAN	20	4.54	Homo sapiens	0	0	0	0	0	0	0	0	0	0	0	0	0	0	0	0	0	0	0	0	0	0	0	0	0	0	0	0	0	0	0	0	0	0	0	0	0	0	0	0	0	0	0	0
295	Cytochrome b-245 heavy chain OS=Homo sapiens GN=CYBB PE=1 SV=2	CY24B_HUMAN	65	8.76	Homo sapiens	0	0	0	0	0	0	0	0	0	0	0	0	0	0	0	0	0	0	0	0	0	0	0	0	0	0	0	0	0	0	0	0	0	0	0	0	0	0	0	0	0	0	0	0
296	Transitional endoplasmic reticulum ATPase OS=Homo sapiens GN=VCP PE=1 SV=4	TERA_HUMAN	89	4.89	Homo sapiens	0	0	0	0	0	0	0	0	0	0	0	0	0	0	0	0	0	0	0	0	0	0	0	0	0	0	0	0	0	0	0	0	0	0	0	0	0	0	0	0	0	0	0	0
297	Eosinophil peroxidase OS=Homo sapiens GN=EPX PE=1 SV=2	PERE_HUMAN	81	10.81	Homo sapiens	0	0	0	0	0	0	0	0	0	0	0	0	0	0	0	0	0	0	0	0	0	0	0	0	0	0	0	0	0	0	0	0	0	0	0	0	0	0	0	0	0	0	0	0
298	Zinc-alpha-2-glycoprotein OS=Homo sapiens GN=AZGP1 PE=1 SV=2	ZA2G_HUMAN	34	5.92	Homo sapiens	0	0	0	0	0	0	0	2	0	0	0	2	0	0	0	0	0	0	0	0	0	0	0.0588235	0	0	0	0.0588235	0	0	0	0	0	0	0	0	0	0	0.000568914	0	0	0	0.000578676	0	0
299	Solute carrier family 2, facilitated glucose transporter member 3 OS=Homo sapiens GN=SLC2A3 PE=2 SV=1	GTR3_HUMAN	54	7.24	Homo sapiens	0	0	0	0	0	0	0	0	0	0	0	0	0	0	0	0	0	0	0	0	0	0	0	0	0	0	0	0	0	0	0	0	0	0	0	0	0	0	0	0	0	0	0	0
300	Myosin regulatory light chain 12A OS=Homo sapiens GN=MYL12A PE=1 SV=2	ML12A_HUMAN	20	4.4	Homo sapiens	2	0	0	0	0	0	2	2	3	0	0	0	0	0	0	0.1	0	0	0	0	0	0.1	0.1	0.15	0	0	0	0	0	0	0.00109547	0	0	0	0	0	0.00105436	0.000967155	0.00148711	0	0	0	0	0
301	Pentraxin-related protein PTX3 OS=Homo sapiens GN=PTX3 PE=1 SV=3	PTX3_HUMAN	42	4.67	Homo sapiens	0	0	0	0	0	0	0	0	0	0	0	0	0	0	0	0	0	0	0	0	0	0	0	0	0	0	0	0	0	0	0	0	0	0	0	0	0	0	0	0	0	0	0	0
302	Reelin OS=Homo sapiens GN=RELN PE=1 SV=3	RELN_HUMAN	388	5.74	Homo sapiens	0	0	0	0	0	0	0	0	0	0	0	0	0	0	0	0	0	0	0	0	0	0	0	0	0	0	0	0	0	0	0	0	0	0	0	0	0	0	0	0	0	0	0	0
303	Dickkopf-related protein 3 OS=Homo sapiens GN=DKK3 PE=1 SV=2	DKK3_HUMAN	38	4.3	Homo sapiens	0	0	0	0	0	0	2	0	0	0	0	0	0	0	0	0	0	0	0	0	0	0.0526316	0	0	0	0	0	0	0	0	0	0	0	0	0	0	0.000554926	0	0	0	0	0	0	0
304	HLA class I histocompatibility antigen, B-15 alpha chain OS=Homo sapiens GN=HLA-B PE=1 SV=2	1B15_HUMAN	40	6.25	Homo sapiens	0	0	0	0	0	0	0	0	0	0	0	0	0	0	0	0	0	0	0	0	0	0	0	0	0	0	0	0	0	0	0	0	0	0	0	0	0	0	0	0	0	0	0	0
305	Basement membrane-specific heparan sulfate proteoglycan core protein OS=Homo sapiens GN=HSPG2 PE=1 SV=4	PGBM_HUMAN	469	6.49	Homo sapiens	0	0	0	0	0	0	0	0	0	0	0	0	0	0	0	0	0	0	0	0	0	0	0	0	0	0	0	0	0	0	0	0	0	0	0	0	0	0	0	0	0	0	0	0
306	Complement C2 OS=Homo sapiens GN=C2 PE=1 SV=2	CO2_HUMAN	83	7.43	Homo sapiens	0	0	0	0	0	0	0	0	0	0	0	0	0	0	0	0	0	0	0	0	0	0	0	0	0	0	0	0	0	0	0	0	0	0	0	0	0	0	0	0	0	0	0	0
307	Tropomyosin alpha-1 chain OS=Homo sapiens GN=TPM1 PE=1 SV=2	TPM1_HUMAN	33	4.39	Homo sapiens	9	0	0	0	0	0	0	0	0	0	0	0	0	0	0	0.272727	0	0	0	0	0	0	0	0	0	0	0	0	0	0	0.00298765	0	0	0	0	0	0	0	0	0	0	0	0	0
308	Ficolin-2 OS=Homo sapiens GN=FCN2 PE=1 SV=2	FCN2_HUMAN	34	6.77	Homo sapiens	0	0	0	0	0	0	0	0	0	0	0	0	0	0	0	0	0	0	0	0	0	0	0	0	0	0	0	0	0	0	0	0	0	0	0	0	0	0	0	0	0	0	0	0
309	Bone marrow proteoglycan OS=Homo sapiens GN=PRG2 PE=1 SV=2	PRG2_HUMAN	25	6.75	Homo sapiens	0	0	0	0	0	0	0	0	0	0	0	0	0	0	0	0	0	0	0	0	0	0	0	0	0	0	0	0	0	0	0	0	0	0	0	0	0	0	0	0	0	0	0	0
310	Zyxin OS=Homo sapiens GN=ZYX PE=1 SV=1	ZYX_HUMAN	61	6.65	Homo sapiens	0	0	0	0	0	0	2	0	0	0	0	0	0	0	0	0	0	0	0	0	0	0.0327869	0	0	0	0	0	0	0	0	0	0	0	0	0	0	0.000345691	0	0	0	0	0	0	0
311	Protein disulfide-isomerase OS=Homo sapiens GN=P4HB PE=1 SV=3	PDIA1_HUMAN	57	4.49	Homo sapiens	0	0	0	0	0	0	0	0	0	0	0	0	0	0	0	0	0	0	0	0	0	0	0	0	0	0	0	0	0	0	0	0	0	0	0	0	0	0	0	0	0	0	0	0
312	Mannose-binding protein C OS=Homo sapiens GN=MBL2 PE=1 SV=2	MBL2_HUMAN	26	5.14	Homo sapiens	2	0	0	0	2	0	0	0	0	0	0	0	0	0	0	0.0769231	0	0	0	0.0769231	0	0	0	0	0	0	0	0	0	0	0.000842671	0	0	0	0.00111206	0	0	0	0	0	0	0	0	0
313	Carcinoembryonic antigen-related cell adhesion molecule 8 OS=Homo sapiens GN=CEACAM8 PE=1 SV=2	CEAM8_HUMAN	38	7.45	Homo sapiens	0	0	0	0	0	0	0	0	0	0	0	0	0	0	0	0	0	0	0	0	0	0	0	0	0	0	0	0	0	0	0	0	0	0	0	0	0	0	0	0	0	0	0	0
314	Tubulin beta chain OS=Homo sapiens GN=TUBB PE=1 SV=2	TBB5_HUMAN	50	4.52	Homo sapiens	16	15	0	0	0	0	16	15	20	0	0	0	0	0	0	0.32	0.3	0	0	0	0	0.32	0.3	0.4	0	0	0	0	0	0	0.00350551	0.00399072	0	0	0	0	0.00337395	0.00290146	0.00396562	0	0	0	0	0
315	Triosephosphate isomerase OS=Homo sapiens GN=TPI1 PE=1 SV=3	TPIS_HUMAN	31	5.72	Homo sapiens	0	0	0	0	0	0	4	3	3	0	0	0	0	0	0	0	0	0	0	0	0	0.129032	0.0967742	0.0967742	0	0	0	0	0	0	0	0	0	0	0	0	0.00136046	0.000935956	0.000959424	0	0	0	0	0
316	Keratin, type II cuticular Hb2 OS=Homo sapiens GN=KRT82 PE=3 SV=3	KRT82_HUMAN	57	6.72	Homo sapiens	0	0	0	0	0	0	0	0	0	0	0	0	0	0	0	0	0	0	0	0	0	0	0	0	0	0	0	0	0	0	0	0	0	0	0	0	0	0	0	0	0	0	0	0
317	Fatty acid-binding protein, epidermal OS=Homo sapiens GN=FABP5 PE=1 SV=3	FABP5_HUMAN	15	7.05	Homo sapiens	0	0	0	0	0	0	8	12	7	0	0	0	0	0	2	0	0	0	0	0	0	0.533333	0.8	0.466667	0	0	0	0	0	0.133333	0	0	0	0	0	0	0.00562325	0.00773724	0.00462656	0	0	0	0	0
318	Actin-related protein 3 OS=Homo sapiens GN=ACTR3 PE=1 SV=3	ARP3_HUMAN	47	5.69	Homo sapiens	0	0	0	0	0	0	0	0	0	0	0	0	0	0	0	0	0	0	0	0	0	0	0	0	0	0	0	0	0	0	0	0	0	0	0	0	0	0	0	0	0	0	0	0
319	Superoxide dismutase [Mn], mitochondrial OS=Homo sapiens GN=SOD2 PE=1 SV=2	SODM_HUMAN	25	8.45	Homo sapiens	2	0	2	0	0	0	2	2	0	0	0	0	0	0	0	0.08	0	0.08	0	0	0	0.08	0.08	0	0	0	0	0	0	0	0.000876378	0	0.00105897	0	0	0	0.000843487	0.000773724	0	0	0	0	0	0
320	Vasodilator-stimulated phosphoprotein OS=Homo sapiens GN=VASP PE=1 SV=3	VASP_HUMAN	40	9.41	Homo sapiens	2	0	0	0	0	0	0	0	0	0	0	0	0	0	0	0.05	0	0	0	0	0	0	0	0	0	0	0	0	0	0	0.000547736	0	0	0	0	0	0	0	0	0	0	0	0	0
321	Microtubule-associated protein RP/EB family member 2 OS=Homo sapiens GN=MAPRE2 PE=1 SV=1	MARE2_HUMAN	37	5.28	Homo sapiens	2	0	0	0	0	0	0	2	0	0	0	0	0	0	0	0.0540541	0	0	0	0	0	0	0.0540541	0	0	0	0	0	0	0	0.000592147	0	0	0	0	0	0	0.000522786	0	0	0	0	0	0
322	Ig heavy chain V-III region TUR OS=Homo sapiens PE=1 SV=1	HV318_HUMAN	12	10.12	Homo sapiens	0	0	0	0	0	0	0	0	0	0	0	0	0	0	0	0	0	0	0	0	0	0	0	0	0	0	0	0	0	0	0	0	0	0	0	0	0	0	0	0	0	0	0	0
323	Annexin A2 OS=Homo sapiens GN=ANXA2 PE=1 SV=2	ANXA2_HUMAN	39	7.91	Homo sapiens	0	0	0	0	0	0	14	9	11	0	0	0	0	0	0	0	0	0	0	0	0	0.358974	0.230769	0.282051	0	0	0	0	0	0	0	0	0	0	0	0	0.00378488	0.0022319	0.00279627	0	0	0	0	0
324	Ig lambda chain V-III region SH OS=Homo sapiens PE=1 SV=1	LV301_HUMAN	11	6.5	Homo sapiens	0	0	0	0	0	0	0	0	0	0	0	2	0	0	0	0	0	0	0	0	0	0	0	0	0	0	0.181818	0	0	0	0	0	0	0	0	0	0	0	0	0	0	0.00178863	0	0
325	Alpha-enolase OS=Homo sapiens GN=ENO1 PE=1 SV=2	ENOA_HUMAN	47	7.46	Homo sapiens	0	0	0	0	0	0	3	3	2	0	0	0	0	0	0	0	0	0	0	0	0	0.0638298	0.0638298	0.0425532	0	0	0	0	0	0	0	0	0	0	0	0	0.000672995	0.000617333	0.000421874	0	0	0	0	0
326	14-3-3 protein epsilon OS=Homo sapiens GN=YWHAE PE=1 SV=1	1433E_HUMAN	29	4.36	Homo sapiens	0	2	2	0	0	3	0	5	4	0	0	0	0	0	0	0	0.0689655	0.0689655	0	0	0.103448	0	0.172414	0.137931	0	0	0	0	0	0	0	0.000917408	0.000912906	0	0	0.00122635	0	0.00166751	0.00136746	0	0	0	0	0
327	Erythrocyte membrane protein band 4.2 OS=Homo sapiens GN=EPB42 PE=1 SV=3	EPB42_HUMAN	77	8.17	Homo sapiens	0	0	0	0	0	0	0	0	0	0	0	0	0	0	0	0	0	0	0	0	0	0	0	0	0	0	0	0	0	0	0	0	0	0	0	0	0	0	0	0	0	0	0	0
328	Ras-related protein Rab-10 OS=Homo sapiens GN=RAB10 PE=1 SV=1	RAB10_HUMAN	23	8.61	Homo sapiens	0	2	2	0	0	0	3	0	0	0	0	0	0	0	0	0	0.0869565	0.0869565	0	0	0	0.130435	0	0	0	0	0	0	0	0	0	0.00115673	0.00115106	0	0	0	0.00137525	0	0	0	0	0	0	0
329	Proteasome subunit alpha type-6 OS=Homo sapiens GN=PSMA6 PE=1 SV=1	PSA6_HUMAN	27	6.74	Homo sapiens	0	0	0	0	0	0	2	2	0	0	0	0	0	0	0	0	0	0	0	0	0	0.0740741	0.0740741	0	0	0	0	0	0	0	0	0	0	0	0	0	0.000781007	0.000716411	0	0	0	0	0	0
330	Versican core protein OS=Homo sapiens GN=VCAN PE=1 SV=3	CSPG2_HUMAN	373	4.15	Homo sapiens	0	0	0	0	0	0	0	0	0	0	0	0	0	0	0	0	0	0	0	0	0	0	0	0	0	0	0	0	0	0	0	0	0	0	0	0	0	0	0	0	0	0	0	0
331	EH domain-containing protein 3 OS=Homo sapiens GN=EHD3 PE=1 SV=2	EHD3_HUMAN	61	6.53	Homo sapiens	0	0	0	0	0	0	0	0	0	0	0	0	0	0	0	0	0	0	0	0	0	0	0	0	0	0	0	0	0	0	0	0	0	0	0	0	0	0	0	0	0	0	0	0
332	Serpin B3 OS=Homo sapiens GN=SERPINB3 PE=1 SV=2	SPB3_HUMAN	45	6.81	Homo sapiens	0	0	0	0	0	0	11	12	9	0	0	0	0	0	0	0	0	0	0	0	0	0.244444	0.266667	0.2	0	0	0	0	0	0	0	0	0	0	0	0	0.00257732	0.00257908	0.00198281	0	0	0	0	0
333	Annexin A3 OS=Homo sapiens GN=ANXA3 PE=1 SV=3	ANXA3_HUMAN	36	5.71	Homo sapiens	0	0	0	0	0	0	0	0	0	0	0	0	0	0	0	0	0	0	0	0	0	0	0	0	0	0	0	0	0	0	0	0	0	0	0	0	0	0	0	0	0	0	0	0
334	Tenascin OS=Homo sapiens GN=TNC PE=1 SV=3	TENA_HUMAN	241	4.52	Homo sapiens	0	0	0	0	0	0	0	0	0	0	0	0	0	0	0	0	0	0	0	0	0	0	0	0	0	0	0	0	0	0	0	0	0	0	0	0	0	0	0	0	0	0	0	0
335	Platelet endothelial cell adhesion molecule OS=Homo sapiens GN=PECAM1 PE=1 SV=1	PECA1_HUMAN	83	6.99	Homo sapiens	0	2	0	0	0	0	0	0	0	0	0	0	0	0	0	0	0.0240964	0	0	0	0	0	0	0	0	0	0	0	0	0	0	0.00032054	0	0	0	0	0	0	0	0	0	0	0	0
336	Collagen alpha-1(XVIII) chain OS=Homo sapiens GN=COL18A1 PE=1 SV=5	COIA1_HUMAN	178	5.89	Homo sapiens	0	0	0	0	0	0	0	0	0	0	2	0	0	0	0	0	0	0	0	0	0	0	0	0	0	0.011236	0	0	0	0	0	0	0	0	0	0	0	0	0	0	0.000114682	0	0	0
337	Biotinidase OS=Homo sapiens GN=BTD PE=1 SV=2	BTD_HUMAN	61	6.22	Homo sapiens	0	0	0	0	0	0	0	0	0	0	0	0	0	2	0	0	0	0	0	0	0	0	0	0	0	0	0	0	0.0327869	0	0	0	0	0	0	0	0	0	0	0	0	0	0	0.000333712
338	Angiopoietin-related protein 3 OS=Homo sapiens GN=ANGPTL3 PE=1 SV=1	ANGL3_HUMAN	54	6.68	Homo sapiens	0	0	0	2	0	0	0	0	0	0	0	0	0	0	0	0	0	0	0.037037	0	0	0	0	0	0	0	0	0	0	0	0	0	0	0.000438757	0	0	0	0	0	0	0	0	0	0
339	Ras suppressor protein 1 OS=Homo sapiens GN=RSU1 PE=1 SV=3	RSU1_HUMAN	32	9.16	Homo sapiens	0	0	0	0	0	0	0	0	0	0	0	0	0	0	0	0	0	0	0	0	0	0	0	0	0	0	0	0	0	0	0	0	0	0	0	0	0	0	0	0	0	0	0	0
340	Keratinocyte proline-rich protein OS=Homo sapiens GN=KPRP PE=1 SV=1	KPRP_HUMAN	64	8.29	Homo sapiens	0	0	0	0	0	0	0	0	2	0	0	0	0	0	0	0	0	0	0	0	0	0	0	0.03125	0	0	0	0	0	0	0	0	0	0	0	0	0	0	0.000309814	0	0	0	0	0
341	Proteasome subunit alpha type-1 OS=Homo sapiens GN=PSMA1 PE=1 SV=1	PSA1_HUMAN	30	6.6	Homo sapiens	2	0	0	0	0	0	0	0	0	0	0	0	0	0	0	0.0666667	0	0	0	0	0	0	0	0	0	0	0	0	0	0	0.000730315	0	0	0	0	0	0	0	0	0	0	0	0	0
342	Protein disulfide-isomerase A4 OS=Homo sapiens GN=PDIA4 PE=1 SV=2	PDIA4_HUMAN	73	4.7	Homo sapiens	0	3	0	3	0	0	0	0	0	0	0	0	0	0	0	0	0.0410959	0	0.0410959	0	0	0	0	0	0	0	0	0	0	0	0	0.000546674	0	0.00048684	0	0	0	0	0	0	0	0	0	0
343	Ig heavy chain V-II region ARH-77 OS=Homo sapiens PE=4 SV=1	HV209_HUMAN	16	8.45	Homo sapiens	0	0	0	0	0	0	0	0	0	0	2	0	0	0	3	0	0	0	0	0	0	0	0	0	0	0.125	0	0	0	0.1875	0	0	0	0	0	0	0	0	0	0	0.00127584	0	0	0
344	Malate dehydrogenase, mitochondrial OS=Homo sapiens GN=MDH2 PE=1 SV=3	MDHM_HUMAN	36	8.9	Homo sapiens	0	3	3	0	0	0	0	0	2	0	0	0	0	0	0	0	0.0833333	0.0833333	0	0	0	0	0	0.0555556	0	0	0	0	0	0	0	0.00110853	0.00110309	0	0	0	0	0	0.00055078	0	0	0	0	0
345	Peroxiredoxin-2 OS=Homo sapiens GN=PRDX2 PE=1 SV=5	PRDX2_HUMAN	22	5.76	Homo sapiens	0	0	0	0	3	3	0	0	0	0	0	0	0	0	0	0	0	0	0	0.136364	0.136364	0	0	0	0	0	0	0	0	0	0	0	0	0	0.00197138	0.00161655	0	0	0	0	0	0	0	0
346	Intelectin-1 OS=Homo sapiens GN=ITLN1 PE=1 SV=1	ITLN1_HUMAN	35	5.89	Homo sapiens	0	0	0	0	0	0	0	0	0	0	0	0	0	0	0	0	0	0	0	0	0	0	0	0	0	0	0	0	0	0	0	0	0	0	0	0	0	0	0	0	0	0	0	0
347	Keratin, type I cuticular Ha1 OS=Homo sapiens GN=KRT31 PE=1 SV=3	K1H1_HUMAN	47	4.53	Homo sapiens	0	0	0	0	0	0	0	0	0	0	0	0	0	0	0	0	0	0	0	0	0	0	0	0	0	0	0	0	0	0	0	0	0	0	0	0	0	0	0	0	0	0	0	0
348	Calponin-2 OS=Homo sapiens GN=CNN2 PE=1 SV=4	CNN2_HUMAN	34	7.38	Homo sapiens	0	0	0	0	0	0	0	0	0	0	0	0	0	0	0	0	0	0	0	0	0	0	0	0	0	0	0	0	0	0	0	0	0	0	0	0	0	0	0	0	0	0	0	0
349	IgGFc-binding protein OS=Homo sapiens GN=FCGBP PE=1 SV=3	FCGBP_HUMAN	572	4.99	Homo sapiens	0	0	0	0	0	0	0	0	0	0	0	0	0	0	0	0	0	0	0	0	0	0	0	0	0	0	0	0	0	0	0	0	0	0	0	0	0	0	0	0	0	0	0	0
350	Complement factor H-related protein 2 OS=Homo sapiens GN=CFHR2 PE=1 SV=1	FHR2_HUMAN	31	6.34	Homo sapiens	0	0	0	0	0	0	0	0	0	0	0	0	0	0	0	0	0	0	0	0	0	0	0	0	0	0	0	0	0	0	0	0	0	0	0	0	0	0	0	0	0	0	0	0
351	Ras-related C3 botulinum toxin substrate 1 OS=Homo sapiens GN=RAC1 PE=1 SV=1	RAC1_HUMAN	21	8.65	Homo sapiens	0	0	2	0	0	0	0	0	0	0	0	0	0	0	0	0	0	0.0952381	0	0	0	0	0	0	0	0	0	0	0	0	0	0	0.00126068	0	0	0	0	0	0	0	0	0	0	0
352	F-actin-capping protein subunit alpha-1 OS=Homo sapiens GN=CAPZA1 PE=1 SV=3	CAZA1_HUMAN	33	5.42	Homo sapiens	0	0	0	0	0	0	0	0	0	0	0	0	0	0	0	0	0	0	0	0	0	0	0	0	0	0	0	0	0	0	0	0	0	0	0	0	0	0	0	0	0	0	0	0
353	Tropomyosin beta chain OS=Homo sapiens GN=TPM2 PE=1 SV=1	TPM2_HUMAN	33	4.36	Homo sapiens	0	0	0	0	0	0	0	0	0	0	0	0	0	0	0	0	0	0	0	0	0	0	0	0	0	0	0	0	0	0	0	0	0	0	0	0	0	0	0	0	0	0	0	0
354	Ig lambda chain V region 4A OS=Homo sapiens PE=4 SV=1	LV001_HUMAN	12	7.12	Homo sapiens	0	0	0	0	0	0	0	0	0	0	0	0	0	0	0	0	0	0	0	0	0	0	0	0	0	0	0	0	0	0	0	0	0	0	0	0	0	0	0	0	0	0	0	0
355	Adipocyte plasma membrane-associated protein OS=Homo sapiens GN=APMAP PE=1 SV=2	APMAP_HUMAN	46	6.02	Homo sapiens	0	0	0	0	0	0	0	0	0	0	0	0	0	0	0	0	0	0	0	0	0	0	0	0	0	0	0	0	0	0	0	0	0	0	0	0	0	0	0	0	0	0	0	0
356	Serglycin OS=Homo sapiens GN=SRGN PE=1 SV=3	SRGN_HUMAN	18	4.57	Homo sapiens	0	0	0	0	0	0	0	0	0	0	0	0	0	0	0	0	0	0	0	0	0	0	0	0	0	0	0	0	0	0	0	0	0	0	0	0	0	0	0	0	0	0	0	0
357	T-complex protein 1 subunit gamma OS=Homo sapiens GN=CCT3 PE=1 SV=4	TCPG_HUMAN	61	6.44	Homo sapiens	0	0	0	0	0	0	0	0	0	0	0	0	0	0	0	0	0	0	0	0	0	0	0	0	0	0	0	0	0	0	0	0	0	0	0	0	0	0	0	0	0	0	0	0
358	Importin subunit beta-1 OS=Homo sapiens GN=KPNB1 PE=1 SV=2	IMB1_HUMAN	97	4.41	Homo sapiens	0	0	0	0	0	0	0	0	0	0	0	0	0	0	0	0	0	0	0	0	0	0	0	0	0	0	0	0	0	0	0	0	0	0	0	0	0	0	0	0	0	0	0	0
359	Phosphoglycerate kinase 1 OS=Homo sapiens GN=PGK1 PE=1 SV=3	PGK1_HUMAN	45	8.27	Homo sapiens	0	0	0	0	0	0	0	3	0	0	0	0	0	0	0	0	0	0	0	0	0	0	0.0666667	0	0	0	0	0	0	0	0	0	0	0	0	0	0	0.00064477	0	0	0	0	0	0
360	Macrophage receptor MARCO OS=Homo sapiens GN=MARCO PE=1 SV=1	MARCO_HUMAN	53	9.15	Homo sapiens	3	2	0	0	0	0	0	2	0	0	0	0	0	0	0	0.0566038	0.0377358	0	0	0	0	0	0.0377358	0	0	0	0	0	0	0	0.000620079	0.000501978	0	0	0	0	0	0.000364964	0	0	0	0	0	0
361	Desmocollin-1 OS=Homo sapiens GN=DSC1 PE=1 SV=2	DSC1_HUMAN	100	5.08	Homo sapiens	0	0	0	0	0	0	0	0	0	0	0	0	0	0	0	0	0	0	0	0	0	0	0	0	0	0	0	0	0	0	0	0	0	0	0	0	0	0	0	0	0	0	0	0
362	Coronin-1A OS=Homo sapiens GN=CORO1A PE=1 SV=4	COR1A_HUMAN	51	6.67	Homo sapiens	0	0	0	0	0	0	0	0	0	0	0	0	0	0	0	0	0	0	0	0	0	0	0	0	0	0	0	0	0	0	0	0	0	0	0	0	0	0	0	0	0	0	0	0
363	Small proline-rich protein 2E OS=Homo sapiens GN=SPRR2E PE=2 SV=2	SPR2E_HUMAN	8	8.38	Homo sapiens	0	0	0	0	0	0	4	7	8	0	0	0	0	0	0	0	0	0	0	0	0	0.5	0.875	1	0	0	0	0	0	0	0	0	0	0	0	0	0.0052718	0.0084626	0.00991405	0	0	0	0	0
364	Proteoglycan 3 OS=Homo sapiens GN=PRG3 PE=1 SV=2	PRG3_HUMAN	25	4.43	Homo sapiens	0	0	0	0	0	0	0	0	0	0	0	0	0	0	0	0	0	0	0	0	0	0	0	0	0	0	0	0	0	0	0	0	0	0	0	0	0	0	0	0	0	0	0	0
365	Peptidase inhibitor 16 OS=Homo sapiens GN=PI16 PE=1 SV=1	PI16_HUMAN	49	5.09	Homo sapiens	0	0	0	0	0	0	0	0	0	0	0	0	0	0	0	0	0	0	0	0	0	0	0	0	0	0	0	0	0	0	0	0	0	0	0	0	0	0	0	0	0	0	0	0
366	Ig kappa chain V-III region CLL OS=Homo sapiens PE=4 SV=2	KV308_HUMAN	14	8.7	Homo sapiens	0	0	0	0	0	0	0	0	0	0	0	0	0	0	0	0	0	0	0	0	0	0	0	0	0	0	0	0	0	0	0	0	0	0	0	0	0	0	0	0	0	0	0	0
367	Keratin, type II cytoskeletal 3 OS=Homo sapiens GN=KRT3 PE=1 SV=3	K2C3_HUMAN	64	6.41	Homo sapiens	0	0	0	0	0	0	0	0	0	0	0	0	0	0	0	0	0	0	0	0	0	0	0	0	0	0	0	0	0	0	0	0	0	0	0	0	0	0	0	0	0	0	0	0
368	ADP-ribosylation factor 1 OS=Homo sapiens GN=ARF1 PE=1 SV=2	ARF1_HUMAN	21	6.8	Homo sapiens	0	0	0	0	0	0	0	0	0	0	0	0	0	0	0	0	0	0	0	0	0	0	0	0	0	0	0	0	0	0	0	0	0	0	0	0	0	0	0	0	0	0	0	0
369	Beta-2-microglobulin OS=Homo sapiens GN=B2M PE=1 SV=1	B2MG_HUMAN	14	6.51	Homo sapiens	0	0	0	0	0	0	0	0	0	0	0	0	0	0	0	0	0	0	0	0	0	0	0	0	0	0	0	0	0	0	0	0	0	0	0	0	0	0	0	0	0	0	0	0
370	Tenascin-X OS=Homo sapiens GN=TNXB PE=1 SV=3	TENX_HUMAN	464	4.81	Homo sapiens	0	0	0	0	0	0	0	0	0	0	0	0	0	0	0	0	0	0	0	0	0	0	0	0	0	0	0	0	0	0	0	0	0	0	0	0	0	0	0	0	0	0	0	0
371	Actin-related protein 2 OS=Homo sapiens GN=ACTR2 PE=1 SV=1	ARP2_HUMAN	45	6.72	Homo sapiens	0	0	0	0	0	0	0	0	2	0	0	0	0	0	0	0	0	0	0	0	0	0	0	0.0444444	0	0	0	0	0	0	0	0	0	0	0	0	0	0	0.000440624	0	0	0	0	0
372	Calnexin OS=Homo sapiens GN=CANX PE=1 SV=2	CALX_HUMAN	68	4.21	Homo sapiens	0	0	0	0	0	0	0	0	0	0	0	0	0	0	0	0	0	0	0	0	0	0	0	0	0	0	0	0	0	0	0	0	0	0	0	0	0	0	0	0	0	0	0	0
373	ADP/ATP translocase 3 OS=Homo sapiens GN=SLC25A6 PE=1 SV=4	ADT3_HUMAN	33	10.26	Homo sapiens	0	0	0	0	0	0	0	0	0	0	0	0	0	0	0	0	0	0	0	0	0	0	0	0	0	0	0	0	0	0	0	0	0	0	0	0	0	0	0	0	0	0	0	0
374	Group XIIB secretory phospholipase A2-like protein OS=Homo sapiens GN=PLA2G12B PE=1 SV=2	PG12B_HUMAN	22	5.81	Homo sapiens	0	0	0	0	0	0	0	0	0	0	0	0	0	0	0	0	0	0	0	0	0	0	0	0	0	0	0	0	0	0	0	0	0	0	0	0	0	0	0	0	0	0	0	0
375	Cytochrome b-c1 complex subunit 2, mitochondrial OS=Homo sapiens GN=UQCRC2 PE=1 SV=3	QCR2_HUMAN	48	8.92	Homo sapiens	0	0	2	0	0	0	0	0	0	0	0	0	0	0	0	0	0	0.0416667	0	0	0	0	0	0	0	0	0	0	0	0	0	0	0.000551547	0	0	0	0	0	0	0	0	0	0	0
376	Ig heavy chain V-I region V35 OS=Homo sapiens PE=1 SV=1	HV103_HUMAN	13	9.87	Homo sapiens	0	0	0	0	0	0	0	0	0	0	0	0	0	0	0	0	0	0	0	0	0	0	0	0	0	0	0	0	0	0	0	0	0	0	0	0	0	0	0	0	0	0	0	0
377	Actin-related protein 2/3 complex subunit 1B OS=Homo sapiens GN=ARPC1B PE=1 SV=3	ARC1B_HUMAN	41	8.44	Homo sapiens	0	0	0	0	0	0	2	0	0	0	0	0	0	0	0	0	0	0	0	0	0	0.0487805	0	0	0	0	0	0	0	0	0	0	0	0	0	0	0.000514321	0	0	0	0	0	0	0
378	P-selectin OS=Homo sapiens GN=SELP PE=1 SV=3	LYAM3_HUMAN	91	6.57	Homo sapiens	0	0	2	0	0	0	0	3	0	0	0	0	0	0	0	0	0	0.021978	0	0	0	0	0.032967	0	0	0	0	0	0	0	0	0	0.000290926	0	0	0	0	0.000318842	0	0	0	0	0	0
379	Putative elongation factor 1-alpha-like 3 OS=Homo sapiens GN=EEF1A1P5 PE=5 SV=1	EF1A3_HUMAN	50	9.58	Homo sapiens	0	0	0	0	0	0	3	3	3	0	0	0	0	0	0	0	0	0	0	0	0	0.06	0.06	0.06	0	0	0	0	0	0	0	0	0	0	0	0	0.000632615	0.000580293	0.000594843	0	0	0	0	0
380	Carbonic anhydrase 1 OS=Homo sapiens GN=CA1 PE=1 SV=2	CAH1_HUMAN	29	7.14	Homo sapiens	0	0	0	5	6	7	0	0	0	0	0	0	0	0	0	0	0	0	0.172414	0.206897	0.241379	0	0	0	0	0	0	0	0	0	0	0	0	0.00204249	0.00299106	0.00286148	0	0	0	0	0	0	0	0
381	Actin-related protein 2/3 complex subunit 3 OS=Homo sapiens GN=ARPC3 PE=1 SV=3	ARPC3_HUMAN	21	8.83	Homo sapiens	0	0	0	0	0	0	0	0	0	0	0	0	0	0	0	0	0	0	0	0	0	0	0	0	0	0	0	0	0	0	0	0	0	0	0	0	0	0	0	0	0	0	0	0
382	Voltage-dependent anion-selective channel protein 3 OS=Homo sapiens GN=VDAC3 PE=1 SV=1	VDAC3_HUMAN	31	8.9	Homo sapiens	2	2	2	0	0	0	2	2	2	0	0	0	0	0	0	0.0645161	0.0645161	0.0645161	0	0	0	0.0645161	0.0645161	0.0645161	0	0	0	0	0	0	0.000706756	0.00085822	0.000854009	0	0	0	0.000680232	0.000623971	0.000639616	0	0	0	0	0
383	Protein S100-A12 OS=Homo sapiens GN=S100A12 PE=1 SV=2	S10AC_HUMAN	11	6.23	Homo sapiens	0	0	0	0	0	0	0	0	0	0	0	0	0	0	0	0	0	0	0	0	0	0	0	0	0	0	0	0	0	0	0	0	0	0	0	0	0	0	0	0	0	0	0	0
384	Actin-related protein 2/3 complex subunit 5 OS=Homo sapiens GN=ARPC5 PE=1 SV=3	ARPC5_HUMAN	16	5.3	Homo sapiens	0	0	0	0	0	0	0	0	0	0	0	0	0	0	0	0	0	0	0	0	0	0	0	0	0	0	0	0	0	0	0	0	0	0	0	0	0	0	0	0	0	0	0	0
385	Protocadherin-12 OS=Homo sapiens GN=PCDH12 PE=1 SV=1	PCD12_HUMAN	129	4.93	Homo sapiens	0	0	0	0	0	0	0	0	0	0	0	0	0	0	0	0	0	0	0	0	0	0	0	0	0	0	0	0	0	0	0	0	0	0	0	0	0	0	0	0	0	0	0	0
386	Tetraspanin-14 OS=Homo sapiens GN=TSPAN14 PE=1 SV=1	TSN14_HUMAN	31	6.84	Homo sapiens	0	0	0	0	0	0	0	0	0	0	0	0	0	0	0	0	0	0	0	0	0	0	0	0	0	0	0	0	0	0	0	0	0	0	0	0	0	0	0	0	0	0	0	0
387	Heat shock protein beta-1 OS=Homo sapiens GN=HSPB1 PE=1 SV=2	HSPB1_HUMAN	23	6.36	Homo sapiens	0	0	0	0	0	0	3	5	2	0	0	0	0	0	0	0	0	0	0	0	0	0.130435	0.217391	0.0869565	0	0	0	0	0	0	0	0	0	0	0	0	0.00137525	0.00210251	0.000862091	0	0	0	0	0
388	Ras-related protein Rab-1B OS=Homo sapiens GN=RAB1B PE=1 SV=1	RAB1B_HUMAN	22	5.38	Homo sapiens	0	0	0	0	0	0	2	0	0	0	0	0	0	0	0	0	0	0	0	0	0	0.0909091	0	0	0	0	0	0	0	0	0	0	0	0	0	0	0.000958508	0	0	0	0	0	0	0
389	Disintegrin and metalloproteinase domain-containing protein 10 OS=Homo sapiens GN=ADAM10 PE=1 SV=1	ADA10_HUMAN	84	7.81	Homo sapiens	0	0	0	0	0	0	0	0	0	0	0	0	0	0	0	0	0	0	0	0	0	0	0	0	0	0	0	0	0	0	0	0	0	0	0	0	0	0	0	0	0	0	0	0
390	C-C motif chemokine 5 OS=Homo sapiens GN=CCL5 PE=1 SV=3	CCL5_HUMAN	10	9.29	Homo sapiens	2	0	2	0	0	0	0	0	0	0	0	0	0	0	0	0.2	0	0.2	0	0	0	0	0	0	0	0	0	0	0	0	0.00219094	0	0.00264743	0	0	0	0	0	0	0	0	0	0	0
391	Hepatocyte growth factor activator OS=Homo sapiens GN=HGFAC PE=1 SV=1	HGFA_HUMAN	71	7.24	Homo sapiens	0	0	0	0	0	0	0	0	0	0	0	0	0	0	0	0	0	0	0	0	0	0	0	0	0	0	0	0	0	0	0	0	0	0	0	0	0	0	0	0	0	0	0	0
392	L-lactate dehydrogenase A chain OS=Homo sapiens GN=LDHA PE=1 SV=2	LDHA_HUMAN	37	8.45	Homo sapiens	0	0	0	0	0	0	0	3	4	0	0	0	0	0	0	0	0	0	0	0	0	0	0.0810811	0.108108	0	0	0	0	0	0	0	0	0	0	0	0	0	0.000784179	0.00107179	0	0	0	0	0
393	Soluble scavenger receptor cysteine-rich domain-containing protein SSC5D OS=Homo sapiens GN=SSC5D PE=1 SV=3	SRCRL_HUMAN	166	6.06	Homo sapiens	0	0	0	0	0	0	0	0	0	0	0	0	0	0	0	0	0	0	0	0	0	0	0	0	0	0	0	0	0	0	0	0	0	0	0	0	0	0	0	0	0	0	0	0
394	Receptor-type tyrosine-protein phosphatase C OS=Homo sapiens GN=PTPRC PE=1 SV=2	PTPRC_HUMAN	147	6.08	Homo sapiens	0	0	0	0	0	0	0	0	0	0	0	0	0	0	0	0	0	0	0	0	0	0	0	0	0	0	0	0	0	0	0	0	0	0	0	0	0	0	0	0	0	0	0	0
395	Thioredoxin OS=Homo sapiens GN=TXN PE=1 SV=3	THIO_HUMAN	12	4.55	Homo sapiens	0	0	0	0	0	0	0	0	0	0	0	0	0	0	0	0	0	0	0	0	0	0	0	0	0	0	0	0	0	0	0	0	0	0	0	0	0	0	0	0	0	0	0	0
396	Angiogenin OS=Homo sapiens GN=ANG PE=1 SV=1	ANGI_HUMAN	17	10.09	Homo sapiens	0	0	0	0	0	0	0	0	0	0	0	0	0	0	0	0	0	0	0	0	0	0	0	0	0	0	0	0	0	0	0	0	0	0	0	0	0	0	0	0	0	0	0	0
397	Ig delta chain C region OS=Homo sapiens GN=IGHD PE=1 SV=2	IGHD_HUMAN	42	8.02	Homo sapiens	0	0	0	0	0	0	0	0	0	0	0	0	0	0	0	0	0	0	0	0	0	0	0	0	0	0	0	0	0	0	0	0	0	0	0	0	0	0	0	0	0	0	0	0
398	Calpain small subunit 1 OS=Homo sapiens GN=CAPNS1 PE=1 SV=1	CPNS1_HUMAN	28	4.82	Homo sapiens	0	0	0	0	0	0	0	0	0	0	0	0	0	0	0	0	0	0	0	0	0	0	0	0	0	0	0	0	0	0	0	0	0	0	0	0	0	0	0	0	0	0	0	0
399	SH3 domain-binding glutamic acid-rich-like protein 3 OS=Homo sapiens GN=SH3BGRL3 PE=1 SV=1	SH3L3_HUMAN	10	4.56	Homo sapiens	0	0	0	0	0	0	0	0	0	0	0	0	0	0	0	0	0	0	0	0	0	0	0	0	0	0	0	0	0	0	0	0	0	0	0	0	0	0	0	0	0	0	0	0
400	Neural cell adhesion molecule 1 OS=Homo sapiens GN=NCAM1 PE=1 SV=3	NCAM1_HUMAN	95	4.51	Homo sapiens	0	0	0	0	0	0	0	0	0	0	0	0	0	0	0	0	0	0	0	0	0	0	0	0	0	0	0	0	0	0	0	0	0	0	0	0	0	0	0	0	0	0	0	0
401	EGF-containing fibulin-like extracellular matrix protein 1 OS=Homo sapiens GN=EFEMP1 PE=1 SV=2	FBLN3_HUMAN	55	4.7	Homo sapiens	0	0	0	0	0	0	0	0	0	0	0	0	0	0	0	0	0	0	0	0	0	0	0	0	0	0	0	0	0	0	0	0	0	0	0	0	0	0	0	0	0	0	0	0
402	Caldesmon OS=Homo sapiens GN=CALD1 PE=1 SV=3	CALD1_HUMAN	93	5.35	Homo sapiens	0	0	0	0	0	0	0	0	0	0	0	0	0	0	0	0	0	0	0	0	0	0	0	0	0	0	0	0	0	0	0	0	0	0	0	0	0	0	0	0	0	0	0	0
403	Catalase OS=Homo sapiens GN=CAT PE=1 SV=3	CATA_HUMAN	60	7.41	Homo sapiens	0	0	0	0	0	0	0	0	0	0	0	0	0	0	0	0	0	0	0	0	0	0	0	0	0	0	0	0	0	0	0	0	0	0	0	0	0	0	0	0	0	0	0	0
404	CD99 antigen OS=Homo sapiens GN=CD99 PE=1 SV=1	CD99_HUMAN	19	4.34	Homo sapiens	0	0	0	0	0	0	0	0	0	0	0	0	0	0	0	0	0	0	0	0	0	0	0	0	0	0	0	0	0	0	0	0	0	0	0	0	0	0	0	0	0	0	0	0
405	Heat shock 70 kDa protein 1A/1B OS=Homo sapiens GN=HSPA1A PE=1 SV=5	HSP71_HUMAN	70	5.47	Homo sapiens	0	0	0	0	0	0	4	0	0	0	0	0	0	0	0	0	0	0	0	0	0	0.0571429	0	0	0	0	0	0	0	0	0	0	0	0	0	0	0.000602491	0	0	0	0	0	0	0
406	ADAMTS-like protein 2 OS=Homo sapiens GN=ADAMTSL2 PE=1 SV=1	ATL2_HUMAN	105	6.38	Homo sapiens	0	0	0	0	0	0	0	0	0	0	0	0	0	0	0	0	0	0	0	0	0	0	0	0	0	0	0	0	0	0	0	0	0	0	0	0	0	0	0	0	0	0	0	0
407	Ig lambda-7 chain C region OS=Homo sapiens GN=IGLC7 PE=4 SV=2	LAC7_HUMAN	11	8.48	Homo sapiens	0	0	0	0	0	0	0	0	0	0	0	0	0	0	0	0	0	0	0	0	0	0	0	0	0	0	0	0	0	0	0	0	0	0	0	0	0	0	0	0	0	0	0	0
408	Glutathione peroxidase 1 OS=Homo sapiens GN=GPX1 PE=1 SV=4	GPX1_HUMAN	22	6.51	Homo sapiens	0	0	0	0	0	0	0	0	0	0	0	0	0	0	0	0	0	0	0	0	0	0	0	0	0	0	0	0	0	0	0	0	0	0	0	0	0	0	0	0	0	0	0	0
409	Platelet glycoprotein V OS=Homo sapiens GN=GP5 PE=1 SV=1	GPV_HUMAN	61	10.24	Homo sapiens	0	0	0	0	0	0	0	0	0	0	0	0	0	0	0	0	0	0	0	0	0	0	0	0	0	0	0	0	0	0	0	0	0	0	0	0	0	0	0	0	0	0	0	0
410	ATP synthase subunit O, mitochondrial OS=Homo sapiens GN=ATP5O PE=1 SV=1	ATPO_HUMAN	23	10.61	Homo sapiens	0	0	0	0	0	0	0	0	0	0	0	0	0	0	0	0	0	0	0	0	0	0	0	0	0	0	0	0	0	0	0	0	0	0	0	0	0	0	0	0	0	0	0	0
411	Calpain-1 catalytic subunit OS=Homo sapiens GN=CAPN1 PE=1 SV=1	CAN1_HUMAN	82	5.35	Homo sapiens	0	0	0	0	0	0	0	0	0	0	0	0	0	0	0	0	0	0	0	0	0	0	0	0	0	0	0	0	0	0	0	0	0	0	0	0	0	0	0	0	0	0	0	0
412	Protein unc-13 homolog D OS=Homo sapiens GN=UNC13D PE=1 SV=1	UN13D_HUMAN	123	6.64	Homo sapiens	2	0	0	0	0	0	0	0	0	0	0	0	0	0	0	0.0162602	0	0	0	0	0	0	0	0	0	0	0	0	0	0	0.000178126	0	0	0	0	0	0	0	0	0	0	0	0	0
413	Fibulin-5 OS=Homo sapiens GN=FBLN5 PE=1 SV=1	FBLN5_HUMAN	50	4.33	Homo sapiens	0	0	0	0	0	0	0	0	0	0	0	0	0	0	0	0	0	0	0	0	0	0	0	0	0	0	0	0	0	0	0	0	0	0	0	0	0	0	0	0	0	0	0	0
414	Olfactomedin-4 OS=Homo sapiens GN=OLFM4 PE=1 SV=1	OLFM4_HUMAN	57	5.37	Homo sapiens	0	0	0	0	0	0	0	0	0	0	0	0	0	0	0	0	0	0	0	0	0	0	0	0	0	0	0	0	0	0	0	0	0	0	0	0	0	0	0	0	0	0	0	0
415	Proteasome subunit beta type-6 OS=Homo sapiens GN=PSMB6 PE=1 SV=4	PSB6_HUMAN	25	4.54	Homo sapiens	0	0	0	0	0	0	0	0	0	0	0	0	0	0	0	0	0	0	0	0	0	0	0	0	0	0	0	0	0	0	0	0	0	0	0	0	0	0	0	0	0	0	0	0
416	Dynamin-1-like protein OS=Homo sapiens GN=DNM1L PE=1 SV=2	DNM1L_HUMAN	82	6.8	Homo sapiens	0	0	0	0	0	0	0	0	0	0	0	0	0	0	0	0	0	0	0	0	0	0	0	0	0	0	0	0	0	0	0	0	0	0	0	0	0	0	0	0	0	0	0	0
417	Macrophage migration inhibitory factor OS=Homo sapiens GN=MIF PE=1 SV=4	MIF_HUMAN	12	8.05	Homo sapiens	0	0	0	0	0	0	0	0	0	0	0	0	0	0	0	0	0	0	0	0	0	0	0	0	0	0	0	0	0	0	0	0	0	0	0	0	0	0	0	0	0	0	0	0
418	Neutral alpha-glucosidase AB OS=Homo sapiens GN=GANAB PE=1 SV=3	GANAB_HUMAN	107	6.06	Homo sapiens	0	0	0	0	0	0	0	0	0	0	0	0	0	0	0	0	0	0	0	0	0	0	0	0	0	0	0	0	0	0	0	0	0	0	0	0	0	0	0	0	0	0	0	0
419	Synaptosomal-associated protein 23 OS=Homo sapiens GN=SNAP23 PE=1 SV=1	SNP23_HUMAN	23	4.62	Homo sapiens	0	0	0	0	0	0	0	0	0	0	0	0	0	0	0	0	0	0	0	0	0	0	0	0	0	0	0	0	0	0	0	0	0	0	0	0	0	0	0	0	0	0	0	0
420	Neuropilin-1 OS=Homo sapiens GN=NRP1 PE=1 SV=3	NRP1_HUMAN	103	5.71	Homo sapiens	0	0	0	0	0	0	0	0	0	0	0	0	0	0	0	0	0	0	0	0	0	0	0	0	0	0	0	0	0	0	0	0	0	0	0	0	0	0	0	0	0	0	0	0
421	Protein G6b OS=Homo sapiens GN=G6B PE=1 SV=1	G6B_HUMAN	26	10.08	Homo sapiens	0	0	0	0	0	0	0	0	0	0	0	0	0	0	0	0	0	0	0	0	0	0	0	0	0	0	0	0	0	0	0	0	0	0	0	0	0	0	0	0	0	0	0	0
422	C-type lectin domain family 11 member A OS=Homo sapiens GN=CLEC11A PE=1 SV=1	CLC11_HUMAN	36	4.82	Homo sapiens	0	0	0	0	0	0	0	0	0	0	0	0	0	0	0	0	0	0	0	0	0	0	0	0	0	0	0	0	0	0	0	0	0	0	0	0	0	0	0	0	0	0	0	0
423	Sex hormone-binding globulin OS=Homo sapiens GN=SHBG PE=1 SV=2	SHBG_HUMAN	44	6.7	Homo sapiens	0	0	0	0	0	0	0	0	0	0	0	0	0	0	0	0	0	0	0	0	0	0	0	0	0	0	0	0	0	0	0	0	0	0	0	0	0	0	0	0	0	0	0	0
424	Plastin-2 OS=Homo sapiens GN=LCP1 PE=1 SV=6	PLSL_HUMAN	70	5.07	Homo sapiens	0	0	0	0	0	0	0	0	0	0	0	0	0	0	0	0	0	0	0	0	0	0	0	0	0	0	0	0	0	0	0	0	0	0	0	0	0	0	0	0	0	0	0	0
425	Plectin OS=Homo sapiens GN=PLEC PE=1 SV=3	PLEC_HUMAN	532	5.76	Homo sapiens	0	0	0	0	0	0	0	0	0	0	0	0	0	0	0	0	0	0	0	0	0	0	0	0	0	0	0	0	0	0	0	0	0	0	0	0	0	0	0	0	0	0	0	0
426	Endonuclease domain-containing 1 protein OS=Homo sapiens GN=ENDOD1 PE=1 SV=2	ENDD1_HUMAN	55	5.38	Homo sapiens	0	0	0	0	0	0	0	0	0	0	0	0	0	0	0	0	0	0	0	0	0	0	0	0	0	0	0	0	0	0	0	0	0	0	0	0	0	0	0	0	0	0	0	0
427	Carboxypeptidase Q OS=Homo sapiens GN=CPQ PE=1 SV=1	CBPQ_HUMAN	52	6.1	Homo sapiens	0	0	0	0	0	0	0	0	0	0	0	0	0	0	0	0	0	0	0	0	0	0	0	0	0	0	0	0	0	0	0	0	0	0	0	0	0	0	0	0	0	0	0	0
428	Transforming growth factor beta-1 OS=Homo sapiens GN=TGFB1 PE=1 SV=2	TGFB1_HUMAN	44	8.63	Homo sapiens	0	0	0	0	0	0	0	0	0	0	0	0	0	0	0	0	0	0	0	0	0	0	0	0	0	0	0	0	0	0	0	0	0	0	0	0	0	0	0	0	0	0	0	0
429	Caspase-14 OS=Homo sapiens GN=CASP14 PE=1 SV=2	CASPE_HUMAN	28	5.28	Homo sapiens	0	0	0	0	0	0	2	2	2	0	0	0	0	0	0	0	0	0	0	0	0	0.0714286	0.0714286	0.0714286	0	0	0	0	0	0	0	0	0	0	0	0	0.000753114	0.000690825	0.000708146	0	0	0	0	0
430	Protocadherin-18 OS=Homo sapiens GN=PCDH18 PE=2 SV=3	PCD18_HUMAN	126	4.78	Homo sapiens	2	3	0	0	0	2	0	0	0	0	0	0	0	0	0	0.015873	0.0238095	0	0	0	0.015873	0	0	0	0	0	0	0	0	0	0.000173885	0.000316724	0	0	0	0.00018817	0	0	0	0	0	0	0	0
431	Cadherin-related family member 2 OS=Homo sapiens GN=CDHR2 PE=1 SV=2	CDHR2_HUMAN	142	4.08	Homo sapiens	0	0	0	0	0	0	0	0	0	0	0	0	0	0	0	0	0	0	0	0	0	0	0	0	0	0	0	0	0	0	0	0	0	0	0	0	0	0	0	0	0	0	0	0
432	Resistin OS=Homo sapiens GN=RETN PE=2 SV=1	RETN_HUMAN	11	6.89	Homo sapiens	0	0	0	0	0	0	0	0	0	0	0	0	0	0	0	0	0	0	0	0	0	0	0	0	0	0	0	0	0	0	0	0	0	0	0	0	0	0	0	0	0	0	0	0
433	Tropomodulin-3 OS=Homo sapiens GN=TMOD3 PE=1 SV=1	TMOD3_HUMAN	40	4.83	Homo sapiens	0	0	0	0	0	0	0	2	0	0	0	0	0	0	0	0	0	0	0	0	0	0	0.05	0	0	0	0	0	0	0	0	0	0	0	0	0	0	0.000483577	0	0	0	0	0	0
434	Eukaryotic translation initiation factor 5A-1 OS=Homo sapiens GN=EIF5A PE=1 SV=2	IF5A1_HUMAN	17	4.86	Homo sapiens	0	0	0	0	0	0	0	0	0	0	0	0	0	0	0	0	0	0	0	0	0	0	0	0	0	0	0	0	0	0	0	0	0	0	0	0	0	0	0	0	0	0	0	0
435	Heparanase OS=Homo sapiens GN=HPSE PE=1 SV=2	HPSE_HUMAN	61	9.71	Homo sapiens	0	0	0	0	0	0	0	0	0	0	0	0	0	0	0	0	0	0	0	0	0	0	0	0	0	0	0	0	0	0	0	0	0	0	0	0	0	0	0	0	0	0	0	0
436	Hepatocyte growth factor-like protein OS=Homo sapiens GN=MST1 PE=1 SV=2	HGFL_HUMAN	80	7.71	Homo sapiens	0	0	0	0	0	0	0	0	0	0	0	0	0	0	0	0	0	0	0	0	0	0	0	0	0	0	0	0	0	0	0	0	0	0	0	0	0	0	0	0	0	0	0	0
437	Keratin, type II cytoskeletal 78 OS=Homo sapiens GN=KRT78 PE=2 SV=2	K2C78_HUMAN	57	5.83	Homo sapiens	0	0	0	0	0	0	0	0	0	0	0	0	0	0	0	0	0	0	0	0	0	0	0	0	0	0	0	0	0	0	0	0	0	0	0	0	0	0	0	0	0	0	0	0
438	Amyloid-like protein 2 OS=Homo sapiens GN=APLP2 PE=1 SV=2	APLP2_HUMAN	87	4.44	Homo sapiens	0	0	0	0	0	0	0	0	0	0	0	0	0	0	0	0	0	0	0	0	0	0	0	0	0	0	0	0	0	0	0	0	0	0	0	0	0	0	0	0	0	0	0	0
439	Prolactin-inducible protein OS=Homo sapiens GN=PIP PE=1 SV=1	PIP_HUMAN	17	8.18	Homo sapiens	0	0	0	0	0	0	0	0	0	0	0	0	0	0	0	0	0	0	0	0	0	0	0	0	0	0	0	0	0	0	0	0	0	0	0	0	0	0	0	0	0	0	0	0
440	Tight junction protein ZO-2 OS=Homo sapiens GN=TJP2 PE=1 SV=2	ZO2_HUMAN	134	7.43	Homo sapiens	0	0	0	0	0	0	0	0	0	0	0	0	0	0	0	0	0	0	0	0	0	0	0	0	0	0	0	0	0	0	0	0	0	0	0	0	0	0	0	0	0	0	0	0
441	EMILIN-1 OS=Homo sapiens GN=EMILIN1 PE=1 SV=2	EMIL1_HUMAN	107	4.81	Homo sapiens	0	2	0	0	0	0	0	0	0	0	0	0	0	0	0	0	0.0186916	0	0	0	0	0	0	0	0	0	0	0	0	0	0	0.000248643	0	0	0	0	0	0	0	0	0	0	0	0
442	Peroxiredoxin-1 OS=Homo sapiens GN=PRDX1 PE=1 SV=1	PRDX1_HUMAN	22	8.31	Homo sapiens	0	0	0	0	0	0	2	2	2	0	0	0	0	0	0	0	0	0	0	0	0	0.0909091	0.0909091	0.0909091	0	0	0	0	0	0	0	0	0	0	0	0	0.000958508	0.000879231	0.000901277	0	0	0	0	0
443	Keratin, type II cytoskeletal 4 OS=Homo sapiens GN=KRT4 PE=1 SV=4	K2C4_HUMAN	57	6.55	Homo sapiens	0	0	0	0	0	0	0	0	0	0	0	0	0	0	0	0	0	0	0	0	0	0	0	0	0	0	0	0	0	0	0	0	0	0	0	0	0	0	0	0	0	0	0	0
444	Cathepsin G OS=Homo sapiens GN=CTSG PE=1 SV=2	CATG_HUMAN	29	11.69	Homo sapiens	0	0	0	0	0	0	0	0	0	0	0	0	0	0	0	0	0	0	0	0	0	0	0	0	0	0	0	0	0	0	0	0	0	0	0	0	0	0	0	0	0	0	0	0
445	Proline-serine-threonine phosphatase-interacting protein 2 OS=Homo sapiens GN=PSTPIP2 PE=1 SV=4	PPIP2_HUMAN	39	8.68	Homo sapiens	0	0	0	0	0	0	0	0	0	0	0	0	0	0	0	0	0	0	0	0	0	0	0	0	0	0	0	0	0	0	0	0	0	0	0	0	0	0	0	0	0	0	0	0
446	Sulfhydryl oxidase 1 OS=Homo sapiens GN=QSOX1 PE=1 SV=3	QSOX1_HUMAN	83	9.18	Homo sapiens	0	0	0	0	0	0	0	0	0	0	0	0	0	0	0	0	0	0	0	0	0	0	0	0	0	0	0	0	0	0	0	0	0	0	0	0	0	0	0	0	0	0	0	0
447	CD226 antigen OS=Homo sapiens GN=CD226 PE=1 SV=2	CD226_HUMAN	39	8.04	Homo sapiens	0	0	0	0	0	0	0	0	0	0	0	0	0	0	0	0	0	0	0	0	0	0	0	0	0	0	0	0	0	0	0	0	0	0	0	0	0	0	0	0	0	0	0	0
448	Reticulon-4 OS=Homo sapiens GN=RTN4 PE=1 SV=2	RTN4_HUMAN	130	4.14	Homo sapiens	0	0	0	0	0	0	0	0	0	0	0	0	0	0	0	0	0	0	0	0	0	0	0	0	0	0	0	0	0	0	0	0	0	0	0	0	0	0	0	0	0	0	0	0
449	Protein Shroom3 OS=Homo sapiens GN=SHROOM3 PE=1 SV=2	SHRM3_HUMAN	217	7.85	Homo sapiens	0	0	0	0	0	0	0	0	0	0	0	0	0	0	0	0	0	0	0	0	0	0	0	0	0	0	0	0	0	0	0	0	0	0	0	0	0	0	0	0	0	0	0	0
450	Proteasome subunit alpha type-7 OS=Homo sapiens GN=PSMA7 PE=1 SV=1	PSA7_HUMAN	28	8.73	Homo sapiens	0	0	0	0	0	0	0	0	0	0	0	0	0	0	0	0	0	0	0	0	0	0	0	0	0	0	0	0	0	0	0	0	0	0	0	0	0	0	0	0	0	0	0	0
451	Nexilin OS=Homo sapiens GN=NEXN PE=1 SV=1	NEXN_HUMAN	81	4.99	Homo sapiens	0	0	0	0	0	0	0	0	0	0	0	0	0	0	0	0	0	0	0	0	0	0	0	0	0	0	0	0	0	0	0	0	0	0	0	0	0	0	0	0	0	0	0	0
452	Proto-oncogene tyrosine-protein kinase Src OS=Homo sapiens GN=SRC PE=1 SV=3	SRC_HUMAN	60	7.47	Homo sapiens	0	0	0	0	0	0	0	0	0	0	0	0	0	0	0	0	0	0	0	0	0	0	0	0	0	0	0	0	0	0	0	0	0	0	0	0	0	0	0	0	0	0	0	0
453	T-complex protein 1 subunit beta OS=Homo sapiens GN=CCT2 PE=1 SV=4	TCPB_HUMAN	57	6.42	Homo sapiens	0	0	0	0	0	0	0	0	0	0	0	0	0	0	0	0	0	0	0	0	0	0	0	0	0	0	0	0	0	0	0	0	0	0	0	0	0	0	0	0	0	0	0	0
454	Myosin light chain kinase, smooth muscle OS=Homo sapiens GN=MYLK PE=1 SV=4	MYLK_HUMAN	211	6.03	Homo sapiens	0	0	0	0	0	0	0	0	0	0	0	0	0	0	0	0	0	0	0	0	0	0	0	0	0	0	0	0	0	0	0	0	0	0	0	0	0	0	0	0	0	0	0	0
455	NADH-cytochrome b5 reductase 3 OS=Homo sapiens GN=CYB5R3 PE=1 SV=3	NB5R3_HUMAN	34	7.68	Homo sapiens	0	0	0	0	0	0	0	0	0	0	0	0	0	0	0	0	0	0	0	0	0	0	0	0	0	0	0	0	0	0	0	0	0	0	0	0	0	0	0	0	0	0	0	0
456	Ig kappa chain V-I region HK102 (Fragment) OS=Homo sapiens GN=IGKV1-5 PE=4 SV=1	KV110_HUMAN	13	8.46	Homo sapiens	0	0	0	0	0	0	0	0	0	0	0	0	0	0	3	0	0	0	0	0	0	0	0	0	0	0	0	0	0	0.230769	0	0	0	0	0	0	0	0	0	0	0	0	0	0
457	Syntaxin-binding protein 2 OS=Homo sapiens GN=STXBP2 PE=1 SV=2	STXB2_HUMAN	66	6.52	Homo sapiens	0	0	0	0	0	0	0	0	0	0	0	0	0	0	0	0	0	0	0	0	0	0	0	0	0	0	0	0	0	0	0	0	0	0	0	0	0	0	0	0	0	0	0	0
458	T-complex protein 1 subunit zeta OS=Homo sapiens GN=CCT6A PE=1 SV=3	TCPZ_HUMAN	58	6.65	Homo sapiens	0	0	0	0	0	0	0	0	0	0	0	0	0	0	0	0	0	0	0	0	0	0	0	0	0	0	0	0	0	0	0	0	0	0	0	0	0	0	0	0	0	0	0	0
459	Secretogranin-1 OS=Homo sapiens GN=CHGB PE=1 SV=2	SCG1_HUMAN	78	4.74	Homo sapiens	0	0	0	0	0	0	0	0	0	0	0	0	0	0	0	0	0	0	0	0	0	0	0	0	0	0	0	0	0	0	0	0	0	0	0	0	0	0	0	0	0	0	0	0
460	Galectin-7 OS=Homo sapiens GN=LGALS7 PE=1 SV=2	LEG7_HUMAN	15	7.78	Homo sapiens	0	0	0	0	0	0	4	4	2	0	0	0	0	0	0	0	0	0	0	0	0	0.266667	0.266667	0.133333	0	0	0	0	0	0	0	0	0	0	0	0	0.00281162	0.00257908	0.00132187	0	0	0	0	0
461	Proteasome subunit beta type-8 OS=Homo sapiens GN=PSMB8 PE=1 SV=3	PSB8_HUMAN	30	7.49	Homo sapiens	0	0	0	0	0	0	0	0	0	0	0	0	0	0	0	0	0	0	0	0	0	0	0	0	0	0	0	0	0	0	0	0	0	0	0	0	0	0	0	0	0	0	0	0
462	Alpha-soluble NSF attachment protein OS=Homo sapiens GN=NAPA PE=1 SV=3	SNAA_HUMAN	33	5.02	Homo sapiens	0	0	0	0	0	0	0	0	0	0	0	0	0	0	0	0	0	0	0	0	0	0	0	0	0	0	0	0	0	0	0	0	0	0	0	0	0	0	0	0	0	0	0	0
463	Laminin subunit beta-1 OS=Homo sapiens GN=LAMB1 PE=1 SV=2	LAMB1_HUMAN	198	4.57	Homo sapiens	0	0	0	0	0	0	0	0	0	0	0	0	0	0	0	0	0	0	0	0	0	0	0	0	0	0	0	0	0	0	0	0	0	0	0	0	0	0	0	0	0	0	0	0
464	Bone morphogenetic protein 1 OS=Homo sapiens GN=BMP1 PE=1 SV=2	BMP1_HUMAN	111	6.89	Homo sapiens	0	2	0	0	0	0	0	0	0	0	0	0	0	0	0	0	0.018018	0	0	0	0	0	0	0	0	0	0	0	0	0	0	0.000239683	0	0	0	0	0	0	0	0	0	0	0	0
465	Rho-associated protein kinase 2 OS=Homo sapiens GN=ROCK2 PE=1 SV=4	ROCK2_HUMAN	161	5.84	Homo sapiens	0	0	0	0	0	0	0	0	0	0	0	0	0	0	0	0	0	0	0	0	0	0	0	0	0	0	0	0	0	0	0	0	0	0	0	0	0	0	0	0	0	0	0	0
466	Four and a half LIM domains protein 1 OS=Homo sapiens GN=FHL1 PE=1 SV=4	FHL1_HUMAN	36	9.15	Homo sapiens	0	0	0	0	0	0	0	0	0	0	0	0	0	0	0	0	0	0	0	0	0	0	0	0	0	0	0	0	0	0	0	0	0	0	0	0	0	0	0	0	0	0	0	0
467	Nucleosome assembly protein 1-like 1 OS=Homo sapiens GN=NAP1L1 PE=1 SV=1	NP1L1_HUMAN	45	4.09	Homo sapiens	0	0	0	0	0	0	0	0	0	0	0	0	0	0	0	0	0	0	0	0	0	0	0	0	0	0	0	0	0	0	0	0	0	0	0	0	0	0	0	0	0	0	0	0
468	Neutrophil gelatinase-associated lipocalin OS=Homo sapiens GN=LCN2 PE=1 SV=2	NGAL_HUMAN	23	9.24	Homo sapiens	0	0	0	0	0	0	3	3	0	0	0	0	0	0	0	0	0	0	0	0	0	0.130435	0.130435	0	0	0	0	0	0	0	0	0	0	0	0	0	0.00137525	0.00126151	0	0	0	0	0	0
469	Dihydropyrimidinase-related protein 2 OS=Homo sapiens GN=DPYSL2 PE=1 SV=1	DPYL2_HUMAN	62	6.33	Homo sapiens	0	0	0	0	0	0	0	0	0	0	0	0	0	0	0	0	0	0	0	0	0	0	0	0	0	0	0	0	0	0	0	0	0	0	0	0	0	0	0	0	0	0	0	0
470	Protein S100-A11 OS=Homo sapiens GN=S100A11 PE=1 SV=2	S10AB_HUMAN	12	7.25	Homo sapiens	0	0	0	0	0	0	2	2	2	0	0	0	0	0	0	0	0	0	0	0	0	0.166667	0.166667	0.166667	0	0	0	0	0	0	0	0	0	0	0	0	0.00175727	0.00161192	0.00165234	0	0	0	0	0
471	Protein diaphanous homolog 1 OS=Homo sapiens GN=DIAPH1 PE=1 SV=2	DIAP1_HUMAN	141	5.07	Homo sapiens	0	0	0	0	0	0	0	0	0	0	0	0	0	0	0	0	0	0	0	0	0	0	0	0	0	0	0	0	0	0	0	0	0	0	0	0	0	0	0	0	0	0	0	0
472	Trypsin-2 OS=Homo sapiens GN=PRSS2 PE=1 SV=1	TRY2_HUMAN	26	4.53	Homo sapiens	0	0	0	0	0	0	0	0	0	0	0	0	0	0	0	0	0	0	0	0	0	0	0	0	0	0	0	0	0	0	0	0	0	0	0	0	0	0	0	0	0	0	0	0
473	14-3-3 protein sigma OS=Homo sapiens GN=SFN PE=1 SV=1	1433S_HUMAN	28	4.39	Homo sapiens	0	0	0	0	0	0	3	5	6	0	0	0	0	0	0	0	0	0	0	0	0	0.107143	0.178571	0.214286	0	0	0	0	0	0	0	0	0	0	0	0	0.00112967	0.00172706	0.00212444	0	0	0	0	0
474	Osteopontin OS=Homo sapiens GN=SPP1 PE=1 SV=1	OSTP_HUMAN	35	4.15	Homo sapiens	0	0	0	0	0	0	0	0	0	0	0	0	0	0	0	0	0	0	0	0	0	0	0	0	0	0	0	0	0	0	0	0	0	0	0	0	0	0	0	0	0	0	0	0
475	Inverted formin-2 OS=Homo sapiens GN=INF2 PE=1 SV=2	INF2_HUMAN	136	5.03	Homo sapiens	0	0	0	0	0	0	0	0	0	0	0	0	0	0	0	0	0	0	0	0	0	0	0	0	0	0	0	0	0	0	0	0	0	0	0	0	0	0	0	0	0	0	0	0
476	T-complex protein 1 subunit theta OS=Homo sapiens GN=CCT8 PE=1 SV=4	TCPQ_HUMAN	60	5.3	Homo sapiens	0	0	0	0	0	0	0	0	0	0	0	0	0	0	0	0	0	0	0	0	0	0	0	0	0	0	0	0	0	0	0	0	0	0	0	0	0	0	0	0	0	0	0	0
477	Brain acid soluble protein 1 OS=Homo sapiens GN=BASP1 PE=1 SV=2	BASP1_HUMAN	23	4.3	Homo sapiens	0	0	0	0	0	0	0	0	0	0	0	0	0	0	0	0	0	0	0	0	0	0	0	0	0	0	0	0	0	0	0	0	0	0	0	0	0	0	0	0	0	0	0	0
478	Protein phosphatase 1A OS=Homo sapiens GN=PPM1A PE=1 SV=1	PPM1A_HUMAN	42	5.02	Homo sapiens	0	0	0	0	0	0	0	0	0	0	0	0	0	0	0	0	0	0	0	0	0	0	0	0	0	0	0	0	0	0	0	0	0	0	0	0	0	0	0	0	0	0	0	0
479	Complement C1r subcomponent-like protein OS=Homo sapiens GN=C1RL PE=1 SV=2	C1RL_HUMAN	53	7.2	Homo sapiens	0	0	0	0	0	0	0	0	0	0	0	0	0	0	0	0	0	0	0	0	0	0	0	0	0	0	0	0	0	0	0	0	0	0	0	0	0	0	0	0	0	0	0	0
480	Plakophilin-1 OS=Homo sapiens GN=PKP1 PE=1 SV=2	PKP1_HUMAN	83	9.41	Homo sapiens	0	0	0	0	0	0	2	0	3	0	0	0	0	0	0	0	0	0	0	0	0	0.0240964	0	0.0361446	0	0	0	0	0	0	0	0	0	0	0	0	0.000254062	0	0.000358339	0	0	0	0	0
481	Prelamin-A/C OS=Homo sapiens GN=LMNA PE=1 SV=1	LMNA_HUMAN	74	7.01	Homo sapiens	0	0	0	0	0	0	0	2	0	0	0	0	0	0	0	0	0	0	0	0	0	0	0.027027	0	0	0	0	0	0	0	0	0	0	0	0	0	0	0.000261393	0	0	0	0	0	0
482	Extended synaptotagmin-1 OS=Homo sapiens GN=ESYT1 PE=1 SV=1	ESYT1_HUMAN	123	5.61	Homo sapiens	0	0	0	0	0	0	0	0	0	0	0	0	0	0	0	0	0	0	0	0	0	0	0	0	0	0	0	0	0	0	0	0	0	0	0	0	0	0	0	0	0	0	0	0
483	Late cornified envelope protein 1B OS=Homo sapiens GN=LCE1B PE=1 SV=1	LCE1B_HUMAN	12	8.4	Homo sapiens	0	0	0	0	0	0	0	3	0	0	0	0	0	0	0	0	0	0	0	0	0	0	0.25	0	0	0	0	0	0	0	0	0	0	0	0	0	0	0.00241789	0	0	0	0	0	0
484	Insulin-like growth factor-binding protein 1 OS=Homo sapiens GN=IGFBP1 PE=1 SV=1	IBP1_HUMAN	28	4.86	Homo sapiens	0	0	0	0	0	0	0	0	0	0	0	0	0	0	0	0	0	0	0	0	0	0	0	0	0	0	0	0	0	0	0	0	0	0	0	0	0	0	0	0	0	0	0	0
485	Ras-related protein Rab-14 OS=Homo sapiens GN=RAB14 PE=1 SV=4	RAB14_HUMAN	24	6.13	Homo sapiens	0	0	0	0	0	0	0	0	0	0	0	0	0	0	0	0	0	0	0	0	0	0	0	0	0	0	0	0	0	0	0	0	0	0	0	0	0	0	0	0	0	0	0	0
486	Annexin A11 OS=Homo sapiens GN=ANXA11 PE=1 SV=1	ANX11_HUMAN	54	7.77	Homo sapiens	0	0	0	0	0	0	0	0	0	0	0	0	0	0	0	0	0	0	0	0	0	0	0	0	0	0	0	0	0	0	0	0	0	0	0	0	0	0	0	0	0	0	0	0
487	Drebrin-like protein OS=Homo sapiens GN=DBNL PE=1 SV=1	DBNL_HUMAN	48	4.72	Homo sapiens	0	0	0	0	0	0	0	0	0	0	0	0	0	0	0	0	0	0	0	0	0	0	0	0	0	0	0	0	0	0	0	0	0	0	0	0	0	0	0	0	0	0	0	0
488	Ras-related protein Rab-8A OS=Homo sapiens GN=RAB8A PE=1 SV=1	RAB8A_HUMAN	24	9.54	Homo sapiens	0	0	0	0	0	0	0	0	0	0	0	0	0	0	0	0	0	0	0	0	0	0	0	0	0	0	0	0	0	0	0	0	0	0	0	0	0	0	0	0	0	0	0	0
489	Dermatopontin OS=Homo sapiens GN=DPT PE=1 SV=2	DERM_HUMAN	24	4.44	Homo sapiens	0	0	0	0	0	0	0	0	0	0	0	0	0	0	0	0	0	0	0	0	0	0	0	0	0	0	0	0	0	0	0	0	0	0	0	0	0	0	0	0	0	0	0	0
490	Alpha-2-macroglobulin-like protein 1 OS=Homo sapiens GN=A2ML1 PE=1 SV=3	A2ML1_HUMAN	161	5.47	Homo sapiens	0	0	0	0	0	0	2	2	2	0	0	0	0	0	0	0	0	0	0	0	0	0.0124224	0.0124224	0.0124224	0	0	0	0	0	0	0	0	0	0	0	0	0.000130976	0.000120143	0.000123156	0	0	0	0	0
491	Transforming growth factor beta-1-induced transcript 1 protein OS=Homo sapiens GN=TGFB1I1 PE=1 SV=2	TGFI1_HUMAN	50	7.03	Homo sapiens	0	0	0	0	0	0	0	0	0	0	0	0	0	0	0	0	0	0	0	0	0	0	0	0	0	0	0	0	0	0	0	0	0	0	0	0	0	0	0	0	0	0	0	0
492	ATPase inhibitor, mitochondrial OS=Homo sapiens GN=ATPIF1 PE=1 SV=1	ATIF1_HUMAN	12	10.05	Homo sapiens	0	0	0	0	0	0	0	0	0	0	0	0	0	0	0	0	0	0	0	0	0	0	0	0	0	0	0	0	0	0	0	0	0	0	0	0	0	0	0	0	0	0	0	0
493	Protocadherin Fat 2 OS=Homo sapiens GN=FAT2 PE=1 SV=2	FAT2_HUMAN	479	4.79	Homo sapiens	0	0	0	0	0	0	0	0	0	0	0	0	0	0	0	0	0	0	0	0	0	0	0	0	0	0	0	0	0	0	0	0	0	0	0	0	0	0	0	0	0	0	0	0
494	72 kDa type IV collagenase OS=Homo sapiens GN=MMP2 PE=1 SV=2	MMP2_HUMAN	74	5.09	Homo sapiens	0	0	0	0	0	0	0	0	0	0	0	0	0	0	0	0	0	0	0	0	0	0	0	0	0	0	0	0	0	0	0	0	0	0	0	0	0	0	0	0	0	0	0	0
495	Poly(rC)-binding protein 1 OS=Homo sapiens GN=PCBP1 PE=1 SV=2	PCBP1_HUMAN	37	7.11	Homo sapiens	0	0	0	0	0	0	0	0	0	0	0	0	0	0	0	0	0	0	0	0	0	0	0	0	0	0	0	0	0	0	0	0	0	0	0	0	0	0	0	0	0	0	0	0
496	Glutamine synthetase OS=Homo sapiens GN=GLUL PE=1 SV=4	GLNA_HUMAN	42	6.88	Homo sapiens	0	0	0	0	0	0	2	2	2	0	0	0	0	0	0	0	0	0	0	0	0	0.047619	0.047619	0.047619	0	0	0	0	0	0	0	0	0	0	0	0	0.000502076	0.00046055	0.000472098	0	0	0	0	0
497	Protein POF1B OS=Homo sapiens GN=POF1B PE=1 SV=3	POF1B_HUMAN	68	6.28	Homo sapiens	0	0	0	0	0	0	0	2	0	0	0	0	0	0	0	0	0	0	0	0	0	0	0.0294118	0	0	0	0	0	0	0	0	0	0	0	0	0	0	0.000284457	0	0	0	0	0	0
498	Cornifin-A OS=Homo sapiens GN=SPRR1A PE=1 SV=2	SPR1A_HUMAN	10	8.6	Homo sapiens	0	0	0	0	0	0	2	0	2	0	0	0	0	0	0	0	0	0	0	0	0	0.2	0	0.2	0	0	0	0	0	0	0	0	0	0	0	0	0.00210872	0	0.00198281	0	0	0	0	0
499	Voltage-dependent anion-selective channel protein 1 OS=Homo sapiens GN=VDAC1 PE=1 SV=2	VDAC1_HUMAN	31	8.89	Homo sapiens	0	0	0	0	0	0	3	0	0	0	0	0	0	0	0	0	0	0	0	0	0	0.0967742	0	0	0	0	0	0	0	0	0	0	0	0	0	0	0.00102035	0	0	0	0	0	0	0
500	Platelet-activating factor acetylhydrolase OS=Homo sapiens GN=PLA2G7 PE=1 SV=1	PAFA_HUMAN	50	7.61	Homo sapiens	0	0	0	0	0	0	0	0	0	0	0	0	0	0	0	0	0	0	0	0	0	0	0	0	0	0	0	0	0	0	0	0	0	0	0	0	0	0	0	0	0	0	0	0
501	Sorcin OS=Homo sapiens GN=SRI PE=1 SV=1	SORCN_HUMAN	22	5.2	Homo sapiens	0	0	0	0	0	0	0	0	0	0	0	0	0	0	0	0	0	0	0	0	0	0	0	0	0	0	0	0	0	0	0	0	0	0	0	0	0	0	0	0	0	0	0	0
502	Proteasome subunit beta type-1 OS=Homo sapiens GN=PSMB1 PE=1 SV=2	PSB1_HUMAN	26	8.3	Homo sapiens	0	0	0	0	0	0	0	0	0	0	0	0	0	0	0	0	0	0	0	0	0	0	0	0	0	0	0	0	0	0	0	0	0	0	0	0	0	0	0	0	0	0	0	0
503	NAD(P) transhydrogenase, mitochondrial OS=Homo sapiens GN=NNT PE=1 SV=3	NNTM_HUMAN	114	8.21	Homo sapiens	0	0	0	0	0	0	0	0	0	0	0	0	0	0	0	0	0	0	0	0	0	0	0	0	0	0	0	0	0	0	0	0	0	0	0	0	0	0	0	0	0	0	0	0
504	Hexokinase-1 OS=Homo sapiens GN=HK1 PE=1 SV=3	HXK1_HUMAN	102	6.78	Homo sapiens	0	0	0	0	0	0	0	0	0	0	0	0	0	0	0	0	0	0	0	0	0	0	0	0	0	0	0	0	0	0	0	0	0	0	0	0	0	0	0	0	0	0	0	0
505	Minor histocompatibility protein HA-1 OS=Homo sapiens GN=HMHA1 PE=1 SV=2	HMHA1_HUMAN	125	6	Homo sapiens	0	0	0	0	0	0	0	0	0	0	0	0	0	0	0	0	0	0	0	0	0	0	0	0	0	0	0	0	0	0	0	0	0	0	0	0	0	0	0	0	0	0	0	0
506	Microtubule-associated protein 1A OS=Homo sapiens GN=MAP1A PE=1 SV=6	MAP1A_HUMAN	30	4.85	Homo sapiens	0	0	0	0	0	0	0	0	0	0	0	0	0	0	0	0	0	0	0	0	0	0	0	0	0	0	0	0	0	0	0	0	0	0	0	0	0	0	0	0	0	0	0	0
507	Grancalcin OS=Homo sapiens GN=GCA PE=1 SV=2	GRAN_HUMAN	24	4.82	Homo sapiens	0	0	0	0	0	0	0	0	0	0	0	0	0	0	0	0	0	0	0	0	0	0	0	0	0	0	0	0	0	0	0	0	0	0	0	0	0	0	0	0	0	0	0	0
508	Tyrosine-protein kinase BTK OS=Homo sapiens GN=BTK PE=1 SV=3	BTK_HUMAN	76	7.86	Homo sapiens	0	0	0	0	0	0	0	0	0	0	0	0	0	0	0	0	0	0	0	0	0	0	0	0	0	0	0	0	0	0	0	0	0	0	0	0	0	0	0	0	0	0	0	0
509	Involucrin OS=Homo sapiens GN=IVL PE=1 SV=2	INVO_HUMAN	68	4.3	Homo sapiens	0	0	0	0	0	0	0	2	2	0	0	0	0	0	0	0	0	0	0	0	0	0	0.0294118	0.0294118	0	0	0	0	0	0	0	0	0	0	0	0	0	0.000284457	0.00029159	0	0	0	0	0
510	Late cornified envelope protein 2B OS=Homo sapiens GN=LCE2B PE=2 SV=1	LCE2B_HUMAN	11	8.13	Homo sapiens	0	0	0	0	0	0	2	2	0	0	0	0	0	0	0	0	0	0	0	0	0	0.181818	0.181818	0	0	0	0	0	0	0	0	0	0	0	0	0	0.00191702	0.00175846	0	0	0	0	0	0
511	Cellular retinoic acid-binding protein 2 OS=Homo sapiens GN=CRABP2 PE=1 SV=2	RABP2_HUMAN	16	5.07	Homo sapiens	0	0	0	0	0	0	0	0	2	0	0	0	0	0	0	0	0	0	0	0	0	0	0	0.125	0	0	0	0	0	0	0	0	0	0	0	0	0	0	0.00123926	0	0	0	0	0
512	Integrin alpha-2 OS=Homo sapiens GN=ITGA2 PE=1 SV=1	ITA2_HUMAN	129	4.95	Homo sapiens	0	0	0	0	0	0	0	0	0	0	0	0	0	0	0	0	0	0	0	0	0	0	0	0	0	0	0	0	0	0	0	0	0	0	0	0	0	0	0	0	0	0	0	0
513	Serine/threonine-protein phosphatase 2A 65 kDa regulatory subunit A alpha isoform OS=Homo sapiens GN=PPP2R1A PE=1 SV=4	2AAA_HUMAN	65	4.75	Homo sapiens	0	0	0	0	0	0	0	0	0	0	0	0	0	0	0	0	0	0	0	0	0	0	0	0	0	0	0	0	0	0	0	0	0	0	0	0	0	0	0	0	0	0	0	0
514	Ras-related protein Rab-5C OS=Homo sapiens GN=RAB5C PE=1 SV=2	RAB5C_HUMAN	23	8.61	Homo sapiens	0	0	0	0	0	0	0	0	0	0	0	0	0	0	0	0	0	0	0	0	0	0	0	0	0	0	0	0	0	0	0	0	0	0	0	0	0	0	0	0	0	0	0	0
515	Protein S100-A2 OS=Homo sapiens GN=S100A2 PE=1 SV=3	S10A2_HUMAN	11	4.42	Homo sapiens	0	0	0	0	0	0	0	0	3	0	0	0	0	0	0	0	0	0	0	0	0	0	0	0.272727	0	0	0	0	0	0	0	0	0	0	0	0	0	0	0.00270383	0	0	0	0	0
516	RAS guanyl-releasing protein 2 OS=Homo sapiens GN=RASGRP2 PE=1 SV=1	GRP2_HUMAN	69	7.85	Homo sapiens	0	0	0	0	0	0	0	0	0	0	0	0	0	0	0	0	0	0	0	0	0	0	0	0	0	0	0	0	0	0	0	0	0	0	0	0	0	0	0	0	0	0	0	0
517	Kallikrein-10 OS=Homo sapiens GN=KLK10 PE=1 SV=3	KLK10_HUMAN	30	8.67	Homo sapiens	0	0	0	0	0	0	0	0	2	0	0	0	0	0	0	0	0	0	0	0	0	0	0	0.0666667	0	0	0	0	0	0	0	0	0	0	0	0	0	0	0.000660937	0	0	0	0	0
518	Dynein light chain 1, cytoplasmic OS=Homo sapiens GN=DYNLL1 PE=1 SV=1	DYL1_HUMAN	10	7.5	Homo sapiens	0	0	0	0	0	0	0	0	2	0	0	0	0	0	0	0	0	0	0	0	0	0	0	0.2	0	0	0	0	0	0	0	0	0	0	0	0	0	0	0.00198281	0	0	0	0	0
519	Hemoglobin subunit gamma-1 OS=Homo sapiens GN=HBG1 PE=1 SV=2	HBG1_HUMAN	16	7.23	Homo sapiens	0	0	0	0	0	6	0	0	0	0	0	0	0	0	0	0	0	0	0	0	0.375	0	0	0	0	0	0	0	0	0	0	0	0	0	0	0.00444551	0	0	0	0	0	0	0	0
520	Serpin B13 OS=Homo sapiens GN=SERPINB13 PE=1 SV=2	SPB13_HUMAN	44	5.47	Homo sapiens	0	0	0	0	0	0	0	2	0	0	0	0	0	0	0	0	0	0	0	0	0	0	0.0454545	0	0	0	0	0	0	0	0	0	0	0	0	0	0	0.000439616	0	0	0	0	0	0
521	Thymidine phosphorylase OS=Homo sapiens GN=TYMP PE=1 SV=2	TYPH_HUMAN	50	5.19	Homo sapiens	0	0	0	0	0	0	2	0	0	0	0	0	0	0	0	0	0	0	0	0	0	0.04	0	0	0	0	0	0	0	0	0	0	0	0	0	0	0.000421744	0	0	0	0	0	0	0
522	Prothymosin alpha OS=Homo sapiens GN=PTMA PE=1 SV=2	PTMA_HUMAN	12	3.41	Homo sapiens	0	0	0	0	0	0	0	0	0	0	0	0	0	0	0	0	0	0	0	0	0	0	0	0	0	0	0	0	0	0	0	0	0	0	0	0	0	0	0	0	0	0	0	0
523	Thrombospondin-2 OS=Homo sapiens GN=THBS2 PE=1 SV=2	TSP2_HUMAN	130	4.41	Homo sapiens	0	0	0	0	0	0	0	0	0	0	0	0	0	0	0	0	0	0	0	0	0	0	0	0	0	0	0	0	0	0	0	0	0	0	0	0	0	0	0	0	0	0	0	0
524	cAMP-dependent protein kinase type I-alpha regulatory subunit OS=Homo sapiens GN=PRKAR1A PE=1 SV=1	KAP0_HUMAN	43	5	Homo sapiens	0	0	0	0	0	0	0	0	0	0	0	0	0	0	0	0	0	0	0	0	0	0	0	0	0	0	0	0	0	0	0	0	0	0	0	0	0	0	0	0	0	0	0	0
[truncated: 308 more columns]

## Sheet: MW average 5 individ
#DOTAP, Samples Report created on 01/07/2016						DOTAP_CTRL					DOTAP_Glioblastoma					DOTAP_Lung					DOTAP_Meningioma					DOTAP_Mieloma					DOTAP_Pancreas
						80.6681	79.3133	99.7025	96.4236	98.6706	80.7617	76.2862	76.893	61.7245	59.7522	95.7822	83.8017	84.9848	105.581	96.9016	64.6696	70.5437	73.7501	68.8956	46.4911	74.8179	90.7838	95.8553	110.906	86.3209	94.6123	89.3777	99.1341	90.9511	56.1125
#	Identified Proteins (524)	Accession Number	Molecular Weight /kDa	pI	Taxonomy	DOTAP_CTRL_1	DOTAP_CTRL_2	DOTAP_CTRL_3	DOTAP_CTRL_4	DOTAP_CTRL_5	DOTAP_Glioblastoma_1	DOTAP_Glioblastoma_2	DOTAP_Glioblastoma_3	DOTAP_Glioblastoma_4	DOTAP_Glioblastoma_5	DOTAP_Lung_1	DOTAP_Lung_2	DOTAP_Lung_3	DOTAP_Lung_4	DOTAP_Lung_5	DOTAP_Meningioma_1	DOTAP_Meningioma_2	DOTAP_Meningioma_3	DOTAP_Meningioma_4	DOTAP_Meningioma_5	DOTAP_Mieloma_1	DOTAP_Mieloma_2	DOTAP_Mieloma_3	DOTAP_Mieloma_4	DOTAP_Mieloma_5	DOTAP_Pancreas_1	DOTAP_Pancreas_2	DOTAP_Pancreas_3	DOTAP_Pancreas_4	DOTAP_Pancreas_5
1	Apolipoprotein B-100 OS=Homo sapiens GN=APOB PE=1 SV=2	APOB_HUMAN	516	7.04	Homo sapiens	0.00116375	0.00156933	0.0011468	0.0152078	0.0161353	0.0194459	0.0240803	0.0203522	0.0224933	0.02511	0.00277149	0.00258423	0.0023771	0.00500792	0.00563723	0.0191377	0.0262872	0.028005	0.0227149	0.0206519	0.00886275	0.00650504	0.00769204	0.0108546	0.00601435	0.0015841	0.00176545	0.00184458	0.00463513	0.00771814
2	Serum albumin OS=Homo sapiens GN=ALB PE=1 SV=2	ALBU_HUMAN	69	6.21	Homo sapiens	0.0277141	0.023972	0.0283723	0.0524589	0.0491299	0.0584681	0.0769515	0.0593536	0.0543806	0.0497293	0.035208	0.0463486	0.0427197	0.0410383	0.0434916	0.0649107	0.0534941	0.0889494	0.0552291	0.0613341	0.0197921	0.0268763	0.0232358	0.0156869	0.0200388	0.0384479	0.0361674	0.0583824	0.0302485	0.0381604
3	Vitronectin OS=Homo sapiens GN=VTN PE=1 SV=1	VTNC_HUMAN	54	5.54	Homo sapiens	0.0424399	0.038591	0.041191	0.0612962	0.0579852	0.0433318	0.0310535	0.0311119	0.0384736	0.0341621	0.0520737	0.055708	0.0477196	0.0701146	0.0589862	0.0351422	0.0339476	0.0309588	0.0353988	0.0390017	0.0156662	0.0170781	0.0198982	0.00967359	0.011296	0.0363418	0.0342829	0.0255231	0.0400531	0.0447176											14	0.00208602	0.00184932	0.00225021
4	Prothrombin OS=Homo sapiens GN=F2 PE=1 SV=2	THRB_HUMAN	70	5.7	Homo sapiens	0.064514	0.0697448	0.055165	0.0238791	0.022677	0.0184394	0.0200983	0.0183011	0.0102754	0.00972212	0.0292055	0.0320365	0.0332599	0.0288733	0.0279832	0.0130352	0.0139816	0.0126537	0.0169451	0.0194035	0.0292973	0.0222519	0.0293043	0.0125404	0.016155	0.0494744	0.0416231	0.0420745	0.0466319	0.0348023											41	0.0686571	0.0674982	0.0667456
5	Complement C4-A OS=Homo sapiens GN=C4A PE=1 SV=2	CO4A_HUMAN	193	7.08	Homo sapiens	0.0233296	0.0261408	0.0231708	0.0047278	0.0040953	0.00487694	0.00442304	0.00356021	0.00293817	0.00316792	0.0123134	0.0120311	0.013615	0.00874949	0.0106392	0.00365641	0.00553473	0.00416588	0.00424179	0.00343138	0.00787594	0.00826363	0.0130435	0.00470808	0.00436255	0.0207933	0.0169136	0.0182397	0.0103681	0.00709957											82	0.104149	0.0996724	0.0964477
6	Complement C3 OS=Homo sapiens GN=C3 PE=1 SV=2	CO3_HUMAN	187	6.34	Homo sapiens	0.00425696	0.00520744	0.00391943	0.0108141	0.0118191	0.00904244	0.00833351	0.00792322	0.0132848	0.0129927	0.0150754	0.0135347	0.0124227	0.0139559	0.0145194	0.00711789	0.00774083	0.00928253	0.00755289	0.00665877	0.0221995	0.0119444	0.0114374	0.0197402	0.0125752	0.00489862	0.00494618	0.00395564	0.00674651	0.00668189											116	0.127822	0.11918	0.118213
7	C4b-binding protein alpha chain OS=Homo sapiens GN=C4BPA PE=1 SV=2	C4BPA_HUMAN	67	7.31	Homo sapiens	0.0585261	0.0570928	0.0471838	0.0261696	0.0231333	0.0160327	0.0144876	0.0134038	0.00515906	0.0048769	0.0165198	0.0161769	0.0208444	0.0173001	0.022068	0.00553013	0.015678	0.00964847	0.0167057	0.0181043	0.0294649	0.0262108	0.0381468	0.0295964	0.0315731	0.0412291	0.0387077	0.0287541	0.0366947	0.0416651											144	0.226987	0.221974	0.204307
8	Clusterin OS=Homo sapiens GN=CLU PE=1 SV=1	CLUS_HUMAN	52	6.21	Homo sapiens	0.0452063	0.0415004	0.0368209	0.0111782	0.00993814	0.0122548	0.0112602	0.0101908	0.00861388	0.0072911	0.0232946	0.0294726	0.0338737	0.0233736	0.0255983	0.0104189	0.0116298	0.00947387	0.00818917	0.00928429	0.0202589	0.029954	0.0332412	0.0156633	0.0144094	0.0323209	0.0322379	0.0237344	0.0283333	0.0166822											191	0.347166	0.348136	0.329035
9	Fibrinogen beta chain OS=Homo sapiens GN=FGB PE=1 SV=2	FIBB_HUMAN	56	8.38	Homo sapiens	0.0150978	0.0116868	0.0115967	0.0110606	0.0147297	0.00147997	0.00302504	0.00132543	0.00810693	0.00813214	0	0.00105486	0.0014679	0.00118473	0.0012267	0.00258485	0.00329752	0.00347429	0.000827142	0.000340747	0.0364146	0.0220307	0.0188172	0.0363191	0.126053	0.0437894	0.0634346	0.0464009	0.0728358	0.0357829											259	0.500598	0.491398	0.480554
10	Fibrinogen alpha chain OS=Homo sapiens GN=FGA PE=1 SV=2	FIBA_HUMAN	95	5.87	Homo sapiens	0.00791366	0.00568809	0.00626203	0.0052539	0.0069025	0.00126099	0.00170622	0.000742517	0.00511036	0.00587003	0.00110011	0.000950096	0.0013667	0.00132783	0.00112482	0.000980513	0.0020387	0.00152209	0.00104607	0.00124385	0.0115841	0.011518	0.00816412	0.0154154	0.0551524	0.0195829	0.0308834	0.0161065	0.0320303	0.0154167											310	0.61038	0.59312	0.578429
11	Inter-alpha-trypsin inhibitor heavy chain H2 OS=Homo sapiens GN=ITIH2 PE=1 SV=2	ITIH2_HUMAN	106	6.85	Homo sapiens	0.00755073	0.00902489	0.00607511	0.00424144	0.00439867	0.00718465	0.00701439	0.00684989	0.00595542	0.00634237	0.0114257	0.0143434	0.0135489	0.0131602	0.0128577	0.00871076	0.00727933	0.0048203	0.0080723	0.0102041	0.0127162	0.0135348	0.0118099	0.00584106	0.00742645	0.00920593	0.00587644	0.00828001	0.0146398	0.00739769											375	0.735023	0.699393	0.690112
12	Inter-alpha-trypsin inhibitor heavy chain H1 OS=Homo sapiens GN=ITIH1 PE=1 SV=3	ITIH1_HUMAN	101	6.78	Homo sapiens	0.00614133	0.00700559	0.00560483	0.00345472	0.00327717	0.00748171	0.00646589	0.00619531	0.00427736	0.0035414	0.011543	0.016163	0.0160389	0.0200213	0.0153999	0.00816889	0.00733883	0.00362448	0.00475523	0.00502922	0.0183943	0.0155263	0.0129812	0.0058911	0.0097841	0.00878913	0.00683786	0.00902014	0.015131	0.00653487											442	0.805487	0.766399	0.756983
13	Apolipoprotein A-I OS=Homo sapiens GN=APOA1 PE=1 SV=1	APOA1_HUMAN	31	5.5	Homo sapiens	0.0123985	0.0117996	0.0104908	0.0237787	0.025392	0.0418138	0.0705179	0.0623633	0.0611517	0.0535955	0.0155992	0.0181134	0.0193537	0.0161026	0.0171942	0.0317009	0.0401238	0.0552511	0.064159	0.0610647	0.0427691	0.0292409	0.0310842	0.0203794	0.0310202	0.0139768	0.0140582	0.0117066	0.0201225	0.0169508											524	1	1	1
14	Apolipoprotein A-IV OS=Homo sapiens GN=APOA4 PE=1 SV=3	APOA4_HUMAN	45	5.05	Homo sapiens	0.0419984	0.0454788	0.0290691	0.0109544	0.00983333	0.0115161	0.0158276	0.0119775	0.0135633	0.0126991	0.01299	0.015841	0.0156732	0.0129867	0.0179575	0.0117129	0.0130264	0.0113486	0.0106929	0.0134659	0.0300334	0.0379382	0.0394203	0.0131021	0.0183674	0.00900209	0.010625	0.00993907	0.0207384	0.00510641
15	Fibronectin OS=Homo sapiens GN=FN1 PE=1 SV=4	FINC_HUMAN	263	5.45	Homo sapiens	0.000787943	0.000516982	0.000648864	0.00194673	0.00239035	0.00436425	0.00464176	0.00319635	0.0222234	0.0211743	0.000384286	0.000432784	0.000653963	0.000576983	0.000339662	0.00646457	0.0049479	0.00606727	0.00194294	0.00226813	0.00413735	0.00350718	0.00187798	0.00389376	0.0102345	0.000187617	0.000922302	0.000408579	0.00214571	0.00112554
16	Hyaluronan-binding protein 2 OS=Homo sapiens GN=HABP2 PE=1 SV=1	HABP2_HUMAN	63	6.52	Homo sapiens	0.0106012	0.011927	0.00973901	0.0201713	0.0184977	0.0143498	0.0123752	0.0147005	0.0130245	0.015944	0.0150858	0.0135427	0.0141421	0.0202033	0.0141964	0.0143285	0.0158675	0.0107607	0.0187379	0.0117344	0.00353747	0.00501327	0.00596281	0.00348751	0.00288145	0.00547995	0.00793118	0.00474694	0.0134086	0.0137791
17	Alpha-1-antitrypsin OS=Homo sapiens GN=SERPINA1 PE=1 SV=3	A1AT_HUMAN	47	5.31	Homo sapiens	0.0133856	0.0140171	0.00983831	0.0109565	0.0102057	0.0214397	0.0156121	0.015104	0.0102143	0.0105945	0.0117751	0.0117778	0.0119476	0.00981372	0.0125152	0.022728	0.0155841	0.023656	0.0220814	0.0249797	0.0303321	0.0136674	0.0128749	0.0135039	0.0125591	0.0101971	0.0100111	0.00994061	0.0129048	0.0109086
18	Apolipoprotein E OS=Homo sapiens GN=APOE PE=1 SV=1	APOE_HUMAN	36	5.42	Homo sapiens	0.0259073	0.0275606	0.0197932	0.0194832	0.0202719	0.0209925	0.0172807	0.0217081	0.0292565	0.0180642	0.014702	0.0176965	0.0147148	0.0193927	0.0220783	0.0216297	0.0195714	0.0145757	0.0158163	0.0158688	0.0187621	0.0186603	0.0184494	0.0139447	0.012015	0.0142865	0.0137682	0.0131721	0.0154165	0.0198186
19	Fibrinogen gamma chain OS=Homo sapiens GN=FGG PE=1 SV=3	FIBG_HUMAN	52	5.32	Homo sapiens	0.00804225	0.00813134	0.00701955	0.0080592	0.0111826	0.000729476	0.00167183	0.00079974	0.00664526	0.00472451	0.000204041	0.000687426	0.00135865	0.000911199	0.000857478	0.000887437	0.00198426	0.00130496	0	0.000285487	0.014582	0.0148369	0.00849077	0.0272791	0.0794564	0.0172106	0.0295686	0.020683	0.0474762	0.0329554										DOTAP_CTRL
20	Apolipoprotein C-III OS=Homo sapiens GN=APOC3 PE=1 SV=1	APOC3_HUMAN	11	5.04	Homo sapiens	0.0450524	0.0367283	0.0364938	0.12986	0.124059	0.0624098	0.0330376	0.0323757	0.0309538	0.0220803	0.0312965	0.0587938	0.0665303	0.0771674	0.0550556	0.0258889	0.027922	0.0242076	0.0153717	0.0199776	0.0130733	0.0675617	0.0909479	0.0295512	0.0186093	0.124903	0.108494	0.0823352	0.0831417	0.0885762									N° prot	DOTAP_CTRL_1	DOTAP_CTRL_2	DOTAP_CTRL_3	DOTAP_CTRL_4	DOTAP_CTRL_5
21	Inter-alpha-trypsin inhibitor heavy chain H3 OS=Homo sapiens GN=ITIH3 PE=1 SV=2	ITIH3_HUMAN	100	5.49	Homo sapiens	0.00685677	0.00741785	0.00572632	0.00274236	0.00263528	0.00585771	0.00419436	0.00546357	0.00183508	0.00156091	0.00793401	0.00834629	0.0119287	0.00616264	0.0081496	0.00365918	0.00727558	0.00185297	0.00470571	0.00549108	0.0117513	0.00639189	0.00650378	0.004029	0.00382214	0.0072216	0.00720819	0.00767232	0.00717118	0.0053808								>300	14	0.00208602	0.00184932	0.00225021	0.0177573	0.0187194
22	Protein AMBP OS=Homo sapiens GN=AMBP PE=1 SV=1	AMBP_HUMAN	39	6.15	Homo sapiens	0.0215675	0.0195684	0.01954	0.00504089	0.00459145	0.0114286	0.00942363	0.0125407	0.00873213	0.00583852	0.0277526	0.0278977	0.0318143	0.0146422	0.0154331	0.0100446	0.010879	0.00730371	0.00842845	0.0118624	0.0152418	0.0225968	0.0232648	0.00432176	0.0121791	0.0232197	0.0225619	0.0229271	0.0139107	0.00968753								150-300	27	0.0665711	0.0656488	0.0644954	0.0291868	0.0288732
23	Keratin, type II cytoskeletal 1 OS=Homo sapiens GN=KRT1 PE=1 SV=6	K2C1_HUMAN	66	8.33	Homo sapiens	0.00601291	0.00881236	0.00632948	0.00652721	0.00742516	0.0127841	0.00839507	0.00937268	0.0121215	0.0128162	0.00996343	0.0100849	0.00963705	0.0045902	0.00833437	0.0152169	0.0119763	0.0156858	0.0102804	0.0124407	0.0113173	0.00762286	0.00463469	0.00970524	0.00280858	0.00736624	0.00418202	0.00540063	0.00488431	0.0123742								100-150	41	0.0354921	0.0321742	0.0297021	0.0197103	0.0192222
24	Alpha-2-macroglobulin OS=Homo sapiens GN=A2M PE=1 SV=3	A2MG_HUMAN	163	6.43	Homo sapiens	0.00180714	0.00181127	0.00211515	0.00399086	0.00329487	0.00760155	0.00701835	0.00859945	0.00520195	0.00595628	0.000320871	0.000683151	0.000744972	0.00174315	0.00193875	0.00351051	0.00516263	0.00951064	0.0109829	0.0104195	0.00396279	0.0019133	0.00132365	0.00184618	0.00061642	0.000756628	0.00174011	0.00181521	0.00142413	0.00215624								80-100	34	0.0236732	0.0195079	0.0217648	0.0156944	0.0170258
25	Vitamin K-dependent protein S OS=Homo sapiens GN=PROS1 PE=1 SV=1	PROS_HUMAN	75	5.37	Homo sapiens	0.0137982	0.0164685	0.012132	0.00770132	0.0066199	0.0047268	0.00484907	0.00428061	0.00122605	0.00120361	0.00329573	0.00338422	0.00438705	0.00437695	0.00467581	0.00102694	0.00263435	0.00235426	0.0024764	0.00364974	0.00743303	0.0072438	0.00885462	0.00557385	0.00556058	0.0112745	0.0100446	0.00846765	0.0183925	0.010631								70-80	28	0.0991648	0.102794	0.0860945	0.0496435	0.0455109
26	Serotransferrin OS=Homo sapiens GN=TF PE=1 SV=3	TRFE_HUMAN	77	7.13	Homo sapiens	0.00574587	0.00357161	0.00661276	0.00982177	0.00899323	0.0103315	0.0115974	0.0105813	0.00840826	0.00975887	0.00501504	0.00581503	0.00836689	0.00656465	0.00826437	0.0113149	0.00979433	0.00968544	0.00747506	0.00777702	0.00132882	0.00415521	0.00451923	0.00219111	0.00315989	0.00288339	0.00377384	0.00650385	0.00320326	0.00274218								60-70	47	0.120179	0.126162	0.124728	0.124807	0.126313
27	Talin-1 OS=Homo sapiens GN=TLN1 PE=1 SV=3	TLN1_HUMAN	270	5.94	Homo sapiens	0.00274869	0.0010089	0.00215895	0	0	0.00193491	0.000754458	0.00108389	0.00173773	0.00229222	0.000695771	0.00133712	0.000974892	0.00237514	0.00213014	0.0039072	0.00225253	0.00102081	0.000911618	0.000631492	0.00182699	0.004208	0.00337371	0.0038881	0.00188963	0.0013178	0.00172611	0.00399832	0.000294363	0.00238628								50-60	68	0.153432	0.143262	0.151519	0.136292	0.143943
28	Myosin-9 OS=Homo sapiens GN=MYH9 PE=1 SV=4	MYH9_HUMAN	227	5.29	Homo sapiens	0.00550643	0.00200013	0.00489658	0	0	0.00158788	0.00059516	0.00128483	0.00118738	0.00217219	0.000107247	0.000365645	0.000311069	0.00065357	0.000637665	0.0029286	0.0025188	0.0006163	0.00210134	0.00141265	0.000363642	0.00333407	0.00383052	0.00377745	0.00253417	0.00180011	0.00267623	0.00502519	0.000338953	0.00504177								40-50	51	0.109783	0.101722	0.097875	0.0579091	0.0585376
29	Apolipoprotein D OS=Homo sapiens GN=APOD PE=1 SV=1	APOD_HUMAN	21	4.79	Homo sapiens	0.0161808	0.0186108	0.0097022	0.0321422	0.0337758	0.0306212	0.0510388	0.0415764	0.0357269	0.0329161	0.0146013	0.0195068	0.0186745	0.0215268	0.0188545	0.0284778	0.0312562	0.034863	0.0289377	0.0284241	0.0138598	0.0208226	0.0231946	0.0141647	0.0102915	0.0171169	0.0145454	0.00865372	0.0134928	0.019382								30-40	65	0.124642	0.106273	0.111683	0.0950711	0.0965075
30	Kininogen-1 OS=Homo sapiens GN=KNG1 PE=1 SV=2	KNG1_HUMAN	72	6.8	Homo sapiens	0.00734942	0.00653639	0.00555683	0.00430959	0.00370591	0.00473586	0.00401356	0.00317345	0.00247086	0.00223147	0.00903962	0.00982129	0.0123091	0.00687864	0.00793451	0.00329626	0.00360013	0.00238475	0.00277523	0.00429719	0.0097669	0.0112749	0.0116894	0.00576434	0.0069701	0.00753567	0.00678967	0.00498744	0.00583835	0.00558								20-30	67	0.0704647	0.0670065	0.0668716	0.0707087	0.0717404
31	Filamin-A OS=Homo sapiens GN=FLNA PE=1 SV=4	FLNA_HUMAN	281	5.95	Homo sapiens	0.00251795	0.000913158	0.00198424	0	0	0.00204257	0.000962525	0.00098028	0.00121076	0.00192676	0.000681645	0.00120419	0.00108675	0.00216708	0.00137154	0.00341419	0.00227425	0.00119005	0.0013586	0.000967279	0.000900197	0.00220803	0.00205407	0.0024167	0.00232161	0.00121613	0.00171288	0.00348104	0.000528036	0.00371333								<20	82	0.194513	0.233601	0.243017	0.38322	0.373607
32	Ig gamma-1 chain C region OS=Homo sapiens GN=IGHG1 PE=1 SV=1	IGHG1_HUMAN	36	8.31	Homo sapiens	0.0137853	0.0131098	0.0121611	0.00904795	0.00947821	0.0136564	0.015905	0.0136761	0.00915318	0.0116211	0.00802362	0.012427	0.0134311	0.00991651	0.0102208	0.0146162	0.0187696	0.0165728	0.0247626	0.021475	0.0160788	0.0108217	0.00937149	0.00735503	0.00954096	0.0108611	0.0102644	0.0114883	0.0103514	0.00770613								tot	524	1	1	1	1	1
33	Apolipoprotein C-II OS=Homo sapiens GN=APOC2 PE=1 SV=1	APOC2_HUMAN	11	4.36	Homo sapiens	0.0219216	0.0253232	0.0185532	0.107395	0.101047	0.035742	0.0214857	0.0291927	0.0559715	0.0326196	0.0395672	0.0465021	0.0345613	0.0924217	0.0725529	0.0333649	0.0244314	0.0217833	0.0186179	0.0252613	0.0128733	0.0180422	0.0341373	0.016641	0.00702107	0.0557283	0.0362572	0.0320928	0.056318	0.0774765
34	Thrombospondin-1 OS=Homo sapiens GN=THBS1 PE=1 SV=2	TSP1_HUMAN	129	4.51	Homo sapiens	0.003395	0.00221023	0.00303627	0.000383529	0.000366611	0.00489523	0.00452126	0.00487516	0.00158786	0.000514632	0.000863828	0.00138405	0.00154724	0.00837161	0.00626674	0.00455319	0.00425636	0.00560608	0.00363318	0.0044337	0.0010576	0.00258953	0.00274872	0.00258197	0.0024856	0.00240328	0.00156196	0.00328303	0.00130513	0.00235536
35	Ceruloplasmin OS=Homo sapiens GN=CP PE=1 SV=1	CERU_HUMAN	122	5.5	Homo sapiens	0.00133176	0.00172573	0.00101255	0.00373779	0.00348889	0.00369233	0.00430304	0.00382228	0.00190673	0.00279146	0.00199752	0.00185681	0.00199185	0.0020195	0.00233859	0.00261838	0.00308878	0.00355635	0.00306572	0.00363333	0.00619433	0.00345914	0.00310774	0.00325112	0.00319678	0.00453492	0.00421957	0.00380352	0.00443808	0.00272772
36	Complement factor H OS=Homo sapiens GN=CFH PE=1 SV=4	CFAH_HUMAN	139	6.59	Homo sapiens	0.00216764	0.00114871	0.00167745	0.00176978	0.00155519	0.00337561	0.00528357	0.00447856	0.00213547	0.00169085	0.00345608	0.00346106	0.0036952	0.00215945	0.00242473	0.0025912	0.00336935	0.00487645	0.0020654	0.00231878	0.00425431	0.00337956	0.00285452	0.00248579	0.00180465	0.00103882	0.00163876	0.00135401	0.00137467	0.000952035
37	Ig mu chain C region OS=Homo sapiens GN=IGHM PE=1 SV=3	IGHM_HUMAN	49	6.77	Homo sapiens	0.00490519	0.00515621	0.00546979	0.00320154	0.00344738	0.00421783	0.00858193	0.00807709	0.0130066	0.0132106	0.00313115	0.00452111	0.005608	0.00510112	0.00540521	0.0109247	0.00666822	0.00452102	0.015156	0.0127896	0.00399447	0.00441548	0.0115642	0.0153126	0.00960747	0.00330582	0.00449271	0.00281401	0.00306735	0.00543692
38	Apolipoprotein A-II OS=Homo sapiens GN=APOA2 PE=1 SV=1	APOA2_HUMAN	11	6.6	Homo sapiens	0.0143693	0.018422	0.0124362	0.0355975	0.0294502	0.0315321	0.0286251	0.0377874	0.0421941	0.0300766	0.00664311	0.0135379	0.0128552	0.0195324	0.0203359	0.0224938	0.0261891	0.0382084	0.103787	0.0704392	0.0253353	0.0316991	0.0265506	0.0396304	0.0431993	0.0131309	0.0129177	0.0143654	0.0179487	0.0194583
39	Haptoglobin OS=Homo sapiens GN=HP PE=1 SV=1	HPT_HUMAN	45	6.56	Homo sapiens	0.00386752	0.00409407	0.00505143	0.00831282	0.00878476	0.00745311	0.0138163	0.0118799	0.00935844	0.0115548	0.00672953	0.00521371	0.0073053	0.00301695	0.00711169	0.00873241	0.00924375	0.0106484	0.00904142	0.00966206	0.0108724	0.00612195	0.00525765	0.00547894	0.00806436	0.00399296	0.00522899	0.00574972	0.00523555	0.00592617
40	Keratin, type I cytoskeletal 9 OS=Homo sapiens GN=KRT9 PE=1 SV=3	K1C9_HUMAN	62	4.89	Homo sapiens	0.00290629	0.00484597	0.00253715	0.00466704	0.00517774	0.00668251	0.00444756	0.00506244	0.008364	0.00742417	0.00544299	0.00498978	0.00493659	0.00209746	0.00549712	0.00680193	0.0071592	0.00839064	0.00692329	0.00858298	0.00590374	0.00444373	0.00263635	0.00586028	0.00193265	0.00335261	0.00180545	0.00319956	0.00341669	0.00639514
41	Apolipoprotein(a) OS=Homo sapiens GN=LPA PE=1 SV=1	APOA_HUMAN	501	5.77	Homo sapiens	0.000105512	0.000152338	5.95579e-05	0.00216021	0.00217842	0.00110257	0.000486336	0.000513765	0.000495776	0.000435907	0.000312591	0.000207785	0.000258427	0.000126195	0.000287789	0.00222184	0.00263399	0.000803186	0.000511727	0.000568114	0.000372107	0.000278751	0.00107594	0.000408377	9.24982e-05	0	0.000208681	5.37556e-05	0.000464803	0.00107028
42	Serum amyloid A-1 protein OS=Homo sapiens GN=SAA1 PE=1 SV=1	SAA1_HUMAN	14	6.79	Homo sapiens	0.0068266	0.00714407	0.0057239	0.00963438	0.00988412	0.0115396	0.00877645	0.0309087	0.0142577	0.00756686	0.0653533	0.0315457	0.0179516	0.00879958	0.0130293	0.00436986	0.0107769	0.010012	0.0278329	0.0327985	0.0644807	0.0117816	0.00496556	0.0825333	0.0604157	0.0120805	0.0101496	0.00505284	0.00647767	0.00943582
43	Complement component C9 OS=Homo sapiens GN=C9 PE=1 SV=2	CO9_HUMAN	63	5.27	Homo sapiens	0.00297608	0.00301464	0.00222589	0.00242605	0.002145	0.00235407	0.0011786	0.00236247	0.00368719	0.00314332	0.00840472	0.00618453	0.00728504	0.0049589	0.0068782	0.00179343	0.00240284	0.00129146	0.00327421	0.00270946	0.00738267	0.00600544	0.00540807	0.00799868	0.00919379	0.00547988	0.00450656	0.00416291	0.00567616	0.00272831
44	Serum paraoxonase/arylesterase 1 OS=Homo sapiens GN=PON1 PE=1 SV=3	PON1_HUMAN	40	4.89	Homo sapiens	0.00953713	0.00980439	0.00828351	0.00700406	0.00701014	0.00753404	0.0091947	0.00725385	0.00594184	0.00589388	0.00252202	0.00333841	0.00313444	0.00433816	0.00455732	0.00615637	0.00674418	0.00768069	0.00809924	0.00703134	0.00549756	0.00541508	0.00860542	0.00383088	0.00405642	0.0108332	0.0132367	0.0106764	0.00992377	0.00606515
45	Keratin, type I cytoskeletal 10 OS=Homo sapiens GN=KRT10 PE=1 SV=6	K1C10_HUMAN	59	4.88	Homo sapiens	0.00272766	0.00559042	0.00373639	0.00446764	0.00441053	0.00638652	0.00406934	0.00446536	0.00585963	0.00780643	0.00454405	0.00548944	0.00471701	0.00299885	0.00513722	0.00856566	0.00673186	0.00743146	0.00607503	0.00609349	0.00440806	0.00386425	0.00241738	0.00274957	0.00163893	0.00352401	0.00132785	0.00153702	0.00246455	0.0089928
46	Actin, cytoplasmic 2 OS=Homo sapiens GN=ACTG1 PE=1 SV=1	ACTG_HUMAN	42	5.16	Homo sapiens	0.00872951	0.00256933	0.00947999	0.000753301	0.000643404	0.00421475	0.00355097	0.00444146	0.00643832	0.00885645	0.00604562	0.00658525	0.00607394	0.00774528	0.00818431	0.00930098	0.00529224	0.00505756	0.00410928	0.00324279	0.00322977	0.00611789	0.00678627	0.00716097	0.00698606	0.00620577	0.00629079	0.0106455	0.00236009	0.00862062
47	Complement C1s subcomponent OS=Homo sapiens GN=C1S PE=1 SV=1	C1S_HUMAN	77	4.59	Homo sapiens	0.00237428	0.0024265	0.00211511	0.000449372	0.000307305	0.00134882	0.000854145	0.00123602	0.00063131	0.000734934	0.000902577	0.00124309	0.00183458	0.00074052	0.000936291	0.00113886	0.00190559	0.000703703	0.000943747	0.00074859	0.00416798	0.0022455	0.00235039	0.00339986	0.00266207	0.0109801	0.00881997	0.0106975	0.0104246	0.0058313
48	Gelsolin OS=Homo sapiens GN=GSN PE=1 SV=1	GELS_HUMAN	86	6.19	Homo sapiens	0.00493277	0.0040089	0.00513925	0.00225296	0.00227831	0.00139006	0.00122297	0.000908171	0.00162994	0.0019468	0.000927369	0.00171597	0.00177354	0.00528323	0.00311559	0.00168886	0.00169756	0.00173315	0.001905	0.00154664	0.00288602	0.00213604	0.00198115	0.00412835	0.0043072	0.00209063	0.00208198	0.00230678	0.00430091	0.00334972
49	Retinol-binding protein 4 OS=Homo sapiens GN=RBP4 PE=1 SV=3	RET4_HUMAN	23	5.85	Homo sapiens	0.00108679	0.000515422	0.000738752	0.00227992	0.00249405	0.0130184	0.018585	0.00927976	0.00399084	0.00339329	0.00666822	0.00756914	0.0054544	0.00780117	0.00733719	0.00741457	0.00864507	0.00255265	0.00174298	0.00438767	0.0231208	0.056487	0.0344567	0.0194377	0.0215023	0.00336904	0.00391034	0.0039457	0.00289496	0.00183454
50	Keratin, type II cytoskeletal 2 epidermal OS=Homo sapiens GN=KRT2 PE=1 SV=2	K22E_HUMAN	65	8.17	Homo sapiens	0.00277081	0.00454804	0.00319707	0.0041211	0.00483538	0.0072989	0.00376386	0.00463142	0.00698681	0.00678259	0.00621096	0.00617222	0.00549503	0.00281572	0.00587946	0.00934343	0.00597094	0.0063309	0.00682456	0.00833208	0.00358787	0.00344765	0.00219466	0.00281616	0.00130714	0.0024392	0.00178033	0.00201673	0.00206521	0.00671202
51	Ig alpha-1 chain C region OS=Homo sapiens GN=IGHA1 PE=1 SV=2	IGHA1_HUMAN	38	6.49	Homo sapiens	0.00578401	0.00440968	0.00535962	0.00567761	0.00568874	0.00619439	0.00771762	0.00999406	0.00837526	0.00640862	0.00778351	0.00698101	0.00495275	0.00441122	0.00525095	0.00516723	0.00722797	0.0170053	0.00815029	0.00861101	0.00143471	0.00347663	0.00393325	0.00379515	0.000710357	0.00621293	0.00648001	0.00389336	0.00355396	0.00528057
52	Ig kappa chain C region OS=Homo sapiens GN=IGKC PE=1 SV=1	IGKC_HUMAN	12	5.68	Homo sapiens	0.0187544	0.0140762	0.0170138	0.0194298	0.0222399	0.01957	0.0229568	0.0172023	0.0243011	0.0307242	0.0174139	0.0165988	0.0179504	0.0157831	0.0194855	0.0172997	0.0211921	0.0240933	0.0354164	0.0409633	0.0244083	0.0128702	0.0115954	0.0195451	0.0109472	0.0140935	0.0139669	0.0162653	0.0185804	0.0160823
53	Coagulation factor V OS=Homo sapiens GN=F5 PE=1 SV=4	FA5_HUMAN	252	5.95	Homo sapiens	0.00120703	0.00134906	0.00104655	0.000808605	0.000549334	0.000540283	0.000485051	0.000402504	0.000514401	0.000592261	0.000608166	0.000579193	0.000574572	0.00087858	0.000777634	0.000509136	0.000600675	0.000359625	0.000537159	0.000432951	0.00115919	0.0011963	0.00111755	0.00166048	0.000796675	0.000727038	0.000767331	0.000800902	0.00102106	0.00114214
54	Plasminogen OS=Homo sapiens GN=PLG PE=1 SV=2	PLMN_HUMAN	91	7.25	Homo sapiens	0.00208353	0.00247251	0.00194792	0.00315484	0.00252274	0.00362582	0.00412503	0.00317973	0.00255019	0.00285807	0.00156858	0.00123095	0.00138059	0.00166609	0.00124377	0.00350682	0.0035961	0.00362504	0.00165475	0.00327813	0.00152617	0.00113188	0.000954259	0.000791101	0.00148398	0.000697222	0.00245792	0.00125762	0.00241753	0.000958941
55	Vitamin D-binding protein OS=Homo sapiens GN=GC PE=1 SV=1	VTDB_HUMAN	53	5.21	Homo sapiens	0.00120449	0.00114179	0.00139123	0.00333579	0.00293177	0.00475784	0.00378498	0.00424384	0.0036761	0.00410684	0.00197258	0.00255663	0.0025936	0.0021483	0.0024029	0.00630696	0.00464689	0.00511392	0.00362644	0.00381181	0.00468771	0.00595637	0.00492189	0.00566744	0.00349551	0.00199426	0.00189736	0.00310729	0.00166025	0.00254354
56	Complement C5 OS=Homo sapiens GN=C5 PE=1 SV=4	CO5_HUMAN	188	6.49	Homo sapiens	0.000222792	0.000207625	0.000143113	0.00163378	0.00201353	0.000746816	0.00129653	0.000840567	0.0013823	0.00251644	0.000851035	0.000901602	0.000919501	0.000990778	0.000788148	0.000299192	0.000529453	0.000746287	0.00123289	0.00143755	0.0016555	0.000839851	0.000777136	0.00191855	0.000738708	0.000224749	0.000239011	0.00026863	0.000490383	0
57	von Willebrand factor OS=Homo sapiens GN=VWF PE=1 SV=4	VWF_HUMAN	309	5.15	Homo sapiens	0.000737399	5.67491e-05	0.000531403	0.000332924	0.000339179	0.000478994	0.000951119	0.000674714	0.00183483	0.00137396	0	3.9487e-05	0	0	0	8.34411e-05	0.000352188	0.000292727	0.000165714	4.8043e-05	0.00259231	0.00147423	0.000619109	0.000623059	0.00251147	2.28506e-05	4.76993e-05	0.000206231	0.000908399	0.000359582
58	Coagulation factor IX OS=Homo sapiens GN=F9 PE=1 SV=2	FA9_HUMAN	52	5.16	Homo sapiens	0.00467821	0.00448794	0.00412033	0.00384475	0.00422236	0.00325553	0.00478383	0.00264214	0.00271048	0.00257517	0.00234341	0.00199317	0.00218929	0.00242548	0.00244716	0.0019801	0.00227652	0.00252105	0.00125357	0.00158295	0.00329948	0.00318239	0.00361146	0.00184873	0.00185672	0.005284	0.006389	0.00420287	0.00606223	0.0037584
59	Transthyretin OS=Homo sapiens GN=TTR PE=1 SV=1	TTHY_HUMAN	16	5.58	Homo sapiens	0.00390429	0.00405861	0.00316974	0.00778009	0.00738912	0.0126856	0.0163401	0.0106193	0.00336744	0.00807827	0.0110944	0.0119529	0.0107974	0.00907746	0.00943178	0.0131838	0.0115253	0.0101632	0.0057841	0.00325321	0.0239192	0.0211092	0.0132607	0.00996061	0.00529752	0.00484325	0.00582563	0.00567573	0.00255854	0.0026399
60	Platelet factor 4 OS=Homo sapiens GN=PF4 PE=1 SV=2	PLF4_HUMAN	11	8.78	Homo sapiens	0.0112888	0.00478315	0.0103626	0	0	0.0135705	0.0230122	0.0232737	0.0280431	0.0245012	0.0319461	0.0249536	0.022859	0.00917982	0.0146836	0.0239267	0.0188989	0.0168644	0.0113871	0.00851699	0.0046625	0.012028	0.0161362	0.0103883	0.00843639	0.00191869	0.00441725	0.00671434	0	0.00648609
61	Inter-alpha-trypsin inhibitor heavy chain H4 OS=Homo sapiens GN=ITIH4 PE=1 SV=4	ITIH4_HUMAN	103	6.97	Homo sapiens	0.000157004	0.0003321	0.000195011	0.00195571	0.00223102	0.00187986	0.00135594	0.00132893	0.00125534	0.00144197	0.00283763	0.00231801	0.00259404	0.00135004	0.00193563	0.00135394	0.00198029	0.00083424	0.00306287	0.00198663	0.00160691	0.000571921	0.000303877	0.000409172	7.50677e-05	0.00041047	0.000291538	0.00104584	0.00132578	0.000693117
62	Apolipoprotein M OS=Homo sapiens GN=APOM PE=1 SV=2	APOM_HUMAN	21	5.92	Homo sapiens	0.00556747	0.0054923	0.00541417	0.0068013	0.00820347	0.00807547	0.00939505	0.00935629	0.00513961	0.00636115	0.00363926	0.00512915	0.00485362	0.0079524	0.00703949	0.00640044	0.00628779	0.00752419	0.0100863	0.00841738	0.00228229	0.00402579	0.00762291	0.00414541	0.00331011	0.00520023	0.00318458	0.00239541	0.00320555	0.0047836
63	Complement C1r subcomponent OS=Homo sapiens GN=C1R PE=1 SV=2	C1R_HUMAN	80	6.14	Homo sapiens	0.000514323	0.000526368	0.000620424	0.000259995	0.000464739	0.00139706	0.000652272	0.000707444	0	0	0.00108816	0.00115636	0.00224838	0.000669946	0.00103256	0.00129163	0.00224685	0.00124429	0.000766392	0.000487981	0.0052472	0.00238435	0.00226137	0.0025975	0.00270267	0.00321464	0.00335756	0.0033192	0.00381963	0.00204583
64	Ig gamma-3 chain C region OS=Homo sapiens GN=IGHG3 PE=1 SV=2	IGHG3_HUMAN	41	7.95	Homo sapiens	0.00874521	0.00794837	0.00770485	0.00752663	0.00675773	0.0128956	0.0116832	0.0115812	0.00671331	0.00758065	0.00645274	0.00826201	0.00795104	0.00661911	0.00713839	0.0109434	0.010134	0.0136703	0.0179752	0.0167074	0.00188454	0.00492774	0.00576781	0.004695	0.00243579	0.00687291	0.00954732	0.00828437	0.0070979	0.00399169
65	Hemoglobin subunit beta OS=Homo sapiens GN=HBB PE=1 SV=2	HBB_HUMAN	16	7.32	Homo sapiens	0.00574369	0.0373385	0.00398075	0.00695261	0.0069731	0.00362934	0.00651113	0.00608939	0.00675601	0.00697775	0.0132685	0.0159542	0.0144954	0.0130207	0.0133281	0.0129063	0.0121213	0.0124324	0.0127939	0.0137346	0.00342344	0.00274667	0.00478377	0.00263215	0	0.00330535	0.00464835	0.00461127	0.00662354	0.00428616
66	Integrin alpha-IIb OS=Homo sapiens GN=ITGA2B PE=1 SV=3	ITA2B_HUMAN	113	5.03	Homo sapiens	0.00202335	0.000803346	0.00162574	0.000158935	0.000119901	0.00200564	0.000542494	0.000901478	0.000958514	0.00237363	0.000185795	0.000819089	0.000764813	0.00187377	0.00133888	0.00292136	0.00175728	0.00127879	0.0010742	0.00116258	0	0.00155978	0.000831917	0.001597	0.000513011	0.000841564	0.00115695	0.00208362	0	0.00287469
67	Serum amyloid A-4 protein OS=Homo sapiens GN=SAA4 PE=1 SV=2	SAA4_HUMAN	15	9.38	Homo sapiens	0.00333282	0.00248567	0.003108	0.00870671	0.0094585	0.0158748	0.0134455	0.0186435	0.0201878	0.0145053	0.0064896	0.00689388	0.00680475	0.00546834	0.00963108	0.0110593	0.0157821	0.0123557	0.0112477	0.0158586	0.00889667	0.0078495	0.00741669	0.00700821	0.0102914	0.00751712	0.00769902	0.00268506	0.00831281	0.00739612
68	Heparin cofactor 2 OS=Homo sapiens GN=SERPIND1 PE=1 SV=3	HEP2_HUMAN	57	6.89	Homo sapiens	0.00210151	0.00309351	0.00198081	0.00171286	0.00183908	0.00158007	0.000929707	0.000729587	0.000470193	0.00243378	0.00304952	0.00333132	0.00247861	0.00309858	0.00211312	0.00109113	0.00157898	0.00111109	0.00156218	0.00308772	0.00201273	0.00199559	0.00134224	0.00316426	0.00135494	0.00129719	0.00117259	0.00129634	0.00413263	0.00204207
69	Integrin beta-3 OS=Homo sapiens GN=ITGB3 PE=1 SV=2	ITB3_HUMAN	87	4.85	Homo sapiens	0.0021466	0.000731026	0.00214957	8.54805e-05	0.000193618	0.00185354	0.000947903	0.000756145	0.00142625	0.00270053	0.000679469	0.00092614	0.00072109	0.00238915	0.00138637	0.00301127	0.00163312	0.0012981	0.000966107	0.000897436	7.72275e-05	0.00148168	0.00111999	0.00203692	0.00133315	0.000810438	0.000514346	0.00231985	7.96764e-05	0.00325159
70	C4b-binding protein beta chain OS=Homo sapiens GN=C4BPB PE=1 SV=1	C4BPB_HUMAN	28	4.8	Homo sapiens	0.00979198	0.00949455	0.0066998	0.00331582	0.00362152	0.00237131	0.00219557	0.0012306	0	0	0.00198822	0.00137327	0.00308072	0.0029403	0.00283553	0.00035789	0.00151975	0.000968594	0.000637652	0.00254047	0.00595709	0.00550965	0.00621141	0.00397537	0.00468948	0.00667049	0.00653643	0.00540073	0.00445188	0.00593583
71	Vitamin K-dependent protein C OS=Homo sapiens GN=PROC PE=1 SV=1	PROC_HUMAN	52	6.23	Homo sapiens	0.00385601	0.00436958	0.0034693	0.00359385	0.00376795	0.00190026	0.00191752	0.00130242	0.000934825	0.000615002	0.00200803	0.00153584	0.00120679	0.00170254	0.00198244	0	0.000545552	0.00104343	0.000482637	0.00101019	0.00174418	0.00282547	0.00220826	0.00156109	0.00111481	0.00318463	0.00315455	0.00245713	0.00325106	0.00324826
72	Hemoglobin subunit alpha OS=Homo sapiens GN=HBA1 PE=1 SV=2	HBA_HUMAN	15	9.09	Homo sapiens	0.00564117	0.0341866	0.00468137	0.005488	0.00540386	0.00415464	0.00522398	0.00660359	0.00288544	0.00453372	0.0113736	0.0138055	0.0128247	0.0128629	0.0096524	0.0102992	0.00594958	0.00843272	0.00691085	0.00751791	0.00723574	0.00268332	0.00440968	0.000410982	0	0.00328613	0.0039671	0.0033731	0.00456706	0.000707404
73	Tropomyosin alpha-4 chain OS=Homo sapiens GN=TPM4 PE=1 SV=3	TPM4_HUMAN	29	4.36	Homo sapiens	0.00777541	0.0061867	0.00762611	0	0	0.00442824	0.00243434	0.00301681	0.000568298	0.0024944	0.000474964	0.00150598	0.0014907	0.00554372	0.00295788	0.0026685	0.00243676	0.000620383	0.00196315	0.00314103	0.00164386	0.00697784	0.00683399	0.0071658	0.00306521	0.00303633	0.00359499	0.00706268	0	0.00773928
74	Antithrombin-III OS=Homo sapiens GN=SERPINC1 PE=1 SV=1	ANT3_HUMAN	53	6.68	Homo sapiens	0.000166505	0.000181846	0.000629303	0.00190036	0.00146538	0.00232688	0.00156277	0.00222992	0.000301654	0.00221876	0.00315081	0.00327913	0.0032558	0.00428801	0.00344404	0.00253216	0.00286086	0.00170665	0.00152684	0.00217515	0.00239872	0.00416639	0.00347569	0.000678297	0.000292929	0.00133049	0.00105547	0.00145841	0.00143643	0.000200209
75	Immunoglobulin lambda-like polypeptide 5 OS=Homo sapiens GN=IGLL5 PE=2 SV=2	IGLL5_HUMAN	23	9.05	Homo sapiens	0.00354293	0.00289904	0.00303834	0.00437373	0.0044088	0.00754511	0.0070318	0.00799872	0.00564053	0.00635006	0.00484338	0.00432047	0.00442996	0.00342443	0.0053811	0.00738628	0.00803947	0.0129724	0.00325155	0.00724979	0.00162894	0.0025473	0.00407922	0.00366047	0.00453208	0.00429106	0.00340538	0.00160692	0.00259357	0.00298248
76	Complement component C6 OS=Homo sapiens GN=C6 PE=1 SV=3	CO6_HUMAN	105	6.74	Homo sapiens	0.000518348	0.000597394	0.000382593	0.000135631	0.000161349	0.000392056	0.0007454	0.000781938	0.000359395	0.000626864	0.00185721	0.00184896	0.00231746	0.00174749	0.00173544	0.000445689	0.00071972	0.00034524	0.000367346	0.000429595	0.00211505	0.00213707	0.00232047	0.00234465	0.0013981	0.000335894	0	6.31763e-05	0	0
77	Vitamin K-dependent protein Z OS=Homo sapiens GN=PROZ PE=1 SV=2	PROZ_HUMAN	45	5.87	Homo sapiens	0.00262665	0.00389905	0.00253953	0.00283639	0.00345441	0.00284438	0.00272041	0.00299596	0.00156125	0.00148066	0.00239524	0.00133337	0.000874962	0.00336224	0.00259862	0.000448947	0.000619056	0.00341667	0.00143733	0.00145651	0.000912917	0.000572378	0.00224497	0.00100656	0.00145909	0.00227017	0.00132521	0.00246469	0.00195453	0.00252648
78	Histidine-rich glycoprotein OS=Homo sapiens GN=HRG PE=1 SV=1	HRG_HUMAN	60	7.52	Homo sapiens	0.00122372	0.0016669	0.000898192	0.00293402	0.00264574	0.00275846	0.00210722	0.00207202	0.00314729	0.00353928	0.000868592	0.000957892	0.00117961	0.00168012	0.00172018	0.00284834	0.00291024	0.00324462	0.000948856	0.00153091	0.00137606	0.001469	0.00127513	0.0024556	0.000257314	0.000469145	0.000621168	0.000839126	0.00207623	0.00114475
79	Serum amyloid A-2 protein OS=Homo sapiens GN=SAA2 PE=1 SV=1	SAA2_HUMAN	14	9.48	Homo sapiens	0.00308647	0.00169235	0.00453444	0.00962559	0.00964949	0.0048296	0.0112588	0.00682079	0.00802703	0.00557469	0.0800224	0.0276175	0.0137096	0	0.00958598	0	0.016544	0.00969273	0.00720672	0.0106428	0.0730904	0.0123292	0.00446901	0.0645076	0.0485479	0.00754731	0.015987	0.00408666	0	0.00524305
80	Hornerin OS=Homo sapiens GN=HRNR PE=1 SV=2	HORN_HUMAN	282	10.24	Homo sapiens	0.000156081	0.000191362	0.000165892	0.000390486	0.000395372	0.000630281	0.000325725	0.000373865	0.000685986	0.00102349	0.000480898	0.000319333	0.000417507	5.62431e-05	0.000378825	0.000618899	0.000635528	0.000721631	0.000389224	0.000480942	0.000265714	0.000326449	0.000222463	0.000607329	0.000123358	0	9.24072e-05	0	0.000132875	0.000365822
81	Plasma protease C1 inhibitor OS=Homo sapiens GN=SERPING1 PE=1 SV=2	IC1_HUMAN	55	6.52	Homo sapiens	0.00016045	0.000478391	0	0.000694491	0.000798182	0.00104046	0.000311828	0.000218224	0	0	0.00682951	0.0047818	0.00385923	0.00350825	0.00274616	0	0.000436079	0	0.000324623	0	0.00487896	0.0038773	0.00316346	0.00300862	0.00119246	0.00198454	0.00182104	0.00269216	0.00141227	0.000479713
82	Apolipoprotein C-I OS=Homo sapiens GN=APOC1 PE=1 SV=1	APOC1_HUMAN	9	9.17	Homo sapiens	0.00202865	0.00740836	0.00590539	0.0119334	0.0123847	0.0132636	0.0135711	0.0117979	0.0108332	0.00797454	0.00619193	0.00520583	0.00435662	0.00669601	0.00917758	0.0131513	0.015733	0.00905077	0.00772951	0.0137721	0.0110524	0.0142765	0.0150622	0.00704055	0.00857791	0.00743911	0.00953783	0.00746076	0.0106155	0.0111597
83	Alpha-actinin-1 OS=Homo sapiens GN=ACTN1 PE=1 SV=2	ACTN1_HUMAN	103	5.07	Homo sapiens	0.0010545	7.66759e-05	0.0012591	0	0	0.000607933	8.85442e-05	0.000176097	0.000470856	0.00074987	0	0.000272676	7.4895e-05	0.000923084	0.000300615	0.00155207	0.000776262	0.000658813	6.54091e-05	0.000162821	0.00116658	0.00217497	0.0019235	0.00446523	0.00202535	6.80537e-05	0.000435689	0.0019604	0	0.000716108
84	Ig lambda-2 chain C regions OS=Homo sapiens GN=IGLC2 PE=1 SV=1	LAC2_HUMAN	11	7.34	Homo sapiens	0.0100063	0.00394881	0.0136951	0.0125489	0.0129048	0.0119229	0.00634861	0.0402602	0.0215862	0.0198756	0.0136042	0.00933717	0.0192796	0.010889	0.019381	0.0182581	0.02021	0.0373926	0.0107953	0.017245	0.0027486	0.00629621	0	0.0142197	0.0256164	0.0163402	0.0135573	0.011318	0.00373789	0.0115212
85	Cartilage oligomeric matrix protein OS=Homo sapiens GN=COMP PE=1 SV=2	COMP_HUMAN	83	4.16	Homo sapiens	0.00336381	0.00423847	0.00250023	0.00212098	0.00232041	0.000351026	9.89861e-05	0.000171775	0	0.000123881	8.29756e-05	8.73045e-05	0	0.000992024	0.000540202	0.000670817	0.000568591	0.000871884	0.000564164	0.000678166	0.000619465	0.00128257	0.0011313	0.00028851	0.000605801	0.00135897	0.00234191	0.00153941	0.00310295	0.00220152
86	Alpha-1-antichymotrypsin OS=Homo sapiens GN=SERPINA3 PE=1 SV=2	AACT_HUMAN	48	5.19	Homo sapiens	0	0.000164649	0	0.00224922	0.00168871	0.0026568	0.00290768	0.00262793	0.0014626	0.00289011	0.00399128	0.00300807	0.00294638	0.00256299	0.00214887	0.00140177	0.00177304	0.0012235	0.00121768	0.00195776	0.00632296	0.00236876	0.00181059	0.0013761	0.000886448	0.000659448	0.00155518	0.000980505	0.00317868	0.00208632
87	Beta-2-glycoprotein 1 OS=Homo sapiens GN=APOH PE=1 SV=3	APOH_HUMAN	38	8.03	Homo sapiens	0.00398738	0.000831764	0.00378365	0.00410519	0.00417833	0.00490759	0.00495474	0.00351344	0.00398066	0.00350046	0.00109668	0.00105395	0.00113236	0.00116103	0.000268346	0.00365817	0.00497465	0.00487783	0.00455165	0.00217366	0.000265215	0.00105986	0.00137364	0.000553238	0.000203473	0.00194771	0.00324026	0.00442432	0.000674932	0.00235873
88	C-reactive protein OS=Homo sapiens GN=CRP PE=1 SV=1	CRP_HUMAN	25	5.32	Homo sapiens	0.00129371	0.00133367	0.00134575	0.00303539	0.00243193	0.00512486	0.00139754	0.00339186	0	0.00268787	0.00792971	0.00496798	0.00861112	0.00137964	0.0067476	0.00126742	0.00583925	0.00452189	0.01113	0.00842768	0.00540574	0.000890269	0	0.00324707	0.00416483	0.00211187	0.00627922	0.00201943	0.00133089	0.0101447
89	Complement C4-B OS=Homo sapiens GN=C4B PE=1 SV=2	CO4B_HUMAN	193	7.28	Homo sapiens	0.0237102	0.0261612	0.0234952	0.00483621	0.00427042	0.00496388	0	0.00138887	0.0029379	0.00340241	0.0127641	0.0124531	0.0141038	0.00929117	0.0110318	0.00121336	0.00577793	0.00132449	0.00277443	0.0036471	0.00821604	0.00858608	0.0133855	0.00477063	0.00452283	0.0213046	0.0174159	0.0188679	0.0107704	0.00726376
90	Coagulation factor X OS=Homo sapiens GN=F10 PE=1 SV=2	FA10_HUMAN	55	5.74	Homo sapiens	0.002698	0.00352503	0.00243008	0.00126399	0.00104258	0.000676605	0.00120065	0.000520671	0	0.000901607	0.00316347	0.0017696	0.0008558	0.000629868	0.000687638	0.000277683	0.00017802	0.000330568	0.000211324	0.000574833	0.00236072	0.00293532	0.00322735	0.00163814	0.00133337	0.00134515	0.00142209	0.00159082	0.00298479	0.00129722
91	Complement factor B OS=Homo sapiens GN=CFB PE=1 SV=2	CFAB_HUMAN	86	7.07	Homo sapiens	0.00038442	9.18328e-05	0.000502166	0.00176271	0.00149281	0.00183114	0.00188478	0.00191166	0.00112787	0.00122618	0.00154011	0.00129184	0.00136713	0.000771451	0.00104059	0.00114657	0.00132532	0.00273381	0.00138837	0.000994181	0.00105611	0.000597857	0.000688295	0.000665119	0.000269282	8.21958e-05	0.00030301	0.000625998	0.000177322	0.000985192
92	CD5 antigen-like OS=Homo sapiens GN=CD5L PE=1 SV=1	CD5L_HUMAN	38	5.15	Homo sapiens	0.00226224	0.00223904	0.00227636	0.00155578	0.00159969	0.00216535	0.00335099	0.00278599	0.00326969	0.00307329	0.000640659	0.00150078	0.00185823	0.00174117	0.00216943	0.00395823	0.00285086	0.0026166	0.00404537	0.00389848	0.00198199	0.00270863	0.00311272	0.00308906	0.00233454	0.00213217	0.00265458	0.00168265	0.00166204	0.00264357
93	Apolipoprotein L1 OS=Homo sapiens GN=APOL1 PE=1 SV=5	APOL1_HUMAN	44	5.55	Homo sapiens	0.000917842	0.000597988	0.000678148	0.00164173	0.00169021	0.00149267	0.00324272	0.00306132	0.00587099	0.00618885	0.000868459	0.000910231	0.00115825	0.00237235	0.00195812	0.00221145	0.00236226	0.00308189	0.00217987	0.00139544	0.000543182	0.00183514	0.00134604	0.00102496	0.00166671	0.000640327	0.000847047	0.000231419	0.0015745	0.00036174
94	Keratin, type I cytoskeletal 16 OS=Homo sapiens GN=KRT16 PE=1 SV=4	K1C16_HUMAN	51	4.69	Homo sapiens	0.0012969	0.00274333	0.00550244	0.00211209	0.0065031	0.00404415	0.00179584	0.00146772	0.00265167	0.00464802	0.00259375	0.00259224	0.0029179	0.00143163	0.00337257	0.00507045	0.00352447	0.00451858	0.00414041	0.00437138	0.00168443	0.00187321	0	0.00548119	0	0.00131271	0	0.000266208	0.000201553	0.00408918
95	Ig gamma-2 chain C region OS=Homo sapiens GN=IGHG2 PE=1 SV=2	IGHG2_HUMAN	36	7.66	Homo sapiens	0.00679968	0.00581113	0.00735319	0.00616642	0.00572625	0.00677329	0.0121023	0.0112667	0.00479395	0.00617095	0.00599328	0.00702137	0.00698469	0.00552293	0.00687974	0.0107154	0.00932	0.0159478	0.013172	0.0105511	0	0.00479532	0.00482718	0.00400347	0	0.00518591	0.00621006	0.00513676	0.00267861	0.000873842
96	Mannan-binding lectin serine protease 1 OS=Homo sapiens GN=MASP1 PE=1 SV=3	MASP1_HUMAN	79	5.18	Homo sapiens	0.00198153	0.00159899	0.0011823	0.00180706	0.00132476	0.000576462	0	0	0	0.000339735	0.000264348	0.00034914	0.000542375	0.000359866	0.000132671	0	0	0.000400588	0.000226003	0.000423396	0.00196906	0.000695749	0.00136368	0.000721174	0.000194652	0.00236245	0.00250814	0.00212696	0.00486048	0.00207726
97	Lipopolysaccharide-binding protein OS=Homo sapiens GN=LBP PE=1 SV=3	LBP_HUMAN	53	6.68	Homo sapiens	0.00208254	0.002309	0.00164216	0.00215016	0.0029352	0.00101311	0.000172077	0.00033031	0.000508958	0.0019881	0.00190976	0.00208726	0.00267185	0.00155068	0.00246635	0.000496408	0.00179517	0.00076789	0.00573832	0.00307524	0.00228909	0	0.00032935	0.00187143	0.000728484	0.000729975	0.000278096	0.000255531	0.00275887	0.00203865
98	Alpha-1-acid glycoprotein 1 OS=Homo sapiens GN=ORM1 PE=1 SV=1	A1AG1_HUMAN	24	4.66	Homo sapiens	0.00186656	0.00122459	0.00181154	0.0046036	0.00422153	0.00534041	0.0056442	0.00450512	0.00381516	0.003262	0.00435073	0.00395	0.00426056	0.00290665	0.00357411	0.00299373	0.00389126	0.00489888	0.00321035	0.00453408	0.00157174	0.00214128	0.00217515	0.0027579	0.00176982	0.002202	0.0024909	0.00224316	0.00167517	0.00396719
99	Glyceraldehyde-3-phosphate dehydrogenase OS=Homo sapiens GN=GAPDH PE=1 SV=3	G3P_HUMAN	36	8.73	Homo sapiens	0.00283591	0.000816394	0.00410223	0.000973358	0.00112759	0.0020626	0.000970515	0.00120905	0.00345447	0.00185083	0.00164155	0.0016848	0.00195692	0.00236938	0.00325335	0.00242229	0.00276542	0.00113003	0.00196714	0.00125299	0.00104427	0.00305972	0.00328445	0.00433942	0.0019309	0.00225084	0.00197256	0.00504556	0.0010205	0.00227141
100	Vinculin OS=Homo sapiens GN=VCL PE=1 SV=4	VINC_HUMAN	124	5.33	Homo sapiens	0.00126839	0.000159271	0.000945259	0	0	0.000331983	0	0	0	0.000399906	0.000112584	0.000529575	0.000412461	0.000967185	0.000554468	0.00120711	0.00068236	0.000145717	0	0	0.00080646	0.00153849	0.00126093	0.00177371	0.000777926	0.000483103	0.000478861	0.00157227	0	0.000619173
101	Keratin, type II cytoskeletal 6A OS=Homo sapiens GN=KRT6A PE=1 SV=3	K2C6A_HUMAN	60	8.16	Homo sapiens	0.000514778	0.00227391	0.00716846	0.00150327	0.00462543	0.00288445	0	0.00267863	0.00297528	0.00296178	0.00243455	0.00219501	0.00202899	0.00157941	0.00361347	0.00360052	0.00292669	0.00391846	0.00248728	0.00139754	0.00102917	0.00165263	0.000231727	0.00350676	0	0.00105745	0	0.000615986	0.000804104	0.000884254
102	Erythrocyte band 7 integral membrane protein OS=Homo sapiens GN=STOM PE=1 SV=3	STOM_HUMAN	32	8.07	Homo sapiens	0.00340098	0.000301183	0.00229111	0.00021264	0	0.00395883	0.00243751	0.00382438	0.00422258	0.00423265	0.00108944	0.00152057	0.00159259	0.00216487	0.00193612	0.00688471	0.00473858	0.00311194	0.00398504	0.0024399	0.000217967	0.00195869	0.00206161	0.0015047	0.00096667	0.00121168	0.00128414	0.0029391	0.000479022	0.00354564
103	Alpha-2-HS-glycoprotein OS=Homo sapiens GN=AHSG PE=1 SV=1	FETUA_HUMAN	39	5.52	Homo sapiens	0.00169651	0.00205807	0.00205473	0.00239996	0.00268623	0.0030532	0.00203241	0.00156994	0.00180145	0.00255753	0.00142698	0.00183921	0.00161231	0.00194365	0.00255518	0.00343177	0.00279696	0.00243147	0.00128703	0.00259988	0.000791666	0.00159957	0.000981773	0.000693819	0	0.00207684	0.00162759	0.00224303	0.00188198	0.00121907
104	Hemopexin OS=Homo sapiens GN=HPX PE=1 SV=2	HEMO_HUMAN	52	7.02	Homo sapiens	0.000635772	0.000303861	0.000965679	0.00227147	0.00188356	0.00166983	0.0025825	0.00223316	0.00291012	0.00268335	0.000805004	0.00107452	0.00128026	0.00114999	0.00145236	0.00179681	0.00190435	0.00225919	0.00153214	0.00140318	0.000193811	0.000423751	0.000602641	0.000864796	0.00066922	0.000745153	0.00121786	0.001423	0.00105233	0.000403312
105	Lumican OS=Homo sapiens GN=LUM PE=1 SV=2	LUM_HUMAN	38	6.6	Homo sapiens	0.00150778	0.00229738	0.00105716	0.00119257	0.000888556	0.000848519	0.00114266	0.00103182	0.000283203	0	0.00338603	0.00332373	0.00330038	0.00233454	0.00126456	0.000678508	0.000257661	0.00071768	0.00224481	0.00276474	0.00261475	0.00270086	0.00311444	0.00181855	0.00172559	0.00194537	0.00166991	0.0014147	0.00197318	0.00256743
106	Protein Z-dependent protease inhibitor OS=Homo sapiens GN=SERPINA10 PE=1 SV=1	ZPI_HUMAN	51	8.58	Homo sapiens	0.00269567	0.00259776	0.00263208	0.000815671	0.000661645	0	0	0.000186371	0	0	0.00177331	0.0015526	0.00169567	0.000986726	0.00121367	0	0	0.000175283	0	0.000219222	0.00268046	0.00057802	0.00157044	0.00141603	0.000456024	0.00186398	0.00197754	0.00244147	0.000472615	0.000308415
107	Alpha-1B-glycoprotein OS=Homo sapiens GN=A1BG PE=1 SV=4	A1BG_HUMAN	54	5.71	Homo sapiens	0.000433908	0.000470983	0.000693499	0.00192589	0.00168876	0.00176219	0.00194597	0.00153213	0.00200178	0.00176087	0.0018685	0.00146689	0.00152936	0.0011074	0.00114679	0.00201308	0.00148522	0.00217656	0.00144555	0.00191692	0.00123936	0.00102243	0.000966029	0.000720991	0	0.000716932	0.000829027	0.00186759	0.00102765	0.00136938
108	Phosphatidylcholine-sterol acyltransferase OS=Homo sapiens GN=LCAT PE=1 SV=1	LCAT_HUMAN	50	6.04	Homo sapiens	0.0010155	0.00123718	0.000939829	0.00360398	0.00304003	0.00206722	0.000961477	0.000855482	0.000215234	0.000649292	0.000483533	0.00138048	0.00149341	0.00258511	0.00186028	0.00123657	0.00188296	0.000539733	0.000434571	0.000381637	0.00222231	0.00125013	0.00180486	0.000242645	0.000231959	0.00148026	0.00082146	0.00127572	0.00174443	0.00300948
109	Complement component C7 OS=Homo sapiens GN=C7 PE=1 SV=2	CO7_HUMAN	94	6.44	Homo sapiens	7.76931e-05	0.000237871	0.00014509	0.000178352	0.000144137	0.000395886	0.000785102	0.000505601	0.000286966	0.000773004	0.00099875	0.00132871	0.00108645	0.00107928	0.00135507	0.000440653	0.000400612	0.000528474	0.000410334	0.000573232	0.00160673	0.0014841	0.00144409	0.00200914	0.00106903	0	0	0	0	0
110	Apolipoprotein F OS=Homo sapiens GN=APOF PE=1 SV=2	APOF_HUMAN	35	5.36	Homo sapiens	0.00255985	0.00258218	0.00172167	0.00248334	0.00154385	0.00153058	0.00125352	0.00106486	0	0	0.00268287	0.0019332	0.00247393	0.00361713	0.00285093	0.00148022	0.00175364	0.000643962	0.00132343	0	0.0018348	0.00104718	0.00129074	0.00205882	0.00253799	0.0022149	0.00224203	0.0024989	0.0025537	0.00119841
111	Haptoglobin-related protein OS=Homo sapiens GN=HPR PE=2 SV=2	HPTR_HUMAN	39	7.11	Homo sapiens	0.00376754	0.00341924	0.00419544	0.00730332	0.00745086	0.00594627	0.00932038	0.00699901	0.00706601	0.00820496	0	0.00223253	0.00411756	0.00299075	0.00520756	0.00569379	0.00688434	0.00707294	0.00470329	0.00439385	0.00456787	0.00432409	0.0057089	0.00632108	0.00682784	0.00316318	0.00468954	0.00456955	0.00431495	0.00385991
112	Multimerin-1 OS=Homo sapiens GN=MMRN1 PE=1 SV=3	MMRN1_HUMAN	138	8.01	Homo sapiens	0.000847224	0.000171747	0.00068045	0	0	0.00012249	0	5.79822e-05	0	0	0.000756648	0.000611626	0.000851714	0.000802731	0.00119507	0	0.000138325	0	0	0	5.05432e-05	0.000770156	0.000528704	0.000783383	0.000364803	0.000459577	0.00021361	0.000900599	0	0.000420641
113	Beta-Ala-His dipeptidase OS=Homo sapiens GN=CNDP1 PE=1 SV=4	CNDP1_HUMAN	57	4.95	Homo sapiens	0	0	0	0.00218943	0.0016594	0.00158007	0.00306946	0.00203731	0.000289134	0	0	0	0	0	0	0.000907498	0.00257437	0.0021411	0.000118195	0	0	0.000255983	0.000245257	0	0	0.00160643	0.00346946	0.00182914	0.00322265	0.00412349
114	Amyloid beta A4 protein OS=Homo sapiens GN=APP PE=1 SV=3	A4_HUMAN	87	4.45	Homo sapiens	0	0	0	0	0	0.00128322	0.00178991	0.0013161	0.000929354	0.00103759	0.0018003	0.00146705	0.00121987	0.00185183	0.00106762	0.00188855	0.00152352	0.000571889	0.00111256	0.000219331	0	0	0	0	0	0	0	0	0	0
115	Endoplasmin OS=Homo sapiens GN=HSP90B1 PE=1 SV=1	ENPL_HUMAN	92	4.48	Homo sapiens	0.000838245	0.000801146	0.000911511	0.000145248	0.000184148	0.00012889	0.000237999	0.00013046	0	0.000235848	0.000719426	0.000784815	0.000469494	0.00127153	0.000895359	0.000175303	0.000106425	0	0.000314906	0.000450462	0.000261175	0.000838834	0.00049175	0.000685948	0.000167147	0.000613131	0.000688778	0.000474015	0.000685207	0.00195267
116	Tubulin beta-4B chain OS=Homo sapiens GN=TUBB4B PE=1 SV=1	TBB4B_HUMAN	50	4.52	Homo sapiens	0.00330775	0.00233376	0.00308644	0	0	0.00140104	0.00148503	0.000665384	0.000856807	0.000765098	0.000282937	0.000244029	0.000705943	0.000950681	0.000755815	0.00309546	0.00180003	0	0.000636685	0	0.00169774	0.0026437	0.00166941	0.00336718	0.000229366	0.00154992	0.00141102	0.00423501	0	0.00327208
117	Complement component C8 alpha chain OS=Homo sapiens GN=C8A PE=1 SV=2	CO8A_HUMAN	65	6.41	Homo sapiens	0.000452774	0.000695245	0.000511139	0.000427649	0.00025915	0.000635238	0.00053056	0.000146229	0.000665077	0.000850713	0.00150047	0.00164299	0.00192218	0.00121158	0.00153456	0	0.000876953	0.000695489	0.000445714	0.000772597	0.00152451	0.00186489	0.00192553	0.00203252	0.00106989	0.000542203	0.000401203	0.000413398	0	0.000163247
118	Alpha-2-antiplasmin OS=Homo sapiens GN=SERPINF2 PE=1 SV=3	A2AP_HUMAN	55	6.24	Homo sapiens	0	0.000143693	0.000127801	0.00195049	0.00184231	0.000976271	0.00207304	0.00124723	0.00206433	0.0020343	0.000947883	0.000712039	0.0009266	0.00201085	0.00118881	0.00074647	0.00136488	0.00172657	0.00125563	0.00156844	0.00018324	0	0.000254175	0.000766268	0.000280706	0	0	0	0.000353602	0.000190657
119	Tubulin alpha-4A chain OS=Homo sapiens GN=TUBA4A PE=1 SV=1	TBA4A_HUMAN	50	4.69	Homo sapiens	0.00176103	0.00127188	0.00201119	0	0	0.00113856	0.000437919	0.000499038	0.000865633	0.00120226	0	0	0	0.000633851	0.000139747	0.00360863	0.00103684	0	0.000202114	0	0.00106464	0.00249729	0.00194607	0.00210367	0.00062101	0.000775553	0.00119602	0.00363335	0.000138637	0.00242606
120	Keratin, type II cytoskeletal 5 OS=Homo sapiens GN=KRT5 PE=1 SV=3	K2C5_HUMAN	62	7.91	Homo sapiens	0.00119687	0.00217888	0.00399893	0.00173226	0.00289164	0.00291891	0.00189944	0.00253472	0.00226535	0.00269649	0.00224373	0.00185035	0.00190133	0.00147583	0.00260763	0.0029923	0.00290726	0.00437764	0.00215709	0.00316832	0.000945915	0.00142003	0.00106738	0.00213502	0	0.00107933	0.000355654	0.000596116	0.000391314	0.0020952
121	Complement component C8 beta chain OS=Homo sapiens GN=C8B PE=1 SV=3	CO8B_HUMAN	67	8.17	Homo sapiens	0.000109002	0.000569562	0.000499013	0.00010156	0	0.000740563	0.000593512	0.000391935	0.000565684	0.000331082	0.00160847	0.00147917	0.00169888	0.00151181	0.000823788	0.000612774	0.000777309	0.000405948	0.000100554	0.000250306	0.00102574	0.00104035	0.00161019	0.00238001	0.000922554	0.000630961	0	0	0.0013352	0.00039407
122	14-3-3 protein zeta/delta OS=Homo sapiens GN=YWHAZ PE=1 SV=1	1433Z_HUMAN	28	4.43	Homo sapiens	0.00312297	0.00255366	0.00354817	0	0	0.00207391	0	0.00137348	0	0.00182016	0.0018646	0.00244928	0.00182595	0.0014649	0.00159817	0.00476979	0.00152888	0.000326055	0	0	0.00170257	0.00368129	0.00434817	0.00236608	0.00179422	0.00138371	0.00173078	0.00347899	0	0.00113624
123	Tubulin beta-1 chain OS=Homo sapiens GN=TUBB1 PE=1 SV=1	TBB1_HUMAN	50	4.82	Homo sapiens	0.00213054	0.0010176	0.00188386	0	0	0.00106297	0.000164317	0.000332692	0.000219742	0.000699486	0	0.000334848	0.00016157	0.00145401	0.000412844	0.00308244	0.00113968	0.00045492	0.000289714	0.000296906	0.000614938	0.00227991	0.00187861	0.00269877	0.000386709	0.00091507	0.000521177	0.00342572	0	0.00179439
124	Complement C1q subcomponent subunit C OS=Homo sapiens GN=C1QC PE=1 SV=3	C1QC_HUMAN	26	8.58	Homo sapiens	0.00110184	0.000455632	0.00102364	0.00106912	0.000908856	0.00428905	0.00186282	0.00183257	0.00270416	0.003679	0.00508265	0.00390664	0.00483135	0.00206757	0.00264326	0.00237493	0.00417579	0.00209202	0.00154187	0.00150148	0	0.000286307	0.00107013	0.00126413	0	0.00189569	0.00359558	0.000770072	0.00125001	0.00335629
125	Complement C1q subcomponent subunit B OS=Homo sapiens GN=C1QB PE=1 SV=3	C1QB_HUMAN	27	8.87	Homo sapiens	0.000982946	0.00141326	0.000743931	0	0	0.00321596	0.00161162	0.00314778	0.00339543	0.00223842	0.00476553	0.00326727	0.00406818	0.000816846	0.00241572	0.000748245	0.00296162	0.00151022	0.00160952	0.00494407	0.00088993	0.000549549	0.000260289	0.00110568	0.000858178	0.0011744	0.00317856	0.00162314	0.000510542	0.00274339
126	Spectrin alpha chain, erythrocytic 1 OS=Homo sapiens GN=SPTA1 PE=1 SV=5	SPTA1_HUMAN	280	4.69	Homo sapiens	0	0	0	0	0	0.000455007	0	0	0.000926693	0.00164219	0	0	0	0	0	0.000534578	0.00143416	0.000839052	2.40612e-05	0	0	0	0	0	0	0	0	0	2.47566e-05	0.00011369
127	Complement factor I OS=Homo sapiens GN=CFI PE=1 SV=2	CFAI_HUMAN	66	7.53	Homo sapiens	0.00286056	0.00354918	0.0024266	0.000215777	0	0.000503949	0.000398039	0.000325867	0	0.000180308	0.000421038	0.000363465	0.000417924	0.000148324	0.000519653	0	0.000574441	0.000684101	0.000153117	0	0	0.000109049	0.000211812	0	0	0.00160062	0.00197697	0.00178424	0.00188808	0.000399094
128	Angiotensinogen OS=Homo sapiens GN=AGT PE=1 SV=1	ANGT_HUMAN	53	6.27	Homo sapiens	0	0.000719961	0.000254278	0.00111182	0.00102074	0.00171525	0.00396887	0.00172027	0.000404154	0.00189722	0.000786638	0.000674455	0.000520433	0.000949491	0.0011014	0.00126263	0.000977981	0.00136614	0.00114728	0.00063285	0.00147487	0.000555262	0	0.000508115	0.000366451	0.000532151	0.000844669	0.000635394	0.00160868	0.00104586
129	Properdin OS=Homo sapiens GN=CFP PE=1 SV=2	PROP_HUMAN	51	7.92	Homo sapiens	0.000173888	0.000154855	0.000586654	0.00251131	0.00231921	0	0	0	0.000215433	0.000335761	0.00245942	0.00168598	0.00184372	0.00241278	0.00249815	0.000196488	0	0	0	0	0.000805515	0.00150979	0.00102285	0.00159052	0.000680046	0	0	0	0	0
130	Secreted phosphoprotein 24 OS=Homo sapiens GN=SPP2 PE=1 SV=1	SPP24_HUMAN	24	8.46	Homo sapiens	0.00174702	0.00179082	0.00125538	0.00289664	0.00281599	0.00208499	0.00271768	0.00236315	0.00359566	0.00510388	0.00362406	0.00312118	0.00261318	0.00343747	0.00300366	0.00409332	0.00236406	0.00169504	0.00148786	0.00131733	0	0.000308077	0.00188232	0.00100028	0	0.00161557	0.00139898	0.000281453	0.00303099	0.00198176
131	Extracellular superoxide dismutase [Cu-Zn] OS=Homo sapiens GN=SOD3 PE=1 SV=2	SODE_HUMAN	26	6.59	Homo sapiens	0.00237422	0.00207533	0.00194254	0.00302787	0.00233758	0.00223344	0	0.000365573	0.00147036	0.00170951	0.00227002	0.00187147	0.00242547	0.0030231	0.00304637	0.00179681	0.00290588	0.000348142	0.000388681	0	0.000785098	0.00127696	0.00360854	0.00127667	0.000591443	0.00243914	0.00430039	0.000646767	0.000266609	0.00182861
132	Thrombospondin-4 OS=Homo sapiens GN=THBS4 PE=1 SV=2	TSP4_HUMAN	106	4.23	Homo sapiens	0.00112247	0.00110901	0.000976655	0.00108221	0.000988129	0.000189969	0	8.96689e-05	0	0	0	0	0	0.00059511	0.000193229	0.000285886	0	0.000596941	0.000527546	0.000438312	0.000355866	0.000312744	0.00101705	0	0	0.000399095	0.000705804	9.55877e-05	0.00176057	0.00152244
133	Band 3 anion transport protein OS=Homo sapiens GN=SLC4A1 PE=1 SV=3	B3AT_HUMAN	102	4.84	Homo sapiens	0	7.74276e-05	0	0	0	0.000853726	0.000346058	0.000789019	0.00185678	0.00350112	0.00020474	0.000190956	0.000113444	0.000495037	0.000438361	0.00181727	0.00171415	0.00181575	0.000279075	0.000145542	0	0	0	0	0	0.000207247	0	0	0.000285037	0.00030964
134	Myosin light polypeptide 6 OS=Homo sapiens GN=MYL6 PE=1 SV=2	MYL6_HUMAN	17	4.29	Homo sapiens	0.00609625	0.00294159	0.00314348	0	0	0.00267886	0	0.00207109	0.0012926	0.00231213	0.00122844	0.00166428	0.00138493	0.00277771	0.000399888	0.00423591	0.0033375	0.001338	0.0023284	0.000986501	0.00120074	0.00474252	0.00429567	0.00742616	0.00568117	0.00269313	0.00197504	0.00653131	0.00142017	0.00840112
135	Histone H4 OS=Homo sapiens GN=HIST1H4A PE=1 SV=2	H4_HUMAN	11	11.91	Homo sapiens	0	0	0.00211909	0	0	0.00752307	0.0119823	0.00742432	0.0112897	0.0105948	0.00727084	0.00606765	0.00535252	0.00543718	0.00249457	0.0135742	0.0120272	0.0057488	0.0128299	0.00771914	0.000634087	0	0	0	0	0	0	0	0	0
136	Integrin-linked protein kinase OS=Homo sapiens GN=ILK PE=1 SV=2	ILK_HUMAN	51	8.18	Homo sapiens	0.00119504	0.000653652	0.000653981	0	0	0.000469899	0	0.000156893	0	0	0	0.000506359	0.000389584	0.000919768	0.000473123	0.00262028	0.000829536	0.000797666	0	0	0.0013351	0.00194669	0.00156895	0.00164768	0	0.000414494	0.000289002	0.00164871	0	0.000311728
137	Pleckstrin OS=Homo sapiens GN=PLEK PE=1 SV=3	PLEK_HUMAN	40	8.45	Homo sapiens	0.00187417	0.00176574	0.0018454	0	0	0.00113108	0	0	0.000269043	0.00125994	0	0.000215202	0.000290665	0.00125855	0.000946401	0.00436726	0.000831163	0.000223486	0	0	0.00166994	0.0034889	0.00200054	0.00353724	0.00106774	0	0	0.00210142	0	0
138	Immunoglobulin J chain OS=Homo sapiens GN=IGJ PE=1 SV=4	IGJ_HUMAN	18	4.87	Homo sapiens	0.0022424	0.00185217	0.00224794	0.00115553	0.00131279	0.00229391	0.00294407	0.00483608	0.00388148	0.00308548	0.00212808	0.00221185	0.00260585	0.00139865	0.00267651	0.00313626	0.00315208	0.0020139	0.00136619	0.00417133	0.00132066	0.00265511	0.00328641	0.00317231	0.00171202	0.00156547	0.00228291	0.00168232	0.00123231	0.00147273
139	78 kDa glucose-regulated protein OS=Homo sapiens GN=HSPA5 PE=1 SV=2	GRP78_HUMAN	72	4.8	Homo sapiens	0.00080664	0.000133859	0.000604515	0	0	0.000231313	0	0.000298711	0	0	0.000436368	0.000443276	0.000268622	0.000392613	9.5233e-05	0.000358101	0.000265122	0	0	0	0.00156996	0.00214845	0.0016896	0.00133477	0.00101974	0.000489433	0.000466328	0.000793554	9.62756e-05	0
140	Phosphatidylinositol-glycan-specific phospholipase D OS=Homo sapiens GN=GPLD1 PE=1 SV=3	PHLD_HUMAN	92	6.33	Homo sapiens	0	0	0	0.000182229	7.30535e-05	0	0.000713875	0.000377962	0	0	0	0	0	0	0	0	0	0.000590612	0	0	0	0	0	0	0	0.00260411	0.00315896	0.0024099	0.00170451	0.000459313
141	Fermitin family homolog 3 OS=Homo sapiens GN=FERMT3 PE=1 SV=1	URP2_HUMAN	76	6.98	Homo sapiens	0.000192188	0.000363779	0.000482338	0	0	0.000333624	0	0.000113593	0.00021685	0.000894813	9.10934e-05	0.000276927	0.000305478	0.0014511	0.000678161	0.00196575	0.00068561	0.000117624	8.86465e-05	0	0	0.000578575	0.000777431	0.00170038	0.000251498	0.000370768	0	0.00155049	0	0.000279238
142	Ficolin-3 OS=Homo sapiens GN=FCN3 PE=1 SV=2	FCN3_HUMAN	33	6.66	Homo sapiens	0.00067052	0.000292056	0	0.000846068	0.000921354	0.0008768	0	0.000242471	0	0	0	0	0	0	0	0	0	0	0.000234805	0	0.000422725	0	0.000419346	0.00081698	0	0.00661798	0.00486002	0.00468276	0.00726661	0.00584166
143	Complement factor H-related protein 5 OS=Homo sapiens GN=CFHR5 PE=1 SV=1	FHR5_HUMAN	64	7.08	Homo sapiens	0.000137887	0	0.000109829	0	0	0	0	0	0	0	0.00391302	0.00292411	0.00354737	0.00118975	0.00118392	0.000156577	0	0	0	0	0.000213965	0.000228769	0.00010981	9.22971e-05	0	0	0	0.000368294	0	0
144	Spectrin beta chain, erythrocytic OS=Homo sapiens GN=SPTB PE=1 SV=5	SPTB1_HUMAN	246	4.92	Homo sapiens	0	0	0	0	0	0.00038491	0	3.50937e-05	0.000550825	0.00154548	0	0	0	0	0	0.000603173	0.000901656	0.000806924	2.73867e-05	0	0	0	0	0	0	0	0	0	0	0.000107836
145	Platelet basic protein OS=Homo sapiens GN=PPBP PE=1 SV=3	CXCL7_HUMAN	14	9.07	Homo sapiens	0.0105062	0.00238116	0.00934069	0	0	0.00114711	0.000586846	0.00215288	0.00306002	0.00485756	0.00273073	0.00248774	0.00307356	0.00204219	0.00319377	0.00149526	0.00099618	0	0	0	0	0.00104222	0.00323188	0.00282266	0.00359153	0.000504917	0.00293517	0.00456362	0	0.000757932
146	Fibulin-1 OS=Homo sapiens GN=FBLN1 PE=1 SV=4	FBLN1_HUMAN	77	4.86	Homo sapiens	0	0	0	0	0.000527878	0.000322193	0.000334101	0.000725245	0.000838942	0.000788047	0.000134866	0.000273331	0.000205579	0.000490314	0	0.000262372	0.00116897	0.000881775	0.000419999	0.000393015	0.000489894	0.000525278	0	0.000430196	0.000902922	0.000869455	0.000583308	0.000478984	0.0008902	0
147	Keratin, type I cytoskeletal 17 OS=Homo sapiens GN=KRT17 PE=1 SV=2	K1C17_HUMAN	48	4.67	Homo sapiens	0	0.000987547	0.00639039	0.000478211	0.00310472	0.00283648	0	0.000566811	0.000572244	0.00258565	0.000430436	0.000782571	0.00147187	0	0.00193262	0.00247943	0.00227235	0.00376804	0.00197214	0.0018977	0.000629887	0	0	0.00275979	0	0	0	0	0	0.000994786
148	Ig kappa chain V-III region HAH OS=Homo sapiens PE=2 SV=1	KV312_HUMAN	14	8.18	Homo sapiens	0.00141282	0.0020993	0.00163502	0.0011975	0.00217097	0.00294932	0.00531032	0.00401998	0.00307612	0.00195168	0.00372254	0.00378302	0.00223403	0.00158686	0.00269049	0.00516971	0.00677838	0.00387037	0.00251449	0.00204448	0.000479914	0.00526053	0.00149587	0.00343659	0.00109839	0.00126172	0.00134408	0.000956312	0.000489485	0.000757932
149	Protein S100-A9 OS=Homo sapiens GN=S100A9 PE=1 SV=1	S10A9_HUMAN	13	6.07	Homo sapiens	0	0	0.0105453	0.00159997	0.00103895	0.00347066	0.00369799	0.00201073	0.00623216	0.00908931	0.003744	0.00276792	0.0051127	0.00315444	0.00239409	0.000783208	0.00259811	0.00277385	0.00308373	0.00300296	0	0	0	0	0	0	0	0	0	0.00203917
150	Alpha-1-acid glycoprotein 2 OS=Homo sapiens GN=ORM2 PE=1 SV=2	A1AG2_HUMAN	24	4.76	Homo sapiens	0.000551547	0.000658135	0.000816066	0.00362154	0.00267151	0.00396493	0.00475843	0.00288456	0.00180771	0.00352345	0.00377844	0.00214015	0.0024517	0.00196794	0.000849762	0.00125261	0.0021285	0.00301527	0.0013475	0.000931695	0.00269177	0.000599767	0.000430413	0.0017494	0.00064944	0.0016145	0.00047779	0.00126174	0.00170569	0.00308294
151	Ras-related protein Rap-1b OS=Homo sapiens GN=RAP1B PE=1 SV=1	RAP1B_HUMAN	21	5.39	Homo sapiens	0.00241785	0.00261103	0.00269209	0	0	0.000981292	0	0	0	0.00239988	0.000327951	0.00100221	0.00169037	0.00360963	0.00213089	0.00173002	0	0	0	0	0.00259029	0.00332859	0.00281537	0.00330155	0.00202119	0.00201448	0.00142291	0.00336278	0	0.00100463
152	Complement component C8 gamma chain OS=Homo sapiens GN=C8G PE=1 SV=3	CO8G_HUMAN	22	8.48	Homo sapiens	0.000497942	0	0.00077968	0	0	0.00115252	0.00082067	0.00151224	0.000499413	0.000986272	0.00411086	0.00311591	0.00356199	0.00228828	0.00313215	0.000488724	0	0.000406337	0.00045935	0	0.00295952	0.00333639	0.00347466	0.0038241	0.00140746	0	0	0	0	0.000476641
153	Ankyrin-1 OS=Homo sapiens GN=ANK1 PE=1 SV=3	ANK1_HUMAN	206	5.92	Homo sapiens	0	0	0	0	0	0.000457836	0	4.61403e-05	0.000628219	0.0011694	0	0	0	0	0	0.00114677	0.000801311	0.000876901	0	0	0	0	0	0	0	0	0	0	3.36497e-05	5.151e-05
154	Protein S100-A8 OS=Homo sapiens GN=S100A8 PE=1 SV=1	S10A8_HUMAN	11	7.07	Homo sapiens	0	0	0.0127894	0.00123718	0.00153629	0.000741304	0.00112034	0.00243373	0.00540775	0.00711708	0.00475308	0.00382496	0.00605381	0.00231802	0.00500308	0.00138841	0.00257897	0.00163556	0	0	0	0	0	0	0	0	0	0	0	0
155	Ig heavy chain V-III region 23 OS=Homo sapiens GN=IGHV3-23 PE=1 SV=2	HV303_HUMAN	13	8.46	Homo sapiens	0.000842671	0.00121544	0.000540697	0.000523422	0.00233797	0.00319907	0.00473604	0.00298256	0.00249287	0.00294269	0.0018727	0.00245507	0.00151578	0.00217447	0.0034417	0.00356549	0.00364921	0.00487468	0.00141231	0	0.00236515	0.00282881	0.00241307	0.00233313	0	0.00108234	0.000588049	0.00104178	0.00229583	0.00202617
156	Cofilin-1 OS=Homo sapiens GN=CFL1 PE=1 SV=3	COF1_HUMAN	19	8.29	Homo sapiens	0.00178005	0	0.00282789	0	0	0.00130573	0	0	0.00198613	0	0.00439557	0.00514529	0.00453139	0.00332757	0.00615119	0.00292618	0	0	0	0	0	0.00153854	0.000918712	0.000314081	0	0	0	0.00300308	0	0.000558476
157	Profilin-1 OS=Homo sapiens GN=PFN1 PE=1 SV=2	PROF1_HUMAN	15	8.46	Homo sapiens	0.00303867	0	0.00247722	0	0	0.00140194	0.000547723	0.00265102	0.000710563	0	0.00046154	0.0026858	0.00208509	0.00315882	0.00229278	0.0058135	0.00252695	0.000595962	0	0.000989687	0	0.00317624	0.00185236	0.00158327	0	0.00234757	0.00125448	0.00449305	0	0.000699074
158	Collectin-11 OS=Homo sapiens GN=COLEC11 PE=1 SV=1	COL11_HUMAN	29	5.06	Homo sapiens	0.0038255	0.00307018	0.00289169	0.000947621	0.00104844	0	0	0	0	0	0	0	0	0	0	0	0	0	0.000499507	0.000385529	0.00210741	0.00177548	0.00203741	0.000826778	0	0.00340005	0.00231115	0.00219952	0.00279523	0.000542385
159	Afamin OS=Homo sapiens GN=AFM PE=1 SV=1	AFAM_HUMAN	69	5.7	Homo sapiens	0	0	0	0.000796551	0.000538212	0.00089095	0.00133777	0.000807589	0.00023395	0.000314464	0	0.000105018	0.000287419	0.00045945	0	0.000595012	0.000336615	0.000129557	9.76396e-05	0.000653731	0.000101086	0.000319348	0	0	0	0	0	0.000194519	0.000121694	0
160	Serum amyloid P-component OS=Homo sapiens GN=APCS PE=1 SV=2	SAMP_HUMAN	25	6.52	Homo sapiens	0	0	0	0.00207996	0.00189127	0.00116734	0.00192295	0.00101071	0.000426338	0.00109624	0	0.000325373	0.000941749	0	0.00096165	0.00165685	0.0015063	0	0.000269485	0	0.00287825	0.00279802	0.000699741	0.00252671	0.0010827	0.000280381	0.000295556	0	0	0
161	Platelet glycoprotein IX OS=Homo sapiens GN=GP9 PE=1 SV=3	GPIX_HUMAN	19	6.32	Homo sapiens	0.00363331	0.000415954	0.00245368	0	0	0.00196515	0	0.000454371	0.00114467	0	0.000372285	0.000906116	0.00040601	0.00165156	0.00109296	0.00350708	0.00274197	0	0	0	0	0.00289935	0.00128316	0.00173664	0.000402397	0.00203916	0.00295298	0.00371995	0	0.00166885
162	Selenoprotein P OS=Homo sapiens GN=SEPP1 PE=1 SV=3	SEPP1_HUMAN	43	7.92	Homo sapiens	0	0	0	0.000967424	0.00110033	0.000494843	0.00100979	0.000911843	0	0	0.000808995	0.000252777	0.000727357	0.000585262	0.000399639	0.000483089	0	0	0.000426976	0.000443763	0.000243312	0.000512442	0.000646173	0.000425512	0	0.000655311	0.000520552	0.000314957	0.000517687	0
163	Coagulation factor XIII A chain OS=Homo sapiens GN=F13A1 PE=1 SV=4	F13A_HUMAN	83	5.95	Homo sapiens	0.000194312	0	0.000155366	0.000297724	0.000366577	0.000142866	0	0	0.000585051	0.00109443	0	0.000201716	9.33863e-05	0.000305036	8.19048e-05	0.000548146	0.000344978	0.000273579	0	0	0	0.000265482	0	0.000363148	0.000464807	0	0	0.000810131	0.00045193	0.000191766
164	Apolipoprotein C-IV OS=Homo sapiens GN=APOC4 PE=1 SV=1	APOC4_HUMAN	15	9.13	Homo sapiens	0	0	0	0.00466391	0.00495721	0.0038796	0.00348496	0.00193018	0.00469127	0.00736735	0	0	0	0.00253717	0	0.00235429	0.00251109	0.00270947	0	0.00226181	0	0	0	0.00160703	0	0	0	0	0	0.000707404
165	Platelet glycoprotein Ib alpha chain OS=Homo sapiens GN=GP1BA PE=1 SV=2	GP1BA_HUMAN	72	6.24	Homo sapiens	0.000184756	0	9.17967e-05	0	0	0.000570019	0.000604358	0.000231036	0	0	0.000290049	0.000239114	0.000322449	0.000701038	0.000192279	0.000139179	0	0	0	0	0.000380382	0.000615163	0.000531794	0.000584923	0.00010824	0.000342633	0.000310885	0.000746877	0	0.000659464
166	Keratin, type I cytoskeletal 14 OS=Homo sapiens GN=KRT14 PE=1 SV=4	K1C14_HUMAN	52	4.81	Homo sapiens	0	0.00194739	0.00533959	0.00178624	0.0043644	0.00144423	0.00156243	0	0	0.00509499	0.001683	0.00191403	0.00100981	0	0.00212986	0.00576248	0.00294715	0.00582335	0.00320357	0	0	0	0	0.00386595	0	0	0	0	0	0
167	Plasma kallikrein OS=Homo sapiens GN=KLKB1 PE=1 SV=1	KLKB1_HUMAN	71	8.26	Homo sapiens	0	0	0	0.000778566	0.000666239	0.000524131	0.000981573	0.000593558	0.00068466	0.00109923	0	0.000223301	0.000331602	0.000400414	0.000244194	0.000724539	0.000468511	0.000763962	0.000142334	0.000209089	0	0	9.79129e-05	0	0	0.000297735	0.000104069	0.000379553	0	0
168	Pyruvate kinase PKM OS=Homo sapiens GN=PKM PE=1 SV=4	KPYM_HUMAN	58	7.94	Homo sapiens	0.000457203	0.000136261	0.000857151	0	0	0	0	0.000137958	0	0	0	0.000148415	0.000133639	0.000977544	0.000117209	0.00150841	0	0	0	0	0	0.00025157	0.000241028	0.000517456	0.000599773	0.000304484	0	0.00162604	0	0.000365898
169	Fructose-bisphosphate aldolase A OS=Homo sapiens GN=ALDOA PE=1 SV=2	ALDOA_HUMAN	39	8.2	Homo sapiens	0.000680501	0	0.00188526	0	0	0	0.000210663	0.000243715	0.000273293	0	0.000354104	0.00114867	0.000508511	0.000816519	0.000354977	0.0022339	0.00109743	0	0.000172747	0	0	0.000375415	0	0	0	0	0.000188466	0.000520891	0	0
170	Lactotransferrin OS=Homo sapiens GN=LTF PE=1 SV=6	TRFL_HUMAN	78	8.17	Homo sapiens	0	0	0	0	0	0	0.000556681	0.000563611	0.00249076	0.00173336	0.000401606	0.000156429	0.000556098	7.97802e-05	0	0.000256946	0.00103162	0	0	0	0	0	0	0	0	0	0	0	0	0
171	Neutrophil defensin 1 OS=Homo sapiens GN=DEFA1 PE=1 SV=1	DEF1_HUMAN	10	7.04	Homo sapiens	0	0	0.00134768	0.00207996	0.00202698	0.00287615	0.00269894	0.00392092	0.00539401	0.0089946	0.00312501	0.00194477	0.00353156	0.00189529	0.00136549	0.00263096	0.00428087	0.00362112	0.00217285	0.00316158	0.00136937	0	0.00208662	0	0	0.00140704	0	0	0	0.00159166
172	Clathrin heavy chain 1 OS=Homo sapiens GN=CLTC PE=1 SV=5	CLH1_HUMAN	192	5.42	Homo sapiens	5.70559e-05	0	0.000157344	0	0	4.11731e-05	0	0	0	0	0	0	0	0	0	0.000187318	0.000147846	0	0	0	0	0.000153406	0.000108678	9.43105e-05	0	0	0	0.000245845	0	0
173	Integrin alpha-M OS=Homo sapiens GN=ITGAM PE=1 SV=2	ITAM_HUMAN	127	7.24	Homo sapiens	0	0	0	0	0	0.000220803	0.000270087	0.000630252	0.00119195	0.00175817	0	0	0	0	0	0.000567011	0.000556636	0	0.000285151	8.80342e-05	0	0	0	0	0	0	0	0	0	0
174	N-acetylmuramoyl-L-alanine amidase OS=Homo sapiens GN=PGLYRP2 PE=1 SV=1	PGRP2_HUMAN	62	7.59	Homo sapiens	0.000142335	0.000488114	0.000326051	0.000338592	0.000381654	0.000529656	0	0	0.000177211	0	0	0.00013884	0.000255315	0.000255355	0.000497882	0.000173418	0	0	0.000287972	0	0	0.00023932	0	0.000144376	0.000248024	0	0.000178764	0.000109489	0.000757707	0.000169131
175	Integrin beta-1 OS=Homo sapiens GN=ITGB1 PE=1 SV=2	ITB1_HUMAN	88	5.04	Homo sapiens	0.000426319	0	0.000148376	0	0	0.000514126	0.000349295	0	0.00018728	0.000840409	0	0.000146729	0	0.000430748	0.000157319	0.00111221	0.000539189	0.000101584	0	0	0	0.000333587	0.000513361	6.7813e-05	0	0.000240218	0.000213831	0.000457681	0	0.00012058
176	Myeloperoxidase OS=Homo sapiens GN=MPO PE=1 SV=1	PERM_HUMAN	84	9.14	Homo sapiens	0	0	0	0	0	0	0.00156483	0.000604472	0.00179368	0.00253192	0	0	0	0	0	0.000865012	0.000675446	0	0	0	0	0	0	0	0	0	0	0	0	0
177	Cholesteryl ester transfer protein OS=Homo sapiens GN=CETP PE=1 SV=2	CETP_HUMAN	55	6.02	Homo sapiens	0	0	0.000117231	0.000696728	0.000922327	0	0	0.000172816	0.000590333	0.000714659	0	0.000304407	0.00028781	0.000632453	0.000438834	0.000182198	0.000337774	0	0.000719687	0.000304918	0	0.000135345	0	0.000327987	0	0	0	0	0.000466317	0
178	Cartilage acidic protein 1 OS=Homo sapiens GN=CRTAC1 PE=1 SV=2	CRAC1_HUMAN	71	4.73	Homo sapiens	0.000754936	0.000772236	0.000516306	0	0	0	0	0	0	0	0	0	0	0	0	0	0	0	0	0	0	0.000104845	0.000148475	0	0	0.00153834	0.00131074	0.000758251	0.000759291	0
179	CD44 antigen OS=Homo sapiens GN=CD44 PE=1 SV=3	CD44_HUMAN	82	5	Homo sapiens	0.000403438	0.000572264	0.000199533	0	0	0.000195849	0.000374853	0.000221194	0	0	0.000167975	0.000104977	9.85181e-05	0.000151312	8.36192e-05	0.000377495	0.00023279	0	0.000264982	0	0.000207965	0.000178551	0.000168761	0.000147955	0	0.000172215	0.00036464	8.23764e-05	0.000102401	0
180	Ig mu heavy chain disease protein OS=Homo sapiens PE=1 SV=1	MUCB_HUMAN	43	4.89	Homo sapiens	0.00286254	0.00321524	0.00146021	0	0	0	0	0	0.0120599	0	0	0	0.00314678	0.00144718	0.00456269	0.00279653	0.0017265	0	0	0	0	0	0.00288276	0	0.0101418	0	0	0	0	0
181	Heat shock cognate 71 kDa protein OS=Homo sapiens GN=HSPA8 PE=1 SV=1	HSP7C_HUMAN	71	5.16	Homo sapiens	0.00104485	0.000166851	0.00113047	0	0	0	0	0	0	0.00024118	0	0	0	0.000531615	0	0	0.000206855	0	0	0	0	0.000517598	0.000441447	0.000167247	0	0.00059547	0.000311389	0.00108914	0	0.000298903
182	Glucosidase 2 subunit beta OS=Homo sapiens GN=PRKCSH PE=1 SV=2	GLU2B_HUMAN	59	4.05	Homo sapiens	0	0.000297305	0.000275948	0	0	0.00119447	0.000536307	0	0	0	0	0.000122818	0	0.000534429	0	0	0.000550955	0	0.000228377	0.000323421	0	0	0	0.000201264	0	0.000358291	0	0.000398194	0.000492107	0.00116447
183	Serum deprivation-response protein OS=Homo sapiens GN=SDPR PE=1 SV=3	SDPR_HUMAN	47	4.88	Homo sapiens	0.000858793	0.000336186	0.000703454	0	0	0.000168197	0	0	0	0.000253199	0	0	0	0.000264397	0.000148667	0.000441975	0	0	0	0.000315857	0	0.000860561	0.000738511	0.00121703	0.000162671	0	0.000162652	0.000999364	0	0.00112578
184	WD repeat-containing protein 1 OS=Homo sapiens GN=WDR1 PE=1 SV=4	WDR1_HUMAN	66	6.64	Homo sapiens	0.000110654	0	0.000106501	0	0	0.000179665	0	0	0	0	0.000211521	0.000449311	0.000292763	0.000477891	0.00020887	0.00133111	0.000500131	0	0	0	0	0.000221077	0	0.000907974	0	0	0	0.000102346	0	0
185	Latent-transforming growth factor beta-binding protein 1 OS=Homo sapiens GN=LTBP1 PE=1 SV=4	LTBP1_HUMAN	187	5.85	Homo sapiens	0.000263154	0	0.000267409	0	0	0	0	0	0	0	3.68287e-05	0.000128282	0.000103328	0.00013539	3.73654e-05	0	0	0	0	0	3.59294e-05	0.000216559	0	0.000112261	0	9.44389e-05	3.95129e-05	0.000503361	0	0.000226876
186	Ig gamma-4 chain C region OS=Homo sapiens GN=IGHG4 PE=1 SV=1	IGHG4_HUMAN	36	7.41	Homo sapiens	0.00726942	0.00676123	0	0	0	0	0	0.00299759	0	0.00580876	0.00541527	0.00570036	0.00643381	0.00587734	0.00516954	0	0	0.00314295	0.0139912	0.00372678	0	0	0	0.00174053	0	0	0	0.00464706	0.00221434	0
187	HLA class I histocompatibility antigen, A-24 alpha chain OS=Homo sapiens GN=HLA-A PE=1 SV=2	1A24_HUMAN	41	6.29	Homo sapiens	0.000660552	0.000192625	0.0011544	0	0	0.000704537	0.000749706	0.000210562	0.000522443	0.000417654	0	0	0	0.000390543	0	0.000877195	0.00080509	0	0	0	0	0.000355879	0.000426671	0.000729606	0	0	0.000270326	0.000492114	0	0.000258806
188	Desmoplakin OS=Homo sapiens GN=DSP PE=1 SV=3	DESP_HUMAN	332	6.78	Homo sapiens	0	0	0.000455504	0	5.09956e-05	0	0	0	0	7.02296e-05	0	6.95802e-05	0	0	0	6.30531e-05	0	0	2.02926e-05	0	0	0	0	0.000162321	0	0	0	0	0	0
189	Sushi, von Willebrand factor type A, EGF and pentraxin domain-containing protein 1 OS=Homo sapiens GN=SVEP1 PE=1 SV=3	SVEP1_HUMAN	390	5.2	Homo sapiens	7.93639e-05	7.08973e-05	4.17459e-05	0	0	7.48295e-05	0	2.2136e-05	9.68926e-05	0.000247962	0	0	0	0	0	6.70482e-05	0.000182461	0.00013918	0	0	0	0	0	0	0	2.69597e-05	5.88049e-05	3.43292e-05	0.000126395	0
190	Apolipoprotein A-V OS=Homo sapiens GN=APOA5 PE=1 SV=1	APOA5_HUMAN	41	6.4	Homo sapiens	0.000483488	0.000716834	0.00017144	0.000771675	0.000328885	0.000412283	0	0	0	0	0	0	0	0.0006934	0	0	0	0	0	0	0.000163873	0	0	0	0	0.000172411	0.000908554	0	0.000419781	0.000517612
191	Galectin-3-binding protein OS=Homo sapiens GN=LGALS3BP PE=1 SV=1	LG3BP_HUMAN	65	4.9	Homo sapiens	0	0	0	0	0	0	0.000266706	0.000146229	0	0	0	0	0	0	0	0	0.000293674	0.00055477	0.000445714	0	0.00194191	0.000509628	0.000373993	0.00110964	0	0	0	0	0	0
192	Calreticulin OS=Homo sapiens GN=CALR PE=1 SV=1	CALR_HUMAN	48	4.04	Homo sapiens	0	0	0	0	0	0.000933772	0	0	0	0.000356746	0	0	0	0.000333589	0	0.000420888	0.000692636	0	0.000140357	0	0.00042793	0.000459063	0.000507919	0	0	0.000294368	0	0.000140726	0.000604881	0.00077112
193	Mannosyl-oligosaccharide 1,2-alpha-mannosidase IA OS=Homo sapiens GN=MAN1A1 PE=1 SV=3	MA1A1_HUMAN	73	6.44	Homo sapiens	0	0	0	0.000429075	0.00032369	0.00050399	0.000719742	0	0	0	0	0	0	0.000344743	0	0	0.00026149	0.00024752	0.000992171	0.00110248	9.20382e-05	0	0	0	0	0	0	0	0	0
194	Ig lambda chain V-III region LOI OS=Homo sapiens PE=1 SV=1	LV302_HUMAN	12	4.72	Homo sapiens	0.00147442	0.000803155	0.000585755	0	0	0	0.00114001	0.00218831	0.00180379	0.000856844	0	0.000717342	0	0.000777857	0	0.000835076	0.00158925	0	0	0.00563843	0	0	0	0	0	0	0	0	0.00213729	0
195	Serum paraoxonase/lactonase 3 OS=Homo sapiens GN=PON3 PE=1 SV=3	PON3_HUMAN	40	5.1	Homo sapiens	0.000273868	0.00077826	0	0.000255168	0	0.00154744	0.000570004	0.00086142	0	0	0	0	0	0.000710735	0	0	0.000837553	0	0.0012675	0.00191808	0	0	0	0	0	0.000883004	0.000749742	0.000921209	0.00138634	0.000925344
196	Peptidyl-prolyl cis-trans isomerase A OS=Homo sapiens GN=PPIA PE=1 SV=2	PPIA_HUMAN	18	7.97	Homo sapiens	0.000895995	0	0.00168999	0	0	0	0	0	0	0	0.00193678	0.00201222	0.000430615	0.00122527	0.00171656	0.00195744	0	0	0	0	0	0.00121324	0.000585651	0	0	0.000588402	0.0012528	0.00261805	0	0
197	SPARC-like protein 1 OS=Homo sapiens GN=SPARCL1 PE=1 SV=2	SPRL1_HUMAN	75	4.45	Homo sapiens	0.000235907	0.000847954	0.000217079	0	0	0	0	0	0	0	0.000325603	0.000144925	0.000107713	0.000884597	0	0	0	0	0	0	0.000320375	9.59628e-05	0.000185382	0	0	0	0	0	0.000412749	0
198	Actin, alpha cardiac muscle 1 OS=Homo sapiens GN=ACTC1 PE=1 SV=1	ACTC_HUMAN	42	5.05	Homo sapiens	0.00638567	0	0.0018422	0	0	0	0	0	0	0	0	0	0	0	0	0	0	0	0	0	0	0.00362024	0	0.00161457	0.00533409	0	0.00157504	0.00720451	0	0
199	LIM and senescent cell antigen-like-containing domain protein 1 OS=Homo sapiens GN=LIMS1 PE=1 SV=4	LIMS1_HUMAN	37	8.08	Homo sapiens	0.000774264	0	0.000616471	0	0	0.000236467	0	0	0	0	0	0.000348977	0	0.00101987	0	0.0020937	0.00101777	0	0	0	0	0.000993906	0.000186124	0.000166614	0	0	0.000406312	0.00109108	0	0
200	Dermcidin OS=Homo sapiens GN=DCD PE=1 SV=2	DCD_HUMAN	11	6.52	Homo sapiens	0	0	0	0.00253821	0.0021482	0.00225535	0.000746895	0.000784823	0.00197716	0.00709506	0	0	0	0.00258449	0	0.000910992	0.00215555	0.002047	0.00131688	0.00101639	0	0.000672167	0	0.0024599	0.00139796	0	0	0	0.0020165	0
201	Histone H2B type 1-C/E/F/G/I OS=Homo sapiens GN=HIST1H2BC PE=1 SV=4	H2B1C_HUMAN	14	11	Homo sapiens	0	0	0	0	0	0	0.00346614	0.0038416	0.0030835	0.0056093	0.00149168	0.000581022	0.00113068	0.000886258	0	0.00403808	0.00237602	0.000957795	0.000481224	0	0	0	0	0	0	0	0	0	0	0
202	Mannan-binding lectin serine protease 2 OS=Homo sapiens GN=MASP2 PE=1 SV=4	MASP2_HUMAN	76	5.37	Homo sapiens	0	0	0	0	0	0	0	0	0	0	0	0	0	0	0	0	0	0	0	0	0.00038763	0	0	0	0	0.000881232	0.000538752	0.000796447	0.00187679	0.000349048
203	Nidogen-1 OS=Homo sapiens GN=NID1 PE=1 SV=3	NID1_HUMAN	136	4.93	Homo sapiens	0.000281127	0.000251538	0.00024738	4.8223e-05	0	6.43328e-05	6.56962e-05	5.88349e-05	0	0	5.20104e-05	0	0	0.000442003	0.000126357	0	0	0	0	0	4.94029e-05	0	0	0	0	0.000103459	0.00010866	4.87758e-05	0	7.80224e-05
204	Heat shock protein HSP 90-alpha OS=Homo sapiens GN=HSP90AA1 PE=1 SV=5	HS90A_HUMAN	85	4.66	Homo sapiens	0.000190252	0.000139467	0.000199898	0	0	0	0	0	0	0	8.14482e-05	9.56978e-05	0	0.000484341	0	0	0	0	0	0	0.000161103	0.000386835	0.000491033	0.000564155	0	8.30686e-05	0	0.000672383	0	0.000187254
205	SPARC OS=Homo sapiens GN=SPARC PE=1 SV=1	SPRC_HUMAN	35	4.47	Homo sapiens	0.000462041	0	0.00038505	0	0	0.000249979	0	0	0	0	0.00178787	0.00135133	0.000783408	0	0	0	0	0	0	0	0	0.000211253	0.000200795	0.000855546	0.000222665	0.000704113	0.000218418	0.000576476	0	0
206	Ig heavy chain V-III region GAL OS=Homo sapiens PE=1 SV=1	HV320_HUMAN	13	8.7	Homo sapiens	0.0015215	0.000741373	0.00204728	0.000523422	0.00104222	0.000912143	0.000631988	0	0.00292339	0.00302356	0	0.000836108	0.000593399	0.00145792	0.00107497	0	0.00107281	0	0.000596043	0	0	0	0	0.00138764	0	0	0.00172183	0	0.000533219	0.00284579
207	Insulin-like growth factor-binding protein complex acid labile subunit OS=Homo sapiens GN=IGFALS PE=1 SV=1	ALS_HUMAN	66	6.78	Homo sapiens	0.000556238	0.000239405	0.00035954	0.000215777	0	0	0	0	0	0	0	0.000123247	0.000116882	9.42857e-05	0.000209759	0.000154268	0	0	0	0	0.000877024	0.000503045	0.000422061	0	0	0.000106205	0	0	0	0
208	Filaggrin-2 OS=Homo sapiens GN=FLG2 PE=1 SV=1	FILA2_HUMAN	248	8.35	Homo sapiens	0	7.07298e-05	0.000200983	0	0	0.000115974	0	0	0.000174523	0.000135477	0.000168561	9.30277e-05	6.23599e-05	0	0	0.00023058	9.57163e-05	3.60461e-05	0	0	0	0	0	2.40627e-05	0	0	0	0	0	6.41053e-05
209	Proprotein convertase subtilisin/kexin type 9 OS=Homo sapiens GN=PCSK9 PE=1 SV=3	PCSK9_HUMAN	74	6.59	Homo sapiens	0	0	0	0.00046759	0.000365026	0	0.000111025	0	0	0	0	0	0	0.000512113	0	0	0	0	9.10423e-05	0.000257863	0.000625093	0.000300767	0.000142456	0	0	0	0	0	0.000262812	0
210	Isocitrate dehydrogenase [NADP], mitochondrial OS=Homo sapiens GN=IDH2 PE=1 SV=2	IDHP_HUMAN	51	8.95	Homo sapiens	0.000663156	0	0.000648281	0	0	0.000159889	0	0	0.000215433	0	0	0	0	0	0	0.00111408	0	0	0	0	0	0.00079163	0.000682613	0.000883685	0	0	0	0.00105441	0	0.00020806
211	Carboxypeptidase N catalytic chain OS=Homo sapiens GN=CPN1 PE=1 SV=1	CBPN_HUMAN	52	7.36	Homo sapiens	0	0	0	0.000130856	0	0	0	0	0	0	0	0	0	0	0	0	0	0	0	0	0.000263341	0	0.00013515	0	0	0.00128746	0.00122069	0.0010353	0.00198773	0.000811429
212	Complement factor H-related protein 1 OS=Homo sapiens GN=CFHR1 PE=1 SV=2	FHR1_HUMAN	38	7.42	Homo sapiens	0.000580576	0.000207977	0.00116368	0	0	0.0011795	0	0.00149252	0	0	0.00256517	0.00176423	0	0.00141016	0.000459693	0	0.00173753	0	0.000709172	0	0.000367103	0	0.00128216	0	0	0	0.00117809	0	0	0
213	Protein S100-A7 OS=Homo sapiens GN=S100A7 PE=1 SV=4	S10A7_HUMAN	11	6.78	Homo sapiens	0	0.000717965	0.0194588	0	0	0.000741304	0.00194944	0	0	0	0.000629373	0.00139823	0.00143905	0	0	0	0	0.00164263	0	0	0	0.000654292	0	0	0	0	0	0	0	0
214	ATP synthase subunit beta, mitochondrial OS=Homo sapiens GN=ATP5B PE=1 SV=3	ATPB_HUMAN	57	5.07	Homo sapiens	0.000488481	0	0.000874453	0	0	0	0	0.000250129	0.000283203	0	0	0	0	0	0	0.000902496	0.000171774	0	0	0	0	0.000256863	0.000855443	0.000417182	0	0	0.000128951	0.00106164	0	0.000555188
215	Fibrinogen-like protein 1 OS=Homo sapiens GN=FGL1 PE=1 SV=3	FGL1_HUMAN	36	5.67	Homo sapiens	0	0	0	0	0	0	0	0	0	0	0	0	0	0	0	0	0	0	0	0	0	0	0	0	0	0.00137004	0.00238855	0.0021442	0.00184956	0.00183275
216	Histone H2A.J OS=Homo sapiens GN=H2AFJ PE=1 SV=1	H2AJ_HUMAN	14	11.55	Homo sapiens	0	0	0	0	0	0	0.00432655	0	0.000761318	0.00313432	0.00124313	0	0.000553647	0	0	0.00293256	0.000662851	0	0.00374693	0.00119789	0	0	0	0	0	0	0	0	0	0
217	Ig heavy chain V-III region TRO OS=Homo sapiens PE=1 SV=1	HV301_HUMAN	13	10	Homo sapiens	0	0	0	0	0	0	0	0	0	0	0	0	0	0	0	0	0.000715206	0	0	0	0	0	0	0	0	0	0	0	0	0
218	Ig alpha-2 chain C region OS=Homo sapiens GN=IGHA2 PE=1 SV=3	IGHA2_HUMAN	37	6.02	Homo sapiens	0	0	0.00133974	0.00394028	0.00419926	0.00121213	0	0.00458271	0	0	0	0	0	0.0012347	0	0	0	0.0115999	0.00399243	0.00226629	0	0	0.00122126	0	0	0.00343684	0	0	0	0
219	Integrin alpha-6 OS=Homo sapiens GN=ITGA6 PE=1 SV=5	ITA6_HUMAN	127	6.57	Homo sapiens	0.00019682	0	0	0	0	0.000552571	0	0	0	0	0	6.77803e-05	0	0.00017493	0	0.000448021	0.00014628	0	0	0	0	0.000173504	0.000110076	4.69885e-05	0	0	0	0.0003446	0	0
220	Ig kappa chain V-IV region B17 OS=Homo sapiens PE=2 SV=1	KV404_HUMAN	15	6.51	Homo sapiens	0.00156497	0	0.000859693	0.000437222	0.000903257	0	0.00170345	0.00164241	0	0.000793356	0.000459132	0	0.000771418	0.000828444	0.00113888	0	0	0.00121208	0	0.000989687	0	0	0	0.000804783	0	0	0	0	0	0
221	HLA class I histocompatibility antigen, B-35 alpha chain OS=Homo sapiens GN=HLA-B PE=1 SV=1	1B35_HUMAN	40	6.43	Homo sapiens	0.000988974	0	0.000896663	0	0	0.0014443	0.000308094	0.000539565	0	0	0.000172174	0	0	0	0	0.000919411	0.00141799	0	0	0	0	0.000372199	0.00104508	0.00104718	0	0	0	0	0	0
222	Tubulin alpha-1B chain OS=Homo sapiens GN=TUBA1B PE=1 SV=1	TBA1B_HUMAN	50	4.7	Homo sapiens	0.000730315	0	0.00147051	0	0	0.000553367	0	0	0	0.000456635	0	0	0	0.00101291	0	0.00107519	0.000557861	0	0.000491828	0	0.000403127	0.00235138	0.0016693	0.00227891	0	0.000633823	0.000969239	0.00329615	0	0
223	Ig heavy chain V-III region TIL OS=Homo sapiens PE=1 SV=1	HV304_HUMAN	12	9.4	Homo sapiens	0.000608596	0	0.000537308	0	0	0	0	0.00166699	0.00179362	0	0	0	0	0	0	0	0	0	0	0	0	0	0	0	0	0	0	0	0	0
224	Solute carrier family 2, facilitated glucose transporter member 1 OS=Homo sapiens GN=SLC2A1 PE=1 SV=2	GTR1_HUMAN	54	8.92	Homo sapiens	0	0	0	0	0	0.000243035	0.000152145	0.00048629	0.00109758	0.00124438	0	0	0	0	0	0.00134706	0.00113678	0.000920656	0	0	0	0	0	0	0	0	0	0	0	0
225	Carboxypeptidase N subunit 2 OS=Homo sapiens GN=CPN2 PE=1 SV=3	CPN2_HUMAN	61	5.89	Homo sapiens	0	0	0	0	0	0	0	0	0	0	0	0	0	0	0	0	0	0	0	0	0.00169443	0.000423068	0.000571866	0.000591452	0.000316975	0	0	0	0	0
226	L-lactate dehydrogenase B chain OS=Homo sapiens GN=LDHB PE=1 SV=2	LDHB_HUMAN	37	5.93	Homo sapiens	0.000555143	0	0	0	0	0.000236467	0	0	0	0	0.000191174	0.000219846	0.00041798	0.000856812	0	0.000275181	0.000251289	0	0	0	0	0	0	0	0	0	0.000206612	0.000723696	0	0
227	Phospholipid transfer protein OS=Homo sapiens GN=PLTP PE=1 SV=1	PLTP_HUMAN	55	7.01	Homo sapiens	0	0	0	0.000378175	0.000491713	0.000159078	0.000467742	0.000172816	0	0.000394509	0	0	0	0.000463258	0	0	0.000168726	0.000162535	0.000122493	0	0.00012216	0.000337451	0	0.00038403	0	0	0	0	0	0
228	Integrin beta-2 OS=Homo sapiens GN=ITGB2 PE=1 SV=2	ITB2_HUMAN	85	6.94	Homo sapiens	0	0	0	0	0	0.00033837	0.000361623	0.000364848	0.000571893	0.00154587	0	0	0	0	0	0.000541957	0.000224574	0	7.92604e-05	0.000174651	0	0	0	0	0	0	0	0	0	0
229	Titin OS=Homo sapiens GN=TTN PE=1 SV=4	TITIN_HUMAN	381	6.02	Homo sapiens	0	0	0	0	0	0	0	0	0	0	0	0	0	0	7.22702e-05	0	0	0	0	0	0	0	0	3.97746e-05	0	0	0	0	0	0
230	Cathelicidin antimicrobial peptide OS=Homo sapiens GN=CAMP PE=1 SV=1	CAMP_HUMAN	19	10.03	Homo sapiens	0	0	0	0.00129042	0.00142338	0.000889664	0	0	0	0.00235208	0	0	0	0.000817794	0	0	0.00323086	0.0033303	0.000939698	0	0	0	0	0	0	0	0	0	0	0.000837715
231	Angiopoietin-related protein 6 OS=Homo sapiens GN=ANGPTL6 PE=1 SV=1	ANGL6_HUMAN	52	8.64	Homo sapiens	0.000255816	0.0011897	0.000325829	0	0	0	0	0	0	0	0	0	0	0	0	0	0	0	0	0	0.000263341	0	0.000467491	0	0	0.000609214	0.000648144	0.000517069	0.000691656	0.000611821
232	Keratin, type I cytoskeletal 13 OS=Homo sapiens GN=KRT13 PE=1 SV=4	K1C13_HUMAN	50	4.61	Homo sapiens	0	0	0	0	0	0.00272648	0	0.000345322	0	0	0	0.000258243	0	0	0.00123795	0.00217252	0.00132564	0.00235034	0	0	0	0	0	0	0	0	0	0.000203649	0	0
233	Platelet glycoprotein Ib beta chain OS=Homo sapiens GN=GP1BB PE=1 SV=1	GP1BB_HUMAN	22	9.37	Homo sapiens	0.000901045	0	0.00107276	0	0	0.000359329	0	0	0	0	0	0	0	0	0.000311672	0.0032732	0.000422622	0	0	0	0	0	0.000948465	0.000280215	0	0.000639926	0	0.00106788	0	0.000482321
234	Beta-parvin OS=Homo sapiens GN=PARVB PE=1 SV=1	PARVB_HUMAN	42	6.72	Homo sapiens	0.00031517	0	0.000310882	0	0	0	0	0.00041682	0	0	0	0	0	0.000443809	0	0.000383998	0	0	0	0	0	0.00104929	0	0.000641913	0	0	0	0.000962636	0	0
235	Transgelin-2 OS=Homo sapiens GN=TAGLN2 PE=1 SV=3	TAGL2_HUMAN	22	8.45	Homo sapiens	0.00120634	0	0.00137905	0	0	0	0	0	0	0	0	0.000761019	0.000719525	0	0.000317606	0.000455496	0	0	0	0	0	0	0.000479169	0.00149983	0	0.00144131	0	0.00121864	0	0
236	Transforming protein RhoA OS=Homo sapiens GN=RHOA PE=1 SV=1	RHOA_HUMAN	22	5.89	Homo sapiens	0.00126858	0.000358983	0.00106541	0	0	0.000729981	0	0	0	0	0	0.000391277	0	0	0	0.00211054	0.000421814	0	0	0	0	0.00100159	0.00110646	0.000819968	0.000347525	0.000318615	0.000347484	0.00168072	0	0
237	60 kDa heat shock protein, mitochondrial OS=Homo sapiens GN=HSPD1 PE=1 SV=2	CH60_HUMAN	61	5.55	Homo sapiens	0.000989516	0	0.000712737	0	0	0	0	0	0	0	0	0	0	0	0	0.000413329	0.00015213	0	0	0	0	0.000117987	0.00028571	0	0	0	0.000120495	0.000827907	0	0.000343807
238	Ig lambda chain V-IV region Hil OS=Homo sapiens PE=1 SV=1	LV403_HUMAN	12	6.45	Homo sapiens	0	0	0	0	0	0	0	0	0	0.000991696	0	0	0	0	0	0	0	0.000744952	0	0.000931695	0	0	0	0	0	0	0	0	0	0.000884254
239	Carboxypeptidase B2 OS=Homo sapiens GN=CPB2 PE=1 SV=2	CBPB2_HUMAN	48	7.77	Homo sapiens	0	0	0	0	0.000211356	0	0	0	0	0	0.000508002	0.000301928	0.000168302	0.00119108	0.0015	0	0	0	0	0	0	0	0	0	0	0	0	0	0	0
240	Glutathione peroxidase 3 OS=Homo sapiens GN=GPX3 PE=1 SV=2	GPX3_HUMAN	26	8.29	Homo sapiens	0	0	0	0.000513954	0.000909672	0.000304048	0.00134379	0.00033204	0.000823852	0.000896777	0	0	0	0	0	0	0	0.000866037	0.000557142	0	0.000402401	0.000712875	0	0	0	0.00027157	0.000284189	0	0	0
241	Protein disulfide-isomerase A3 OS=Homo sapiens GN=PDIA3 PE=1 SV=4	PDIA3_HUMAN	57	6.28	Homo sapiens	0.000388196	0	0.000352388	0	0	0	0	0	0	0.000180388	0	0	0	0	0	0.000175805	0	0	0	0	0.00017681	0	0.000123295	0.000316479	0	0	0	0.000765077	0	0
242	Proteoglycan 4 OS=Homo sapiens GN=PRG4 PE=1 SV=2	PRG4_HUMAN	151	10.16	Homo sapiens	0	0	0	0	4.49369e-05	0	0	9.44195e-05	0.000643106	0.000369409	0	0	0	0	0	0	0	0	0	0	0	0	0	0	0	0	0	0	0	0
243	Moesin OS=Homo sapiens GN=MSN PE=1 SV=3	MOES_HUMAN	68	6.32	Homo sapiens	0.000107399	0	0.000240614	0	0	0	0	0	0	0	0.0002053	0.000286434	0.000292188	0.000415848	0.000100835	0	0	0.000398833	0	0	0	0	0	0	0	0	0	9.98278e-05	0	0
244	Complement C1q subcomponent subunit A OS=Homo sapiens GN=C1QA PE=1 SV=2	C1QA_HUMAN	26	9.45	Homo sapiens	0	0	0	0	0	0.001111	0	0	0	0	0.000272055	0.000591561	0.000764184	0	0	0	0.0010911	0	0.00111428	0	0	0	0	0.000237105	0	0	0	0	0	0.000604968
245	Extracellular matrix protein 1 OS=Homo sapiens GN=ECM1 PE=1 SV=2	ECM1_HUMAN	61	6.7	Homo sapiens	0	0	0	0	0	0	0	0	0.000977862	0.00109229	0	0	0	0	0	0	0	0.000148388	0	0	0.000110144	0.000243243	0.00011521	9.68364e-05	0.000886955	0	0	0	0	0
246	Ig kappa chain V-III region VG (Fragment) OS=Homo sapiens PE=1 SV=1	KV309_HUMAN	13	4.59	Homo sapiens	0.001361	0	0	0	0	0	0.000687283	0	0	0	0	0	0.000596236	0	0	0	0	0.00138393	0.00111428	0	0	0	0.00160509	0	0	0	0	0	0	0
247	Adenylyl cyclase-associated protein 1 OS=Homo sapiens GN=CAP1 PE=1 SV=5	CAP1_HUMAN	52	8.2	Homo sapiens	0.00125733	0	0.000776579	0	0	0	0	0	0	0.000448389	0	0.00016554	0	0	0	0	0	0	0	0	0	0.000142189	0.000133689	0	0	0	0.000360154	0.000647291	0	0
248	Keratin, type II cytoskeletal 6B OS=Homo sapiens GN=KRT6B PE=1 SV=5	K2C6B_HUMAN	60	8.16	Homo sapiens	0	0	0.00656234	0	0.00451592	0	0	0	0	0	0.00266627	0.000785013	0.00228978	0	0	0	0	0	0.00333228	0	0	0	0	0.00360735	0	0.000525715	0	0	0	0
249	CD9 antigen OS=Homo sapiens GN=CD9 PE=1 SV=4	CD9_HUMAN	25	7.19	Homo sapiens	0	0	0	0	0	0.000326174	0	0.000700258	0	0	0	0	0	0.000261051	0.000551417	0.00123818	0.000371907	0	0	0	0	0.000287888	0.000559185	0	0	0	0	0	0	0
250	Chromogranin-A OS=Homo sapiens GN=CHGA PE=1 SV=7	CMGA_HUMAN	51	4.27	Homo sapiens	0	0	0	0	0	0	0	0	0	0	0.00170874	0.00080758	0.000768454	0	0	0	0	0	0	0	0	0.00014596	0.00027411	0	0	0	0	0	0	0
251	Ig heavy chain V-III region BRO OS=Homo sapiens PE=1 SV=1	HV305_HUMAN	13	6.49	Homo sapiens	0	0	0	0	0	0	0	0	0	0	0.000794651	0	0	0	0.00105489	0	0	0	0	0	0	0	0	0	0	0	0	0	0	0
252	Coagulation factor VII OS=Homo sapiens GN=F7 PE=1 SV=1	FA7_HUMAN	52	7.23	Homo sapiens	0.000310989	0.000809798	0.000397452	0	0	0	0	0	0	0	0	0	0	0	0	0	0	0	0	0	0.000395012	0.00021473	0.000534335	0	0	0.000135939	0	0.000390668	0.000529418	0
253	Collectin-10 OS=Homo sapiens GN=COLEC10 PE=2 SV=2	COL10_HUMAN	31	7.39	Homo sapiens	0.00104051	0.00220704	0.00150387	0.000670955	0.000763307	0	0	0	0	0	0	0	0	0	0	0	0	0	0	0	0.000224999	0.000238511	0	0	0	0	0	0	0.000270867	0
254	Guanine nucleotide-binding protein G(i) subunit alpha-2 OS=Homo sapiens GN=GNAI2 PE=1 SV=3	GNAI2_HUMAN	40	5.2	Homo sapiens	0	0	0	0	0	0.000620221	0	0	0.000944703	0.000554562	0	0	0	0	0	0.0010264	0.000231998	0.00045453	0.000168428	0	0	0	0	0	0	0	0	0.000169707	0	0
255	Azurocidin OS=Homo sapiens GN=AZU1 PE=1 SV=3	CAP7_HUMAN	27	9.65	Homo sapiens	0	0	0	0	0	0	0.000972985	0.000831647	0.00260209	0.000863563	0	0	0.000584914	0	0	0.00059733	0.00105135	0	0	0.000549826	0	0	0	0	0	0	0	0	0	0
256	Pigment epithelium-derived factor OS=Homo sapiens GN=SERPINF1 PE=1 SV=4	PEDF_HUMAN	46	6.33	Homo sapiens	0	0	0	0	0	0.000713884	0	0	0	0	0.000528847	0.000438227	0.0001677	0.00061803	0	0	0.000717773	0.000194335	0	0	0	0	0	0	0	0	0	0	0	0
257	ATP synthase subunit alpha, mitochondrial OS=Homo sapiens GN=ATP5A1 PE=1 SV=1	ATPA_HUMAN	60	9.56	Homo sapiens	0.000269524	0	0.0003885	0	0	0	0	0	0	0	0	0	0	0	0	0.000599417	0	0	0	0	0	0.000672886	0	0.000401253	0	0	0	0.000334709	0	0
258	Keratin, type II cuticular Hb6 OS=Homo sapiens GN=KRT86 PE=1 SV=1	KRT86_HUMAN	53	5.35	Homo sapiens	0	0	0	0	0	0	0	0	0	0	0.000854787	0.000273444	0	0.00155337	0.000714265	0	0	0	0	0	0	0	0	0	0	0	0	0	0	0
259	Sarcoplasmic/endoplasmic reticulum calcium ATPase 3 OS=Homo sapiens GN=ATP2A3 PE=1 SV=2	AT2A3_HUMAN	114	5.26	Homo sapiens	0.000193907	0	5.65587e-05	0	0	0	0	0	0	0	0	0	0	0	0	9.43152e-05	0	0	0	0	0	0.00016108	6.04088e-05	0.000106423	0	6.20073e-05	0	0.000530965	0	0.000231603
260	Ig kappa chain V-II region RPMI 6410 OS=Homo sapiens PE=4 SV=1	KV206_HUMAN	15	9.53	Homo sapiens	0	0	0	0	0	0	0	0.00095049	0	0	0	0	0	0	0	0	0.00254399	0	0	0	0	0	0.000463454	0	0	0	0.000509643	0	0	0
261	Ig lambda chain V-I region WAH OS=Homo sapiens PE=1 SV=1	LV106_HUMAN	12	6.46	Homo sapiens	0	0	0	0	0	0.000729106	0	0	0	0	0	0	0.000673207	0	0	0	0.00315869	0.00113146	0	0	0	0	0.000585651	0	0	0	0	0	0	0
262	Tropomyosin alpha-3 chain OS=Homo sapiens GN=TPM3 PE=1 SV=2	TPM3_HUMAN	33	4.38	Homo sapiens	0.00088523	0	0	0	0	0	0	0	0	0	0	0	0	0	0	0	0	0	0	0	0	0.00300852	0	0.003919	0	0	0	0.00112581	0	0
263	Coagulation factor XII OS=Homo sapiens GN=F12 PE=1 SV=3	FA12_HUMAN	68	7.76	Homo sapiens	0	0	0	0	0	0	0.00031535	0	0	0.000319088	0	0	0	0	0	0.00037078	0.000136731	0.000864222	0	0	0	0	0	0	0	0	0	0	0	0
264	Calmodulin-like protein 5 OS=Homo sapiens GN=CALML5 PE=1 SV=2	CALL5_HUMAN	16	4.05	Homo sapiens	0	0.000602366	0.00355154	0	0	0	0	0	0	0.000713492	0	0	0	0	0	0	0	0	0	0	0	0	0	0.000947132	0	0	0	0	0	0
265	Thymosin beta-4 OS=Homo sapiens GN=TMSB4X PE=1 SV=2	TYB4_HUMAN	5	4.72	Homo sapiens	0.0039646	0	0	0	0	0	0	0	0	0	0	0.00172162	0	0	0.00137135	0	0.00185954	0	0	0	0	0.00292824	0	0	0	0.00141217	0	0.00335316	0	0
266	Lysozyme C OS=Homo sapiens GN=LYZ PE=1 SV=1	LYSC_HUMAN	17	9.35	Homo sapiens	0	0	0	0	0	0	0	0	0	0	0.000416084	0	0	0	0	0	0	0	0	0	0	0	0	0.000362631	0	0	0.000434641	0	0.00175331	0.00248461
267	14-3-3 protein gamma OS=Homo sapiens GN=YWHAG PE=1 SV=2	1433G_HUMAN	28	4.52	Homo sapiens	0	0.00136278	0.00116581	0	0	0	0	0	0	0	0	0	0	0.000788013	0	0	0	0	0	0	0	0	0	0.00128608	0.000414213	0	0	0.000959673	0	0
268	CD59 glycoprotein OS=Homo sapiens GN=CD59 PE=1 SV=1	CD59_HUMAN	14	6.47	Homo sapiens	0	0	0	0	0	0	0	0.000678921	0	0	0	0	0	0	0	0.00180668	0.0027257	0	0.000830203	0.00159057	0	0	0	0	0	0	0	0	0	0
269	Junction plakoglobin OS=Homo sapiens GN=JUP PE=1 SV=3	PLAK_HUMAN	82	6.05	Homo sapiens	0	0	0.000573067	0	8.27497e-05	0	0	0	0	0	0.000213379	0.000220923	0	0	0	0	0	0.000111336	0	0	0	0	0	0.000478311	0	0	0	0	0	0
270	Annexin A1 OS=Homo sapiens GN=ANXA1 PE=1 SV=2	ANXA1_HUMAN	39	7.04	Homo sapiens	0	0	0.00103006	0	0	0.000202698	0	0	0.000549235	0.00214753	0	0	0	0	0	0.00119056	0.000489001	0	0	0	0	0	0	0	0	0	0	0	0	0
271	Guanine nucleotide-binding protein G(I)/G(S)/G(T) subunit beta-1 OS=Homo sapiens GN=GNB1 PE=1 SV=3	GBB1_HUMAN	37	5.85	Homo sapiens	0.000197382	0	0.000812118	0	0	0	0	0.000256889	0	0.000321631	0	0	0	0	0	0.00152792	0	0	0	0	0	0.000201189	0	0	0	0	0	0.000637952	0	0
272	Filaggrin OS=Homo sapiens GN=FLG PE=1 SV=3	FILA_HUMAN	435	9.6	Homo sapiens	0	0	1.51939e-05	5.63632e-05	1.54504e-05	0	0	0	6.16115e-05	0.000177555	0	0	0	0	0	0	0	0	0	0.000106807	0	0	0	0	0	0	0	0	0	0
273	Aggrecan core protein OS=Homo sapiens GN=ACAN PE=1 SV=2	PGCA_HUMAN	250	3.82	Homo sapiens	0	7.0164e-05	0	0	0	0	0.000139383	0	0	8.87299e-05	0	6.34175e-05	0	0.00015223	0	0	0	0	0	0	0	0	0	0	0	0	0	0	0	0
274	Protein MENT OS=Homo sapiens GN=MENT PE=2 SV=1	MENT_HUMAN	37	8.67	Homo sapiens	0	0	0	0	0	0.000434043	0.000241478	0.000233326	0	0	0	0	0	0	0	0	0.000264625	0	0	0	0.000460896	0	0.000845928	0	0	0	0	0	0	0
275	Leucine-rich alpha-2-glycoprotein OS=Homo sapiens GN=LRG1 PE=1 SV=2	A2GL_HUMAN	38	6.95	Homo sapiens	0	0	0	0	0	0.000230244	0	0.000460696	0	0	0.000549566	0.000190691	0.000416567	0	0.000180441	0	0.000257661	0.00047345	0.000177293	0	0	0	0	0.000155448	0	0	0	0	0	0
276	14-3-3 protein eta OS=Homo sapiens GN=YWHAH PE=1 SV=4	1433F_HUMAN	28	4.47	Homo sapiens	0	0	0	0	0	0	0	0	0	0	0	0	0	0.000221565	0	0	0	0	0	0	0	0.000257043	0.000870911	0.00116787	0	0	0	0.000604307	0	0
277	HLA class I histocompatibility antigen, A-2 alpha chain OS=Homo sapiens GN=HLA-A PE=1 SV=1	1A02_HUMAN	41	7	Homo sapiens	0	0	0.00071556	0	0	0.00170858	0	0	0	0	0	0	0	0	0	0.000488825	0	0	0	0	0	0	0.000767638	0	0	0	0	0.000329506	0	0
278	Coronin-1C OS=Homo sapiens GN=CORO1C PE=1 SV=1	COR1C_HUMAN	53	7.09	Homo sapiens	0.000388784	0	0	0	0	0	0	0	0	0	0	0	0	0	0	0	0	0	0	0	0	0.000415755	0.0001326	0	0	0.00026563	0	0.000824794	0	0.000200209
279	PDZ and LIM domain protein 1 OS=Homo sapiens GN=PDLIM1 PE=1 SV=4	PDLI1_HUMAN	36	7.03	Homo sapiens	0	0	0.000183593	0	0	0	0	0	0	0	0	0	0	0	0	0	0	0	0	0	0	0	0	0	0	0.0008808	0.000727946	0.0024278	0	0
280	Calumenin OS=Homo sapiens GN=CALU PE=1 SV=2	CALU_HUMAN	37	4.23	Homo sapiens	0	0	0	0	0	0	0.00118326	0	0	0	0.000378284	0.000415691	0.000427826	0.000336371	0.000464446	0	0	0	0	0	0	0	0	0	0	0	0	0	0	0
281	Suprabasin OS=Homo sapiens GN=SBSN PE=1 SV=2	SBSN_HUMAN	61	7.01	Homo sapiens	0	0.000287557	0.000329281	0	0	0	0	0	0	0.000168559	0.000342352	0.000118791	0.000385963	0	0	0	0.00031264	0.000148388	0	0	0	0	0	0	0	0	0	0	0	0
282	Histone H3.3 OS=Homo sapiens GN=H3F3A PE=1 SV=2	H33_HUMAN	15	11.83	Homo sapiens	0	0	0	0	0	0	0.00120365	0	0.00287449	0.000761058	0	0	0.00103102	0	0	0	0	0	0	0.000745356	0	0	0	0	0	0	0	0	0	0
283	Platelet glycoprotein 4 OS=Homo sapiens GN=CD36 PE=1 SV=2	CD36_HUMAN	53	8.06	Homo sapiens	0.000510993	0	0.000439811	0	0	0	0	0	0	0	0	0	0	0	0	0	0.000175428	0	0	0	0	0.000279959	0	0	0.000363426	0	0	0.000187741	0	0
284	Chloride intracellular channel protein 1 OS=Homo sapiens GN=CLIC1 PE=1 SV=4	CLIC1_HUMAN	27	4.82	Homo sapiens	0.000270487	0.000292504	0.000505127	0	0	0	0	0	0	0	0	0	0	0	0	0.0017197	0	0	0	0	0	0	0.000255059	0.00167143	0	0	0	0.000497104	0	0
285	Alpha-actinin-4 OS=Homo sapiens GN=ACTN4 PE=1 SV=2	ACTN4_HUMAN	105	5.12	Homo sapiens	0	0	0.00020083	0	0	0	0	0	0	0	0	0	0	0	0	0.00033939	0	0	0	0	0	0.00101266	0.000368123	0.00183242	0.000662726	0	0	0.000355577	0	0
286	Transforming growth factor-beta-induced protein ig-h3 OS=Homo sapiens GN=TGFBI PE=1 SV=1	BGH3_HUMAN	75	7.77	Homo sapiens	0	0	0	0	0	0	0	0	0	0	0.00018662	0.000144925	0	0	0	0	0	0	0	0	0.000709758	9.59628e-05	0	0	0	0	0	0	0	0
287	Complement factor H-related protein 4 OS=Homo sapiens GN=CFHR4 PE=1 SV=3	FHR4_HUMAN	65	4.58	Homo sapiens	0	0	0	0	0	0.0004444	0	0.000877407	0	0	0	0	0.000119247	0	0	0.000165414	0.0008015	0.000833019	0	0	0	0	0	0	0	0	0	0	0	0
288	Kallistatin OS=Homo sapiens GN=SERPINA4 PE=1 SV=3	KAIN_HUMAN	49	7.85	Homo sapiens	0	0	0	0	0.000276507	0	0.000536134	0.000427574	0.000555966	0.000918657	0	0	0	0.000386795	0	0	0	0.000184728	0.000137492	0	0	0	0	0	0	0	0	0	0.000281319	0
289	Monocyte differentiation antigen CD14 OS=Homo sapiens GN=CD14 PE=1 SV=2	CD14_HUMAN	40	6.16	Homo sapiens	0	0	0	0	0	0	0	0	0	0	0	0.000203358	0.00127361	0	0.000171419	0	0	0	0	0	0	0	0	0	0	0.000176521	0	0	0.000344616	0
290	Prenylcysteine oxidase 1 OS=Homo sapiens GN=PCYOX1 PE=1 SV=3	PCYOX_HUMAN	57	6.1	Homo sapiens	0	0	0	0.000249847	0.000297221	0.000138688	0.000144138	0	0	0.000270582	0	0	0	0	0	0	0.000579099	0	0	0	0	0	0	0	0	0	0	0	0	0
291	F-actin-capping protein subunit beta OS=Homo sapiens GN=CAPZB PE=1 SV=4	CAPZB_HUMAN	31	5.23	Homo sapiens	0.000286073	0	0	0	0	0	0	0	0	0	0	0	0	0.000300184	0	0.000323255	0	0	0	0	0	0.000826891	0.000226704	0.000777594	0.000251396	0	0	0.000974333	0	0
292	Hemoglobin subunit delta OS=Homo sapiens GN=HBD PE=1 SV=2	HBD_HUMAN	16	8.26	Homo sapiens	0	0.0207525	0	0	0	0	0	0	0	0	0.00173078	0.00650557	0.00410853	0.00174482	0.00473283	0.0032887	0	0	0	0	0	0	0	0	0	0	0	0.000844358	0	0
293	Desmoglein-1 OS=Homo sapiens GN=DSG1 PE=1 SV=2	DSG1_HUMAN	114	4.66	Homo sapiens	0	0	0	0	0	0	0	0	0	0	0	6.35638e-05	0	0	0	0.000182218	8.15586e-05	0.000119101	0	0	0	0	0	0.000185809	0	0	0	0	0	0
294	Myosin regulatory light polypeptide 9 OS=Homo sapiens GN=MYL9 PE=1 SV=4	MYL9_HUMAN	20	4.54	Homo sapiens	0	0	0	0	0	0	0	0	0	0	0	0	0	0	0	0	0	0	0.000724285	0	0	0.000372199	0	0.00225642	0	0	0	0.000339415	0	0.00157916
295	Cytochrome b-245 heavy chain OS=Homo sapiens GN=CYBB PE=1 SV=2	CY24B_HUMAN	65	8.76	Homo sapiens	0	0	0	0	0	0	0	0	0.000663344	0.00110044	0	0	0	0	0	0.000637252	0.000293401	0	0.000807032	0.000600592	0	0	0	0	0	0	0	0	0	0
296	Transitional endoplasmic reticulum ATPase OS=Homo sapiens GN=VCP PE=1 SV=4	TERA_HUMAN	89	4.89	Homo sapiens	0	0	0	0	0	0	0	0	0	0	0	0	0	0	0	0	0	0	0	0	0	0.000289123	0.000312989	0.000674777	0	0	0	0.000264653	0	0
297	Eosinophil peroxidase OS=Homo sapiens GN=EPX PE=1 SV=2	PERE_HUMAN	81	10.81	Homo sapiens	0	0	0	0	0	0	0	0	0	0	0	0	0.000143538	0	0	0.00293253	0	0	0	0	0	0	0	0	0	0	0	0	0	0
298	Zinc-alpha-2-glycoprotein OS=Homo sapiens GN=AZGP1 PE=1 SV=2	ZA2G_HUMAN	34	5.92	Homo sapiens	0	0	0.000189638	0.000192892	0	0.000232507	0	0.000253913	0	0.000638176	0	0	0	0	0	0.000610966	0.000272939	0	0	0	0	0	0	0	0	0	0	0.000198673	0	0
299	Solute carrier family 2, facilitated glucose transporter member 3 OS=Homo sapiens GN=SLC2A3 PE=2 SV=1	GTR3_HUMAN	54	7.24	Homo sapiens	0	0	0	0	0	0.000459423	0	0	0.000199291	0.000838082	0	0	0	0.000114885	0	0.000374123	0.000353496	0	0	0	0	0	0	0.000114162	0	0	0	0.000373642	0	0
300	Myosin regulatory light chain 12A OS=Homo sapiens GN=MYL12A PE=1 SV=2	ML12A_HUMAN	20	4.4	Homo sapiens	0.000365157	0	0.00116954	0	0	0	0	0	0	0	0	0	0	0	0	0.000509085	0.000463996	0	0	0	0	0.000369692	0	0.00148583	0	0	0	0.000339415	0	0
301	Pentraxin-related protein PTX3 OS=Homo sapiens GN=PTX3 PE=1 SV=3	PTX3_HUMAN	42	4.67	Homo sapiens	0	0	0	0	0	0.00018822	0.00124463	0.000308323	0	0	0.000168415	0.00017253	0	0	0	0	0	0	0.000344897	0	0	0	0	0	0	0.000336421	0	0	0	0
302	Reelin OS=Homo sapiens GN=RELN PE=1 SV=3	RELN_HUMAN	388	5.74	Homo sapiens	0	0	0	0	0	0	0	0	0	0	0	0	0	0	0	0	7.31152e-05	0	0	0	0	0	0	0	0	0	5.769e-05	0	0.000103415	4.09745e-05
303	Dickkopf-related protein 3 OS=Homo sapiens GN=DKK3 PE=1 SV=2	DKK3_HUMAN	38	4.3	Homo sapiens	0	0	0.000184975	0	0	0	0	0	0	0	0	0.000226529	0	0.000507247	0	0	0	0	0	0	0	0	0	0	0	0	0	0.000174566	0.000401307	0
304	HLA class I histocompatibility antigen, B-15 alpha chain OS=Homo sapiens GN=HLA-B PE=1 SV=2	1B15_HUMAN	40	6.25	Homo sapiens	0	0	0	0	0	0	0	0	0	0	0	0	0	0	0	0.00113539	0	0	0	0	0	0	0	0	0	0	0.000286674	0.000584983	0	0
305	Basement membrane-specific heparan sulfate proteoglycan core protein OS=Homo sapiens GN=HSPG2 PE=1 SV=4	PGBM_HUMAN	469	6.49	Homo sapiens	0	0	0	0	0	0	4.53272e-05	0	0.000103538	0.000154755	0	0	0	0	0	0	0	0	1.65215e-05	0	0	0	0	0	0	0	0	0	0	0
306	Complement C2 OS=Homo sapiens GN=C2 PE=1 SV=2	CO2_HUMAN	83	7.43	Homo sapiens	0	0	0	0	0	0	0	0	0	0	0	0	0	0	0	0	0	0.000107704	0	0	0.000164985	0.000487608	0	0	0	0	0	0	0	0
307	Tropomyosin alpha-1 chain OS=Homo sapiens GN=TPM1 PE=1 SV=2	TPM1_HUMAN	33	4.39	Homo sapiens	0.000995884	0	0	0	0	0	0	0	0	0	0	0	0	0	0	0	0	0	0	0	0	0	0	0.00155665	0	0	0	0	0	0
308	Ficolin-2 OS=Homo sapiens GN=FCN2 PE=1 SV=2	FCN2_HUMAN	34	6.77	Homo sapiens	0	0	0	0	0	0	0	0	0.00032315	0.00148228	0	0	0	0	0	0.00136328	0	0	0	0	0	0	0	0	0	0	0	0	0	0.0010881
309	Bone marrow proteoglycan OS=Homo sapiens GN=PRG2 PE=1 SV=2	PRG2_HUMAN	25	6.75	Homo sapiens	0	0	0	0	0	0	0	0	0	0	0	0.000325373	0.000310043	0	0	0.0036853	0.000762842	0	0	0	0	0	0	0	0	0	0	0	0	0
310	Zyxin OS=Homo sapiens GN=ZYX PE=1 SV=1	ZYX_HUMAN	61	6.65	Homo sapiens	0	0	0.00011523	0	0	0	0	0	0	0	0	0	0	0	0	0.000176261	0	0	0	0	0	0	0	0	0	0	0.000429608	0.000550521	0	0
311	Protein disulfide-isomerase OS=Homo sapiens GN=P4HB PE=1 SV=3	PDIA1_HUMAN	57	4.49	Homo sapiens	0	0	0	0	0	0	0	0	0	0	0	0	0	0	0	0.00018863	0	0	0	0	0.000299178	0.000645167	0	0.000211785	0	0	0	0	0	0
312	Mannose-binding protein C OS=Homo sapiens GN=MBL2 PE=1 SV=2	MBL2_HUMAN	26	5.14	Homo sapiens	0.00028089	0.000370687	0	0	0	0	0	0	0	0	0	0	0	0	0	0	0	0	0	0	0.00144591	0.00113284	0	0.000696147	0	0.000269597	0	0	0	0
313	Carcinoembryonic antigen-related cell adhesion molecule 8 OS=Homo sapiens GN=CEACAM8 PE=1 SV=2	CEAM8_HUMAN	38	7.45	Homo sapiens	0	0	0	0	0	0.000230244	0.000216206	0.000437752	0.00070529	0.00146154	0	0	0	0	0	0.000665618	0	0	0.000381202	0	0	0	0	0	0	0	0	0	0	0
314	Tubulin beta chain OS=Homo sapiens GN=TUBB PE=1 SV=2	TBB5_HUMAN	50	4.52	Homo sapiens	0.00249874	0	0.00341368	0	0	0	0	0	0	0	0	0	0	0	0	0	0	0	0	0	0	0	0.000632503	0.00241177	0	0	0	0.00436923	0	0.00157292
315	Triosephosphate isomerase OS=Homo sapiens GN=TPI1 PE=1 SV=3	TPIS_HUMAN	31	5.72	Homo sapiens	0	0	0.00108528	0	0	0	0	0	0	0	0	0.000277681	0	0.000200123	0	0	0	0	0	0	0	0	0	0	0	0	0	0.00129922	0	0
316	Keratin, type II cuticular Hb2 OS=Homo sapiens GN=KRT82 PE=3 SV=3	KRT82_HUMAN	57	6.72	Homo sapiens	0	0	0	0	0	0	0	0	0	0	0.000186143	0.000127128	0	0	0	0	0	0	0	0	0	0	0	0	0	0	0	0	0	0
317	Fatty acid-binding protein, epidermal OS=Homo sapiens GN=FABP5 PE=1 SV=3	FABP5_HUMAN	15	7.05	Homo sapiens	0	0	0.00599568	0	0.000450892	0	0	0	0	0	0	0	0	0	0	0	0	0	0	0	0	0	0	0.000397836	0	0	0	0	0	0
318	Actin-related protein 3 OS=Homo sapiens GN=ACTR3 PE=1 SV=3	ARP3_HUMAN	47	5.69	Homo sapiens	0	0	0	0	0	0	0	0	0	0	0	0.000183151	0	0.000271258	0	0.000426422	0	0	0	0	0	0	0	0	0	0	0	0.000360368	0	0.000225767
319	Superoxide dismutase [Mn], mitochondrial OS=Homo sapiens GN=SOD2 PE=1 SV=2	SODM_HUMAN	25	8.45	Homo sapiens	0.000645116	0	0.00053907	0	0	0	0	0	0	0.000476014	0	0	0	0	0	0.00104098	0.000391645	0	0	0	0	0.000879396	0.000281112	0	0	0	0	0	0	0
320	Vasodilator-stimulated phosphoprotein OS=Homo sapiens GN=VASP PE=1 SV=3	VASP_HUMAN	40	9.41	Homo sapiens	0.000182579	0	0	0	0	0	0	0	0	0	0	0	0	0	0	0	0	0	0	0	0	0	0	0	0	0	0.000560561	0.00151367	0	0
321	Microtubule-associated protein RP/EB family member 2 OS=Homo sapiens GN=MAPRE2 PE=1 SV=1	MARE2_HUMAN	37	5.28	Homo sapiens	0.000197382	0	0.000174262	0	0	0	0	0	0	0	0	0	0	0	0	0	0	0	0	0	0	0	0.00028183	0.000651498	0	0	0	0.000728783	0	0
322	Ig heavy chain V-III region TUR OS=Homo sapiens PE=1 SV=1	HV318_HUMAN	12	10.12	Homo sapiens	0	0	0	0	0	0	0	0	0	0	0	0	0	0	0.000571398	0	0	0	0	0	0	0	0	0	0	0	0	0	0	0
323	Annexin A2 OS=Homo sapiens GN=ANXA2 PE=1 SV=2	ANXA2_HUMAN	39	7.91	Homo sapiens	0	0	0.00293768	0	0	0	0	0	0	0	0	0	0	0	0	0.000532637	0	0	0	0	0	0	0	0	0	0	0	0	0	0
324	Ig lambda chain V-III region SH OS=Homo sapiens PE=1 SV=1	LV301_HUMAN	11	6.5	Homo sapiens	0	0	0	0.000596211	0	0	0	0	0	0.000934739	0	0.000658752	0	0	0	0	0.00168887	0	0	0	0	0	0	0	0	0	0	0	0	0
325	Alpha-enolase OS=Homo sapiens GN=ENO1 PE=1 SV=2	ENOA_HUMAN	47	7.46	Homo sapiens	0	0	0.000570734	0	0	0	0	0	0	0	0	0	0	0	0	0	0	0	0	0	0	0	0	0	0	0	0	0.000930797	0	0
326	14-3-3 protein epsilon OS=Homo sapiens GN=YWHAE PE=1 SV=1	1433E_HUMAN	29	4.36	Homo sapiens	0.000610105	0.000408783	0.00101165	0	0	0	0	0	0	0	0	0	0	0.000337566	0	0	0	0	0	0	0	0	0	0.000305535	0	0	0	0	0	0
327	Erythrocyte membrane protein band 4.2 OS=Homo sapiens GN=EPB42 PE=1 SV=3	EPB42_HUMAN	77	8.17	Homo sapiens	0	0	0	0	0	0	0	0	0	0	0	0	0	0	0	0.000327442	0.000549433	0	0	0	0	0	0	0	0	0	0	0	0	0
328	Ras-related protein Rab-10 OS=Homo sapiens GN=RAB10 PE=1 SV=1	RAB10_HUMAN	23	8.61	Homo sapiens	0.000769262	0	0.000458417	0	0	0	0	0	0	0	0	0	0	0	0	0	0	0	0	0	0	0	0	0	0	0	0	0.00058738	0	0.00161392
329	Proteasome subunit alpha type-6 OS=Homo sapiens GN=PSMA6 PE=1 SV=1	PSA6_HUMAN	27	6.74	Homo sapiens	0	0	0.000499139	0	0	0.000324047	0	0	0	0	0	0	0	0	0	0	0	0	0	0	0.00114352	0.000949394	0.00128797	0	0	0	0	0	0	0
330	Versican core protein OS=Homo sapiens GN=VCAN PE=1 SV=3	CSPG2_HUMAN	373	4.15	Homo sapiens	0	0	0	0	0	5.63784e-05	0.000117623	2.14519e-05	0	0	0	0	0	5.08122e-05	0	0	0	0	1.8062e-05	0	0	0	0	0	0	0	0	0	0	0
331	EH domain-containing protein 3 OS=Homo sapiens GN=EHD3 PE=1 SV=2	EHD3_HUMAN	61	6.53	Homo sapiens	0	0	0	0	0	0	0	0	0	0	0	0	0	0	0	0	0	0	0	0	0	0	0	0.000396787	0	0	0	0.000993564	0	0
332	Serpin B3 OS=Homo sapiens GN=SERPINB3 PE=1 SV=2	SPB3_HUMAN	45	6.81	Homo sapiens	0	0	0.00237974	0	0	0	0	0	0	0	0	0	0	0	0	0	0	0	0	0	0	0	0	0	0	0	0	0	0	0
333	Annexin A3 OS=Homo sapiens GN=ANXA3 PE=1 SV=3	ANXA3_HUMAN	36	5.71	Homo sapiens	0	0	0	0	0	0.000689135	0	0	0.000305197	0.00219714	0	0	0	0	0	0.000278359	0	0	0	0	0	0	0	0	0	0	0	0	0	0
334	Tenascin OS=Homo sapiens GN=TNC PE=1 SV=3	TENA_HUMAN	241	4.52	Homo sapiens	0	0	0	0	0	0	0	0	0	0	0	0	0	0	0	0	0	0	0	0	0.000299105	0	0	0	0.000128354	0	0	0	0	0
335	Platelet endothelial cell adhesion molecule OS=Homo sapiens GN=PECAM1 PE=1 SV=1	PECA1_HUMAN	83	6.99	Homo sapiens	0.000106847	0	0	0	0	0	0	0	0	0.000137541	0	0	0	7.49742e-05	0	0.000250275	0.00011202	0	0	0	0	0	0	0	0	0	0	7.99218e-05	0	0
336	Collagen alpha-1(XVIII) chain OS=Homo sapiens GN=COL18A1 PE=1 SV=5	COIA1_HUMAN	178	5.89	Homo sapiens	0	0	0	3.82275e-05	0	0	0	0	0.000122184	0.000182848	0	0	0	0	0	0	0	0	0	0	0	0	0	0	0	0	0	0	0	0
337	Biotinidase OS=Homo sapiens GN=BTD PE=1 SV=2	BTD_HUMAN	61	6.22	Homo sapiens	0	0	0	0	0.000111237	0	0	0	0	0	0	0	0	0	0	0	0	0	0	0	0	0	0	0	0	0	0	0	0	0
338	Angiopoietin-related protein 3 OS=Homo sapiens GN=ANGPTL3 PE=1 SV=1	ANGL3_HUMAN	54	6.68	Homo sapiens	0	0.000146252	0	0	0	0	0	0	0	0	0	0	0	0	0	0	0	0	0	0	0.000124422	0	0.000128737	0	0	0	0	0	0	0
339	Ras suppressor protein 1 OS=Homo sapiens GN=RSU1 PE=1 SV=3	RSU1_HUMAN	32	9.16	Homo sapiens	0	0	0	0	0	0	0	0	0	0	0	0.000269003	0	0	0	0	0	0	0	0	0	0.000688595	0.000545485	0.000288972	0	0	0	0.00052308	0	0
340	Keratinocyte proline-rich protein OS=Homo sapiens GN=KPRP PE=1 SV=1	KPRP_HUMAN	64	8.29	Homo sapiens	0	0	0.000103271	0	0	0	0	0	0	0	0	0	0	0	0	0	0	0	0	0	0	0	0	0.000281864	0	0	0	0	0	0
341	Proteasome subunit alpha type-1 OS=Homo sapiens GN=PSMA1 PE=1 SV=1	PSA1_HUMAN	30	6.6	Homo sapiens	0.000243438	0	0	0	0	0.000543623	0	0	0	0	0	0	0	0	0	0	0	0	0	0	0.00102917	0	0.000347591	0	0	0	0	0	0	0
342	Protein disulfide-isomerase A4 OS=Homo sapiens GN=PDIA4 PE=1 SV=2	PDIA4_HUMAN	73	4.7	Homo sapiens	0.000182225	0.00016228	0	0	0	0	0	0	0	0	0	0.000148896	0	0	0	0	0	0	0	0	0	0.000152958	0	0	0	0	0	9.087e-05	0	0
343	Ig heavy chain V-II region ARH-77 OS=Homo sapiens PE=4 SV=1	HV209_HUMAN	16	8.45	Homo sapiens	0	0	0	0.00042528	0.000634067	0	0.000570004	0	0	0	0	0	0	0.000388928	0	0	0	0	0	0	0	0	0	0	0	0	0	0	0	0
344	Malate dehydrogenase, mitochondrial OS=Homo sapiens GN=MDH2 PE=1 SV=3	MDHM_HUMAN	36	8.9	Homo sapiens	0.00073721	0	0.000183593	0	0	0	0	0	0	0	0	0	0	0	0	0	0	0	0	0	0	0.000206777	0.000195217	0	0	0	0	0.00112046	0	0
345	Peroxiredoxin-2 OS=Homo sapiens GN=PRDX2 PE=1 SV=5	PRDX2_HUMAN	22	5.76	Homo sapiens	0	0.00119598	0	0	0	0	0	0	0	0	0	0	0.00105529	0	0	0	0	0	0	0	0	0	0	0	0	0	0	0	0	0
346	Intelectin-1 OS=Homo sapiens GN=ITLN1 PE=1 SV=1	ITLN1_HUMAN	35	5.89	Homo sapiens	0	0	0	0	0	0	0	0	0	0	0	0	0	0	0	0	0	0	0	0	0	0	0	0	0	0.000201967	0.000748745	0	0.00102647	0
347	Keratin, type I cuticular Ha1 OS=Homo sapiens GN=KRT31 PE=1 SV=3	K1H1_HUMAN	47	4.53	Homo sapiens	0	0	0	0	0	0	0	0	0	0	0	0	0	0.00107736	0	0	0	0	0	0	0	0	0	0	0	0	0	0	0	0
348	Calponin-2 OS=Homo sapiens GN=CNN2 PE=1 SV=4	CNN2_HUMAN	34	7.38	Homo sapiens	0	0	0	0	0	0	0	0	0	0	0	0	0	0	0	0	0	0	0	0	0	0	0	0	0	0	0	0.00267044	0	0.000468135
349	IgGFc-binding protein OS=Homo sapiens GN=FCGBP PE=1 SV=3	FCGBP_HUMAN	572	4.99	Homo sapiens	0	0	0	0	0	0	0	0	0	0	0	0	0	0	0	0	0	0	0	0	0	0	0	0.000157461	0	0	0	0	0	0
350	Complement factor H-related protein 2 OS=Homo sapiens GN=CFHR2 PE=1 SV=1	FHR2_HUMAN	31	6.34	Homo sapiens	0	0	0	0	0	0	0	0	0	0	0.0014584	0.000861097	0.000748318	0	0	0	0	0	0	0	0	0	0	0	0	0	0	0	0	0
351	Ras-related C3 botulinum toxin substrate 1 OS=Homo sapiens GN=RAC1 PE=1 SV=1	RAC1_HUMAN	21	8.65	Homo sapiens	0.000420227	0	0	0	0	0	0	0	0	0	0	0	0	0	0	0	0	0	0	0	0	0	0	0	0	0	0	0	0	0
352	F-actin-capping protein subunit alpha-1 OS=Homo sapiens GN=CAPZA1 PE=1 SV=3	CAZA1_HUMAN	33	5.42	Homo sapiens	0	0	0	0	0	0	0	0	0	0	0	0	0	0	0	0	0	0	0	0	0	0.000442153	0	0.000359835	0.00023616	0	0	0.000410399	0	0
353	Tropomyosin beta chain OS=Homo sapiens GN=TPM2 PE=1 SV=1	TPM2_HUMAN	33	4.36	Homo sapiens	0	0	0	0	0	0	0	0	0	0	0	0	0	0	0	0	0	0	0	0	0	0	0	0.000895003	0	0	0	0.0013066	0	0.00176851
354	Ig lambda chain V region 4A OS=Homo sapiens PE=4 SV=1	LV001_HUMAN	12	7.12	Homo sapiens	0	0	0	0	0	0	0	0	0	0	0	0	0	0	0	0	0	0	0.00176857	0.00375896	0	0	0	0	0	0	0	0	0	0
355	Adipocyte plasma membrane-associated protein OS=Homo sapiens GN=APMAP PE=1 SV=2	APMAP_HUMAN	46	6.02	Homo sapiens	0	0	0	0	0	0	0.000376867	0.000187675	0	0	0	0	0	0	0	0	0	0	0	0	0	0	0	0	0	0	0	0	0	0
356	Serglycin OS=Homo sapiens GN=SRGN PE=1 SV=3	SRGN_HUMAN	18	4.57	Homo sapiens	0	0	0	0	0	0	0.000992743	0	0	0	0	0	0	0.0012258	0.000380932	0	0	0	0	0	0	0	0	0	0	0	0	0	0	0
357	T-complex protein 1 subunit gamma OS=Homo sapiens GN=CCT3 PE=1 SV=4	TCPG_HUMAN	61	6.44	Homo sapiens	0	0	0	0	0	0	0	0	0	0	0	0	0	0	0	0	0	0	0	0	0	0.000425059	0.000340823	0.000395171	0	0	0	0.000110736	0	0
358	Importin subunit beta-1 OS=Homo sapiens GN=KPNB1 PE=1 SV=2	IMB1_HUMAN	97	4.41	Homo sapiens	0	0	0	0	0	0	0	0	0	0	0	0	0	0	0	0	0	0	0	0	0	0.000152967	7.24516e-05	6.35539e-05	0	0	0	0.000208007	0	0
359	Phosphoglycerate kinase 1 OS=Homo sapiens GN=PGK1 PE=1 SV=3	PGK1_HUMAN	45	8.27	Homo sapiens	0	0	0.000214923	0	0	0	0	0	0	0	0	0	0	0	0	0	0	0	0	0	0	0	0	0	0	0	0	0.000523424	0	0
360	Macrophage receptor MARCO OS=Homo sapiens GN=MARCO PE=1 SV=1	MARCO_HUMAN	53	9.15	Homo sapiens	0.000374019	0	0.000121655	0	0	0	0	0	0	0	0	0	0	0	0	0	0	0	0	0	0	0	0	0	0	0.000265478	0.000355771	0.000125161	0	0
361	Desmocollin-1 OS=Homo sapiens GN=DSC1 PE=1 SV=2	DSC1_HUMAN	100	5.08	Homo sapiens	0	0	0	0	0	0	0	0	0	0	0	0	0	0	0	0	0	0	0	0	0	0	0	0.00015116	0	0	0	0	0	0
362	Coronin-1A OS=Homo sapiens GN=CORO1A PE=1 SV=4	COR1A_HUMAN	51	6.67	Homo sapiens	0	0	0	0	0	0.000155005	0	0	0	0.000335761	0	0	0	0	0	0.000407311	0.000181959	0	0	0	0	0	0	0	0	0	0	0	0	0
363	Small proline-rich protein 2E OS=Homo sapiens GN=SPRR2E PE=2 SV=2	SPR2E_HUMAN	8	8.38	Homo sapiens	0	0	0.00788282	0	0	0	0	0	0	0	0	0	0	0	0	0	0	0	0	0	0	0	0	0	0	0	0	0	0	0
364	Proteoglycan 3 OS=Homo sapiens GN=PRG3 PE=1 SV=2	PRG3_HUMAN	25	4.43	Homo sapiens	0	0	0	0	0	0	0	0	0	0	0	0	0	0	0	0.000645116	0	0	0	0	0	0	0	0	0	0	0	0	0	0
365	Peptidase inhibitor 16 OS=Homo sapiens GN=PI16 PE=1 SV=1	PI16_HUMAN	49	5.09	Homo sapiens	0	0	0	0	0	0	0	0	0	0	0	0	0	0	0	0	0	0	0	0	0	0.000146882	0	0	0	0	0	0	0	0
366	Ig kappa chain V-III region CLL OS=Homo sapiens PE=4 SV=2	KV308_HUMAN	14	8.7	Homo sapiens	0	0	0	0	0	0	0	0	0	0	0	0	0.000553647	0	0	0	0	0	0	0	0	0	0	0	0	0	0	0	0	0
367	Keratin, type II cytoskeletal 3 OS=Homo sapiens GN=KRT3 PE=1 SV=3	K2C3_HUMAN	64	6.41	Homo sapiens	0	0	0	0	0	0	0	0	0	0	0	0	0	0	0.000969288	0	0	0	0	0	0	0	0	0	0	0	0	0	0	0
368	ADP-ribosylation factor 1 OS=Homo sapiens GN=ARF1 PE=1 SV=2	ARF1_HUMAN	21	6.8	Homo sapiens	0	0	0	0	0	0	0	0	0	0	0	0	0	0.000753904	0	0.000511997	0	0	0	0	0	0	0	0.000440338	0	0	0	0	0	0
369	Beta-2-microglobulin OS=Homo sapiens GN=B2M PE=1 SV=1	B2MG_HUMAN	14	6.51	Homo sapiens	0	0	0	0	0	0	0	0	0	0	0	0	0	0	0	0	0	0	0	0	0	0	0	0	0	0	0.000527779	0	0	0
370	Tenascin-X OS=Homo sapiens GN=TNXB PE=1 SV=3	TENX_HUMAN	464	4.81	Homo sapiens	0	0	0	0	0	0	0	0	0	0	0	1.85519e-05	0	0	0	0	0	0	0	0	0	1.55112e-05	1.49824e-05	0	0	0	0	0	2.97083e-05	0
371	Actin-related protein 2 OS=Homo sapiens GN=ACTR2 PE=1 SV=1	ARP2_HUMAN	45	6.72	Homo sapiens	0	0	0.000146875	0	0	0.000194428	0	0	0	0	0	0	0	0	0	0.000926811	0	0	0	0	0	0	0	0	0	0	0	0.000376385	0	0
372	Calnexin OS=Homo sapiens GN=CANX PE=1 SV=2	CALX_HUMAN	68	4.21	Homo sapiens	0	0	0	0	0	0	0	0	0	0.000578033	0	0	0	0	0	0	0	0	0	0	0	0	0	0	0	0	0	0	0	0
373	ADP/ATP translocase 3 OS=Homo sapiens GN=SLC25A6 PE=1 SV=4	ADT3_HUMAN	33	10.26	Homo sapiens	0	0	0	0	0	0	0	0	0	0	0	0	0	0	0	0.000303664	0	0	0	0	0	0	0	0.000179001	0	0	0	0.000610082	0	0.000481761
374	Group XIIB secretory phospholipase A2-like protein OS=Homo sapiens GN=PLA2G12B PE=1 SV=2	PG12B_HUMAN	22	5.81	Homo sapiens	0	0	0	0	0	0	0	0	0	0	0	0	0	0.000444973	0	0.000488724	0	0	0	0	0	0	0	0	0	0	0	0	0	0
375	Cytochrome b-c1 complex subunit 2, mitochondrial OS=Homo sapiens GN=UQCRC2 PE=1 SV=3	QCR2_HUMAN	48	8.92	Homo sapiens	0.000183849	0	0	0	0	0	0	0	0	0	0	0	0	0	0	0	0	0	0	0	0	0	0	0	0	0	0	0	0	0
376	Ig heavy chain V-I region V35 OS=Homo sapiens PE=1 SV=1	HV103_HUMAN	13	9.87	Homo sapiens	0	0	0	0	0	0	0.000687283	0.000664081	0	0	0	0	0	0	0	0	0	0	0	0	0	0	0	0	0	0	0	0	0	0
377	Actin-related protein 2/3 complex subunit 1B OS=Homo sapiens GN=ARPC1B PE=1 SV=3	ARC1B_HUMAN	41	8.44	Homo sapiens	0	0	0.00017144	0	0	0	0	0	0	0	0	0	0	0	0	0	0	0	0	0	0	0	0	0	0	0	0	0.000326546	0	0
378	P-selectin OS=Homo sapiens GN=SELP PE=1 SV=3	LYAM3_HUMAN	91	6.57	Homo sapiens	9.69754e-05	0	0.000106281	0	0	0	0	0	0	0	0	0	0	0	0	0	0	0	0	0	0	0	0	0	0.00012745	0	0	0.00025902	0	0
379	Putative elongation factor 1-alpha-like 3 OS=Homo sapiens GN=EEF1A1P5 PE=5 SV=1	EF1A3_HUMAN	50	9.58	Homo sapiens	0	0	0.000602584	0	0	0	0	0	0	0	0	0	0	0	0	0.000200418	0	0	0	0	0	0	0	0	0	0	0	0	0	0
380	Carbonic anhydrase 1 OS=Homo sapiens GN=CA1 PE=1 SV=2	CAH1_HUMAN	29	7.14	Homo sapiens	0	0.00263168	0	0	0	0	0	0	0	0	0	0	0	0	0	0	0	0	0	0	0	0	0	0	0	0	0	0	0	0
381	Actin-related protein 2/3 complex subunit 3 OS=Homo sapiens GN=ARPC3 PE=1 SV=3	ARPC3_HUMAN	21	8.83	Homo sapiens	0	0	0	0	0	0.00037644	0	0	0	0	0	0	0	0	0	0	0	0	0	0	0	0	0	0	0	0	0	0.000637542	0	0
382	Voltage-dependent anion-selective channel protein 3 OS=Homo sapiens GN=VDAC3 PE=1 SV=1	VDAC3_HUMAN	31	8.9	Homo sapiens	0.000806328	0	0.000647939	0	0	0	0	0	0	0	0	0	0	0	0	0	0	0	0	0	0	0.000232168	0	0	0	0	0	0	0	0.000676523
383	Protein S100-A12 OS=Homo sapiens GN=S100A12 PE=1 SV=2	S10AC_HUMAN	11	6.23	Homo sapiens	0	0	0	0	0	0	0	0	0	0	0	0.00110922	0.00249266	0	0	0	0	0	0	0	0	0	0	0	0	0	0	0	0	0
384	Actin-related protein 2/3 complex subunit 5 OS=Homo sapiens GN=ARPC5 PE=1 SV=3	ARPC5_HUMAN	16	5.3	Homo sapiens	0	0	0	0	0	0	0	0	0	0	0	0	0	0	0	0	0	0	0	0	0	0	0	0	0	0	0	0.000414594	0	0
385	Protocadherin-12 OS=Homo sapiens GN=PCDH12 PE=1 SV=1	PCD12_HUMAN	129	4.93	Homo sapiens	0	0	0	0	0	0	0	0	0	0	0	0	0	0	0	0	0	0	0	0	5.20837e-05	0	0	0	0	0	0	0	0	0
386	Tetraspanin-14 OS=Homo sapiens GN=TSPAN14 PE=1 SV=1	TSN14_HUMAN	31	6.84	Homo sapiens	0	0	0	0	0	0.000537242	0	0	0	0	0	0	0	0	0	0	0	0	0	0	0	0	0	0	0	0	0	0	0	0
387	Heat shock protein beta-1 OS=Homo sapiens GN=HSPB1 PE=1 SV=2	HSPB1_HUMAN	23	6.36	Homo sapiens	0	0	0.00144662	0	0	0	0	0	0	0	0	0	0	0	0	0	0	0	0	0	0	0	0	0	0	0	0	0	0	0
388	Ras-related protein Rab-1B OS=Homo sapiens GN=RAB1B PE=1 SV=1	RAB1B_HUMAN	22	5.38	Homo sapiens	0	0	0.000319503	0	0	0	0	0	0	0	0	0	0	0	0	0	0	0	0	0	0	0	0	0	0	0	0	0.000460559	0	0
389	Disintegrin and metalloproteinase domain-containing protein 10 OS=Homo sapiens GN=ADAM10 PE=1 SV=1	ADA10_HUMAN	84	7.81	Homo sapiens	0	0	0	0	0	9.70756e-05	0	0	0	0	0	0	0	0	0	0	0	0	0	0	0	0	0	0	0	0	0	0	0	0
390	C-C motif chemokine 5 OS=Homo sapiens GN=CCL5 PE=1 SV=3	CCL5_HUMAN	10	9.29	Homo sapiens	0.00161279	0	0	0	0	0	0	0	0	0	0	0	0	0	0	0	0	0	0	0	0	0	0	0	0	0	0	0	0	0
391	Hepatocyte growth factor activator OS=Homo sapiens GN=HGFAC PE=1 SV=1	HGFA_HUMAN	71	7.24	Homo sapiens	0	0	0	0	0	0	0.000555012	0	0	0	0	0	0	0	0	0	0	0	0	0	0	0	0	0	0	0	0	0	0	0
392	L-lactate dehydrogenase A chain OS=Homo sapiens GN=LDHA PE=1 SV=2	LDHA_HUMAN	37	8.45	Homo sapiens	0	0	0.000618656	0	0	0	0	0	0	0	0	0	0	0	0	0	0	0	0	0	0	0	0	0	0	0	0	0	0	0
393	Soluble scavenger receptor cysteine-rich domain-containing protein SSC5D OS=Homo sapiens GN=SSC5D PE=1 SV=3	SRCRL_HUMAN	166	6.06	Homo sapiens	0	0	0	0	0	0	0	0	0	0	0	0	0	0	0	0	0	0	0	0	0.000122967	0	0.000272143	0	0	0	0	0	0	0
394	Receptor-type tyrosine-protein phosphatase C OS=Homo sapiens GN=PTPRC PE=1 SV=2	PTPRC_HUMAN	147	6.08	Homo sapiens	0	0	0	0	0	0	0	0	0	0	0	0	0	0	0	6.81694e-05	0	0	0	0	0	0	0	0	0	0	0	0	0	0
395	Thioredoxin OS=Homo sapiens GN=TXN PE=1 SV=3	THIO_HUMAN	12	4.55	Homo sapiens	0	0	0	0	0	0	0	0	0	0.000856844	0	0	0	0	0	0	0	0	0	0	0	0	0	0	0	0	0	0	0	0
396	Angiogenin OS=Homo sapiens GN=ANG PE=1 SV=1	ANGI_HUMAN	17	10.09	Homo sapiens	0	0	0	0	0	0	0	0	0	0	0.000405116	0	0	0	0	0	0	0	0	0	0	0	0	0	0	0	0	0	0	0.000935183
397	Ig delta chain C region OS=Homo sapiens GN=IGHD PE=1 SV=2	IGHD_HUMAN	42	8.02	Homo sapiens	0	0	0	0	0	0	0	0	0	0	0	0	0	0.00089507	0.000166365	0	0	0	0	0	0	0	0	0	0	0	0	0	0	0
398	Calpain small subunit 1 OS=Homo sapiens GN=CAPNS1 PE=1 SV=1	CPNS1_HUMAN	28	4.82	Homo sapiens	0	0	0	0	0	0	0	0	0	0	0	0	0	0	0	0	0	0	0	0	0	0	0	0	0	0	0	0.000478156	0	0
399	SH3 domain-binding glutamic acid-rich-like protein 3 OS=Homo sapiens GN=SH3BGRL3 PE=1 SV=1	SH3L3_HUMAN	10	4.56	Homo sapiens	0	0	0	0	0	0	0	0	0	0	0	0	0	0.000622286	0	0	0	0	0	0	0	0	0	0	0	0	0	0	0	0
400	Neural cell adhesion molecule 1 OS=Homo sapiens GN=NCAM1 PE=1 SV=3	NCAM1_HUMAN	95	4.51	Homo sapiens	0	0	0	0	0	0	0	0	0	0	0	0	0	0.000366257	0	0	0	0	0	0	0	7.83576e-05	0	0	0	0	0	0	0	0
401	EGF-containing fibulin-like extracellular matrix protein 1 OS=Homo sapiens GN=EFEMP1 PE=1 SV=2	FBLN3_HUMAN	55	4.7	Homo sapiens	0	0	0	0	0	0	0	0	0	0	0	0	0	0	0	0	0	0	0	0	0	0	0	0	0.00013901	0	0	0	0.000544089	0
402	Caldesmon OS=Homo sapiens GN=CALD1 PE=1 SV=3	CALD1_HUMAN	93	5.35	Homo sapiens	0	0	0	0	0	0	0	0	0	0	0	0	0	0	0	0	0	0	0	0	0	0	0	0	0	7.53713e-05	0	0.000324598	0	0
403	Catalase OS=Homo sapiens GN=CAT PE=1 SV=3	CATA_HUMAN	60	7.41	Homo sapiens	0	0	0	0	0	0	0	0	0	0.000171369	0	0	0	0	0	0.000348894	0	0	0	0	0	0	0	0	0	0	0	0	0	0
404	CD99 antigen OS=Homo sapiens GN=CD99 PE=1 SV=1	CD99_HUMAN	19	4.34	Homo sapiens	0	0	0	0	0	0	0	0	0	0	0	0	0	0.000997523	0	0	0	0	0	0	0	0	0	0.000314081	0	0	0	0	0	0
405	Heat shock 70 kDa protein 1A/1B OS=Homo sapiens GN=HSPA1A PE=1 SV=5	HSP71_HUMAN	70	5.47	Homo sapiens	0	0	0.00020083	0	0	0	0	0	0	0	0	0	0	0	0	0	0	0	0	0	0	0	0	0.000127876	0	0	0	0.000576715	0	0
406	ADAMTS-like protein 2 OS=Homo sapiens GN=ADAMTSL2 PE=1 SV=1	ATL2_HUMAN	105	6.38	Homo sapiens	0	0	0	0	0	0	0	0	0	0	0	0	0	0	0	0	0	0	0	0	0.000260833	0	0	0	0	0	0	0	0	0
407	Ig lambda-7 chain C region OS=Homo sapiens GN=IGLC7 PE=4 SV=2	LAC7_HUMAN	11	8.48	Homo sapiens	0	0	0	0	0	0	0	0	0	0	0	0	0	0.00282857	0	0	0	0	0	0	0	0	0	0	0	0	0	0	0	0
408	Glutathione peroxidase 1 OS=Homo sapiens GN=GPX1 PE=1 SV=4	GPX1_HUMAN	22	6.51	Homo sapiens	0	0	0	0	0	0	0	0	0	0	0	0	0	0	0	0	0	0	0	0	0	0	0	0	0	0	0	0.000301523	0	0
409	Platelet glycoprotein V OS=Homo sapiens GN=GP5 PE=1 SV=1	GPV_HUMAN	61	10.24	Homo sapiens	0	0	0	0	0	0	0	0	0	0	0	0	0	0	0	0	0	0	0	0	0	0	0	0	0	0	0	0.000108746	0	0.000432528
410	ATP synthase subunit O, mitochondrial OS=Homo sapiens GN=ATP5O PE=1 SV=1	ATPO_HUMAN	23	10.61	Homo sapiens	0	0	0	0	0	0	0	0	0	0	0	0	0	0	0	0	0	0	0	0	0	0	0	0	0	0	0	0.00029369	0	0
411	Calpain-1 catalytic subunit OS=Homo sapiens GN=CAPN1 PE=1 SV=1	CAN1_HUMAN	82	5.35	Homo sapiens	0	0	0	0	0	0	0	0	0	0	0	0	0	0	0	0	0	0	0	0	0	0	0	7.27749e-05	0	0	0	8.23764e-05	0	0
412	Protein unc-13 homolog D OS=Homo sapiens GN=UNC13D PE=1 SV=1	UN13D_HUMAN	123	6.64	Homo sapiens	5.93752e-05	0	0	0	0	0	0	0	0	0	0	0	0	0	0	0	0	0	0	0	0	0	0	0	0	0	0	0	0	0
413	Fibulin-5 OS=Homo sapiens GN=FBLN5 PE=1 SV=1	FBLN5_HUMAN	50	4.33	Homo sapiens	0	0	0	0	0	0	0	0	0	0	0	0	0	0	0	0	0	0	0	0	0	0	0	0	0	0	0.000299897	0	0.000138637	0
414	Olfactomedin-4 OS=Homo sapiens GN=OLFM4 PE=1 SV=1	OLFM4_HUMAN	57	5.37	Homo sapiens	0	0	0	0	0	0	0	0	0	0.000784028	0	0	0	0	0	0	0	0	0	0	0	0	0	0	0	0	0	0	0	0
415	Proteasome subunit beta type-6 OS=Homo sapiens GN=PSMB6 PE=1 SV=4	PSB6_HUMAN	25	4.54	Homo sapiens	0	0	0	0	0	0	0	0	0	0	0	0	0	0	0	0	0	0	0	0	0	0.000297759	0	0	0	0	0	0	0	0
416	Dynamin-1-like protein OS=Homo sapiens GN=DNM1L PE=1 SV=2	DNM1L_HUMAN	82	6.8	Homo sapiens	0	0	0	0	0	0	0	0	0	0	0	0	0	0	0	0	0	0	0	0	0	0	0	7.51796e-05	0	0	0	0.00016368	0	0
417	Macrophage migration inhibitory factor OS=Homo sapiens GN=MIF PE=1 SV=4	MIF_HUMAN	12	8.05	Homo sapiens	0	0	0	0	0	0	0	0	0	0	0	0	0	0	0	0	0	0	0	0	0	0	0	0.00101102	0	0	0	0	0	0
418	Neutral alpha-glucosidase AB OS=Homo sapiens GN=GANAB PE=1 SV=3	GANAB_HUMAN	107	6.06	Homo sapiens	0	0	0	0	0	0	0	0	0	0	0	0	0	0	0	0	0	0	0	0	0	0	0	0.000113386	0	0	0	0	0	0
419	Synaptosomal-associated protein 23 OS=Homo sapiens GN=SNAP23 PE=1 SV=1	SNP23_HUMAN	23	4.62	Homo sapiens	0	0	0	0	0	0	0	0	0	0	0	0	0	0	0	0	0	0	0	0	0	0	0	0	0	0	0	0.000295143	0	0
420	Neuropilin-1 OS=Homo sapiens GN=NRP1 PE=1 SV=3	NRP1_HUMAN	103	5.71	Homo sapiens	0	0	0	0	0	0	0	0	0	0	0	0	0	0	0	0	0	0	0	0	6.5231e-05	0	0	0	0	0	0	0	0	0
421	Protein G6b OS=Homo sapiens GN=G6B PE=1 SV=1	G6B_HUMAN	26	10.08	Homo sapiens	0	0	0	0	0	0	0	0	0	0	0	0	0	0	0	0	0	0	0	0	0	0	0	0	0	0	0	0.000514937	0	0
422	C-type lectin domain family 11 member A OS=Homo sapiens GN=CLEC11A PE=1 SV=1	CLC11_HUMAN	36	4.82	Homo sapiens	0	0	0	0	0	0	0	0	0	0	0	0	0	0.000345185	0	0	0	0	0	0	0.000186633	0	0	0	0	0	0	0	0	0
423	Sex hormone-binding globulin OS=Homo sapiens GN=SHBG PE=1 SV=2	SHBG_HUMAN	44	6.7	Homo sapiens	0	0	0	0	0	0	0	0	0	0	0	0	0	0	0	0	0	0	0	0	0	0	0	0	0	0.000720654	0	0	0	0
424	Plastin-2 OS=Homo sapiens GN=LCP1 PE=1 SV=6	PLSL_HUMAN	70	5.07	Homo sapiens	0	0	0	0	0	0	0	0	0	0	0	0	0	0	0	0	0	0	0	0	0	0	0	0	0	0	0	0	0.000217852	0
425	Plectin OS=Homo sapiens GN=PLEC PE=1 SV=3	PLEC_HUMAN	532	5.76	Homo sapiens	0	0	0	0	0	0	0	0	0	0	0	0	0	0	0	0	0	0	0	0	0	0	0	0	0	0	0	5.70346e-05	0	0
426	Endonuclease domain-containing 1 protein OS=Homo sapiens GN=ENDOD1 PE=1 SV=2	ENDD1_HUMAN	55	5.38	Homo sapiens	0	0	0	0	0	0	0	0	0	0	0	0	0	0	0	0	0	0	0	0	0	0	0	0	0	0	0	0.000243425	0	0.000190657
427	Carboxypeptidase Q OS=Homo sapiens GN=CPQ PE=1 SV=1	CBPQ_HUMAN	52	6.1	Homo sapiens	0	0	0	0	0	0	0	0	0	0	0	0	0	0	0	0	0	0	0	0	0	0	0	0	0	0.000135785	0	0.000388013	0	0
428	Transforming growth factor beta-1 OS=Homo sapiens GN=TGFB1 PE=1 SV=2	TGFB1_HUMAN	44	8.63	Homo sapiens	0	0	0	0	0	0	0	0	0	0	0	0	0	0	0	0	0	0	0	0	0	0	0	0.000135626	0	0	0	0	0	0
429	Caspase-14 OS=Homo sapiens GN=CASP14 PE=1 SV=2	CASPE_HUMAN	28	5.28	Homo sapiens	0	0	0.000717362	0	0	0	0	0	0	0	0	0	0	0	0	0	0	0	0	0	0	0	0	0	0	0	0	0	0	0
430	Protocadherin-18 OS=Homo sapiens GN=PCDH18 PE=2 SV=3	PCD18_HUMAN	126	4.78	Homo sapiens	0.000163536	6.27233e-05	0	0	0	0	0	0	0	0	0	0	0	0	0	0	0	0	0	0	0	0	0	0	0	0	0	0	0	0
431	Cadherin-related family member 2 OS=Homo sapiens GN=CDHR2 PE=1 SV=2	CDHR2_HUMAN	142	4.08	Homo sapiens	0	0	0	0	0	0	0	0	0	0	0	0	0	0	0	0	0	0	0	0	0	0	0	0	0	0	0	0	0.000390798	0
432	Resistin OS=Homo sapiens GN=RETN PE=2 SV=1	RETN_HUMAN	11	6.89	Homo sapiens	0	0	0	0	0	0	0	0.000864082	0	0	0	0	0	0	0	0	0.000890102	0	0	0	0	0	0	0	0	0	0	0	0	0
433	Tropomodulin-3 OS=Homo sapiens GN=TMOD3 PE=1 SV=1	TMOD3_HUMAN	40	4.83	Homo sapiens	0	0	0.000161192	0	0	0	0	0	0	0	0	0	0	0	0	0	0	0	0	0	0	0	0	0	0	0	0	0	0	0
434	Eukaryotic translation initiation factor 5A-1 OS=Homo sapiens GN=EIF5A PE=1 SV=2	IF5A1_HUMAN	17	4.86	Homo sapiens	0	0	0	0	0	0	0	0	0	0	0	0	0	0	0	0	0	0	0	0	0	0	0	0.000891418	0	0	0	0	0	0
435	Heparanase OS=Homo sapiens GN=HPSE PE=1 SV=2	HPSE_HUMAN	61	9.71	Homo sapiens	0	0	0	0	0	0	0	0	0	0	0	0	0.000132434	0	0	0	0	0	0	0	0	0	0	0	0	0	0	0	0	0
436	Hepatocyte growth factor-like protein OS=Homo sapiens GN=MST1 PE=1 SV=2	HGFL_HUMAN	80	7.71	Homo sapiens	0	0	0	0	0	0	0	0	0	0	0	0	0	0	0	0	0	0.000339008	0	0	0	0	0	0	0	0	0	0	0	0
437	Keratin, type II cytoskeletal 78 OS=Homo sapiens GN=KRT78 PE=2 SV=2	K2C78_HUMAN	57	5.83	Homo sapiens	0	0	0	0	0	0.000416065	0	0	0	0	0	0	0	0	0	0	0	0	0	0	0	0	0	0	0	0	0	0	0	0
438	Amyloid-like protein 2 OS=Homo sapiens GN=APLP2 PE=1 SV=2	APLP2_HUMAN	87	4.44	Homo sapiens	0	0	0	0	0	0	0	0	0	0	0	0	0	0.000106962	0	0	0	0	0	0	0	0	0	0	0	0	0	0	0	0
439	Prolactin-inducible protein OS=Homo sapiens GN=PIP PE=1 SV=1	PIP_HUMAN	17	8.18	Homo sapiens	0	0	0	0	0	0.000479667	0	0	0	0	0	0	0	0	0	0	0	0	0	0	0	0	0	0	0	0	0	0	0	0
440	Tight junction protein ZO-2 OS=Homo sapiens GN=TJP2 PE=1 SV=2	ZO2_HUMAN	134	7.43	Homo sapiens	0	0	0	0	0	0	0	0	0	0	0	0	0	0	0	0	0	0	0	0	0	5.51779e-05	0	0	0	0	0	0	0	0
441	EMILIN-1 OS=Homo sapiens GN=EMILIN1 PE=1 SV=2	EMIL1_HUMAN	107	4.81	Homo sapiens	8.28811e-05	0	0	0	0	0	0	0	0	0	0	0	0	0	0	0	0	0	0	0	0	0	0	0	0	0	0	0	0	0
442	Peroxiredoxin-1 OS=Homo sapiens GN=PRDX1 PE=1 SV=1	PRDX1_HUMAN	22	8.31	Homo sapiens	0	0	0.000913006	0	0	0	0	0	0	0	0	0	0	0	0	0	0	0	0	0	0	0	0	0	0	0	0	0	0	0
443	Keratin, type II cytoskeletal 4 OS=Homo sapiens GN=KRT4 PE=1 SV=4	K2C4_HUMAN	57	6.55	Homo sapiens	0	0	0	0	0	0	0	0	0	0	0	0	0	0	0.000357795	0	0	0	0	0	0	0	0	0	0	0	0	0	0	0
444	Cathepsin G OS=Homo sapiens GN=CTSG PE=1 SV=2	CATG_HUMAN	29	11.69	Homo sapiens	0	0	0	0	0	0	0	0	0	0.000410357	0	0	0	0	0	0	0	0	0	0	0	0	0	0	0	0	0	0	0	0
445	Proline-serine-threonine phosphatase-interacting protein 2 OS=Homo sapiens GN=PSTPIP2 PE=1 SV=4	PPIP2_HUMAN	39	8.68	Homo sapiens	0	0	0	0	0	0	0	0	0	0	0	0	0	0	0	0	0	0	0	0	0	0	0	0.000614784	0	0	0	0	0	0
446	Sulfhydryl oxidase 1 OS=Homo sapiens GN=QSOX1 PE=1 SV=3	QSOX1_HUMAN	83	9.18	Homo sapiens	0	0	0	0	0	0	0	0	0	0	0	0	0	0	0	0	0	0	0	0	0	0	0	0	0	0	0	0	8.35162e-05	0
447	CD226 antigen OS=Homo sapiens GN=CD226 PE=1 SV=2	CD226_HUMAN	39	8.04	Homo sapiens	0	0	0	0	0	0	0	0	0	0	0	0	0	0	0	0	0	0	0	0	0	0	0	0	0	0	0	0	0	0.000268875
448	Reticulon-4 OS=Homo sapiens GN=RTN4 PE=1 SV=2	RTN4_HUMAN	130	4.14	Homo sapiens	0	0	0	0	0	0	0	0	0	0	0	0	0	0	0	0	0	0	0	0	0	0	0	6.81579e-05	0	0	0	0	0	0
449	Protein Shroom3 OS=Homo sapiens GN=SHROOM3 PE=1 SV=2	SHRM3_HUMAN	217	7.85	Homo sapiens	0	0	0	0	0	0	0	0	0	5.48403e-05	0	0	0	0	0	0	0	0	0	0	0	0	0	0	0	0	0	0	0	0
450	Proteasome subunit alpha type-7 OS=Homo sapiens GN=PSMA7 PE=1 SV=1	PSA7_HUMAN	28	8.73	Homo sapiens	0	0	0	0	0	0	0	0	0	0	0	0	0	0	0	0	0	0	0	0	0.000249106	0	0	0	0	0	0	0	0	0
451	Nexilin OS=Homo sapiens GN=NEXN PE=1 SV=1	NEXN_HUMAN	81	4.99	Homo sapiens	0	0	0	0	0	0	0	0	0	0	0	0	0	0	0	0	0	0	0	0	0	0	0	0	0	0	0	0.0001672	0	0
452	Proto-oncogene tyrosine-protein kinase Src OS=Homo sapiens GN=SRC PE=1 SV=3	SRC_HUMAN	60	7.47	Homo sapiens	0	0	0	0	0	0	0	0	0	0	0	0	0	0	0	0.000167015	0	0	0	0	0	0	0	0	0	0	0	0	0	0
453	T-complex protein 1 subunit beta OS=Homo sapiens GN=CCT2 PE=1 SV=4	TCPB_HUMAN	57	6.42	Homo sapiens	0	0	0	0	0	0	0	0	0	0	0	0	0	0	0	0	0	0	0	0	0	0	0	0.000316479	0	0	0	0	0	0
454	Myosin light chain kinase, smooth muscle OS=Homo sapiens GN=MYLK PE=1 SV=4	MYLK_HUMAN	211	6.03	Homo sapiens	0	0	0	0	0	0	0	0	0	0	0	0	0	0	0	0	0	0	0	0	0	0	0	2.79953e-05	0	0	0	6.36104e-05	0	0
455	NADH-cytochrome b5 reductase 3 OS=Homo sapiens GN=CYB5R3 PE=1 SV=3	NB5R3_HUMAN	34	7.68	Homo sapiens	0	0	0	0	0	0	0	0	0	0	0	0	0	0	0	0	0	0	0	0	0	0	0	0	0	0	0	0.000199656	0	0
456	Ig kappa chain V-I region HK102 (Fragment) OS=Homo sapiens GN=IGKV1-5 PE=4 SV=1	KV110_HUMAN	13	8.46	Homo sapiens	0	0	0	0	0.00078039	0	0	0	0	0	0	0	0	0	0	0	0	0	0	0	0	0	0	0.000454386	0	0	0	0	0	0
457	Syntaxin-binding protein 2 OS=Homo sapiens GN=STXBP2 PE=1 SV=2	STXB2_HUMAN	66	6.52	Homo sapiens	0	0	0	0	0	0	0	0	0	0	0	0	0	0	0	0.000162908	0	0	0	0	0	0	0	0	0	0	0	0	0	0
458	T-complex protein 1 subunit zeta OS=Homo sapiens GN=CCT6A PE=1 SV=3	TCPZ_HUMAN	58	6.65	Homo sapiens	0	0	0	0	0	0	0	0	0	0	0	0	0	0	0	0	0	0	0	0	0	0	0	0.0003122	0	0	0	0	0	0
459	Secretogranin-1 OS=Homo sapiens GN=CHGB PE=1 SV=2	SCG1_HUMAN	78	4.74	Homo sapiens	0	0	0	0	0	0	0	0	0	0	0.000358422	0.000139351	0	0	0	0	0	0	0	0	0	0	0	0	0	0	0	0	0	0
460	Galectin-7 OS=Homo sapiens GN=LGALS7 PE=1 SV=2	LEG7_HUMAN	15	7.78	Homo sapiens	0	0	0.00223753	0	0	0	0	0	0	0	0	0	0	0	0	0	0	0	0	0	0	0	0	0	0	0	0	0	0	0
461	Proteasome subunit beta type-8 OS=Homo sapiens GN=PSMB8 PE=1 SV=3	PSB8_HUMAN	30	7.49	Homo sapiens	0	0	0	0	0	0	0	0	0	0	0	0	0	0	0	0	0	0	0	0	0.000456458	0.000494594	0	0	0	0	0	0	0	0
462	Alpha-soluble NSF attachment protein OS=Homo sapiens GN=NAPA PE=1 SV=3	SNAA_HUMAN	33	5.02	Homo sapiens	0	0	0	0	0	0	0	0	0	0	0	0	0	0	0	0	0	0	0	0	0	0	0	0.000180835	0	0	0	0.000205706	0	0
463	Laminin subunit beta-1 OS=Homo sapiens GN=LAMB1 PE=1 SV=2	LAMB1_HUMAN	198	4.57	Homo sapiens	0	0	0	0	0	0	0	0	0	0	0	0	0	0	0	0	0	0	0	0	5.08999e-05	0	0	0	0	0	0	0	0	0
464	Bone morphogenetic protein 1 OS=Homo sapiens GN=BMP1 PE=1 SV=2	BMP1_HUMAN	111	6.89	Homo sapiens	7.98944e-05	0	0	0	0	0	0	0	0	0	0	0	0	0	0	0	0	0	0	0	0	0	0	0	0	0	0	0	0	0
465	Rho-associated protein kinase 2 OS=Homo sapiens GN=ROCK2 PE=1 SV=4	ROCK2_HUMAN	161	5.84	Homo sapiens	0	0	0	0	0	0	0	0	0	0	0	0	0	0	0	0	0	0	0	0	0	0	0	3.70655e-05	0	0	0	0	0	0
466	Four and a half LIM domains protein 1 OS=Homo sapiens GN=FHL1 PE=1 SV=4	FHL1_HUMAN	36	9.15	Homo sapiens	0	0	0	0	0	0	0	0	0	0	0	0	0	0	0	0.000278359	0	0	0	0	0	0	0	0	0	0	0	0.000184264	0	0
467	Nucleosome assembly protein 1-like 1 OS=Homo sapiens GN=NAP1L1 PE=1 SV=1	NP1L1_HUMAN	45	4.09	Homo sapiens	0	0	0	0	0	0	0	0	0	0	0	0	0	0	0	0	0	0	0	0	0	0	0	0	0	0	0	0.000150851	0	0
468	Neutrophil gelatinase-associated lipocalin OS=Homo sapiens GN=LCN2 PE=1 SV=2	NGAL_HUMAN	23	9.24	Homo sapiens	0	0	0.000878919	0	0	0	0	0	0	0	0	0	0	0	0	0	0	0	0	0	0	0	0	0	0	0	0	0	0	0
469	Dihydropyrimidinase-related protein 2 OS=Homo sapiens GN=DPYSL2 PE=1 SV=1	DPYL2_HUMAN	62	6.33	Homo sapiens	0	0	0	0	0	0	0	0	0	0	0	0	0	0	0	0	0	0	0	0	0	0.000236148	0	0	0	0	0	0	0	0
470	Protein S100-A11 OS=Homo sapiens GN=S100A11 PE=1 SV=2	S10AB_HUMAN	12	7.25	Homo sapiens	0	0	0.00167384	0	0	0	0	0	0	0	0	0	0	0	0	0	0	0	0	0	0	0	0	0	0	0	0	0	0	0
471	Protein diaphanous homolog 1 OS=Homo sapiens GN=DIAPH1 PE=1 SV=2	DIAP1_HUMAN	141	5.07	Homo sapiens	0	0	0	0	0	0	0	0	0	0	0	0	0	0	0	0	0	0	0	0	0	0	0	8.42167e-05	0	0	0	0	0	0
472	Trypsin-2 OS=Homo sapiens GN=PRSS2 PE=1 SV=1	TRY2_HUMAN	26	4.53	Homo sapiens	0	0	0	0	0	0	0	0	0	0	0	0	0	0	0	0	0	0	0	0	0	0	0	0	0	0	0.0002827	0	0	0
473	14-3-3 protein sigma OS=Homo sapiens GN=SFN PE=1 SV=1	1433S_HUMAN	28	4.39	Homo sapiens	0	0	0.00166039	0	0	0	0	0	0	0	0	0	0	0	0	0	0	0	0	0	0	0	0	0	0	0	0	0	0	0
474	Osteopontin OS=Homo sapiens GN=SPP1 PE=1 SV=1	OSTP_HUMAN	35	4.15	Homo sapiens	0	0	0	0	0	0	0	0	0	0	0	0	0	0	0	0	0	0	0	0	0	0	0	0	0	0	0	0.000189529	0	0
475	Inverted formin-2 OS=Homo sapiens GN=INF2 PE=1 SV=2	INF2_HUMAN	136	5.03	Homo sapiens	0	0	0	0	0	0	0	0	0	0	0	0	0	0	0	0	0	0	0	0	0	0	0	0	0	0	0	4.87758e-05	0	0
476	T-complex protein 1 subunit theta OS=Homo sapiens GN=CCT8 PE=1 SV=4	TCPQ_HUMAN	60	5.3	Homo sapiens	0	0	0	0	0	0	0	0	0	0	0	0	0	0	0	0	0	0	0	0	0	0.000124066	0.000114777	0	0	0	0	0.00022314	0	0
477	Brain acid soluble protein 1 OS=Homo sapiens GN=BASP1 PE=1 SV=2	BASP1_HUMAN	23	4.3	Homo sapiens	0	0	0	0	0	0	0	0	0	0.000496342	0	0	0	0	0	0	0	0	0	0	0	0	0	0	0	0	0	0	0	0
478	Protein phosphatase 1A OS=Homo sapiens GN=PPM1A PE=1 SV=1	PPM1A_HUMAN	42	5.02	Homo sapiens	0	0	0	0	0	0	0	0	0	0	0	0	0	0	0	0	0	0	0	0	0	0	0.000167329	0	0	0	0	0	0	0
479	Complement C1r subcomponent-like protein OS=Homo sapiens GN=C1RL PE=1 SV=2	C1RL_HUMAN	53	7.2	Homo sapiens	0	0	0	0	0	0	0	0	0	0	0	0	0	0	0	0	0	0	0	0	0.00046061	0	0	0	0	0	0	0	0	0
480	Plakophilin-1 OS=Homo sapiens GN=PKP1 PE=1 SV=2	PKP1_HUMAN	83	9.41	Homo sapiens	0	0	0.000204134	0	0	0	0	0	0	0	0	0	0	0	0	0	0	0	0	0	0	0	0	0	0	0	0	0	0	0
481	Prelamin-A/C OS=Homo sapiens GN=LMNA PE=1 SV=1	LMNA_HUMAN	74	7.01	Homo sapiens	0	0	8.7131e-05	0	0	0	0	0	0	0	0	0	0	0	0	0	0	0	0	0	0	0	0	0	0	0	0	0	0	0
482	Extended synaptotagmin-1 OS=Homo sapiens GN=ESYT1 PE=1 SV=1	ESYT1_HUMAN	123	5.61	Homo sapiens	0	0	0	0	0	0	0	0	0	0	0	0	0	0	0	0	0	0	0	0	0	0	0	0	0	0	0	0.000110379	0	0
483	Late cornified envelope protein 1B OS=Homo sapiens GN=LCE1B PE=1 SV=1	LCE1B_HUMAN	12	8.4	Homo sapiens	0	0	0.000805962	0	0	0	0	0	0	0	0	0	0	0	0	0	0	0	0	0	0	0	0	0	0	0	0	0	0	0
484	Insulin-like growth factor-binding protein 1 OS=Homo sapiens GN=IGFBP1 PE=1 SV=1	IBP1_HUMAN	28	4.86	Homo sapiens	0	0	0	0	0	0	0	0	0	0	0.000252622	0	0	0	0	0	0	0	0	0	0	0	0	0	0	0	0	0	0	0
485	Ras-related protein Rab-14 OS=Homo sapiens GN=RAB14 PE=1 SV=4	RAB14_HUMAN	24	6.13	Homo sapiens	0	0	0	0	0	0	0	0	0	0	0	0	0	0	0	0	0	0	0	0	0	0	0.000292825	0	0	0	0	0	0	0
486	Annexin A11 OS=Homo sapiens GN=ANXA11 PE=1 SV=1	ANX11_HUMAN	54	7.77	Homo sapiens	0	0	0	0	0	0	0	0	0	0	0	0	0	0	0	0.000185572	0	0	0	0	0	0	0	0	0	0	0	0	0	0
487	Drebrin-like protein OS=Homo sapiens GN=DBNL PE=1 SV=1	DBNL_HUMAN	48	4.72	Homo sapiens	0	0	0	0	0	0	0	0	0	0	0	0	0	0	0	0	0	0	0	0	0	0	0	0	0	0	0	0.000279621	0	0
488	Ras-related protein Rab-8A OS=Homo sapiens GN=RAB8A PE=1 SV=1	RAB8A_HUMAN	24	9.54	Homo sapiens	0	0	0	0	0	0	0	0	0	0	0	0	0	0	0	0	0	0	0	0	0	0	0	0.000248648	0	0	0	0	0	0
489	Dermatopontin OS=Homo sapiens GN=DPT PE=1 SV=2	DERM_HUMAN	24	4.44	Homo sapiens	0	0	0	0	0	0	0	0	0	0	0	0	0	0	0	0	0	0	0	0	0	0	0	0	0	0	0	0	0.000288827	0
490	Alpha-2-macroglobulin-like protein 1 OS=Homo sapiens GN=A2ML1 PE=1 SV=3	A2ML1_HUMAN	161	5.47	Homo sapiens	0	0	0.000124759	0	0	0	0	0	0	0	0	0	0	0	0	0	0	0	0	0	0	0	0	0	0	0	0	0	0	0
491	Transforming growth factor beta-1-induced transcript 1 protein OS=Homo sapiens GN=TGFB1I1 PE=1 SV=2	TGFI1_HUMAN	50	7.03	Homo sapiens	0	0	0	0	0	0	0	0	0	0	0	0	0	0	0	0	0	0	0	0	0	0	0	0	0	0	0	0.000404202	0	0
492	ATPase inhibitor, mitochondrial OS=Homo sapiens GN=ATPIF1 PE=1 SV=1	ATIF1_HUMAN	12	10.05	Homo sapiens	0	0	0	0	0	0	0	0	0	0	0	0	0	0	0	0	0	0	0	0	0	0	0	0	0	0	0	0	0	0.000884254
493	Protocadherin Fat 2 OS=Homo sapiens GN=FAT2 PE=1 SV=2	FAT2_HUMAN	479	4.79	Homo sapiens	0	0	0	0	0	0	0	0	0	0	0	0	0	0	0	0	0	0	0	0	0	0	0	0	1.61419e-05	0	0	0	0	0
494	72 kDa type IV collagenase OS=Homo sapiens GN=MMP2 PE=1 SV=2	MMP2_HUMAN	74	5.09	Homo sapiens	0	0	0	0	0	0	0	0	0	0	0	0	0	0	0	0	0	0	0	0	0	0	0	0	0	0	0	0.000183016	0	0
495	Poly(rC)-binding protein 1 OS=Homo sapiens GN=PCBP1 PE=1 SV=2	PCBP1_HUMAN	37	7.11	Homo sapiens	0	0	0	0	0	0	0	0	0	0	0	0	0	0	0	0	0	0	0	0	0	0	0	0	0	0	0	0.000182564	0	0
496	Glutamine synthetase OS=Homo sapiens GN=GLUL PE=1 SV=4	GLNA_HUMAN	42	6.88	Homo sapiens	0	0	0.000478241	0	0	0	0	0	0	0	0	0	0	0	0	0	0	0	0	0	0	0	0	0	0	0	0	0	0	0
497	Protein POF1B OS=Homo sapiens GN=POF1B PE=1 SV=3	POF1B_HUMAN	68	6.28	Homo sapiens	0	0	9.48191e-05	0	0	0	0	0	0	0	0	0	0	0	0	0	0	0	0	0	0	0	0	0	0	0	0	0	0	0
498	Cornifin-A OS=Homo sapiens GN=SPRR1A PE=1 SV=2	SPR1A_HUMAN	10	8.6	Homo sapiens	0	0	0.00136384	0	0	0	0	0	0	0	0	0	0	0	0	0	0	0	0	0	0	0	0	0	0	0	0	0	0	0
499	Voltage-dependent anion-selective channel protein 1 OS=Homo sapiens GN=VDAC1 PE=1 SV=2	VDAC1_HUMAN	31	8.89	Homo sapiens	0	0	0.000340116	0	0	0	0	0	0	0	0	0	0	0	0	0	0	0	0	0	0	0	0	0	0	0	0	0	0	0
500	Platelet-activating factor acetylhydrolase OS=Homo sapiens GN=PLA2G7 PE=1 SV=1	PAFA_HUMAN	50	7.61	Homo sapiens	0	0	0	0	0	0	0.000182401	0	0	0	0	0	0	0	0	0	0	0	0	0	0	0	0	0	0	0	0	0	0	0
501	Sorcin OS=Homo sapiens GN=SRI PE=1 SV=1	SORCN_HUMAN	22	5.2	Homo sapiens	0	0	0	0	0	0	0	0	0	0	0	0	0	0.000296649	0	0	0	0	0	0	0	0	0	0	0	0	0	0	0	0
502	Proteasome subunit beta type-1 OS=Homo sapiens GN=PSMB1 PE=1 SV=2	PSB1_HUMAN	26	8.3	Homo sapiens	0	0	0	0	0	0	0	0	0	0	0	0	0	0	0	0	0	0	0	0	0.000258415	0	0	0	0	0	0	0	0	0
503	NAD(P) transhydrogenase, mitochondrial OS=Homo sapiens GN=NNT PE=1 SV=3	NNTM_HUMAN	114	8.21	Homo sapiens	0	0	0	0	0	0	0	0	0	0	0	0	0	0	0	0	0	0	0	0	0	0	0	0	0	0	0	5.95464e-05	0	0
504	Hexokinase-1 OS=Homo sapiens GN=HK1 PE=1 SV=3	HXK1_HUMAN	102	6.78	Homo sapiens	0	0	0	0	0	0	0	0	0	0	0	0	0	0	0	0	0	0	0	0	0	0	0	0	0	0	0	0.000132776	0	0
505	Minor histocompatibility protein HA-1 OS=Homo sapiens GN=HMHA1 PE=1 SV=2	HMHA1_HUMAN	125	6	Homo sapiens	0	0	0	0	0	0	0	0	0	0	0	0	0	0	0	0	0	0	0	0	0	0	0	0	0	0	0	5.40389e-05	0	0
506	Microtubule-associated protein 1A OS=Homo sapiens GN=MAP1A PE=1 SV=6	MAP1A_HUMAN	30	4.85	Homo sapiens	0	0	0	0	0	0	0	0	0.000355282	0	0	0	0	0	0	0	0	0	0	0	0	0	0	0	0	0	0	0	0	0
507	Grancalcin OS=Homo sapiens GN=GCA PE=1 SV=2	GRAN_HUMAN	24	4.82	Homo sapiens	0	0	0	0	0	0	0	0	0	0.000495848	0	0	0	0	0	0	0	0	0	0	0	0	0	0	0	0	0	0	0	0
508	Tyrosine-protein kinase BTK OS=Homo sapiens GN=BTK PE=1 SV=3	BTK_HUMAN	76	7.86	Homo sapiens	0	0	0	0	0	0	0	0	0	0	0	0	0	0	0	0	0	0	0	0	0	0	0	0	0	0	0	0.000176603	0	0
509	Involucrin OS=Homo sapiens GN=IVL PE=1 SV=2	INVO_HUMAN	68	4.3	Homo sapiens	0	0	0.000192016	0	0	0	0	0	0	0	0	0	0	0	0	0	0	0	0	0	0	0	0	0	0	0	0	0	0	0
510	Late cornified envelope protein 2B OS=Homo sapiens GN=LCE2B PE=2 SV=1	LCE2B_HUMAN	11	8.13	Homo sapiens	0	0	0.00122516	0	0	0	0	0	0	0	0	0	0	0	0	0	0	0	0	0	0	0	0	0	0	0	0	0	0	0
511	Cellular retinoic acid-binding protein 2 OS=Homo sapiens GN=CRABP2 PE=1 SV=2	RABP2_HUMAN	16	5.07	Homo sapiens	0	0	0.000413085	0	0	0	0	0	0	0	0	0	0	0	0	0	0	0	0	0	0	0	0	0	0	0	0	0	0	0
512	Integrin alpha-2 OS=Homo sapiens GN=ITGA2 PE=1 SV=1	ITA2_HUMAN	129	4.95	Homo sapiens	0	0	0	0	0	0	0	0	0	0	0	0	0	0	0	7.8928e-05	0	0	0	0	0	0	0	0	0	0	0	0	0	0
513	Serine/threonine-protein phosphatase 2A 65 kDa regulatory subunit A alpha isoform OS=Homo sapiens GN=PPP2R1A PE=1 SV=4	2AAA_HUMAN	65	4.75	Homo sapiens	0	0	0	0	0	0	0	0	0	0	0	0	0	0	0	0	0	0	0	0	0	0	0	9.18084e-05	0	0	0	0	0	0
514	Ras-related protein Rab-5C OS=Homo sapiens GN=RAB5C PE=1 SV=2	RAB5C_HUMAN	23	8.61	Homo sapiens	0	0	0	0	0	0	0	0	0	0	0	0	0	0	0	0	0	0	0	0	0	0	0	0	0	0	0	0.000583557	0	0
515	Protein S100-A2 OS=Homo sapiens GN=S100A2 PE=1 SV=3	S10A2_HUMAN	11	4.42	Homo sapiens	0	0	0.000901277	0	0	0	0	0	0	0	0	0	0	0	0	0	0	0	0	0	0	0	0	0	0	0	0	0	0	0
516	RAS guanyl-releasing protein 2 OS=Homo sapiens GN=RASGRP2 PE=1 SV=1	GRP2_HUMAN	69	7.85	Homo sapiens	0	0	0	0	0	0	0	0	0	0	0	0	0	0	0	0	0	0	0	0	0	0	0	0	0	0	0	9.83811e-05	0	0
517	Kallikrein-10 OS=Homo sapiens GN=KLK10 PE=1 SV=3	KLK10_HUMAN	30	8.67	Homo sapiens	0	0	0.000220312	0	0	0	0	0	0	0	0	0	0	0	0	0	0	0	0	0	0	0	0	0	0	0	0	0	0	0
518	Dynein light chain 1, cytoplasmic OS=Homo sapiens GN=DYNLL1 PE=1 SV=1	DYL1_HUMAN	10	7.5	Homo sapiens	0	0	0.000660937	0	0	0	0	0	0	0	0	0	0	0	0	0	0	0	0	0	0	0	0	0	0	0	0	0	0	0
519	Hemoglobin subunit gamma-1 OS=Homo sapiens GN=HBG1 PE=1 SV=2	HBG1_HUMAN	16	7.23	Homo sapiens	0	0.00148184	0	0	0	0	0	0	0	0	0	0	0	0	0	0	0	0	0	0	0	0	0	0	0	0	0	0	0	0
520	Serpin B13 OS=Homo sapiens GN=SERPINB13 PE=1 SV=2	SPB13_HUMAN	44	5.47	Homo sapiens	0	0	0.000146539	0	0	0	0	0	0	0	0	0	0	0	0	0	0	0	0	0	0	0	0	0	0	0	0	0	0	0
521	Thymidine phosphorylase OS=Homo sapiens GN=TYMP PE=1 SV=2	TYPH_HUMAN	50	5.19	Homo sapiens	0	0	0.000140581	0	0	0	0	0	0	0	0	0	0	0	0	0	0	0	0	0	0	0	0	0	0	0	0	0	0	0
522	Prothymosin alpha OS=Homo sapiens GN=PTMA PE=1 SV=2	PTMA_HUMAN	12	3.41	Homo sapiens	0	0	0	0	0	0	0	0	0	0.000991696	0	0	0	0	0	0	0	0	0	0	0	0	0	0	0	0	0	0	0	0
523	Thrombospondin-2 OS=Homo sapiens GN=THBS2 PE=1 SV=2	TSP2_HUMAN	130	4.41	Homo sapiens	0	0	0	0	0	0	0	0	0	0	0	0	0	0	0	0	0	0	0	0	8.04803e-05	0	0	0	0	0	0	0	0	0
524	cAMP-dependent protein kinase type I-alpha regulatory subunit OS=Homo sapiens GN=PRKAR1A PE=1 SV=1	KAP0_HUMAN	43	5	Homo sapiens	0	0	0	0	0	0	0	0	0	0	0	0	0	0	0	0	0	0	0	0	0	0	0	0	0	0	0	0.00015709	0	0
[truncated: 27 more columns]

## Sheet: pI average 5 indiv
#DOTAP, Samples Report created on 01/07/2016						DOTAP_CTRL					DOTAP_Glioblastoma					DOTAP_Lung					DOTAP_Meningioma					DOTAP_Mieloma					DOTAP_Pancreas
						80.6681	79.3133	99.7025	96.4236	98.6706	80.7617	76.2862	76.893	61.7245	59.7522	95.7822	83.8017	84.9848	105.581	96.9016	64.6696	70.5437	73.7501	68.8956	46.4911	74.8179	90.7838	95.8553	110.906	86.3209	94.6123	89.3777	99.1341	90.9511	56.1125
#	Identified Proteins (524)	Accession Number	Molecular Weight /kDa	pI	Taxonomy	DOTAP_CTRL_1	DOTAP_CTRL_2	DOTAP_CTRL_3	DOTAP_CTRL_4	DOTAP_CTRL_5	DOTAP_Glioblastoma_1	DOTAP_Glioblastoma_2	DOTAP_Glioblastoma_3	DOTAP_Glioblastoma_4	DOTAP_Glioblastoma_5	DOTAP_Lung_1	DOTAP_Lung_2	DOTAP_Lung_3	DOTAP_Lung_4	DOTAP_Lung_5	DOTAP_Meningioma_1	DOTAP_Meningioma_2	DOTAP_Meningioma_3	DOTAP_Meningioma_4	DOTAP_Meningioma_5	DOTAP_Mieloma_1	DOTAP_Mieloma_2	DOTAP_Mieloma_3	DOTAP_Mieloma_4	DOTAP_Mieloma_5	DOTAP_Pancreas_1	DOTAP_Pancreas_2	DOTAP_Pancreas_3	DOTAP_Pancreas_4	DOTAP_Pancreas_5
1	Apolipoprotein B-100 OS=Homo sapiens GN=APOB PE=1 SV=2	APOB_HUMAN	516	7.04	Homo sapiens	0.00116375	0.00156933	0.0011468	0.0152078	0.0161353	0.0194459	0.0240803	0.0203522	0.0224933	0.02511	0.00277149	0.00258423	0.0023771	0.00500792	0.00563723	0.0191377	0.0262872	0.028005	0.0227149	0.0206519	0.00886275	0.00650504	0.00769204	0.0108546	0.00601435	0.0015841	0.00176545	0.00184458	0.00463513	0.00771814
2	Serum albumin OS=Homo sapiens GN=ALB PE=1 SV=2	ALBU_HUMAN	69	6.21	Homo sapiens	0.0277141	0.023972	0.0283723	0.0524589	0.0491299	0.0584681	0.0769515	0.0593536	0.0543806	0.0497293	0.035208	0.0463486	0.0427197	0.0410383	0.0434916	0.0649107	0.0534941	0.0889494	0.0552291	0.0613341	0.0197921	0.0268763	0.0232358	0.0156869	0.0200388	0.0384479	0.0361674	0.0583824	0.0302485	0.0381604			45	0.0322428	0.0512445	0.0367143	0.0465286	0.0481417	0.0612078	0.0791324	0.0723995	0.0809144	0.0789911	0.123231
3	Vitronectin OS=Homo sapiens GN=VTN PE=1 SV=1	VTNC_HUMAN	54	5.54	Homo sapiens	0.0424399	0.038591	0.041191	0.0612962	0.0579852	0.0433318	0.0310535	0.0311119	0.0384736	0.0341621	0.0520737	0.055708	0.0477196	0.0701146	0.0589862	0.0351422	0.0339476	0.0309588	0.0353988	0.0390017	0.0156662	0.0170781	0.0198982	0.00967359	0.011296	0.0363418	0.0342829	0.0255231	0.0400531	0.0447176			117	0.120495	0.133895	0.145871	0.092925	0.111985	0.149659	0.164485	0.157659	0.188601	0.184041	0.223133
4	Prothrombin OS=Homo sapiens GN=F2 PE=1 SV=2	THRB_HUMAN	70	5.7	Homo sapiens	0.064514	0.0697448	0.055165	0.0238791	0.022677	0.0184394	0.0200983	0.0183011	0.0102754	0.00972212	0.0292055	0.0320365	0.0332599	0.0288733	0.0279832	0.0130352	0.0139816	0.0126537	0.0169451	0.0194035	0.0292973	0.0222519	0.0293043	0.0125404	0.016155	0.0494744	0.0416231	0.0420745	0.0466319	0.0348023			188	0.287815	0.332326	0.332343	0.214572	0.229421	0.269011	0.285408	0.309663	0.30385	0.322839	0.345296
5	Complement C4-A OS=Homo sapiens GN=C4A PE=1 SV=2	CO4A_HUMAN	193	7.08	Homo sapiens	0.0233296	0.0261408	0.0231708	0.0047278	0.0040953	0.00487694	0.00442304	0.00356021	0.00293817	0.00316792	0.0123134	0.0120311	0.013615	0.00874949	0.0106392	0.00365641	0.00553473	0.00416588	0.00424179	0.00343138	0.00787594	0.00826363	0.0130435	0.00470808	0.00436255	0.0207933	0.0169136	0.0182397	0.0103681	0.00709957			304	0.48871	0.525851	0.550222	0.437258	0.438029	0.508704	0.534849	0.572912	0.534437	0.552213	0.631927
6	Complement C3 OS=Homo sapiens GN=C3 PE=1 SV=2	CO3_HUMAN	187	6.34	Homo sapiens	0.00425696	0.00520744	0.00391943	0.0108141	0.0118191	0.00904244	0.00833351	0.00792322	0.0132848	0.0129927	0.0150754	0.0135347	0.0124227	0.0139559	0.0145194	0.00711789	0.00774083	0.00928253	0.00755289	0.00665877	0.0221995	0.0119444	0.0114374	0.0197402	0.0125752	0.00489862	0.00494618	0.00395564	0.00674651	0.00668189			410	0.873506	0.87926	0.874808	0.820746	0.816232	0.857497	0.867768	0.872593	0.848349	0.862878	0.901581
7	C4b-binding protein alpha chain OS=Homo sapiens GN=C4BPA PE=1 SV=2	C4BPA_HUMAN	67	7.31	Homo sapiens	0.0585261	0.0570928	0.0471838	0.0261696	0.0231333	0.0160327	0.0144876	0.0134038	0.00515906	0.0048769	0.0165198	0.0161769	0.0208444	0.0173001	0.022068	0.00553013	0.015678	0.00964847	0.0167057	0.0181043	0.0294649	0.0262108	0.0381468	0.0295964	0.0315731	0.0412291	0.0387077	0.0287541	0.0366947	0.0416651			524	1	1	1	1	1	1	1	1	1	1	1
8	Clusterin OS=Homo sapiens GN=CLU PE=1 SV=1	CLUS_HUMAN	52	6.21	Homo sapiens	0.0452063	0.0415004	0.0368209	0.0111782	0.00993814	0.0122548	0.0112602	0.0101908	0.00861388	0.0072911	0.0232946	0.0294726	0.0338737	0.0233736	0.0255983	0.0104189	0.0116298	0.00947387	0.00818917	0.00928429	0.0202589	0.029954	0.0332412	0.0156633	0.0144094	0.0323209	0.0322379	0.0237344	0.0283333	0.0166822
9	Fibrinogen beta chain OS=Homo sapiens GN=FGB PE=1 SV=2	FIBB_HUMAN	56	8.38	Homo sapiens	0.0150978	0.0116868	0.0115967	0.0110606	0.0147297	0.00147997	0.00302504	0.00132543	0.00810693	0.00813214	0	0.00105486	0.0014679	0.00118473	0.0012267	0.00258485	0.00329752	0.00347429	0.000827142	0.000340747	0.0364146	0.0220307	0.0188172	0.0363191	0.126053	0.0437894	0.0634346	0.0464009	0.0728358	0.0357829
10	Fibrinogen alpha chain OS=Homo sapiens GN=FGA PE=1 SV=2	FIBA_HUMAN	95	5.87	Homo sapiens	0.00791366	0.00568809	0.00626203	0.0052539	0.0069025	0.00126099	0.00170622	0.000742517	0.00511036	0.00587003	0.00110011	0.000950096	0.0013667	0.00132783	0.00112482	0.000980513	0.0020387	0.00152209	0.00104607	0.00124385	0.0115841	0.011518	0.00816412	0.0154154	0.0551524	0.0195829	0.0308834	0.0161065	0.0320303	0.0154167
11	Inter-alpha-trypsin inhibitor heavy chain H2 OS=Homo sapiens GN=ITIH2 PE=1 SV=2	ITIH2_HUMAN	106	6.85	Homo sapiens	0.00755073	0.00902489	0.00607511	0.00424144	0.00439867	0.00718465	0.00701439	0.00684989	0.00595542	0.00634237	0.0114257	0.0143434	0.0135489	0.0131602	0.0128577	0.00871076	0.00727933	0.0048203	0.0080723	0.0102041	0.0127162	0.0135348	0.0118099	0.00584106	0.00742645	0.00920593	0.00587644	0.00828001	0.0146398	0.00739769
12	Inter-alpha-trypsin inhibitor heavy chain H1 OS=Homo sapiens GN=ITIH1 PE=1 SV=3	ITIH1_HUMAN	101	6.78	Homo sapiens	0.00614133	0.00700559	0.00560483	0.00345472	0.00327717	0.00748171	0.00646589	0.00619531	0.00427736	0.0035414	0.011543	0.016163	0.0160389	0.0200213	0.0153999	0.00816889	0.00733883	0.00362448	0.00475523	0.00502922	0.0183943	0.0155263	0.0129812	0.0058911	0.0097841	0.00878913	0.00683786	0.00902014	0.015131	0.00653487				DOTAP_CTRL					DOTAP_Glioblastoma					DOTAP_Lung
13	Apolipoprotein A-I OS=Homo sapiens GN=APOA1 PE=1 SV=1	APOA1_HUMAN	31	5.5	Homo sapiens	0.0123985	0.0117996	0.0104908	0.0237787	0.025392	0.0418138	0.0705179	0.0623633	0.0611517	0.0535955	0.0155992	0.0181134	0.0193537	0.0161026	0.0171942	0.0317009	0.0401238	0.0552511	0.064159	0.0610647	0.0427691	0.0292409	0.0310842	0.0203794	0.0310202	0.0139768	0.0140582	0.0117066	0.0201225	0.0169508			N° prot	DOTAP_CTRL_1	DOTAP_CTRL_2	DOTAP_CTRL_3	DOTAP_CTRL_4	DOTAP_CTRL_5	DOTAP_Glioblastoma_1	DOTAP_Glioblastoma_2	DOTAP_Glioblastoma_3	DOTAP_Glioblastoma_4	DOTAP_Glioblastoma_5	DOTAP_Lung_1
14	Apolipoprotein A-IV OS=Homo sapiens GN=APOA4 PE=1 SV=3	APOA4_HUMAN	45	5.05	Homo sapiens	0.0419984	0.0454788	0.0290691	0.0109544	0.00983333	0.0115161	0.0158276	0.0119775	0.0135633	0.0126991	0.01299	0.015841	0.0156732	0.0129867	0.0179575	0.0117129	0.0130264	0.0113486	0.0106929	0.0134659	0.0300334	0.0379382	0.0394203	0.0131021	0.0183674	0.00900209	0.010625	0.00993907	0.0207384	0.00510641		>9	45	0.0322428	0.0512445	0.0367143	0.0465286	0.0481417	0.0612078	0.0791324	0.0723995	0.0809144	0.0789911	0.123231
[truncated: 510 more rows]
[truncated: 19 more columns]

## Sheet: Top25 5 indiv
#DOTAP, Samples Report created on 01/07/2016						DOTAP_CTRL					DOTAP_Glioblastoma					DOTAP_Lung					DOTAP_Meningioma					DOTAP_Mieloma					DOTAP_Pancreas
[truncated: 526 more rows]
[truncated: 48 more columns]

## Sheet: Category
#DOTAP, Samples Report created on 01/07/2016							DOTAP_CTRL					DOTAP_Glioblastoma					DOTAP_Lung					DOTAP_Meningioma					DOTAP_Mieloma					DOTAP_Pancreas							Acute phase
[truncated: 526 more rows]
[truncated: 74 more columns]
