# Supplementary material for: Disease-specific protein corona sensor arrays may have disease detection capacity
Source: Royal Society of Chemistry journal article supplement (doi:10.1039/c9nh00097f), 2019-01-01
Supplement: c9nh00097f4.xlsx [file c9nh00097f4.xlsx]

## Sheet: Samples Report of Brain
Brain tumor						CHOL
						Spectral counts															Percent coverage															Unique peptide
#	Identified Proteins (264)	Accession Number	Molecular Weight	pI	Taxonomy	2016-11-16_CHOLPC_BrainCancer_A_01	2016-11-16_CHOLPC_BrainCancer_A_02	2016-11-16_CHOLPC_BrainCancer_A_03	2016-11-16_CHOLPC_BrainCancer_B_01	2016-11-16_CHOLPC_BrainCancer_B_02	2016-11-16_CHOLPC_BrainCancer_B_03	2016-11-16_CHOLPC_BrainCancer_C_01	2016-11-16_CHOLPC_BrainCancer_C_02	2016-11-16_CHOLPC_BrainCancer_C_03	2016-11-16_CHOLPC_BrainCancer_D_01	2016-11-16_CHOLPC_BrainCancer_D_02	2016-11-16_CHOLPC_BrainCancer_D_03	2016-11-16_CHOLPC_BrainCancer_E_01	2016-11-16_CHOLPC_BrainCancer_E_02	2016-11-16_CHOLPC_BrainCancer_E_03	2016-11-16_CHOLPC_BrainCancer_A_01	2016-11-16_CHOLPC_BrainCancer_A_02	2016-11-16_CHOLPC_BrainCancer_A_03	2016-11-16_CHOLPC_BrainCancer_B_01	2016-11-16_CHOLPC_BrainCancer_B_02	2016-11-16_CHOLPC_BrainCancer_B_03	2016-11-16_CHOLPC_BrainCancer_C_01	2016-11-16_CHOLPC_BrainCancer_C_02	2016-11-16_CHOLPC_BrainCancer_C_03	2016-11-16_CHOLPC_BrainCancer_D_01	2016-11-16_CHOLPC_BrainCancer_D_02	2016-11-16_CHOLPC_BrainCancer_D_03	2016-11-16_CHOLPC_BrainCancer_E_01	2016-11-16_CHOLPC_BrainCancer_E_02	2016-11-16_CHOLPC_BrainCancer_E_03	CHOL_A	CHOL_A	CHOL_A	CHOL_B	CHOL_B	CHOL_B	CHOL_C	CHOL_C	CHOL_C	CHOL_D	CHOL_D	CHOL_D	CHOL_E	CHOL_E
1	Apolipoprotein B-100 OS=Homo sapiens GN=APOB PE=1 SV=2	APOB_HUMAN	516	7.04	Homo sapiens	54	56	61	66	71	66	48	51	44	140	139	127	141	140	133	0.14	0.13	0.13	0.15	0.15	0.15	0.11	0.12	0.1	0.26	0.25	0.25	0.28	0.28	0.29	52	48	50	54	57	56	45	45	41	94	93	90	101	101
2	Ig gamma-1 chain C region OS=Homo sapiens GN=IGHG1 PE=1 SV=1	IGHG1_HUMAN	36	8.31	Homo sapiens	52	60	59	61	51	62	49	51	52	104	115	104	134	126	125	0.54	0.56	0.59	0.55	0.52	0.55	0.56	0.56	0.53	0.57	0.59	0.59	0.65	0.63	0.75	14	15	17	15	14	14	16	15	14	17	18	18	19	18
3	Complement C3 OS=Homo sapiens GN=C3 PE=1 SV=2	CO3_HUMAN	187	6.34	Homo sapiens	27	24	26	42	42	38	21	24	25	43	45	41	59	61	55	0.18	0.16	0.16	0.27	0.25	0.23	0.14	0.14	0.15	0.25	0.26	0.22	0.38	0.35	0.33	25	23	22	37	36	32	19	22	22	35	38	31	50	49
4	Vitronectin OS=Homo sapiens GN=VTN PE=1 SV=1	VTNC_HUMAN	54	5.54	Homo sapiens	4	5	6	5	3	3	4	0	3	6	5	5	5	3	2	0.11	0.11	0.11	0.11	0.077	0.088	0.077	0	0.046	0.11	0.11	0.11	0.11	0.059	0.046	4	4	4	4	3	3	3	0	2	4	4	4	4	2
5	Ig kappa chain C region OS=Homo sapiens GN=IGKC PE=1 SV=1	IGKC_HUMAN	12	5.68	Homo sapiens	29	34	34	28	27	29	24	23	21	64	60	64	75	83	70	0.8	0.87	0.8	0.84	0.91	0.84	0.81	0.87	0.87	0.89	0.89	0.82	0.97	0.97	0.97	6	8	8	8	9	8	6	7	7	9	9	6	11	12
6	Keratin, type II cytoskeletal 1 OS=Homo sapiens GN=KRT1 PE=1 SV=6	K2C1_HUMAN	66	8.33	Homo sapiens	54	56	56	53	48	47	44	43	44	61	69	61	57	62	60	0.64	0.65	0.64	0.61	0.59	0.59	0.58	0.52	0.54	0.57	0.58	0.59	0.52	0.55	0.6	37	38	37	36	34	34	32	32	32	35	35	35	32	36
7	Serum albumin OS=Homo sapiens GN=ALB PE=1 SV=2	ALBU_HUMAN	69	6.21	Homo sapiens	42	40	42	29	26	30	32	32	37	51	54	49	69	77	72	0.55	0.54	0.51	0.46	0.42	0.45	0.43	0.46	0.44	0.6	0.59	0.6	0.67	0.68	0.72	28	29	29	22	20	22	22	23	24	33	34	31	39	44
8	Ig mu chain C region OS=Homo sapiens GN=IGHM PE=1 SV=3	IGHM_HUMAN	49	6.77	Homo sapiens	49	50	46	42	40	44	38	35	33	77	88	79	45	48	47	0.39	0.41	0.39	0.37	0.37	0.4	0.35	0.27	0.33	0.41	0.35	0.42	0.46	0.44	0.46	15	16	15	14	14	15	14	11	12	16	15	17	16	17
9	C4b-binding protein alpha chain OS=Homo sapiens GN=C4BPA PE=1 SV=2	C4BPA_HUMAN	67	7.31	Homo sapiens	18	24	24	25	21	21	8	11	12	44	37	39	16	17	16	0.23	0.25	0.27	0.22	0.21	0.21	0.16	0.16	0.17	0.33	0.34	0.43	0.26	0.32	0.37	13	15	14	13	11	11	7	9	9	16	18	20	12	14
10	Complement C4-A OS=Homo sapiens GN=C4A PE=1 SV=2	CO4A_HUMAN	193	7.08	Homo sapiens	12	15	13	17	18	18	9	9	9	26	22	26	34	38	31	0.068	0.073	0.068	0.085	0.099	0.1	0.044	0.05	0.058	0.14	0.12	0.14	0.21	0.22	0.18	11	13	12	15	17	17	7	8	9	22	18	22	29	30
11	Ig gamma-2 chain C region OS=Homo sapiens GN=IGHG2 PE=1 SV=2	IGHG2_HUMAN	36	7.66	Homo sapiens	44	40	44	59	48	49	25	31	29	65	67	61	78	70	72	0.41	0.44	0.44	0.44	0.41	0.44	0.28	0.33	0.31	0.48	0.48	0.51	0.55	0.55	0.67	7	8	7	8	7	8	4	5	6	9	7	8	9	9
12	Keratin, type I cytoskeletal 9 OS=Homo sapiens GN=KRT9 PE=1 SV=3	K1C9_HUMAN	62	4.89	Homo sapiens	31	33	30	33	30	31	35	26	20	35	37	39	44	44	39	0.51	0.51	0.52	0.53	0.51	0.52	0.43	0.41	0.33	0.45	0.49	0.53	0.75	0.71	0.71	24	23	23	23	22	22	21	19	15	22	24	24	29	28
13	Fibrinogen beta chain OS=Homo sapiens GN=FGB PE=1 SV=2	FIBB_HUMAN	56	8.38	Homo sapiens	8	7	7	15	13	15	3	4	5	22	26	24	24	23	22	0.23	0.2	0.2	0.33	0.3	0.37	0.075	0.096	0.12	0.35	0.37	0.37	0.4	0.41	0.36	8	7	7	14	12	15	3	4	5	14	15	15	15	16
14	Keratin, type I cytoskeletal 10 OS=Homo sapiens GN=KRT10 PE=1 SV=6	K1C10_HUMAN	59	4.88	Homo sapiens	23	25	21	22	24	24	21	23	20	26	27	26	26	27	22	0.38	0.35	0.31	0.42	0.38	0.44	0.34	0.34	0.29	0.38	0.39	0.45	0.44	0.42	0.41	20	21	18	20	19	22	18	20	17	20	23	22	22	21
15	Complement factor H OS=Homo sapiens GN=CFH PE=1 SV=4	CFAH_HUMAN	139	6.59	Homo sapiens	7	7	9	14	12	13	12	11	9	18	20	21	17	18	10	0.079	0.083	0.097	0.13	0.096	0.11	0.11	0.098	0.09	0.14	0.13	0.16	0.16	0.16	0.11	6	7	9	11	8	10	10	9	9	14	12	14	15	16
16	Apolipoprotein D OS=Homo sapiens GN=APOD PE=1 SV=1	APOD_HUMAN	21	4.79	Homo sapiens	6	11	9	10	12	9	10	7	11	19	16	14	17	22	18	0.24	0.31	0.31	0.34	0.34	0.34	0.25	0.19	0.25	0.31	0.25	0.25	0.31	0.31	0.31	4	6	6	6	6	6	5	4	5	6	5	5	6	6
17	Filamin-A OS=Homo sapiens GN=FLNA PE=1 SV=4	FLNA_HUMAN	281	5.95	Homo sapiens	14	17	13	10	11	15	11	9	9	25	26	26	45	44	43	0.066	0.07	0.063	0.051	0.057	0.07	0.051	0.034	0.04	0.1	0.11	0.11	0.17	0.17	0.18	13	14	12	10	11	15	11	8	9	21	23	23	35	34
18	Fibrinogen gamma chain OS=Homo sapiens GN=FGG PE=1 SV=3	FIBG_HUMAN	52	5.32	Homo sapiens	7	8	7	10	13	12	4	3	6	11	13	9	17	21	15	0.19	0.22	0.18	0.22	0.28	0.21	0.11	0.088	0.12	0.23	0.27	0.21	0.32	0.42	0.3	7	8	7	8	12	9	4	3	4	8	10	8	14	16
19	Prothrombin OS=Homo sapiens GN=F2 PE=1 SV=2	THRB_HUMAN	70	5.7	Homo sapiens	0	0	0	0	0	0	0	0	0	0	0	0	0	0	0	0	0	0	0	0	0	0	0	0	0	0	0	0	0	0	0	0	0	0	0	0	0	0	0	0	0	0	0	0
20	Alpha-2-macroglobulin OS=Homo sapiens GN=A2M PE=1 SV=3	A2MG_HUMAN	163	6.43	Homo sapiens	17	17	15	22	23	29	0	4	0	18	19	20	42	39	48	0.14	0.14	0.11	0.18	0.17	0.21	0	0.032	0	0.16	0.15	0.14	0.36	0.31	0.36	17	17	14	21	21	25	0	4	0	17	17	16	36	32
21	Immunoglobulin lambda-like polypeptide 5 OS=Homo sapiens GN=IGLL5 PE=2 SV=2	IGLL5_HUMAN	23	9.05	Homo sapiens	8	10	9	14	13	15	11	11	10	23	22	22	25	29	24	0.23	0.28	0.23	0.3	0.31	0.31	0.28	0.28	0.28	0.41	0.41	0.41	0.41	0.44	0.41	4	5	4	6	6	6	4	6	4	6	6	6	6	8
22	Keratin, type II cytoskeletal 6A OS=Homo sapiens GN=KRT6A PE=1 SV=3	K2C6A_HUMAN	60	8.16	Homo sapiens	12	13	14	13	12	13	22	15	20	20	22	22	33	32	29	0.22	0.24	0.21	0.21	0.2	0.22	0.33	0.25	0.27	0.3	0.37	0.37	0.47	0.46	0.43	10	11	9	10	9	11	17	14	16	15	18	18	27	26
23	Hyaluronan-binding protein 2 OS=Homo sapiens GN=HABP2 PE=1 SV=1	HABP2_HUMAN	63	6.52	Homo sapiens	0	0	0	0	0	0	0	0	0	0	0	0	0	0	0	0	0	0	0	0	0	0	0	0	0	0	0	0	0	0	0	0	0	0	0	0	0	0	0	0	0	0	0	0
24	Keratin, type I cytoskeletal 16 OS=Homo sapiens GN=KRT16 PE=1 SV=4	K1C16_HUMAN	51	4.69	Homo sapiens	14	13	12	16	19	15	18	21	18	23	19	23	32	34	31	0.29	0.29	0.26	0.33	0.33	0.3	0.4	0.4	0.37	0.48	0.42	0.49	0.57	0.57	0.56	11	10	10	13	14	12	14	14	13	19	15	18	21	21
25	Keratin, type II cytoskeletal 2 epidermal OS=Homo sapiens GN=KRT2 PE=1 SV=2	K22E_HUMAN	65	8.17	Homo sapiens	26	23	28	21	21	25	22	17	20	25	24	25	28	28	27	0.46	0.43	0.46	0.36	0.39	0.43	0.41	0.28	0.34	0.33	0.37	0.4	0.48	0.4	0.46	18	16	19	14	14	17	14	10	11	13	13	16	18	13
26	Ig lambda-2 chain C regions OS=Homo sapiens GN=IGLC2 PE=1 SV=1	LAC2_HUMAN	11	7.34	Homo sapiens	16	17	17	20	18	19	17	16	15	24	26	23	30	30	25	0.56	0.56	0.56	0.63	0.56	0.56	0.56	0.56	0.56	0.75	0.75	0.75	0.75	0.82	0.75	2	2	2	2	2	2	2	2	2	2	2	2	2	2
27	Thrombospondin-1 OS=Homo sapiens GN=THBS1 PE=1 SV=2	TSP1_HUMAN	129	4.51	Homo sapiens	2	0	2	2	2	3	3	2	3	0	0	0	16	13	10	0.022	0	0.022	0.022	0.022	0.032	0.032	0.022	0.032	0	0	0	0.17	0.14	0.12	2	0	2	2	2	3	3	2	3	0	0	0	15	12
28	Apolipoprotein(a) OS=Homo sapiens GN=LPA PE=1 SV=1	APOA_HUMAN	501	5.77	Homo sapiens	2	0	2	27	27	29	3	5	4	23	24	21	13	9	12	0.0051	0	0.0051	0.057	0.057	0.054	0.0086	0.011	0.011	0.051	0.057	0.049	0.032	0.023	0.032	2	0	2	20	20	19	3	4	4	18	19	17	11	8
29	CD5 antigen-like OS=Homo sapiens GN=CD5L PE=1 SV=1	CD5L_HUMAN	38	5.15	Homo sapiens	13	11	13	11	13	12	10	10	10	16	14	16	14	16	15	0.38	0.38	0.38	0.38	0.39	0.39	0.3	0.3	0.3	0.41	0.38	0.41	0.42	0.43	0.44	9	9	9	9	10	10	8	7	7	12	10	12	10	11
30	Haptoglobin OS=Homo sapiens GN=HP PE=1 SV=1	HPT_HUMAN	45	6.56	Homo sapiens	11	10	10	6	7	8	6	6	7	10	15	8	20	13	20	0.3	0.29	0.29	0.22	0.23	0.24	0.15	0.2	0.22	0.3	0.3	0.24	0.41	0.37	0.42	10	10	10	6	7	7	5	6	7	10	12	8	14	12
31	Serotransferrin OS=Homo sapiens GN=TF PE=1 SV=3	TRFE_HUMAN	77	7.13	Homo sapiens	11	12	11	4	3	3	14	17	15	9	15	13	17	17	17	0.2	0.22	0.18	0.067	0.056	0.056	0.18	0.24	0.23	0.16	0.23	0.22	0.27	0.3	0.26	11	12	11	4	3	3	12	16	14	9	13	13	15	16
32	Plasminogen OS=Homo sapiens GN=PLG PE=1 SV=2	PLMN_HUMAN	91	7.25	Homo sapiens	0	0	2	9	9	7	0	0	0	12	11	14	17	14	13	0	0	0.035	0.12	0.13	0.13	0	0	0	0.17	0.14	0.17	0.21	0.17	0.15	0	0	2	7	7	6	0	0	0	8	8	10	11	9
33	Inter-alpha-trypsin inhibitor heavy chain H2 OS=Homo sapiens GN=ITIH2 PE=1 SV=2	ITIH2_HUMAN	106	6.85	Homo sapiens	0	0	0	0	0	0	0	0	0	0	0	0	3	0	0	0	0	0	0	0	0	0	0	0	0	0	0	0.039	0	0	0	0	0	0	0	0	0	0	0	0	0	0	3	0
34	Apolipoprotein A-I OS=Homo sapiens GN=APOA1 PE=1 SV=1	APOA1_HUMAN	31	5.5	Homo sapiens	6	4	5	5	4	2	3	4	3	4	6	4	5	4	5	0.23	0.19	0.22	0.18	0.14	0.094	0.14	0.18	0.15	0.18	0.24	0.18	0.24	0.15	0.21	6	4	5	4	3	2	3	4	3	4	6	4	5	4
35	Integrin beta-3 OS=Homo sapiens GN=ITGB3 PE=1 SV=2	ITB3_HUMAN	87	4.85	Homo sapiens	6	4	4	4	4	5	3	3	4	12	13	12	24	29	31	0.084	0.057	0.044	0.07	0.07	0.086	0.037	0.036	0.055	0.11	0.15	0.11	0.22	0.25	0.28	5	4	3	4	4	5	3	3	4	9	11	9	14	16
36	Fibrinogen alpha chain OS=Homo sapiens GN=FGA PE=1 SV=2	FIBA_HUMAN	95	5.87	Homo sapiens	5	4	3	10	7	7	0	2	2	4	2	2	5	4	7	0.073	0.072	0.051	0.11	0.073	0.073	0	0.029	0.029	0.057	0.024	0.025	0.06	0.057	0.077	5	4	3	7	5	5	0	2	2	4	2	2	4	4
37	Inter-alpha-trypsin inhibitor heavy chain H1 OS=Homo sapiens GN=ITIH1 PE=1 SV=3	ITIH1_HUMAN	101	6.78	Homo sapiens	0	0	0	0	0	0	0	0	0	0	0	0	0	0	2	0	0	0	0	0	0	0	0	0	0	0	0	0	0	0.02	0	0	0	0	0	0	0	0	0	0	0	0	0	0
38	Hornerin OS=Homo sapiens GN=HRNR PE=1 SV=2	HORN_HUMAN	282	10.24	Homo sapiens	8	9	9	10	8	11	8	7	7	4	14	13	20	20	18	0.056	0.056	0.043	0.055	0.048	0.06	0.046	0.041	0.045	0.029	0.072	0.069	0.11	0.11	0.086	8	9	7	8	7	9	7	6	7	4	11	10	15	16
39	Ig alpha-1 chain C region OS=Homo sapiens GN=IGHA1 PE=1 SV=2	IGHA1_HUMAN	38	6.49	Homo sapiens	3	4	5	6	5	5	4	4	4	6	7	8	10	7	16	0.1	0.13	0.16	0.15	0.15	0.12	0.13	0.13	0.13	0.19	0.3	0.26	0.37	0.28	0.48	3	4	5	5	5	4	4	4	4	5	7	7	8	6
40	Beta-2-glycoprotein 1 OS=Homo sapiens GN=APOH PE=1 SV=3	APOH_HUMAN	38	8.03	Homo sapiens	5	6	6	6	5	4	5	6	3	7	10	8	32	28	24	0.23	0.23	0.23	0.23	0.18	0.18	0.21	0.21	0.15	0.31	0.37	0.39	0.63	0.55	0.52	5	6	6	6	5	4	5	5	3	7	9	7	16	15
41	Apolipoprotein E OS=Homo sapiens GN=APOE PE=1 SV=1	APOE_HUMAN	36	5.42	Homo sapiens	5	5	5	0	0	0	3	2	2	4	0	0	6	6	8	0.15	0.15	0.15	0	0	0	0.1	0.082	0.082	0.11	0	0	0.17	0.21	0.26	5	5	5	0	0	0	3	2	2	3	0	0	5	6
42	Serum paraoxonase/arylesterase 1 OS=Homo sapiens GN=PON1 PE=1 SV=3	PON1_HUMAN	40	4.89	Homo sapiens	0	0	0	0	0	0	0	0	0	2	0	0	2	2	0	0	0	0	0	0	0	0	0	0	0.085	0	0	0.085	0.085	0	0	0	0	0	0	0	0	0	0	2	0	0	2	2
43	Vitamin K-dependent protein S OS=Homo sapiens GN=PROS1 PE=1 SV=1	PROS_HUMAN	75	5.37	Homo sapiens	0	0	0	0	0	0	0	0	0	0	0	0	0	0	0	0	0	0	0	0	0	0	0	0	0	0	0	0	0	0	0	0	0	0	0	0	0	0	0	0	0	0	0	0
44	Keratin, type II cytoskeletal 5 OS=Homo sapiens GN=KRT5 PE=1 SV=3	K2C5_HUMAN	62	7.91	Homo sapiens	12	14	15	13	13	11	15	10	15	13	17	14	20	21	20	0.19	0.21	0.2	0.18	0.19	0.14	0.23	0.16	0.21	0.15	0.28	0.23	0.27	0.32	0.26	6	8	6	7	7	5	6	6	7	5	9	6	8	9
45	Keratin, type I cytoskeletal 14 OS=Homo sapiens GN=KRT14 PE=1 SV=4	K1C14_HUMAN	52	4.81	Homo sapiens	13	14	11	16	15	15	16	20	19	22	19	21	22	20	21	0.29	0.31	0.27	0.35	0.31	0.31	0.34	0.37	0.38	0.49	0.39	0.4	0.47	0.4	0.4	4	5	4	6	4	4	6	8	8	11	8	8	10	8
46	Ceruloplasmin OS=Homo sapiens GN=CP PE=1 SV=1	CERU_HUMAN	122	5.5	Homo sapiens	0	0	0	0	0	0	0	0	0	0	0	0	2	0	0	0	0	0	0	0	0	0	0	0	0	0	0	0.023	0	0	0	0	0	0	0	0	0	0	0	0	0	0	2	0
47	Complement C5 OS=Homo sapiens GN=C5 PE=1 SV=4	CO5_HUMAN	188	6.49	Homo sapiens	0	0	0	0	2	0	0	0	0	2	2	0	4	4	2	0	0	0	0	0.012	0	0	0	0	0.011	0.011	0	0.028	0.023	0.015	0	0	0	0	2	0	0	0	0	2	2	0	4	4
48	Fibronectin OS=Homo sapiens GN=FN1 PE=1 SV=4	FINC_HUMAN	263	5.45	Homo sapiens	2	0	0	2	2	2	0	0	0	8	10	8	8	8	10	0.013	0	0	0.013	0.013	0.013	0	0	0	0.046	0.061	0.047	0.045	0.043	0.055	2	0	0	2	2	2	0	0	0	8	10	8	8	8
49	Clusterin OS=Homo sapiens GN=CLU PE=1 SV=1	CLUS_HUMAN	52	6.21	Homo sapiens	0	0	0	0	0	0	0	0	0	0	0	0	0	0	0	0	0	0	0	0	0	0	0	0	0	0	0	0	0	0	0	0	0	0	0	0	0	0	0	0	0	0	0	0
50	Ig kappa chain V-III region HAH OS=Homo sapiens PE=2 SV=1	KV312_HUMAN	14	4.59	Homo sapiens	0	0	3	2	3	2	2	0	0	9	11	9	6	5	11	0	0	0.19	0.19	0.26	0.19	0.26	0	0	0.5	0.5	0.5	0.43	0.5	0.5	0	0	2	2	2	2	2	0	0	4	4	4	3	4
51	Complement C1q subcomponent subunit C OS=Homo sapiens GN=C1QC PE=1 SV=3	C1QC_HUMAN	26	8.58	Homo sapiens	3	3	3	5	6	5	5	5	4	8	7	8	9	6	6	0.16	0.16	0.16	0.2	0.25	0.21	0.22	0.16	0.16	0.25	0.25	0.25	0.25	0.22	0.25	3	3	3	4	5	4	4	3	3	5	5	5	5	4
52	Apolipoprotein C-III OS=Homo sapiens GN=APOC3 PE=1 SV=1	APOC3_HUMAN	11	5.04	Homo sapiens	3	3	2	0	0	2	3	3	2	0	2	3	3	3	3	0.27	0.27	0.27	0	0	0.27	0.27	0.27	0.27	0	0.27	0.27	0.27	0.27	0.27	2	2	2	0	0	2	2	2	2	0	2	2	2	2
53	Immunoglobulin J chain OS=Homo sapiens GN=IGJ PE=1 SV=4	IGJ_HUMAN	18	4.87	Homo sapiens	5	5	6	4	5	3	3	5	3	6	7	5	5	6	4	0.28	0.24	0.24	0.18	0.18	0.14	0.12	0.18	0.14	0.33	0.33	0.28	0.28	0.36	0.23	4	3	4	3	3	2	2	3	2	5	5	4	4	5
54	Coagulation factor V OS=Homo sapiens GN=F5 PE=1 SV=4	FA5_HUMAN	252	5.95	Homo sapiens	4	5	5	0	0	2	0	0	0	4	5	5	7	7	6	0.021	0.024	0.025	0	0	0.0085	0	0	0	0.013	0.026	0.022	0.036	0.037	0.031	4	5	5	0	0	2	0	0	0	3	5	5	7	7
55	Actin, cytoplasmic 2 OS=Homo sapiens GN=ACTG1 PE=1 SV=1	ACTG_HUMAN	42	5.16	Homo sapiens	7	8	7	2	2	2	0	0	0	4	8	6	6	7	2	0.19	0.21	0.19	0.072	0.069	0.056	0	0	0	0.11	0.24	0.18	0.21	0.24	0.077	7	8	7	2	2	2	0	0	0	4	8	6	6	7
56	Ig gamma-3 chain C region OS=Homo sapiens GN=IGHG3 PE=1 SV=2	IGHG3_HUMAN	41	7.95	Homo sapiens	38	38	42	53	47	45	32	38	36	50	54	43	62	58	63	0.44	0.39	0.49	0.46	0.41	0.46	0.44	0.47	0.45	0.47	0.41	0.46	0.47	0.45	0.56	3	3	3	3	2	3	2	3	3	3	3	2	3	3
57	Inter-alpha-trypsin inhibitor heavy chain H3 OS=Homo sapiens GN=ITIH3 PE=1 SV=2	ITIH3_HUMAN	100	5.49	Homo sapiens	0	0	0	0	0	0	0	0	0	0	0	0	0	0	0	0	0	0	0	0	0	0	0	0	0	0	0	0	0	0	0	0	0	0	0	0	0	0	0	0	0	0	0	0
58	Ig heavy chain V-III region TRO OS=Homo sapiens PE=1 SV=1	HV301_HUMAN	13	10	Homo sapiens	3	3	0	0	0	0	0	0	0	10	0	7	6	4	7	0.24	0.24	0	0	0	0	0	0	0	0.24	0	0.24	0.24	0.24	0.24	2	2	0	0	0	0	0	0	0	2	0	2	2	2
59	Alpha-1-antitrypsin OS=Homo sapiens GN=SERPINA1 PE=1 SV=3	A1AT_HUMAN	47	5.31	Homo sapiens	0	0	0	0	0	0	0	0	0	2	0	3	5	6	4	0	0	0	0	0	0	0	0	0	0.067	0	0.11	0.18	0.19	0.15	0	0	0	0	0	0	0	0	0	2	0	3	5	5
60	Histidine-rich glycoprotein OS=Homo sapiens GN=HRG PE=1 SV=1	HRG_HUMAN	60	7.52	Homo sapiens	2	3	2	3	2	0	0	0	0	0	0	0	6	7	4	0.053	0.07	0.05	0.076	0.05	0	0	0	0	0	0	0	0.14	0.14	0.11	2	3	2	3	2	0	0	0	0	0	0	0	5	6
61	Ig heavy chain V-III region TUR OS=Homo sapiens PE=1 SV=1	HV318_HUMAN	12	10.12	Homo sapiens	0	0	0	0	0	0	0	0	0	7	5	6	5	5	0	0	0	0	0	0	0	0	0	0	0.27	0.27	0.27	0.27	0.27	0	0	0	0	0	0	0	0	0	0	2	2	2	2	2
62	Protein AMBP OS=Homo sapiens GN=AMBP PE=1 SV=1	AMBP_HUMAN	39	6.15	Homo sapiens	0	0	0	0	0	0	0	0	0	0	0	0	0	0	0	0	0	0	0	0	0	0	0	0	0	0	0	0	0	0	0	0	0	0	0	0	0	0	0	0	0	0	0	0
63	Cartilage oligomeric matrix protein OS=Homo sapiens GN=COMP PE=1 SV=2	COMP_HUMAN	83	4.16	Homo sapiens	0	0	0	0	0	0	0	0	0	0	0	0	0	0	0	0	0	0	0	0	0	0	0	0	0	0	0	0	0	0	0	0	0	0	0	0	0	0	0	0	0	0	0	0
64	Complement C1s subcomponent OS=Homo sapiens GN=C1S PE=1 SV=1	C1S_HUMAN	77	4.59	Homo sapiens	0	0	0	0	0	0	0	0	0	0	0	0	0	0	0	0	0	0	0	0	0	0	0	0	0	0	0	0	0	0	0	0	0	0	0	0	0	0	0	0	0	0	0	0
65	Coagulation factor IX OS=Homo sapiens GN=F9 PE=1 SV=2	FA9_HUMAN	52	5.16	Homo sapiens	0	0	0	0	0	0	0	0	0	0	0	0	0	0	0	0	0	0	0	0	0	0	0	0	0	0	0	0	0	0	0	0	0	0	0	0	0	0	0	0	0	0	0	0
66	Apolipoprotein A-IV OS=Homo sapiens GN=APOA4 PE=1 SV=3	APOA4_HUMAN	45	5.05	Homo sapiens	0	0	0	0	0	0	0	0	0	0	0	0	0	0	0	0	0	0	0	0	0	0	0	0	0	0	0	0	0	0	0	0	0	0	0	0	0	0	0	0	0	0	0	0
67	Platelet factor 4 OS=Homo sapiens GN=PF4 PE=1 SV=2	PLF4_HUMAN	11	8.78	Homo sapiens	0	2	3	0	0	0	0	3	0	5	6	4	3	4	3	0	0.2	0.28	0	0	0	0	0.17	0	0.22	0.29	0.21	0.24	0.32	0.17	0	2	3	0	0	0	0	2	0	4	4	3	2	3
68	Myosin-9 OS=Homo sapiens GN=MYH9 PE=1 SV=4	MYH9_HUMAN	227	5.29	Homo sapiens	0	0	0	0	0	0	0	0	0	0	0	0	2	0	0	0	0	0	0	0	0	0	0	0	0	0	0	0.0082	0	0	0	0	0	0	0	0	0	0	0	0	0	0	2	0
69	Ficolin-3 OS=Homo sapiens GN=FCN3 PE=1 SV=2	FCN3_HUMAN	33	6.66	unknown	0	0	0	2	2	0	0	0	0	2	2	3	3	3	2	0	0	0	0.064	0.064	0	0	0	0	0.064	0.064	0.094	0.13	0.094	0.064	0	0	0	2	2	0	0	0	0	2	2	3	3	3
70	Platelet glycoprotein 4 OS=Homo sapiens GN=CD36 PE=1 SV=2	CD36_HUMAN	53	8.06	Homo sapiens	2	0	3	0	0	0	2	2	2	6	5	6	9	11	11	0.064	0	0.078	0	0	0	0.04	0.04	0.04	0.16	0.13	0.15	0.21	0.24	0.15	2	0	3	0	0	0	2	2	2	6	5	6	7	8
71	C4b-binding protein beta chain OS=Homo sapiens GN=C4BPB PE=1 SV=1	C4BPB_HUMAN	28	4.8	Homo sapiens	0	0	0	0	2	2	0	0	0	0	0	0	0	0	0	0	0	0	0	0.095	0.083	0	0	0	0	0	0	0	0	0	0	0	0	0	2	2	0	0	0	0	0	0	0	0
72	Properdin OS=Homo sapiens GN=CFP PE=1 SV=2	PROP_HUMAN	51	7.92	Homo sapiens	0	2	0	3	3	2	0	0	0	6	9	7	3	4	6	0	0.051	0	0.09	0.09	0.064	0	0	0	0.17	0.22	0.19	0.09	0.09	0.18	0	2	0	3	3	2	0	0	0	5	7	6	3	3
73	Kininogen-1 OS=Homo sapiens GN=KNG1 PE=1 SV=2	KNG1_HUMAN	72	6.8	Homo sapiens	0	0	0	0	0	0	0	0	0	0	0	0	0	0	0	0	0	0	0	0	0	0	0	0	0	0	0	0	0	0	0	0	0	0	0	0	0	0	0	0	0	0	0	0
74	Ig heavy chain V-III region GAL OS=Homo sapiens PE=1 SV=1	HV320_HUMAN	13	8.7	Homo sapiens	3	2	3	2	3	2	2	2	2	6	6	6	3	4	3	0.27	0.17	0.27	0.17	0.27	0.17	0.17	0.17	0.17	0.27	0.27	0.41	0.17	0.27	0.27	3	2	3	2	3	2	2	2	2	3	3	4	2	3
75	Erythrocyte band 7 integral membrane protein OS=Homo sapiens GN=STOM PE=1 SV=3	STOM_HUMAN	32	8.07	Homo sapiens	3	2	2	2	2	2	3	2	0	7	6	9	8	7	9	0.1	0.076	0.066	0.066	0.066	0.066	0.11	0.09	0	0.22	0.25	0.38	0.34	0.3	0.43	3	2	2	2	2	2	3	2	0	6	6	8	7	7
76	Ig kappa chain V-I region EU OS=Homo sapiens PE=1 SV=1	KV106_HUMAN	12	8.46	unknown	2	2	2	4	4	4	2	2	2	0	7	5	6	7	8	0.27	0.27	0.27	0.27	0.27	0.27	0.27	0.27	0.27	0	0.27	0.27	0.27	0.27	0.27	2	2	2	2	2	2	2	2	2	0	2	2	2	2
77	Ig heavy chain V-III region 23 OS=Homo sapiens GN=IGHV3-23 PE=1 SV=2	HV303_HUMAN	13	8.46	Homo sapiens	0	4	5	6	3	6	3	4	2	11	9	8	8	6	5	0	0.35	0.35	0.35	0.35	0.35	0.26	0.26	0.26	0.35	0.35	0.35	0.35	0.35	0.35	0	2	2	2	2	2	3	2	2	2	2	2	2	2
78	Tropomyosin alpha-4 chain OS=Homo sapiens GN=TPM4 PE=1 SV=3	TPM4_HUMAN	29	4.36	Homo sapiens	0	0	0	0	0	0	0	0	0	0	0	0	0	0	0	0	0	0	0	0	0	0	0	0	0	0	0	0	0	0	0	0	0	0	0	0	0	0	0	0	0	0	0	0
79	Complement component C9 OS=Homo sapiens GN=C9 PE=1 SV=2	CO9_HUMAN	63	5.27	Homo sapiens	0	0	0	0	0	0	0	0	0	0	0	0	0	0	0	0	0	0	0	0	0	0	0	0	0	0	0	0	0	0	0	0	0	0	0	0	0	0	0	0	0	0	0	0
80	Keratin, type I cytoskeletal 17 OS=Homo sapiens GN=KRT17 PE=1 SV=2	K1C17_HUMAN	48	4.67	Homo sapiens	9	10	8	11	9	9	8	11	9	13	11	12	14	13	13	0.19	0.24	0.2	0.24	0.19	0.19	0.17	0.23	0.2	0.28	0.28	0.25	0.26	0.26	0.28	2	3	3	3	2	2	3	3	2	6	5	4	4	5
81	Complement C1q subcomponent subunit B OS=Homo sapiens GN=C1QB PE=1 SV=3	C1QB_HUMAN	27	8.87	Homo sapiens	2	3	3	5	3	3	0	3	0	6	7	4	4	4	5	0.091	0.15	0.15	0.17	0.17	0.17	0	0.11	0	0.21	0.21	0.21	0.15	0.15	0.21	2	3	3	3	3	3	0	2	0	4	4	4	3	3
82	Apolipoprotein M OS=Homo sapiens GN=APOM PE=1 SV=2	APOM_HUMAN	21	5.92	Homo sapiens	0	2	0	0	0	0	0	0	0	0	0	0	0	0	3	0	0.069	0	0	0	0	0	0	0	0	0	0	0	0	0.14	0	2	0	0	0	0	0	0	0	0	0	0	0	0
83	Heparin cofactor 2 OS=Homo sapiens GN=SERPIND1 PE=1 SV=3	HEP2_HUMAN	57	6.89	Homo sapiens	0	0	0	0	0	0	0	0	0	0	0	0	0	0	0	0	0	0	0	0	0	0	0	0	0	0	0	0	0	0	0	0	0	0	0	0	0	0	0	0	0	0	0	0
84	Haptoglobin-related protein OS=Homo sapiens GN=HPR PE=2 SV=2	HPTR_HUMAN	39	7.11	Homo sapiens	7	7	7	5	4	4	0	0	0	10	10	8	10	8	14	0.27	0.26	0.26	0.22	0.19	0.19	0	0	0	0.37	0.35	0.28	0.22	0.23	0.39	2	2	2	2	2	2	0	0	0	5	4	4	2	2
85	Integrin alpha-IIb OS=Homo sapiens GN=ITGA2B PE=1 SV=3	ITA2B_HUMAN	113	5.03	Homo sapiens	0	0	0	0	0	0	0	0	0	5	6	4	9	12	10	0	0	0	0	0	0	0	0	0	0.039	0.041	0.021	0.068	0.08	0.072	0	0	0	0	0	0	0	0	0	4	4	2	7	9
86	Integrin beta-1 OS=Homo sapiens GN=ITGB1 PE=1 SV=2	ITB1_HUMAN	88	5.04	Homo sapiens	3	2	0	0	0	0	3	2	2	2	2	2	10	11	7	0.04	0.026	0	0	0	0	0.04	0.03	0.03	0.038	0.024	0.038	0.11	0.11	0.11	3	2	0	0	0	0	3	2	2	2	2	2	8	8
87	Desmoplakin OS=Homo sapiens GN=DSP PE=1 SV=3	DESP_HUMAN	332	6.78	Homo sapiens	2	0	0	0	0	0	3	0	2	4	6	5	3	2	3	0.0073	0	0	0	0	0	0.01	0	0.0073	0.015	0.02	0.018	0.011	0.0073	0.01	2	0	0	0	0	0	3	0	2	4	6	5	3	2
88	Apolipoprotein C-II OS=Homo sapiens GN=APOC2 PE=1 SV=1	APOC2_HUMAN	11	4.36	Homo sapiens	2	3	0	0	0	0	2	2	2	0	0	0	3	4	2	0.2	0.29	0	0	0	0	0.2	0.2	0.2	0	0	0	0.41	0.48	0.2	2	3	0	0	0	0	2	2	2	0	0	0	3	4
89	Ig kappa chain V-II region RPMI 6410 OS=Homo sapiens PE=4 SV=1	KV206_HUMAN	15	9.53	Homo sapiens	0	0	0	4	0	0	2	3	0	3	4	4	0	3	0	0	0	0	0.35	0	0	0.18	0.18	0	0.29	0.38	0.38	0	0.29	0	0	0	0	3	0	0	2	2	0	2	3	3	0	2
90	HLA class I histocompatibility antigen, B-7 alpha chain OS=Homo sapiens GN=HLA-B PE=1 SV=3	1B07_HUMAN	40	5.65	unknown	2	2	3	0	3	2	2	2	2	3	0	2	10	11	10	0.094	0.069	0.097	0	0.12	0.091	0.064	0.064	0.064	0.13	0	0.075	0.33	0.33	0.33	2	2	3	0	3	2	2	2	2	3	0	2	10	9
91	Coagulation factor X OS=Homo sapiens GN=F10 PE=1 SV=2	FA10_HUMAN	55	5.74	Homo sapiens	0	0	0	0	0	0	0	0	0	0	0	0	0	0	0	0	0	0	0	0	0	0	0	0	0	0	0	0	0	0	0	0	0	0	0	0	0	0	0	0	0	0	0	0
92	C-reactive protein OS=Homo sapiens GN=CRP PE=1 SV=1	CRP_HUMAN	25	5.32	Homo sapiens	0	0	0	0	0	0	0	0	0	0	0	0	0	0	0	0	0	0	0	0	0	0	0	0	0	0	0	0	0	0	0	0	0	0	0	0	0	0	0	0	0	0	0	0
93	Alpha-1-antichymotrypsin OS=Homo sapiens GN=SERPINA3 PE=1 SV=2	AACT_HUMAN	48	5.19	Homo sapiens	0	0	0	0	0	0	0	0	0	0	0	0	0	0	0	0	0	0	0	0	0	0	0	0	0	0	0	0	0	0	0	0	0	0	0	0	0	0	0	0	0	0	0	0
94	Ig kappa chain V-IV region (Fragment) OS=Homo sapiens GN=IGKV4-1 PE=4 SV=1	KV401_HUMAN	13	4.85	Homo sapiens	3	2	3	3	3	3	0	0	0	3	3	2	2	3	4	0.32	0.17	0.32	0.32	0.32	0.32	0	0	0	0.17	0.3	0.17	0.17	0.3	0.3	3	2	3	3	3	3	0	0	0	2	3	2	2	3
95	Dermcidin OS=Homo sapiens GN=DCD PE=1 SV=2	DCD_HUMAN	11	6.52	Homo sapiens	4	4	4	3	3	4	2	3	3	2	5	3	2	2	2	0.35	0.35	0.35	0.35	0.35	0.35	0.2	0.23	0.33	0.2	0.23	0.23	0.23	0.23	0.23	4	4	4	3	3	4	2	3	3	2	3	3	2	2
96	Complement C1r subcomponent OS=Homo sapiens GN=C1R PE=1 SV=2	C1R_HUMAN	80	6.14	Homo sapiens	0	0	0	0	0	0	0	0	0	0	0	0	2	5	3	0	0	0	0	0	0	0	0	0	0	0	0	0.041	0.054	0.064	0	0	0	0	0	0	0	0	0	0	0	0	2	3
97	Vitamin K-dependent protein C OS=Homo sapiens GN=PROC PE=1 SV=1	PROC_HUMAN	52	6.23	Homo sapiens	0	0	0	0	0	0	0	0	0	0	0	0	0	0	0	0	0	0	0	0	0	0	0	0	0	0	0	0	0	0	0	0	0	0	0	0	0	0	0	0	0	0	0	0
98	Ig heavy chain V-II region ARH-77 OS=Homo sapiens PE=4 SV=1	HV209_HUMAN	16	8.45	Homo sapiens	2	2	2	2	2	2	0	0	0	4	3	3	5	0	3	0.17	0.17	0.17	0.17	0.17	0.17	0	0	0	0.17	0.17	0.17	0.17	0	0.17	2	2	2	2	2	2	0	0	0	2	2	2	2	0
99	Complement C1q subcomponent subunit A OS=Homo sapiens GN=C1QA PE=1 SV=2	C1QA_HUMAN	26	9.45	Homo sapiens	2	2	2	3	3	4	3	3	2	0	2	2	3	3	2	0.045	0.045	0.045	0.14	0.14	0.14	0.045	0.045	0.045	0	0.045	0.045	0.14	0.14	0.14	2	2	2	3	3	3	2	2	2	0	2	2	3	3
100	Ig heavy chain V-I region HG3 OS=Homo sapiens PE=3 SV=1	HV102_HUMAN	13	9.4	Homo sapiens	3	3	3	0	0	0	0	0	0	3	4	5	0	0	0	0.22	0.22	0.22	0	0	0	0	0	0	0.22	0.22	0.22	0	0	0	2	2	2	0	0	0	0	0	0	2	2	2	0	0
101	Ig alpha-2 chain C region OS=Homo sapiens GN=IGHA2 PE=1 SV=3	IGHA2_HUMAN	37	6.02	Homo sapiens	0	0	0	0	0	0	0	4	0	7	9	9	0	0	0	0	0	0	0	0	0	0	0.17	0	0.17	0.29	0.35	0	0	0	0	0	0	0	0	0	0	2	0	2	2	3	0	0
102	Thrombospondin-4 OS=Homo sapiens GN=THBS4 PE=1 SV=2	TSP4_HUMAN	106	4.23	Homo sapiens	0	0	0	0	0	0	0	0	0	0	0	0	0	0	0	0	0	0	0	0	0	0	0	0	0	0	0	0	0	0	0	0	0	0	0	0	0	0	0	0	0	0	0	0
103	Protein Z-dependent protease inhibitor OS=Homo sapiens GN=SERPINA10 PE=1 SV=1	ZPI_HUMAN	51	8.58	Homo sapiens	0	0	0	0	0	0	0	0	0	0	0	0	0	0	0	0	0	0	0	0	0	0	0	0	0	0	0	0	0	0	0	0	0	0	0	0	0	0	0	0	0	0	0	0
104	Complement factor H-related protein 1 OS=Homo sapiens GN=CFHR1 PE=1 SV=2	FHR1_HUMAN	38	7.42	Homo sapiens	2	3	3	4	4	3	0	0	0	0	0	0	4	0	4	0.07	0.1	0.1	0.14	0.14	0.1	0	0	0	0	0	0	0.13	0	0.14	2	2	2	3	3	2	0	0	0	0	0	0	2	0
105	Ig kappa chain V-III region VG (Fragment) OS=Homo sapiens PE=1 SV=1	KV309_HUMAN	13	4.59	Homo sapiens	0	0	0	0	0	0	0	0	0	0	3	0	0	0	0	0	0	0	0	0	0	0	0	0	0	0.23	0	0	0	0	0	0	0	0	0	0	0	0	0	0	2	0	0	0
106	Transthyretin OS=Homo sapiens GN=TTR PE=1 SV=1	TTHY_HUMAN	16	5.58	Homo sapiens	0	0	0	0	0	0	0	0	0	0	0	0	0	0	0	0	0	0	0	0	0	0	0	0	0	0	0	0	0	0	0	0	0	0	0	0	0	0	0	0	0	0	0	0
107	Complement component C8 alpha chain OS=Homo sapiens GN=C8A PE=1 SV=2	CO8A_HUMAN	65	6.41	Homo sapiens	0	0	0	0	0	0	0	0	0	0	0	0	2	0	2	0	0	0	0	0	0	0	0	0	0	0	0	0.058	0	0.058	0	0	0	0	0	0	0	0	0	0	0	0	2	0
108	Vitamin D-binding protein OS=Homo sapiens GN=GC PE=1 SV=1	VTDB_HUMAN	53	5.21	Homo sapiens	0	0	0	0	0	0	0	0	0	0	0	0	4	5	5	0	0	0	0	0	0	0	0	0	0	0	0	0.13	0.13	0.1	0	0	0	0	0	0	0	0	0	0	0	0	3	3
109	Serum amyloid P-component OS=Homo sapiens GN=APCS PE=1 SV=2	SAMP_HUMAN	25	6.52	Homo sapiens	0	0	0	3	2	0	2	3	0	0	0	0	0	0	0	0	0	0	0.1	0.1	0	0.094	0.14	0	0	0	0	0	0	0	0	0	0	2	2	0	2	3	0	0	0	0	0	0
110	Platelet glycoprotein IX OS=Homo sapiens GN=GP9 PE=1 SV=3	GPIX_HUMAN	19	6.32	Homo sapiens	3	3	3	3	2	3	2	2	2	5	5	3	5	6	6	0.19	0.19	0.19	0.19	0.12	0.19	0.12	0.12	0.12	0.32	0.32	0.19	0.24	0.32	0.32	3	3	3	3	2	3	2	2	2	5	5	3	4	5
111	Ig kappa chain V-III region CLL OS=Homo sapiens PE=4 SV=2	KV308_HUMAN	14	8.7	unknown	0	0	2	2	2	0	0	0	0	2	3	3	6	3	3	0	0	0.19	0.19	0.19	0	0	0	0	0.19	0.19	0.19	0.33	0.19	0.19	0	0	2	2	2	0	0	0	0	2	2	2	3	2
112	Ig heavy chain V-III region WEA OS=Homo sapiens PE=1 SV=1	HV302_HUMAN	12	8.7	Homo sapiens	0	0	0	0	0	0	0	0	0	5	0	0	0	0	0	0	0	0	0	0	0	0	0	0	0.36	0	0	0	0	0	0	0	0	0	0	0	0	0	0	2	0	0	0	0
113	Ig lambda chain V-III region LOI OS=Homo sapiens PE=1 SV=1	LV302_HUMAN	12	4.72	Homo sapiens	0	0	0	2	3	3	0	0	0	2	3	0	3	0	3	0	0	0	0.31	0.38	0.38	0	0	0	0.22	0.22	0	0.3	0	0.22	0	0	0	2	3	3	0	0	0	2	2	0	3	0
114	Phosphatidylcholine-sterol acyltransferase OS=Homo sapiens GN=LCAT PE=1 SV=1	LCAT_HUMAN	50	6.04	Homo sapiens	0	0	0	0	0	0	0	0	0	0	0	0	0	0	0	0	0	0	0	0	0	0	0	0	0	0	0	0	0	0	0	0	0	0	0	0	0	0	0	0	0	0	0	0
115	Ig heavy chain V-I region V35 OS=Homo sapiens PE=1 SV=1	HV103_HUMAN	13	9.87	Homo sapiens	0	0	0	0	0	0	0	0	0	4	4	5	0	0	0	0	0	0	0	0	0	0	0	0	0.21	0.21	0.21	0	0	0	0	0	0	0	0	0	0	0	0	2	2	2	0	0
116	Ficolin-2 OS=Homo sapiens GN=FCN2 PE=1 SV=2	FCN2_HUMAN	34	6.77	unknown	2	0	0	0	0	0	0	0	0	0	3	2	2	2	4	0.077	0	0	0	0	0	0	0	0	0	0.11	0.073	0.077	0.061	0.11	2	0	0	0	0	0	0	0	0	0	3	2	2	2
117	Hemoglobin subunit beta OS=Homo sapiens GN=HBB PE=1 SV=2	HBB_HUMAN	16	7.32	Homo sapiens	0	0	0	0	0	0	0	0	0	3	4	3	3	4	3	0	0	0	0	0	0	0	0	0	0.28	0.25	0.25	0.29	0.29	0.21	0	0	0	0	0	0	0	0	0	3	3	3	3	3
118	Ig heavy chain V-III region CAM OS=Homo sapiens PE=1 SV=1	HV307_HUMAN	14	6.5	unknown	0	0	0	0	0	0	0	0	0	0	0	0	0	0	0	0	0	0	0	0	0	0	0	0	0	0	0	0	0	0	0	0	0	0	0	0	0	0	0	0	0	0	0	0
119	Ig gamma-4 chain C region OS=Homo sapiens GN=IGHG4 PE=1 SV=1	IGHG4_HUMAN	36	7.41	Homo sapiens	0	0	0	0	0	0	0	0	0	32	0	28	0	0	0	0	0	0	0	0	0	0	0	0	0.43	0	0.46	0	0	0	0	0	0	0	0	0	0	0	0	2	0	2	0	0
120	Heat shock 70 kDa protein 1-like OS=Homo sapiens GN=HSPA1L PE=1 SV=2	HS71L_HUMAN	70	5.82	unknown	0	0	0	2	0	3	0	0	0	0	0	0	0	0	0	0	0	0	0.019	0	0.044	0	0	0	0	0	0	0	0	0	0	0	0	2	0	3	0	0	0	0	0	0	0	0
121	Lysozyme C OS=Homo sapiens GN=LYZ PE=1 SV=1	LYSC_HUMAN	17	9.35	Homo sapiens	2	3	2	0	2	2	0	0	0	0	2	2	0	0	0	0.14	0.2	0.14	0	0.14	0.14	0	0	0	0	0.14	0.14	0	0	0	2	3	2	0	2	2	0	0	0	0	2	2	0	0
122	Ig lambda chain V-III region SH OS=Homo sapiens PE=1 SV=1	LV301_HUMAN	11	6.5	Homo sapiens	3	0	0	0	2	2	0	0	0	2	0	0	0	0	4	0.32	0	0	0	0.16	0.25	0	0	0	0.24	0	0	0	0	0.34	3	0	0	0	2	2	0	0	0	2	0	0	0	0
123	Apolipoprotein A-II OS=Homo sapiens GN=APOA2 PE=1 SV=1	APOA2_HUMAN	11	6.6	Homo sapiens	2	0	0	0	0	0	0	0	0	0	0	0	2	3	0	0.11	0	0	0	0	0	0	0	0	0	0	0	0.19	0.21	0	2	0	0	0	0	0	0	0	0	0	0	0	2	3
124	Ig lambda chain V-I region WAH OS=Homo sapiens PE=1 SV=1	LV106_HUMAN	12	6.46	unknown	0	0	0	2	2	0	0	0	0	0	2	2	0	0	2	0	0	0	0.22	0.22	0	0	0	0	0	0.22	0.19	0	0	0.22	0	0	0	2	2	0	0	0	0	0	2	2	0	0
125	Ig heavy chain V-III region GA OS=Homo sapiens PE=1 SV=1	HV308_HUMAN	13	10.02	Homo sapiens	0	0	0	0	0	2	0	0	0	0	0	0	2	0	0	0	0	0	0	0	0.25	0	0	0	0	0	0	0.25	0	0	0	0	0	0	0	2	0	0	0	0	0	0	2	0
126	Complement component C8 beta chain OS=Homo sapiens GN=C8B PE=1 SV=3	CO8B_HUMAN	67	8.17	Homo sapiens	0	0	0	0	0	0	0	0	0	0	0	0	0	0	0	0	0	0	0	0	0	0	0	0	0	0	0	0	0	0	0	0	0	0	0	0	0	0	0	0	0	0	0	0
127	Small proline-rich protein 2A OS=Homo sapiens GN=SPRR2A PE=1 SV=1	SPR2A_HUMAN	8	8.49	unknown	4	0	0	0	0	0	3	4	3	2	0	2	0	0	4	0.31	0	0	0	0	0	0.31	0.31	0.31	0.31	0	0.31	0	0	0.31	2	0	0	0	0	0	2	2	2	2	0	2	0	0
128	Secreted phosphoprotein 24 OS=Homo sapiens GN=SPP2 PE=1 SV=1	SPP24_HUMAN	24	8.46	Homo sapiens	0	0	0	0	0	0	0	0	0	0	0	0	0	0	0	0	0	0	0	0	0	0	0	0	0	0	0	0	0	0	0	0	0	0	0	0	0	0	0	0	0	0	0	0
129	Filaggrin-2 OS=Homo sapiens GN=FLG2 PE=1 SV=1	FILA2_HUMAN	248	8.35	Homo sapiens	2	2	2	2	2	2	2	2	0	2	0	0	0	0	3	0.0088	0.0088	0.0088	0.0088	0.0088	0.0088	0.0088	0.0088	0	0.0096	0	0	0	0	0.02	2	2	2	2	2	2	2	2	0	2	0	0	0	0
130	Apolipoprotein C-I OS=Homo sapiens GN=APOC1 PE=1 SV=1	APOC1_HUMAN	9	9.17	Homo sapiens	0	2	0	0	0	0	0	0	0	0	0	0	0	2	4	0	0.27	0	0	0	0	0	0	0	0	0	0	0	0.27	0.37	0	2	0	0	0	0	0	0	0	0	0	0	0	2
131	Ig kappa chain V-III region B6 OS=Homo sapiens PE=1 SV=1	KV301_HUMAN	12	9.53	Homo sapiens	0	0	0	0	0	0	0	0	0	0	0	0	3	0	0	0	0	0	0	0	0	0	0	0	0	0	0	0.31	0	0	0	0	0	0	0	0	0	0	0	0	0	0	2	0
132	Complement component C8 gamma chain OS=Homo sapiens GN=C8G PE=1 SV=3	CO8G_HUMAN	22	8.48	Homo sapiens	0	0	0	0	0	0	0	0	0	0	0	0	0	0	0	0	0	0	0	0	0	0	0	0	0	0	0	0	0	0	0	0	0	0	0	0	0	0	0	0	0	0	0	0
133	Trypsin-1 OS=Homo sapiens GN=PRSS1 PE=1 SV=1	TRY1_HUMAN	27	6.49	unknown	0	3	3	0	0	0	0	0	0	0	0	0	2	2	2	0	0.12	0.12	0	0	0	0	0	0	0	0	0	0.11	0.081	0.12	0	3	3	0	0	0	0	0	0	0	0	0	2	2
134	Sorbin and SH3 domain-containing protein 2 OS=Homo sapiens GN=SORBS2 PE=1 SV=3	SRBS2_HUMAN	124	8.42	unknown	0	0	0	0	0	0	0	0	0	0	0	0	3	0	0	0	0	0	0	0	0	0	0	0	0	0	0	0.016	0	0	0	0	0	0	0	0	0	0	0	0	0	0	2	0
135	Keratin, type II cuticular Hb5 OS=Homo sapiens GN=KRT85 PE=1 SV=1	KRT85_HUMAN	56	6.49	unknown	0	0	0	8	5	8	0	0	0	0	0	0	0	0	0	0	0	0	0.2	0.11	0.19	0	0	0	0	0	0	0	0	0	0	0	0	7	5	8	0	0	0	0	0	0	0	0
136	Galectin-3-binding protein OS=Homo sapiens GN=LGALS3BP PE=1 SV=1	LG3BP_HUMAN	65	4.9	unknown	0	0	0	2	3	0	0	0	0	4	4	5	0	0	0	0	0	0	0.036	0.06	0	0	0	0	0.082	0.082	0.082	0	0	0	0	0	0	2	3	0	0	0	0	4	4	4	0	0
137	Alpha-1-acid glycoprotein 1 OS=Homo sapiens GN=ORM1 PE=1 SV=1	A1AG1_HUMAN	24	4.66	Homo sapiens	2	0	2	0	0	0	0	0	0	0	0	0	0	2	0	0.11	0	0.11	0	0	0	0	0	0	0	0	0	0	0.09	0	2	0	2	0	0	0	0	0	0	0	0	0	0	2
138	Vitamin K-dependent protein Z OS=Homo sapiens GN=PROZ PE=1 SV=2	PROZ_HUMAN	45	5.87	Homo sapiens	0	0	0	0	0	0	0	0	0	0	0	0	0	0	0	0	0	0	0	0	0	0	0	0	0	0	0	0	0	0	0	0	0	0	0	0	0	0	0	0	0	0	0	0
139	Solute carrier family 2, facilitated glucose transporter member 3 OS=Homo sapiens GN=SLC2A3 PE=2 SV=1	GTR3_HUMAN	54	7.24	Homo sapiens	0	0	0	0	0	0	2	2	3	2	2	2	4	5	3	0	0	0	0	0	0	0.036	0.036	0.077	0.036	0.036	0.036	0.058	0.11	0.081	0	0	0	0	0	0	2	2	3	2	2	2	3	5
140	Desmocollin-1 OS=Homo sapiens GN=DSC1 PE=1 SV=2	DSC1_HUMAN	100	5.08	Homo sapiens	2	0	0	0	0	0	2	0	0	2	0	2	2	3	0	0.032	0	0	0	0	0	0.032	0	0	0.032	0	0.032	0.032	0.032	0	2	0	0	0	0	0	2	0	0	2	0	2	2	2
141	ATP synthase subunit beta, mitochondrial OS=Homo sapiens GN=ATP5B PE=1 SV=3	ATPB_HUMAN	57	5.07	Homo sapiens	0	0	0	0	0	0	0	0	0	2	2	0	5	0	3	0	0	0	0	0	0	0	0	0	0.049	0.045	0	0.098	0	0.074	0	0	0	0	0	0	0	0	0	2	2	0	4	0
142	Prenylcysteine oxidase 1 OS=Homo sapiens GN=PCYOX1 PE=1 SV=3	PCYOX_HUMAN	57	6.1	unknown	0	0	0	0	0	0	0	0	0	2	4	0	4	2	0	0	0	0	0	0	0	0	0	0	0.051	0.051	0	0.073	0.04	0	0	0	0	0	0	0	0	0	0	2	2	0	3	2
143	Phosphatidylinositol-glycan-specific phospholipase D OS=Homo sapiens GN=GPLD1 PE=1 SV=3	PHLD_HUMAN	92	6.33	unknown	0	0	0	0	0	0	0	0	0	0	0	0	0	0	0	0	0	0	0	0	0	0	0	0	0	0	0	0	0	0	0	0	0	0	0	0	0	0	0	0	0	0	0	0
144	Keratin, type II cytoskeletal 6C OS=Homo sapiens GN=KRT6C PE=1 SV=3	K2C6C_HUMAN	60	8.16	Homo sapiens	0	0	0	0	0	0	23	15	21	0	22	23	33	32	29	0	0	0	0	0	0	0.35	0.25	0.29	0	0.37	0.39	0.47	0.46	0.43	0	0	0	0	0	0	2	2	2	0	2	2	2	2
145	Ig heavy chain V-III region BUT OS=Homo sapiens PE=1 SV=1	HV306_HUMAN	12	9.48	Homo sapiens	0	0	0	0	0	0	0	0	0	0	0	0	5	4	3	0	0	0	0	0	0	0	0	0	0	0	0	0.36	0.36	0.36	0	0	0	0	0	0	0	0	0	0	0	0	2	2
146	Hemopexin OS=Homo sapiens GN=HPX PE=1 SV=2	HEMO_HUMAN	52	7.02	Homo sapiens	0	0	0	0	0	0	0	0	0	0	0	0	0	0	0	0	0	0	0	0	0	0	0	0	0	0	0	0	0	0	0	0	0	0	0	0	0	0	0	0	0	0	0	0
147	Neutrophil defensin 1 OS=Homo sapiens GN=DEFA1 PE=1 SV=1	DEF1_HUMAN	10	7.04	Homo sapiens	0	0	0	0	0	0	0	0	0	0	2	0	2	0	2	0	0	0	0	0	0	0	0	0	0	0.19	0	0.19	0	0.19	0	0	0	0	0	0	0	0	0	0	2	0	2	0
148	Lipocalin-1 OS=Homo sapiens GN=LCN1 PE=1 SV=1	LCN1_HUMAN	19	5.3	unknown	3	4	2	0	0	0	0	0	0	0	2	2	0	0	0	0.2	0.24	0.13	0	0	0	0	0	0	0	0.13	0.13	0	0	0	3	4	2	0	0	0	0	0	0	0	2	2	0	0
149	Alpha-2-HS-glycoprotein OS=Homo sapiens GN=AHSG PE=1 SV=1	FETUA_HUMAN	39	5.52	Homo sapiens	0	0	0	0	0	0	0	0	0	0	0	0	0	0	0	0	0	0	0	0	0	0	0	0	0	0	0	0	0	0	0	0	0	0	0	0	0	0	0	0	0	0	0	0
150	Mannan-binding lectin serine protease 1 OS=Homo sapiens GN=MASP1 PE=1 SV=3	MASP1_HUMAN	79	5.18	Homo sapiens	0	0	0	0	0	0	0	0	0	0	0	0	0	0	0	0	0	0	0	0	0	0	0	0	0	0	0	0	0	0	0	0	0	0	0	0	0	0	0	0	0	0	0	0
151	Ig kappa chain V-III region NG9 (Fragment) OS=Homo sapiens PE=2 SV=1	KV303_HUMAN	11	9.53	unknown	0	0	0	0	0	0	0	0	0	5	0	0	0	0	4	0	0	0	0	0	0	0	0	0	0.65	0	0	0	0	0.65	0	0	0	0	0	0	0	0	0	2	0	0	0	0
152	Hemoglobin subunit alpha OS=Homo sapiens GN=HBA1 PE=1 SV=2	HBA_HUMAN	15	9.09	Homo sapiens	0	0	0	0	0	0	0	0	0	0	0	3	0	4	2	0	0	0	0	0	0	0	0	0	0	0	0.17	0	0.17	0.17	0	0	0	0	0	0	0	0	0	0	0	2	0	2
153	14-3-3 protein zeta/delta OS=Homo sapiens GN=YWHAZ PE=1 SV=1	1433Z_HUMAN	28	4.43	Homo sapiens	0	0	0	0	0	0	0	0	0	0	0	0	0	0	0	0	0	0	0	0	0	0	0	0	0	0	0	0	0	0	0	0	0	0	0	0	0	0	0	0	0	0	0	0
154	Glyceraldehyde-3-phosphate dehydrogenase OS=Homo sapiens GN=GAPDH PE=1 SV=3	G3P_HUMAN	36	8.73	Homo sapiens	0	0	0	0	0	0	0	0	0	2	2	0	2	0	0	0	0	0	0	0	0	0	0	0	0.066	0.066	0	0.066	0	0	0	0	0	0	0	0	0	0	0	2	2	0	2	0
155	Beta-Ala-His dipeptidase OS=Homo sapiens GN=CNDP1 PE=1 SV=4	CNDP1_HUMAN	57	4.95	unknown	0	0	0	0	0	0	0	0	0	0	0	0	0	0	0	0	0	0	0	0	0	0	0	0	0	0	0	0	0	0	0	0	0	0	0	0	0	0	0	0	0	0	0	0
156	CD9 antigen OS=Homo sapiens GN=CD9 PE=1 SV=4	CD9_HUMAN	25	7.19	Homo sapiens	0	0	0	0	0	0	0	0	0	0	2	2	2	2	0	0	0	0	0	0	0	0	0	0	0	0.096	0.096	0.096	0.096	0	0	0	0	0	0	0	0	0	0	0	2	2	2	2
157	Calmodulin-like protein 5 OS=Homo sapiens GN=CALML5 PE=1 SV=2	CALL5_HUMAN	16	4.05	Homo sapiens	3	3	3	0	0	0	0	0	0	0	0	0	0	0	0	0.25	0.25	0.25	0	0	0	0	0	0	0	0	0	0	0	0	3	3	3	0	0	0	0	0	0	0	0	0	0	0
158	Complement C4-B OS=Homo sapiens GN=C4B PE=1 SV=2	CO4B_HUMAN	193	7.28	Homo sapiens	0	0	0	0	0	0	0	0	0	0	0	0	0	0	0	0	0	0	0	0	0	0	0	0	0	0	0	0	0	0	0	0	0	0	0	0	0	0	0	0	0	0	0	0
159	Tubulin beta-1 chain OS=Homo sapiens GN=TUBB1 PE=1 SV=1	TBB1_HUMAN	50	4.82	Homo sapiens	0	0	0	0	0	0	0	0	0	0	0	0	0	0	0	0	0	0	0	0	0	0	0	0	0	0	0	0	0	0	0	0	0	0	0	0	0	0	0	0	0	0	0	0
160	Ig kappa chain V-I region DEE OS=Homo sapiens PE=1 SV=1	KV105_HUMAN	12	8.46	Homo sapiens	0	0	0	0	0	0	0	0	0	0	0	0	0	2	0	0	0	0	0	0	0	0	0	0	0	0	0	0	0.32	0	0	0	0	0	0	0	0	0	0	0	0	0	0	2
161	Junction plakoglobin OS=Homo sapiens GN=JUP PE=1 SV=3	PLAK_HUMAN	82	6.05	Homo sapiens	0	0	0	0	0	0	2	0	0	0	2	2	3	2	0	0	0	0	0	0	0	0.027	0	0	0	0.032	0.032	0.042	0.032	0	0	0	0	0	0	0	2	0	0	0	2	2	3	2
162	Talin-1 OS=Homo sapiens GN=TLN1 PE=1 SV=3	TLN1_HUMAN	270	5.94	Homo sapiens	0	0	0	0	0	0	0	0	0	0	0	0	0	0	2	0	0	0	0	0	0	0	0	0	0	0	0	0	0	0.011	0	0	0	0	0	0	0	0	0	0	0	0	0	0
163	Elongation factor 1-alpha 2 OS=Homo sapiens GN=EEF1A2 PE=1 SV=1	EF1A2_HUMAN	50	9.5	unknown	0	0	0	0	0	0	0	0	0	0	0	0	0	0	0	0	0	0	0	0	0	0	0	0	0	0	0	0	0	0	0	0	0	0	0	0	0	0	0	0	0	0	0	0
164	Tubulin alpha-4A chain OS=Homo sapiens GN=TUBA4A PE=1 SV=1	TBA4A_HUMAN	50	4.69	Homo sapiens	0	0	0	0	0	0	0	0	0	0	0	0	0	0	0	0	0	0	0	0	0	0	0	0	0	0	0	0	0	0	0	0	0	0	0	0	0	0	0	0	0	0	0	0
165	Lumican OS=Homo sapiens GN=LUM PE=1 SV=2	LUM_HUMAN	38	6.6	Homo sapiens	0	0	0	0	0	0	0	0	0	0	0	0	0	0	0	0	0	0	0	0	0	0	0	0	0	0	0	0	0	0	0	0	0	0	0	0	0	0	0	0	0	0	0	0
166	von Willebrand factor OS=Homo sapiens GN=VWF PE=1 SV=4	VWF_HUMAN	309	5.15	Homo sapiens	0	2	0	0	0	0	0	0	0	0	0	0	4	4	5	0	0.0085	0	0	0	0	0	0	0	0	0	0	0.017	0.017	0.02	0	2	0	0	0	0	0	0	0	0	0	0	4	4
167	Platelet glycoprotein Ib beta chain OS=Homo sapiens GN=GP1BB PE=1 SV=1	GP1BB_HUMAN	22	9.37	Homo sapiens	0	0	0	0	0	0	0	0	2	0	0	0	0	2	2	0	0	0	0	0	0	0	0	0.1	0	0	0	0	0.1	0.1	0	0	0	0	0	0	0	0	2	0	0	0	0	2
168	HLA class I histocompatibility antigen, A-11 alpha chain OS=Homo sapiens GN=HLA-A PE=1 SV=1	1A11_HUMAN	41	6.06	unknown	0	0	0	0	0	0	0	0	0	0	0	0	7	8	10	0	0	0	0	0	0	0	0	0	0	0	0	0.27	0.3	0.3	0	0	0	0	0	0	0	0	0	0	0	0	4	4
169	Mannan-binding lectin serine protease 2 OS=Homo sapiens GN=MASP2 PE=1 SV=4	MASP2_HUMAN	76	5.37	Homo sapiens	0	0	0	0	0	0	0	0	0	0	0	0	0	0	0	0	0	0	0	0	0	0	0	0	0	0	0	0	0	0	0	0	0	0	0	0	0	0	0	0	0	0	0	0
170	Amyloid beta A4 protein OS=Homo sapiens GN=APP PE=1 SV=3	A4_HUMAN	87	4.45	Homo sapiens	0	0	0	0	0	0	0	0	0	0	0	0	0	0	0	0	0	0	0	0	0	0	0	0	0	0	0	0	0	0	0	0	0	0	0	0	0	0	0	0	0	0	0	0
171	Voltage-dependent anion-selective channel protein 3 OS=Homo sapiens GN=VDAC3 PE=1 SV=1	VDAC3_HUMAN	31	8.9	Homo sapiens	0	0	0	0	0	0	0	0	0	0	0	0	4	2	2	0	0	0	0	0	0	0	0	0	0	0	0	0.18	0.074	0.074	0	0	0	0	0	0	0	0	0	0	0	0	4	2
172	Keratin, type II cuticular Hb6 OS=Homo sapiens GN=KRT86 PE=1 SV=1	KRT86_HUMAN	53	5.35	unknown	0	0	0	0	5	7	0	0	0	0	0	0	0	0	0	0	0	0	0	0.12	0.16	0	0	0	0	0	0	0	0	0	0	0	0	0	2	2	0	0	0	0	0	0	0	0
173	Resistin OS=Homo sapiens GN=RETN PE=2 SV=1	RETN_HUMAN	11	6.89	Homo sapiens	2	0	2	0	0	0	0	0	0	0	0	0	0	0	0	0.25	0	0.25	0	0	0	0	0	0	0	0	0	0	0	0	2	0	2	0	0	0	0	0	0	0	0	0	0	0
174	Band 3 anion transport protein OS=Homo sapiens GN=SLC4A1 PE=1 SV=3	B3AT_HUMAN	102	4.84	Homo sapiens	0	0	0	2	2	0	0	0	0	2	2	2	0	0	0	0	0	0	0.03	0.03	0	0	0	0	0.03	0.03	0.03	0	0	0	0	0	0	2	2	0	0	0	0	2	2	2	0	0
175	Filaggrin OS=Homo sapiens GN=FLG PE=1 SV=3	FILA_HUMAN	435	9.6	Homo sapiens	0	3	2	0	0	0	0	0	0	0	0	0	0	2	3	0	0.013	0.0089	0	0	0	0	0	0	0	0	0	0	0.0089	0.013	0	3	2	0	0	0	0	0	0	0	0	0	0	2
176	Alpha-actinin-1 OS=Homo sapiens GN=ACTN1 PE=1 SV=2	ACTN1_HUMAN	103	5.07	Homo sapiens	0	0	0	0	0	0	0	0	0	0	0	0	0	0	0	0	0	0	0	0	0	0	0	0	0	0	0	0	0	0	0	0	0	0	0	0	0	0	0	0	0	0	0	0
177	Keratin, type I cuticular Ha1 OS=Homo sapiens GN=KRT31 PE=1 SV=3	K1H1_HUMAN	47	4.53	unknown	0	0	0	6	5	6	0	0	0	0	0	0	0	0	0	0	0	0	0.15	0.12	0.13	0	0	0	0	0	0	0	0	0	0	0	0	5	4	5	0	0	0	0	0	0	0	0
178	Pleckstrin OS=Homo sapiens GN=PLEK PE=1 SV=3	PLEK_HUMAN	40	8.45	Homo sapiens	0	0	0	0	0	0	0	0	0	0	0	0	3	2	2	0	0	0	0	0	0	0	0	0	0	0	0	0.077	0.077	0.077	0	0	0	0	0	0	0	0	0	0	0	0	2	2
179	Calreticulin OS=Homo sapiens GN=CALR PE=1 SV=1	CALR_HUMAN	48	4.04	Homo sapiens	0	0	0	0	0	0	0	0	0	0	0	0	0	0	0	0	0	0	0	0	0	0	0	0	0	0	0	0	0	0	0	0	0	0	0	0	0	0	0	0	0	0	0	0
180	Integrin alpha-2 OS=Homo sapiens GN=ITGA2 PE=1 SV=1	ITA2_HUMAN	129	4.95	unknown	0	0	0	0	0	0	0	0	0	0	0	0	4	7	4	0	0	0	0	0	0	0	0	0	0	0	0	0.042	0.071	0.043	0	0	0	0	0	0	0	0	0	0	0	0	4	7
181	Serglycin OS=Homo sapiens GN=SRGN PE=1 SV=3	SRGN_HUMAN	18	4.57	Homo sapiens	0	0	0	0	0	0	0	0	0	0	0	0	0	0	0	0	0	0	0	0	0	0	0	0	0	0	0	0	0	0	0	0	0	0	0	0	0	0	0	0	0	0	0	0
182	ATP synthase subunit alpha, mitochondrial OS=Homo sapiens GN=ATP5A1 PE=1 SV=1	ATPA_HUMAN	60	9.56	Homo sapiens	0	0	0	0	0	0	0	0	0	0	0	0	2	0	0	0	0	0	0	0	0	0	0	0	0	0	0	0.042	0	0	0	0	0	0	0	0	0	0	0	0	0	0	2	0
183	Gelsolin OS=Homo sapiens GN=GSN PE=1 SV=1	GELS_HUMAN	86	6.19	Homo sapiens	0	0	0	0	0	0	0	0	0	0	0	0	0	0	0	0	0	0	0	0	0	0	0	0	0	0	0	0	0	0	0	0	0	0	0	0	0	0	0	0	0	0	0	0
184	Alpha-2-antiplasmin OS=Homo sapiens GN=SERPINF2 PE=1 SV=3	A2AP_HUMAN	55	6.24	Homo sapiens	0	0	0	0	0	0	0	0	0	0	0	0	0	0	0	0	0	0	0	0	0	0	0	0	0	0	0	0	0	0	0	0	0	0	0	0	0	0	0	0	0	0	0	0
185	Ig kappa chain V-III region IARC/BL41 OS=Homo sapiens PE=4 SV=1	KV311_HUMAN	14	4.59	unknown	0	0	0	0	0	0	0	0	0	0	0	2	0	0	0	0	0	0	0	0	0	0	0	0	0	0	0.27	0	0	0	0	0	0	0	0	0	0	0	0	0	0	2	0	0
186	Apolipoprotein C-IV OS=Homo sapiens GN=APOC4 PE=1 SV=1	APOC4_HUMAN	15	9.13	Homo sapiens	0	0	0	0	0	0	2	0	0	0	0	0	0	0	0	0	0	0	0	0	0	0.087	0	0	0	0	0	0	0	0	0	0	0	0	0	0	2	0	0	0	0	0	0	0
187	Lipopolysaccharide-binding protein OS=Homo sapiens GN=LBP PE=1 SV=3	LBP_HUMAN	53	6.68	Homo sapiens	0	0	0	0	0	0	0	0	0	0	0	0	0	0	0	0	0	0	0	0	0	0	0	0	0	0	0	0	0	0	0	0	0	0	0	0	0	0	0	0	0	0	0	0
188	Polymeric immunoglobulin receptor OS=Homo sapiens GN=PIGR PE=1 SV=4	PIGR_HUMAN	83	5.43	unknown	0	0	2	0	0	0	0	0	0	2	2	2	0	0	0	0	0	0.047	0	0	0	0	0	0	0.046	0.046	0.046	0	0	0	0	0	2	0	0	0	0	0	0	2	2	2	0	0
189	Serum amyloid A-4 protein OS=Homo sapiens GN=SAA4 PE=1 SV=2	SAA4_HUMAN	15	9.38	Homo sapiens	0	0	0	0	0	0	0	0	0	0	0	0	0	0	0	0	0	0	0	0	0	0	0	0	0	0	0	0	0	0	0	0	0	0	0	0	0	0	0	0	0	0	0	0
190	Serine/threonine-protein kinase N3 OS=Homo sapiens GN=PKN3 PE=1 SV=1	PKN3_HUMAN	99	8.56	unknown	0	0	0	0	0	0	0	0	0	2	0	0	0	0	0	0	0	0	0	0	0	0	0	0	0.027	0	0	0	0	0	0	0	0	0	0	0	0	0	0	2	0	0	0	0
191	Isocitrate dehydrogenase [NADP], mitochondrial OS=Homo sapiens GN=IDH2 PE=1 SV=2	IDHP_HUMAN	51	8.95	Homo sapiens	0	0	0	0	0	0	0	2	0	0	0	0	0	0	0	0	0	0	0	0	0	0	0.051	0	0	0	0	0	0	0	0	0	0	0	0	0	0	2	0	0	0	0	0	0
192	Alpha-1-acid glycoprotein 2 OS=Homo sapiens GN=ORM2 PE=1 SV=2	A1AG2_HUMAN	24	4.76	Homo sapiens	0	0	0	0	0	0	0	0	0	0	0	0	0	0	0	0	0	0	0	0	0	0	0	0	0	0	0	0	0	0	0	0	0	0	0	0	0	0	0	0	0	0	0	0
193	HLA class I histocompatibility antigen, B-56 alpha chain OS=Homo sapiens GN=HLA-B PE=1 SV=1	1B56_HUMAN	40	6.06	unknown	0	0	0	0	0	0	0	0	0	0	3	4	9	9	10	0	0	0	0	0	0	0	0	0	0	0.11	0.14	0.33	0.3	0.3	0	0	0	0	0	0	0	0	0	0	2	2	3	2
194	Leukocyte surface antigen CD47 OS=Homo sapiens GN=CD47 PE=1 SV=1	CD47_HUMAN	35	7.27	Homo sapiens	0	0	0	0	0	0	0	0	0	0	0	0	0	0	0	0	0	0	0	0	0	0	0	0	0	0	0	0	0	0	0	0	0	0	0	0	0	0	0	0	0	0	0	0
195	Protein S100-A7 OS=Homo sapiens GN=S100A7 PE=1 SV=4	S10A7_HUMAN	11	6.78	Homo sapiens	3	2	3	0	0	0	2	0	2	0	0	0	0	0	0	0.22	0.22	0.22	0	0	0	0.22	0	0.22	0	0	0	0	0	0	2	2	2	0	0	0	2	0	2	0	0	0	0	0
196	Adenosylhomocysteinase OS=Homo sapiens GN=AHCY PE=1 SV=4	SAHH_HUMAN	48	6.29	unknown	0	0	0	0	0	0	0	0	0	0	0	0	0	0	0	0	0	0	0	0	0	0	0	0	0	0	0	0	0	0	0	0	0	0	0	0	0	0	0	0	0	0	0	0
197	Tubulin beta chain OS=Homo sapiens GN=TUBB PE=1 SV=2	TBB5_HUMAN	50	4.52	Homo sapiens	0	0	0	0	0	0	0	0	0	0	0	0	0	0	0	0	0	0	0	0	0	0	0	0	0	0	0	0	0	0	0	0	0	0	0	0	0	0	0	0	0	0	0	0
198	Suprabasin OS=Homo sapiens GN=SBSN PE=1 SV=2	SBSN_HUMAN	61	7.01	Homo sapiens	2	2	2	0	0	0	0	0	0	2	0	0	0	0	2	0.061	0.061	0.061	0	0	0	0	0	0	0.061	0	0	0	0	0.061	2	2	2	0	0	0	0	0	0	2	0	0	0	0
199	Protein S100-A8 OS=Homo sapiens GN=S100A8 PE=1 SV=1	S10A8_HUMAN	11	7.07	Homo sapiens	0	2	2	0	0	0	2	0	2	0	0	0	0	0	0	0	0.24	0.24	0	0	0	0.24	0	0.24	0	0	0	0	0	0	0	2	2	0	0	0	2	0	2	0	0	0	0	0
200	Integrin alpha-6 OS=Homo sapiens GN=ITGA6 PE=1 SV=5	ITA6_HUMAN	127	6.57	Homo sapiens	0	0	0	0	0	0	0	0	0	0	0	0	2	2	0	0	0	0	0	0	0	0	0	0	0	0	0	0.019	0.02	0	0	0	0	0	0	0	0	0	0	0	0	0	2	2
201	Keratin, type II cytoskeletal 6B OS=Homo sapiens GN=KRT6B PE=1 SV=5	K2C6B_HUMAN	60	8.16	unknown	0	0	0	0	0	0	0	0	0	0	0	0	0	0	30	0	0	0	0	0	0	0	0	0	0	0	0	0	0	0.43	0	0	0	0	0	0	0	0	0	0	0	0	0	0
202	Heat shock protein HSP 90-alpha OS=Homo sapiens GN=HSP90AA1 PE=1 SV=5	HS90A_HUMAN	85	4.66	Homo sapiens	0	0	0	0	0	0	0	0	0	0	0	0	0	0	0	0	0	0	0	0	0	0	0	0	0	0	0	0	0	0	0	0	0	0	0	0	0	0	0	0	0	0	0	0
203	Histone H4 OS=Homo sapiens GN=HIST1H4A PE=1 SV=2	H4_HUMAN	11	11.91	unknown	0	0	0	0	0	0	0	0	0	0	0	0	0	0	2	0	0	0	0	0	0	0	0	0	0	0	0	0	0	0.17	0	0	0	0	0	0	0	0	0	0	0	0	0	0
204	Protein S100-A9 OS=Homo sapiens GN=S100A9 PE=1 SV=1	S10A9_HUMAN	13	6.07	unknown	0	2	0	0	0	0	0	0	0	0	0	0	0	0	0	0	0.26	0	0	0	0	0	0	0	0	0	0	0	0	0	0	2	0	0	0	0	0	0	0	0	0	0	0	0
205	Selenoprotein P OS=Homo sapiens GN=SEPP1 PE=1 SV=3	SEPP1_HUMAN	43	7.92	Homo sapiens	0	0	0	0	0	0	0	0	0	0	0	0	0	0	0	0	0	0	0	0	0	0	0	0	0	0	0	0	0	0	0	0	0	0	0	0	0	0	0	0	0	0	0	0
206	Desmoglein-1 OS=Homo sapiens GN=DSG1 PE=1 SV=2	DSG1_HUMAN	114	4.66	Homo sapiens	0	0	0	0	0	0	0	0	0	2	2	3	0	0	0	0	0	0	0	0	0	0	0	0	0.028	0.031	0.04	0	0	0	0	0	0	0	0	0	0	0	0	2	2	3	0	0
207	Ig kappa chain V-II region TEW OS=Homo sapiens PE=1 SV=1	KV204_HUMAN	12	8.85	Homo sapiens	0	0	0	0	0	0	0	0	0	0	0	0	0	0	0	0	0	0	0	0	0	0	0	0	0	0	0	0	0	0	0	0	0	0	0	0	0	0	0	0	0	0	0	0
208	Apolipoprotein F OS=Homo sapiens GN=APOF PE=1 SV=2	APOF_HUMAN	35	5.36	Homo sapiens	0	0	0	0	0	0	0	0	0	0	0	0	0	0	0	0	0	0	0	0	0	0	0	0	0	0	0	0	0	0	0	0	0	0	0	0	0	0	0	0	0	0	0	0
209	Inter-alpha-trypsin inhibitor heavy chain H4 OS=Homo sapiens GN=ITIH4 PE=1 SV=4	ITIH4_HUMAN	103	6.97	Homo sapiens	0	0	0	0	0	0	0	0	0	0	0	0	0	0	0	0	0	0	0	0	0	0	0	0	0	0	0	0	0	0	0	0	0	0	0	0	0	0	0	0	0	0	0	0
210	Platelet basic protein OS=Homo sapiens GN=PPBP PE=1 SV=3	CXCL7_HUMAN	14	9.07	Homo sapiens	0	0	0	0	0	0	0	0	0	0	0	0	0	0	0	0	0	0	0	0	0	0	0	0	0	0	0	0	0	0	0	0	0	0	0	0	0	0	0	0	0	0	0	0
211	Collectin-11 OS=Homo sapiens GN=COLEC11 PE=1 SV=1	COL11_HUMAN	29	5.06	Homo sapiens	0	0	0	0	0	0	0	0	0	0	0	0	0	0	0	0	0	0	0	0	0	0	0	0	0	0	0	0	0	0	0	0	0	0	0	0	0	0	0	0	0	0	0	0
212	Extracellular superoxide dismutase [Cu-Zn] OS=Homo sapiens GN=SOD3 PE=1 SV=2	SODE_HUMAN	26	6.59	Homo sapiens	0	0	0	0	0	0	0	0	0	0	0	0	0	0	0	0	0	0	0	0	0	0	0	0	0	0	0	0	0	0	0	0	0	0	0	0	0	0	0	0	0	0	0	0
213	Fibulin-1 OS=Homo sapiens GN=FBLN1 PE=1 SV=4	FBLN1_HUMAN	77	4.86	Homo sapiens	0	0	0	0	0	0	0	0	0	0	0	0	0	0	0	0	0	0	0	0	0	0	0	0	0	0	0	0	0	0	0	0	0	0	0	0	0	0	0	0	0	0	0	0
214	Myosin light polypeptide 6 OS=Homo sapiens GN=MYL6 PE=1 SV=2	MYL6_HUMAN	17	4.29	Homo sapiens	0	0	0	0	0	0	0	0	0	0	0	0	0	0	0	0	0	0	0	0	0	0	0	0	0	0	0	0	0	0	0	0	0	0	0	0	0	0	0	0	0	0	0	0
215	Keratin, type II cuticular Hb4 OS=Homo sapiens GN=KRT84 PE=2 SV=2	KRT84_HUMAN	65	7.61	unknown	0	0	0	0	0	0	0	0	0	0	0	0	0	0	0	0	0	0	0	0	0	0	0	0	0	0	0	0	0	0	0	0	0	0	0	0	0	0	0	0	0	0	0	0
216	Amine oxidase [flavin-containing] B OS=Homo sapiens GN=MAOB PE=1 SV=3	AOFB_HUMAN	59	7.55	unknown	0	0	0	0	0	0	0	0	0	2	2	2	2	0	0	0	0	0	0	0	0	0	0	0	0.042	0.042	0.042	0.042	0	0	0	0	0	0	0	0	0	0	0	2	2	2	2	0
217	Angiotensinogen OS=Homo sapiens GN=AGT PE=1 SV=1	ANGT_HUMAN	53	6.27	Homo sapiens	0	0	0	0	0	0	0	0	0	0	0	0	0	0	0	0	0	0	0	0	0	0	0	0	0	0	0	0	0	0	0	0	0	0	0	0	0	0	0	0	0	0	0	0
218	Disintegrin and metalloproteinase domain-containing protein 10 OS=Homo sapiens GN=ADAM10 PE=1 SV=1	ADA10_HUMAN	84	7.81	Homo sapiens	0	0	0	0	0	0	0	0	0	0	0	0	0	2	2	0	0	0	0	0	0	0	0	0	0	0	0	0	0.029	0.029	0	0	0	0	0	0	0	0	0	0	0	0	0	2
219	GTP-binding nuclear protein Ran OS=Homo sapiens GN=RAN PE=1 SV=3	RAN_HUMAN	24	7.59	Homo sapiens	0	0	0	0	0	0	0	0	0	0	0	0	0	0	0	0	0	0	0	0	0	0	0	0	0	0	0	0	0	0	0	0	0	0	0	0	0	0	0	0	0	0	0	0
220	Ig kappa chain V-I region Scw OS=Homo sapiens PE=1 SV=1	KV117_HUMAN	12	8.85	unknown	0	0	0	0	0	0	0	0	0	7	0	0	0	0	0	0	0	0	0	0	0	0	0	0	0.38	0	0	0	0	0	0	0	0	0	0	0	0	0	0	2	0	0	0	0
221	Coagulation factor XII OS=Homo sapiens GN=F12 PE=1 SV=3	FA12_HUMAN	68	7.76	Homo sapiens	0	0	0	0	0	0	0	0	0	0	0	0	0	0	0	0	0	0	0	0	0	0	0	0	0	0	0	0	0	0	0	0	0	0	0	0	0	0	0	0	0	0	0	0
222	Ig kappa chain V-III region GOL OS=Homo sapiens PE=1 SV=1	KV307_HUMAN	12	9.53	unknown	0	0	0	0	0	0	0	0	0	0	0	0	0	0	0	0	0	0	0	0	0	0	0	0	0	0	0	0	0	0	0	0	0	0	0	0	0	0	0	0	0	0	0	0
223	Tubulin alpha-1B chain OS=Homo sapiens GN=TUBA1B PE=1 SV=1	TBA1B_HUMAN	50	4.7	Homo sapiens	0	0	0	0	0	0	0	0	0	0	0	0	0	0	0	0	0	0	0	0	0	0	0	0	0	0	0	0	0	0	0	0	0	0	0	0	0	0	0	0	0	0	0	0
224	Alpha-enolase OS=Homo sapiens GN=ENO1 PE=1 SV=2	ENOA_HUMAN	47	7.46	Homo sapiens	0	0	0	0	0	0	0	0	0	0	0	0	0	0	0	0	0	0	0	0	0	0	0	0	0	0	0	0	0	0	0	0	0	0	0	0	0	0	0	0	0	0	0	0
225	Fatty acid-binding protein, epidermal OS=Homo sapiens GN=FABP5 PE=1 SV=3	FABP5_HUMAN	15	7.05	Homo sapiens	2	2	0	0	0	0	0	0	0	0	0	0	0	0	0	0.13	0.13	0	0	0	0	0	0	0	0	0	0	0	0	0	2	2	0	0	0	0	0	0	0	0	0	0	0	0
226	Alpha-1B-glycoprotein OS=Homo sapiens GN=A1BG PE=1 SV=4	A1BG_HUMAN	54	5.71	Homo sapiens	0	0	0	0	0	0	0	0	0	0	0	0	0	0	0	0	0	0	0	0	0	0	0	0	0	0	0	0	0	0	0	0	0	0	0	0	0	0	0	0	0	0	0	0
227	Prolactin-inducible protein OS=Homo sapiens GN=PIP PE=1 SV=1	PIP_HUMAN	17	8.18	unknown	2	2	4	0	0	0	0	0	0	0	0	0	0	0	0	0.18	0.18	0.25	0	0	0	0	0	0	0	0	0	0	0	0	2	2	4	0	0	0	0	0	0	0	0	0	0	0
228	Four and a half LIM domains protein 1 OS=Homo sapiens GN=FHL1 PE=1 SV=4	FHL1_HUMAN	36	9.15	unknown	0	0	0	0	0	0	0	0	0	0	0	0	0	0	2	0	0	0	0	0	0	0	0	0	0	0	0	0	0	0.059	0	0	0	0	0	0	0	0	0	0	0	0	0	0
229	Platelet glycoprotein Ib alpha chain OS=Homo sapiens GN=GP1BA PE=1 SV=2	GP1BA_HUMAN	72	6.24	Homo sapiens	0	0	0	0	0	0	0	0	0	0	0	0	0	0	0	0	0	0	0	0	0	0	0	0	0	0	0	0	0	0	0	0	0	0	0	0	0	0	0	0	0	0	0	0
230	Retinol-binding protein 4 OS=Homo sapiens GN=RBP4 PE=1 SV=3	RET4_HUMAN	23	5.85	Homo sapiens	0	0	0	0	0	0	0	0	0	0	0	0	0	0	0	0	0	0	0	0	0	0	0	0	0	0	0	0	0	0	0	0	0	0	0	0	0	0	0	0	0	0	0	0
231	Fermitin family homolog 3 OS=Homo sapiens GN=FERMT3 PE=1 SV=1	URP2_HUMAN	76	6.98	Homo sapiens	0	0	0	0	0	0	0	0	0	0	0	0	0	0	0	0	0	0	0	0	0	0	0	0	0	0	0	0	0	0	0	0	0	0	0	0	0	0	0	0	0	0	0	0
232	Collagen alpha-1(XXI) chain OS=Homo sapiens GN=COL21A1 PE=2 SV=1	COLA1_HUMAN	99	8.48	unknown	0	0	0	0	0	0	0	0	0	0	0	0	0	0	0	0	0	0	0	0	0	0	0	0	0	0	0	0	0	0	0	0	0	0	0	0	0	0	0	0	0	0	0	0
233	40S ribosomal protein S13 OS=Homo sapiens GN=RPS13 PE=1 SV=2	RS13_HUMAN	17	11.19	unknown	0	0	0	0	0	0	0	0	0	0	0	0	0	0	0	0	0	0	0	0	0	0	0	0	0	0	0	0	0	0	0	0	0	0	0	0	0	0	0	0	0	0	0	0
234	Histone H2A type 1-C OS=Homo sapiens GN=HIST1H2AC PE=1 SV=3	H2A1C_HUMAN	14	11.66	unknown	0	0	0	0	0	0	0	0	0	0	0	0	0	0	0	0	0	0	0	0	0	0	0	0	0	0	0	0	0	0	0	0	0	0	0	0	0	0	0	0	0	0	0	0
235	Beta-2-microglobulin OS=Homo sapiens GN=B2M PE=1 SV=1	B2MG_HUMAN	14	6.51	Homo sapiens	0	0	0	0	0	0	0	0	0	0	0	0	0	0	3	0	0	0	0	0	0	0	0	0	0	0	0	0	0	0.35	0	0	0	0	0	0	0	0	0	0	0	0	0	0
236	Ras-related protein Rab-10 OS=Homo sapiens GN=RAB10 PE=1 SV=1	RAB10_HUMAN	23	8.61	Homo sapiens	0	0	0	0	0	0	0	0	0	0	0	0	0	0	0	0	0	0	0	0	0	0	0	0	0	0	0	0	0	0	0	0	0	0	0	0	0	0	0	0	0	0	0	0
237	Serum amyloid A-2 protein OS=Homo sapiens GN=SAA2 PE=1 SV=1	SAA2_HUMAN	14	9.48	Homo sapiens	0	0	0	0	0	0	0	0	0	0	0	0	0	0	0	0	0	0	0	0	0	0	0	0	0	0	0	0	0	0	0	0	0	0	0	0	0	0	0	0	0	0	0	0
238	HLA class I histocompatibility antigen, B-40 alpha chain OS=Homo sapiens GN=HLA-B PE=1 SV=1	1B40_HUMAN	41	6.51	unknown	0	0	0	0	0	0	0	0	0	0	0	0	8	12	12	0	0	0	0	0	0	0	0	0	0	0	0	0.29	0.36	0.36	0	0	0	0	0	0	0	0	0	0	0	0	2	3
239	Voltage-dependent anion-selective channel protein 2 OS=Homo sapiens GN=VDAC2 PE=1 SV=2	VDAC2_HUMAN	32	7.65	unknown	0	0	0	0	0	0	0	0	0	0	0	0	2	2	0	0	0	0	0	0	0	0	0	0	0	0	0	0.13	0.11	0	0	0	0	0	0	0	0	0	0	0	0	0	2	2
240	Collectin-10 OS=Homo sapiens GN=COLEC10 PE=2 SV=2	COL10_HUMAN	31	7.39	Homo sapiens	0	0	0	0	0	0	0	0	0	0	0	0	0	0	0	0	0	0	0	0	0	0	0	0	0	0	0	0	0	0	0	0	0	0	0	0	0	0	0	0	0	0	0	0
241	tRNA-dihydrouridine(47) synthase [NAD(P)(+)]-like OS=Homo sapiens GN=DUS3L PE=1 SV=2	DUS3L_HUMAN	72	8.4	unknown	0	0	0	0	0	0	0	0	0	0	0	0	0	0	0	0	0	0	0	0	0	0	0	0	0	0	0	0	0	0	0	0	0	0	0	0	0	0	0	0	0	0	0	0
242	Cathelicidin antimicrobial peptide OS=Homo sapiens GN=CAMP PE=1 SV=1	CAMP_HUMAN	19	10.03	Homo sapiens	0	0	0	0	0	0	0	0	0	0	0	0	3	0	2	0	0	0	0	0	0	0	0	0	0	0	0	0.19	0	0.11	0	0	0	0	0	0	0	0	0	0	0	0	3	0
243	Barrier-to-autointegration factor OS=Homo sapiens GN=BANF1 PE=1 SV=1	BAF_HUMAN	10	5.88	unknown	0	0	0	0	0	0	0	0	0	0	0	0	0	0	0	0	0	0	0	0	0	0	0	0	0	0	0	0	0	0	0	0	0	0	0	0	0	0	0	0	0	0	0	0
244	IQ and AAA domain-containing protein 1-like OS=Homo sapiens GN=IQCA1L PE=3 SV=2	IQCAL_HUMAN	95	9.79	unknown	0	0	0	0	0	0	2	0	2	0	0	0	0	0	0	0	0	0	0	0	0	0.027	0	0.027	0	0	0	0	0	0	0	0	0	0	0	0	2	0	2	0	0	0	0	0
245	10 kDa heat shock protein, mitochondrial OS=Homo sapiens GN=HSPE1 PE=1 SV=2	CH10_HUMAN	11	9.49	unknown	0	0	0	0	0	0	0	0	0	0	0	0	2	0	0	0	0	0	0	0	0	0	0	0	0	0	0	0.25	0	0	0	0	0	0	0	0	0	0	0	0	0	0	2	0
246	40S ribosomal protein S9 OS=Homo sapiens GN=RPS9 PE=1 SV=3	RS9_HUMAN	23	11.32	unknown	0	0	0	0	0	0	0	0	0	0	0	0	0	0	0	0	0	0	0	0	0	0	0	0	0	0	0	0	0	0	0	0	0	0	0	0	0	0	0	0	0	0	0	0
247	Caspase-14 OS=Homo sapiens GN=CASP14 PE=1 SV=2	CASPE_HUMAN	28	5.28	unknown	0	2	2	0	0	0	0	0	0	0	0	0	0	0	0	0	0.11	0.11	0	0	0	0	0	0	0	0	0	0	0	0	0	2	2	0	0	0	0	0	0	0	0	0	0	0
248	SPARC OS=Homo sapiens GN=SPARC PE=1 SV=1	SPRC_HUMAN	35	4.47	Homo sapiens	0	0	0	0	0	0	0	0	0	0	0	0	0	0	0	0	0	0	0	0	0	0	0	0	0	0	0	0	0	0	0	0	0	0	0	0	0	0	0	0	0	0	0	0
249	Tropomyosin beta chain OS=Homo sapiens GN=TPM2 PE=1 SV=1	TPM2_HUMAN	33	4.36	unknown	0	0	0	0	0	0	0	0	0	0	0	0	0	0	0	0	0	0	0	0	0	0	0	0	0	0	0	0	0	0	0	0	0	0	0	0	0	0	0	0	0	0	0	0
250	L-lactate dehydrogenase A chain OS=Homo sapiens GN=LDHA PE=1 SV=2	LDHA_HUMAN	37	8.45	unknown	0	0	0	0	0	0	0	0	0	0	0	0	0	0	0	0	0	0	0	0	0	0	0	0	0	0	0	0	0	0	0	0	0	0	0	0	0	0	0	0	0	0	0	0
251	Endonuclease domain-containing 1 protein OS=Homo sapiens GN=ENDOD1 PE=1 SV=2	ENDD1_HUMAN	55	5.38	Homo sapiens	0	0	0	0	0	0	0	0	0	0	0	0	0	0	0	0	0	0	0	0	0	0	0	0	0	0	0	0	0	0	0	0	0	0	0	0	0	0	0	0	0	0	0	0
252	Thioredoxin-dependent peroxide reductase, mitochondrial OS=Homo sapiens GN=PRDX3 PE=1 SV=3	PRDX3_HUMAN	28	7.88	Homo sapiens	0	0	0	0	0	0	0	0	0	0	0	0	2	0	0	0	0	0	0	0	0	0	0	0	0	0	0	0.082	0	0	0	0	0	0	0	0	0	0	0	0	0	0	2	0
253	Choline transporter-like protein 1 OS=Homo sapiens GN=SLC44A1 PE=1 SV=1	CTL1_HUMAN	73	8.69	unknown	0	0	0	0	0	0	0	0	0	0	0	0	2	0	0	0	0	0	0	0	0	0	0	0	0	0	0	0.044	0	0	0	0	0	0	0	0	0	0	0	0	0	0	2	0
254	Junctional adhesion molecule A OS=Homo sapiens GN=F11R PE=1 SV=1	JAM1_HUMAN	33	8.02	Homo sapiens	0	0	0	0	0	0	0	0	0	0	0	0	0	0	2	0	0	0	0	0	0	0	0	0	0	0	0	0	0	0.054	0	0	0	0	0	0	0	0	0	0	0	0	0	0
255	Ras-related protein Rap-1A OS=Homo sapiens GN=RAP1A PE=1 SV=1	RAP1A_HUMAN	21	6.55	unknown	0	0	0	0	0	0	0	0	0	0	0	0	0	0	0	0	0	0	0	0	0	0	0	0	0	0	0	0	0	0	0	0	0	0	0	0	0	0	0	0	0	0	0	0
256	Aggrecan core protein OS=Homo sapiens GN=ACAN PE=1 SV=2	PGCA_HUMAN	250	3.82	Homo sapiens	0	0	0	0	0	0	0	0	0	0	0	0	0	0	0	0	0	0	0	0	0	0	0	0	0	0	0	0	0	0	0	0	0	0	0	0	0	0	0	0	0	0	0	0
257	Tropomyosin alpha-1 chain OS=Homo sapiens GN=TPM1 PE=1 SV=2	TPM1_HUMAN	33	4.39	Homo sapiens	0	0	0	0	0	0	0	0	0	0	0	0	0	0	0	0	0	0	0	0	0	0	0	0	0	0	0	0	0	0	0	0	0	0	0	0	0	0	0	0	0	0	0	0
258	Lactotransferrin OS=Homo sapiens GN=LTF PE=1 SV=6	TRFL_HUMAN	78	8.17	unknown	0	0	0	0	0	0	0	0	0	0	0	0	0	0	0	0	0	0	0	0	0	0	0	0	0	0	0	0	0	0	0	0	0	0	0	0	0	0	0	0	0	0	0	0
259	Complement component C6 OS=Homo sapiens GN=C6 PE=1 SV=3	CO6_HUMAN	105	6.74	Homo sapiens	0	0	0	0	0	0	0	0	0	0	0	0	0	0	0	0	0	0	0	0	0	0	0	0	0	0	0	0	0	0	0	0	0	0	0	0	0	0	0	0	0	0	0	0
260	Synaptotagmin-like protein 4 OS=Homo sapiens GN=SYTL4 PE=1 SV=2	SYTL4_HUMAN	76	9.42	Homo sapiens	0	0	0	0	0	0	0	0	0	0	0	0	0	0	0	0	0	0	0	0	0	0	0	0	0	0	0	0	0	0	0	0	0	0	0	0	0	0	0	0	0	0	0	0
261	60S ribosomal protein L12 OS=Homo sapiens GN=RPL12 PE=1 SV=1	RL12_HUMAN	18	10.11	unknown	0	0	0	0	0	0	0	0	0	0	0	0	0	0	0	0	0	0	0	0	0	0	0	0	0	0	0	0	0	0	0	0	0	0	0	0	0	0	0	0	0	0	0	0
262	60 kDa heat shock protein, mitochondrial OS=Homo sapiens GN=HSPD1 PE=1 SV=2	CH60_HUMAN	61	5.55	Homo sapiens	0	0	0	0	0	0	0	0	0	0	0	0	0	0	0	0	0	0	0	0	0	0	0	0	0	0	0	0	0	0	0	0	0	0	0	0	0	0	0	0	0	0	0	0
263	Complement factor B OS=Homo sapiens GN=CFB PE=1 SV=2	CFAB_HUMAN	86	7.07	Homo sapiens	0	0	0	0	0	0	0	0	0	0	0	0	2	0	0	0	0	0	0	0	0	0	0	0	0	0	0	0.031	0	0	0	0	0	0	0	0	0	0	0	0	0	0	2	0
264	Latent-transforming growth factor beta-binding protein 1 OS=Homo sapiens GN=LTBP1 PE=1 SV=4	LTBP1_HUMAN	187	5.85	Homo sapiens	0	0	0	0	0	0	0	0	0	0	0	0	0	0	2	0	0	0	0	0	0	0	0	0	0	0	0	0	0	0.021	0	0	0	0	0	0	0	0	0	0	0	0	0	0
[truncated: 143 more columns]

## Sheet: RPA
						CHOL
Brain tumor						Spectral counts															Spectral counts / MW															RPA%
						CHOL_A			CHOL_B			CHOL_C			CHOL_D			CHOL_E																		21.2365	22.3423	22.1723	21.7267	20.5462	21.0842	17.4394	17.4637	16.3879	37.0103	36.9468	35.9663	42.4104	41.9787
#	Identified Proteins (264)	Accession Number	Molecular Weight	pI	Taxonomy	2016-11-16_CHOLPC_BrainCancer_A_01	2016-11-16_CHOLPC_BrainCancer_A_02	2016-11-16_CHOLPC_BrainCancer_A_03	2016-11-16_CHOLPC_BrainCancer_B_01	2016-11-16_CHOLPC_BrainCancer_B_02	2016-11-16_CHOLPC_BrainCancer_B_03	2016-11-16_CHOLPC_BrainCancer_C_01	2016-11-16_CHOLPC_BrainCancer_C_02	2016-11-16_CHOLPC_BrainCancer_C_03	2016-11-16_CHOLPC_BrainCancer_D_01	2016-11-16_CHOLPC_BrainCancer_D_02	2016-11-16_CHOLPC_BrainCancer_D_03	2016-11-16_CHOLPC_BrainCancer_E_01	2016-11-16_CHOLPC_BrainCancer_E_02	2016-11-16_CHOLPC_BrainCancer_E_03	2016-11-16_CHOLPC_BrainCancer_A_01	2016-11-16_CHOLPC_BrainCancer_A_02	2016-11-16_CHOLPC_BrainCancer_A_03	2016-11-16_CHOLPC_BrainCancer_B_01	2016-11-16_CHOLPC_BrainCancer_B_02	2016-11-16_CHOLPC_BrainCancer_B_03	2016-11-16_CHOLPC_BrainCancer_C_01	2016-11-16_CHOLPC_BrainCancer_C_02	2016-11-16_CHOLPC_BrainCancer_C_03	2016-11-16_CHOLPC_BrainCancer_D_01	2016-11-16_CHOLPC_BrainCancer_D_02	2016-11-16_CHOLPC_BrainCancer_D_03	2016-11-16_CHOLPC_BrainCancer_E_01	2016-11-16_CHOLPC_BrainCancer_E_02	2016-11-16_CHOLPC_BrainCancer_E_03	2016-11-16_CHOLPC_BrainCancer_A_01	2016-11-16_CHOLPC_BrainCancer_A_02	2016-11-16_CHOLPC_BrainCancer_A_03	2016-11-16_CHOLPC_BrainCancer_B_01	2016-11-16_CHOLPC_BrainCancer_B_02	2016-11-16_CHOLPC_BrainCancer_B_03	2016-11-16_CHOLPC_BrainCancer_C_01	2016-11-16_CHOLPC_BrainCancer_C_02	2016-11-16_CHOLPC_BrainCancer_C_03	2016-11-16_CHOLPC_BrainCancer_D_01	2016-11-16_CHOLPC_BrainCancer_D_02	2016-11-16_CHOLPC_BrainCancer_D_03	2016-11-16_CHOLPC_BrainCancer_E_01	2016-11-16_CHOLPC_BrainCancer_E_02
1	Apolipoprotein B-100 OS=Homo sapiens GN=APOB PE=1 SV=2	APOB_HUMAN	516	7.04	Homo sapiens	54	56	61	66	71	66	48	51	44	140	139	127	141	140	133	0.104651	0.108527	0.118217	0.127907	0.137597	0.127907	0.0930233	0.0988372	0.0852713	0.271318	0.26938	0.246124	0.273256	0.271318	0.257752	0.00492788	0.00485747	0.00533176	0.00588709	0.00669697	0.00606649	0.00533409	0.00565959	0.00520331	0.00733087	0.00729102	0.00684318	0.00644314	0.00646323
2	Ig gamma-1 chain C region OS=Homo sapiens GN=IGHG1 PE=1 SV=1	IGHG1_HUMAN	36	8.31	Homo sapiens	52	60	59	61	51	62	49	51	52	104	115	104	134	126	125	1.44444	1.66667	1.63889	1.69444	1.41667	1.72222	1.36111	1.41667	1.44444	2.88889	3.19444	2.88889	3.72222	3.5	3.47222	0.0680169	0.0745968	0.0739162	0.0779891	0.0689505	0.0816831	0.0780481	0.0811209	0.0881409	0.0780563	0.0864606	0.080322	0.0877668	0.0833756
3	Complement C3 OS=Homo sapiens GN=C3 PE=1 SV=2	CO3_HUMAN	187	6.34	Homo sapiens	27	24	26	42	42	38	21	24	25	43	45	41	59	61	55	0.144385	0.128342	0.139037	0.224599	0.224599	0.203209	0.112299	0.128342	0.13369	0.229947	0.240642	0.219251	0.315508	0.326203	0.294118	0.0067989	0.00574435	0.00627078	0.0103375	0.0109314	0.00963796	0.00643942	0.00734911	0.00815783	0.00621304	0.00651319	0.00609601	0.00743941	0.00777069
4	Vitronectin OS=Homo sapiens GN=VTN PE=1 SV=1	VTNC_HUMAN	54	5.54	Homo sapiens	4	5	6	5	3	3	4	0	3	6	5	5	5	3	2	0.0740741	0.0925926	0.111111	0.0925926	0.0555556	0.0555556	0.0740741	0	0.0555556	0.111111	0.0925926	0.0925926	0.0925926	0.0555556	0.037037	0.00348805	0.00414427	0.00501127	0.0042617	0.00270394	0.00263494	0.00424752	0	0.00339003	0.00300216	0.0025061	0.00257442	0.00218325	0.00132342
5	Ig kappa chain C region OS=Homo sapiens GN=IGKC PE=1 SV=1	IGKC_HUMAN	12	5.68	Homo sapiens	29	34	34	28	27	29	24	23	21	64	60	64	75	83	70	2.41667	2.83333	2.83333	2.33333	2.25	2.41667	2	1.91667	1.75	5.33333	5	5.33333	6.25	6.91667	5.83333	0.113798	0.126815	0.127787	0.107395	0.10951	0.11462	0.114683	0.109752	0.106786	0.144104	0.13533	0.148287	0.14737	0.164766
6	Keratin, type II cytoskeletal 1 OS=Homo sapiens GN=KRT1 PE=1 SV=6	K2C1_HUMAN	66	8.33	Homo sapiens	54	56	56	53	48	47	44	43	44	61	69	61	57	62	60	0.818182	0.848485	0.848485	0.80303	0.727273	0.712121	0.666667	0.651515	0.666667	0.924242	1.04545	0.924242	0.863636	0.939394	0.909091	0.0385271	0.0379766	0.0382679	0.0369605	0.035397	0.0337751	0.0382277	0.0373069	0.0406804	0.0249726	0.0282962	0.0256974	0.0203638	0.0223779
7	Serum albumin OS=Homo sapiens GN=ALB PE=1 SV=2	ALBU_HUMAN	69	6.21	Homo sapiens	42	40	42	29	26	30	32	32	37	51	54	49	69	77	72	0.608696	0.57971	0.608696	0.42029	0.376812	0.434783	0.463768	0.463768	0.536232	0.73913	0.782609	0.710145	1	1.11594	1.04348	0.0286627	0.0259467	0.027453	0.0193444	0.0183398	0.0206213	0.0265931	0.0265562	0.0327212	0.0199709	0.021182	0.0197447	0.0235791	0.0265835
8	Ig mu chain C region OS=Homo sapiens GN=IGHM PE=1 SV=3	IGHM_HUMAN	49	6.77	Homo sapiens	49	50	46	42	40	44	38	35	33	77	88	79	45	48	47	1	1.02041	0.938776	0.857143	0.816327	0.897959	0.77551	0.714286	0.673469	1.57143	1.79592	1.61224	0.918367	0.979592	0.959184	0.0470887	0.0456715	0.0423401	0.0394511	0.0397314	0.0425892	0.0444689	0.0409013	0.0410955	0.0424592	0.0486082	0.0448265	0.0216543	0.0233355
9	C4b-binding protein alpha chain OS=Homo sapiens GN=C4BPA PE=1 SV=2	C4BPA_HUMAN	67	7.31	Homo sapiens	18	24	24	25	21	21	8	11	12	44	37	39	16	17	16	0.268657	0.358209	0.358209	0.373134	0.313433	0.313433	0.119403	0.164179	0.179104	0.656716	0.552239	0.58209	0.238806	0.253731	0.238806	0.0126507	0.0160327	0.0161557	0.017174	0.0152551	0.0148658	0.00684674	0.00940119	0.0109291	0.0177441	0.0149469	0.0161843	0.00563084	0.00604429
10	Complement C4-A OS=Homo sapiens GN=C4A PE=1 SV=2	CO4A_HUMAN	193	7.08	Homo sapiens	12	15	13	17	18	18	9	9	9	26	22	26	34	38	31	0.0621762	0.0777202	0.0673575	0.0880829	0.0932642	0.0932642	0.0466321	0.0466321	0.0466321	0.134715	0.11399	0.134715	0.176166	0.196891	0.160622	0.00292779	0.00347861	0.00303792	0.00405413	0.00453926	0.00442342	0.00267395	0.00267024	0.00284552	0.00363993	0.00308524	0.00374559	0.00415384	0.00469027
11	Ig gamma-2 chain C region OS=Homo sapiens GN=IGHG2 PE=1 SV=2	IGHG2_HUMAN	36	7.66	Homo sapiens	44	40	44	59	48	49	25	31	29	65	67	61	78	70	72	1.22222	1.11111	1.22222	1.63889	1.33333	1.36111	0.694444	0.861111	0.805556	1.80556	1.86111	1.69444	2.16667	1.94444	2	0.0575528	0.0497312	0.0551239	0.0754321	0.0648945	0.064556	0.0398205	0.0493088	0.0491555	0.0487852	0.0503727	0.0471119	0.0510881	0.0463198
12	Keratin, type I cytoskeletal 9 OS=Homo sapiens GN=KRT9 PE=1 SV=3	K1C9_HUMAN	62	4.89	Homo sapiens	31	33	30	33	30	31	35	26	20	35	37	39	44	44	39	0.5	0.532258	0.483871	0.532258	0.483871	0.5	0.564516	0.419355	0.322581	0.564516	0.596774	0.629032	0.709677	0.709677	0.629032	0.0235443	0.0238228	0.0218233	0.0244979	0.0235504	0.0237144	0.0323702	0.024013	0.0196841	0.0152529	0.0161522	0.0174895	0.0167336	0.0169057
13	Fibrinogen beta chain OS=Homo sapiens GN=FGB PE=1 SV=2	FIBB_HUMAN	56	8.38	Homo sapiens	8	7	7	15	13	15	3	4	5	22	26	24	24	23	22	0.142857	0.125	0.125	0.267857	0.232143	0.267857	0.0535714	0.0714286	0.0892857	0.392857	0.464286	0.428571	0.428571	0.410714	0.392857	0.00672695	0.00559476	0.00563768	0.0123285	0.0112986	0.0127042	0.00307186	0.00409013	0.00544827	0.0106148	0.0125663	0.0119159	0.0101053	0.00978388
14	Keratin, type I cytoskeletal 10 OS=Homo sapiens GN=KRT10 PE=1 SV=6	K1C10_HUMAN	59	4.88	Homo sapiens	23	25	21	22	24	24	21	23	20	26	27	26	26	27	22	0.389831	0.423729	0.355932	0.372881	0.40678	0.40678	0.355932	0.389831	0.338983	0.440678	0.457627	0.440678	0.440678	0.457627	0.372881	0.0183566	0.0189653	0.016053	0.0171624	0.0197983	0.0192931	0.0204097	0.0223224	0.0206849	0.0119069	0.0123861	0.0122525	0.0103908	0.0109014
15	Complement factor H OS=Homo sapiens GN=CFH PE=1 SV=4	CFAH_HUMAN	139	6.59	Homo sapiens	7	7	9	14	12	13	12	11	9	18	20	21	17	18	10	0.0503597	0.0503597	0.0647482	0.100719	0.0863309	0.0935252	0.0863309	0.0791367	0.0647482	0.129496	0.143885	0.151079	0.122302	0.129496	0.0719424	0.00237137	0.002254	0.00292024	0.00463575	0.00420181	0.0044358	0.00495034	0.00453151	0.00395097	0.00349893	0.00389438	0.00420057	0.00288378	0.00308481
16	Apolipoprotein D OS=Homo sapiens GN=APOD PE=1 SV=1	APOD_HUMAN	21	4.79	Homo sapiens	6	11	9	10	12	9	10	7	11	19	16	14	17	22	18	0.285714	0.52381	0.428571	0.47619	0.571429	0.428571	0.47619	0.333333	0.52381	0.904762	0.761905	0.666667	0.809524	1.04762	0.857143	0.0134539	0.0234447	0.0193292	0.0219173	0.0278119	0.0203267	0.0273055	0.0190873	0.0319632	0.0244462	0.0206217	0.0185358	0.0190879	0.024956
17	Filamin-A OS=Homo sapiens GN=FLNA PE=1 SV=4	FLNA_HUMAN	281	5.95	Homo sapiens	14	17	13	10	11	15	11	9	9	25	26	26	45	44	43	0.0498221	0.0604982	0.0462633	0.0355872	0.0391459	0.0533808	0.0391459	0.0320285	0.0320285	0.088968	0.0925267	0.0925267	0.160142	0.156584	0.153025	0.00234605	0.00270778	0.00208654	0.00163795	0.00190527	0.00253179	0.00224468	0.00183401	0.0019544	0.00240387	0.00250432	0.00257259	0.00377602	0.00373007
18	Fibrinogen gamma chain OS=Homo sapiens GN=FGG PE=1 SV=3	FIBG_HUMAN	52	5.32	Homo sapiens	7	8	7	10	13	12	4	3	6	11	13	9	17	21	15	0.134615	0.153846	0.134615	0.192308	0.25	0.230769	0.0769231	0.0576923	0.115385	0.211538	0.25	0.173077	0.326923	0.403846	0.288462	0.00633886	0.00688586	0.00607134	0.00885122	0.0121677	0.0109451	0.00441088	0.00330356	0.00704084	0.00571566	0.00676648	0.00481219	0.00770857	0.00962027
19	Prothrombin OS=Homo sapiens GN=F2 PE=1 SV=2	THRB_HUMAN	70	5.7	Homo sapiens	0	0	0	0	0	0	0	0	0	0	0	0	0	0	0	0	0	0	0	0	0	0	0	0	0	0	0	0	0	0	0	0	0	0	0	0	0	0	0	0	0	0	0	0
20	Alpha-2-macroglobulin OS=Homo sapiens GN=A2M PE=1 SV=3	A2MG_HUMAN	163	6.43	Homo sapiens	17	17	15	22	23	29	0	4	0	18	19	20	42	39	48	0.104294	0.104294	0.0920245	0.134969	0.141104	0.177914	0	0.0245399	0	0.110429	0.116564	0.122699	0.257669	0.239264	0.294479	0.00491109	0.00466802	0.00415044	0.00621214	0.00686767	0.00843827	0	0.0014052	0	0.00298375	0.00315492	0.00341151	0.00607561	0.00569965
21	Immunoglobulin lambda-like polypeptide 5 OS=Homo sapiens GN=IGLL5 PE=2 SV=2	IGLL5_HUMAN	23	9.05	Homo sapiens	8	10	9	14	13	15	11	11	10	23	22	22	25	29	24	0.347826	0.434783	0.391304	0.608696	0.565217	0.652174	0.478261	0.478261	0.434783	1	0.956522	0.956522	1.08696	1.26087	1.04348	0.0163787	0.01946	0.0176484	0.028016	0.0275096	0.0309319	0.0274242	0.0273861	0.0265307	0.0270195	0.0258891	0.0265949	0.0256295	0.0300359
22	Keratin, type II cytoskeletal 6A OS=Homo sapiens GN=KRT6A PE=1 SV=3	K2C6A_HUMAN	60	8.16	Homo sapiens	12	13	14	13	12	13	22	15	20	20	22	22	33	32	29	0.2	0.216667	0.233333	0.216667	0.2	0.216667	0.366667	0.25	0.333333	0.333333	0.366667	0.366667	0.55	0.533333	0.483333	0.00941773	0.00969758	0.0105237	0.00997237	0.00973418	0.0102763	0.0210252	0.0143154	0.0203402	0.00900649	0.00992417	0.0101947	0.0129685	0.0127049
23	Hyaluronan-binding protein 2 OS=Homo sapiens GN=HABP2 PE=1 SV=1	HABP2_HUMAN	63	6.52	Homo sapiens	0	0	0	0	0	0	0	0	0	0	0	0	0	0	0	0	0	0	0	0	0	0	0	0	0	0	0	0	0	0	0	0	0	0	0	0	0	0	0	0	0	0	0	0
24	Keratin, type I cytoskeletal 16 OS=Homo sapiens GN=KRT16 PE=1 SV=4	K1C16_HUMAN	51	4.69	Homo sapiens	14	13	12	16	19	15	18	21	18	23	19	23	32	34	31	0.27451	0.254902	0.235294	0.313725	0.372549	0.294118	0.352941	0.411765	0.352941	0.45098	0.372549	0.45098	0.627451	0.666667	0.607843	0.0129263	0.0114089	0.0106121	0.0144396	0.0181323	0.0139497	0.0202382	0.0235784	0.0215367	0.0121853	0.0100834	0.012539	0.0147948	0.0158811
25	Keratin, type II cytoskeletal 2 epidermal OS=Homo sapiens GN=KRT2 PE=1 SV=2	K22E_HUMAN	65	8.17	Homo sapiens	26	23	28	21	21	25	22	17	20	25	24	25	28	28	27	0.4	0.353846	0.430769	0.323077	0.323077	0.384615	0.338462	0.261538	0.307692	0.384615	0.369231	0.384615	0.430769	0.430769	0.415385	0.0188355	0.0158375	0.0194283	0.01487	0.0157244	0.0182419	0.0194079	0.0149762	0.0187756	0.0103921	0.00999357	0.0106938	0.0101572	0.0102616
26	Ig lambda-2 chain C regions OS=Homo sapiens GN=IGLC2 PE=1 SV=1	LAC2_HUMAN	11	7.34	Homo sapiens	16	17	17	20	18	19	17	16	15	24	26	23	30	30	25	1.45455	1.54545	1.54545	1.81818	1.63636	1.72727	1.54545	1.45455	1.36364	2.18182	2.36364	2.09091	2.72727	2.72727	2.27273	0.0684926	0.0691716	0.0697022	0.0836843	0.0796433	0.0819226	0.0886186	0.0832899	0.0832099	0.0589516	0.063974	0.0581352	0.0643068	0.064968
27	Thrombospondin-1 OS=Homo sapiens GN=THBS1 PE=1 SV=2	TSP1_HUMAN	129	4.51	Homo sapiens	2	0	2	2	2	3	3	2	3	0	0	0	16	13	10	0.0155039	0	0.0155039	0.0155039	0.0155039	0.0232558	0.0232558	0.0155039	0.0232558	0	0	0	0.124031	0.100775	0.0775194	0.000730057	0	0.000699247	0.000713587	0.000754588	0.001103	0.00133352	0.00088778	0.00141908	0	0	0	0.00292455	0.00240063
28	Apolipoprotein(a) OS=Homo sapiens GN=LPA PE=1 SV=1	APOA_HUMAN	501	5.77	Homo sapiens	2	0	2	27	27	29	3	5	4	23	24	21	13	9	12	0.00399202	0	0.00399202	0.0538922	0.0538922	0.0578842	0.00598802	0.00998004	0.00798403	0.0459082	0.0479042	0.0419162	0.0259481	0.0179641	0.0239521	0.000187979	0	0.000180046	0.00248046	0.00262298	0.00274538	0.000343362	0.000571475	0.00048719	0.00124042	0.00129657	0.00116543	0.000611834	0.000427933
29	CD5 antigen-like OS=Homo sapiens GN=CD5L PE=1 SV=1	CD5L_HUMAN	38	5.15	Homo sapiens	13	11	13	11	13	12	10	10	10	16	14	16	14	16	15	0.342105	0.289474	0.342105	0.289474	0.342105	0.315789	0.263158	0.263158	0.263158	0.421053	0.368421	0.421053	0.368421	0.421053	0.394737	0.0161093	0.0129563	0.0154294	0.0133234	0.0166506	0.0149775	0.0150899	0.0150689	0.0160581	0.0113766	0.00997166	0.0117068	0.00868705	0.0100302
30	Haptoglobin OS=Homo sapiens GN=HP PE=1 SV=1	HPT_HUMAN	45	6.56	Homo sapiens	11	10	10	6	7	8	6	6	7	10	15	8	20	13	20	0.244444	0.222222	0.222222	0.133333	0.155556	0.177778	0.133333	0.133333	0.155556	0.222222	0.333333	0.177778	0.444444	0.288889	0.444444	0.0115106	0.00994624	0.0100225	0.00613685	0.00757103	0.0084318	0.00764553	0.0076349	0.00949209	0.00600433	0.00902198	0.00494289	0.0104796	0.0068818
31	Serotransferrin OS=Homo sapiens GN=TF PE=1 SV=3	TRFE_HUMAN	77	7.13	Homo sapiens	11	12	11	4	3	3	14	17	15	9	15	13	17	17	17	0.142857	0.155844	0.142857	0.0519481	0.038961	0.038961	0.181818	0.220779	0.194805	0.116883	0.194805	0.168831	0.220779	0.220779	0.220779	0.00672695	0.00697529	0.00644306	0.00239098	0.00189627	0.00184788	0.0104257	0.0126422	0.0118871	0.00315812	0.00527258	0.00469414	0.00520579	0.00525932
32	Plasminogen OS=Homo sapiens GN=PLG PE=1 SV=2	PLMN_HUMAN	91	7.25	Homo sapiens	0	0	2	9	9	7	0	0	0	12	11	14	17	14	13	0	0	0.021978	0.0989011	0.0989011	0.0769231	0	0	0	0.131868	0.120879	0.153846	0.186813	0.153846	0.142857	0	0	0.00099124	0.00455206	0.00481361	0.00364838	0	0	0	0.00356301	0.00327171	0.0042775	0.0044049	0.00366486
33	Inter-alpha-trypsin inhibitor heavy chain H2 OS=Homo sapiens GN=ITIH2 PE=1 SV=2	ITIH2_HUMAN	106	6.85	Homo sapiens	0	0	0	0	0	0	0	0	0	0	0	0	3	0	0	0	0	0	0	0	0	0	0	0	0	0	0	0.0283019	0	0	0	0	0	0	0	0	0	0	0	0	0	0	0.000667334	0
34	Apolipoprotein A-I OS=Homo sapiens GN=APOA1 PE=1 SV=1	APOA1_HUMAN	31	5.5	Homo sapiens	6	4	5	5	4	2	3	4	3	4	6	4	5	4	5	0.193548	0.129032	0.16129	0.16129	0.129032	0.0645161	0.0967742	0.129032	0.0967742	0.129032	0.193548	0.129032	0.16129	0.129032	0.16129	0.00911393	0.00577524	0.00727442	0.0074236	0.00628012	0.00305993	0.00554918	0.00738862	0.00590522	0.00348638	0.00523857	0.00358758	0.00380309	0.00307376
35	Integrin beta-3 OS=Homo sapiens GN=ITGB3 PE=1 SV=2	ITB3_HUMAN	87	4.85	Homo sapiens	6	4	4	4	4	5	3	3	4	12	13	12	24	29	31	0.0689655	0.045977	0.045977	0.045977	0.045977	0.0574713	0.0344828	0.0344828	0.045977	0.137931	0.149425	0.137931	0.275862	0.333333	0.356322	0.00324749	0.00205784	0.00207363	0.00211615	0.00223774	0.0027258	0.00197729	0.00197454	0.00280554	0.00372683	0.00404433	0.003835	0.00650459	0.00794054
36	Fibrinogen alpha chain OS=Homo sapiens GN=FGA PE=1 SV=2	FIBA_HUMAN	95	5.87	Homo sapiens	5	4	3	10	7	7	0	2	2	4	2	2	5	4	7	0.0526316	0.0421053	0.0315789	0.105263	0.0736842	0.0736842	0	0.0210526	0.0210526	0.0421053	0.0210526	0.0210526	0.0526316	0.0421053	0.0736842	0.00247835	0.00188455	0.00142426	0.00484488	0.00358628	0.00349476	0	0.00120551	0.00128464	0.00113766	0.000569809	0.000585342	0.00124101	0.00100302
37	Inter-alpha-trypsin inhibitor heavy chain H1 OS=Homo sapiens GN=ITIH1 PE=1 SV=3	ITIH1_HUMAN	101	6.78	Homo sapiens	0	0	0	0	0	0	0	0	0	0	0	0	0	0	2	0	0	0	0	0	0	0	0	0	0	0	0	0	0	0.019802	0	0	0	0	0	0	0	0	0	0	0	0	0	0
38	Hornerin OS=Homo sapiens GN=HRNR PE=1 SV=2	HORN_HUMAN	282	10.24	Homo sapiens	8	9	9	10	8	11	8	7	7	4	14	13	20	20	18	0.0283688	0.0319149	0.0319149	0.035461	0.0283688	0.0390071	0.0283688	0.0248227	0.0248227	0.0141844	0.0496454	0.0460993	0.070922	0.070922	0.0638298	0.00133585	0.00142845	0.00143941	0.00163214	0.00138074	0.00185006	0.00162671	0.00142139	0.0015147	0.000383255	0.0013437	0.00128173	0.00167228	0.00168948
39	Ig alpha-1 chain C region OS=Homo sapiens GN=IGHA1 PE=1 SV=2	IGHA1_HUMAN	38	6.49	Homo sapiens	3	4	5	6	5	5	4	4	4	6	7	8	10	7	16	0.0789474	0.105263	0.131579	0.157895	0.131579	0.131579	0.105263	0.105263	0.105263	0.157895	0.184211	0.210526	0.263158	0.184211	0.421053	0.00371753	0.00471138	0.0059344	0.00726732	0.00640407	0.00624064	0.00603595	0.00602756	0.00642322	0.00426623	0.00498583	0.00585342	0.00620504	0.00438819
40	Beta-2-glycoprotein 1 OS=Homo sapiens GN=APOH PE=1 SV=3	APOH_HUMAN	38	8.03	Homo sapiens	5	6	6	6	5	4	5	6	3	7	10	8	32	28	24	0.131579	0.157895	0.157895	0.157895	0.131579	0.105263	0.131579	0.157895	0.0789474	0.184211	0.263158	0.210526	0.842105	0.736842	0.631579	0.00619588	0.00706707	0.00712128	0.00726732	0.00640407	0.00499251	0.00754493	0.00904133	0.00481742	0.00497727	0.00712261	0.00585342	0.0198561	0.0175528
41	Apolipoprotein E OS=Homo sapiens GN=APOE PE=1 SV=1	APOE_HUMAN	36	5.42	Homo sapiens	5	5	5	0	0	0	3	2	2	4	0	0	6	6	8	0.138889	0.138889	0.138889	0	0	0	0.0833333	0.0555556	0.0555556	0.111111	0	0	0.166667	0.166667	0.222222	0.00654009	0.0062164	0.00626409	0	0	0	0.00477846	0.00318121	0.00339003	0.00300216	0	0	0.00392986	0.00397027
42	Serum paraoxonase/arylesterase 1 OS=Homo sapiens GN=PON1 PE=1 SV=3	PON1_HUMAN	40	4.89	Homo sapiens	0	0	0	0	0	0	0	0	0	2	0	0	2	2	0	0	0	0	0	0	0	0	0	0	0.05	0	0	0.05	0.05	0	0	0	0	0	0	0	0	0	0	0.00135097	0	0	0.00117896	0.00119108
43	Vitamin K-dependent protein S OS=Homo sapiens GN=PROS1 PE=1 SV=1	PROS_HUMAN	75	5.37	Homo sapiens	0	0	0	0	0	0	0	0	0	0	0	0	0	0	0	0	0	0	0	0	0	0	0	0	0	0	0	0	0	0	0	0	0	0	0	0	0	0	0	0	0	0	0	0
44	Keratin, type II cytoskeletal 5 OS=Homo sapiens GN=KRT5 PE=1 SV=3	K2C5_HUMAN	62	7.91	Homo sapiens	12	14	15	13	13	11	15	10	15	13	17	14	20	21	20	0.193548	0.225806	0.241935	0.209677	0.209677	0.177419	0.241935	0.16129	0.241935	0.209677	0.274194	0.225806	0.322581	0.33871	0.322581	0.00911393	0.0101067	0.0109116	0.00965068	0.0102052	0.0084148	0.0138729	0.00923577	0.014763	0.00566538	0.0074213	0.00627827	0.00760618	0.00806861
45	Keratin, type I cytoskeletal 14 OS=Homo sapiens GN=KRT14 PE=1 SV=4	K1C14_HUMAN	52	4.81	Homo sapiens	13	14	11	16	15	15	16	20	19	22	19	21	22	20	21	0.25	0.269231	0.211538	0.307692	0.288462	0.288462	0.307692	0.384615	0.365385	0.423077	0.365385	0.403846	0.423077	0.384615	0.403846	0.0117722	0.0120503	0.00954068	0.014162	0.0140397	0.0136814	0.0176435	0.0220238	0.022296	0.0114313	0.00988947	0.0112284	0.00997579	0.00916216
46	Ceruloplasmin OS=Homo sapiens GN=CP PE=1 SV=1	CERU_HUMAN	122	5.5	Homo sapiens	0	0	0	0	0	0	0	0	0	0	0	0	2	0	0	0	0	0	0	0	0	0	0	0	0	0	0	0.0163934	0	0	0	0	0	0	0	0	0	0	0	0	0	0	0.000386543	0
47	Complement C5 OS=Homo sapiens GN=C5 PE=1 SV=4	CO5_HUMAN	188	6.49	Homo sapiens	0	0	0	0	2	0	0	0	0	2	2	0	4	4	2	0	0	0	0	0.0106383	0	0	0	0	0.0106383	0.0106383	0	0.0212766	0.0212766	0.0106383	0	0	0	0	0.000517776	0	0	0	0	0.000287441	0.000287935	0	0.000501684	0.000506843
48	Fibronectin OS=Homo sapiens GN=FN1 PE=1 SV=4	FINC_HUMAN	263	5.45	Homo sapiens	2	0	0	2	2	2	0	0	0	8	10	8	8	8	10	0.00760456	0	0	0.00760456	0.00760456	0.00760456	0	0	0	0.0304183	0.0380228	0.0304183	0.0304183	0.0304183	0.0380228	0.000358089	0	0	0.00035001	0.000370121	0.000360676	0	0	0	0.000821885	0.00102912	0.000845742	0.000717236	0.000724612
49	Clusterin OS=Homo sapiens GN=CLU PE=1 SV=1	CLUS_HUMAN	52	6.21	Homo sapiens	0	0	0	0	0	0	0	0	0	0	0	0	0	0	0	0	0	0	0	0	0	0	0	0	0	0	0	0	0	0	0	0	0	0	0	0	0	0	0	0	0	0	0	0
50	Ig kappa chain V-III region HAH OS=Homo sapiens PE=2 SV=1	KV312_HUMAN	14	4.59	Homo sapiens	0	0	3	2	3	2	2	0	0	9	11	9	6	5	11	0	0	0.214286	0.142857	0.214286	0.142857	0.142857	0	0	0.642857	0.785714	0.642857	0.428571	0.357143	0.785714	0	0	0.00966459	0.00657519	0.0104295	0.00677556	0.00819164	0	0	0.0173697	0.0212661	0.0178739	0.0101053	0.00850772
51	Complement C1q subcomponent subunit C OS=Homo sapiens GN=C1QC PE=1 SV=3	C1QC_HUMAN	26	8.58	Homo sapiens	3	3	3	5	6	5	5	5	4	8	7	8	9	6	6	0.115385	0.115385	0.115385	0.192308	0.230769	0.192308	0.192308	0.192308	0.153846	0.307692	0.269231	0.307692	0.346154	0.230769	0.230769	0.00543331	0.00516439	0.00520401	0.00885122	0.0112317	0.00912094	0.0110272	0.0110119	0.00938778	0.00831369	0.00728698	0.00855501	0.00816201	0.0054973
52	Apolipoprotein C-III OS=Homo sapiens GN=APOC3 PE=1 SV=1	APOC3_HUMAN	11	5.04	Homo sapiens	3	3	2	0	0	2	3	3	2	0	2	3	3	3	3	0.272727	0.272727	0.181818	0	0	0.181818	0.272727	0.272727	0.181818	0	0.181818	0.272727	0.272727	0.272727	0.272727	0.0128424	0.0122067	0.00820026	0	0	0.00862343	0.0156386	0.0156168	0.0110947	0	0.00492108	0.00758285	0.00643068	0.0064968
53	Immunoglobulin J chain OS=Homo sapiens GN=IGJ PE=1 SV=4	IGJ_HUMAN	18	4.87	Homo sapiens	5	5	6	4	5	3	3	5	3	6	7	5	5	6	4	0.277778	0.277778	0.333333	0.222222	0.277778	0.166667	0.166667	0.277778	0.166667	0.333333	0.388889	0.277778	0.277778	0.333333	0.222222	0.0130802	0.0124328	0.0150338	0.0102281	0.0135197	0.00790482	0.00955691	0.015906	0.0101701	0.00900649	0.0105256	0.00772327	0.00654976	0.00794054
54	Coagulation factor V OS=Homo sapiens GN=F5 PE=1 SV=4	FA5_HUMAN	252	5.95	Homo sapiens	4	5	5	0	0	2	0	0	0	4	5	5	7	7	6	0.015873	0.0198413	0.0198413	0	0	0.00793651	0	0	0	0.015873	0.0198413	0.0198413	0.0277778	0.0277778	0.0238095	0.000747439	0.000888057	0.000894869	0	0	0.00037642	0	0	0	0.000428881	0.000537022	0.000551662	0.000654976	0.000661711
55	Actin, cytoplasmic 2 OS=Homo sapiens GN=ACTG1 PE=1 SV=1	ACTG_HUMAN	42	5.16	Homo sapiens	7	8	7	2	2	2	0	0	0	4	8	6	6	7	2	0.166667	0.190476	0.166667	0.047619	0.047619	0.047619	0	0	0	0.0952381	0.190476	0.142857	0.142857	0.166667	0.047619	0.00784811	0.00852535	0.0075169	0.00219173	0.00231766	0.00225852	0	0	0	0.00257328	0.00515541	0.00397197	0.00336845	0.00397027
56	Ig gamma-3 chain C region OS=Homo sapiens GN=IGHG3 PE=1 SV=2	IGHG3_HUMAN	41	7.95	Homo sapiens	38	38	42	53	47	45	32	38	36	50	54	43	62	58	63	0.926829	0.926829	1.02439	1.29268	1.14634	1.09756	0.780488	0.926829	0.878049	1.21951	1.31707	1.04878	1.5122	1.41463	1.53659	0.0436431	0.0414831	0.0462014	0.0594975	0.0557935	0.0520561	0.0447543	0.0530719	0.0535791	0.0329506	0.0356478	0.0291601	0.0356563	0.0336989
57	Inter-alpha-trypsin inhibitor heavy chain H3 OS=Homo sapiens GN=ITIH3 PE=1 SV=2	ITIH3_HUMAN	100	5.49	Homo sapiens	0	0	0	0	0	0	0	0	0	0	0	0	0	0	0	0	0	0	0	0	0	0	0	0	0	0	0	0	0	0	0	0	0	0	0	0	0	0	0	0	0	0	0	0
58	Ig heavy chain V-III region TRO OS=Homo sapiens PE=1 SV=1	HV301_HUMAN	13	10	Homo sapiens	3	3	0	0	0	0	0	0	0	10	0	7	6	4	7	0.230769	0.230769	0	0	0	0	0	0	0	0.769231	0	0.538462	0.461538	0.307692	0.538462	0.0108666	0.0103288	0	0	0	0	0	0	0	0.0207842	0	0.0149713	0.0108827	0.00732973
59	Alpha-1-antitrypsin OS=Homo sapiens GN=SERPINA1 PE=1 SV=3	A1AT_HUMAN	47	5.31	Homo sapiens	0	0	0	0	0	0	0	0	0	2	0	3	5	6	4	0	0	0	0	0	0	0	0	0	0.0425532	0	0.0638298	0.106383	0.12766	0.0851064	0	0	0	0	0	0	0	0	0	0.00114977	0	0.00177471	0.00250842	0.00304106
60	Histidine-rich glycoprotein OS=Homo sapiens GN=HRG PE=1 SV=1	HRG_HUMAN	60	7.52	Homo sapiens	2	3	2	3	2	0	0	0	0	0	0	0	6	7	4	0.0333333	0.05	0.0333333	0.05	0.0333333	0	0	0	0	0	0	0	0.1	0.116667	0.0666667	0.00156962	0.0022379	0.00150338	0.00230132	0.00162236	0	0	0	0	0	0	0	0.00235791	0.00277919
61	Ig heavy chain V-III region TUR OS=Homo sapiens PE=1 SV=1	HV318_HUMAN	12	10.12	Homo sapiens	0	0	0	0	0	0	0	0	0	7	5	6	5	5	0	0	0	0	0	0	0	0	0	0	0.583333	0.416667	0.5	0.416667	0.416667	0	0	0	0	0	0	0	0	0	0	0.0157614	0.0112775	0.0139019	0.00982464	0.00992567
62	Protein AMBP OS=Homo sapiens GN=AMBP PE=1 SV=1	AMBP_HUMAN	39	6.15	Homo sapiens	0	0	0	0	0	0	0	0	0	0	0	0	0	0	0	0	0	0	0	0	0	0	0	0	0	0	0	0	0	0	0	0	0	0	0	0	0	0	0	0	0	0	0	0
63	Cartilage oligomeric matrix protein OS=Homo sapiens GN=COMP PE=1 SV=2	COMP_HUMAN	83	4.16	Homo sapiens	0	0	0	0	0	0	0	0	0	0	0	0	0	0	0	0	0	0	0	0	0	0	0	0	0	0	0	0	0	0	0	0	0	0	0	0	0	0	0	0	0	0	0	0
64	Complement C1s subcomponent OS=Homo sapiens GN=C1S PE=1 SV=1	C1S_HUMAN	77	4.59	Homo sapiens	0	0	0	0	0	0	0	0	0	0	0	0	0	0	0	0	0	0	0	0	0	0	0	0	0	0	0	0	0	0	0	0	0	0	0	0	0	0	0	0	0	0	0	0
65	Coagulation factor IX OS=Homo sapiens GN=F9 PE=1 SV=2	FA9_HUMAN	52	5.16	Homo sapiens	0	0	0	0	0	0	0	0	0	0	0	0	0	0	0	0	0	0	0	0	0	0	0	0	0	0	0	0	0	0	0	0	0	0	0	0	0	0	0	0	0	0	0	0
66	Apolipoprotein A-IV OS=Homo sapiens GN=APOA4 PE=1 SV=3	APOA4_HUMAN	45	5.05	Homo sapiens	0	0	0	0	0	0	0	0	0	0	0	0	0	0	0	0	0	0	0	0	0	0	0	0	0	0	0	0	0	0	0	0	0	0	0	0	0	0	0	0	0	0	0	0
67	Platelet factor 4 OS=Homo sapiens GN=PF4 PE=1 SV=2	PLF4_HUMAN	11	8.78	Homo sapiens	0	2	3	0	0	0	0	3	0	5	6	4	3	4	3	0	0.181818	0.272727	0	0	0	0	0.272727	0	0.454545	0.545455	0.363636	0.272727	0.363636	0.272727	0	0.00813783	0.0123004	0	0	0	0	0.0156168	0	0.0122816	0.0147632	0.0101105	0.00643068	0.0086624
68	Myosin-9 OS=Homo sapiens GN=MYH9 PE=1 SV=4	MYH9_HUMAN	227	5.29	Homo sapiens	0	0	0	0	0	0	0	0	0	0	0	0	2	0	0	0	0	0	0	0	0	0	0	0	0	0	0	0.00881057	0	0	0	0	0	0	0	0	0	0	0	0	0	0	0.000207746	0
69	Ficolin-3 OS=Homo sapiens GN=FCN3 PE=1 SV=2	FCN3_HUMAN	33	6.66	unknown	0	0	0	2	2	0	0	0	0	2	2	3	3	3	2	0	0	0	0.0606061	0.0606061	0	0	0	0	0.0606061	0.0606061	0.0909091	0.0909091	0.0909091	0.0606061	0	0	0	0.00278948	0.00294975	0	0	0	0	0.00163754	0.00164036	0.00252762	0.00214356	0.0021656
70	Platelet glycoprotein 4 OS=Homo sapiens GN=CD36 PE=1 SV=2	CD36_HUMAN	53	8.06	Homo sapiens	2	0	3	0	0	0	2	2	2	6	5	6	9	11	11	0.0377358	0	0.0566038	0	0	0	0.0377358	0.0377358	0.0377358	0.113208	0.0943396	0.113208	0.169811	0.207547	0.207547	0.00177693	0	0.00255291	0	0	0	0.00216383	0.00216082	0.00230266	0.00305881	0.00255339	0.0031476	0.00400401	0.00494411
71	C4b-binding protein beta chain OS=Homo sapiens GN=C4BPB PE=1 SV=1	C4BPB_HUMAN	28	4.8	Homo sapiens	0	0	0	0	2	2	0	0	0	0	0	0	0	0	0	0	0	0	0	0.0714286	0.0714286	0	0	0	0	0	0	0	0	0	0	0	0	0	0.00347649	0.00338778	0	0	0	0	0	0	0	0
72	Properdin OS=Homo sapiens GN=CFP PE=1 SV=2	PROP_HUMAN	51	7.92	Homo sapiens	0	2	0	3	3	2	0	0	0	6	9	7	3	4	6	0	0.0392157	0	0.0588235	0.0588235	0.0392157	0	0	0	0.117647	0.176471	0.137255	0.0588235	0.0784314	0.117647	0	0.00175522	0	0.00270743	0.00286299	0.00185996	0	0	0	0.00317876	0.00477634	0.0038162	0.00138701	0.00186836
73	Kininogen-1 OS=Homo sapiens GN=KNG1 PE=1 SV=2	KNG1_HUMAN	72	6.8	Homo sapiens	0	0	0	0	0	0	0	0	0	0	0	0	0	0	0	0	0	0	0	0	0	0	0	0	0	0	0	0	0	0	0	0	0	0	0	0	0	0	0	0	0	0	0	0
74	Ig heavy chain V-III region GAL OS=Homo sapiens PE=1 SV=1	HV320_HUMAN	13	8.7	Homo sapiens	3	2	3	2	3	2	2	2	2	6	6	6	3	4	3	0.230769	0.153846	0.230769	0.153846	0.230769	0.153846	0.153846	0.153846	0.153846	0.461538	0.461538	0.461538	0.230769	0.307692	0.230769	0.0108666	0.00688586	0.010408	0.00708098	0.0112317	0.00729675	0.00882177	0.0088095	0.00938778	0.0124705	0.012492	0.0128325	0.00544134	0.00732973
75	Erythrocyte band 7 integral membrane protein OS=Homo sapiens GN=STOM PE=1 SV=3	STOM_HUMAN	32	8.07	Homo sapiens	3	2	2	2	2	2	3	2	0	7	6	9	8	7	9	0.09375	0.0625	0.0625	0.0625	0.0625	0.0625	0.09375	0.0625	0	0.21875	0.1875	0.28125	0.25	0.21875	0.28125	0.00441456	0.00279738	0.00281884	0.00287665	0.00304193	0.00296431	0.00537576	0.00357886	0	0.00591051	0.00507486	0.00781981	0.00589479	0.00521098
76	Ig kappa chain V-I region EU OS=Homo sapiens PE=1 SV=1	KV106_HUMAN	12	8.46	unknown	2	2	2	4	4	4	2	2	2	0	7	5	6	7	8	0.166667	0.166667	0.166667	0.333333	0.333333	0.333333	0.166667	0.166667	0.166667	0	0.583333	0.416667	0.5	0.583333	0.666667	0.00784811	0.00745968	0.0075169	0.0153421	0.0162236	0.0158096	0.00955691	0.00954363	0.0101701	0	0.0157885	0.0115849	0.0117896	0.0138959
77	Ig heavy chain V-III region 23 OS=Homo sapiens GN=IGHV3-23 PE=1 SV=2	HV303_HUMAN	13	8.46	Homo sapiens	0	4	5	6	3	6	3	4	2	11	9	8	8	6	5	0	0.307692	0.384615	0.461538	0.230769	0.461538	0.230769	0.307692	0.153846	0.846154	0.692308	0.615385	0.615385	0.461538	0.384615	0	0.0137717	0.0173467	0.0212429	0.0112317	0.0218903	0.0132326	0.017619	0.00938778	0.0228626	0.0187379	0.01711	0.0145102	0.0109946
78	Tropomyosin alpha-4 chain OS=Homo sapiens GN=TPM4 PE=1 SV=3	TPM4_HUMAN	29	4.36	Homo sapiens	0	0	0	0	0	0	0	0	0	0	0	0	0	0	0	0	0	0	0	0	0	0	0	0	0	0	0	0	0	0	0	0	0	0	0	0	0	0	0	0	0	0	0	0
79	Complement component C9 OS=Homo sapiens GN=C9 PE=1 SV=2	CO9_HUMAN	63	5.27	Homo sapiens	0	0	0	0	0	0	0	0	0	0	0	0	0	0	0	0	0	0	0	0	0	0	0	0	0	0	0	0	0	0	0	0	0	0	0	0	0	0	0	0	0	0	0	0
80	Keratin, type I cytoskeletal 17 OS=Homo sapiens GN=KRT17 PE=1 SV=2	K1C17_HUMAN	48	4.67	Homo sapiens	9	10	8	11	9	9	8	11	9	13	11	12	14	13	13	0.1875	0.208333	0.166667	0.229167	0.1875	0.1875	0.166667	0.229167	0.1875	0.270833	0.229167	0.25	0.291667	0.270833	0.270833	0.00882912	0.0093246	0.0075169	0.0105477	0.0091258	0.00889292	0.00955691	0.0131225	0.0114414	0.00731778	0.00620261	0.00695094	0.00687725	0.00645169
81	Complement C1q subcomponent subunit B OS=Homo sapiens GN=C1QB PE=1 SV=3	C1QB_HUMAN	27	8.87	Homo sapiens	2	3	3	5	3	3	0	3	0	6	7	4	4	4	5	0.0740741	0.111111	0.111111	0.185185	0.111111	0.111111	0	0.111111	0	0.222222	0.259259	0.148148	0.148148	0.148148	0.185185	0.00348805	0.00497312	0.00501127	0.0085234	0.00540788	0.00526988	0	0.00636242	0	0.00600433	0.00701709	0.00411908	0.00349321	0.00352913
82	Apolipoprotein M OS=Homo sapiens GN=APOM PE=1 SV=2	APOM_HUMAN	21	5.92	Homo sapiens	0	2	0	0	0	0	0	0	0	0	0	0	0	0	3	0	0.0952381	0	0	0	0	0	0	0	0	0	0	0	0	0.142857	0	0.00426267	0	0	0	0	0	0	0	0	0	0	0	0
83	Heparin cofactor 2 OS=Homo sapiens GN=SERPIND1 PE=1 SV=3	HEP2_HUMAN	57	6.89	Homo sapiens	0	0	0	0	0	0	0	0	0	0	0	0	0	0	0	0	0	0	0	0	0	0	0	0	0	0	0	0	0	0	0	0	0	0	0	0	0	0	0	0	0	0	0	0
84	Haptoglobin-related protein OS=Homo sapiens GN=HPR PE=2 SV=2	HPTR_HUMAN	39	7.11	Homo sapiens	7	7	7	5	4	4	0	0	0	10	10	8	10	8	14	0.179487	0.179487	0.179487	0.128205	0.102564	0.102564	0	0	0	0.25641	0.25641	0.205128	0.25641	0.205128	0.358974	0.00845181	0.0080335	0.00809513	0.00590081	0.00499189	0.0048645	0	0	0	0.00692807	0.00693998	0.00570334	0.00604593	0.00488648
85	Integrin alpha-IIb OS=Homo sapiens GN=ITGA2B PE=1 SV=3	ITA2B_HUMAN	113	5.03	Homo sapiens	0	0	0	0	0	0	0	0	0	5	6	4	9	12	10	0	0	0	0	0	0	0	0	0	0.0442478	0.0530973	0.0353982	0.079646	0.106195	0.0884956	0	0	0	0	0	0	0	0	0	0.00119555	0.00143713	0.000984204	0.00187798	0.00252973
86	Integrin beta-1 OS=Homo sapiens GN=ITGB1 PE=1 SV=2	ITB1_HUMAN	88	5.04	Homo sapiens	3	2	0	0	0	0	3	2	2	2	2	2	10	11	7	0.0340909	0.0227273	0	0	0	0	0.0340909	0.0227273	0.0227273	0.0227273	0.0227273	0.0227273	0.113636	0.125	0.0795455	0.0016053	0.00101723	0	0	0	0	0.00195482	0.0013014	0.00138683	0.000614079	0.000615135	0.000631904	0.00267945	0.0029777
87	Desmoplakin OS=Homo sapiens GN=DSP PE=1 SV=3	DESP_HUMAN	332	6.78	Homo sapiens	2	0	0	0	0	0	3	0	2	4	6	5	3	2	3	0.0060241	0	0	0	0	0	0.00903614	0	0.0060241	0.0120482	0.0180723	0.0150602	0.00903614	0.0060241	0.00903614	0.000283667	0	0	0	0	0	0.000518146	0	0.000367594	0.000325536	0.000489143	0.000418731	0.000213065	0.000143504
88	Apolipoprotein C-II OS=Homo sapiens GN=APOC2 PE=1 SV=1	APOC2_HUMAN	11	4.36	Homo sapiens	2	3	0	0	0	0	2	2	2	0	0	0	3	4	2	0.181818	0.272727	0	0	0	0	0.181818	0.181818	0.181818	0	0	0	0.272727	0.363636	0.181818	0.00856157	0.0122067	0	0	0	0	0.0104257	0.0104112	0.0110947	0	0	0	0.00643068	0.0086624
89	Ig kappa chain V-II region RPMI 6410 OS=Homo sapiens PE=4 SV=1	KV206_HUMAN	15	9.53	Homo sapiens	0	0	0	4	0	0	2	3	0	3	4	4	0	3	0	0	0	0	0.266667	0	0	0.133333	0.2	0	0.2	0.266667	0.266667	0	0.2	0	0	0	0	0.0122737	0	0	0.00764553	0.0114524	0	0.0054039	0.00721758	0.00741434	0	0.00476432
90	HLA class I histocompatibility antigen, B-7 alpha chain OS=Homo sapiens GN=HLA-B PE=1 SV=3	1B07_HUMAN	40	5.65	unknown	2	2	3	0	3	2	2	2	2	3	0	2	10	11	10	0.05	0.05	0.075	0	0.075	0.05	0.05	0.05	0.05	0.075	0	0.05	0.25	0.275	0.25	0.00235443	0.0022379	0.00338261	0	0.00365032	0.00237144	0.00286707	0.00286309	0.00305103	0.00202646	0	0.00139019	0.00589479	0.00655094
91	Coagulation factor X OS=Homo sapiens GN=F10 PE=1 SV=2	FA10_HUMAN	55	5.74	Homo sapiens	0	0	0	0	0	0	0	0	0	0	0	0	0	0	0	0	0	0	0	0	0	0	0	0	0	0	0	0	0	0	0	0	0	0	0	0	0	0	0	0	0	0	0	0
92	C-reactive protein OS=Homo sapiens GN=CRP PE=1 SV=1	CRP_HUMAN	25	5.32	Homo sapiens	0	0	0	0	0	0	0	0	0	0	0	0	0	0	0	0	0	0	0	0	0	0	0	0	0	0	0	0	0	0	0	0	0	0	0	0	0	0	0	0	0	0	0	0
93	Alpha-1-antichymotrypsin OS=Homo sapiens GN=SERPINA3 PE=1 SV=2	AACT_HUMAN	48	5.19	Homo sapiens	0	0	0	0	0	0	0	0	0	0	0	0	0	0	0	0	0	0	0	0	0	0	0	0	0	0	0	0	0	0	0	0	0	0	0	0	0	0	0	0	0	0	0	0
94	Ig kappa chain V-IV region (Fragment) OS=Homo sapiens GN=IGKV4-1 PE=4 SV=1	KV401_HUMAN	13	4.85	Homo sapiens	3	2	3	3	3	3	0	0	0	3	3	2	2	3	4	0.230769	0.153846	0.230769	0.230769	0.230769	0.230769	0	0	0	0.230769	0.230769	0.153846	0.153846	0.230769	0.307692	0.0108666	0.00688586	0.010408	0.0106215	0.0112317	0.0109451	0	0	0	0.00623526	0.00624598	0.0042775	0.00362756	0.0054973
95	Dermcidin OS=Homo sapiens GN=DCD PE=1 SV=2	DCD_HUMAN	11	6.52	Homo sapiens	4	4	4	3	3	4	2	3	3	2	5	3	2	2	2	0.363636	0.363636	0.363636	0.272727	0.272727	0.363636	0.181818	0.272727	0.272727	0.181818	0.454545	0.272727	0.181818	0.181818	0.181818	0.0171231	0.0162757	0.0164005	0.0125526	0.0132739	0.0172469	0.0104257	0.0156168	0.016642	0.00491263	0.0123027	0.00758285	0.00428712	0.0043312
96	Complement C1r subcomponent OS=Homo sapiens GN=C1R PE=1 SV=2	C1R_HUMAN	80	6.14	Homo sapiens	0	0	0	0	0	0	0	0	0	0	0	0	2	5	3	0	0	0	0	0	0	0	0	0	0	0	0	0.025	0.0625	0.0375	0	0	0	0	0	0	0	0	0	0	0	0	0.000589479	0.00148885
97	Vitamin K-dependent protein C OS=Homo sapiens GN=PROC PE=1 SV=1	PROC_HUMAN	52	6.23	Homo sapiens	0	0	0	0	0	0	0	0	0	0	0	0	0	0	0	0	0	0	0	0	0	0	0	0	0	0	0	0	0	0	0	0	0	0	0	0	0	0	0	0	0	0	0	0
98	Ig heavy chain V-II region ARH-77 OS=Homo sapiens PE=4 SV=1	HV209_HUMAN	16	8.45	Homo sapiens	2	2	2	2	2	2	0	0	0	4	3	3	5	0	3	0.125	0.125	0.125	0.125	0.125	0.125	0	0	0	0.25	0.1875	0.1875	0.3125	0	0.1875	0.00588608	0.00559476	0.00563768	0.00575329	0.00608386	0.00592861	0	0	0	0.00675487	0.00507486	0.00521321	0.00736848	0
99	Complement C1q subcomponent subunit A OS=Homo sapiens GN=C1QA PE=1 SV=2	C1QA_HUMAN	26	9.45	Homo sapiens	2	2	2	3	3	4	3	3	2	0	2	2	3	3	2	0.0769231	0.0769231	0.0769231	0.115385	0.115385	0.153846	0.115385	0.115385	0.0769231	0	0.0769231	0.0769231	0.115385	0.115385	0.0769231	0.0036222	0.00344293	0.00346934	0.00531073	0.00561587	0.00729675	0.00661632	0.00660713	0.00469389	0	0.00208199	0.00213875	0.00272067	0.00274865
100	Ig heavy chain V-I region HG3 OS=Homo sapiens PE=3 SV=1	HV102_HUMAN	13	9.4	Homo sapiens	3	3	3	0	0	0	0	0	0	3	4	5	0	0	0	0.230769	0.230769	0.230769	0	0	0	0	0	0	0.230769	0.307692	0.384615	0	0	0	0.0108666	0.0103288	0.010408	0	0	0	0	0	0	0.00623526	0.00832798	0.0106938	0	0
101	Ig alpha-2 chain C region OS=Homo sapiens GN=IGHA2 PE=1 SV=3	IGHA2_HUMAN	37	6.02	Homo sapiens	0	0	0	0	0	0	0	4	0	7	9	9	0	0	0	0	0	0	0	0	0	0	0.108108	0	0.189189	0.243243	0.243243	0	0	0	0	0	0	0	0	0	0	0.00619046	0	0.00511179	0.0065836	0.00676308	0	0
102	Thrombospondin-4 OS=Homo sapiens GN=THBS4 PE=1 SV=2	TSP4_HUMAN	106	4.23	Homo sapiens	0	0	0	0	0	0	0	0	0	0	0	0	0	0	0	0	0	0	0	0	0	0	0	0	0	0	0	0	0	0	0	0	0	0	0	0	0	0	0	0	0	0	0	0
103	Protein Z-dependent protease inhibitor OS=Homo sapiens GN=SERPINA10 PE=1 SV=1	ZPI_HUMAN	51	8.58	Homo sapiens	0	0	0	0	0	0	0	0	0	0	0	0	0	0	0	0	0	0	0	0	0	0	0	0	0	0	0	0	0	0	0	0	0	0	0	0	0	0	0	0	0	0	0	0
104	Complement factor H-related protein 1 OS=Homo sapiens GN=CFHR1 PE=1 SV=2	FHR1_HUMAN	38	7.42	Homo sapiens	2	3	3	4	4	3	0	0	0	0	0	0	4	0	4	0.0526316	0.0789474	0.0789474	0.105263	0.105263	0.0789474	0	0	0	0	0	0	0.105263	0	0.105263	0.00247835	0.00353353	0.00356064	0.00484488	0.00512325	0.00374439	0	0	0	0	0	0	0.00248202	0
105	Ig kappa chain V-III region VG (Fragment) OS=Homo sapiens PE=1 SV=1	KV309_HUMAN	13	4.59	Homo sapiens	0	0	0	0	0	0	0	0	0	0	3	0	0	0	0	0	0	0	0	0	0	0	0	0	0	0.230769	0	0	0	0	0	0	0	0	0	0	0	0	0	0	0.00624598	0	0	0
106	Transthyretin OS=Homo sapiens GN=TTR PE=1 SV=1	TTHY_HUMAN	16	5.58	Homo sapiens	0	0	0	0	0	0	0	0	0	0	0	0	0	0	0	0	0	0	0	0	0	0	0	0	0	0	0	0	0	0	0	0	0	0	0	0	0	0	0	0	0	0	0	0
107	Complement component C8 alpha chain OS=Homo sapiens GN=C8A PE=1 SV=2	CO8A_HUMAN	65	6.41	Homo sapiens	0	0	0	0	0	0	0	0	0	0	0	0	2	0	2	0	0	0	0	0	0	0	0	0	0	0	0	0.0307692	0	0.0307692	0	0	0	0	0	0	0	0	0	0	0	0	0.000725512	0
108	Vitamin D-binding protein OS=Homo sapiens GN=GC PE=1 SV=1	VTDB_HUMAN	53	5.21	Homo sapiens	0	0	0	0	0	0	0	0	0	0	0	0	4	5	5	0	0	0	0	0	0	0	0	0	0	0	0	0.0754717	0.0943396	0.0943396	0	0	0	0	0	0	0	0	0	0	0	0	0.00177956	0.00224732
109	Serum amyloid P-component OS=Homo sapiens GN=APCS PE=1 SV=2	SAMP_HUMAN	25	6.52	Homo sapiens	0	0	0	3	2	0	2	3	0	0	0	0	0	0	0	0	0	0	0.12	0.08	0	0.08	0.12	0	0	0	0	0	0	0	0	0	0	0.00552316	0.00389367	0	0.00458732	0.00687141	0	0	0	0	0	0
110	Platelet glycoprotein IX OS=Homo sapiens GN=GP9 PE=1 SV=3	GPIX_HUMAN	19	6.32	Homo sapiens	3	3	3	3	2	3	2	2	2	5	5	3	5	6	6	0.157895	0.157895	0.157895	0.157895	0.105263	0.157895	0.105263	0.105263	0.105263	0.263158	0.263158	0.157895	0.263158	0.315789	0.315789	0.00743505	0.00706707	0.00712128	0.00726732	0.00512325	0.00748877	0.00603595	0.00602756	0.00642322	0.00711039	0.00712261	0.00439007	0.00620504	0.00752261
111	Ig kappa chain V-III region CLL OS=Homo sapiens PE=4 SV=2	KV308_HUMAN	14	8.7	unknown	0	0	2	2	2	0	0	0	0	2	3	3	6	3	3	0	0	0.142857	0.142857	0.142857	0	0	0	0	0.142857	0.214286	0.214286	0.428571	0.214286	0.214286	0	0	0.00644306	0.00657519	0.00695299	0	0	0	0	0.00385993	0.00579984	0.00595795	0.0101053	0.00510463
112	Ig heavy chain V-III region WEA OS=Homo sapiens PE=1 SV=1	HV302_HUMAN	12	8.7	Homo sapiens	0	0	0	0	0	0	0	0	0	5	0	0	0	0	0	0	0	0	0	0	0	0	0	0	0.416667	0	0	0	0	0	0	0	0	0	0	0	0	0	0	0.0112581	0	0	0	0
113	Ig lambda chain V-III region LOI OS=Homo sapiens PE=1 SV=1	LV302_HUMAN	12	4.72	Homo sapiens	0	0	0	2	3	3	0	0	0	2	3	0	3	0	3	0	0	0	0.166667	0.25	0.25	0	0	0	0.166667	0.25	0	0.25	0	0.25	0	0	0	0.00767106	0.0121677	0.0118572	0	0	0	0.00450325	0.00676648	0	0.00589479	0
114	Phosphatidylcholine-sterol acyltransferase OS=Homo sapiens GN=LCAT PE=1 SV=1	LCAT_HUMAN	50	6.04	Homo sapiens	0	0	0	0	0	0	0	0	0	0	0	0	0	0	0	0	0	0	0	0	0	0	0	0	0	0	0	0	0	0	0	0	0	0	0	0	0	0	0	0	0	0	0	0
115	Ig heavy chain V-I region V35 OS=Homo sapiens PE=1 SV=1	HV103_HUMAN	13	9.87	Homo sapiens	0	0	0	0	0	0	0	0	0	4	4	5	0	0	0	0	0	0	0	0	0	0	0	0	0.307692	0.307692	0.384615	0	0	0	0	0	0	0	0	0	0	0	0	0.00831369	0.00832798	0.0106938	0	0
116	Ficolin-2 OS=Homo sapiens GN=FCN2 PE=1 SV=2	FCN2_HUMAN	34	6.77	unknown	2	0	0	0	0	0	0	0	0	0	3	2	2	2	4	0.0588235	0	0	0	0	0	0	0	0	0	0.0882353	0.0588235	0.0588235	0.0588235	0.117647	0.00276992	0	0	0	0	0	0	0	0	0	0.00238817	0.00163552	0.00138701	0.00140127
117	Hemoglobin subunit beta OS=Homo sapiens GN=HBB PE=1 SV=2	HBB_HUMAN	16	7.32	Homo sapiens	0	0	0	0	0	0	0	0	0	3	4	3	3	4	3	0	0	0	0	0	0	0	0	0	0.1875	0.25	0.1875	0.1875	0.25	0.1875	0	0	0	0	0	0	0	0	0	0.00506615	0.00676648	0.00521321	0.00442109	0.0059554
118	Ig heavy chain V-III region CAM OS=Homo sapiens PE=1 SV=1	HV307_HUMAN	14	6.5	unknown	0	0	0	0	0	0	0	0	0	0	0	0	0	0	0	0	0	0	0	0	0	0	0	0	0	0	0	0	0	0	0	0	0	0	0	0	0	0	0	0	0	0	0	0
119	Ig gamma-4 chain C region OS=Homo sapiens GN=IGHG4 PE=1 SV=1	IGHG4_HUMAN	36	7.41	Homo sapiens	0	0	0	0	0	0	0	0	0	32	0	28	0	0	0	0	0	0	0	0	0	0	0	0	0.888889	0	0.777778	0	0	0	0	0	0	0	0	0	0	0	0	0.0240173	0	0.0216252	0	0
120	Heat shock 70 kDa protein 1-like OS=Homo sapiens GN=HSPA1L PE=1 SV=2	HS71L_HUMAN	70	5.82	unknown	0	0	0	2	0	3	0	0	0	0	0	0	0	0	0	0	0	0	0.0285714	0	0.0428571	0	0	0	0	0	0	0	0	0	0	0	0	0.00131504	0	0.00203267	0	0	0	0	0	0	0	0
121	Lysozyme C OS=Homo sapiens GN=LYZ PE=1 SV=1	LYSC_HUMAN	17	9.35	Homo sapiens	2	3	2	0	2	2	0	0	0	0	2	2	0	0	0	0.117647	0.176471	0.117647	0	0.117647	0.117647	0	0	0	0	0.117647	0.117647	0	0	0	0.00553984	0.00789849	0.00530605	0	0.00572599	0.00557987	0	0	0	0	0.00318423	0.00327103	0	0
122	Ig lambda chain V-III region SH OS=Homo sapiens PE=1 SV=1	LV301_HUMAN	11	6.5	Homo sapiens	3	0	0	0	2	2	0	0	0	2	0	0	0	0	4	0.272727	0	0	0	0.181818	0.181818	0	0	0	0.181818	0	0	0	0	0.363636	0.0128424	0	0	0	0.00884926	0.00862343	0	0	0	0.00491263	0	0	0	0
123	Apolipoprotein A-II OS=Homo sapiens GN=APOA2 PE=1 SV=1	APOA2_HUMAN	11	6.6	Homo sapiens	2	0	0	0	0	0	0	0	0	0	0	0	2	3	0	0.181818	0	0	0	0	0	0	0	0	0	0	0	0.181818	0.272727	0	0.00856157	0	0	0	0	0	0	0	0	0	0	0	0.00428712	0.0064968
124	Ig lambda chain V-I region WAH OS=Homo sapiens PE=1 SV=1	LV106_HUMAN	12	6.46	unknown	0	0	0	2	2	0	0	0	0	0	2	2	0	0	2	0	0	0	0.166667	0.166667	0	0	0	0	0	0.166667	0.166667	0	0	0.166667	0	0	0	0.00767106	0.00811182	0	0	0	0	0	0.00451099	0.00463396	0	0
125	Ig heavy chain V-III region GA OS=Homo sapiens PE=1 SV=1	HV308_HUMAN	13	10.02	Homo sapiens	0	0	0	0	0	2	0	0	0	0	0	0	2	0	0	0	0	0	0	0	0.153846	0	0	0	0	0	0	0.153846	0	0	0	0	0	0	0	0.00729675	0	0	0	0	0	0	0.00362756	0
126	Complement component C8 beta chain OS=Homo sapiens GN=C8B PE=1 SV=3	CO8B_HUMAN	67	8.17	Homo sapiens	0	0	0	0	0	0	0	0	0	0	0	0	0	0	0	0	0	0	0	0	0	0	0	0	0	0	0	0	0	0	0	0	0	0	0	0	0	0	0	0	0	0	0	0
127	Small proline-rich protein 2A OS=Homo sapiens GN=SPRR2A PE=1 SV=1	SPR2A_HUMAN	8	8.49	unknown	4	0	0	0	0	0	3	4	3	2	0	2	0	0	4	0.5	0	0	0	0	0	0.375	0.5	0.375	0.25	0	0.25	0	0	0.5	0.0235443	0	0	0	0	0	0.0215031	0.0286309	0.0228827	0.00675487	0	0.00695094	0	0
128	Secreted phosphoprotein 24 OS=Homo sapiens GN=SPP2 PE=1 SV=1	SPP24_HUMAN	24	8.46	Homo sapiens	0	0	0	0	0	0	0	0	0	0	0	0	0	0	0	0	0	0	0	0	0	0	0	0	0	0	0	0	0	0	0	0	0	0	0	0	0	0	0	0	0	0	0	0
129	Filaggrin-2 OS=Homo sapiens GN=FLG2 PE=1 SV=1	FILA2_HUMAN	248	8.35	Homo sapiens	2	2	2	2	2	2	2	2	0	2	0	0	0	0	3	0.00806452	0.00806452	0.00806452	0.00806452	0.00806452	0.00806452	0.00806452	0.00806452	0	0.00806452	0	0	0	0	0.0120968	0.000379747	0.000360952	0.000363721	0.00037118	0.000392507	0.000382491	0.000462431	0.000461789	0	0.000217899	0	0	0	0
130	Apolipoprotein C-I OS=Homo sapiens GN=APOC1 PE=1 SV=1	APOC1_HUMAN	9	9.17	Homo sapiens	0	2	0	0	0	0	0	0	0	0	0	0	0	2	4	0	0.222222	0	0	0	0	0	0	0	0	0	0	0	0.222222	0.444444	0	0.00994624	0	0	0	0	0	0	0	0	0	0	0	0.00529369
131	Ig kappa chain V-III region B6 OS=Homo sapiens PE=1 SV=1	KV301_HUMAN	12	9.53	Homo sapiens	0	0	0	0	0	0	0	0	0	0	0	0	3	0	0	0	0	0	0	0	0	0	0	0	0	0	0	0.25	0	0	0	0	0	0	0	0	0	0	0	0	0	0	0.00589479	0
132	Complement component C8 gamma chain OS=Homo sapiens GN=C8G PE=1 SV=3	CO8G_HUMAN	22	8.48	Homo sapiens	0	0	0	0	0	0	0	0	0	0	0	0	0	0	0	0	0	0	0	0	0	0	0	0	0	0	0	0	0	0	0	0	0	0	0	0	0	0	0	0	0	0	0	0
133	Trypsin-1 OS=Homo sapiens GN=PRSS1 PE=1 SV=1	TRY1_HUMAN	27	6.49	unknown	0	3	3	0	0	0	0	0	0	0	0	0	2	2	2	0	0.111111	0.111111	0	0	0	0	0	0	0	0	0	0.0740741	0.0740741	0.0740741	0	0.00497312	0.00501127	0	0	0	0	0	0	0	0	0	0.0017466	0.00176456
134	Sorbin and SH3 domain-containing protein 2 OS=Homo sapiens GN=SORBS2 PE=1 SV=3	SRBS2_HUMAN	124	8.42	unknown	0	0	0	0	0	0	0	0	0	0	0	0	3	0	0	0	0	0	0	0	0	0	0	0	0	0	0	0.0241935	0	0	0	0	0	0	0	0	0	0	0	0	0	0	0.000570463	0
135	Keratin, type II cuticular Hb5 OS=Homo sapiens GN=KRT85 PE=1 SV=1	KRT85_HUMAN	56	6.49	unknown	0	0	0	8	5	8	0	0	0	0	0	0	0	0	0	0	0	0	0.142857	0.0892857	0.142857	0	0	0	0	0	0	0	0	0	0	0	0	0.00657519	0.00434562	0.00677556	0	0	0	0	0	0	0	0
136	Galectin-3-binding protein OS=Homo sapiens GN=LGALS3BP PE=1 SV=1	LG3BP_HUMAN	65	4.9	unknown	0	0	0	2	3	0	0	0	0	4	4	5	0	0	0	0	0	0	0.0307692	0.0461538	0	0	0	0	0.0615385	0.0615385	0.0769231	0	0	0	0	0	0	0.0014162	0.00224635	0	0	0	0	0.00166274	0.0016656	0.00213875	0	0
137	Alpha-1-acid glycoprotein 1 OS=Homo sapiens GN=ORM1 PE=1 SV=1	A1AG1_HUMAN	24	4.66	Homo sapiens	2	0	2	0	0	0	0	0	0	0	0	0	0	2	0	0.0833333	0	0.0833333	0	0	0	0	0	0	0	0	0	0	0.0833333	0	0.00392405	0	0.00375845	0	0	0	0	0	0	0	0	0	0	0.00198513
138	Vitamin K-dependent protein Z OS=Homo sapiens GN=PROZ PE=1 SV=2	PROZ_HUMAN	45	5.87	Homo sapiens	0	0	0	0	0	0	0	0	0	0	0	0	0	0	0	0	0	0	0	0	0	0	0	0	0	0	0	0	0	0	0	0	0	0	0	0	0	0	0	0	0	0	0	0
139	Solute carrier family 2, facilitated glucose transporter member 3 OS=Homo sapiens GN=SLC2A3 PE=2 SV=1	GTR3_HUMAN	54	7.24	Homo sapiens	0	0	0	0	0	0	2	2	3	2	2	2	4	5	3	0	0	0	0	0	0	0.037037	0.037037	0.0555556	0.037037	0.037037	0.037037	0.0740741	0.0925926	0.0555556	0	0	0	0	0	0	0.00212376	0.00212081	0.00339003	0.00100072	0.00100244	0.00102977	0.0017466	0.0022057
140	Desmocollin-1 OS=Homo sapiens GN=DSC1 PE=1 SV=2	DSC1_HUMAN	100	5.08	Homo sapiens	2	0	0	0	0	0	2	0	0	2	0	2	2	3	0	0.02	0	0	0	0	0	0.02	0	0	0.02	0	0.02	0.02	0.03	0	0.000941773	0	0	0	0	0	0.00114683	0	0	0.00054039	0	0.000556075	0.000471583	0.000714648
141	ATP synthase subunit beta, mitochondrial OS=Homo sapiens GN=ATP5B PE=1 SV=3	ATPB_HUMAN	57	5.07	Homo sapiens	0	0	0	0	0	0	0	0	0	2	2	0	5	0	3	0	0	0	0	0	0	0	0	0	0.0350877	0.0350877	0	0.0877193	0	0.0526316	0	0	0	0	0	0	0	0	0	0.000948052	0.000949682	0	0.00206835	0
142	Prenylcysteine oxidase 1 OS=Homo sapiens GN=PCYOX1 PE=1 SV=3	PCYOX_HUMAN	57	6.1	unknown	0	0	0	0	0	0	0	0	0	2	4	0	4	2	0	0	0	0	0	0	0	0	0	0	0.0350877	0.0701754	0	0.0701754	0.0350877	0	0	0	0	0	0	0	0	0	0	0.000948052	0.00189936	0	0.00165468	0.000835846
143	Phosphatidylinositol-glycan-specific phospholipase D OS=Homo sapiens GN=GPLD1 PE=1 SV=3	PHLD_HUMAN	92	6.33	unknown	0	0	0	0	0	0	0	0	0	0	0	0	0	0	0	0	0	0	0	0	0	0	0	0	0	0	0	0	0	0	0	0	0	0	0	0	0	0	0	0	0	0	0	0
144	Keratin, type II cytoskeletal 6C OS=Homo sapiens GN=KRT6C PE=1 SV=3	K2C6C_HUMAN	60	8.16	Homo sapiens	0	0	0	0	0	0	23	15	21	0	22	23	33	32	29	0	0	0	0	0	0	0.383333	0.25	0.35	0	0.366667	0.383333	0.55	0.533333	0.483333	0	0	0	0	0	0	0.0219809	0.0143154	0.0213572	0	0.00992417	0.0106581	0.0129685	0.0127049
145	Ig heavy chain V-III region BUT OS=Homo sapiens PE=1 SV=1	HV306_HUMAN	12	9.48	Homo sapiens	0	0	0	0	0	0	0	0	0	0	0	0	5	4	3	0	0	0	0	0	0	0	0	0	0	0	0	0.416667	0.333333	0.25	0	0	0	0	0	0	0	0	0	0	0	0	0.00982464	0.00794054
146	Hemopexin OS=Homo sapiens GN=HPX PE=1 SV=2	HEMO_HUMAN	52	7.02	Homo sapiens	0	0	0	0	0	0	0	0	0	0	0	0	0	0	0	0	0	0	0	0	0	0	0	0	0	0	0	0	0	0	0	0	0	0	0	0	0	0	0	0	0	0	0	0
147	Neutrophil defensin 1 OS=Homo sapiens GN=DEFA1 PE=1 SV=1	DEF1_HUMAN	10	7.04	Homo sapiens	0	0	0	0	0	0	0	0	0	0	2	0	2	0	2	0	0	0	0	0	0	0	0	0	0	0.2	0	0.2	0	0.2	0	0	0	0	0	0	0	0	0	0	0.00541319	0	0.00471583	0
148	Lipocalin-1 OS=Homo sapiens GN=LCN1 PE=1 SV=1	LCN1_HUMAN	19	5.3	unknown	3	4	2	0	0	0	0	0	0	0	2	2	0	0	0	0.157895	0.210526	0.105263	0	0	0	0	0	0	0	0.105263	0.105263	0	0	0	0.00743505	0.00942275	0.00474752	0	0	0	0	0	0	0	0.00284904	0.00292671	0	0
149	Alpha-2-HS-glycoprotein OS=Homo sapiens GN=AHSG PE=1 SV=1	FETUA_HUMAN	39	5.52	Homo sapiens	0	0	0	0	0	0	0	0	0	0	0	0	0	0	0	0	0	0	0	0	0	0	0	0	0	0	0	0	0	0	0	0	0	0	0	0	0	0	0	0	0	0	0	0
150	Mannan-binding lectin serine protease 1 OS=Homo sapiens GN=MASP1 PE=1 SV=3	MASP1_HUMAN	79	5.18	Homo sapiens	0	0	0	0	0	0	0	0	0	0	0	0	0	0	0	0	0	0	0	0	0	0	0	0	0	0	0	0	0	0	0	0	0	0	0	0	0	0	0	0	0	0	0	0
151	Ig kappa chain V-III region NG9 (Fragment) OS=Homo sapiens PE=2 SV=1	KV303_HUMAN	11	9.53	unknown	0	0	0	0	0	0	0	0	0	5	0	0	0	0	4	0	0	0	0	0	0	0	0	0	0.454545	0	0	0	0	0.363636	0	0	0	0	0	0	0	0	0	0.0122816	0	0	0	0
152	Hemoglobin subunit alpha OS=Homo sapiens GN=HBA1 PE=1 SV=2	HBA_HUMAN	15	9.09	Homo sapiens	0	0	0	0	0	0	0	0	0	0	0	3	0	4	2	0	0	0	0	0	0	0	0	0	0	0	0.2	0	0.266667	0.133333	0	0	0	0	0	0	0	0	0	0	0	0.00556075	0	0.00635243
153	14-3-3 protein zeta/delta OS=Homo sapiens GN=YWHAZ PE=1 SV=1	1433Z_HUMAN	28	4.43	Homo sapiens	0	0	0	0	0	0	0	0	0	0	0	0	0	0	0	0	0	0	0	0	0	0	0	0	0	0	0	0	0	0	0	0	0	0	0	0	0	0	0	0	0	0	0	0
154	Glyceraldehyde-3-phosphate dehydrogenase OS=Homo sapiens GN=GAPDH PE=1 SV=3	G3P_HUMAN	36	8.73	Homo sapiens	0	0	0	0	0	0	0	0	0	2	2	0	2	0	0	0	0	0	0	0	0	0	0	0	0.0555556	0.0555556	0	0.0555556	0	0	0	0	0	0	0	0	0	0	0	0.00150108	0.00150366	0	0.00130995	0
155	Beta-Ala-His dipeptidase OS=Homo sapiens GN=CNDP1 PE=1 SV=4	CNDP1_HUMAN	57	4.95	unknown	0	0	0	0	0	0	0	0	0	0	0	0	0	0	0	0	0	0	0	0	0	0	0	0	0	0	0	0	0	0	0	0	0	0	0	0	0	0	0	0	0	0	0	0
156	CD9 antigen OS=Homo sapiens GN=CD9 PE=1 SV=4	CD9_HUMAN	25	7.19	Homo sapiens	0	0	0	0	0	0	0	0	0	0	2	2	2	2	0	0	0	0	0	0	0	0	0	0	0	0.08	0.08	0.08	0.08	0	0	0	0	0	0	0	0	0	0	0	0.00216527	0.0022243	0.00188633	0.00190573
157	Calmodulin-like protein 5 OS=Homo sapiens GN=CALML5 PE=1 SV=2	CALL5_HUMAN	16	4.05	Homo sapiens	3	3	3	0	0	0	0	0	0	0	0	0	0	0	0	0.1875	0.1875	0.1875	0	0	0	0	0	0	0	0	0	0	0	0	0.00882912	0.00839214	0.00845651	0	0	0	0	0	0	0	0	0	0	0
158	Complement C4-B OS=Homo sapiens GN=C4B PE=1 SV=2	CO4B_HUMAN	193	7.28	Homo sapiens	0	0	0	0	0	0	0	0	0	0	0	0	0	0	0	0	0	0	0	0	0	0	0	0	0	0	0	0	0	0	0	0	0	0	0	0	0	0	0	0	0	0	0	0
159	Tubulin beta-1 chain OS=Homo sapiens GN=TUBB1 PE=1 SV=1	TBB1_HUMAN	50	4.82	Homo sapiens	0	0	0	0	0	0	0	0	0	0	0	0	0	0	0	0	0	0	0	0	0	0	0	0	0	0	0	0	0	0	0	0	0	0	0	0	0	0	0	0	0	0	0	0
160	Ig kappa chain V-I region DEE OS=Homo sapiens PE=1 SV=1	KV105_HUMAN	12	8.46	Homo sapiens	0	0	0	0	0	0	0	0	0	0	0	0	0	2	0	0	0	0	0	0	0	0	0	0	0	0	0	0	0.166667	0	0	0	0	0	0	0	0	0	0	0	0	0	0	0.00397027
161	Junction plakoglobin OS=Homo sapiens GN=JUP PE=1 SV=3	PLAK_HUMAN	82	6.05	Homo sapiens	0	0	0	0	0	0	2	0	0	0	2	2	3	2	0	0	0	0	0	0	0	0.0243902	0	0	0	0.0243902	0.0243902	0.0365854	0.0243902	0	0	0	0	0	0	0	0.00139857	0	0	0	0.000660145	0.000678141	0.000862652	0.000581015
162	Talin-1 OS=Homo sapiens GN=TLN1 PE=1 SV=3	TLN1_HUMAN	270	5.94	Homo sapiens	0	0	0	0	0	0	0	0	0	0	0	0	0	0	2	0	0	0	0	0	0	0	0	0	0	0	0	0	0	0.00740741	0	0	0	0	0	0	0	0	0	0	0	0	0	0
163	Elongation factor 1-alpha 2 OS=Homo sapiens GN=EEF1A2 PE=1 SV=1	EF1A2_HUMAN	50	9.5	unknown	0	0	0	0	0	0	0	0	0	0	0	0	0	0	0	0	0	0	0	0	0	0	0	0	0	0	0	0	0	0	0	0	0	0	0	0	0	0	0	0	0	0	0	0
164	Tubulin alpha-4A chain OS=Homo sapiens GN=TUBA4A PE=1 SV=1	TBA4A_HUMAN	50	4.69	Homo sapiens	0	0	0	0	0	0	0	0	0	0	0	0	0	0	0	0	0	0	0	0	0	0	0	0	0	0	0	0	0	0	0	0	0	0	0	0	0	0	0	0	0	0	0	0
165	Lumican OS=Homo sapiens GN=LUM PE=1 SV=2	LUM_HUMAN	38	6.6	Homo sapiens	0	0	0	0	0	0	0	0	0	0	0	0	0	0	0	0	0	0	0	0	0	0	0	0	0	0	0	0	0	0	0	0	0	0	0	0	0	0	0	0	0	0	0	0
166	von Willebrand factor OS=Homo sapiens GN=VWF PE=1 SV=4	VWF_HUMAN	309	5.15	Homo sapiens	0	2	0	0	0	0	0	0	0	0	0	0	4	4	5	0	0.00647249	0	0	0	0	0	0	0	0	0	0	0.012945	0.012945	0.0161812	0	0.000289696	0	0	0	0	0	0	0	0	0	0	0.000305232	0.00030837
167	Platelet glycoprotein Ib beta chain OS=Homo sapiens GN=GP1BB PE=1 SV=1	GP1BB_HUMAN	22	9.37	Homo sapiens	0	0	0	0	0	0	0	0	2	0	0	0	0	2	2	0	0	0	0	0	0	0	0	0.0909091	0	0	0	0	0.0909091	0.0909091	0	0	0	0	0	0	0	0	0.00554733	0	0	0	0	0.0021656
168	HLA class I histocompatibility antigen, A-11 alpha chain OS=Homo sapiens GN=HLA-A PE=1 SV=1	1A11_HUMAN	41	6.06	unknown	0	0	0	0	0	0	0	0	0	0	0	0	7	8	10	0	0	0	0	0	0	0	0	0	0	0	0	0.170732	0.195122	0.243902	0	0	0	0	0	0	0	0	0	0	0	0	0.00402571	0.00464812
169	Mannan-binding lectin serine protease 2 OS=Homo sapiens GN=MASP2 PE=1 SV=4	MASP2_HUMAN	76	5.37	Homo sapiens	0	0	0	0	0	0	0	0	0	0	0	0	0	0	0	0	0	0	0	0	0	0	0	0	0	0	0	0	0	0	0	0	0	0	0	0	0	0	0	0	0	0	0	0
170	Amyloid beta A4 protein OS=Homo sapiens GN=APP PE=1 SV=3	A4_HUMAN	87	4.45	Homo sapiens	0	0	0	0	0	0	0	0	0	0	0	0	0	0	0	0	0	0	0	0	0	0	0	0	0	0	0	0	0	0	0	0	0	0	0	0	0	0	0	0	0	0	0	0
171	Voltage-dependent anion-selective channel protein 3 OS=Homo sapiens GN=VDAC3 PE=1 SV=1	VDAC3_HUMAN	31	8.9	Homo sapiens	0	0	0	0	0	0	0	0	0	0	0	0	4	2	2	0	0	0	0	0	0	0	0	0	0	0	0	0.129032	0.0645161	0.0645161	0	0	0	0	0	0	0	0	0	0	0	0	0.00304247	0.00153688
172	Keratin, type II cuticular Hb6 OS=Homo sapiens GN=KRT86 PE=1 SV=1	KRT86_HUMAN	53	5.35	unknown	0	0	0	0	5	7	0	0	0	0	0	0	0	0	0	0	0	0	0	0.0943396	0.132075	0	0	0	0	0	0	0	0	0	0	0	0	0	0.0045916	0.00626419	0	0	0	0	0	0	0	0
173	Resistin OS=Homo sapiens GN=RETN PE=2 SV=1	RETN_HUMAN	11	6.89	Homo sapiens	2	0	2	0	0	0	0	0	0	0	0	0	0	0	0	0.181818	0	0.181818	0	0	0	0	0	0	0	0	0	0	0	0	0.00856157	0	0.00820026	0	0	0	0	0	0	0	0	0	0	0
174	Band 3 anion transport protein OS=Homo sapiens GN=SLC4A1 PE=1 SV=3	B3AT_HUMAN	102	4.84	Homo sapiens	0	0	0	2	2	0	0	0	0	2	2	2	0	0	0	0	0	0	0.0196078	0.0196078	0	0	0	0	0.0196078	0.0196078	0.0196078	0	0	0	0	0	0	0.000902477	0.000954332	0	0	0	0	0.000529794	0.000530704	0.000545172	0	0
175	Filaggrin OS=Homo sapiens GN=FLG PE=1 SV=3	FILA_HUMAN	435	9.6	Homo sapiens	0	3	2	0	0	0	0	0	0	0	0	0	0	2	3	0	0.00689655	0.0045977	0	0	0	0	0	0	0	0	0	0	0.0045977	0.00689655	0	0.000308676	0.000207363	0	0	0	0	0	0	0	0	0	0	0.000109525
176	Alpha-actinin-1 OS=Homo sapiens GN=ACTN1 PE=1 SV=2	ACTN1_HUMAN	103	5.07	Homo sapiens	0	0	0	0	0	0	0	0	0	0	0	0	0	0	0	0	0	0	0	0	0	0	0	0	0	0	0	0	0	0	0	0	0	0	0	0	0	0	0	0	0	0	0	0
177	Keratin, type I cuticular Ha1 OS=Homo sapiens GN=KRT31 PE=1 SV=3	K1H1_HUMAN	47	4.53	unknown	0	0	0	6	5	6	0	0	0	0	0	0	0	0	0	0	0	0	0.12766	0.106383	0.12766	0	0	0	0	0	0	0	0	0	0	0	0	0.0058757	0.00517776	0.00605475	0	0	0	0	0	0	0	0
178	Pleckstrin OS=Homo sapiens GN=PLEK PE=1 SV=3	PLEK_HUMAN	40	8.45	Homo sapiens	0	0	0	0	0	0	0	0	0	0	0	0	3	2	2	0	0	0	0	0	0	0	0	0	0	0	0	0.075	0.05	0.05	0	0	0	0	0	0	0	0	0	0	0	0	0.00176844	0.00119108
179	Calreticulin OS=Homo sapiens GN=CALR PE=1 SV=1	CALR_HUMAN	48	4.04	Homo sapiens	0	0	0	0	0	0	0	0	0	0	0	0	0	0	0	0	0	0	0	0	0	0	0	0	0	0	0	0	0	0	0	0	0	0	0	0	0	0	0	0	0	0	0	0
180	Integrin alpha-2 OS=Homo sapiens GN=ITGA2 PE=1 SV=1	ITA2_HUMAN	129	4.95	unknown	0	0	0	0	0	0	0	0	0	0	0	0	4	7	4	0	0	0	0	0	0	0	0	0	0	0	0	0.0310078	0.0542636	0.0310078	0	0	0	0	0	0	0	0	0	0	0	0	0.000731136	0.00129265
181	Serglycin OS=Homo sapiens GN=SRGN PE=1 SV=3	SRGN_HUMAN	18	4.57	Homo sapiens	0	0	0	0	0	0	0	0	0	0	0	0	0	0	0	0	0	0	0	0	0	0	0	0	0	0	0	0	0	0	0	0	0	0	0	0	0	0	0	0	0	0	0	0
182	ATP synthase subunit alpha, mitochondrial OS=Homo sapiens GN=ATP5A1 PE=1 SV=1	ATPA_HUMAN	60	9.56	Homo sapiens	0	0	0	0	0	0	0	0	0	0	0	0	2	0	0	0	0	0	0	0	0	0	0	0	0	0	0	0.0333333	0	0	0	0	0	0	0	0	0	0	0	0	0	0	0.000785971	0
183	Gelsolin OS=Homo sapiens GN=GSN PE=1 SV=1	GELS_HUMAN	86	6.19	Homo sapiens	0	0	0	0	0	0	0	0	0	0	0	0	0	0	0	0	0	0	0	0	0	0	0	0	0	0	0	0	0	0	0	0	0	0	0	0	0	0	0	0	0	0	0	0
184	Alpha-2-antiplasmin OS=Homo sapiens GN=SERPINF2 PE=1 SV=3	A2AP_HUMAN	55	6.24	Homo sapiens	0	0	0	0	0	0	0	0	0	0	0	0	0	0	0	0	0	0	0	0	0	0	0	0	0	0	0	0	0	0	0	0	0	0	0	0	0	0	0	0	0	0	0	0
185	Ig kappa chain V-III region IARC/BL41 OS=Homo sapiens PE=4 SV=1	KV311_HUMAN	14	4.59	unknown	0	0	0	0	0	0	0	0	0	0	0	2	0	0	0	0	0	0	0	0	0	0	0	0	0	0	0.142857	0	0	0	0	0	0	0	0	0	0	0	0	0	0	0.00397197	0	0
186	Apolipoprotein C-IV OS=Homo sapiens GN=APOC4 PE=1 SV=1	APOC4_HUMAN	15	9.13	Homo sapiens	0	0	0	0	0	0	2	0	0	0	0	0	0	0	0	0	0	0	0	0	0	0.133333	0	0	0	0	0	0	0	0	0	0	0	0	0	0	0.00764553	0	0	0	0	0	0	0
187	Lipopolysaccharide-binding protein OS=Homo sapiens GN=LBP PE=1 SV=3	LBP_HUMAN	53	6.68	Homo sapiens	0	0	0	0	0	0	0	0	0	0	0	0	0	0	0	0	0	0	0	0	0	0	0	0	0	0	0	0	0	0	0	0	0	0	0	0	0	0	0	0	0	0	0	0
188	Polymeric immunoglobulin receptor OS=Homo sapiens GN=PIGR PE=1 SV=4	PIGR_HUMAN	83	5.43	unknown	0	0	2	0	0	0	0	0	0	2	2	2	0	0	0	0	0	0.0240964	0	0	0	0	0	0	0.0240964	0.0240964	0.0240964	0	0	0	0	0	0.00108678	0	0	0	0	0	0	0.000651072	0.000652191	0.00066997	0	0
189	Serum amyloid A-4 protein OS=Homo sapiens GN=SAA4 PE=1 SV=2	SAA4_HUMAN	15	9.38	Homo sapiens	0	0	0	0	0	0	0	0	0	0	0	0	0	0	0	0	0	0	0	0	0	0	0	0	0	0	0	0	0	0	0	0	0	0	0	0	0	0	0	0	0	0	0	0
190	Serine/threonine-protein kinase N3 OS=Homo sapiens GN=PKN3 PE=1 SV=1	PKN3_HUMAN	99	8.56	unknown	0	0	0	0	0	0	0	0	0	2	0	0	0	0	0	0	0	0	0	0	0	0	0	0	0.020202	0	0	0	0	0	0	0	0	0	0	0	0	0	0	0.000545848	0	0	0	0
191	Isocitrate dehydrogenase [NADP], mitochondrial OS=Homo sapiens GN=IDH2 PE=1 SV=2	IDHP_HUMAN	51	8.95	Homo sapiens	0	0	0	0	0	0	0	2	0	0	0	0	0	0	0	0	0	0	0	0	0	0	0.0392157	0	0	0	0	0	0	0	0	0	0	0	0	0	0	0.00224556	0	0	0	0	0	0
192	Alpha-1-acid glycoprotein 2 OS=Homo sapiens GN=ORM2 PE=1 SV=2	A1AG2_HUMAN	24	4.76	Homo sapiens	0	0	0	0	0	0	0	0	0	0	0	0	0	0	0	0	0	0	0	0	0	0	0	0	0	0	0	0	0	0	0	0	0	0	0	0	0	0	0	0	0	0	0	0
193	HLA class I histocompatibility antigen, B-56 alpha chain OS=Homo sapiens GN=HLA-B PE=1 SV=1	1B56_HUMAN	40	6.06	unknown	0	0	0	0	0	0	0	0	0	0	3	4	9	9	10	0	0	0	0	0	0	0	0	0	0	0.075	0.1	0.225	0.225	0.25	0	0	0	0	0	0	0	0	0	0	0.00202994	0.00278038	0.00530531	0.00535986
194	Leukocyte surface antigen CD47 OS=Homo sapiens GN=CD47 PE=1 SV=1	CD47_HUMAN	35	7.27	Homo sapiens	0	0	0	0	0	0	0	0	0	0	0	0	0	0	0	0	0	0	0	0	0	0	0	0	0	0	0	0	0	0	0	0	0	0	0	0	0	0	0	0	0	0	0	0
195	Protein S100-A7 OS=Homo sapiens GN=S100A7 PE=1 SV=4	S10A7_HUMAN	11	6.78	Homo sapiens	3	2	3	0	0	0	2	0	2	0	0	0	0	0	0	0.272727	0.181818	0.272727	0	0	0	0.181818	0	0.181818	0	0	0	0	0	0	0.0128424	0.00813783	0.0123004	0	0	0	0.0104257	0	0.0110947	0	0	0	0	0
196	Adenosylhomocysteinase OS=Homo sapiens GN=AHCY PE=1 SV=4	SAHH_HUMAN	48	6.29	unknown	0	0	0	0	0	0	0	0	0	0	0	0	0	0	0	0	0	0	0	0	0	0	0	0	0	0	0	0	0	0	0	0	0	0	0	0	0	0	0	0	0	0	0	0
197	Tubulin beta chain OS=Homo sapiens GN=TUBB PE=1 SV=2	TBB5_HUMAN	50	4.52	Homo sapiens	0	0	0	0	0	0	0	0	0	0	0	0	0	0	0	0	0	0	0	0	0	0	0	0	0	0	0	0	0	0	0	0	0	0	0	0	0	0	0	0	0	0	0	0
198	Suprabasin OS=Homo sapiens GN=SBSN PE=1 SV=2	SBSN_HUMAN	61	7.01	Homo sapiens	2	2	2	0	0	0	0	0	0	2	0	0	0	0	2	0.0327869	0.0327869	0.0327869	0	0	0	0	0	0	0.0327869	0	0	0	0	0.0327869	0.00154389	0.00146748	0.00147873	0	0	0	0	0	0	0.000885885	0	0	0	0
199	Protein S100-A8 OS=Homo sapiens GN=S100A8 PE=1 SV=1	S10A8_HUMAN	11	7.07	Homo sapiens	0	2	2	0	0	0	2	0	2	0	0	0	0	0	0	0	0.181818	0.181818	0	0	0	0.181818	0	0.181818	0	0	0	0	0	0	0	0.00813783	0.00820026	0	0	0	0.0104257	0	0.0110947	0	0	0	0	0
200	Integrin alpha-6 OS=Homo sapiens GN=ITGA6 PE=1 SV=5	ITA6_HUMAN	127	6.57	Homo sapiens	0	0	0	0	0	0	0	0	0	0	0	0	2	2	0	0	0	0	0	0	0	0	0	0	0	0	0	0.015748	0.015748	0	0	0	0	0	0	0	0	0	0	0	0	0	0.000371325	0.000375144
201	Keratin, type II cytoskeletal 6B OS=Homo sapiens GN=KRT6B PE=1 SV=5	K2C6B_HUMAN	60	8.16	unknown	0	0	0	0	0	0	0	0	0	0	0	0	0	0	30	0	0	0	0	0	0	0	0	0	0	0	0	0	0	0.5	0	0	0	0	0	0	0	0	0	0	0	0	0	0
202	Heat shock protein HSP 90-alpha OS=Homo sapiens GN=HSP90AA1 PE=1 SV=5	HS90A_HUMAN	85	4.66	Homo sapiens	0	0	0	0	0	0	0	0	0	0	0	0	0	0	0	0	0	0	0	0	0	0	0	0	0	0	0	0	0	0	0	0	0	0	0	0	0	0	0	0	0	0	0	0
203	Histone H4 OS=Homo sapiens GN=HIST1H4A PE=1 SV=2	H4_HUMAN	11	11.91	unknown	0	0	0	0	0	0	0	0	0	0	0	0	0	0	2	0	0	0	0	0	0	0	0	0	0	0	0	0	0	0.181818	0	0	0	0	0	0	0	0	0	0	0	0	0	0
204	Protein S100-A9 OS=Homo sapiens GN=S100A9 PE=1 SV=1	S10A9_HUMAN	13	6.07	unknown	0	2	0	0	0	0	0	0	0	0	0	0	0	0	0	0	0.153846	0	0	0	0	0	0	0	0	0	0	0	0	0	0	0.00688586	0	0	0	0	0	0	0	0	0	0	0	0
205	Selenoprotein P OS=Homo sapiens GN=SEPP1 PE=1 SV=3	SEPP1_HUMAN	43	7.92	Homo sapiens	0	0	0	0	0	0	0	0	0	0	0	0	0	0	0	0	0	0	0	0	0	0	0	0	0	0	0	0	0	0	0	0	0	0	0	0	0	0	0	0	0	0	0	0
206	Desmoglein-1 OS=Homo sapiens GN=DSG1 PE=1 SV=2	DSG1_HUMAN	114	4.66	Homo sapiens	0	0	0	0	0	0	0	0	0	2	2	3	0	0	0	0	0	0	0	0	0	0	0	0	0.0175439	0.0175439	0.0263158	0	0	0	0	0	0	0	0	0	0	0	0	0.000474026	0.000474841	0.000731678	0	0
207	Ig kappa chain V-II region TEW OS=Homo sapiens PE=1 SV=1	KV204_HUMAN	12	8.85	Homo sapiens	0	0	0	0	0	0	0	0	0	0	0	0	0	0	0	0	0	0	0	0	0	0	0	0	0	0	0	0	0	0	0	0	0	0	0	0	0	0	0	0	0	0	0	0
208	Apolipoprotein F OS=Homo sapiens GN=APOF PE=1 SV=2	APOF_HUMAN	35	5.36	Homo sapiens	0	0	0	0	0	0	0	0	0	0	0	0	0	0	0	0	0	0	0	0	0	0	0	0	0	0	0	0	0	0	0	0	0	0	0	0	0	0	0	0	0	0	0	0
209	Inter-alpha-trypsin inhibitor heavy chain H4 OS=Homo sapiens GN=ITIH4 PE=1 SV=4	ITIH4_HUMAN	103	6.97	Homo sapiens	0	0	0	0	0	0	0	0	0	0	0	0	0	0	0	0	0	0	0	0	0	0	0	0	0	0	0	0	0	0	0	0	0	0	0	0	0	0	0	0	0	0	0	0
210	Platelet basic protein OS=Homo sapiens GN=PPBP PE=1 SV=3	CXCL7_HUMAN	14	9.07	Homo sapiens	0	0	0	0	0	0	0	0	0	0	0	0	0	0	0	0	0	0	0	0	0	0	0	0	0	0	0	0	0	0	0	0	0	0	0	0	0	0	0	0	0	0	0	0
211	Collectin-11 OS=Homo sapiens GN=COLEC11 PE=1 SV=1	COL11_HUMAN	29	5.06	Homo sapiens	0	0	0	0	0	0	0	0	0	0	0	0	0	0	0	0	0	0	0	0	0	0	0	0	0	0	0	0	0	0	0	0	0	0	0	0	0	0	0	0	0	0	0	0
212	Extracellular superoxide dismutase [Cu-Zn] OS=Homo sapiens GN=SOD3 PE=1 SV=2	SODE_HUMAN	26	6.59	Homo sapiens	0	0	0	0	0	0	0	0	0	0	0	0	0	0	0	0	0	0	0	0	0	0	0	0	0	0	0	0	0	0	0	0	0	0	0	0	0	0	0	0	0	0	0	0
213	Fibulin-1 OS=Homo sapiens GN=FBLN1 PE=1 SV=4	FBLN1_HUMAN	77	4.86	Homo sapiens	0	0	0	0	0	0	0	0	0	0	0	0	0	0	0	0	0	0	0	0	0	0	0	0	0	0	0	0	0	0	0	0	0	0	0	0	0	0	0	0	0	0	0	0
214	Myosin light polypeptide 6 OS=Homo sapiens GN=MYL6 PE=1 SV=2	MYL6_HUMAN	17	4.29	Homo sapiens	0	0	0	0	0	0	0	0	0	0	0	0	0	0	0	0	0	0	0	0	0	0	0	0	0	0	0	0	0	0	0	0	0	0	0	0	0	0	0	0	0	0	0	0
215	Keratin, type II cuticular Hb4 OS=Homo sapiens GN=KRT84 PE=2 SV=2	KRT84_HUMAN	65	7.61	unknown	0	0	0	0	0	0	0	0	0	0	0	0	0	0	0	0	0	0	0	0	0	0	0	0	0	0	0	0	0	0	0	0	0	0	0	0	0	0	0	0	0	0	0	0
216	Amine oxidase [flavin-containing] B OS=Homo sapiens GN=MAOB PE=1 SV=3	AOFB_HUMAN	59	7.55	unknown	0	0	0	0	0	0	0	0	0	2	2	2	2	0	0	0	0	0	0	0	0	0	0	0	0.0338983	0.0338983	0.0338983	0.0338983	0	0	0	0	0	0	0	0	0	0	0	0.000915915	0.000917489	0.000942501	0.000799293	0
217	Angiotensinogen OS=Homo sapiens GN=AGT PE=1 SV=1	ANGT_HUMAN	53	6.27	Homo sapiens	0	0	0	0	0	0	0	0	0	0	0	0	0	0	0	0	0	0	0	0	0	0	0	0	0	0	0	0	0	0	0	0	0	0	0	0	0	0	0	0	0	0	0	0
218	Disintegrin and metalloproteinase domain-containing protein 10 OS=Homo sapiens GN=ADAM10 PE=1 SV=1	ADA10_HUMAN	84	7.81	Homo sapiens	0	0	0	0	0	0	0	0	0	0	0	0	0	2	2	0	0	0	0	0	0	0	0	0	0	0	0	0	0.0238095	0.0238095	0	0	0	0	0	0	0	0	0	0	0	0	0	0.000567181
219	GTP-binding nuclear protein Ran OS=Homo sapiens GN=RAN PE=1 SV=3	RAN_HUMAN	24	7.59	Homo sapiens	0	0	0	0	0	0	0	0	0	0	0	0	0	0	0	0	0	0	0	0	0	0	0	0	0	0	0	0	0	0	0	0	0	0	0	0	0	0	0	0	0	0	0	0
220	Ig kappa chain V-I region Scw OS=Homo sapiens PE=1 SV=1	KV117_HUMAN	12	8.85	unknown	0	0	0	0	0	0	0	0	0	7	0	0	0	0	0	0	0	0	0	0	0	0	0	0	0.583333	0	0	0	0	0	0	0	0	0	0	0	0	0	0	0.0157614	0	0	0	0
221	Coagulation factor XII OS=Homo sapiens GN=F12 PE=1 SV=3	FA12_HUMAN	68	7.76	Homo sapiens	0	0	0	0	0	0	0	0	0	0	0	0	0	0	0	0	0	0	0	0	0	0	0	0	0	0	0	0	0	0	0	0	0	0	0	0	0	0	0	0	0	0	0	0
222	Ig kappa chain V-III region GOL OS=Homo sapiens PE=1 SV=1	KV307_HUMAN	12	9.53	unknown	0	0	0	0	0	0	0	0	0	0	0	0	0	0	0	0	0	0	0	0	0	0	0	0	0	0	0	0	0	0	0	0	0	0	0	0	0	0	0	0	0	0	0	0
223	Tubulin alpha-1B chain OS=Homo sapiens GN=TUBA1B PE=1 SV=1	TBA1B_HUMAN	50	4.7	Homo sapiens	0	0	0	0	0	0	0	0	0	0	0	0	0	0	0	0	0	0	0	0	0	0	0	0	0	0	0	0	0	0	0	0	0	0	0	0	0	0	0	0	0	0	0	0
224	Alpha-enolase OS=Homo sapiens GN=ENO1 PE=1 SV=2	ENOA_HUMAN	47	7.46	Homo sapiens	0	0	0	0	0	0	0	0	0	0	0	0	0	0	0	0	0	0	0	0	0	0	0	0	0	0	0	0	0	0	0	0	0	0	0	0	0	0	0	0	0	0	0	0
225	Fatty acid-binding protein, epidermal OS=Homo sapiens GN=FABP5 PE=1 SV=3	FABP5_HUMAN	15	7.05	Homo sapiens	2	2	0	0	0	0	0	0	0	0	0	0	0	0	0	0.133333	0.133333	0	0	0	0	0	0	0	0	0	0	0	0	0	0.00627849	0.00596774	0	0	0	0	0	0	0	0	0	0	0	0
226	Alpha-1B-glycoprotein OS=Homo sapiens GN=A1BG PE=1 SV=4	A1BG_HUMAN	54	5.71	Homo sapiens	0	0	0	0	0	0	0	0	0	0	0	0	0	0	0	0	0	0	0	0	0	0	0	0	0	0	0	0	0	0	0	0	0	0	0	0	0	0	0	0	0	0	0	0
227	Prolactin-inducible protein OS=Homo sapiens GN=PIP PE=1 SV=1	PIP_HUMAN	17	8.18	unknown	2	2	4	0	0	0	0	0	0	0	0	0	0	0	0	0.117647	0.117647	0.235294	0	0	0	0	0	0	0	0	0	0	0	0	0.00553984	0.00526566	0.0106121	0	0	0	0	0	0	0	0	0	0	0
228	Four and a half LIM domains protein 1 OS=Homo sapiens GN=FHL1 PE=1 SV=4	FHL1_HUMAN	36	9.15	unknown	0	0	0	0	0	0	0	0	0	0	0	0	0	0	2	0	0	0	0	0	0	0	0	0	0	0	0	0	0	0.0555556	0	0	0	0	0	0	0	0	0	0	0	0	0	0
229	Platelet glycoprotein Ib alpha chain OS=Homo sapiens GN=GP1BA PE=1 SV=2	GP1BA_HUMAN	72	6.24	Homo sapiens	0	0	0	0	0	0	0	0	0	0	0	0	0	0	0	0	0	0	0	0	0	0	0	0	0	0	0	0	0	0	0	0	0	0	0	0	0	0	0	0	0	0	0	0
230	Retinol-binding protein 4 OS=Homo sapiens GN=RBP4 PE=1 SV=3	RET4_HUMAN	23	5.85	Homo sapiens	0	0	0	0	0	0	0	0	0	0	0	0	0	0	0	0	0	0	0	0	0	0	0	0	0	0	0	0	0	0	0	0	0	0	0	0	0	0	0	0	0	0	0	0
231	Fermitin family homolog 3 OS=Homo sapiens GN=FERMT3 PE=1 SV=1	URP2_HUMAN	76	6.98	Homo sapiens	0	0	0	0	0	0	0	0	0	0	0	0	0	0	0	0	0	0	0	0	0	0	0	0	0	0	0	0	0	0	0	0	0	0	0	0	0	0	0	0	0	0	0	0
232	Collagen alpha-1(XXI) chain OS=Homo sapiens GN=COL21A1 PE=2 SV=1	COLA1_HUMAN	99	8.48	unknown	0	0	0	0	0	0	0	0	0	0	0	0	0	0	0	0	0	0	0	0	0	0	0	0	0	0	0	0	0	0	0	0	0	0	0	0	0	0	0	0	0	0	0	0
233	40S ribosomal protein S13 OS=Homo sapiens GN=RPS13 PE=1 SV=2	RS13_HUMAN	17	11.19	unknown	0	0	0	0	0	0	0	0	0	0	0	0	0	0	0	0	0	0	0	0	0	0	0	0	0	0	0	0	0	0	0	0	0	0	0	0	0	0	0	0	0	0	0	0
234	Histone H2A type 1-C OS=Homo sapiens GN=HIST1H2AC PE=1 SV=3	H2A1C_HUMAN	14	11.66	unknown	0	0	0	0	0	0	0	0	0	0	0	0	0	0	0	0	0	0	0	0	0	0	0	0	0	0	0	0	0	0	0	0	0	0	0	0	0	0	0	0	0	0	0	0
235	Beta-2-microglobulin OS=Homo sapiens GN=B2M PE=1 SV=1	B2MG_HUMAN	14	6.51	Homo sapiens	0	0	0	0	0	0	0	0	0	0	0	0	0	0	3	0	0	0	0	0	0	0	0	0	0	0	0	0	0	0.214286	0	0	0	0	0	0	0	0	0	0	0	0	0	0
236	Ras-related protein Rab-10 OS=Homo sapiens GN=RAB10 PE=1 SV=1	RAB10_HUMAN	23	8.61	Homo sapiens	0	0	0	0	0	0	0	0	0	0	0	0	0	0	0	0	0	0	0	0	0	0	0	0	0	0	0	0	0	0	0	0	0	0	0	0	0	0	0	0	0	0	0	0
237	Serum amyloid A-2 protein OS=Homo sapiens GN=SAA2 PE=1 SV=1	SAA2_HUMAN	14	9.48	Homo sapiens	0	0	0	0	0	0	0	0	0	0	0	0	0	0	0	0	0	0	0	0	0	0	0	0	0	0	0	0	0	0	0	0	0	0	0	0	0	0	0	0	0	0	0	0
238	HLA class I histocompatibility antigen, B-40 alpha chain OS=Homo sapiens GN=HLA-B PE=1 SV=1	1B40_HUMAN	41	6.51	unknown	0	0	0	0	0	0	0	0	0	0	0	0	8	12	12	0	0	0	0	0	0	0	0	0	0	0	0	0.195122	0.292683	0.292683	0	0	0	0	0	0	0	0	0	0	0	0	0.00460081	0.00697218
239	Voltage-dependent anion-selective channel protein 2 OS=Homo sapiens GN=VDAC2 PE=1 SV=2	VDAC2_HUMAN	32	7.65	unknown	0	0	0	0	0	0	0	0	0	0	0	0	2	2	0	0	0	0	0	0	0	0	0	0	0	0	0	0.0625	0.0625	0	0	0	0	0	0	0	0	0	0	0	0	0	0.0014737	0.00148885
240	Collectin-10 OS=Homo sapiens GN=COLEC10 PE=2 SV=2	COL10_HUMAN	31	7.39	Homo sapiens	0	0	0	0	0	0	0	0	0	0	0	0	0	0	0	0	0	0	0	0	0	0	0	0	0	0	0	0	0	0	0	0	0	0	0	0	0	0	0	0	0	0	0	0
241	tRNA-dihydrouridine(47) synthase [NAD(P)(+)]-like OS=Homo sapiens GN=DUS3L PE=1 SV=2	DUS3L_HUMAN	72	8.4	unknown	0	0	0	0	0	0	0	0	0	0	0	0	0	0	0	0	0	0	0	0	0	0	0	0	0	0	0	0	0	0	0	0	0	0	0	0	0	0	0	0	0	0	0	0
242	Cathelicidin antimicrobial peptide OS=Homo sapiens GN=CAMP PE=1 SV=1	CAMP_HUMAN	19	10.03	Homo sapiens	0	0	0	0	0	0	0	0	0	0	0	0	3	0	2	0	0	0	0	0	0	0	0	0	0	0	0	0.157895	0	0.105263	0	0	0	0	0	0	0	0	0	0	0	0	0.00372302	0
243	Barrier-to-autointegration factor OS=Homo sapiens GN=BANF1 PE=1 SV=1	BAF_HUMAN	10	5.88	unknown	0	0	0	0	0	0	0	0	0	0	0	0	0	0	0	0	0	0	0	0	0	0	0	0	0	0	0	0	0	0	0	0	0	0	0	0	0	0	0	0	0	0	0	0
244	IQ and AAA domain-containing protein 1-like OS=Homo sapiens GN=IQCA1L PE=3 SV=2	IQCAL_HUMAN	95	9.79	unknown	0	0	0	0	0	0	2	0	2	0	0	0	0	0	0	0	0	0	0	0	0	0.0210526	0	0.0210526	0	0	0	0	0	0	0	0	0	0	0	0	0.00120719	0	0.00128464	0	0	0	0	0
245	10 kDa heat shock protein, mitochondrial OS=Homo sapiens GN=HSPE1 PE=1 SV=2	CH10_HUMAN	11	9.49	unknown	0	0	0	0	0	0	0	0	0	0	0	0	2	0	0	0	0	0	0	0	0	0	0	0	0	0	0	0.181818	0	0	0	0	0	0	0	0	0	0	0	0	0	0	0.00428712	0
246	40S ribosomal protein S9 OS=Homo sapiens GN=RPS9 PE=1 SV=3	RS9_HUMAN	23	11.32	unknown	0	0	0	0	0	0	0	0	0	0	0	0	0	0	0	0	0	0	0	0	0	0	0	0	0	0	0	0	0	0	0	0	0	0	0	0	0	0	0	0	0	0	0	0
247	Caspase-14 OS=Homo sapiens GN=CASP14 PE=1 SV=2	CASPE_HUMAN	28	5.28	unknown	0	2	2	0	0	0	0	0	0	0	0	0	0	0	0	0	0.0714286	0.0714286	0	0	0	0	0	0	0	0	0	0	0	0	0	0.00319701	0.00322153	0	0	0	0	0	0	0	0	0	0	0
248	SPARC OS=Homo sapiens GN=SPARC PE=1 SV=1	SPRC_HUMAN	35	4.47	Homo sapiens	0	0	0	0	0	0	0	0	0	0	0	0	0	0	0	0	0	0	0	0	0	0	0	0	0	0	0	0	0	0	0	0	0	0	0	0	0	0	0	0	0	0	0	0
249	Tropomyosin beta chain OS=Homo sapiens GN=TPM2 PE=1 SV=1	TPM2_HUMAN	33	4.36	unknown	0	0	0	0	0	0	0	0	0	0	0	0	0	0	0	0	0	0	0	0	0	0	0	0	0	0	0	0	0	0	0	0	0	0	0	0	0	0	0	0	0	0	0	0
250	L-lactate dehydrogenase A chain OS=Homo sapiens GN=LDHA PE=1 SV=2	LDHA_HUMAN	37	8.45	unknown	0	0	0	0	0	0	0	0	0	0	0	0	0	0	0	0	0	0	0	0	0	0	0	0	0	0	0	0	0	0	0	0	0	0	0	0	0	0	0	0	0	0	0	0
251	Endonuclease domain-containing 1 protein OS=Homo sapiens GN=ENDOD1 PE=1 SV=2	ENDD1_HUMAN	55	5.38	Homo sapiens	0	0	0	0	0	0	0	0	0	0	0	0	0	0	0	0	0	0	0	0	0	0	0	0	0	0	0	0	0	0	0	0	0	0	0	0	0	0	0	0	0	0	0	0
252	Thioredoxin-dependent peroxide reductase, mitochondrial OS=Homo sapiens GN=PRDX3 PE=1 SV=3	PRDX3_HUMAN	28	7.88	Homo sapiens	0	0	0	0	0	0	0	0	0	0	0	0	2	0	0	0	0	0	0	0	0	0	0	0	0	0	0	0.0714286	0	0	0	0	0	0	0	0	0	0	0	0	0	0	0.00168422	0
253	Choline transporter-like protein 1 OS=Homo sapiens GN=SLC44A1 PE=1 SV=1	CTL1_HUMAN	73	8.69	unknown	0	0	0	0	0	0	0	0	0	0	0	0	2	0	0	0	0	0	0	0	0	0	0	0	0	0	0	0.0273973	0	0	0	0	0	0	0	0	0	0	0	0	0	0	0.000646004	0
254	Junctional adhesion molecule A OS=Homo sapiens GN=F11R PE=1 SV=1	JAM1_HUMAN	33	8.02	Homo sapiens	0	0	0	0	0	0	0	0	0	0	0	0	0	0	2	0	0	0	0	0	0	0	0	0	0	0	0	0	0	0.0606061	0	0	0	0	0	0	0	0	0	0	0	0	0	0
255	Ras-related protein Rap-1A OS=Homo sapiens GN=RAP1A PE=1 SV=1	RAP1A_HUMAN	21	6.55	unknown	0	0	0	0	0	0	0	0	0	0	0	0	0	0	0	0	0	0	0	0	0	0	0	0	0	0	0	0	0	0	0	0	0	0	0	0	0	0	0	0	0	0	0	0
256	Aggrecan core protein OS=Homo sapiens GN=ACAN PE=1 SV=2	PGCA_HUMAN	250	3.82	Homo sapiens	0	0	0	0	0	0	0	0	0	0	0	0	0	0	0	0	0	0	0	0	0	0	0	0	0	0	0	0	0	0	0	0	0	0	0	0	0	0	0	0	0	0	0	0
257	Tropomyosin alpha-1 chain OS=Homo sapiens GN=TPM1 PE=1 SV=2	TPM1_HUMAN	33	4.39	Homo sapiens	0	0	0	0	0	0	0	0	0	0	0	0	0	0	0	0	0	0	0	0	0	0	0	0	0	0	0	0	0	0	0	0	0	0	0	0	0	0	0	0	0	0	0	0
258	Lactotransferrin OS=Homo sapiens GN=LTF PE=1 SV=6	TRFL_HUMAN	78	8.17	unknown	0	0	0	0	0	0	0	0	0	0	0	0	0	0	0	0	0	0	0	0	0	0	0	0	0	0	0	0	0	0	0	0	0	0	0	0	0	0	0	0	0	0	0	0
259	Complement component C6 OS=Homo sapiens GN=C6 PE=1 SV=3	CO6_HUMAN	105	6.74	Homo sapiens	0	0	0	0	0	0	0	0	0	0	0	0	0	0	0	0	0	0	0	0	0	0	0	0	0	0	0	0	0	0	0	0	0	0	0	0	0	0	0	0	0	0	0	0
260	Synaptotagmin-like protein 4 OS=Homo sapiens GN=SYTL4 PE=1 SV=2	SYTL4_HUMAN	76	9.42	Homo sapiens	0	0	0	0	0	0	0	0	0	0	0	0	0	0	0	0	0	0	0	0	0	0	0	0	0	0	0	0	0	0	0	0	0	0	0	0	0	0	0	0	0	0	0	0
261	60S ribosomal protein L12 OS=Homo sapiens GN=RPL12 PE=1 SV=1	RL12_HUMAN	18	10.11	unknown	0	0	0	0	0	0	0	0	0	0	0	0	0	0	0	0	0	0	0	0	0	0	0	0	0	0	0	0	0	0	0	0	0	0	0	0	0	0	0	0	0	0	0	0
262	60 kDa heat shock protein, mitochondrial OS=Homo sapiens GN=HSPD1 PE=1 SV=2	CH60_HUMAN	61	5.55	Homo sapiens	0	0	0	0	0	0	0	0	0	0	0	0	0	0	0	0	0	0	0	0	0	0	0	0	0	0	0	0	0	0	0	0	0	0	0	0	0	0	0	0	0	0	0	0
263	Complement factor B OS=Homo sapiens GN=CFB PE=1 SV=2	CFAB_HUMAN	86	7.07	Homo sapiens	0	0	0	0	0	0	0	0	0	0	0	0	2	0	0	0	0	0	0	0	0	0	0	0	0	0	0	0.0232558	0	0	0	0	0	0	0	0	0	0	0	0	0	0	0.000548352	0
264	Latent-transforming growth factor beta-binding protein 1 OS=Homo sapiens GN=LTBP1 PE=1 SV=4	LTBP1_HUMAN	187	5.85	Homo sapiens	0	0	0	0	0	0	0	0	0	0	0	0	0	0	2	0	0	0	0	0	0	0	0	0	0	0	0	0	0	0.0106952	0	0	0	0	0	0	0	0	0	0	0	0	0	0
[truncated: 158 more columns]

## Sheet: MW
						CHOL					DOPG					DOTAP
						21.917	21.119	17.097	36.6412	42.1832	15.7675	35.765	24.4563	47.7391	33.7475	30.5481	53.6856	30.6904	50.507	11.4244
#	Identified Proteins (264)	Accession Number	Molecular Weight	pI	Taxonomy	CHOL_A	CHOL_B	CHOL_C	CHOL_D	CHOL_E	DOPG_A	DOPG_B	DOPG_C	DOPG_D	DOPG_E	DOTAP_A	DOTAP_B	DOTAP_C	DOTAP_D	DOTAP_E
1	Apolipoprotein B-100 OS=Homo sapiens GN=APOB PE=1 SV=2	APOB_HUMAN	516	7.04	Homo sapiens	0.00503904	0.00621685	0.005399	0.00715502	0.00633999	0.00430024	0.00507719	0.00446819	0.00524484	0.00515747	0.00281177	0.00520091	0.0127424	0.0119213	0.00318886
2	Ig gamma-1 chain C region OS=Homo sapiens GN=IGHG1 PE=1 SV=1	IGHG1_HUMAN	36	8.31	Homo sapiens	0.0721767	0.0762075	0.0824366	0.081613	0.0845	0.119219	0.0897891	0.0924341	0.0860366	0.0941207	0.0336194	0.0464316	0.032587	0.0702498	0.0423178
3	Complement C3 OS=Homo sapiens GN=C3 PE=1 SV=2	CO3_HUMAN	187	6.34	Homo sapiens	0.00627134	0.0103023	0.00731545	0.00627408	0.00739542	0.00518599	0.00409411	0.00779223	0.0036346	0.00565178	0.0277771	0.0168113	0.0213185	0.0107292	0.0152273			5	0.00552484	0.00883312	0.00616159	0.00880029	0.00748975	0.00430024	0.00593357	0.00495627	0.00687479	0.00638455	0.00281177	0.00535202	0.0138489	0.0137269	0.00318886
4	Vitronectin OS=Homo sapiens GN=VTN PE=1 SV=1	VTNC_HUMAN	54	5.54	Homo sapiens	0.00421453	0.00320019	0.00254585	0.00269423	0.00146172	0	0.00484509	0.00302996	0.002595	0.00511911	0.0780435	0.0679082	0.103465	0.0614438	0.0596131			19	0.0246331	0.0353334	0.0205154	0.0269137	0.0328303	0.0150449	0.0137917	0.0175449	0.0189389	0.0232942	0.0552848	0.0532288	0.0566917	0.0570217	0.0336448
5	Ig kappa chain C region OS=Homo sapiens GN=IGKC PE=1 SV=1	IGKC_HUMAN	12	5.68	Homo sapiens	0.1228	0.110508	0.110407	0.142573	0.150165	0.174462	0.170815	0.187515	0.15239	0.161533	0.0527546	0.105394	0.0461547	0.0896769	0.0141744			36	0.0279387	0.0412339	0.0265887	0.0334448	0.0422075	0.0247904	0.0186183	0.0224131	0.0241163	0.0297449	0.0933808	0.0825192	0.0943991	0.0983008	0.0591623
6	Keratin, type II cytoskeletal 1 OS=Homo sapiens GN=KRT1 PE=1 SV=6	K2C1_HUMAN	66	8.33	Homo sapiens	0.0382572	0.0353776	0.0387383	0.0263221	0.0214348	0.0346164	0.019352	0.0326479	0.0257108	0.0272522	0.0134102	0.00954489	0.0121708	0.0125133	0.0337739			53	0.0338942	0.0519071	0.0325157	0.0436881	0.0595349	0.0303406	0.0240113	0.0289518	0.0364339	0.0410196	0.111727	0.101285	0.112584	0.117852	0.06855
7	Serum albumin OS=Homo sapiens GN=ALB PE=1 SV=2	ALBU_HUMAN	69	6.21	Homo sapiens	0.0273541	0.0194351	0.0286235	0.0202992	0.024971	0.0122392	0.0129671	0.0266855	0.0123503	0.0194759	0.0272017	0.0227248	0.0162281	0.0185506	0.026248			68	0.0406093	0.055068	0.0441674	0.048063	0.0649841	0.0371779	0.026437	0.0396018	0.0392695	0.0477637	0.159596	0.141699	0.152142	0.16244	0.0987695
8	Ig mu chain C region OS=Homo sapiens GN=IGHM PE=1 SV=3	IGHM_HUMAN	49	6.77	Homo sapiens	0.0450334	0.0405906	0.0421552	0.045298	0.0225802	0.0552891	0.0234233	0.0381505	0.0349585	0.0266199	0.0262649	0.0169327	0.0159783	0.0198028	0.0227851			88	0.185455	0.187792	0.214066	0.162776	0.183179	0.149	0.0995047	0.16215	0.158388	0.151469	0.303166	0.247621	0.256926	0.265058	0.340221
9	C4b-binding protein alpha chain OS=Homo sapiens GN=C4BPA PE=1 SV=2	C4BPA_HUMAN	67	7.31	Homo sapiens	0.0149464	0.0157649	0.009059	0.0162918	0.00577978	0.00694786	0.00194611	0.00467762	0.010235	0.0041025	0.0398818	0.0323008	0.0358158	0.029651	0.0799979			123	0.244678	0.273971	0.294814	0.22793	0.249768	0.22858	0.171518	0.231468	0.23932	0.213927	0.489761	0.398936	0.439466	0.400692	0.496853
10	Complement C4-A OS=Homo sapiens GN=C4A PE=1 SV=2	CO4A_HUMAN	193	7.08	Homo sapiens	0.00314811	0.00433894	0.0027299	0.00349025	0.00421796	0.00252338	0.00173925	0.0014119	0.00268927	0.00338076	0.0169592	0.0102119	0.0129401	0.0102967	0.0121391			143	0.363159	0.397212	0.409996	0.327362	0.353666	0.353213	0.261561	0.347173	0.328403	0.303324	0.593812	0.483347	0.547612	0.478169	0.538543
11	Ig gamma-2 chain C region OS=Homo sapiens GN=IGHG2 PE=1 SV=2	IGHG2_HUMAN	36	7.66	Homo sapiens	0.054136	0.0682942	0.0460949	0.0487566	0.0482819	0.075159	0.0750375	0.056458	0.0581686	0.0476679	0.0160562	0.0212536	0.0274758	0.0343009	0.00437034			172	0.545265	0.589841	0.582342	0.523311	0.550311	0.599124	0.495103	0.531858	0.540515	0.503548	0.719589	0.631287	0.696039	0.667133	0.678265
12	Keratin, type I cytoskeletal 9 OS=Homo sapiens GN=KRT9 PE=1 SV=3	K1C9_HUMAN	62	4.89	Homo sapiens	0.0230635	0.0239209	0.0253558	0.0162982	0.0161864	0.0194685	0.0127715	0.0196039	0.0189198	0.0183223	0.0119675	0.00607916	0.00981681	0.00840787	0.0276796			199	0.604556	0.669649	0.659812	0.587649	0.618001	0.664514	0.556394	0.599441	0.587752	0.565123	0.831912	0.729345	0.827336	0.762503	0.826704
13	Fibrinogen beta chain OS=Homo sapiens GN=FGB PE=1 SV=2	FIBB_HUMAN	56	8.38	Homo sapiens	0.00598646	0.0121104	0.00420342	0.011699	0.00973579	0.0139485	0.0225071	0.00805507	0.00996321	0.00935583	0.0293887	0.018681	0.0242469	0.0167461	0.0187735			264	1	1	1	1	1	1	1	1	1	1	1	1	1	1	1
14	Keratin, type I cytoskeletal 10 OS=Homo sapiens GN=KRT10 PE=1 SV=6	K1C10_HUMAN	59	4.88	Homo sapiens	0.0177916	0.0187513	0.021139	0.0121818	0.0100455	0.0243988	0.0105625	0.0157492	0.0141366	0.0156027	0.0103405	0.00664804	0.00570845	0.00749044	0.0223207
15	Complement factor H OS=Homo sapiens GN=CFH PE=1 SV=4	CFAH_HUMAN	139	6.59	Homo sapiens	0.0025152	0.00442445	0.00447761	0.00386462	0.00255833	0.00941294	0.0048266	0.00402419	0.00231346	0.0035641	0.00730152	0.00481194	0.00663874	0.00537121	0.00336468
16	Apolipoprotein D OS=Homo sapiens GN=APOD PE=1 SV=1	APOD_HUMAN	21	4.79	Homo sapiens	0.0187426	0.023352	0.0261186	0.0212012	0.0214581	0.0231117	0.0252692	0.0181367	0.0130225	0.0211847	0.0462653	0.0239299	0.0692926	0.0219876	0.109065
17	Filamin-A OS=Homo sapiens GN=FLNA PE=1 SV=4	FLNA_HUMAN	281	5.95	Homo sapiens	0.00238013	0.002025	0.00201103	0.00249359	0.00371189	0.0018822	0.000532894	0.00184516	0.00241583	0.00249459	0	0.00189447	0	0.00220671	0
18	Fibrinogen gamma chain OS=Homo sapiens GN=FGG PE=1 SV=3	FIBG_HUMAN	52	5.32	Homo sapiens	0.00643202	0.0106547	0.00491843	0.00576478	0.00805694	0.0130258	0.0155929	0.00760079	0.00765064	0.00609687	0.0170151	0.0128723	0.0112913	0.00951797	0.0118185
19	Prothrombin OS=Homo sapiens GN=F2 PE=1 SV=2	THRB_HUMAN	70	5.7	Homo sapiens	0	0	0	0	0	0	0	0	0	0.000575807	0.0216673	0.017732	0.0207878	0.0231112	0.0150898					CHOL					DOPG					DOTAP
20	Alpha-2-macroglobulin OS=Homo sapiens GN=A2M PE=1 SV=3	A2MG_HUMAN	163	6.43	Homo sapiens	0.00457651	0.0071727	0.000468399	0.00318339	0.00625332	0	0.000116255	0	0.000469632	0.00321945	0.00395422	0.00422494	0.00379497	0.00226767	0.0026425				N° prot	CHOL_A	CHOL_B	CHOL_C	CHOL_D	CHOL_E	DOPG_A	DOPG_B	DOPG_C	DOPG_D	DOPG_E	DOTAP_A	DOTAP_B	DOTAP_C	DOTAP_D	DOTAP_E
21	Immunoglobulin lambda-like polypeptide 5 OS=Homo sapiens GN=IGLL5 PE=2 SV=2	IGLL5_HUMAN	23	9.05	Homo sapiens	0.017829	0.0288192	0.0271136	0.0265012	0.0268052	0.0247908	0.0292077	0.0338139	0.0227947	0.0296142	0.00995434	0.0144448	0.0118092	0.0163403	0			>300	5	0.00552484	0.00883312	0.00616159	0.00880029	0.00748975	0.00430024	0.00593357	0.00495627	0.00687479	0.00638455	0.00281177	0.00535202	0.0138489	0.0137269	0.00318886
22	Keratin, type II cytoskeletal 6A OS=Homo sapiens GN=KRT6A PE=1 SV=3	K2C6A_HUMAN	60	8.16	Homo sapiens	0.00987966	0.00999427	0.0185603	0.00970846	0.0123792	0.0094906	0.00761734	0.0108989	0.013749	0.01023	0.00399592	0.000981373	0.00146405	0.00340973	0.0107945			150-300	14	0.0191083	0.0265003	0.0143538	0.0181134	0.0253405	0.0107447	0.0078581	0.0125886	0.0120641	0.0169096	0.052473	0.0478768	0.0428428	0.0432948	0.0304559
23	Hyaluronan-binding protein 2 OS=Homo sapiens GN=HABP2 PE=1 SV=1	HABP2_HUMAN	63	6.52	Homo sapiens	0	0	0	0	0	0	0	0	0	0	0.0238902	0.0171951	0.0119139	0.0137231	0.0205004			100-150	17	0.00330556	0.00590044	0.00607335	0.00653115	0.00937718	0.00974553	0.0048266	0.00486821	0.00517743	0.00645077	0.0380961	0.0292903	0.0377074	0.0412791	0.0255176
24	Keratin, type I cytoskeletal 16 OS=Homo sapiens GN=KRT16 PE=1 SV=4	K1C16_HUMAN	51	4.69	Homo sapiens	0.0116491	0.0155072	0.0217844	0.0116025	0.0150311	0.013685	0.00803315	0.0109358	0.0211283	0.00871724	0.00277379	0.00213587	0	0.00323478	0.0102853			80-100	17	0.00595556	0.0106732	0.005927	0.0102432	0.0173274	0.00555013	0.00539307	0.00653871	0.0123176	0.0112746	0.0183463	0.0187655	0.0181851	0.0195509	0.00938773
25	Keratin, type II cytoskeletal 2 epidermal OS=Homo sapiens GN=KRT2 PE=1 SV=2	K22E_HUMAN	65	8.17	Homo sapiens	0.0180337	0.0162788	0.0177199	0.0103598	0.0100904	0.0198256	0.00973953	0.0173915	0.0086278	0.0138699	0.00554323	0.00360571	0.00251075	0.00345756	0.0230974			70-80	15	0.0067151	0.00316094	0.0116517	0.00437495	0.00544925	0.00683738	0.00242571	0.01065	0.00283568	0.0067441	0.0478692	0.0404145	0.0395574	0.0445882	0.0302194
26	Ig lambda-2 chain C regions OS=Homo sapiens GN=IGLC2 PE=1 SV=1	LAC2_HUMAN	11	7.34	Homo sapiens	0.0691221	0.0817501	0.0850395	0.0603536	0.0610605	0.0998485	0.0762896	0.0892488	0.0559596	0.069134	0.0516458	0.0372257	0.0513382	0.0262	0.0740996			60-70	20	0.144846	0.132724	0.169899	0.114713	0.118195	0.111822	0.0730677	0.122548	0.119118	0.103705	0.14357	0.105922	0.104784	0.102618	0.241452
27	Thrombospondin-1 OS=Homo sapiens GN=THBS1 PE=1 SV=2	TSP1_HUMAN	129	4.51	Homo sapiens	0.000476434	0.000857057	0.00121346	0	0.00238795	0.000332593	0	0.00084402	0.000592028	0.00192183	0.00490579	0.00671447	0.00100526	0.00849992	0.0104784			50-60	35	0.0592231	0.086179	0.080748	0.0651538	0.0665892	0.0795799	0.0720134	0.0693175	0.0809323	0.0624577	0.186595	0.151315	0.18254	0.135634	0.156632
28	Apolipoprotein(a) OS=Homo sapiens GN=LPA PE=1 SV=1	APOA_HUMAN	501	5.77	Homo sapiens	0.000122675	0.00261628	0.000467342	0.00123414	0.000535962	0	0.000856375	0.000408164	0.000919916	0.000551164	0	0.000151114	0.00110643	0.00180558	0			40-50	20	0.118481	0.123241	0.115182	0.099432	0.103898	0.124634	0.0900428	0.115705	0.0890828	0.0893972	0.104051	0.0844108	0.108147	0.0774774	0.0416894
29	CD5 antigen-like OS=Homo sapiens GN=CD5L PE=1 SV=1	CD5L_HUMAN	38	5.15	Homo sapiens	0.0148317	0.0149838	0.0154056	0.0110184	0.00935998	0.0183441	0.00932095	0.0132655	0.013082	0.0101385	0.0106008	0.00602991	0.00344309	0.007982	0.0160712			30-40	29	0.182106	0.192629	0.172347	0.19595	0.196645	0.245911	0.233542	0.184686	0.212112	0.200224	0.125777	0.14794	0.148426	0.188964	0.139723
30	Haptoglobin OS=Homo sapiens GN=HP PE=1 SV=1	HPT_HUMAN	45	6.56	Homo sapiens	0.0104931	0.00737989	0.00825751	0.0066564	0.00930106	0	0.00144428	0.00664652	0.00403203	0.00591569	0.010422	0.012966	0.0122976	0.00924142	0			20-30	27	0.0592905	0.0798077	0.0774698	0.0643379	0.0676904	0.0653893	0.0612911	0.0675821	0.0472372	0.0615751	0.112323	0.0980584	0.131297	0.09537	0.148438
31	Serotransferrin OS=Homo sapiens GN=TF PE=1 SV=3	TRFE_HUMAN	77	7.13	Homo sapiens	0.0067151	0.00204504	0.0116517	0.00437495	0.00523392	0.00683738	0.00206221	0.00619628	0.00263115	0.00616829	0.00694767	0.00626597	0	0.00283453	0.00299752			<20	65	0.395444	0.330351	0.340188	0.412351	0.381999	0.335486	0.443606	0.400559	0.412248	0.434877	0.168088	0.270655	0.172664	0.237497	0.173296
32	Plasminogen OS=Homo sapiens GN=PLG PE=1 SV=2	PLMN_HUMAN	91	7.25	Homo sapiens	0.000330413	0.00433801	0	0.00370407	0.00381939	0.00047031	0.00287015	0.000892412	0.00237914	0.0013255	0.006114	0.0049374	0.00381538	0.00580203	0.00224513			tot	264	1	1	1	1	1	1	1	1	1	1	1	1	1	1	1
33	Inter-alpha-trypsin inhibitor heavy chain H2 OS=Homo sapiens GN=ITIH2 PE=1 SV=2	ITIH2_HUMAN	106	6.85	Homo sapiens	0	0	0	0	0.000222445	0	0	0	0	0	0.00915975	0.00485943	0.00952548	0.00859635	0.00500589
34	Apolipoprotein A-I OS=Homo sapiens GN=APOA1 PE=1 SV=1	APOA1_HUMAN	31	5.5	Homo sapiens	0.00738786	0.00558788	0.006281	0.00410418	0.00356749	0.00132856	0	0.00483273	0.00270688	0	0.0207663	0.0141481	0.0287233	0.0136172	0.0207152
35	Integrin beta-3 OS=Homo sapiens GN=ITGB3 PE=1 SV=2	ITB3_HUMAN	87	4.85	Homo sapiens	0.00245965	0.0023599	0.00225246	0.00386872	0.00763223	0.00170506	0.00075196	0.00218565	0.00442702	0.00569781	0	0.0037629	0	0.00287632	0
36	Fibrinogen alpha chain OS=Homo sapiens GN=FGA PE=1 SV=2	FIBA_HUMAN	95	5.87	Homo sapiens	0.00192905	0.00397531	0.000830052	0.000764271	0.00133058	0.00290675	0.00177096	0.00274035	0.00395823	0.00104108	0.00356031	0.0028109	0.00766475	0.00291458	0.00339432
37	Inter-alpha-trypsin inhibitor heavy chain H1 OS=Homo sapiens GN=ITIH1 PE=1 SV=3	ITIH1_HUMAN	101	6.78	Homo sapiens	0	0	0	0	0.000156561	0	0	0	0	0	0.00626787	0.00308253	0.00817295	0.00862	0.00291931
38	Hornerin OS=Homo sapiens GN=HRNR PE=1 SV=2	HORN_HUMAN	282	10.24	Homo sapiens	0.00140123	0.00162098	0.00152093	0.0010029	0.00162524	0.000146047	0.00079364	0.0011584	0.00141178	0.00122686	0	0.000122646	7.70533e-05	0.000351872	0
39	Ig alpha-1 chain C region OS=Homo sapiens GN=IGHA1 PE=1 SV=2	IGHA1_HUMAN	38	6.49	Homo sapiens	0.00478777	0.00663734	0.00616224	0.00503516	0.00686005	0.0061364	0.00514288	0.00427585	0.0047672	0.00440272	0.00575365	0.0077479	0.00773169	0.00625342	0.00665585
40	Beta-2-glycoprotein 1 OS=Homo sapiens GN=APOH PE=1 SV=3	APOH_HUMAN	38	8.03	Homo sapiens	0.00679474	0.0062213	0.00713456	0.00598444	0.0174631	0.00778336	0.0127185	0.00571635	0.00421044	0.0192588	0	0.00167618	0	0.00121848	0
41	Apolipoprotein E OS=Homo sapiens GN=APOE PE=1 SV=1	APOE_HUMAN	36	5.42	Homo sapiens	0.00634019	0	0.00378323	0.00100072	0.00439033	0	0	0	0.00174819	0	0.0139468	0.0119364	0.0211447	0.014484	0.0153994
42	Serum paraoxonase/arylesterase 1 OS=Homo sapiens GN=PON1 PE=1 SV=3	PON1_HUMAN	40	4.89	Homo sapiens	0	0	0	0.000450325	0.000790013	0	0	0	0	0.00148293	0.0190873	0.0129883	0.0181922	0.0123787	0.0123825
43	Vitamin K-dependent protein S OS=Homo sapiens GN=PROS1 PE=1 SV=1	PROS_HUMAN	75	5.37	Homo sapiens	0	0	0	0	0	0	0	0	0	0	0.00713295	0.00750223	0.00694399	0.00818415	0.00706021
44	Keratin, type II cytoskeletal 5 OS=Homo sapiens GN=KRT5 PE=1 SV=3	K2C5_HUMAN	62	7.91	Homo sapiens	0.0100441	0.00942356	0.0126239	0.00645498	0.00777535	0.00852017	0.00585224	0.00724808	0.00971447	0.0074937	0.00421622	0.00191608	0.00280374	0.00276432	0.0128595
45	Keratin, type I cytoskeletal 14 OS=Homo sapiens GN=KRT14 PE=1 SV=4	K1C14_HUMAN	52	4.81	Homo sapiens	0.011121	0.013961	0.0206544	0.0108497	0.00957225	0.0113922	0.00663657	0.00891829	0.0162933	0.00759979	0.00312026	0.00320832	0	0.00443289	0.0152796
46	Ceruloplasmin OS=Homo sapiens GN=CP PE=1 SV=1	CERU_HUMAN	122	5.5	Homo sapiens	0	0	0	0	0.000128848	0	0	0	0	0	0.00438618	0.00373948	0.00685708	0.00335089	0
47	Complement C5 OS=Homo sapiens GN=C5 PE=1 SV=4	CO5_HUMAN	188	6.49	Homo sapiens	0	0.000172592	0	0.000191792	0.000420285	0	0.000247438	0	7.14719e-05	0	0.00261298	0.00201577	0.00306779	0.00189452	0
48	Fibronectin OS=Homo sapiens GN=FN1 PE=1 SV=4	FINC_HUMAN	263	5.45	Homo sapiens	0.000119363	0.000360269	0	0.000898917	0.000781236	0	0	0	0.000562583	0.000228749	0.000954187	0.00076534	0.000910577	0.00138025	0
49	Clusterin OS=Homo sapiens GN=CLU PE=1 SV=1	CLUS_HUMAN	52	6.21	Homo sapiens	0	0	0	0	0	0	0	0	0	0	0.00672048	0.00456826	0.0142341	0.00596301	0.0045128
50	Ig kappa chain V-III region HAH OS=Homo sapiens PE=2 SV=1	KV312_HUMAN	14	4.59	Homo sapiens	0.00322153	0.00792674	0.00273055	0.0188365	0.0124165	0.0135951	0.0199823	0.010701	0.0179814	0.0148293	0	0.00503063	0.00460654	0.00713841	0
51	Complement C1q subcomponent subunit C OS=Homo sapiens GN=C1QC PE=1 SV=3	C1QC_HUMAN	26	8.58	Homo sapiens	0.00526724	0.00973464	0.0104756	0.00805189	0.00637764	0.0081435	0.0054123	0.00523122	0.00536481	0.00494467	0.00714435	0.003904	0.0083662	0.00533153	0
52	Apolipoprotein C-III OS=Homo sapiens GN=APOC3 PE=1 SV=1	APOC3_HUMAN	11	5.04	Homo sapiens	0.0110831	0.00287448	0.0141167	0.00416797	0.00646543	0	0	0	0.00133876	0	0.0159138	0.0384421	0.0285795	0.0156002	0.0294153
53	Immunoglobulin J chain OS=Homo sapiens GN=IGJ PE=1 SV=4	IGJ_HUMAN	18	4.87	Homo sapiens	0.0135156	0.0105509	0.0118777	0.00908513	0.00658706	0.0117628	0.00571358	0.00829326	0.00815823	0.00933466	0.0078981	0.00534581	0	0.00658907	0
54	Coagulation factor V OS=Homo sapiens GN=F5 PE=1 SV=4	FA5_HUMAN	252	5.95	Homo sapiens	0.000843455	0.000125473	0	0.000505855	0.000627141	0.00100705	0.00033452	0.000269613	0.000497633	0.000627368	0.000215275	0.000438032	0.000733841	0.000444923	0.000447049
55	Actin, cytoplasmic 2 OS=Homo sapiens GN=ACTG1 PE=1 SV=1	ACTG_HUMAN	42	5.16	Homo sapiens	0.00796345	0.00225597	0	0.00390022	0.00282273	0	0	0.00582922	0.00233746	0.00282462	0	0.00434291	0.00102367	0.00439782	0.00402344
56	Ig gamma-3 chain C region OS=Homo sapiens GN=IGHG3 PE=1 SV=2	IGHG3_HUMAN	41	7.95	Homo sapiens	0.0437759	0.0557823	0.0504684	0.0325861	0.0352671	0.0603846	0.0624776	0.0498826	0.0312387	0.0370611	0.0194213	0.0203659	0.0262111	0.0219017	0
57	Inter-alpha-trypsin inhibitor heavy chain H3 OS=Homo sapiens GN=ITIH3 PE=1 SV=2	ITIH3_HUMAN	100	5.49	Homo sapiens	0	0	0	0	0	0	0	0	0	0	0.00370478	0.00308023	0.00467404	0.00322969	0.00374932
58	Ig heavy chain V-III region TRO OS=Homo sapiens PE=1 SV=1	HV301_HUMAN	13	10	Homo sapiens	0.00706513	0	0	0.0119185	0.010328	0	0.0150952	0.00510265	0.0161234	0.023467	0	0.00368815	0	0.00252589	0
59	Alpha-1-antitrypsin OS=Homo sapiens GN=SERPINA1 PE=1 SV=3	A1AT_HUMAN	47	5.31	Homo sapiens	0	0	0	0.000974825	0.0025227	0	0	0.00203429	0	0	0.00465189	0.0042836	0.0161811	0.00407244	0.00122205
60	Histidine-rich glycoprotein OS=Homo sapiens GN=HRG PE=1 SV=1	HRG_HUMAN	60	7.52	Homo sapiens	0.0017703	0.00130789	0	0	0.00223946	0.000713303	0.000301566	0	0.000568784	0.00261795	0.00290689	0.00281108	0.00580211	0.00528076	0.00233777
61	Ig heavy chain V-III region TUR OS=Homo sapiens PE=1 SV=1	HV318_HUMAN	12	10.12	Homo sapiens	0	0	0	0.0136469	0.00658344	0	0.0154348	0.0103627	0.0122522	0	0	0.00674151	0	0.00220791	0
62	Protein AMBP OS=Homo sapiens GN=AMBP PE=1 SV=1	AMBP_HUMAN	39	6.15	Homo sapiens	0	0	0	0	0	0	0.000484672	0	0	0	0.0106271	0.0061771	0.00416676	0.0120019	0
63	Cartilage oligomeric matrix protein OS=Homo sapiens GN=COMP PE=1 SV=2	COMP_HUMAN	83	4.16	Homo sapiens	0	0	0	0	0	0	0	0	0	0	0.00578962	0.00364859	0.00156518	0.00485843	0.00173001
64	Complement C1s subcomponent OS=Homo sapiens GN=C1S PE=1 SV=1	C1S_HUMAN	77	4.59	Homo sapiens	0	0	0	0	0	0	0	0	0	0	0.00623434	0.00386982	0.00338934	0.00403252	0
65	Coagulation factor IX OS=Homo sapiens GN=F9 PE=1 SV=2	FA9_HUMAN	52	5.16	Homo sapiens	0	0	0	0	0	0	0	0	0	0	0.00840567	0.00579402	0.00543669	0.00470138	0.00231479
66	Apolipoprotein A-IV OS=Homo sapiens GN=APOA4 PE=1 SV=3	APOA4_HUMAN	45	5.05	Homo sapiens	0	0	0	0	0	0	0	0	0	0	0.0140537	0.00543251	0.00724298	0.00263249	0.00127636
67	Platelet factor 4 OS=Homo sapiens GN=PF4 PE=1 SV=2	PLF4_HUMAN	11	8.78	Homo sapiens	0.00681274	0	0.00520562	0.0123851	0.00718729	0	0	0.011107	0.0158839	0.0188353	0	0.0104683	0	0.00539417	0
68	Myosin-9 OS=Homo sapiens GN=MYH9 PE=1 SV=4	MYH9_HUMAN	227	5.29	Homo sapiens	0	0	0	0	6.92486e-05	0	0	0	0	0	0	0.00105533	0	0.00291083	0
69	Ficolin-3 OS=Homo sapiens GN=FCN3 PE=1 SV=2	FCN3_HUMAN	33	6.66	unknown	0	0.00191308	0	0.00193517	0.00191556	0	0	0	0.0038001	0.00210737	0.00330087	0.0034908	0.00756518	0.00619523	0.014206
70	Platelet glycoprotein 4 OS=Homo sapiens GN=CD36 PE=1 SV=2	CD36_HUMAN	53	8.06	Homo sapiens	0.00144328	0	0.00220911	0.00291993	0.00462364	0	0	0	0.00290628	0.00373782	0	0.00165682	0	0.00161687	0.00118741
71	C4b-binding protein beta chain OS=Homo sapiens GN=C4BPB PE=1 SV=1	C4BPB_HUMAN	28	4.8	Homo sapiens	0	0.00228809	0	0	0	0	0	0	0	0	0.00972323	0.00792466	0.00700086	0.00826045	0.0105304
72	Properdin OS=Homo sapiens GN=CFP PE=1 SV=2	PROP_HUMAN	51	7.92	Homo sapiens	0.000585073	0.00247679	0	0.00392377	0.00201528	0	0.00237134	0.0013217	0.00260541	0.00114309	0	0.00216352	0	0.00052236	0
73	Kininogen-1 OS=Homo sapiens GN=KNG1 PE=1 SV=2	KNG1_HUMAN	72	6.8	Homo sapiens	0	0	0	0	0	0	0	0	0	0	0.00408738	0.00303642	0.00513688	0.00357355	0
74	Ig heavy chain V-III region GAL OS=Homo sapiens PE=1 SV=1	HV320_HUMAN	13	8.7	Homo sapiens	0.00938683	0.00853649	0.00900635	0.0125983	0.00608156	0	0.0129416	0.00837771	0.0113319	0.0121383	0	0.00635207	0	0.00661915	0
75	Erythrocyte band 7 integral membrane protein OS=Homo sapiens GN=STOM PE=1 SV=3	STOM_HUMAN	32	8.07	Homo sapiens	0.00334359	0.00296096	0.00298487	0.00626839	0.00592557	0.00594787	0.000590694	0.00165836	0.00742682	0.00461162	0	0.000426489	0	0	0
76	Ig kappa chain V-I region EU OS=Homo sapiens PE=1 SV=1	KV106_HUMAN	12	8.46	unknown	0.00760823	0.0157918	0.00975688	0.00912445	0.0138327	0.00700748	0.0124469	0.00331672	0.0062477	0.0140123	0	0.00171716	0	0.00439873	0
77	Ig heavy chain V-III region 23 OS=Homo sapiens GN=IGHV3-23 PE=1 SV=2	HV303_HUMAN	13	8.46	Homo sapiens	0.0103728	0.0181216	0.0134131	0.0195702	0.0115425	0.014707	0.0194042	0.00931578	0.0161234	0.0159375	0.0108978	0.00322132	0	0.0101536	0
78	Tropomyosin alpha-4 chain OS=Homo sapiens GN=TPM4 PE=1 SV=3	TPM4_HUMAN	29	4.36	Homo sapiens	0	0	0	0	0	0	0	0	0	0	0.00188772	0.0137204	0.00746876	0.00569377	0
79	Complement component C9 OS=Homo sapiens GN=C9 PE=1 SV=2	CO9_HUMAN	63	5.27	Homo sapiens	0	0	0	0	0	0	0	0	0	0	0.00554707	0.00412892	0.00397375	0.00114879	0.00416311
80	Keratin, type I cytoskeletal 17 OS=Homo sapiens GN=KRT17 PE=1 SV=2	K1C17_HUMAN	48	4.67	Homo sapiens	0.00855688	0.00952214	0.0113736	0.00682378	0.00658427	0.00793049	0.00269764	0.00540127	0.00961134	0.0078257	0	0	0	0	0
81	Complement C1q subcomponent subunit B OS=Homo sapiens GN=C1QB PE=1 SV=3	C1QB_HUMAN	27	8.87	Homo sapiens	0.00449081	0.00640038	0.00212081	0.0057135	0.00380491	0	0.000701836	0.0014741	0.00233092	0.00329539	0.00363805	0.00369889	0.00362149	0.00293375	0
82	Apolipoprotein M OS=Homo sapiens GN=APOM PE=1 SV=2	APOM_HUMAN	21	5.92	Homo sapiens	0.00142089	0	0	0	0.00112947	0	0	0	0	0	0.00831906	0.00696105	0.010325	0.00755066	0
83	Heparin cofactor 2 OS=Homo sapiens GN=SERPIND1 PE=1 SV=3	HEP2_HUMAN	57	6.89	Homo sapiens	0	0	0	0	0	0	0	0	0	0	0.00518538	0.00328447	0.00306188	0.0024332	0
84	Haptoglobin-related protein OS=Homo sapiens GN=HPR PE=2 SV=2	HPTR_HUMAN	39	7.11	Homo sapiens	0.00819348	0.0052524	0	0.0065238	0.0064823	0.00325354	0.00335429	0	0.00484115	0.0060838	0.00284413	0.00523389	0	0.00101904	0
85	Integrin alpha-IIb OS=Homo sapiens GN=ITGA2B PE=1 SV=3	ITA2B_HUMAN	113	5.03	Homo sapiens	0	0	0	0.00120563	0.00216891	0	0	0	0.00086721	0.000428055	0	0.000776697	0	0.000466479	0
86	Integrin beta-1 OS=Homo sapiens GN=ITGB1 PE=1 SV=2	ITB1_HUMAN	88	5.04	Homo sapiens	0.000874175	0	0.00154769	0.000620373	0.00251463	0.000468014	0	0.000452281	0.000793542	0.002243	0	0.000118969	0	0	0
87	Desmoplakin OS=Homo sapiens GN=DSP PE=1 SV=3	DESP_HUMAN	332	6.78	Homo sapiens	9.45555e-05	0	0.000295247	0.000411137	0.000190299	0	0	7.99211e-05	0.000613583	0.000212909	0	0	0	0	0
88	Apolipoprotein C-II OS=Homo sapiens GN=APOC2 PE=1 SV=1	APOC2_HUMAN	11	4.36	Homo sapiens	0.00692277	0	0.0106439	0	0.00646854	0	0	0	0	0	0.0119063	0.0064067	0.0148152	0.0113975	0.0132512
89	Ig kappa chain V-II region RPMI 6410 OS=Homo sapiens PE=4 SV=1	KV206_HUMAN	15	9.53	Homo sapiens	0	0.00409123	0.00636596	0.00667861	0.00158811	0	0.00430275	0	0.00744066	0.00403065	0	0	0	0	0
90	HLA class I histocompatibility antigen, B-7 alpha chain OS=Homo sapiens GN=HLA-B PE=1 SV=3	1B07_HUMAN	40	5.65	unknown	0.00265831	0.00200725	0.00292706	0.00113888	0.00612515	0.00102963	0	0	0.00155279	0.005691	0	0	0	0.000999014	0
91	Coagulation factor X OS=Homo sapiens GN=F10 PE=1 SV=2	FA10_HUMAN	55	5.74	Homo sapiens	0	0	0	0	0	0	0	0	0	0	0.00655109	0.00254065	0.00196271	0.00227942	0.00690721
92	C-reactive protein OS=Homo sapiens GN=CRP PE=1 SV=1	CRP_HUMAN	25	5.32	Homo sapiens	0	0	0	0	0	0	0	0	0	0	0.00696092	0.00570146	0	0.0095081	0.0163003
93	Alpha-1-antichymotrypsin OS=Homo sapiens GN=SERPINA3 PE=1 SV=2	AACT_HUMAN	48	5.19	Homo sapiens	0	0	0	0	0	0	0	0	0	0	0.00547633	0.00193846	0.00907787	0.000951266	0
94	Ig kappa chain V-IV region (Fragment) OS=Homo sapiens GN=IGKV4-1 PE=4 SV=1	KV401_HUMAN	13	4.85	Homo sapiens	0.00938683	0.0109328	0	0.00558625	0.00547433	0.00646844	0.00930296	0.00731352	0.00545715	0.00760791	0	0.00529536	0	0.00202755	0
95	Dermcidin OS=Homo sapiens GN=DCD PE=1 SV=2	DCD_HUMAN	11	6.52	Homo sapiens	0.0165998	0.0143578	0.0142282	0.00826606	0.00431028	0	0.00257757	0.005025	0.00567896	0.00715905	0.00194573	0	0	0.0023962	0
96	Complement C1r subcomponent OS=Homo sapiens GN=C1R PE=1 SV=2	C1R_HUMAN	80	6.14	Homo sapiens	0	0	0	0	0.000989263	0	0	0	0	0.000493283	0.00191263	0.00148496	0.00162967	0.00173008	0
97	Vitamin K-dependent protein C OS=Homo sapiens GN=PROC PE=1 SV=1	PROC_HUMAN	52	6.23	Homo sapiens	0	0	0	0	0	0	0	0	0	0	0.00378548	0.00254788	0.00230717	0.00228766	0
98	Ig heavy chain V-II region ARH-77 OS=Homo sapiens PE=4 SV=1	HV209_HUMAN	16	8.45	Homo sapiens	0.00570617	0.00592192	0	0.00568098	0.00393859	0	0.00524491	0.00345469	0.00479553	0.00364359	0	0	0	0	0
99	Complement C1q subcomponent subunit A OS=Homo sapiens GN=C1QA PE=1 SV=2	C1QA_HUMAN	26	9.45	Homo sapiens	0.00351149	0.00607445	0.00597245	0.00140692	0.00243128	0.00165017	0	0.00208229	0.00213737	0.00109676	0	0	0	0.000498666	0
100	Ig heavy chain V-I region HG3 OS=Homo sapiens PE=3 SV=1	HV102_HUMAN	13	9.4	Homo sapiens	0.0105345	0	0	0.008419	0	0	0	0	0.00418927	0	0	0	0	0	0
101	Ig alpha-2 chain C region OS=Homo sapiens GN=IGHA2 PE=1 SV=3	IGHA2_HUMAN	37	6.02	Homo sapiens	0	0	0.00206349	0.00615283	0	0	0	0	0.00562717	0	0	0.00212215	0	0.00301896	0
102	Thrombospondin-4 OS=Homo sapiens GN=THBS4 PE=1 SV=2	TSP4_HUMAN	106	4.23	Homo sapiens	0	0	0	0	0	0	0	0	0	0	0.00237017	0.00155721	0.000200616	0.0021175	0
103	Protein Z-dependent protease inhibitor OS=Homo sapiens GN=SERPINA10 PE=1 SV=1	ZPI_HUMAN	51	8.58	Homo sapiens	0	0	0	0	0	0	0	0	0	0	0.00492904	0.00300187	0.00233423	0.000259755	0.00236018
104	Complement factor H-related protein 1 OS=Homo sapiens GN=CFHR1 PE=1 SV=2	FHR1_HUMAN	38	7.42	Homo sapiens	0.00319084	0.00457084	0	0	0.00165958	0.00500733	0.00243396	0	0	0.00416368	0.00402009	0	0	0	0
105	Ig kappa chain V-III region VG (Fragment) OS=Homo sapiens PE=1 SV=1	KV309_HUMAN	13	4.59	Homo sapiens	0	0	0	0.00208199	0	0	0	0	0.00645486	0.00229089	0	0.00238006	0	0.00202755	0
106	Transthyretin OS=Homo sapiens GN=TTR PE=1 SV=1	TTHY_HUMAN	16	5.58	Homo sapiens	0	0	0	0	0	0	0	0	0	0	0.0102166	0.00548823	0.0169902	0.00702972	0.0162205
107	Complement component C8 alpha chain OS=Homo sapiens GN=C8A PE=1 SV=2	CO8A_HUMAN	65	6.41	Homo sapiens	0	0	0	0	0.000485109	0	0	0	0	0	0.00285393	0.00236112	0.000334293	0.00173039	0
108	Vitamin D-binding protein OS=Homo sapiens GN=GC PE=1 SV=1	VTDB_HUMAN	53	5.21	Homo sapiens	0	0	0	0	0.00208817	0	0	0	0	0	0.00102432	0.00228025	0	0.00161953	0
109	Serum amyloid P-component OS=Homo sapiens GN=APCS PE=1 SV=2	SAMP_HUMAN	25	6.52	Homo sapiens	0	0.00313894	0.00381958	0	0	0.00335934	0	0.00110423	0	0	0.00348541	0.00178891	0.00347663	0.00158423	0.010491
110	Platelet glycoprotein IX OS=Homo sapiens GN=GP9 PE=1 SV=3	GPIX_HUMAN	19	6.32	Homo sapiens	0.0072078	0.00662645	0.00616224	0.00620769	0.00707261	0	0	0	0.00441649	0	0	0	0	0.000704889	0
111	Ig kappa chain V-III region CLL OS=Homo sapiens PE=4 SV=2	KV308_HUMAN	14	8.7	unknown	0.00214769	0.00450939	0	0.00520591	0.0067642	0	0.00396895	0.00197185	0.00502129	0.00915281	0	0	0	0.00188273	0
112	Ig heavy chain V-III region WEA OS=Homo sapiens PE=1 SV=1	HV302_HUMAN	12	8.7	Homo sapiens	0	0	0	0.00375271	0	0	0	0	0.0116626	0	0	0	0	0	0
113	Ig lambda chain V-III region LOI OS=Homo sapiens PE=1 SV=1	LV302_HUMAN	12	4.72	Homo sapiens	0	0.0105653	0	0.00375658	0.00394151	0	0.0101139	0.00230049	0.00167959	0.00991108	0	0.00200974	0	0.00273674	0
114	Phosphatidylcholine-sterol acyltransferase OS=Homo sapiens GN=LCAT PE=1 SV=1	LCAT_HUMAN	50	6.04	Homo sapiens	0	0	0	0	0	0	0	0	0	0	0.00458394	0.00234416	0.00305596	0.00158141	0
115	Ig heavy chain V-I region V35 OS=Homo sapiens PE=1 SV=1	HV103_HUMAN	13	9.87	Homo sapiens	0	0	0	0.00911181	0	0	0	0.0021284	0.00545715	0.00375324	0	0	0	0.000997331	0
116	Ficolin-2 OS=Homo sapiens GN=FCN2 PE=1 SV=2	FCN2_HUMAN	34	6.77	unknown	0.000923307	0	0	0.00134123	0.00185958	0.003732	0	0	0.00205387	0.00493309	0	0	0	0	0.00940329
117	Hemoglobin subunit beta OS=Homo sapiens GN=HBB PE=1 SV=2	HBB_HUMAN	16	7.32	Homo sapiens	0	0	0	0.00568195	0.00494126	0	0	0	0	0.00251916	0	0.00397532	0.00138703	0.00455009	0
118	Ig heavy chain V-III region CAM OS=Homo sapiens PE=1 SV=1	HV307_HUMAN	14	6.5	unknown	0	0	0	0	0	0	0.00338385	0	0.0041409	0	0	0	0	0.00285433	0
119	Ig gamma-4 chain C region OS=Homo sapiens GN=IGHG4 PE=1 SV=1	IGHG4_HUMAN	36	7.41	Homo sapiens	0	0	0	0.0152142	0	0	0.0346692	0	0.0151131	0	0	0.0134917	0.0108838	0.0161403	0
120	Heat shock 70 kDa protein 1-like OS=Homo sapiens GN=HSPA1L PE=1 SV=2	HS71L_HUMAN	70	5.82	unknown	0	0.0011159	0	0	0	0	0	0.00409044	0	0	0	0	0.000465622	0	0.00507193
121	Lysozyme C OS=Homo sapiens GN=LYZ PE=1 SV=1	LYSC_HUMAN	17	9.35	Homo sapiens	0.00624813	0.00376862	0	0.00215175	0	0	0.00217903	0.00318841	0.00330686	0.00120306	0	0	0	0	0
122	Ig lambda chain V-III region SH OS=Homo sapiens PE=1 SV=1	LV301_HUMAN	11	6.5	Homo sapiens	0.00428079	0.00582423	0	0.00163754	0.00287502	0	0.00336329	0.00869197	0	0.00345647	0	0	0	0	0
123	Apolipoprotein A-II OS=Homo sapiens GN=APOA2 PE=1 SV=1	APOA2_HUMAN	11	6.6	Homo sapiens	0.00285386	0	0	0	0.00359464	0	0	0	0	0	0.00490929	0.00889216	0.00592608	0.0066117	0
124	Ig lambda chain V-I region WAH OS=Homo sapiens PE=1 SV=1	LV106_HUMAN	12	6.46	unknown	0	0.00526096	0	0.00304832	0.00131772	0	0.00315431	0.00221115	0.00520571	0.00158421	0	0.0011373	0	0	0
125	Ig heavy chain V-III region GA OS=Homo sapiens PE=1 SV=1	HV308_HUMAN	13	10.02	Homo sapiens	0	0.00243225	0	0	0.00120919	0	0.00145766	0	0	0.00152726	0	0	0	0	0
126	Complement component C8 beta chain OS=Homo sapiens GN=C8B PE=1 SV=3	CO8B_HUMAN	67	8.17	Homo sapiens	0	0	0	0	0	0	0	0	0	0	0.000977386	0.0020312	0.00145941	0.00157777	0
127	Small proline-rich protein 2A OS=Homo sapiens GN=SPRR2A PE=1 SV=1	SPR2A_HUMAN	8	8.49	unknown	0.00784811	0	0.0243389	0.0045686	0.00395316	0	0.00473147	0	0.00352038	0.00383477	0	0	0	0	0
128	Secreted phosphoprotein 24 OS=Homo sapiens GN=SPP2 PE=1 SV=1	SPP24_HUMAN	24	8.46	Homo sapiens	0	0	0	0	0	0	0	0	0	0	0.00726724	0.00609278	0	0.00467472	0
129	Filaggrin-2 OS=Homo sapiens GN=FLG2 PE=1 SV=1	FILA2_HUMAN	248	8.35	Homo sapiens	0.00036814	0.00038206	0.000308073	7.2633e-05	9.56409e-05	0	0	0.000111314	0.00031127	8.0058e-05	0	0	0	0	0
130	Apolipoprotein C-I OS=Homo sapiens GN=APOC1 PE=1 SV=1	APOC1_HUMAN	9	9.17	Homo sapiens	0.00331541	0	0	0	0.00527848	0	0	0	0	0	0	0.00630903	0	0.00291253	0
131	Ig kappa chain V-III region B6 OS=Homo sapiens PE=1 SV=1	KV301_HUMAN	12	9.53	Homo sapiens	0	0	0	0	0.00196493	0	0.00150783	0	0.00223945	0.00408066	0	0	0	0	0
132	Complement component C8 gamma chain OS=Homo sapiens GN=C8G PE=1 SV=3	CO8G_HUMAN	22	8.48	Homo sapiens	0	0	0	0	0	0.0019502	0	0	0	0	0.00496906	0.00312908	0.0044551	0.00299836	0
133	Trypsin-1 OS=Homo sapiens GN=PRSS1 PE=1 SV=1	TRY1_HUMAN	27	6.49	unknown	0.00332813	0	0	0	0.00175604	0.00238358	0.000700082	0	0.000497656	0.00143944	0	0	0	0	0
134	Sorbin and SH3 domain-containing protein 2 OS=Homo sapiens GN=SORBS2 PE=1 SV=3	SRBS2_HUMAN	124	8.42	unknown	0	0	0	0	0.000190154	0	0	0	0	0	0	0	0	0	0
135	Keratin, type II cuticular Hb5 OS=Homo sapiens GN=KRT85 PE=1 SV=1	KRT85_HUMAN	56	6.49	unknown	0	0.00589879	0	0	0	0.000735451	0	0.00365105	0	0	0	0	0	0	0
136	Galectin-3-binding protein OS=Homo sapiens GN=LGALS3BP PE=1 SV=1	LG3BP_HUMAN	65	4.9	unknown	0	0.00122085	0	0.00182236	0	0	0	0	0.000748846	0	0.00117811	0.000241599	0.000490738	0.000403274	0
137	Alpha-1-acid glycoprotein 1 OS=Homo sapiens GN=ORM1 PE=1 SV=1	A1AG1_HUMAN	24	4.66	Homo sapiens	0.00256084	0	0	0	0.000661711	0	0	0	0	0	0.000891795	0.000572385	0.00227309	0.00247536	0
138	Vitamin K-dependent protein Z OS=Homo sapiens GN=PROZ PE=1 SV=2	PROZ_HUMAN	45	5.87	Homo sapiens	0	0	0	0	0	0	0	0	0	0	0.00315056	0.0029462	0.00194176	0	0
139	Solute carrier family 2, facilitated glucose transporter member 3 OS=Homo sapiens GN=SLC2A3 PE=2 SV=1	GTR3_HUMAN	54	7.24	Homo sapiens	0	0	0.00254487	0.00101098	0.00175668	0	0	0	0.000776974	0.00183153	0	0	0	0	0
140	Desmocollin-1 OS=Homo sapiens GN=DSC1 PE=1 SV=2	DSC1_HUMAN	100	5.08	Homo sapiens	0.000313924	0	0.000382277	0.000365488	0.00039541	0	0	0	0.000339486	0	0	0	0	0	0
141	ATP synthase subunit beta, mitochondrial OS=Homo sapiens GN=ATP5B PE=1 SV=3	ATPB_HUMAN	57	5.07	Homo sapiens	0	0	0	0.000632578	0.00110557	0	0.000332448	0.00215286	0.000736081	0.000333519	0	0	0	0	0
142	Prenylcysteine oxidase 1 OS=Homo sapiens GN=PCYOX1 PE=1 SV=3	PCYOX_HUMAN	57	6.1	unknown	0	0	0	0.000949138	0.000830174	0	0.0011323	0	0.000736081	0.000681841	0	0	0	0.000694837	0
143	Phosphatidylinositol-glycan-specific phospholipase D OS=Homo sapiens GN=GPLD1 PE=1 SV=3	PHLD_HUMAN	92	6.33	unknown	0	0	0	0	0	0	0	0	0	0	0.000711792	0.000822917	0.00212314	0.000145575	0
144	Keratin, type II cytoskeletal 6C OS=Homo sapiens GN=KRT6C PE=1 SV=3	K2C6C_HUMAN	60	8.16	Homo sapiens	0	0	0.0192179	0.00686076	0.0123792	0	0.00252029	0	0.00908568	0	0	0	0	0	0
145	Ig heavy chain V-III region BUT OS=Homo sapiens PE=1 SV=1	HV306_HUMAN	12	9.48	Homo sapiens	0	0	0	0	0.00789831	0	0.0155299	0	0	0.0106783	0	0	0	0	0
146	Hemopexin OS=Homo sapiens GN=HPX PE=1 SV=2	HEMO_HUMAN	52	7.02	Homo sapiens	0	0	0	0	0	0	0	0	0	0	0.00209954	0.00228456	0	0.00126985	0
147	Neutrophil defensin 1 OS=Homo sapiens GN=DEFA1 PE=1 SV=1	DEF1_HUMAN	10	7.04	Homo sapiens	0	0	0	0.0018044	0.00315321	0	0.00653968	0	0.00355262	0	0	0	0	0	0
148	Lipocalin-1 OS=Homo sapiens GN=LCN1 PE=1 SV=1	LCN1_HUMAN	19	5.3	unknown	0.00720177	0	0	0.00192525	0	0	0.000997345	0	0	0	0	0	0	0	0
149	Alpha-2-HS-glycoprotein OS=Homo sapiens GN=AHSG PE=1 SV=1	FETUA_HUMAN	39	5.52	Homo sapiens	0	0	0	0	0	0	0	0	0	0	0.00251865	0.00225043	0.000545264	0	0
150	Mannan-binding lectin serine protease 1 OS=Homo sapiens GN=MASP1 PE=1 SV=3	MASP1_HUMAN	79	5.18	Homo sapiens	0	0	0	0	0	0	0	0	0	0	0.00179957	0.000958333	0.000544232	0.000745674	0
151	Ig kappa chain V-III region NG9 (Fragment) OS=Homo sapiens PE=2 SV=1	KV303_HUMAN	11	9.53	unknown	0	0	0	0.00409386	0.00287502	0	0.00164491	0	0.0030538	0	0	0	0	0	0
152	Hemoglobin subunit alpha OS=Homo sapiens GN=HBA1 PE=1 SV=2	HBA_HUMAN	15	9.09	Homo sapiens	0	0	0	0.00185358	0.00317165	0	0	0	0	0	0	0	0	0	0
153	14-3-3 protein zeta/delta OS=Homo sapiens GN=YWHAZ PE=1 SV=1	1433Z_HUMAN	28	4.43	Homo sapiens	0	0	0	0	0	0	0	0	0	0	0	0.00283406	0	0.00307577	0.00205129
154	Glyceraldehyde-3-phosphate dehydrogenase OS=Homo sapiens GN=GAPDH PE=1 SV=3	G3P_HUMAN	36	8.73	Homo sapiens	0	0	0	0.00100158	0.000436651	0	0	0.00529687	0.000782307	0	0	0	0	0	0.0105835
155	Beta-Ala-His dipeptidase OS=Homo sapiens GN=CNDP1 PE=1 SV=4	CNDP1_HUMAN	57	4.95	unknown	0	0	0	0	0	0	0	0	0	0	0	0.000480436	0.00458265	0	0
156	CD9 antigen OS=Homo sapiens GN=CD9 PE=1 SV=4	CD9_HUMAN	25	7.19	Homo sapiens	0	0	0	0.00146319	0.00126402	0	0	0	0.00108921	0	0	0	0	0	0
157	Calmodulin-like protein 5 OS=Homo sapiens GN=CALML5 PE=1 SV=2	CALL5_HUMAN	16	4.05	Homo sapiens	0.00855926	0	0	0	0	0	0	0	0	0	0	0	0	0	0
158	Complement C4-B OS=Homo sapiens GN=C4B PE=1 SV=2	CO4B_HUMAN	193	7.28	Homo sapiens	0	0	0	0	0	0	0	0	0	0	0	0.0103371	0	0.010637	0
159	Tubulin beta-1 chain OS=Homo sapiens GN=TUBB1 PE=1 SV=1	TBB1_HUMAN	50	4.82	Homo sapiens	0	0	0	0	0	0	0	0	0.000413807	0	0	0.00158708	0	0.00224096	0
160	Ig kappa chain V-I region DEE OS=Homo sapiens PE=1 SV=1	KV105_HUMAN	12	8.46	Homo sapiens	0	0	0	0	0.00132342	0	0	0	0.00397851	0	0	0	0	0	0
161	Junction plakoglobin OS=Homo sapiens GN=JUP PE=1 SV=3	PLAK_HUMAN	82	6.05	Homo sapiens	0	0	0.000466191	0.000446095	0.000481222	0	0	0	0.000759635	0.000473963	0	0	0	0	0
162	Talin-1 OS=Homo sapiens GN=TLN1 PE=1 SV=3	TLN1_HUMAN	270	5.94	Homo sapiens	0	0	0	0	5.85653e-05	0	0	0	0	0	0	0	0	0.000121633	0
163	Elongation factor 1-alpha 2 OS=Homo sapiens GN=EEF1A2 PE=1 SV=1	EF1A2_HUMAN	50	9.5	unknown	0	0	0	0	0	0	0	0.00380366	0	0	0	0	0.00043458	0	0.00125866
164	Tubulin alpha-4A chain OS=Homo sapiens GN=TUBA4A PE=1 SV=1	TBA4A_HUMAN	50	4.69	Homo sapiens	0	0	0	0	0	0	0	0	0	0	0	0.0014497	0	0.00157995	0
165	Lumican OS=Homo sapiens GN=LUM PE=1 SV=2	LUM_HUMAN	38	6.6	Homo sapiens	0	0	0	0	0	0	0	0	0	0	0.00172329	0.00131467	0.00285297	0.00190829	0
166	von Willebrand factor OS=Homo sapiens GN=VWF PE=1 SV=4	VWF_HUMAN	309	5.15	Homo sapiens	9.65654e-05	0	0	0	0.000332468	0	0	0	0	0.000350835	0	0	0	0	0
167	Platelet glycoprotein Ib beta chain OS=Homo sapiens GN=GP1BB PE=1 SV=1	GP1BB_HUMAN	22	9.37	Homo sapiens	0	0	0.00184911	0	0.00144062	0	0	0	0	0	0	0	0	0	0
168	HLA class I histocompatibility antigen, A-11 alpha chain OS=Homo sapiens GN=HLA-A PE=1 SV=1	1A11_HUMAN	41	6.06	unknown	0	0	0	0	0.00481964	0	0	0	0.00271082	0	0	0	0	0	0
169	Mannan-binding lectin serine protease 2 OS=Homo sapiens GN=MASP2 PE=1 SV=4	MASP2_HUMAN	76	5.37	Homo sapiens	0	0	0	0	0	0	0	0	0	0	0	0.000137754	0.00200135	0.000869802	0
170	Amyloid beta A4 protein OS=Homo sapiens GN=APP PE=1 SV=3	A4_HUMAN	87	4.45	Homo sapiens	0	0	0	0	0	0	0	0	0	0	0	0.000652658	0	0.000683692	0.00201827
171	Voltage-dependent anion-selective channel protein 3 OS=Homo sapiens GN=VDAC3 PE=1 SV=1	VDAC3_HUMAN	31	8.9	Homo sapiens	0	0	0	0	0.00203653	0	0	0	0.00135344	0	0	0	0	0	0
172	Keratin, type II cuticular Hb6 OS=Homo sapiens GN=KRT86 PE=1 SV=1	KRT86_HUMAN	53	5.35	unknown	0	0.0036186	0	0	0	0	0	0.00409911	0	0	0	0	0	0	0
173	Resistin OS=Homo sapiens GN=RETN PE=2 SV=1	RETN_HUMAN	11	6.89	Homo sapiens	0.00558728	0	0	0	0	0.00763486	0	0	0.00256028	0.00358751	0	0	0	0	0
174	Band 3 anion transport protein OS=Homo sapiens GN=SLC4A1 PE=1 SV=3	B3AT_HUMAN	102	4.84	Homo sapiens	0	0.000618936	0	0.000535223	0	0	0	0	0.000617009	0	0	0	0	0	0
175	Filaggrin OS=Homo sapiens GN=FLG PE=1 SV=3	FILA_HUMAN	435	9.6	Homo sapiens	0.000172013	0	0	0	9.10345e-05	0	0	0	9.6452e-05	0.000112166	0	0	0	0	0
176	Alpha-actinin-1 OS=Homo sapiens GN=ACTN1 PE=1 SV=2	ACTN1_HUMAN	103	5.07	Homo sapiens	0	0	0	0	0	0	0	0	0	0	0	0.000668347	0	0.000768379	0
177	Keratin, type I cuticular Ha1 OS=Homo sapiens GN=KRT31 PE=1 SV=3	K1H1_HUMAN	47	4.53	unknown	0	0.00570274	0	0	0	0	0	0.00288112	0	0	0	0	0	0	0
178	Pleckstrin OS=Homo sapiens GN=PLEK PE=1 SV=3	PLEK_HUMAN	40	8.45	Homo sapiens	0	0	0	0	0.00138182	0	0	0	0.000712997	0.00197621	0	0	0	0	0
179	Calreticulin OS=Homo sapiens GN=CALR PE=1 SV=1	CALR_HUMAN	48	4.04	Homo sapiens	0	0	0	0	0	0	0	0	0	0	0	0.00157726	0	0.00109968	0
180	Integrin alpha-2 OS=Homo sapiens GN=ITGA2 PE=1 SV=1	ITA2_HUMAN	129	4.95	unknown	0	0	0	0	0.000919751	0	0	0	0	0.000536777	0	0	0	0	0
181	Serglycin OS=Homo sapiens GN=SRGN PE=1 SV=3	SRGN_HUMAN	18	4.57	Homo sapiens	0	0	0	0	0	0	0	0	0	0	0	0.00210301	0	0.00108044	0.0261355
182	ATP synthase subunit alpha, mitochondrial OS=Homo sapiens GN=ATP5A1 PE=1 SV=1	ATPA_HUMAN	60	9.56	Homo sapiens	0	0	0	0	0.00026199	0	0	0	0	0.000340868	0	0	0	0	0
183	Gelsolin OS=Homo sapiens GN=GSN PE=1 SV=1	GELS_HUMAN	86	6.19	Homo sapiens	0	0	0	0	0	0	0	0	0	0	0.000257956	0	0.00138695	0.000387637	0
184	Alpha-2-antiplasmin OS=Homo sapiens GN=SERPINF2 PE=1 SV=3	A2AP_HUMAN	55	6.24	Homo sapiens	0	0	0	0	0	0	0	0	0	0	0.00119063	0.000937211	0	0.000832761	0
185	Ig kappa chain V-III region IARC/BL41 OS=Homo sapiens PE=4 SV=1	KV311_HUMAN	14	4.59	unknown	0	0	0	0.00132399	0	0	0	0	0.00157782	0	0	0	0	0	0
186	Apolipoprotein C-IV OS=Homo sapiens GN=APOC4 PE=1 SV=1	APOC4_HUMAN	15	9.13	Homo sapiens	0	0	0.00254851	0	0	0	0	0	0	0	0	0	0	0.00175721	0
187	Lipopolysaccharide-binding protein OS=Homo sapiens GN=LBP PE=1 SV=3	LBP_HUMAN	53	6.68	Homo sapiens	0	0	0	0	0	0.00239411	0	0	0	0.00223838	0	0	0	0	0
188	Polymeric immunoglobulin receptor OS=Homo sapiens GN=PIGR PE=1 SV=4	PIGR_HUMAN	83	5.43	unknown	0.00036226	0	0	0.000657744	0	0	0	0	0	0	0	0	0	0	0
189	Serum amyloid A-4 protein OS=Homo sapiens GN=SAA4 PE=1 SV=2	SAA4_HUMAN	15	9.38	Homo sapiens	0	0	0	0	0	0	0	0	0	0	0	0.00160779	0.00286629	0.00529501	0
190	Serine/threonine-protein kinase N3 OS=Homo sapiens GN=PKN3 PE=1 SV=1	PKN3_HUMAN	99	8.56	unknown	0	0	0	0.000181949	0	0	0	0	0	0	0	0	0	0	0
191	Isocitrate dehydrogenase [NADP], mitochondrial OS=Homo sapiens GN=IDH2 PE=1 SV=2	IDHP_HUMAN	51	8.95	Homo sapiens	0	0	0.00074852	0	0	0	0	0	0	0	0	0	0	0.000262606	0
192	Alpha-1-acid glycoprotein 2 OS=Homo sapiens GN=ORM2 PE=1 SV=2	A1AG2_HUMAN	24	4.76	Homo sapiens	0	0	0	0	0	0	0	0	0	0	0.00181614	0	0.00179143	0	0
193	HLA class I histocompatibility antigen, B-56 alpha chain OS=Homo sapiens GN=HLA-B PE=1 SV=1	1B56_HUMAN	40	6.06	unknown	0	0	0	0.00160344	0.00553163	0	0	0	0.00192815	0	0	0	0	0	0
194	Leukocyte surface antigen CD47 OS=Homo sapiens GN=CD47 PE=1 SV=1	CD47_HUMAN	35	7.27	Homo sapiens	0	0	0	0	0	0	0	0	0.000394102	0	0	0	0	0	0
195	Protein S100-A7 OS=Homo sapiens GN=S100A7 PE=1 SV=4	S10A7_HUMAN	11	6.78	Homo sapiens	0.0110935	0	0.00717346	0	0	0	0	0	0	0	0	0	0	0	0
196	Adenosylhomocysteinase OS=Homo sapiens GN=AHCY PE=1 SV=4	SAHH_HUMAN	48	6.29	unknown	0	0	0	0	0	0	0	0.00284475	0	0	0	0	0	0	0
197	Tubulin beta chain OS=Homo sapiens GN=TUBB PE=1 SV=2	TBB5_HUMAN	50	4.52	Homo sapiens	0	0	0	0	0	0	0	0	0	0	0	0.00103093	0	0.00118535	0
198	Suprabasin OS=Homo sapiens GN=SBSN PE=1 SV=2	SBSN_HUMAN	61	7.01	Homo sapiens	0.0014967	0	0	0.000295295	0.000259223	0	0	0	0.000220274	0	0	0	0	0	0
199	Protein S100-A8 OS=Homo sapiens GN=S100A8 PE=1 SV=1	S10A8_HUMAN	11	7.07	Homo sapiens	0.00544603	0	0.00717346	0	0	0	0	0	0	0	0	0	0	0	0
200	Integrin alpha-6 OS=Homo sapiens GN=ITGA6 PE=1 SV=5	ITA6_HUMAN	127	6.57	Homo sapiens	0	0	0	0	0.000248823	0	0	0	0.000330367	0	0	0	0	0	0
201	Keratin, type II cytoskeletal 6B OS=Homo sapiens GN=KRT6B PE=1 SV=5	K2C6B_HUMAN	60	8.16	unknown	0	0	0	0	0.00395316	0	0	0	0.00897073	0	0	0	0	0	0
202	Heat shock protein HSP 90-alpha OS=Homo sapiens GN=HSP90AA1 PE=1 SV=5	HS90A_HUMAN	85	4.66	Homo sapiens	0	0	0	0	0	0	0	0	0	0	0	0.00052615	0	0.000152533	0
203	Histone H4 OS=Homo sapiens GN=HIST1H4A PE=1 SV=2	H4_HUMAN	11	11.91	unknown	0	0	0	0	0.00143751	0	0	0.00989806	0	0.00180494	0	0	0	0	0
204	Protein S100-A9 OS=Homo sapiens GN=S100A9 PE=1 SV=1	S10A9_HUMAN	13	6.07	unknown	0.00229529	0	0	0	0	0	0	0	0	0.00757545	0	0	0	0	0
205	Selenoprotein P OS=Homo sapiens GN=SEPP1 PE=1 SV=3	SEPP1_HUMAN	43	7.92	Homo sapiens	0	0	0	0	0	0	0	0	0	0	0.0015229	0.000636858	0	0	0
206	Desmoglein-1 OS=Homo sapiens GN=DSG1 PE=1 SV=2	DSG1_HUMAN	114	4.66	Homo sapiens	0	0	0	0.000560182	0	0	0	0	0.000117866	0	0	0	0	0	0
207	Ig kappa chain V-II region TEW OS=Homo sapiens PE=1 SV=1	KV204_HUMAN	12	8.85	Homo sapiens	0	0	0	0	0	0	0	0	0.00306799	0	0	0	0	0	0
208	Apolipoprotein F OS=Homo sapiens GN=APOF PE=1 SV=2	APOF_HUMAN	35	5.36	Homo sapiens	0	0	0	0	0	0	0	0	0	0	0	0.000448684	0.000620829	0.000573981	0
209	Inter-alpha-trypsin inhibitor heavy chain H4 OS=Homo sapiens GN=ITIH4 PE=1 SV=4	ITIH4_HUMAN	103	6.97	Homo sapiens	0	0	0	0	0	0	0	0	0	0	0	0	0.00042192	0.000258644	0
210	Platelet basic protein OS=Homo sapiens GN=PPBP PE=1 SV=3	CXCL7_HUMAN	14	9.07	Homo sapiens	0	0	0	0	0	0	0	0	0	0.0013579	0	0	0	0	0
211	Collectin-11 OS=Homo sapiens GN=COLEC11 PE=1 SV=1	COL11_HUMAN	29	5.06	Homo sapiens	0	0	0	0	0	0	0	0	0	0	0	0.00130532	0	0.00136571	0
212	Extracellular superoxide dismutase [Cu-Zn] OS=Homo sapiens GN=SOD3 PE=1 SV=2	SODE_HUMAN	26	6.59	Homo sapiens	0	0	0	0	0	0	0	0	0	0	0	0.00139653	0	0.000515111	0
213	Fibulin-1 OS=Homo sapiens GN=FBLN1 PE=1 SV=4	FBLN1_HUMAN	77	4.86	Homo sapiens	0	0	0	0	0	0	0	0	0	0	0	0	0.000288214	0.000596661	0
214	Myosin light polypeptide 6 OS=Homo sapiens GN=MYL6 PE=1 SV=2	MYL6_HUMAN	17	4.29	Homo sapiens	0	0	0	0	0	0	0	0	0	0	0	0.00142391	0	0.00235062	0
215	Keratin, type II cuticular Hb4 OS=Homo sapiens GN=KRT84 PE=2 SV=2	KRT84_HUMAN	65	7.61	unknown	0	0	0	0	0	0	0	0.00294141	0	0	0	0	0	0	0
216	Amine oxidase [flavin-containing] B OS=Homo sapiens GN=MAOB PE=1 SV=3	AOFB_HUMAN	59	7.55	unknown	0	0	0	0.000925301	0.000266431	0	0	0	0.000227741	0	0	0	0	0	0
217	Angiotensinogen OS=Homo sapiens GN=AGT PE=1 SV=1	ANGT_HUMAN	53	6.27	Homo sapiens	0	0	0	0	0	0	0	0	0	0	0.00143748	0	0.000418726	0.000252696	0
218	Disintegrin and metalloproteinase domain-containing protein 10 OS=Homo sapiens GN=ADAM10 PE=1 SV=1	ADA10_HUMAN	84	7.81	Homo sapiens	0	0	0	0	0.000377306	0	0	0	0	0	0	0	0	0	0
219	GTP-binding nuclear protein Ran OS=Homo sapiens GN=RAN PE=1 SV=3	RAN_HUMAN	24	7.59	Homo sapiens	0	0	0	0	0	0	0	0.00453661	0	0	0	0	0	0	0
220	Ig kappa chain V-I region Scw OS=Homo sapiens PE=1 SV=1	KV117_HUMAN	12	8.85	unknown	0	0	0	0.00525379	0	0	0.00603132	0	0	0	0	0	0	0	0
221	Coagulation factor XII OS=Homo sapiens GN=F12 PE=1 SV=3	FA12_HUMAN	68	7.76	Homo sapiens	0	0	0	0	0	0	0	0	0.000216564	0	0	0	0	0	0
222	Ig kappa chain V-III region GOL OS=Homo sapiens PE=1 SV=1	KV307_HUMAN	12	9.53	unknown	0	0	0	0	0	0	0.0094511	0	0	0	0	0	0	0	0
223	Tubulin alpha-1B chain OS=Homo sapiens GN=TUBA1B PE=1 SV=1	TBA1B_HUMAN	50	4.7	Homo sapiens	0	0	0	0	0	0	0	0	0	0	0	0.00161886	0	0.00118398	0
224	Alpha-enolase OS=Homo sapiens GN=ENO1 PE=1 SV=2	ENOA_HUMAN	47	7.46	Homo sapiens	0	0	0	0	0	0	0	0.00203497	0	0	0	0	0	0	0
225	Fatty acid-binding protein, epidermal OS=Homo sapiens GN=FABP5 PE=1 SV=3	FABP5_HUMAN	15	7.05	Homo sapiens	0.00408208	0	0	0	0	0	0	0	0	0	0	0	0	0	0
226	Alpha-1B-glycoprotein OS=Homo sapiens GN=A1BG PE=1 SV=4	A1BG_HUMAN	54	5.71	Homo sapiens	0	0	0	0	0	0	0	0	0	0	0	0.000290814	0	0	0
227	Prolactin-inducible protein OS=Homo sapiens GN=PIP PE=1 SV=1	PIP_HUMAN	17	8.18	unknown	0.0071392	0	0	0	0	0	0	0	0	0	0	0	0	0	0
228	Four and a half LIM domains protein 1 OS=Homo sapiens GN=FHL1 PE=1 SV=4	FHL1_HUMAN	36	9.15	unknown	0	0	0	0	0.00043924	0	0	0	0	0.00273558	0	0	0	0	0
229	Platelet glycoprotein Ib alpha chain OS=Homo sapiens GN=GP1BA PE=1 SV=2	GP1BA_HUMAN	72	6.24	Homo sapiens	0	0	0	0	0	0	0	0	0	0	0	0.000525752	0	0.000640116	0
230	Retinol-binding protein 4 OS=Homo sapiens GN=RBP4 PE=1 SV=3	RET4_HUMAN	23	5.85	Homo sapiens	0	0	0	0	0	0	0	0	0	0	0	0	0.00141711	0	0
231	Fermitin family homolog 3 OS=Homo sapiens GN=FERMT3 PE=1 SV=1	URP2_HUMAN	76	6.98	Homo sapiens	0	0	0	0	0	0	0	0	0	0	0	0.000386205	0	0	0
232	Collagen alpha-1(XXI) chain OS=Homo sapiens GN=COL21A1 PE=2 SV=1	COLA1_HUMAN	99	8.48	unknown	0	0	0	0	0	0	0	0.000268018	0	0	0	0	0	0	0
233	40S ribosomal protein S13 OS=Homo sapiens GN=RPS13 PE=1 SV=2	RS13_HUMAN	17	11.19	unknown	0	0	0	0	0	0	0	0.00562608	0	0	0	0	0	0	0
234	Histone H2A type 1-C OS=Homo sapiens GN=HIST1H2AC PE=1 SV=3	H2A1C_HUMAN	14	11.66	unknown	0	0	0	0	0	0	0	0.00387164	0	0	0	0	0	0	0
235	Beta-2-microglobulin OS=Homo sapiens GN=B2M PE=1 SV=1	B2MG_HUMAN	14	6.51	Homo sapiens	0	0	0	0	0.00169421	0	0	0	0	0	0	0	0	0	0
236	Ras-related protein Rab-10 OS=Homo sapiens GN=RAB10 PE=1 SV=1	RAB10_HUMAN	23	8.61	Homo sapiens	0	0	0	0	0	0	0	0	0	0	0	0	0	0.000575978	0
237	Serum amyloid A-2 protein OS=Homo sapiens GN=SAA2 PE=1 SV=1	SAA2_HUMAN	14	9.48	Homo sapiens	0	0	0	0	0	0	0	0	0	0	0	0	0	0.0023812	0
238	HLA class I histocompatibility antigen, B-40 alpha chain OS=Homo sapiens GN=HLA-B PE=1 SV=1	1B40_HUMAN	41	6.51	unknown	0	0	0	0	0.00617171	0	0	0	0	0	0	0	0	0	0
239	Voltage-dependent anion-selective channel protein 2 OS=Homo sapiens GN=VDAC2 PE=1 SV=2	VDAC2_HUMAN	32	7.65	unknown	0	0	0	0	0.000987516	0	0	0	0	0	0	0	0	0	0
240	Collectin-10 OS=Homo sapiens GN=COLEC10 PE=2 SV=2	COL10_HUMAN	31	7.39	Homo sapiens	0	0	0	0	0	0	0	0	0	0	0	0.000337719	0.000685978	0	0
241	tRNA-dihydrouridine(47) synthase [NAD(P)(+)]-like OS=Homo sapiens GN=DUS3L PE=1 SV=2	DUS3L_HUMAN	72	8.4	unknown	0	0	0	0	0	0	0	0	0.000204533	0	0	0	0	0	0
242	Cathelicidin antimicrobial peptide OS=Homo sapiens GN=CAMP PE=1 SV=1	CAMP_HUMAN	19	10.03	Homo sapiens	0	0	0	0	0.00207325	0	0	0	0	0	0	0	0	0	0
243	Barrier-to-autointegration factor OS=Homo sapiens GN=BANF1 PE=1 SV=1	BAF_HUMAN	10	5.88	unknown	0	0	0	0	0	0	0	0	0	0.00489679	0	0	0	0	0
244	IQ and AAA domain-containing protein 1-like OS=Homo sapiens GN=IQCA1L PE=3 SV=2	IQCAL_HUMAN	95	9.79	unknown	0	0	0.000830611	0	0	0	0	0	0	0	0	0	0	0	0
245	10 kDa heat shock protein, mitochondrial OS=Homo sapiens GN=HSPE1 PE=1 SV=2	CH10_HUMAN	11	9.49	unknown	0	0	0	0	0.00142904	0	0	0	0	0	0	0	0	0	0
246	40S ribosomal protein S9 OS=Homo sapiens GN=RPS9 PE=1 SV=3	RS9_HUMAN	23	11.32	unknown	0	0	0	0	0	0	0	0.00120301	0	0	0	0	0	0	0
247	Caspase-14 OS=Homo sapiens GN=CASP14 PE=1 SV=2	CASPE_HUMAN	28	5.28	unknown	0.00213951	0	0	0	0	0	0	0	0	0	0	0	0	0	0
248	SPARC OS=Homo sapiens GN=SPARC PE=1 SV=1	SPRC_HUMAN	35	4.47	Homo sapiens	0	0	0	0	0	0	0	0	0	0	0	0.000691615	0	0	0
249	Tropomyosin beta chain OS=Homo sapiens GN=TPM2 PE=1 SV=1	TPM2_HUMAN	33	4.36	unknown	0	0	0	0	0	0	0	0	0	0	0	0.00190351	0	0	0
250	L-lactate dehydrogenase A chain OS=Homo sapiens GN=LDHA PE=1 SV=2	LDHA_HUMAN	37	8.45	unknown	0	0	0	0	0	0	0	0.000747815	0	0	0	0	0	0	0
251	Endonuclease domain-containing 1 protein OS=Homo sapiens GN=ENDOD1 PE=1 SV=2	ENDD1_HUMAN	55	5.38	Homo sapiens	0	0	0	0	0	0	0	0	0.000762847	0	0	0	0	0	0
252	Thioredoxin-dependent peroxide reductase, mitochondrial OS=Homo sapiens GN=PRDX3 PE=1 SV=3	PRDX3_HUMAN	28	7.88	Homo sapiens	0	0	0	0	0.000561408	0	0	0	0	0	0	0	0	0	0
253	Choline transporter-like protein 1 OS=Homo sapiens GN=SLC44A1 PE=1 SV=1	CTL1_HUMAN	73	8.69	unknown	0	0	0	0	0.000215335	0	0	0	0	0	0	0	0	0	0
254	Junctional adhesion molecule A OS=Homo sapiens GN=F11R PE=1 SV=1	JAM1_HUMAN	33	8.02	Homo sapiens	0	0	0	0	0.00047917	0	0	0	0	0	0	0	0	0	0
255	Ras-related protein Rap-1A OS=Homo sapiens GN=RAP1A PE=1 SV=1	RAP1A_HUMAN	21	6.55	unknown	0	0	0	0	0	0	0	0	0	0	0	0.000654155	0	0	0
256	Aggrecan core protein OS=Homo sapiens GN=ACAN PE=1 SV=2	PGCA_HUMAN	250	3.82	Homo sapiens	0	0	0	0	0	0	0	0	0	0	0	0	0	5.35716e-05	0
257	Tropomyosin alpha-1 chain OS=Homo sapiens GN=TPM1 PE=1 SV=2	TPM1_HUMAN	33	4.39	Homo sapiens	0	0	0	0	0	0	0	0	0	0	0	0.000827129	0	0	0
258	Lactotransferrin OS=Homo sapiens GN=LTF PE=1 SV=6	TRFL_HUMAN	78	8.17	unknown	0	0	0	0	0	0	0.000363504	0	0	0	0	0	0	0	0
259	Complement component C6 OS=Homo sapiens GN=C6 PE=1 SV=3	CO6_HUMAN	105	6.74	Homo sapiens	0	0	0	0	0	0	0	0	0	0	0	0	0.000211357	0	0
260	Synaptotagmin-like protein 4 OS=Homo sapiens GN=SYTL4 PE=1 SV=2	SYTL4_HUMAN	76	9.42	Homo sapiens	0	0	0	0	0	0	0	0.000363235	0	0	0	0	0	0	0
261	60S ribosomal protein L12 OS=Homo sapiens GN=RPL12 PE=1 SV=1	RL12_HUMAN	18	10.11	unknown	0	0	0	0	0	0	0	0.00153718	0	0	0	0	0	0	0
262	60 kDa heat shock protein, mitochondrial OS=Homo sapiens GN=HSPD1 PE=1 SV=2	CH60_HUMAN	61	5.55	Homo sapiens	0	0	0	0	0	0	0	0.000453593	0	0	0	0	0	0	0
263	Complement factor B OS=Homo sapiens GN=CFB PE=1 SV=2	CFAB_HUMAN	86	7.07	Homo sapiens	0	0	0	0	0.000182784	0	0	0	0	0	0	0	0	0	0
264	Latent-transforming growth factor beta-binding protein 1 OS=Homo sapiens GN=LTBP1 PE=1 SV=4	LTBP1_HUMAN	187	5.85	Homo sapiens	0	0	0	0	8.45595e-05	0	0	0	0	0	0	0	0	0	0

## Sheet: pI
						CHOL					DOPG					DOTAP
						21.917	21.119	17.097	36.6412	42.1832	15.7675	35.765	24.4563	47.7391	33.7475	30.5481	53.6856	30.6904	50.507	11.4244
#	Identified Proteins (264)	Accession Number	Molecular Weight	pI	Taxonomy	CHOL_A	CHOL_B	CHOL_C	CHOL_D	CHOL_E	DOPG_A	DOPG_B	DOPG_C	DOPG_D	DOPG_E	DOTAP_A	DOTAP_B	DOTAP_C	DOTAP_D	DOTAP_E
1	Apolipoprotein B-100 OS=Homo sapiens GN=APOB PE=1 SV=2	APOB_HUMAN	516	7.04	Homo sapiens	0.00503904	0.00621685	0.005399	0.00715502	0.00633999	0.00430024	0.00507719	0.00446819	0.00524484	0.00515747	0.00281177	0.00520091	0.0127424	0.0119213	0.00318886
2	Ig gamma-1 chain C region OS=Homo sapiens GN=IGHG1 PE=1 SV=1	IGHG1_HUMAN	36	8.31	Homo sapiens	0.0721767	0.0762075	0.0824366	0.081613	0.0845	0.119219	0.0897891	0.0924341	0.0860366	0.0941207	0.0336194	0.0464316	0.032587	0.0702498	0.0423178				34	0.0500769	0.0468067	0.0462012	0.086785	0.0789316	0.0265871	0.0966045	0.0841396	0.0805032	0.0870294	0.00995434	0.0329139	0.0151871	0.0352679	0.00125866
3	Complement C3 OS=Homo sapiens GN=C3 PE=1 SV=2	CO3_HUMAN	187	6.34	Homo sapiens	0.00627134	0.0103023	0.00731545	0.00627408	0.00739542	0.00518599	0.00409411	0.00779223	0.0036346	0.00565178	0.0277771	0.0168113	0.0213185	0.0107292	0.0152273				76	0.27314	0.275356	0.31478	0.341682	0.331058	0.269226	0.332686	0.303615	0.349884	0.357317	0.135735	0.159535	0.108403	0.191542	0.144147
4	Vitronectin OS=Homo sapiens GN=VTN PE=1 SV=1	VTNC_HUMAN	54	5.54	Homo sapiens	0.00421453	0.00320019	0.00254585	0.00269423	0.00146172	0	0.00484509	0.00302996	0.002595	0.00511911	0.0780435	0.0679082	0.103465	0.0614438	0.0596131				111	0.505162	0.536918	0.547565	0.561693	0.53498	0.543192	0.615708	0.534934	0.557751	0.557168	0.313182	0.340485	0.300305	0.376634	0.338383
5	Ig kappa chain C region OS=Homo sapiens GN=IGKC PE=1 SV=1	IGKC_HUMAN	12	5.68	Homo sapiens	0.1228	0.110508	0.110407	0.142573	0.150165	0.174462	0.170815	0.187515	0.15239	0.161533	0.0527546	0.105394	0.0461547	0.0896769	0.0141744				166	0.660458	0.676053	0.679233	0.684494	0.661842	0.651695	0.682766	0.646116	0.661408	0.66196	0.522507	0.50313	0.475282	0.541987	0.482345
6	Keratin, type II cytoskeletal 1 OS=Homo sapiens GN=KRT1 PE=1 SV=6	K2C1_HUMAN	66	8.33	Homo sapiens	0.0382572	0.0353776	0.0387383	0.0263221	0.0214348	0.0346164	0.019352	0.0326479	0.0257108	0.0272522	0.0134102	0.00954489	0.0121708	0.0125133	0.0337739				219	0.861972	0.841962	0.844856	0.873135	0.873843	0.866149	0.888165	0.886736	0.858663	0.867134	0.851844	0.857824	0.847512	0.85565	0.736792
7	Serum albumin OS=Homo sapiens GN=ALB PE=1 SV=2	ALBU_HUMAN	69	6.21	Homo sapiens	0.0273541	0.0194351	0.0286235	0.0202992	0.024971	0.0122392	0.0129671	0.0266855	0.0123503	0.0194759	0.0272017	0.0227248	0.0162281	0.0185506	0.026248				264	1	1	1	1	1	1	1	1	1	1	1	1	1	1	1
8	Ig mu chain C region OS=Homo sapiens GN=IGHM PE=1 SV=3	IGHM_HUMAN	49	6.77	Homo sapiens	0.0450334	0.0405906	0.0421552	0.045298	0.0225802	0.0552891	0.0234233	0.0381505	0.0349585	0.0266199	0.0262649	0.0169327	0.0159783	0.0198028	0.0227851
9	C4b-binding protein alpha chain OS=Homo sapiens GN=C4BPA PE=1 SV=2	C4BPA_HUMAN	67	7.31	Homo sapiens	0.0149464	0.0157649	0.009059	0.0162918	0.00577978	0.00694786	0.00194611	0.00467762	0.010235	0.0041025	0.0398818	0.0323008	0.0358158	0.029651	0.0799979
10	Complement C4-A OS=Homo sapiens GN=C4A PE=1 SV=2	CO4A_HUMAN	193	7.08	Homo sapiens	0.00314811	0.00433894	0.0027299	0.00349025	0.00421796	0.00252338	0.00173925	0.0014119	0.00268927	0.00338076	0.0169592	0.0102119	0.0129401	0.0102967	0.0121391
11	Ig gamma-2 chain C region OS=Homo sapiens GN=IGHG2 PE=1 SV=2	IGHG2_HUMAN	36	7.66	Homo sapiens	0.054136	0.0682942	0.0460949	0.0487566	0.0482819	0.075159	0.0750375	0.056458	0.0581686	0.0476679	0.0160562	0.0212536	0.0274758	0.0343009	0.00437034
12	Keratin, type I cytoskeletal 9 OS=Homo sapiens GN=KRT9 PE=1 SV=3	K1C9_HUMAN	62	4.89	Homo sapiens	0.0230635	0.0239209	0.0253558	0.0162982	0.0161864	0.0194685	0.0127715	0.0196039	0.0189198	0.0183223	0.0119675	0.00607916	0.00981681	0.00840787	0.0276796					CHOL					DOPG					DOTAP
13	Fibrinogen beta chain OS=Homo sapiens GN=FGB PE=1 SV=2	FIBB_HUMAN	56	8.38	Homo sapiens	0.00598646	0.0121104	0.00420342	0.011699	0.00973579	0.0139485	0.0225071	0.00805507	0.00996321	0.00935583	0.0293887	0.018681	0.0242469	0.0167461	0.0187735				N° prot	CHOL_A	CHOL_B	CHOL_C	CHOL_D	CHOL_E	DOPG_A	DOPG_B	DOPG_C	DOPG_D	DOPG_E	DOTAP_A	DOTAP_B	DOTAP_C	DOTAP_D	DOTAP_E
14	Keratin, type I cytoskeletal 10 OS=Homo sapiens GN=KRT10 PE=1 SV=6	K1C10_HUMAN	59	4.88	Homo sapiens	0.0177916	0.0187513	0.021139	0.0121818	0.0100455	0.0243988	0.0105625	0.0157492	0.0141366	0.0156027	0.0103405	0.00664804	0.00570845	0.00749044	0.0223207			>9	34	0.0500769	0.0468067	0.0462012	0.086785	0.0789316	0.0265871	0.0966045	0.0841396	0.0805032	0.0870294	0.00995434	0.0329139	0.0151871	0.0352679	0.00125866
15	Complement factor H OS=Homo sapiens GN=CFH PE=1 SV=4	CFAH_HUMAN	139	6.59	Homo sapiens	0.0025152	0.00442445	0.00447761	0.00386462	0.00255833	0.00941294	0.0048266	0.00402419	0.00231346	0.0035641	0.00730152	0.00481194	0.00663874	0.00537121	0.00336468			08_09	42	0.223063	0.228549	0.268579	0.254897	0.252126	0.242639	0.236081	0.219475	0.269381	0.270288	0.12578	0.126621	0.093216	0.156275	0.142888
16	Apolipoprotein D OS=Homo sapiens GN=APOD PE=1 SV=1	APOD_HUMAN	21	4.79	Homo sapiens	0.0187426	0.023352	0.0261186	0.0212012	0.0214581	0.0231117	0.0252692	0.0181367	0.0130225	0.0211847	0.0462653	0.0239299	0.0692926	0.0219876	0.109065			07_08	35	0.232022	0.261562	0.232785	0.22001	0.203922	0.273966	0.283022	0.231319	0.207867	0.19985	0.177448	0.18095	0.191902	0.185092	0.194236
17	Filamin-A OS=Homo sapiens GN=FLNA PE=1 SV=4	FLNA_HUMAN	281	5.95	Homo sapiens	0.00238013	0.002025	0.00201103	0.00249359	0.00371189	0.0018822	0.000532894	0.00184516	0.00241583	0.00249459	0	0.00189447	0	0.00220671	0			06_07	55	0.155296	0.139135	0.131668	0.122801	0.126862	0.108503	0.067058	0.111183	0.103657	0.104793	0.209325	0.162646	0.174978	0.165353	0.143962
18	Fibrinogen gamma chain OS=Homo sapiens GN=FGG PE=1 SV=3	FIBG_HUMAN	52	5.32	Homo sapiens	0.00643202	0.0106547	0.00491843	0.00576478	0.00805694	0.0130258	0.0155929	0.00760079	0.00765064	0.00609687	0.0170151	0.0128723	0.0112913	0.00951797	0.0118185			05_06	53	0.201515	0.165909	0.165623	0.188641	0.212001	0.214454	0.205399	0.240619	0.197255	0.205174	0.329337	0.354693	0.37223	0.313663	0.254447
19	Prothrombin OS=Homo sapiens GN=F2 PE=1 SV=2	THRB_HUMAN	70	5.7	Homo sapiens	0	0	0	0	0	0	0	0	0	0.000575807	0.0216673	0.017732	0.0207878	0.0231112	0.0150898			<5	45	0.138028	0.158038	0.155144	0.126865	0.126157	0.133851	0.111835	0.113264	0.141337	0.132866	0.148156	0.142176	0.152488	0.14435	0.263208
20	Alpha-2-macroglobulin OS=Homo sapiens GN=A2M PE=1 SV=3	A2MG_HUMAN	163	6.43	Homo sapiens	0.00457651	0.0071727	0.000468399	0.00318339	0.00625332	0	0.000116255	0	0.000469632	0.00321945	0.00395422	0.00422494	0.00379497	0.00226767	0.0026425			tot	264	1	1	1	1	1	1	1	1	1	1	1	1	1	1	1
21	Immunoglobulin lambda-like polypeptide 5 OS=Homo sapiens GN=IGLL5 PE=2 SV=2	IGLL5_HUMAN	23	9.05	Homo sapiens	0.017829	0.0288192	0.0271136	0.0265012	0.0268052	0.0247908	0.0292077	0.0338139	0.0227947	0.0296142	0.00995434	0.0144448	0.0118092	0.0163403	0
22	Keratin, type II cytoskeletal 6A OS=Homo sapiens GN=KRT6A PE=1 SV=3	K2C6A_HUMAN	60	8.16	Homo sapiens	0.00987966	0.00999427	0.0185603	0.00970846	0.0123792	0.0094906	0.00761734	0.0108989	0.013749	0.01023	0.00399592	0.000981373	0.00146405	0.00340973	0.0107945
23	Hyaluronan-binding protein 2 OS=Homo sapiens GN=HABP2 PE=1 SV=1	HABP2_HUMAN	63	6.52	Homo sapiens	0	0	0	0	0	0	0	0	0	0	0.0238902	0.0171951	0.0119139	0.0137231	0.0205004
24	Keratin, type I cytoskeletal 16 OS=Homo sapiens GN=KRT16 PE=1 SV=4	K1C16_HUMAN	51	4.69	Homo sapiens	0.0116491	0.0155072	0.0217844	0.0116025	0.0150311	0.013685	0.00803315	0.0109358	0.0211283	0.00871724	0.00277379	0.00213587	0	0.00323478	0.0102853
25	Keratin, type II cytoskeletal 2 epidermal OS=Homo sapiens GN=KRT2 PE=1 SV=2	K22E_HUMAN	65	8.17	Homo sapiens	0.0180337	0.0162788	0.0177199	0.0103598	0.0100904	0.0198256	0.00973953	0.0173915	0.0086278	0.0138699	0.00554323	0.00360571	0.00251075	0.00345756	0.0230974
26	Ig lambda-2 chain C regions OS=Homo sapiens GN=IGLC2 PE=1 SV=1	LAC2_HUMAN	11	7.34	Homo sapiens	0.0691221	0.0817501	0.0850395	0.0603536	0.0610605	0.0998485	0.0762896	0.0892488	0.0559596	0.069134	0.0516458	0.0372257	0.0513382	0.0262	0.0740996
27	Thrombospondin-1 OS=Homo sapiens GN=THBS1 PE=1 SV=2	TSP1_HUMAN	129	4.51	Homo sapiens	0.000476434	0.000857057	0.00121346	0	0.00238795	0.000332593	0	0.00084402	0.000592028	0.00192183	0.00490579	0.00671447	0.00100526	0.00849992	0.0104784
28	Apolipoprotein(a) OS=Homo sapiens GN=LPA PE=1 SV=1	APOA_HUMAN	501	5.77	Homo sapiens	0.000122675	0.00261628	0.000467342	0.00123414	0.000535962	0	0.000856375	0.000408164	0.000919916	0.000551164	0	0.000151114	0.00110643	0.00180558	0
29	CD5 antigen-like OS=Homo sapiens GN=CD5L PE=1 SV=1	CD5L_HUMAN	38	5.15	Homo sapiens	0.0148317	0.0149838	0.0154056	0.0110184	0.00935998	0.0183441	0.00932095	0.0132655	0.013082	0.0101385	0.0106008	0.00602991	0.00344309	0.007982	0.0160712
30	Haptoglobin OS=Homo sapiens GN=HP PE=1 SV=1	HPT_HUMAN	45	6.56	Homo sapiens	0.0104931	0.00737989	0.00825751	0.0066564	0.00930106	0	0.00144428	0.00664652	0.00403203	0.00591569	0.010422	0.012966	0.0122976	0.00924142	0
31	Serotransferrin OS=Homo sapiens GN=TF PE=1 SV=3	TRFE_HUMAN	77	7.13	Homo sapiens	0.0067151	0.00204504	0.0116517	0.00437495	0.00523392	0.00683738	0.00206221	0.00619628	0.00263115	0.00616829	0.00694767	0.00626597	0	0.00283453	0.00299752
32	Plasminogen OS=Homo sapiens GN=PLG PE=1 SV=2	PLMN_HUMAN	91	7.25	Homo sapiens	0.000330413	0.00433801	0	0.00370407	0.00381939	0.00047031	0.00287015	0.000892412	0.00237914	0.0013255	0.006114	0.0049374	0.00381538	0.00580203	0.00224513
33	Inter-alpha-trypsin inhibitor heavy chain H2 OS=Homo sapiens GN=ITIH2 PE=1 SV=2	ITIH2_HUMAN	106	6.85	Homo sapiens	0	0	0	0	0.000222445	0	0	0	0	0	0.00915975	0.00485943	0.00952548	0.00859635	0.00500589
34	Apolipoprotein A-I OS=Homo sapiens GN=APOA1 PE=1 SV=1	APOA1_HUMAN	31	5.5	Homo sapiens	0.00738786	0.00558788	0.006281	0.00410418	0.00356749	0.00132856	0	0.00483273	0.00270688	0	0.0207663	0.0141481	0.0287233	0.0136172	0.0207152
35	Integrin beta-3 OS=Homo sapiens GN=ITGB3 PE=1 SV=2	ITB3_HUMAN	87	4.85	Homo sapiens	0.00245965	0.0023599	0.00225246	0.00386872	0.00763223	0.00170506	0.00075196	0.00218565	0.00442702	0.00569781	0	0.0037629	0	0.00287632	0
36	Fibrinogen alpha chain OS=Homo sapiens GN=FGA PE=1 SV=2	FIBA_HUMAN	95	5.87	Homo sapiens	0.00192905	0.00397531	0.000830052	0.000764271	0.00133058	0.00290675	0.00177096	0.00274035	0.00395823	0.00104108	0.00356031	0.0028109	0.00766475	0.00291458	0.00339432
37	Inter-alpha-trypsin inhibitor heavy chain H1 OS=Homo sapiens GN=ITIH1 PE=1 SV=3	ITIH1_HUMAN	101	6.78	Homo sapiens	0	0	0	0	0.000156561	0	0	0	0	0	0.00626787	0.00308253	0.00817295	0.00862	0.00291931
38	Hornerin OS=Homo sapiens GN=HRNR PE=1 SV=2	HORN_HUMAN	282	10.24	Homo sapiens	0.00140123	0.00162098	0.00152093	0.0010029	0.00162524	0.000146047	0.00079364	0.0011584	0.00141178	0.00122686	0	0.000122646	7.70533e-05	0.000351872	0
39	Ig alpha-1 chain C region OS=Homo sapiens GN=IGHA1 PE=1 SV=2	IGHA1_HUMAN	38	6.49	Homo sapiens	0.00478777	0.00663734	0.00616224	0.00503516	0.00686005	0.0061364	0.00514288	0.00427585	0.0047672	0.00440272	0.00575365	0.0077479	0.00773169	0.00625342	0.00665585
40	Beta-2-glycoprotein 1 OS=Homo sapiens GN=APOH PE=1 SV=3	APOH_HUMAN	38	8.03	Homo sapiens	0.00679474	0.0062213	0.00713456	0.00598444	0.0174631	0.00778336	0.0127185	0.00571635	0.00421044	0.0192588	0	0.00167618	0	0.00121848	0
41	Apolipoprotein E OS=Homo sapiens GN=APOE PE=1 SV=1	APOE_HUMAN	36	5.42	Homo sapiens	0.00634019	0	0.00378323	0.00100072	0.00439033	0	0	0	0.00174819	0	0.0139468	0.0119364	0.0211447	0.014484	0.0153994
42	Serum paraoxonase/arylesterase 1 OS=Homo sapiens GN=PON1 PE=1 SV=3	PON1_HUMAN	40	4.89	Homo sapiens	0	0	0	0.000450325	0.000790013	0	0	0	0	0.00148293	0.0190873	0.0129883	0.0181922	0.0123787	0.0123825
43	Vitamin K-dependent protein S OS=Homo sapiens GN=PROS1 PE=1 SV=1	PROS_HUMAN	75	5.37	Homo sapiens	0	0	0	0	0	0	0	0	0	0	0.00713295	0.00750223	0.00694399	0.00818415	0.00706021
44	Keratin, type II cytoskeletal 5 OS=Homo sapiens GN=KRT5 PE=1 SV=3	K2C5_HUMAN	62	7.91	Homo sapiens	0.0100441	0.00942356	0.0126239	0.00645498	0.00777535	0.00852017	0.00585224	0.00724808	0.00971447	0.0074937	0.00421622	0.00191608	0.00280374	0.00276432	0.0128595
45	Keratin, type I cytoskeletal 14 OS=Homo sapiens GN=KRT14 PE=1 SV=4	K1C14_HUMAN	52	4.81	Homo sapiens	0.011121	0.013961	0.0206544	0.0108497	0.00957225	0.0113922	0.00663657	0.00891829	0.0162933	0.00759979	0.00312026	0.00320832	0	0.00443289	0.0152796
46	Ceruloplasmin OS=Homo sapiens GN=CP PE=1 SV=1	CERU_HUMAN	122	5.5	Homo sapiens	0	0	0	0	0.000128848	0	0	0	0	0	0.00438618	0.00373948	0.00685708	0.00335089	0
47	Complement C5 OS=Homo sapiens GN=C5 PE=1 SV=4	CO5_HUMAN	188	6.49	Homo sapiens	0	0.000172592	0	0.000191792	0.000420285	0	0.000247438	0	7.14719e-05	0	0.00261298	0.00201577	0.00306779	0.00189452	0
48	Fibronectin OS=Homo sapiens GN=FN1 PE=1 SV=4	FINC_HUMAN	263	5.45	Homo sapiens	0.000119363	0.000360269	0	0.000898917	0.000781236	0	0	0	0.000562583	0.000228749	0.000954187	0.00076534	0.000910577	0.00138025	0
49	Clusterin OS=Homo sapiens GN=CLU PE=1 SV=1	CLUS_HUMAN	52	6.21	Homo sapiens	0	0	0	0	0	0	0	0	0	0	0.00672048	0.00456826	0.0142341	0.00596301	0.0045128
50	Ig kappa chain V-III region HAH OS=Homo sapiens PE=2 SV=1	KV312_HUMAN	14	4.59	Homo sapiens	0.00322153	0.00792674	0.00273055	0.0188365	0.0124165	0.0135951	0.0199823	0.010701	0.0179814	0.0148293	0	0.00503063	0.00460654	0.00713841	0
51	Complement C1q subcomponent subunit C OS=Homo sapiens GN=C1QC PE=1 SV=3	C1QC_HUMAN	26	8.58	Homo sapiens	0.00526724	0.00973464	0.0104756	0.00805189	0.00637764	0.0081435	0.0054123	0.00523122	0.00536481	0.00494467	0.00714435	0.003904	0.0083662	0.00533153	0
52	Apolipoprotein C-III OS=Homo sapiens GN=APOC3 PE=1 SV=1	APOC3_HUMAN	11	5.04	Homo sapiens	0.0110831	0.00287448	0.0141167	0.00416797	0.00646543	0	0	0	0.00133876	0	0.0159138	0.0384421	0.0285795	0.0156002	0.0294153
53	Immunoglobulin J chain OS=Homo sapiens GN=IGJ PE=1 SV=4	IGJ_HUMAN	18	4.87	Homo sapiens	0.0135156	0.0105509	0.0118777	0.00908513	0.00658706	0.0117628	0.00571358	0.00829326	0.00815823	0.00933466	0.0078981	0.00534581	0	0.00658907	0
54	Coagulation factor V OS=Homo sapiens GN=F5 PE=1 SV=4	FA5_HUMAN	252	5.95	Homo sapiens	0.000843455	0.000125473	0	0.000505855	0.000627141	0.00100705	0.00033452	0.000269613	0.000497633	0.000627368	0.000215275	0.000438032	0.000733841	0.000444923	0.000447049
55	Actin, cytoplasmic 2 OS=Homo sapiens GN=ACTG1 PE=1 SV=1	ACTG_HUMAN	42	5.16	Homo sapiens	0.00796345	0.00225597	0	0.00390022	0.00282273	0	0	0.00582922	0.00233746	0.00282462	0	0.00434291	0.00102367	0.00439782	0.00402344
56	Ig gamma-3 chain C region OS=Homo sapiens GN=IGHG3 PE=1 SV=2	IGHG3_HUMAN	41	7.95	Homo sapiens	0.0437759	0.0557823	0.0504684	0.0325861	0.0352671	0.0603846	0.0624776	0.0498826	0.0312387	0.0370611	0.0194213	0.0203659	0.0262111	0.0219017	0
57	Inter-alpha-trypsin inhibitor heavy chain H3 OS=Homo sapiens GN=ITIH3 PE=1 SV=2	ITIH3_HUMAN	100	5.49	Homo sapiens	0	0	0	0	0	0	0	0	0	0	0.00370478	0.00308023	0.00467404	0.00322969	0.00374932
58	Ig heavy chain V-III region TRO OS=Homo sapiens PE=1 SV=1	HV301_HUMAN	13	10	Homo sapiens	0.00706513	0	0	0.0119185	0.010328	0	0.0150952	0.00510265	0.0161234	0.023467	0	0.00368815	0	0.00252589	0
59	Alpha-1-antitrypsin OS=Homo sapiens GN=SERPINA1 PE=1 SV=3	A1AT_HUMAN	47	5.31	Homo sapiens	0	0	0	0.000974825	0.0025227	0	0	0.00203429	0	0	0.00465189	0.0042836	0.0161811	0.00407244	0.00122205
60	Histidine-rich glycoprotein OS=Homo sapiens GN=HRG PE=1 SV=1	HRG_HUMAN	60	7.52	Homo sapiens	0.0017703	0.00130789	0	0	0.00223946	0.000713303	0.000301566	0	0.000568784	0.00261795	0.00290689	0.00281108	0.00580211	0.00528076	0.00233777
61	Ig heavy chain V-III region TUR OS=Homo sapiens PE=1 SV=1	HV318_HUMAN	12	10.12	Homo sapiens	0	0	0	0.0136469	0.00658344	0	0.0154348	0.0103627	0.0122522	0	0	0.00674151	0	0.00220791	0
62	Protein AMBP OS=Homo sapiens GN=AMBP PE=1 SV=1	AMBP_HUMAN	39	6.15	Homo sapiens	0	0	0	0	0	0	0.000484672	0	0	0	0.0106271	0.0061771	0.00416676	0.0120019	0
63	Cartilage oligomeric matrix protein OS=Homo sapiens GN=COMP PE=1 SV=2	COMP_HUMAN	83	4.16	Homo sapiens	0	0	0	0	0	0	0	0	0	0	0.00578962	0.00364859	0.00156518	0.00485843	0.00173001
64	Complement C1s subcomponent OS=Homo sapiens GN=C1S PE=1 SV=1	C1S_HUMAN	77	4.59	Homo sapiens	0	0	0	0	0	0	0	0	0	0	0.00623434	0.00386982	0.00338934	0.00403252	0
65	Coagulation factor IX OS=Homo sapiens GN=F9 PE=1 SV=2	FA9_HUMAN	52	5.16	Homo sapiens	0	0	0	0	0	0	0	0	0	0	0.00840567	0.00579402	0.00543669	0.00470138	0.00231479
66	Apolipoprotein A-IV OS=Homo sapiens GN=APOA4 PE=1 SV=3	APOA4_HUMAN	45	5.05	Homo sapiens	0	0	0	0	0	0	0	0	0	0	0.0140537	0.00543251	0.00724298	0.00263249	0.00127636
67	Platelet factor 4 OS=Homo sapiens GN=PF4 PE=1 SV=2	PLF4_HUMAN	11	8.78	Homo sapiens	0.00681274	0	0.00520562	0.0123851	0.00718729	0	0	0.011107	0.0158839	0.0188353	0	0.0104683	0	0.00539417	0
68	Myosin-9 OS=Homo sapiens GN=MYH9 PE=1 SV=4	MYH9_HUMAN	227	5.29	Homo sapiens	0	0	0	0	6.92486e-05	0	0	0	0	0	0	0.00105533	0	0.00291083	0
69	Ficolin-3 OS=Homo sapiens GN=FCN3 PE=1 SV=2	FCN3_HUMAN	33	6.66	unknown	0	0.00191308	0	0.00193517	0.00191556	0	0	0	0.0038001	0.00210737	0.00330087	0.0034908	0.00756518	0.00619523	0.014206
70	Platelet glycoprotein 4 OS=Homo sapiens GN=CD36 PE=1 SV=2	CD36_HUMAN	53	8.06	Homo sapiens	0.00144328	0	0.00220911	0.00291993	0.00462364	0	0	0	0.00290628	0.00373782	0	0.00165682	0	0.00161687	0.00118741
71	C4b-binding protein beta chain OS=Homo sapiens GN=C4BPB PE=1 SV=1	C4BPB_HUMAN	28	4.8	Homo sapiens	0	0.00228809	0	0	0	0	0	0	0	0	0.00972323	0.00792466	0.00700086	0.00826045	0.0105304
72	Properdin OS=Homo sapiens GN=CFP PE=1 SV=2	PROP_HUMAN	51	7.92	Homo sapiens	0.000585073	0.00247679	0	0.00392377	0.00201528	0	0.00237134	0.0013217	0.00260541	0.00114309	0	0.00216352	0	0.00052236	0
73	Kininogen-1 OS=Homo sapiens GN=KNG1 PE=1 SV=2	KNG1_HUMAN	72	6.8	Homo sapiens	0	0	0	0	0	0	0	0	0	0	0.00408738	0.00303642	0.00513688	0.00357355	0
74	Ig heavy chain V-III region GAL OS=Homo sapiens PE=1 SV=1	HV320_HUMAN	13	8.7	Homo sapiens	0.00938683	0.00853649	0.00900635	0.0125983	0.00608156	0	0.0129416	0.00837771	0.0113319	0.0121383	0	0.00635207	0	0.00661915	0
75	Erythrocyte band 7 integral membrane protein OS=Homo sapiens GN=STOM PE=1 SV=3	STOM_HUMAN	32	8.07	Homo sapiens	0.00334359	0.00296096	0.00298487	0.00626839	0.00592557	0.00594787	0.000590694	0.00165836	0.00742682	0.00461162	0	0.000426489	0	0	0
76	Ig kappa chain V-I region EU OS=Homo sapiens PE=1 SV=1	KV106_HUMAN	12	8.46	unknown	0.00760823	0.0157918	0.00975688	0.00912445	0.0138327	0.00700748	0.0124469	0.00331672	0.0062477	0.0140123	0	0.00171716	0	0.00439873	0
77	Ig heavy chain V-III region 23 OS=Homo sapiens GN=IGHV3-23 PE=1 SV=2	HV303_HUMAN	13	8.46	Homo sapiens	0.0103728	0.0181216	0.0134131	0.0195702	0.0115425	0.014707	0.0194042	0.00931578	0.0161234	0.0159375	0.0108978	0.00322132	0	0.0101536	0
78	Tropomyosin alpha-4 chain OS=Homo sapiens GN=TPM4 PE=1 SV=3	TPM4_HUMAN	29	4.36	Homo sapiens	0	0	0	0	0	0	0	0	0	0	0.00188772	0.0137204	0.00746876	0.00569377	0
79	Complement component C9 OS=Homo sapiens GN=C9 PE=1 SV=2	CO9_HUMAN	63	5.27	Homo sapiens	0	0	0	0	0	0	0	0	0	0	0.00554707	0.00412892	0.00397375	0.00114879	0.00416311
80	Keratin, type I cytoskeletal 17 OS=Homo sapiens GN=KRT17 PE=1 SV=2	K1C17_HUMAN	48	4.67	Homo sapiens	0.00855688	0.00952214	0.0113736	0.00682378	0.00658427	0.00793049	0.00269764	0.00540127	0.00961134	0.0078257	0	0	0	0	0
81	Complement C1q subcomponent subunit B OS=Homo sapiens GN=C1QB PE=1 SV=3	C1QB_HUMAN	27	8.87	Homo sapiens	0.00449081	0.00640038	0.00212081	0.0057135	0.00380491	0	0.000701836	0.0014741	0.00233092	0.00329539	0.00363805	0.00369889	0.00362149	0.00293375	0
82	Apolipoprotein M OS=Homo sapiens GN=APOM PE=1 SV=2	APOM_HUMAN	21	5.92	Homo sapiens	0.00142089	0	0	0	0.00112947	0	0	0	0	0	0.00831906	0.00696105	0.010325	0.00755066	0
83	Heparin cofactor 2 OS=Homo sapiens GN=SERPIND1 PE=1 SV=3	HEP2_HUMAN	57	6.89	Homo sapiens	0	0	0	0	0	0	0	0	0	0	0.00518538	0.00328447	0.00306188	0.0024332	0
84	Haptoglobin-related protein OS=Homo sapiens GN=HPR PE=2 SV=2	HPTR_HUMAN	39	7.11	Homo sapiens	0.00819348	0.0052524	0	0.0065238	0.0064823	0.00325354	0.00335429	0	0.00484115	0.0060838	0.00284413	0.00523389	0	0.00101904	0
85	Integrin alpha-IIb OS=Homo sapiens GN=ITGA2B PE=1 SV=3	ITA2B_HUMAN	113	5.03	Homo sapiens	0	0	0	0.00120563	0.00216891	0	0	0	0.00086721	0.000428055	0	0.000776697	0	0.000466479	0
86	Integrin beta-1 OS=Homo sapiens GN=ITGB1 PE=1 SV=2	ITB1_HUMAN	88	5.04	Homo sapiens	0.000874175	0	0.00154769	0.000620373	0.00251463	0.000468014	0	0.000452281	0.000793542	0.002243	0	0.000118969	0	0	0
87	Desmoplakin OS=Homo sapiens GN=DSP PE=1 SV=3	DESP_HUMAN	332	6.78	Homo sapiens	9.45555e-05	0	0.000295247	0.000411137	0.000190299	0	0	7.99211e-05	0.000613583	0.000212909	0	0	0	0	0
88	Apolipoprotein C-II OS=Homo sapiens GN=APOC2 PE=1 SV=1	APOC2_HUMAN	11	4.36	Homo sapiens	0.00692277	0	0.0106439	0	0.00646854	0	0	0	0	0	0.0119063	0.0064067	0.0148152	0.0113975	0.0132512
89	Ig kappa chain V-II region RPMI 6410 OS=Homo sapiens PE=4 SV=1	KV206_HUMAN	15	9.53	Homo sapiens	0	0.00409123	0.00636596	0.00667861	0.00158811	0	0.00430275	0	0.00744066	0.00403065	0	0	0	0	0
90	HLA class I histocompatibility antigen, B-7 alpha chain OS=Homo sapiens GN=HLA-B PE=1 SV=3	1B07_HUMAN	40	5.65	unknown	0.00265831	0.00200725	0.00292706	0.00113888	0.00612515	0.00102963	0	0	0.00155279	0.005691	0	0	0	0.000999014	0
91	Coagulation factor X OS=Homo sapiens GN=F10 PE=1 SV=2	FA10_HUMAN	55	5.74	Homo sapiens	0	0	0	0	0	0	0	0	0	0	0.00655109	0.00254065	0.00196271	0.00227942	0.00690721
92	C-reactive protein OS=Homo sapiens GN=CRP PE=1 SV=1	CRP_HUMAN	25	5.32	Homo sapiens	0	0	0	0	0	0	0	0	0	0	0.00696092	0.00570146	0	0.0095081	0.0163003
93	Alpha-1-antichymotrypsin OS=Homo sapiens GN=SERPINA3 PE=1 SV=2	AACT_HUMAN	48	5.19	Homo sapiens	0	0	0	0	0	0	0	0	0	0	0.00547633	0.00193846	0.00907787	0.000951266	0
94	Ig kappa chain V-IV region (Fragment) OS=Homo sapiens GN=IGKV4-1 PE=4 SV=1	KV401_HUMAN	13	4.85	Homo sapiens	0.00938683	0.0109328	0	0.00558625	0.00547433	0.00646844	0.00930296	0.00731352	0.00545715	0.00760791	0	0.00529536	0	0.00202755	0
95	Dermcidin OS=Homo sapiens GN=DCD PE=1 SV=2	DCD_HUMAN	11	6.52	Homo sapiens	0.0165998	0.0143578	0.0142282	0.00826606	0.00431028	0	0.00257757	0.005025	0.00567896	0.00715905	0.00194573	0	0	0.0023962	0
96	Complement C1r subcomponent OS=Homo sapiens GN=C1R PE=1 SV=2	C1R_HUMAN	80	6.14	Homo sapiens	0	0	0	0	0.000989263	0	0	0	0	0.000493283	0.00191263	0.00148496	0.00162967	0.00173008	0
97	Vitamin K-dependent protein C OS=Homo sapiens GN=PROC PE=1 SV=1	PROC_HUMAN	52	6.23	Homo sapiens	0	0	0	0	0	0	0	0	0	0	0.00378548	0.00254788	0.00230717	0.00228766	0
98	Ig heavy chain V-II region ARH-77 OS=Homo sapiens PE=4 SV=1	HV209_HUMAN	16	8.45	Homo sapiens	0.00570617	0.00592192	0	0.00568098	0.00393859	0	0.00524491	0.00345469	0.00479553	0.00364359	0	0	0	0	0
99	Complement C1q subcomponent subunit A OS=Homo sapiens GN=C1QA PE=1 SV=2	C1QA_HUMAN	26	9.45	Homo sapiens	0.00351149	0.00607445	0.00597245	0.00140692	0.00243128	0.00165017	0	0.00208229	0.00213737	0.00109676	0	0	0	0.000498666	0
100	Ig heavy chain V-I region HG3 OS=Homo sapiens PE=3 SV=1	HV102_HUMAN	13	9.4	Homo sapiens	0.0105345	0	0	0.008419	0	0	0	0	0.00418927	0	0	0	0	0	0
101	Ig alpha-2 chain C region OS=Homo sapiens GN=IGHA2 PE=1 SV=3	IGHA2_HUMAN	37	6.02	Homo sapiens	0	0	0.00206349	0.00615283	0	0	0	0	0.00562717	0	0	0.00212215	0	0.00301896	0
102	Thrombospondin-4 OS=Homo sapiens GN=THBS4 PE=1 SV=2	TSP4_HUMAN	106	4.23	Homo sapiens	0	0	0	0	0	0	0	0	0	0	0.00237017	0.00155721	0.000200616	0.0021175	0
103	Protein Z-dependent protease inhibitor OS=Homo sapiens GN=SERPINA10 PE=1 SV=1	ZPI_HUMAN	51	8.58	Homo sapiens	0	0	0	0	0	0	0	0	0	0	0.00492904	0.00300187	0.00233423	0.000259755	0.00236018
104	Complement factor H-related protein 1 OS=Homo sapiens GN=CFHR1 PE=1 SV=2	FHR1_HUMAN	38	7.42	Homo sapiens	0.00319084	0.00457084	0	0	0.00165958	0.00500733	0.00243396	0	0	0.00416368	0.00402009	0	0	0	0
105	Ig kappa chain V-III region VG (Fragment) OS=Homo sapiens PE=1 SV=1	KV309_HUMAN	13	4.59	Homo sapiens	0	0	0	0.00208199	0	0	0	0	0.00645486	0.00229089	0	0.00238006	0	0.00202755	0
106	Transthyretin OS=Homo sapiens GN=TTR PE=1 SV=1	TTHY_HUMAN	16	5.58	Homo sapiens	0	0	0	0	0	0	0	0	0	0	0.0102166	0.00548823	0.0169902	0.00702972	0.0162205
107	Complement component C8 alpha chain OS=Homo sapiens GN=C8A PE=1 SV=2	CO8A_HUMAN	65	6.41	Homo sapiens	0	0	0	0	0.000485109	0	0	0	0	0	0.00285393	0.00236112	0.000334293	0.00173039	0
108	Vitamin D-binding protein OS=Homo sapiens GN=GC PE=1 SV=1	VTDB_HUMAN	53	5.21	Homo sapiens	0	0	0	0	0.00208817	0	0	0	0	0	0.00102432	0.00228025	0	0.00161953	0
109	Serum amyloid P-component OS=Homo sapiens GN=APCS PE=1 SV=2	SAMP_HUMAN	25	6.52	Homo sapiens	0	0.00313894	0.00381958	0	0	0.00335934	0	0.00110423	0	0	0.00348541	0.00178891	0.00347663	0.00158423	0.010491
110	Platelet glycoprotein IX OS=Homo sapiens GN=GP9 PE=1 SV=3	GPIX_HUMAN	19	6.32	Homo sapiens	0.0072078	0.00662645	0.00616224	0.00620769	0.00707261	0	0	0	0.00441649	0	0	0	0	0.000704889	0
111	Ig kappa chain V-III region CLL OS=Homo sapiens PE=4 SV=2	KV308_HUMAN	14	8.7	unknown	0.00214769	0.00450939	0	0.00520591	0.0067642	0	0.00396895	0.00197185	0.00502129	0.00915281	0	0	0	0.00188273	0
112	Ig heavy chain V-III region WEA OS=Homo sapiens PE=1 SV=1	HV302_HUMAN	12	8.7	Homo sapiens	0	0	0	0.00375271	0	0	0	0	0.0116626	0	0	0	0	0	0
113	Ig lambda chain V-III region LOI OS=Homo sapiens PE=1 SV=1	LV302_HUMAN	12	4.72	Homo sapiens	0	0.0105653	0	0.00375658	0.00394151	0	0.0101139	0.00230049	0.00167959	0.00991108	0	0.00200974	0	0.00273674	0
114	Phosphatidylcholine-sterol acyltransferase OS=Homo sapiens GN=LCAT PE=1 SV=1	LCAT_HUMAN	50	6.04	Homo sapiens	0	0	0	0	0	0	0	0	0	0	0.00458394	0.00234416	0.00305596	0.00158141	0
115	Ig heavy chain V-I region V35 OS=Homo sapiens PE=1 SV=1	HV103_HUMAN	13	9.87	Homo sapiens	0	0	0	0.00911181	0	0	0	0.0021284	0.00545715	0.00375324	0	0	0	0.000997331	0
116	Ficolin-2 OS=Homo sapiens GN=FCN2 PE=1 SV=2	FCN2_HUMAN	34	6.77	unknown	0.000923307	0	0	0.00134123	0.00185958	0.003732	0	0	0.00205387	0.00493309	0	0	0	0	0.00940329
117	Hemoglobin subunit beta OS=Homo sapiens GN=HBB PE=1 SV=2	HBB_HUMAN	16	7.32	Homo sapiens	0	0	0	0.00568195	0.00494126	0	0	0	0	0.00251916	0	0.00397532	0.00138703	0.00455009	0
118	Ig heavy chain V-III region CAM OS=Homo sapiens PE=1 SV=1	HV307_HUMAN	14	6.5	unknown	0	0	0	0	0	0	0.00338385	0	0.0041409	0	0	0	0	0.00285433	0
119	Ig gamma-4 chain C region OS=Homo sapiens GN=IGHG4 PE=1 SV=1	IGHG4_HUMAN	36	7.41	Homo sapiens	0	0	0	0.0152142	0	0	0.0346692	0	0.0151131	0	0	0.0134917	0.0108838	0.0161403	0
120	Heat shock 70 kDa protein 1-like OS=Homo sapiens GN=HSPA1L PE=1 SV=2	HS71L_HUMAN	70	5.82	unknown	0	0.0011159	0	0	0	0	0	0.00409044	0	0	0	0	0.000465622	0	0.00507193
121	Lysozyme C OS=Homo sapiens GN=LYZ PE=1 SV=1	LYSC_HUMAN	17	9.35	Homo sapiens	0.00624813	0.00376862	0	0.00215175	0	0	0.00217903	0.00318841	0.00330686	0.00120306	0	0	0	0	0
122	Ig lambda chain V-III region SH OS=Homo sapiens PE=1 SV=1	LV301_HUMAN	11	6.5	Homo sapiens	0.00428079	0.00582423	0	0.00163754	0.00287502	0	0.00336329	0.00869197	0	0.00345647	0	0	0	0	0
123	Apolipoprotein A-II OS=Homo sapiens GN=APOA2 PE=1 SV=1	APOA2_HUMAN	11	6.6	Homo sapiens	0.00285386	0	0	0	0.00359464	0	0	0	0	0	0.00490929	0.00889216	0.00592608	0.0066117	0
124	Ig lambda chain V-I region WAH OS=Homo sapiens PE=1 SV=1	LV106_HUMAN	12	6.46	unknown	0	0.00526096	0	0.00304832	0.00131772	0	0.00315431	0.00221115	0.00520571	0.00158421	0	0.0011373	0	0	0
125	Ig heavy chain V-III region GA OS=Homo sapiens PE=1 SV=1	HV308_HUMAN	13	10.02	Homo sapiens	0	0.00243225	0	0	0.00120919	0	0.00145766	0	0	0.00152726	0	0	0	0	0
126	Complement component C8 beta chain OS=Homo sapiens GN=C8B PE=1 SV=3	CO8B_HUMAN	67	8.17	Homo sapiens	0	0	0	0	0	0	0	0	0	0	0.000977386	0.0020312	0.00145941	0.00157777	0
127	Small proline-rich protein 2A OS=Homo sapiens GN=SPRR2A PE=1 SV=1	SPR2A_HUMAN	8	8.49	unknown	0.00784811	0	0.0243389	0.0045686	0.00395316	0	0.00473147	0	0.00352038	0.00383477	0	0	0	0	0
128	Secreted phosphoprotein 24 OS=Homo sapiens GN=SPP2 PE=1 SV=1	SPP24_HUMAN	24	8.46	Homo sapiens	0	0	0	0	0	0	0	0	0	0	0.00726724	0.00609278	0	0.00467472	0
129	Filaggrin-2 OS=Homo sapiens GN=FLG2 PE=1 SV=1	FILA2_HUMAN	248	8.35	Homo sapiens	0.00036814	0.00038206	0.000308073	7.2633e-05	9.56409e-05	0	0	0.000111314	0.00031127	8.0058e-05	0	0	0	0	0
130	Apolipoprotein C-I OS=Homo sapiens GN=APOC1 PE=1 SV=1	APOC1_HUMAN	9	9.17	Homo sapiens	0.00331541	0	0	0	0.00527848	0	0	0	0	0	0	0.00630903	0	0.00291253	0
131	Ig kappa chain V-III region B6 OS=Homo sapiens PE=1 SV=1	KV301_HUMAN	12	9.53	Homo sapiens	0	0	0	0	0.00196493	0	0.00150783	0	0.00223945	0.00408066	0	0	0	0	0
132	Complement component C8 gamma chain OS=Homo sapiens GN=C8G PE=1 SV=3	CO8G_HUMAN	22	8.48	Homo sapiens	0	0	0	0	0	0.0019502	0	0	0	0	0.00496906	0.00312908	0.0044551	0.00299836	0
133	Trypsin-1 OS=Homo sapiens GN=PRSS1 PE=1 SV=1	TRY1_HUMAN	27	6.49	unknown	0.00332813	0	0	0	0.00175604	0.00238358	0.000700082	0	0.000497656	0.00143944	0	0	0	0	0
134	Sorbin and SH3 domain-containing protein 2 OS=Homo sapiens GN=SORBS2 PE=1 SV=3	SRBS2_HUMAN	124	8.42	unknown	0	0	0	0	0.000190154	0	0	0	0	0	0	0	0	0	0
135	Keratin, type II cuticular Hb5 OS=Homo sapiens GN=KRT85 PE=1 SV=1	KRT85_HUMAN	56	6.49	unknown	0	0.00589879	0	0	0	0.000735451	0	0.00365105	0	0	0	0	0	0	0
136	Galectin-3-binding protein OS=Homo sapiens GN=LGALS3BP PE=1 SV=1	LG3BP_HUMAN	65	4.9	unknown	0	0.00122085	0	0.00182236	0	0	0	0	0.000748846	0	0.00117811	0.000241599	0.000490738	0.000403274	0
137	Alpha-1-acid glycoprotein 1 OS=Homo sapiens GN=ORM1 PE=1 SV=1	A1AG1_HUMAN	24	4.66	Homo sapiens	0.00256084	0	0	0	0.000661711	0	0	0	0	0	0.000891795	0.000572385	0.00227309	0.00247536	0
138	Vitamin K-dependent protein Z OS=Homo sapiens GN=PROZ PE=1 SV=2	PROZ_HUMAN	45	5.87	Homo sapiens	0	0	0	0	0	0	0	0	0	0	0.00315056	0.0029462	0.00194176	0	0
139	Solute carrier family 2, facilitated glucose transporter member 3 OS=Homo sapiens GN=SLC2A3 PE=2 SV=1	GTR3_HUMAN	54	7.24	Homo sapiens	0	0	0.00254487	0.00101098	0.00175668	0	0	0	0.000776974	0.00183153	0	0	0	0	0
140	Desmocollin-1 OS=Homo sapiens GN=DSC1 PE=1 SV=2	DSC1_HUMAN	100	5.08	Homo sapiens	0.000313924	0	0.000382277	0.000365488	0.00039541	0	0	0	0.000339486	0	0	0	0	0	0
141	ATP synthase subunit beta, mitochondrial OS=Homo sapiens GN=ATP5B PE=1 SV=3	ATPB_HUMAN	57	5.07	Homo sapiens	0	0	0	0.000632578	0.00110557	0	0.000332448	0.00215286	0.000736081	0.000333519	0	0	0	0	0
142	Prenylcysteine oxidase 1 OS=Homo sapiens GN=PCYOX1 PE=1 SV=3	PCYOX_HUMAN	57	6.1	unknown	0	0	0	0.000949138	0.000830174	0	0.0011323	0	0.000736081	0.000681841	0	0	0	0.000694837	0
143	Phosphatidylinositol-glycan-specific phospholipase D OS=Homo sapiens GN=GPLD1 PE=1 SV=3	PHLD_HUMAN	92	6.33	unknown	0	0	0	0	0	0	0	0	0	0	0.000711792	0.000822917	0.00212314	0.000145575	0
144	Keratin, type II cytoskeletal 6C OS=Homo sapiens GN=KRT6C PE=1 SV=3	K2C6C_HUMAN	60	8.16	Homo sapiens	0	0	0.0192179	0.00686076	0.0123792	0	0.00252029	0	0.00908568	0	0	0	0	0	0
145	Ig heavy chain V-III region BUT OS=Homo sapiens PE=1 SV=1	HV306_HUMAN	12	9.48	Homo sapiens	0	0	0	0	0.00789831	0	0.0155299	0	0	0.0106783	0	0	0	0	0
146	Hemopexin OS=Homo sapiens GN=HPX PE=1 SV=2	HEMO_HUMAN	52	7.02	Homo sapiens	0	0	0	0	0	0	0	0	0	0	0.00209954	0.00228456	0	0.00126985	0
147	Neutrophil defensin 1 OS=Homo sapiens GN=DEFA1 PE=1 SV=1	DEF1_HUMAN	10	7.04	Homo sapiens	0	0	0	0.0018044	0.00315321	0	0.00653968	0	0.00355262	0	0	0	0	0	0
148	Lipocalin-1 OS=Homo sapiens GN=LCN1 PE=1 SV=1	LCN1_HUMAN	19	5.3	unknown	0.00720177	0	0	0.00192525	0	0	0.000997345	0	0	0	0	0	0	0	0
149	Alpha-2-HS-glycoprotein OS=Homo sapiens GN=AHSG PE=1 SV=1	FETUA_HUMAN	39	5.52	Homo sapiens	0	0	0	0	0	0	0	0	0	0	0.00251865	0.00225043	0.000545264	0	0
150	Mannan-binding lectin serine protease 1 OS=Homo sapiens GN=MASP1 PE=1 SV=3	MASP1_HUMAN	79	5.18	Homo sapiens	0	0	0	0	0	0	0	0	0	0	0.00179957	0.000958333	0.000544232	0.000745674	0
151	Ig kappa chain V-III region NG9 (Fragment) OS=Homo sapiens PE=2 SV=1	KV303_HUMAN	11	9.53	unknown	0	0	0	0.00409386	0.00287502	0	0.00164491	0	0.0030538	0	0	0	0	0	0
152	Hemoglobin subunit alpha OS=Homo sapiens GN=HBA1 PE=1 SV=2	HBA_HUMAN	15	9.09	Homo sapiens	0	0	0	0.00185358	0.00317165	0	0	0	0	0	0	0	0	0	0
153	14-3-3 protein zeta/delta OS=Homo sapiens GN=YWHAZ PE=1 SV=1	1433Z_HUMAN	28	4.43	Homo sapiens	0	0	0	0	0	0	0	0	0	0	0	0.00283406	0	0.00307577	0.00205129
154	Glyceraldehyde-3-phosphate dehydrogenase OS=Homo sapiens GN=GAPDH PE=1 SV=3	G3P_HUMAN	36	8.73	Homo sapiens	0	0	0	0.00100158	0.000436651	0	0	0.00529687	0.000782307	0	0	0	0	0	0.0105835
155	Beta-Ala-His dipeptidase OS=Homo sapiens GN=CNDP1 PE=1 SV=4	CNDP1_HUMAN	57	4.95	unknown	0	0	0	0	0	0	0	0	0	0	0	0.000480436	0.00458265	0	0
156	CD9 antigen OS=Homo sapiens GN=CD9 PE=1 SV=4	CD9_HUMAN	25	7.19	Homo sapiens	0	0	0	0.00146319	0.00126402	0	0	0	0.00108921	0	0	0	0	0	0
157	Calmodulin-like protein 5 OS=Homo sapiens GN=CALML5 PE=1 SV=2	CALL5_HUMAN	16	4.05	Homo sapiens	0.00855926	0	0	0	0	0	0	0	0	0	0	0	0	0	0
158	Complement C4-B OS=Homo sapiens GN=C4B PE=1 SV=2	CO4B_HUMAN	193	7.28	Homo sapiens	0	0	0	0	0	0	0	0	0	0	0	0.0103371	0	0.010637	0
159	Tubulin beta-1 chain OS=Homo sapiens GN=TUBB1 PE=1 SV=1	TBB1_HUMAN	50	4.82	Homo sapiens	0	0	0	0	0	0	0	0	0.000413807	0	0	0.00158708	0	0.00224096	0
160	Ig kappa chain V-I region DEE OS=Homo sapiens PE=1 SV=1	KV105_HUMAN	12	8.46	Homo sapiens	0	0	0	0	0.00132342	0	0	0	0.00397851	0	0	0	0	0	0
161	Junction plakoglobin OS=Homo sapiens GN=JUP PE=1 SV=3	PLAK_HUMAN	82	6.05	Homo sapiens	0	0	0.000466191	0.000446095	0.000481222	0	0	0	0.000759635	0.000473963	0	0	0	0	0
162	Talin-1 OS=Homo sapiens GN=TLN1 PE=1 SV=3	TLN1_HUMAN	270	5.94	Homo sapiens	0	0	0	0	5.85653e-05	0	0	0	0	0	0	0	0	0.000121633	0
163	Elongation factor 1-alpha 2 OS=Homo sapiens GN=EEF1A2 PE=1 SV=1	EF1A2_HUMAN	50	9.5	unknown	0	0	0	0	0	0	0	0.00380366	0	0	0	0	0.00043458	0	0.00125866
164	Tubulin alpha-4A chain OS=Homo sapiens GN=TUBA4A PE=1 SV=1	TBA4A_HUMAN	50	4.69	Homo sapiens	0	0	0	0	0	0	0	0	0	0	0	0.0014497	0	0.00157995	0
165	Lumican OS=Homo sapiens GN=LUM PE=1 SV=2	LUM_HUMAN	38	6.6	Homo sapiens	0	0	0	0	0	0	0	0	0	0	0.00172329	0.00131467	0.00285297	0.00190829	0
166	von Willebrand factor OS=Homo sapiens GN=VWF PE=1 SV=4	VWF_HUMAN	309	5.15	Homo sapiens	9.65654e-05	0	0	0	0.000332468	0	0	0	0	0.000350835	0	0	0	0	0
167	Platelet glycoprotein Ib beta chain OS=Homo sapiens GN=GP1BB PE=1 SV=1	GP1BB_HUMAN	22	9.37	Homo sapiens	0	0	0.00184911	0	0.00144062	0	0	0	0	0	0	0	0	0	0
168	HLA class I histocompatibility antigen, A-11 alpha chain OS=Homo sapiens GN=HLA-A PE=1 SV=1	1A11_HUMAN	41	6.06	unknown	0	0	0	0	0.00481964	0	0	0	0.00271082	0	0	0	0	0	0
169	Mannan-binding lectin serine protease 2 OS=Homo sapiens GN=MASP2 PE=1 SV=4	MASP2_HUMAN	76	5.37	Homo sapiens	0	0	0	0	0	0	0	0	0	0	0	0.000137754	0.00200135	0.000869802	0
170	Amyloid beta A4 protein OS=Homo sapiens GN=APP PE=1 SV=3	A4_HUMAN	87	4.45	Homo sapiens	0	0	0	0	0	0	0	0	0	0	0	0.000652658	0	0.000683692	0.00201827
171	Voltage-dependent anion-selective channel protein 3 OS=Homo sapiens GN=VDAC3 PE=1 SV=1	VDAC3_HUMAN	31	8.9	Homo sapiens	0	0	0	0	0.00203653	0	0	0	0.00135344	0	0	0	0	0	0
172	Keratin, type II cuticular Hb6 OS=Homo sapiens GN=KRT86 PE=1 SV=1	KRT86_HUMAN	53	5.35	unknown	0	0.0036186	0	0	0	0	0	0.00409911	0	0	0	0	0	0	0
173	Resistin OS=Homo sapiens GN=RETN PE=2 SV=1	RETN_HUMAN	11	6.89	Homo sapiens	0.00558728	0	0	0	0	0.00763486	0	0	0.00256028	0.00358751	0	0	0	0	0
174	Band 3 anion transport protein OS=Homo sapiens GN=SLC4A1 PE=1 SV=3	B3AT_HUMAN	102	4.84	Homo sapiens	0	0.000618936	0	0.000535223	0	0	0	0	0.000617009	0	0	0	0	0	0
175	Filaggrin OS=Homo sapiens GN=FLG PE=1 SV=3	FILA_HUMAN	435	9.6	Homo sapiens	0.000172013	0	0	0	9.10345e-05	0	0	0	9.6452e-05	0.000112166	0	0	0	0	0
176	Alpha-actinin-1 OS=Homo sapiens GN=ACTN1 PE=1 SV=2	ACTN1_HUMAN	103	5.07	Homo sapiens	0	0	0	0	0	0	0	0	0	0	0	0.000668347	0	0.000768379	0
177	Keratin, type I cuticular Ha1 OS=Homo sapiens GN=KRT31 PE=1 SV=3	K1H1_HUMAN	47	4.53	unknown	0	0.00570274	0	0	0	0	0	0.00288112	0	0	0	0	0	0	0
178	Pleckstrin OS=Homo sapiens GN=PLEK PE=1 SV=3	PLEK_HUMAN	40	8.45	Homo sapiens	0	0	0	0	0.00138182	0	0	0	0.000712997	0.00197621	0	0	0	0	0
179	Calreticulin OS=Homo sapiens GN=CALR PE=1 SV=1	CALR_HUMAN	48	4.04	Homo sapiens	0	0	0	0	0	0	0	0	0	0	0	0.00157726	0	0.00109968	0
180	Integrin alpha-2 OS=Homo sapiens GN=ITGA2 PE=1 SV=1	ITA2_HUMAN	129	4.95	unknown	0	0	0	0	0.000919751	0	0	0	0	0.000536777	0	0	0	0	0
181	Serglycin OS=Homo sapiens GN=SRGN PE=1 SV=3	SRGN_HUMAN	18	4.57	Homo sapiens	0	0	0	0	0	0	0	0	0	0	0	0.00210301	0	0.00108044	0.0261355
182	ATP synthase subunit alpha, mitochondrial OS=Homo sapiens GN=ATP5A1 PE=1 SV=1	ATPA_HUMAN	60	9.56	Homo sapiens	0	0	0	0	0.00026199	0	0	0	0	0.000340868	0	0	0	0	0
183	Gelsolin OS=Homo sapiens GN=GSN PE=1 SV=1	GELS_HUMAN	86	6.19	Homo sapiens	0	0	0	0	0	0	0	0	0	0	0.000257956	0	0.00138695	0.000387637	0
184	Alpha-2-antiplasmin OS=Homo sapiens GN=SERPINF2 PE=1 SV=3	A2AP_HUMAN	55	6.24	Homo sapiens	0	0	0	0	0	0	0	0	0	0	0.00119063	0.000937211	0	0.000832761	0
185	Ig kappa chain V-III region IARC/BL41 OS=Homo sapiens PE=4 SV=1	KV311_HUMAN	14	4.59	unknown	0	0	0	0.00132399	0	0	0	0	0.00157782	0	0	0	0	0	0
186	Apolipoprotein C-IV OS=Homo sapiens GN=APOC4 PE=1 SV=1	APOC4_HUMAN	15	9.13	Homo sapiens	0	0	0.00254851	0	0	0	0	0	0	0	0	0	0	0.00175721	0
187	Lipopolysaccharide-binding protein OS=Homo sapiens GN=LBP PE=1 SV=3	LBP_HUMAN	53	6.68	Homo sapiens	0	0	0	0	0	0.00239411	0	0	0	0.00223838	0	0	0	0	0
188	Polymeric immunoglobulin receptor OS=Homo sapiens GN=PIGR PE=1 SV=4	PIGR_HUMAN	83	5.43	unknown	0.00036226	0	0	0.000657744	0	0	0	0	0	0	0	0	0	0	0
189	Serum amyloid A-4 protein OS=Homo sapiens GN=SAA4 PE=1 SV=2	SAA4_HUMAN	15	9.38	Homo sapiens	0	0	0	0	0	0	0	0	0	0	0	0.00160779	0.00286629	0.00529501	0
190	Serine/threonine-protein kinase N3 OS=Homo sapiens GN=PKN3 PE=1 SV=1	PKN3_HUMAN	99	8.56	unknown	0	0	0	0.000181949	0	0	0	0	0	0	0	0	0	0	0
191	Isocitrate dehydrogenase [NADP], mitochondrial OS=Homo sapiens GN=IDH2 PE=1 SV=2	IDHP_HUMAN	51	8.95	Homo sapiens	0	0	0.00074852	0	0	0	0	0	0	0	0	0	0	0.000262606	0
192	Alpha-1-acid glycoprotein 2 OS=Homo sapiens GN=ORM2 PE=1 SV=2	A1AG2_HUMAN	24	4.76	Homo sapiens	0	0	0	0	0	0	0	0	0	0	0.00181614	0	0.00179143	0	0
193	HLA class I histocompatibility antigen, B-56 alpha chain OS=Homo sapiens GN=HLA-B PE=1 SV=1	1B56_HUMAN	40	6.06	unknown	0	0	0	0.00160344	0.00553163	0	0	0	0.00192815	0	0	0	0	0	0
194	Leukocyte surface antigen CD47 OS=Homo sapiens GN=CD47 PE=1 SV=1	CD47_HUMAN	35	7.27	Homo sapiens	0	0	0	0	0	0	0	0	0.000394102	0	0	0	0	0	0
195	Protein S100-A7 OS=Homo sapiens GN=S100A7 PE=1 SV=4	S10A7_HUMAN	11	6.78	Homo sapiens	0.0110935	0	0.00717346	0	0	0	0	0	0	0	0	0	0	0	0
196	Adenosylhomocysteinase OS=Homo sapiens GN=AHCY PE=1 SV=4	SAHH_HUMAN	48	6.29	unknown	0	0	0	0	0	0	0	0.00284475	0	0	0	0	0	0	0
197	Tubulin beta chain OS=Homo sapiens GN=TUBB PE=1 SV=2	TBB5_HUMAN	50	4.52	Homo sapiens	0	0	0	0	0	0	0	0	0	0	0	0.00103093	0	0.00118535	0
198	Suprabasin OS=Homo sapiens GN=SBSN PE=1 SV=2	SBSN_HUMAN	61	7.01	Homo sapiens	0.0014967	0	0	0.000295295	0.000259223	0	0	0	0.000220274	0	0	0	0	0	0
199	Protein S100-A8 OS=Homo sapiens GN=S100A8 PE=1 SV=1	S10A8_HUMAN	11	7.07	Homo sapiens	0.00544603	0	0.00717346	0	0	0	0	0	0	0	0	0	0	0	0
200	Integrin alpha-6 OS=Homo sapiens GN=ITGA6 PE=1 SV=5	ITA6_HUMAN	127	6.57	Homo sapiens	0	0	0	0	0.000248823	0	0	0	0.000330367	0	0	0	0	0	0
201	Keratin, type II cytoskeletal 6B OS=Homo sapiens GN=KRT6B PE=1 SV=5	K2C6B_HUMAN	60	8.16	unknown	0	0	0	0	0.00395316	0	0	0	0.00897073	0	0	0	0	0	0
202	Heat shock protein HSP 90-alpha OS=Homo sapiens GN=HSP90AA1 PE=1 SV=5	HS90A_HUMAN	85	4.66	Homo sapiens	0	0	0	0	0	0	0	0	0	0	0	0.00052615	0	0.000152533	0
203	Histone H4 OS=Homo sapiens GN=HIST1H4A PE=1 SV=2	H4_HUMAN	11	11.91	unknown	0	0	0	0	0.00143751	0	0	0.00989806	0	0.00180494	0	0	0	0	0
204	Protein S100-A9 OS=Homo sapiens GN=S100A9 PE=1 SV=1	S10A9_HUMAN	13	6.07	unknown	0.00229529	0	0	0	0	0	0	0	0	0.00757545	0	0	0	0	0
205	Selenoprotein P OS=Homo sapiens GN=SEPP1 PE=1 SV=3	SEPP1_HUMAN	43	7.92	Homo sapiens	0	0	0	0	0	0	0	0	0	0	0.0015229	0.000636858	0	0	0
206	Desmoglein-1 OS=Homo sapiens GN=DSG1 PE=1 SV=2	DSG1_HUMAN	114	4.66	Homo sapiens	0	0	0	0.000560182	0	0	0	0	0.000117866	0	0	0	0	0	0
207	Ig kappa chain V-II region TEW OS=Homo sapiens PE=1 SV=1	KV204_HUMAN	12	8.85	Homo sapiens	0	0	0	0	0	0	0	0	0.00306799	0	0	0	0	0	0
208	Apolipoprotein F OS=Homo sapiens GN=APOF PE=1 SV=2	APOF_HUMAN	35	5.36	Homo sapiens	0	0	0	0	0	0	0	0	0	0	0	0.000448684	0.000620829	0.000573981	0
209	Inter-alpha-trypsin inhibitor heavy chain H4 OS=Homo sapiens GN=ITIH4 PE=1 SV=4	ITIH4_HUMAN	103	6.97	Homo sapiens	0	0	0	0	0	0	0	0	0	0	0	0	0.00042192	0.000258644	0
210	Platelet basic protein OS=Homo sapiens GN=PPBP PE=1 SV=3	CXCL7_HUMAN	14	9.07	Homo sapiens	0	0	0	0	0	0	0	0	0	0.0013579	0	0	0	0	0
211	Collectin-11 OS=Homo sapiens GN=COLEC11 PE=1 SV=1	COL11_HUMAN	29	5.06	Homo sapiens	0	0	0	0	0	0	0	0	0	0	0	0.00130532	0	0.00136571	0
212	Extracellular superoxide dismutase [Cu-Zn] OS=Homo sapiens GN=SOD3 PE=1 SV=2	SODE_HUMAN	26	6.59	Homo sapiens	0	0	0	0	0	0	0	0	0	0	0	0.00139653	0	0.000515111	0
213	Fibulin-1 OS=Homo sapiens GN=FBLN1 PE=1 SV=4	FBLN1_HUMAN	77	4.86	Homo sapiens	0	0	0	0	0	0	0	0	0	0	0	0	0.000288214	0.000596661	0
214	Myosin light polypeptide 6 OS=Homo sapiens GN=MYL6 PE=1 SV=2	MYL6_HUMAN	17	4.29	Homo sapiens	0	0	0	0	0	0	0	0	0	0	0	0.00142391	0	0.00235062	0
215	Keratin, type II cuticular Hb4 OS=Homo sapiens GN=KRT84 PE=2 SV=2	KRT84_HUMAN	65	7.61	unknown	0	0	0	0	0	0	0	0.00294141	0	0	0	0	0	0	0
216	Amine oxidase [flavin-containing] B OS=Homo sapiens GN=MAOB PE=1 SV=3	AOFB_HUMAN	59	7.55	unknown	0	0	0	0.000925301	0.000266431	0	0	0	0.000227741	0	0	0	0	0	0
217	Angiotensinogen OS=Homo sapiens GN=AGT PE=1 SV=1	ANGT_HUMAN	53	6.27	Homo sapiens	0	0	0	0	0	0	0	0	0	0	0.00143748	0	0.000418726	0.000252696	0
218	Disintegrin and metalloproteinase domain-containing protein 10 OS=Homo sapiens GN=ADAM10 PE=1 SV=1	ADA10_HUMAN	84	7.81	Homo sapiens	0	0	0	0	0.000377306	0	0	0	0	0	0	0	0	0	0
219	GTP-binding nuclear protein Ran OS=Homo sapiens GN=RAN PE=1 SV=3	RAN_HUMAN	24	7.59	Homo sapiens	0	0	0	0	0	0	0	0.00453661	0	0	0	0	0	0	0
220	Ig kappa chain V-I region Scw OS=Homo sapiens PE=1 SV=1	KV117_HUMAN	12	8.85	unknown	0	0	0	0.00525379	0	0	0.00603132	0	0	0	0	0	0	0	0
221	Coagulation factor XII OS=Homo sapiens GN=F12 PE=1 SV=3	FA12_HUMAN	68	7.76	Homo sapiens	0	0	0	0	0	0	0	0	0.000216564	0	0	0	0	0	0
222	Ig kappa chain V-III region GOL OS=Homo sapiens PE=1 SV=1	KV307_HUMAN	12	9.53	unknown	0	0	0	0	0	0	0.0094511	0	0	0	0	0	0	0	0
223	Tubulin alpha-1B chain OS=Homo sapiens GN=TUBA1B PE=1 SV=1	TBA1B_HUMAN	50	4.7	Homo sapiens	0	0	0	0	0	0	0	0	0	0	0	0.00161886	0	0.00118398	0
224	Alpha-enolase OS=Homo sapiens GN=ENO1 PE=1 SV=2	ENOA_HUMAN	47	7.46	Homo sapiens	0	0	0	0	0	0	0	0.00203497	0	0	0	0	0	0	0
225	Fatty acid-binding protein, epidermal OS=Homo sapiens GN=FABP5 PE=1 SV=3	FABP5_HUMAN	15	7.05	Homo sapiens	0.00408208	0	0	0	0	0	0	0	0	0	0	0	0	0	0
226	Alpha-1B-glycoprotein OS=Homo sapiens GN=A1BG PE=1 SV=4	A1BG_HUMAN	54	5.71	Homo sapiens	0	0	0	0	0	0	0	0	0	0	0	0.000290814	0	0	0
227	Prolactin-inducible protein OS=Homo sapiens GN=PIP PE=1 SV=1	PIP_HUMAN	17	8.18	unknown	0.0071392	0	0	0	0	0	0	0	0	0	0	0	0	0	0
228	Four and a half LIM domains protein 1 OS=Homo sapiens GN=FHL1 PE=1 SV=4	FHL1_HUMAN	36	9.15	unknown	0	0	0	0	0.00043924	0	0	0	0	0.00273558	0	0	0	0	0
229	Platelet glycoprotein Ib alpha chain OS=Homo sapiens GN=GP1BA PE=1 SV=2	GP1BA_HUMAN	72	6.24	Homo sapiens	0	0	0	0	0	0	0	0	0	0	0	0.000525752	0	0.000640116	0
230	Retinol-binding protein 4 OS=Homo sapiens GN=RBP4 PE=1 SV=3	RET4_HUMAN	23	5.85	Homo sapiens	0	0	0	0	0	0	0	0	0	0	0	0	0.00141711	0	0
231	Fermitin family homolog 3 OS=Homo sapiens GN=FERMT3 PE=1 SV=1	URP2_HUMAN	76	6.98	Homo sapiens	0	0	0	0	0	0	0	0	0	0	0	0.000386205	0	0	0
232	Collagen alpha-1(XXI) chain OS=Homo sapiens GN=COL21A1 PE=2 SV=1	COLA1_HUMAN	99	8.48	unknown	0	0	0	0	0	0	0	0.000268018	0	0	0	0	0	0	0
233	40S ribosomal protein S13 OS=Homo sapiens GN=RPS13 PE=1 SV=2	RS13_HUMAN	17	11.19	unknown	0	0	0	0	0	0	0	0.00562608	0	0	0	0	0	0	0
234	Histone H2A type 1-C OS=Homo sapiens GN=HIST1H2AC PE=1 SV=3	H2A1C_HUMAN	14	11.66	unknown	0	0	0	0	0	0	0	0.00387164	0	0	0	0	0	0	0
235	Beta-2-microglobulin OS=Homo sapiens GN=B2M PE=1 SV=1	B2MG_HUMAN	14	6.51	Homo sapiens	0	0	0	0	0.00169421	0	0	0	0	0	0	0	0	0	0
236	Ras-related protein Rab-10 OS=Homo sapiens GN=RAB10 PE=1 SV=1	RAB10_HUMAN	23	8.61	Homo sapiens	0	0	0	0	0	0	0	0	0	0	0	0	0	0.000575978	0
237	Serum amyloid A-2 protein OS=Homo sapiens GN=SAA2 PE=1 SV=1	SAA2_HUMAN	14	9.48	Homo sapiens	0	0	0	0	0	0	0	0	0	0	0	0	0	0.0023812	0
238	HLA class I histocompatibility antigen, B-40 alpha chain OS=Homo sapiens GN=HLA-B PE=1 SV=1	1B40_HUMAN	41	6.51	unknown	0	0	0	0	0.00617171	0	0	0	0	0	0	0	0	0	0
239	Voltage-dependent anion-selective channel protein 2 OS=Homo sapiens GN=VDAC2 PE=1 SV=2	VDAC2_HUMAN	32	7.65	unknown	0	0	0	0	0.000987516	0	0	0	0	0	0	0	0	0	0
240	Collectin-10 OS=Homo sapiens GN=COLEC10 PE=2 SV=2	COL10_HUMAN	31	7.39	Homo sapiens	0	0	0	0	0	0	0	0	0	0	0	0.000337719	0.000685978	0	0
241	tRNA-dihydrouridine(47) synthase [NAD(P)(+)]-like OS=Homo sapiens GN=DUS3L PE=1 SV=2	DUS3L_HUMAN	72	8.4	unknown	0	0	0	0	0	0	0	0	0.000204533	0	0	0	0	0	0
242	Cathelicidin antimicrobial peptide OS=Homo sapiens GN=CAMP PE=1 SV=1	CAMP_HUMAN	19	10.03	Homo sapiens	0	0	0	0	0.00207325	0	0	0	0	0	0	0	0	0	0
243	Barrier-to-autointegration factor OS=Homo sapiens GN=BANF1 PE=1 SV=1	BAF_HUMAN	10	5.88	unknown	0	0	0	0	0	0	0	0	0	0.00489679	0	0	0	0	0
244	IQ and AAA domain-containing protein 1-like OS=Homo sapiens GN=IQCA1L PE=3 SV=2	IQCAL_HUMAN	95	9.79	unknown	0	0	0.000830611	0	0	0	0	0	0	0	0	0	0	0	0
245	10 kDa heat shock protein, mitochondrial OS=Homo sapiens GN=HSPE1 PE=1 SV=2	CH10_HUMAN	11	9.49	unknown	0	0	0	0	0.00142904	0	0	0	0	0	0	0	0	0	0
246	40S ribosomal protein S9 OS=Homo sapiens GN=RPS9 PE=1 SV=3	RS9_HUMAN	23	11.32	unknown	0	0	0	0	0	0	0	0.00120301	0	0	0	0	0	0	0
247	Caspase-14 OS=Homo sapiens GN=CASP14 PE=1 SV=2	CASPE_HUMAN	28	5.28	unknown	0.00213951	0	0	0	0	0	0	0	0	0	0	0	0	0	0
248	SPARC OS=Homo sapiens GN=SPARC PE=1 SV=1	SPRC_HUMAN	35	4.47	Homo sapiens	0	0	0	0	0	0	0	0	0	0	0	0.000691615	0	0	0
249	Tropomyosin beta chain OS=Homo sapiens GN=TPM2 PE=1 SV=1	TPM2_HUMAN	33	4.36	unknown	0	0	0	0	0	0	0	0	0	0	0	0.00190351	0	0	0
250	L-lactate dehydrogenase A chain OS=Homo sapiens GN=LDHA PE=1 SV=2	LDHA_HUMAN	37	8.45	unknown	0	0	0	0	0	0	0	0.000747815	0	0	0	0	0	0	0
251	Endonuclease domain-containing 1 protein OS=Homo sapiens GN=ENDOD1 PE=1 SV=2	ENDD1_HUMAN	55	5.38	Homo sapiens	0	0	0	0	0	0	0	0	0.000762847	0	0	0	0	0	0
252	Thioredoxin-dependent peroxide reductase, mitochondrial OS=Homo sapiens GN=PRDX3 PE=1 SV=3	PRDX3_HUMAN	28	7.88	Homo sapiens	0	0	0	0	0.000561408	0	0	0	0	0	0	0	0	0	0
253	Choline transporter-like protein 1 OS=Homo sapiens GN=SLC44A1 PE=1 SV=1	CTL1_HUMAN	73	8.69	unknown	0	0	0	0	0.000215335	0	0	0	0	0	0	0	0	0	0
254	Junctional adhesion molecule A OS=Homo sapiens GN=F11R PE=1 SV=1	JAM1_HUMAN	33	8.02	Homo sapiens	0	0	0	0	0.00047917	0	0	0	0	0	0	0	0	0	0
255	Ras-related protein Rap-1A OS=Homo sapiens GN=RAP1A PE=1 SV=1	RAP1A_HUMAN	21	6.55	unknown	0	0	0	0	0	0	0	0	0	0	0	0.000654155	0	0	0
256	Aggrecan core protein OS=Homo sapiens GN=ACAN PE=1 SV=2	PGCA_HUMAN	250	3.82	Homo sapiens	0	0	0	0	0	0	0	0	0	0	0	0	0	5.35716e-05	0
257	Tropomyosin alpha-1 chain OS=Homo sapiens GN=TPM1 PE=1 SV=2	TPM1_HUMAN	33	4.39	Homo sapiens	0	0	0	0	0	0	0	0	0	0	0	0.000827129	0	0	0
258	Lactotransferrin OS=Homo sapiens GN=LTF PE=1 SV=6	TRFL_HUMAN	78	8.17	unknown	0	0	0	0	0	0	0.000363504	0	0	0	0	0	0	0	0
259	Complement component C6 OS=Homo sapiens GN=C6 PE=1 SV=3	CO6_HUMAN	105	6.74	Homo sapiens	0	0	0	0	0	0	0	0	0	0	0	0	0.000211357	0	0
260	Synaptotagmin-like protein 4 OS=Homo sapiens GN=SYTL4 PE=1 SV=2	SYTL4_HUMAN	76	9.42	Homo sapiens	0	0	0	0	0	0	0	0.000363235	0	0	0	0	0	0	0
261	60S ribosomal protein L12 OS=Homo sapiens GN=RPL12 PE=1 SV=1	RL12_HUMAN	18	10.11	unknown	0	0	0	0	0	0	0	0.00153718	0	0	0	0	0	0	0
262	60 kDa heat shock protein, mitochondrial OS=Homo sapiens GN=HSPD1 PE=1 SV=2	CH60_HUMAN	61	5.55	Homo sapiens	0	0	0	0	0	0	0	0.000453593	0	0	0	0	0	0	0
263	Complement factor B OS=Homo sapiens GN=CFB PE=1 SV=2	CFAB_HUMAN	86	7.07	Homo sapiens	0	0	0	0	0.000182784	0	0	0	0	0	0	0	0	0	0
264	Latent-transforming growth factor beta-binding protein 1 OS=Homo sapiens GN=LTBP1 PE=1 SV=4	LTBP1_HUMAN	187	5.85	Homo sapiens	0	0	0	0	8.45595e-05	0	0	0	0	0	0	0	0	0	0

## Sheet: TOP25
						CHOL					DOPG					DOTAP
						21.917	21.119	17.097	36.6412	42.1832	15.7675	35.765	24.4563	47.7391	33.7475	30.5481	53.6856	30.6904	50.507	11.4244
#	Identified Proteins (264)	Accession Number	Molecular Weight	pI	Taxonomy	CHOL_A	CHOL_B	CHOL_C	CHOL_D	CHOL_E	DOPG_A	DOPG_B	DOPG_C	DOPG_D	DOPG_E	DOTAP_A	DOTAP_B	DOTAP_C	DOTAP_D	DOTAP_E
16	Apolipoprotein D OS=Homo sapiens GN=APOD PE=1 SV=1	APOD_HUMAN	21	4.79	Homo sapiens	0.0187426	0.023352	0.0261186	0.0212012	0.0214581	0.0231117	0.0252692	0.0181367	0.0130225	0.0211847	0.0462653	0.0239299	0.0692926	0.0219876	0.109065
9	C4b-binding protein alpha chain OS=Homo sapiens GN=C4BPA PE=1 SV=2	C4BPA_HUMAN	67	7.31	Homo sapiens	0.0149464	0.0157649	0.009059	0.0162918	0.00577978	0.00694786	0.00194611	0.00467762	0.010235	0.0041025	0.0398818	0.0323008	0.0358158	0.029651	0.0799979				0	0	0	0	0	0	0	0	0	0	0	0	0	0	0				0	0	0	0	0	0	0	0
26	Ig lambda-2 chain C regions OS=Homo sapiens GN=IGLC2 PE=1 SV=1	LAC2_HUMAN	11	7.34	Homo sapiens	0.0691221	0.0817501	0.0850395	0.0603536	0.0610605	0.0998485	0.0762896	0.0892488	0.0559596	0.069134	0.0516458	0.0372257	0.0513382	0.0262	0.0740996				0.134454	0.139974	0.143098	0.129994	0.125761	0.187609	0.141388	0.150529	0.130338	0.144599	0.0819615	0.0782632	0.0715155	0.102967	0.117963				0.00627134	0.0103023	0.00731545	0.00627408	0.00739542	0.00518599	0.00409411	0.00779223
4	Vitronectin OS=Homo sapiens GN=VTN PE=1 SV=1	VTNC_HUMAN	54	5.54	Homo sapiens	0.00421453	0.00320019	0.00254585	0.00269423	0.00146172	0	0.00484509	0.00302996	0.002595	0.00511911	0.0780435	0.0679082	0.103465	0.0614438	0.0596131				0.218523	0.237489	0.237197	0.206639	0.192601	0.294406	0.219623	0.244455	0.196533	0.217835	0.173489	0.14779	0.158669	0.158818	0.27206				0.00627134	0.0103023	0.00731545	0.00627408	0.00739542	0.00518599	0.00409411	0.00779223
2	Ig gamma-1 chain C region OS=Homo sapiens GN=IGHG1 PE=1 SV=1	IGHG1_HUMAN	36	8.31	Homo sapiens	0.0721767	0.0762075	0.0824366	0.081613	0.0845	0.119219	0.0897891	0.0924341	0.0860366	0.0941207	0.0336194	0.0464316	0.032587	0.0702498	0.0423178				0.297181	0.30973	0.315291	0.280446	0.249463	0.36712	0.260108	0.317083	0.251276	0.27169	0.281924	0.224944	0.231673	0.227819	0.371027				0.00627134	0.0103023	0.00731545	0.00627408	0.00739542	0.00518599	0.00409411	0.00779223
6	Keratin, type II cytoskeletal 1 OS=Homo sapiens GN=KRT1 PE=1 SV=6	K2C1_HUMAN	66	8.33	Homo sapiens	0.0382572	0.0353776	0.0387383	0.0263221	0.0214348	0.0346164	0.019352	0.0326479	0.0257108	0.0272522	0.0134102	0.00954489	0.0121708	0.0125133	0.0337739				0.463839	0.446885	0.46783	0.446005	0.424874	0.561255	0.445089	0.525727	0.425137	0.449057	0.512794	0.497724	0.500961	0.470272	0.574026				0.00627134	0.0103023	0.00731545	0.00627408	0.00739542	0.00518599	0.00409411	0.00779223
52	Apolipoprotein C-III OS=Homo sapiens GN=APOC3 PE=1 SV=1	APOC3_HUMAN	11	5.04	Homo sapiens	0.0110831	0.00287448	0.0141167	0.00416797	0.00646543	0	0	0	0.00133876	0	0.0159138	0.0384421	0.0285795	0.0156002	0.0294153				0.534557	0.52687	0.561098	0.506536	0.482136	0.639626	0.500329	0.588135	0.487509	0.511766	0.584488	0.539693	0.585779	0.513671	0.774507				0.127926	0.12108	0.126812	0.0958451	0.0858578	0.0982836	0.0608703	0.108799
12	Keratin, type I cytoskeletal 9 OS=Homo sapiens GN=KRT9 PE=1 SV=3	K1C9_HUMAN	62	4.89	Homo sapiens	0.0230635	0.0239209	0.0253558	0.0162982	0.0161864	0.0194685	0.0127715	0.0196039	0.0189198	0.0183223	0.0119675	0.00607916	0.00981681	0.00840787	0.0276796																						0.16704	0.169103	0.175355	0.13327	0.116673	0.148023	0.105422	0.144551
7	Serum albumin OS=Homo sapiens GN=ALB PE=1 SV=2	ALBU_HUMAN	69	6.21	Homo sapiens	0.0273541	0.0194351	0.0286235	0.0202992	0.024971	0.0122392	0.0129671	0.0266855	0.0123503	0.0194759	0.0272017	0.0227248	0.0162281	0.0185506	0.026248																						0.212073	0.209693	0.21751	0.178568	0.139253	0.203312	0.128845	0.182702
181	Serglycin OS=Homo sapiens GN=SRGN PE=1 SV=3	SRGN_HUMAN	18	4.57	Homo sapiens	0	0	0	0	0	0	0	0	0	0	0	0.00210301	0	0.00108044	0.0261355																						0.31281	0.308385	0.325416	0.278239	0.242987	0.342204	0.227955	0.293234
25	Keratin, type II cytoskeletal 2 epidermal OS=Homo sapiens GN=KRT2 PE=1 SV=2	K22E_HUMAN	65	8.17	Homo sapiens	0.0180337	0.0162788	0.0177199	0.0103598	0.0100904	0.0198256	0.00973953	0.0173915	0.0086278	0.0138699	0.00554323	0.00360571	0.00251075	0.00345756	0.0230974																						0.331552	0.331737	0.351535	0.299441	0.264445	0.365315	0.253224	0.311371
8	Ig mu chain C region OS=Homo sapiens GN=IGHM PE=1 SV=3	IGHM_HUMAN	49	6.77	Homo sapiens	0.0450334	0.0405906	0.0421552	0.045298	0.0225802	0.0552891	0.0234233	0.0381505	0.0349585	0.0266199	0.0262649	0.0169327	0.0159783	0.0198028	0.0227851				CHOL					DOPG					DOTAP								0.534557	0.52687	0.561098	0.506536	0.482136	0.639626	0.500329	0.588135
14	Keratin, type I cytoskeletal 10 OS=Homo sapiens GN=KRT10 PE=1 SV=6	K1C10_HUMAN	59	4.88	Homo sapiens	0.0177916	0.0187513	0.021139	0.0121818	0.0100455	0.0243988	0.0105625	0.0157492	0.0141366	0.0156027	0.0103405	0.00664804	0.00570845	0.00749044	0.0223207				CHOL_A	CHOL_B	CHOL_C	CHOL_D	CHOL_E	DOPG_A	DOPG_B	DOPG_C	DOPG_D	DOPG_E	DOTAP_A	DOTAP_B	DOTAP_C	DOTAP_D	DOTAP_E
34	Apolipoprotein A-I OS=Homo sapiens GN=APOA1 PE=1 SV=1	APOA1_HUMAN	31	5.5	Homo sapiens	0.00738786	0.00558788	0.006281	0.00410418	0.00356749	0.00132856	0	0.00483273	0.00270688	0	0.0207663	0.0141481	0.0287233	0.0136172	0.0207152			>9	0.0283635	0.0288192	0.0271136	0.0520666	0.0371333	0.0247908	0.0752676	0.0540747	0.0511704	0.0637595	0	0.0144448	0	0.0163403	0
23	Hyaluronan-binding protein 2 OS=Homo sapiens GN=HABP2 PE=1 SV=1	HABP2_HUMAN	63	6.52	Homo sapiens	0	0	0	0	0	0	0	0	0	0	0.0238902	0.0171951	0.0119139	0.0137231	0.0205004			08_09	0.13884	0.173888	0.214425	0.174547	0.193358	0.21995	0.198899	0.182173	0.180498	0.235011	0.0873161	0.0755809	0.0690047	0.0995091	0.117963
13	Fibrinogen beta chain OS=Homo sapiens GN=FGB PE=1 SV=2	FIBB_HUMAN	56	8.38	Homo sapiens	0.00598646	0.0121104	0.00420342	0.011699	0.00973579	0.0139485	0.0225071	0.00805507	0.00996321	0.00935583	0.0293887	0.018681	0.0242469	0.0167461	0.0187735			07_08	0.192024	0.221592	0.205878	0.173202	0.14461	0.243912	0.248474	0.19559	0.170715	0.153863	0.143964	0.134975	0.166523	0.150752	0.154097
92	C-reactive protein OS=Homo sapiens GN=CRP PE=1 SV=1	CRP_HUMAN	25	5.32	Homo sapiens	0	0	0	0	0	0	0	0	0	0	0.00696092	0.00570146	0	0.0095081	0.0163003			06_07	0.110574	0.0743835	0.0850069	0.0655972	0.0568522	0.0769412	0.0363904	0.073528	0.0473088	0.0460959	0.105134	0.0866299	0.0800566	0.0748076	0.0989667
106	Transthyretin OS=Homo sapiens GN=TTR PE=1 SV=1	TTHY_HUMAN	16	5.58	Homo sapiens	0	0	0	0	0	0	0	0	0	0	0.0102166	0.00548823	0.0169902	0.00702972	0.0162205			05_06	0.148715	0.136147	0.139929	0.153592	0.159525	0.205832	0.186408	0.200781	0.165472	0.171672	0.234161	0.268433	0.282026	0.217933	0.202999				CHOL					DOPG
29	CD5 antigen-like OS=Homo sapiens GN=CD5L PE=1 SV=1	CD5L_HUMAN	38	5.15	Homo sapiens	0.0148317	0.0149838	0.0154056	0.0110184	0.00935998	0.0183441	0.00932095	0.0132655	0.013082	0.0101385	0.0106008	0.00602991	0.00344309	0.007982	0.0160712			<5	0.0958835	0.127541	0.12693	0.0909701	0.0847098	0.117414	0.0786994	0.0923382	0.101482	0.07985	0.0892264	0.0506387	0.1023	0.0457637	0.200481				CHOL_A	CHOL_B	CHOL_C	CHOL_D	CHOL_E	DOPG_A	DOPG_B	DOPG_C
41	Apolipoprotein E OS=Homo sapiens GN=APOE PE=1 SV=1	APOE_HUMAN	36	5.42	Homo sapiens	0.00634019	0	0.00378323	0.00100072	0.00439033	0	0	0	0.00174819	0	0.0139468	0.0119364	0.0211447	0.014484	0.0153994			tot	0.7144	0.76237	0.799283	0.709975	0.676188	0.888841	0.824138	0.798484	0.716646	0.750251	0.659802	0.630702	0.699911	0.605106	0.774507			>300	0	0	0	0	0	0	0	0
45	Keratin, type I cytoskeletal 14 OS=Homo sapiens GN=KRT14 PE=1 SV=4	K1C14_HUMAN	52	4.81	Homo sapiens	0.011121	0.013961	0.0206544	0.0108497	0.00957225	0.0113922	0.00663657	0.00891829	0.0162933	0.00759979	0.00312026	0.00320832	0	0.00443289	0.0152796																					150-300	0	0	0	0	0	0	0	0
3	Complement C3 OS=Homo sapiens GN=C3 PE=1 SV=2	CO3_HUMAN	187	6.34	Homo sapiens	0.00627134	0.0103023	0.00731545	0.00627408	0.00739542	0.00518599	0.00409411	0.00779223	0.0036346	0.00565178	0.0277771	0.0168113	0.0213185	0.0107292	0.0152273																					100-150	0	0	0	0	0	0.00941294	0	0
19	Prothrombin OS=Homo sapiens GN=F2 PE=1 SV=2	THRB_HUMAN	70	5.7	Homo sapiens	0	0	0	0	0	0	0	0	0	0.000575807	0.0216673	0.017732	0.0207878	0.0231112	0.0150898																					80-100	0	0	0	0	0	0	0	0
69	Ficolin-3 OS=Homo sapiens GN=FCN3 PE=1 SV=2	FCN3_HUMAN	33	6.66	unknown	0	0.00191308	0	0.00193517	0.00191556	0	0	0	0.0038001	0.00210737	0.00330087	0.0034908	0.00756518	0.00619523	0.014206																					70-80	0	0	0.0116517	0	0	0	0	0
5	Ig kappa chain C region OS=Homo sapiens GN=IGKC PE=1 SV=1	IGKC_HUMAN	12	5.68	Homo sapiens	0.1228	0.110508	0.110407	0.142573	0.150165	0.174462	0.170815	0.187515	0.15239	0.161533	0.0527546	0.105394	0.0461547	0.0896769	0.0141744																					60-70	0.131699	0.110777	0.16084	0.0895711	0.0974409	0.104161	0.0548301	0.107228
88	Apolipoprotein C-II OS=Homo sapiens GN=APOC2 PE=1 SV=1	APOC2_HUMAN	11	4.36	Homo sapiens	0.00692277	0	0.0106439	0	0.00646854	0	0	0	0	0	0.0119063	0.0064067	0.0148152	0.0113975	0.0132512																					50-60	0.0405618	0.0709846	0.0635778	0.0463331	0.0443846	0.0764504	0.0486625	0.0356033
44	Keratin, type II cytoskeletal 5 OS=Homo sapiens GN=KRT5 PE=1 SV=3	K2C5_HUMAN	62	7.91	Homo sapiens	0.0100441	0.00942356	0.0126239	0.00645498	0.00777535	0.00852017	0.00585224	0.00724808	0.00971447	0.0074937	0.00421622	0.00191608	0.00280374	0.00276432	0.0128595																					40-50	0.0993024	0.0963729	0.0926237	0.0778841	0.0671484	0.115674	0.0859009	0.0880332
42	Serum paraoxonase/arylesterase 1 OS=Homo sapiens GN=PON1 PE=1 SV=3	PON1_HUMAN	40	4.89	Homo sapiens	0	0	0	0.000450325	0.000790013	0	0	0	0	0.00148293	0.0190873	0.0129883	0.0181922	0.0123787	0.0123825																					30-40	0.141144	0.159486	0.143937	0.156602	0.159605	0.212722	0.212214	0.162158
10	Complement C4-A OS=Homo sapiens GN=C4A PE=1 SV=2	CO4A_HUMAN	193	7.08	Homo sapiens	0.00314811	0.00433894	0.0027299	0.00349025	0.00421796	0.00252338	0.00173925	0.0014119	0.00268927	0.00338076	0.0169592	0.0102119	0.0129401	0.0102967	0.0121391																					20-30	0.0365716	0.0521712	0.0532323	0.0477024	0.0482633	0.0560461	0.0544768	0.0519506
18	Fibrinogen gamma chain OS=Homo sapiens GN=FGG PE=1 SV=3	FIBG_HUMAN	52	5.32	Homo sapiens	0.00643202	0.0106547	0.00491843	0.00576478	0.00805694	0.0130258	0.0155929	0.00760079	0.00765064	0.00609687	0.0170151	0.0128723	0.0112913	0.00951797	0.0118185																					<20	0.265121	0.272578	0.273421	0.291883	0.259346	0.314376	0.368054	0.353512
22	Keratin, type II cytoskeletal 6A OS=Homo sapiens GN=KRT6A PE=1 SV=3	K2C6A_HUMAN	60	8.16	Homo sapiens	0.00987966	0.00999427	0.0185603	0.00970846	0.0123792	0.0094906	0.00761734	0.0108989	0.013749	0.01023	0.00399592	0.000981373	0.00146405	0.00340973	0.0107945																					tot	0.7144	0.76237	0.799283	0.709975	0.676188	0.888841	0.824138	0.798484
154	Glyceraldehyde-3-phosphate dehydrogenase OS=Homo sapiens GN=GAPDH PE=1 SV=3	G3P_HUMAN	36	8.73	Homo sapiens	0	0	0	0.00100158	0.000436651	0	0	0.00529687	0.000782307	0	0	0	0	0	0.0105835
71	C4b-binding protein beta chain OS=Homo sapiens GN=C4BPB PE=1 SV=1	C4BPB_HUMAN	28	4.8	Homo sapiens	0	0.00228809	0	0	0	0	0	0	0	0	0.00972323	0.00792466	0.00700086	0.00826045	0.0105304
109	Serum amyloid P-component OS=Homo sapiens GN=APCS PE=1 SV=2	SAMP_HUMAN	25	6.52	Homo sapiens	0	0.00313894	0.00381958	0	0	0.00335934	0	0.00110423	0	0	0.00348541	0.00178891	0.00347663	0.00158423	0.010491
27	Thrombospondin-1 OS=Homo sapiens GN=THBS1 PE=1 SV=2	TSP1_HUMAN	129	4.51	Homo sapiens	0.000476434	0.000857057	0.00121346	0	0.00238795	0.000332593	0	0.00084402	0.000592028	0.00192183	0.00490579	0.00671447	0.00100526	0.00849992	0.0104784
24	Keratin, type I cytoskeletal 16 OS=Homo sapiens GN=KRT16 PE=1 SV=4	K1C16_HUMAN	51	4.69	Homo sapiens	0.0116491	0.0155072	0.0217844	0.0116025	0.0150311	0.013685	0.00803315	0.0109358	0.0211283	0.00871724	0.00277379	0.00213587	0	0.00323478	0.0102853
116	Ficolin-2 OS=Homo sapiens GN=FCN2 PE=1 SV=2	FCN2_HUMAN	34	6.77	unknown	0.000923307	0	0	0.00134123	0.00185958	0.003732	0	0	0.00205387	0.00493309	0	0	0	0	0.00940329
43	Vitamin K-dependent protein S OS=Homo sapiens GN=PROS1 PE=1 SV=1	PROS_HUMAN	75	5.37	Homo sapiens	0	0	0	0	0	0	0	0	0	0	0.00713295	0.00750223	0.00694399	0.00818415	0.00706021
91	Coagulation factor X OS=Homo sapiens GN=F10 PE=1 SV=2	FA10_HUMAN	55	5.74	Homo sapiens	0	0	0	0	0	0	0	0	0	0	0.00655109	0.00254065	0.00196271	0.00227942	0.00690721
39	Ig alpha-1 chain C region OS=Homo sapiens GN=IGHA1 PE=1 SV=2	IGHA1_HUMAN	38	6.49	Homo sapiens	0.00478777	0.00663734	0.00616224	0.00503516	0.00686005	0.0061364	0.00514288	0.00427585	0.0047672	0.00440272	0.00575365	0.0077479	0.00773169	0.00625342	0.00665585
120	Heat shock 70 kDa protein 1-like OS=Homo sapiens GN=HSPA1L PE=1 SV=2	HS71L_HUMAN	70	5.82	unknown	0	0.0011159	0	0	0	0	0	0.00409044	0	0	0	0	0.000465622	0	0.00507193
33	Inter-alpha-trypsin inhibitor heavy chain H2 OS=Homo sapiens GN=ITIH2 PE=1 SV=2	ITIH2_HUMAN	106	6.85	Homo sapiens	0	0	0	0	0.000222445	0	0	0	0	0	0.00915975	0.00485943	0.00952548	0.00859635	0.00500589
49	Clusterin OS=Homo sapiens GN=CLU PE=1 SV=1	CLUS_HUMAN	52	6.21	Homo sapiens	0	0	0	0	0	0	0	0	0	0	0.00672048	0.00456826	0.0142341	0.00596301	0.0045128
11	Ig gamma-2 chain C region OS=Homo sapiens GN=IGHG2 PE=1 SV=2	IGHG2_HUMAN	36	7.66	Homo sapiens	0.054136	0.0682942	0.0460949	0.0487566	0.0482819	0.075159	0.0750375	0.056458	0.0581686	0.0476679	0.0160562	0.0212536	0.0274758	0.0343009	0.00437034
79	Complement component C9 OS=Homo sapiens GN=C9 PE=1 SV=2	CO9_HUMAN	63	5.27	Homo sapiens	0	0	0	0	0	0	0	0	0	0	0.00554707	0.00412892	0.00397375	0.00114879	0.00416311
55	Actin, cytoplasmic 2 OS=Homo sapiens GN=ACTG1 PE=1 SV=1	ACTG_HUMAN	42	5.16	Homo sapiens	0.00796345	0.00225597	0	0.00390022	0.00282273	0	0	0.00582922	0.00233746	0.00282462	0	0.00434291	0.00102367	0.00439782	0.00402344
57	Inter-alpha-trypsin inhibitor heavy chain H3 OS=Homo sapiens GN=ITIH3 PE=1 SV=2	ITIH3_HUMAN	100	5.49	Homo sapiens	0	0	0	0	0	0	0	0	0	0	0.00370478	0.00308023	0.00467404	0.00322969	0.00374932
36	Fibrinogen alpha chain OS=Homo sapiens GN=FGA PE=1 SV=2	FIBA_HUMAN	95	5.87	Homo sapiens	0.00192905	0.00397531	0.000830052	0.000764271	0.00133058	0.00290675	0.00177096	0.00274035	0.00395823	0.00104108	0.00356031	0.0028109	0.00766475	0.00291458	0.00339432
15	Complement factor H OS=Homo sapiens GN=CFH PE=1 SV=4	CFAH_HUMAN	139	6.59	Homo sapiens	0.0025152	0.00442445	0.00447761	0.00386462	0.00255833	0.00941294	0.0048266	0.00402419	0.00231346	0.0035641	0.00730152	0.00481194	0.00663874	0.00537121	0.00336468
1	Apolipoprotein B-100 OS=Homo sapiens GN=APOB PE=1 SV=2	APOB_HUMAN	516	7.04	Homo sapiens	0.00503904	0.00621685	0.005399	0.00715502	0.00633999	0.00430024	0.00507719	0.00446819	0.00524484	0.00515747	0.00281177	0.00520091	0.0127424	0.0119213	0.00318886
31	Serotransferrin OS=Homo sapiens GN=TF PE=1 SV=3	TRFE_HUMAN	77	7.13	Homo sapiens	0.0067151	0.00204504	0.0116517	0.00437495	0.00523392	0.00683738	0.00206221	0.00619628	0.00263115	0.00616829	0.00694767	0.00626597	0	0.00283453	0.00299752
37	Inter-alpha-trypsin inhibitor heavy chain H1 OS=Homo sapiens GN=ITIH1 PE=1 SV=3	ITIH1_HUMAN	101	6.78	Homo sapiens	0	0	0	0	0.000156561	0	0	0	0	0	0.00626787	0.00308253	0.00817295	0.00862	0.00291931
20	Alpha-2-macroglobulin OS=Homo sapiens GN=A2M PE=1 SV=3	A2MG_HUMAN	163	6.43	Homo sapiens	0.00457651	0.0071727	0.000468399	0.00318339	0.00625332	0	0.000116255	0	0.000469632	0.00321945	0.00395422	0.00422494	0.00379497	0.00226767	0.0026425
103	Protein Z-dependent protease inhibitor OS=Homo sapiens GN=SERPINA10 PE=1 SV=1	ZPI_HUMAN	51	8.58	Homo sapiens	0	0	0	0	0	0	0	0	0	0	0.00492904	0.00300187	0.00233423	0.000259755	0.00236018
60	Histidine-rich glycoprotein OS=Homo sapiens GN=HRG PE=1 SV=1	HRG_HUMAN	60	7.52	Homo sapiens	0.0017703	0.00130789	0	0	0.00223946	0.000713303	0.000301566	0	0.000568784	0.00261795	0.00290689	0.00281108	0.00580211	0.00528076	0.00233777
65	Coagulation factor IX OS=Homo sapiens GN=F9 PE=1 SV=2	FA9_HUMAN	52	5.16	Homo sapiens	0	0	0	0	0	0	0	0	0	0	0.00840567	0.00579402	0.00543669	0.00470138	0.00231479
32	Plasminogen OS=Homo sapiens GN=PLG PE=1 SV=2	PLMN_HUMAN	91	7.25	Homo sapiens	0.000330413	0.00433801	0	0.00370407	0.00381939	0.00047031	0.00287015	0.000892412	0.00237914	0.0013255	0.006114	0.0049374	0.00381538	0.00580203	0.00224513
153	14-3-3 protein zeta/delta OS=Homo sapiens GN=YWHAZ PE=1 SV=1	1433Z_HUMAN	28	4.43	Homo sapiens	0	0	0	0	0	0	0	0	0	0	0	0.00283406	0	0.00307577	0.00205129
170	Amyloid beta A4 protein OS=Homo sapiens GN=APP PE=1 SV=3	A4_HUMAN	87	4.45	Homo sapiens	0	0	0	0	0	0	0	0	0	0	0	0.000652658	0	0.000683692	0.00201827
63	Cartilage oligomeric matrix protein OS=Homo sapiens GN=COMP PE=1 SV=2	COMP_HUMAN	83	4.16	Homo sapiens	0	0	0	0	0	0	0	0	0	0	0.00578962	0.00364859	0.00156518	0.00485843	0.00173001
66	Apolipoprotein A-IV OS=Homo sapiens GN=APOA4 PE=1 SV=3	APOA4_HUMAN	45	5.05	Homo sapiens	0	0	0	0	0	0	0	0	0	0	0.0140537	0.00543251	0.00724298	0.00263249	0.00127636
163	Elongation factor 1-alpha 2 OS=Homo sapiens GN=EEF1A2 PE=1 SV=1	EF1A2_HUMAN	50	9.5	unknown	0	0	0	0	0	0	0	0.00380366	0	0	0	0	0.00043458	0	0.00125866
59	Alpha-1-antitrypsin OS=Homo sapiens GN=SERPINA1 PE=1 SV=3	A1AT_HUMAN	47	5.31	Homo sapiens	0	0	0	0.000974825	0.0025227	0	0	0.00203429	0	0	0.00465189	0.0042836	0.0161811	0.00407244	0.00122205
70	Platelet glycoprotein 4 OS=Homo sapiens GN=CD36 PE=1 SV=2	CD36_HUMAN	53	8.06	Homo sapiens	0.00144328	0	0.00220911	0.00291993	0.00462364	0	0	0	0.00290628	0.00373782	0	0.00165682	0	0.00161687	0.00118741
54	Coagulation factor V OS=Homo sapiens GN=F5 PE=1 SV=4	FA5_HUMAN	252	5.95	Homo sapiens	0.000843455	0.000125473	0	0.000505855	0.000627141	0.00100705	0.00033452	0.000269613	0.000497633	0.000627368	0.000215275	0.000438032	0.000733841	0.000444923	0.000447049
56	Ig gamma-3 chain C region OS=Homo sapiens GN=IGHG3 PE=1 SV=2	IGHG3_HUMAN	41	7.95	Homo sapiens	0.0437759	0.0557823	0.0504684	0.0325861	0.0352671	0.0603846	0.0624776	0.0498826	0.0312387	0.0370611	0.0194213	0.0203659	0.0262111	0.0219017	0
21	Immunoglobulin lambda-like polypeptide 5 OS=Homo sapiens GN=IGLL5 PE=2 SV=2	IGLL5_HUMAN	23	9.05	Homo sapiens	0.017829	0.0288192	0.0271136	0.0265012	0.0268052	0.0247908	0.0292077	0.0338139	0.0227947	0.0296142	0.00995434	0.0144448	0.0118092	0.0163403	0
119	Ig gamma-4 chain C region OS=Homo sapiens GN=IGHG4 PE=1 SV=1	IGHG4_HUMAN	36	7.41	Homo sapiens	0	0	0	0.0152142	0	0	0.0346692	0	0.0151131	0	0	0.0134917	0.0108838	0.0161403	0
62	Protein AMBP OS=Homo sapiens GN=AMBP PE=1 SV=1	AMBP_HUMAN	39	6.15	Homo sapiens	0	0	0	0	0	0	0.000484672	0	0	0	0.0106271	0.0061771	0.00416676	0.0120019	0
158	Complement C4-B OS=Homo sapiens GN=C4B PE=1 SV=2	CO4B_HUMAN	193	7.28	Homo sapiens	0	0	0	0	0	0	0	0	0	0	0	0.0103371	0	0.010637	0
77	Ig heavy chain V-III region 23 OS=Homo sapiens GN=IGHV3-23 PE=1 SV=2	HV303_HUMAN	13	8.46	Homo sapiens	0.0103728	0.0181216	0.0134131	0.0195702	0.0115425	0.014707	0.0194042	0.00931578	0.0161234	0.0159375	0.0108978	0.00322132	0	0.0101536	0
30	Haptoglobin OS=Homo sapiens GN=HP PE=1 SV=1	HPT_HUMAN	45	6.56	Homo sapiens	0.0104931	0.00737989	0.00825751	0.0066564	0.00930106	0	0.00144428	0.00664652	0.00403203	0.00591569	0.010422	0.012966	0.0122976	0.00924142	0
82	Apolipoprotein M OS=Homo sapiens GN=APOM PE=1 SV=2	APOM_HUMAN	21	5.92	Homo sapiens	0.00142089	0	0	0	0.00112947	0	0	0	0	0	0.00831906	0.00696105	0.010325	0.00755066	0
50	Ig kappa chain V-III region HAH OS=Homo sapiens PE=2 SV=1	KV312_HUMAN	14	4.59	Homo sapiens	0.00322153	0.00792674	0.00273055	0.0188365	0.0124165	0.0135951	0.0199823	0.010701	0.0179814	0.0148293	0	0.00503063	0.00460654	0.00713841	0
74	Ig heavy chain V-III region GAL OS=Homo sapiens PE=1 SV=1	HV320_HUMAN	13	8.7	Homo sapiens	0.00938683	0.00853649	0.00900635	0.0125983	0.00608156	0	0.0129416	0.00837771	0.0113319	0.0121383	0	0.00635207	0	0.00661915	0
123	Apolipoprotein A-II OS=Homo sapiens GN=APOA2 PE=1 SV=1	APOA2_HUMAN	11	6.6	Homo sapiens	0.00285386	0	0	0	0.00359464	0	0	0	0	0	0.00490929	0.00889216	0.00592608	0.0066117	0
53	Immunoglobulin J chain OS=Homo sapiens GN=IGJ PE=1 SV=4	IGJ_HUMAN	18	4.87	Homo sapiens	0.0135156	0.0105509	0.0118777	0.00908513	0.00658706	0.0117628	0.00571358	0.00829326	0.00815823	0.00933466	0.0078981	0.00534581	0	0.00658907	0
78	Tropomyosin alpha-4 chain OS=Homo sapiens GN=TPM4 PE=1 SV=3	TPM4_HUMAN	29	4.36	Homo sapiens	0	0	0	0	0	0	0	0	0	0	0.00188772	0.0137204	0.00746876	0.00569377	0
67	Platelet factor 4 OS=Homo sapiens GN=PF4 PE=1 SV=2	PLF4_HUMAN	11	8.78	Homo sapiens	0.00681274	0	0.00520562	0.0123851	0.00718729	0	0	0.011107	0.0158839	0.0188353	0	0.0104683	0	0.00539417	0
51	Complement C1q subcomponent subunit C OS=Homo sapiens GN=C1QC PE=1 SV=3	C1QC_HUMAN	26	8.58	Homo sapiens	0.00526724	0.00973464	0.0104756	0.00805189	0.00637764	0.0081435	0.0054123	0.00523122	0.00536481	0.00494467	0.00714435	0.003904	0.0083662	0.00533153	0
189	Serum amyloid A-4 protein OS=Homo sapiens GN=SAA4 PE=1 SV=2	SAA4_HUMAN	15	9.38	Homo sapiens	0	0	0	0	0	0	0	0	0	0	0	0.00160779	0.00286629	0.00529501	0
128	Secreted phosphoprotein 24 OS=Homo sapiens GN=SPP2 PE=1 SV=1	SPP24_HUMAN	24	8.46	Homo sapiens	0	0	0	0	0	0	0	0	0	0	0.00726724	0.00609278	0	0.00467472	0
117	Hemoglobin subunit beta OS=Homo sapiens GN=HBB PE=1 SV=2	HBB_HUMAN	16	7.32	Homo sapiens	0	0	0	0.00568195	0.00494126	0	0	0	0	0.00251916	0	0.00397532	0.00138703	0.00455009	0
76	Ig kappa chain V-I region EU OS=Homo sapiens PE=1 SV=1	KV106_HUMAN	12	8.46	unknown	0.00760823	0.0157918	0.00975688	0.00912445	0.0138327	0.00700748	0.0124469	0.00331672	0.0062477	0.0140123	0	0.00171716	0	0.00439873	0
64	Complement C1s subcomponent OS=Homo sapiens GN=C1S PE=1 SV=1	C1S_HUMAN	77	4.59	Homo sapiens	0	0	0	0	0	0	0	0	0	0	0.00623434	0.00386982	0.00338934	0.00403252	0
73	Kininogen-1 OS=Homo sapiens GN=KNG1 PE=1 SV=2	KNG1_HUMAN	72	6.8	Homo sapiens	0	0	0	0	0	0	0	0	0	0	0.00408738	0.00303642	0.00513688	0.00357355	0
46	Ceruloplasmin OS=Homo sapiens GN=CP PE=1 SV=1	CERU_HUMAN	122	5.5	Homo sapiens	0	0	0	0	0.000128848	0	0	0	0	0	0.00438618	0.00373948	0.00685708	0.00335089	0
101	Ig alpha-2 chain C region OS=Homo sapiens GN=IGHA2 PE=1 SV=3	IGHA2_HUMAN	37	6.02	Homo sapiens	0	0	0.00206349	0.00615283	0	0	0	0	0.00562717	0	0	0.00212215	0	0.00301896	0
132	Complement component C8 gamma chain OS=Homo sapiens GN=C8G PE=1 SV=3	CO8G_HUMAN	22	8.48	Homo sapiens	0	0	0	0	0	0.0019502	0	0	0	0	0.00496906	0.00312908	0.0044551	0.00299836	0
81	Complement C1q subcomponent subunit B OS=Homo sapiens GN=C1QB PE=1 SV=3	C1QB_HUMAN	27	8.87	Homo sapiens	0.00449081	0.00640038	0.00212081	0.0057135	0.00380491	0	0.000701836	0.0014741	0.00233092	0.00329539	0.00363805	0.00369889	0.00362149	0.00293375	0
130	Apolipoprotein C-I OS=Homo sapiens GN=APOC1 PE=1 SV=1	APOC1_HUMAN	9	9.17	Homo sapiens	0.00331541	0	0	0	0.00527848	0	0	0	0	0	0	0.00630903	0	0.00291253	0
68	Myosin-9 OS=Homo sapiens GN=MYH9 PE=1 SV=4	MYH9_HUMAN	227	5.29	Homo sapiens	0	0	0	0	6.92486e-05	0	0	0	0	0	0	0.00105533	0	0.00291083	0
35	Integrin beta-3 OS=Homo sapiens GN=ITGB3 PE=1 SV=2	ITB3_HUMAN	87	4.85	Homo sapiens	0.00245965	0.0023599	0.00225246	0.00386872	0.00763223	0.00170506	0.00075196	0.00218565	0.00442702	0.00569781	0	0.0037629	0	0.00287632	0
118	Ig heavy chain V-III region CAM OS=Homo sapiens PE=1 SV=1	HV307_HUMAN	14	6.5	unknown	0	0	0	0	0	0	0.00338385	0	0.0041409	0	0	0	0	0.00285433	0
113	Ig lambda chain V-III region LOI OS=Homo sapiens PE=1 SV=1	LV302_HUMAN	12	4.72	Homo sapiens	0	0.0105653	0	0.00375658	0.00394151	0	0.0101139	0.00230049	0.00167959	0.00991108	0	0.00200974	0	0.00273674	0
58	Ig heavy chain V-III region TRO OS=Homo sapiens PE=1 SV=1	HV301_HUMAN	13	10	Homo sapiens	0.00706513	0	0	0.0119185	0.010328	0	0.0150952	0.00510265	0.0161234	0.023467	0	0.00368815	0	0.00252589	0
137	Alpha-1-acid glycoprotein 1 OS=Homo sapiens GN=ORM1 PE=1 SV=1	A1AG1_HUMAN	24	4.66	Homo sapiens	0.00256084	0	0	0	0.000661711	0	0	0	0	0	0.000891795	0.000572385	0.00227309	0.00247536	0
83	Heparin cofactor 2 OS=Homo sapiens GN=SERPIND1 PE=1 SV=3	HEP2_HUMAN	57	6.89	Homo sapiens	0	0	0	0	0	0	0	0	0	0	0.00518538	0.00328447	0.00306188	0.0024332	0
95	Dermcidin OS=Homo sapiens GN=DCD PE=1 SV=2	DCD_HUMAN	11	6.52	Homo sapiens	0.0165998	0.0143578	0.0142282	0.00826606	0.00431028	0	0.00257757	0.005025	0.00567896	0.00715905	0.00194573	0	0	0.0023962	0
237	Serum amyloid A-2 protein OS=Homo sapiens GN=SAA2 PE=1 SV=1	SAA2_HUMAN	14	9.48	Homo sapiens	0	0	0	0	0	0	0	0	0	0	0	0	0	0.0023812	0
214	Myosin light polypeptide 6 OS=Homo sapiens GN=MYL6 PE=1 SV=2	MYL6_HUMAN	17	4.29	Homo sapiens	0	0	0	0	0	0	0	0	0	0	0	0.00142391	0	0.00235062	0
97	Vitamin K-dependent protein C OS=Homo sapiens GN=PROC PE=1 SV=1	PROC_HUMAN	52	6.23	Homo sapiens	0	0	0	0	0	0	0	0	0	0	0.00378548	0.00254788	0.00230717	0.00228766	0
159	Tubulin beta-1 chain OS=Homo sapiens GN=TUBB1 PE=1 SV=1	TBB1_HUMAN	50	4.82	Homo sapiens	0	0	0	0	0	0	0	0	0.000413807	0	0	0.00158708	0	0.00224096	0
61	Ig heavy chain V-III region TUR OS=Homo sapiens PE=1 SV=1	HV318_HUMAN	12	10.12	Homo sapiens	0	0	0	0.0136469	0.00658344	0	0.0154348	0.0103627	0.0122522	0	0	0.00674151	0	0.00220791	0
17	Filamin-A OS=Homo sapiens GN=FLNA PE=1 SV=4	FLNA_HUMAN	281	5.95	Homo sapiens	0.00238013	0.002025	0.00201103	0.00249359	0.00371189	0.0018822	0.000532894	0.00184516	0.00241583	0.00249459	0	0.00189447	0	0.00220671	0
102	Thrombospondin-4 OS=Homo sapiens GN=THBS4 PE=1 SV=2	TSP4_HUMAN	106	4.23	Homo sapiens	0	0	0	0	0	0	0	0	0	0	0.00237017	0.00155721	0.000200616	0.0021175	0
94	Ig kappa chain V-IV region (Fragment) OS=Homo sapiens GN=IGKV4-1 PE=4 SV=1	KV401_HUMAN	13	4.85	Homo sapiens	0.00938683	0.0109328	0	0.00558625	0.00547433	0.00646844	0.00930296	0.00731352	0.00545715	0.00760791	0	0.00529536	0	0.00202755	0
105	Ig kappa chain V-III region VG (Fragment) OS=Homo sapiens PE=1 SV=1	KV309_HUMAN	13	4.59	Homo sapiens	0	0	0	0.00208199	0	0	0	0	0.00645486	0.00229089	0	0.00238006	0	0.00202755	0
165	Lumican OS=Homo sapiens GN=LUM PE=1 SV=2	LUM_HUMAN	38	6.6	Homo sapiens	0	0	0	0	0	0	0	0	0	0	0.00172329	0.00131467	0.00285297	0.00190829	0
47	Complement C5 OS=Homo sapiens GN=C5 PE=1 SV=4	CO5_HUMAN	188	6.49	Homo sapiens	0	0.000172592	0	0.000191792	0.000420285	0	0.000247438	0	7.14719e-05	0	0.00261298	0.00201577	0.00306779	0.00189452	0
111	Ig kappa chain V-III region CLL OS=Homo sapiens PE=4 SV=2	KV308_HUMAN	14	8.7	unknown	0.00214769	0.00450939	0	0.00520591	0.0067642	0	0.00396895	0.00197185	0.00502129	0.00915281	0	0	0	0.00188273	0
28	Apolipoprotein(a) OS=Homo sapiens GN=LPA PE=1 SV=1	APOA_HUMAN	501	5.77	Homo sapiens	0.000122675	0.00261628	0.000467342	0.00123414	0.000535962	0	0.000856375	0.000408164	0.000919916	0.000551164	0	0.000151114	0.00110643	0.00180558	0
186	Apolipoprotein C-IV OS=Homo sapiens GN=APOC4 PE=1 SV=1	APOC4_HUMAN	15	9.13	Homo sapiens	0	0	0.00254851	0	0	0	0	0	0	0	0	0	0	0.00175721	0
107	Complement component C8 alpha chain OS=Homo sapiens GN=C8A PE=1 SV=2	CO8A_HUMAN	65	6.41	Homo sapiens	0	0	0	0	0.000485109	0	0	0	0	0	0.00285393	0.00236112	0.000334293	0.00173039	0
96	Complement C1r subcomponent OS=Homo sapiens GN=C1R PE=1 SV=2	C1R_HUMAN	80	6.14	Homo sapiens	0	0	0	0	0.000989263	0	0	0	0	0.000493283	0.00191263	0.00148496	0.00162967	0.00173008	0
108	Vitamin D-binding protein OS=Homo sapiens GN=GC PE=1 SV=1	VTDB_HUMAN	53	5.21	Homo sapiens	0	0	0	0	0.00208817	0	0	0	0	0	0.00102432	0.00228025	0	0.00161953	0
114	Phosphatidylcholine-sterol acyltransferase OS=Homo sapiens GN=LCAT PE=1 SV=1	LCAT_HUMAN	50	6.04	Homo sapiens	0	0	0	0	0	0	0	0	0	0	0.00458394	0.00234416	0.00305596	0.00158141	0
164	Tubulin alpha-4A chain OS=Homo sapiens GN=TUBA4A PE=1 SV=1	TBA4A_HUMAN	50	4.69	Homo sapiens	0	0	0	0	0	0	0	0	0	0	0	0.0014497	0	0.00157995	0
126	Complement component C8 beta chain OS=Homo sapiens GN=C8B PE=1 SV=3	CO8B_HUMAN	67	8.17	Homo sapiens	0	0	0	0	0	0	0	0	0	0	0.000977386	0.0020312	0.00145941	0.00157777	0
48	Fibronectin OS=Homo sapiens GN=FN1 PE=1 SV=4	FINC_HUMAN	263	5.45	Homo sapiens	0.000119363	0.000360269	0	0.000898917	0.000781236	0	0	0	0.000562583	0.000228749	0.000954187	0.00076534	0.000910577	0.00138025	0
211	Collectin-11 OS=Homo sapiens GN=COLEC11 PE=1 SV=1	COL11_HUMAN	29	5.06	Homo sapiens	0	0	0	0	0	0	0	0	0	0	0	0.00130532	0	0.00136571	0
146	Hemopexin OS=Homo sapiens GN=HPX PE=1 SV=2	HEMO_HUMAN	52	7.02	Homo sapiens	0	0	0	0	0	0	0	0	0	0	0.00209954	0.00228456	0	0.00126985	0
40	Beta-2-glycoprotein 1 OS=Homo sapiens GN=APOH PE=1 SV=3	APOH_HUMAN	38	8.03	Homo sapiens	0.00679474	0.0062213	0.00713456	0.00598444	0.0174631	0.00778336	0.0127185	0.00571635	0.00421044	0.0192588	0	0.00167618	0	0.00121848	0
197	Tubulin beta chain OS=Homo sapiens GN=TUBB PE=1 SV=2	TBB5_HUMAN	50	4.52	Homo sapiens	0	0	0	0	0	0	0	0	0	0	0	0.00103093	0	0.00118535	0
223	Tubulin alpha-1B chain OS=Homo sapiens GN=TUBA1B PE=1 SV=1	TBA1B_HUMAN	50	4.7	Homo sapiens	0	0	0	0	0	0	0	0	0	0	0	0.00161886	0	0.00118398	0
179	Calreticulin OS=Homo sapiens GN=CALR PE=1 SV=1	CALR_HUMAN	48	4.04	Homo sapiens	0	0	0	0	0	0	0	0	0	0	0	0.00157726	0	0.00109968	0
84	Haptoglobin-related protein OS=Homo sapiens GN=HPR PE=2 SV=2	HPTR_HUMAN	39	7.11	Homo sapiens	0.00819348	0.0052524	0	0.0065238	0.0064823	0.00325354	0.00335429	0	0.00484115	0.0060838	0.00284413	0.00523389	0	0.00101904	0
90	HLA class I histocompatibility antigen, B-7 alpha chain OS=Homo sapiens GN=HLA-B PE=1 SV=3	1B07_HUMAN	40	5.65	unknown	0.00265831	0.00200725	0.00292706	0.00113888	0.00612515	0.00102963	0	0	0.00155279	0.005691	0	0	0	0.000999014	0
115	Ig heavy chain V-I region V35 OS=Homo sapiens PE=1 SV=1	HV103_HUMAN	13	9.87	Homo sapiens	0	0	0	0.00911181	0	0	0	0.0021284	0.00545715	0.00375324	0	0	0	0.000997331	0
93	Alpha-1-antichymotrypsin OS=Homo sapiens GN=SERPINA3 PE=1 SV=2	AACT_HUMAN	48	5.19	Homo sapiens	0	0	0	0	0	0	0	0	0	0	0.00547633	0.00193846	0.00907787	0.000951266	0
169	Mannan-binding lectin serine protease 2 OS=Homo sapiens GN=MASP2 PE=1 SV=4	MASP2_HUMAN	76	5.37	Homo sapiens	0	0	0	0	0	0	0	0	0	0	0	0.000137754	0.00200135	0.000869802	0
184	Alpha-2-antiplasmin OS=Homo sapiens GN=SERPINF2 PE=1 SV=3	A2AP_HUMAN	55	6.24	Homo sapiens	0	0	0	0	0	0	0	0	0	0	0.00119063	0.000937211	0	0.000832761	0
176	Alpha-actinin-1 OS=Homo sapiens GN=ACTN1 PE=1 SV=2	ACTN1_HUMAN	103	5.07	Homo sapiens	0	0	0	0	0	0	0	0	0	0	0	0.000668347	0	0.000768379	0
150	Mannan-binding lectin serine protease 1 OS=Homo sapiens GN=MASP1 PE=1 SV=3	MASP1_HUMAN	79	5.18	Homo sapiens	0	0	0	0	0	0	0	0	0	0	0.00179957	0.000958333	0.000544232	0.000745674	0
110	Platelet glycoprotein IX OS=Homo sapiens GN=GP9 PE=1 SV=3	GPIX_HUMAN	19	6.32	Homo sapiens	0.0072078	0.00662645	0.00616224	0.00620769	0.00707261	0	0	0	0.00441649	0	0	0	0	0.000704889	0
142	Prenylcysteine oxidase 1 OS=Homo sapiens GN=PCYOX1 PE=1 SV=3	PCYOX_HUMAN	57	6.1	unknown	0	0	0	0.000949138	0.000830174	0	0.0011323	0	0.000736081	0.000681841	0	0	0	0.000694837	0
229	Platelet glycoprotein Ib alpha chain OS=Homo sapiens GN=GP1BA PE=1 SV=2	GP1BA_HUMAN	72	6.24	Homo sapiens	0	0	0	0	0	0	0	0	0	0	0	0.000525752	0	0.000640116	0
213	Fibulin-1 OS=Homo sapiens GN=FBLN1 PE=1 SV=4	FBLN1_HUMAN	77	4.86	Homo sapiens	0	0	0	0	0	0	0	0	0	0	0	0	0.000288214	0.000596661	0
236	Ras-related protein Rab-10 OS=Homo sapiens GN=RAB10 PE=1 SV=1	RAB10_HUMAN	23	8.61	Homo sapiens	0	0	0	0	0	0	0	0	0	0	0	0	0	0.000575978	0
208	Apolipoprotein F OS=Homo sapiens GN=APOF PE=1 SV=2	APOF_HUMAN	35	5.36	Homo sapiens	0	0	0	0	0	0	0	0	0	0	0	0.000448684	0.000620829	0.000573981	0
72	Properdin OS=Homo sapiens GN=CFP PE=1 SV=2	PROP_HUMAN	51	7.92	Homo sapiens	0.000585073	0.00247679	0	0.00392377	0.00201528	0	0.00237134	0.0013217	0.00260541	0.00114309	0	0.00216352	0	0.00052236	0
212	Extracellular superoxide dismutase [Cu-Zn] OS=Homo sapiens GN=SOD3 PE=1 SV=2	SODE_HUMAN	26	6.59	Homo sapiens	0	0	0	0	0	0	0	0	0	0	0	0.00139653	0	0.000515111	0
99	Complement C1q subcomponent subunit A OS=Homo sapiens GN=C1QA PE=1 SV=2	C1QA_HUMAN	26	9.45	Homo sapiens	0.00351149	0.00607445	0.00597245	0.00140692	0.00243128	0.00165017	0	0.00208229	0.00213737	0.00109676	0	0	0	0.000498666	0
85	Integrin alpha-IIb OS=Homo sapiens GN=ITGA2B PE=1 SV=3	ITA2B_HUMAN	113	5.03	Homo sapiens	0	0	0	0.00120563	0.00216891	0	0	0	0.00086721	0.000428055	0	0.000776697	0	0.000466479	0
136	Galectin-3-binding protein OS=Homo sapiens GN=LGALS3BP PE=1 SV=1	LG3BP_HUMAN	65	4.9	unknown	0	0.00122085	0	0.00182236	0	0	0	0	0.000748846	0	0.00117811	0.000241599	0.000490738	0.000403274	0
183	Gelsolin OS=Homo sapiens GN=GSN PE=1 SV=1	GELS_HUMAN	86	6.19	Homo sapiens	0	0	0	0	0	0	0	0	0	0	0.000257956	0	0.00138695	0.000387637	0
38	Hornerin OS=Homo sapiens GN=HRNR PE=1 SV=2	HORN_HUMAN	282	10.24	Homo sapiens	0.00140123	0.00162098	0.00152093	0.0010029	0.00162524	0.000146047	0.00079364	0.0011584	0.00141178	0.00122686	0	0.000122646	7.70533e-05	0.000351872	0
191	Isocitrate dehydrogenase [NADP], mitochondrial OS=Homo sapiens GN=IDH2 PE=1 SV=2	IDHP_HUMAN	51	8.95	Homo sapiens	0	0	0.00074852	0	0	0	0	0	0	0	0	0	0	0.000262606	0
209	Inter-alpha-trypsin inhibitor heavy chain H4 OS=Homo sapiens GN=ITIH4 PE=1 SV=4	ITIH4_HUMAN	103	6.97	Homo sapiens	0	0	0	0	0	0	0	0	0	0	0	0	0.00042192	0.000258644	0
217	Angiotensinogen OS=Homo sapiens GN=AGT PE=1 SV=1	ANGT_HUMAN	53	6.27	Homo sapiens	0	0	0	0	0	0	0	0	0	0	0.00143748	0	0.000418726	0.000252696	0
202	Heat shock protein HSP 90-alpha OS=Homo sapiens GN=HSP90AA1 PE=1 SV=5	HS90A_HUMAN	85	4.66	Homo sapiens	0	0	0	0	0	0	0	0	0	0	0	0.00052615	0	0.000152533	0
143	Phosphatidylinositol-glycan-specific phospholipase D OS=Homo sapiens GN=GPLD1 PE=1 SV=3	PHLD_HUMAN	92	6.33	unknown	0	0	0	0	0	0	0	0	0	0	0.000711792	0.000822917	0.00212314	0.000145575	0
162	Talin-1 OS=Homo sapiens GN=TLN1 PE=1 SV=3	TLN1_HUMAN	270	5.94	Homo sapiens	0	0	0	0	5.85653e-05	0	0	0	0	0	0	0	0	0.000121633	0
256	Aggrecan core protein OS=Homo sapiens GN=ACAN PE=1 SV=2	PGCA_HUMAN	250	3.82	Homo sapiens	0	0	0	0	0	0	0	0	0	0	0	0	0	5.35716e-05	0
155	Beta-Ala-His dipeptidase OS=Homo sapiens GN=CNDP1 PE=1 SV=4	CNDP1_HUMAN	57	4.95	unknown	0	0	0	0	0	0	0	0	0	0	0	0.000480436	0.00458265	0	0
138	Vitamin K-dependent protein Z OS=Homo sapiens GN=PROZ PE=1 SV=2	PROZ_HUMAN	45	5.87	Homo sapiens	0	0	0	0	0	0	0	0	0	0	0.00315056	0.0029462	0.00194176	0	0
192	Alpha-1-acid glycoprotein 2 OS=Homo sapiens GN=ORM2 PE=1 SV=2	A1AG2_HUMAN	24	4.76	Homo sapiens	0	0	0	0	0	0	0	0	0	0	0.00181614	0	0.00179143	0	0
230	Retinol-binding protein 4 OS=Homo sapiens GN=RBP4 PE=1 SV=3	RET4_HUMAN	23	5.85	Homo sapiens	0	0	0	0	0	0	0	0	0	0	0	0	0.00141711	0	0
240	Collectin-10 OS=Homo sapiens GN=COLEC10 PE=2 SV=2	COL10_HUMAN	31	7.39	Homo sapiens	0	0	0	0	0	0	0	0	0	0	0	0.000337719	0.000685978	0	0
149	Alpha-2-HS-glycoprotein OS=Homo sapiens GN=AHSG PE=1 SV=1	FETUA_HUMAN	39	5.52	Homo sapiens	0	0	0	0	0	0	0	0	0	0	0.00251865	0.00225043	0.000545264	0	0
259	Complement component C6 OS=Homo sapiens GN=C6 PE=1 SV=3	CO6_HUMAN	105	6.74	Homo sapiens	0	0	0	0	0	0	0	0	0	0	0	0	0.000211357	0	0
249	Tropomyosin beta chain OS=Homo sapiens GN=TPM2 PE=1 SV=1	TPM2_HUMAN	33	4.36	unknown	0	0	0	0	0	0	0	0	0	0	0	0.00190351	0	0	0
124	Ig lambda chain V-I region WAH OS=Homo sapiens PE=1 SV=1	LV106_HUMAN	12	6.46	unknown	0	0.00526096	0	0.00304832	0.00131772	0	0.00315431	0.00221115	0.00520571	0.00158421	0	0.0011373	0	0	0
257	Tropomyosin alpha-1 chain OS=Homo sapiens GN=TPM1 PE=1 SV=2	TPM1_HUMAN	33	4.39	Homo sapiens	0	0	0	0	0	0	0	0	0	0	0	0.000827129	0	0	0
248	SPARC OS=Homo sapiens GN=SPARC PE=1 SV=1	SPRC_HUMAN	35	4.47	Homo sapiens	0	0	0	0	0	0	0	0	0	0	0	0.000691615	0	0	0
255	Ras-related protein Rap-1A OS=Homo sapiens GN=RAP1A PE=1 SV=1	RAP1A_HUMAN	21	6.55	unknown	0	0	0	0	0	0	0	0	0	0	0	0.000654155	0	0	0
205	Selenoprotein P OS=Homo sapiens GN=SEPP1 PE=1 SV=3	SEPP1_HUMAN	43	7.92	Homo sapiens	0	0	0	0	0	0	0	0	0	0	0.0015229	0.000636858	0	0	0
75	Erythrocyte band 7 integral membrane protein OS=Homo sapiens GN=STOM PE=1 SV=3	STOM_HUMAN	32	8.07	Homo sapiens	0.00334359	0.00296096	0.00298487	0.00626839	0.00592557	0.00594787	0.000590694	0.00165836	0.00742682	0.00461162	0	0.000426489	0	0	0
231	Fermitin family homolog 3 OS=Homo sapiens GN=FERMT3 PE=1 SV=1	URP2_HUMAN	76	6.98	Homo sapiens	0	0	0	0	0	0	0	0	0	0	0	0.000386205	0	0	0
226	Alpha-1B-glycoprotein OS=Homo sapiens GN=A1BG PE=1 SV=4	A1BG_HUMAN	54	5.71	Homo sapiens	0	0	0	0	0	0	0	0	0	0	0	0.000290814	0	0	0
86	Integrin beta-1 OS=Homo sapiens GN=ITGB1 PE=1 SV=2	ITB1_HUMAN	88	5.04	Homo sapiens	0.000874175	0	0.00154769	0.000620373	0.00251463	0.000468014	0	0.000452281	0.000793542	0.002243	0	0.000118969	0	0	0
104	Complement factor H-related protein 1 OS=Homo sapiens GN=CFHR1 PE=1 SV=2	FHR1_HUMAN	38	7.42	Homo sapiens	0.00319084	0.00457084	0	0	0.00165958	0.00500733	0.00243396	0	0	0.00416368	0.00402009	0	0	0	0
145	Ig heavy chain V-III region BUT OS=Homo sapiens PE=1 SV=1	HV306_HUMAN	12	9.48	Homo sapiens	0	0	0	0	0.00789831	0	0.0155299	0	0	0.0106783	0	0	0	0	0
80	Keratin, type I cytoskeletal 17 OS=Homo sapiens GN=KRT17 PE=1 SV=2	K1C17_HUMAN	48	4.67	Homo sapiens	0.00855688	0.00952214	0.0113736	0.00682378	0.00658427	0.00793049	0.00269764	0.00540127	0.00961134	0.0078257	0	0	0	0	0
204	Protein S100-A9 OS=Homo sapiens GN=S100A9 PE=1 SV=1	S10A9_HUMAN	13	6.07	unknown	0.00229529	0	0	0	0	0	0	0	0	0.00757545	0	0	0	0	0
243	Barrier-to-autointegration factor OS=Homo sapiens GN=BANF1 PE=1 SV=1	BAF_HUMAN	10	5.88	unknown	0	0	0	0	0	0	0	0	0	0.00489679	0	0	0	0	0
131	Ig kappa chain V-III region B6 OS=Homo sapiens PE=1 SV=1	KV301_HUMAN	12	9.53	Homo sapiens	0	0	0	0	0.00196493	0	0.00150783	0	0.00223945	0.00408066	0	0	0	0	0
89	Ig kappa chain V-II region RPMI 6410 OS=Homo sapiens PE=4 SV=1	KV206_HUMAN	15	9.53	Homo sapiens	0	0.00409123	0.00636596	0.00667861	0.00158811	0	0.00430275	0	0.00744066	0.00403065	0	0	0	0	0
127	Small proline-rich protein 2A OS=Homo sapiens GN=SPRR2A PE=1 SV=1	SPR2A_HUMAN	8	8.49	unknown	0.00784811	0	0.0243389	0.0045686	0.00395316	0	0.00473147	0	0.00352038	0.00383477	0	0	0	0	0
98	Ig heavy chain V-II region ARH-77 OS=Homo sapiens PE=4 SV=1	HV209_HUMAN	16	8.45	Homo sapiens	0.00570617	0.00592192	0	0.00568098	0.00393859	0	0.00524491	0.00345469	0.00479553	0.00364359	0	0	0	0	0
173	Resistin OS=Homo sapiens GN=RETN PE=2 SV=1	RETN_HUMAN	11	6.89	Homo sapiens	0.00558728	0	0	0	0	0.00763486	0	0	0.00256028	0.00358751	0	0	0	0	0
122	Ig lambda chain V-III region SH OS=Homo sapiens PE=1 SV=1	LV301_HUMAN	11	6.5	Homo sapiens	0.00428079	0.00582423	0	0.00163754	0.00287502	0	0.00336329	0.00869197	0	0.00345647	0	0	0	0	0
228	Four and a half LIM domains protein 1 OS=Homo sapiens GN=FHL1 PE=1 SV=4	FHL1_HUMAN	36	9.15	unknown	0	0	0	0	0.00043924	0	0	0	0	0.00273558	0	0	0	0	0
187	Lipopolysaccharide-binding protein OS=Homo sapiens GN=LBP PE=1 SV=3	LBP_HUMAN	53	6.68	Homo sapiens	0	0	0	0	0	0.00239411	0	0	0	0.00223838	0	0	0	0	0
178	Pleckstrin OS=Homo sapiens GN=PLEK PE=1 SV=3	PLEK_HUMAN	40	8.45	Homo sapiens	0	0	0	0	0.00138182	0	0	0	0.000712997	0.00197621	0	0	0	0	0
139	Solute carrier family 2, facilitated glucose transporter member 3 OS=Homo sapiens GN=SLC2A3 PE=2 SV=1	GTR3_HUMAN	54	7.24	Homo sapiens	0	0	0.00254487	0.00101098	0.00175668	0	0	0	0.000776974	0.00183153	0	0	0	0	0
203	Histone H4 OS=Homo sapiens GN=HIST1H4A PE=1 SV=2	H4_HUMAN	11	11.91	unknown	0	0	0	0	0.00143751	0	0	0.00989806	0	0.00180494	0	0	0	0	0
125	Ig heavy chain V-III region GA OS=Homo sapiens PE=1 SV=1	HV308_HUMAN	13	10.02	Homo sapiens	0	0.00243225	0	0	0.00120919	0	0.00145766	0	0	0.00152726	0	0	0	0	0
133	Trypsin-1 OS=Homo sapiens GN=PRSS1 PE=1 SV=1	TRY1_HUMAN	27	6.49	unknown	0.00332813	0	0	0	0.00175604	0.00238358	0.000700082	0	0.000497656	0.00143944	0	0	0	0	0
210	Platelet basic protein OS=Homo sapiens GN=PPBP PE=1 SV=3	CXCL7_HUMAN	14	9.07	Homo sapiens	0	0	0	0	0	0	0	0	0	0.0013579	0	0	0	0	0
121	Lysozyme C OS=Homo sapiens GN=LYZ PE=1 SV=1	LYSC_HUMAN	17	9.35	Homo sapiens	0.00624813	0.00376862	0	0.00215175	0	0	0.00217903	0.00318841	0.00330686	0.00120306	0	0	0	0	0
180	Integrin alpha-2 OS=Homo sapiens GN=ITGA2 PE=1 SV=1	ITA2_HUMAN	129	4.95	unknown	0	0	0	0	0.000919751	0	0	0	0	0.000536777	0	0	0	0	0
161	Junction plakoglobin OS=Homo sapiens GN=JUP PE=1 SV=3	PLAK_HUMAN	82	6.05	Homo sapiens	0	0	0.000466191	0.000446095	0.000481222	0	0	0	0.000759635	0.000473963	0	0	0	0	0
166	von Willebrand factor OS=Homo sapiens GN=VWF PE=1 SV=4	VWF_HUMAN	309	5.15	Homo sapiens	9.65654e-05	0	0	0	0.000332468	0	0	0	0	0.000350835	0	0	0	0	0
182	ATP synthase subunit alpha, mitochondrial OS=Homo sapiens GN=ATP5A1 PE=1 SV=1	ATPA_HUMAN	60	9.56	Homo sapiens	0	0	0	0	0.00026199	0	0	0	0	0.000340868	0	0	0	0	0
141	ATP synthase subunit beta, mitochondrial OS=Homo sapiens GN=ATP5B PE=1 SV=3	ATPB_HUMAN	57	5.07	Homo sapiens	0	0	0	0.000632578	0.00110557	0	0.000332448	0.00215286	0.000736081	0.000333519	0	0	0	0	0
87	Desmoplakin OS=Homo sapiens GN=DSP PE=1 SV=3	DESP_HUMAN	332	6.78	Homo sapiens	9.45555e-05	0	0.000295247	0.000411137	0.000190299	0	0	7.99211e-05	0.000613583	0.000212909	0	0	0	0	0
175	Filaggrin OS=Homo sapiens GN=FLG PE=1 SV=3	FILA_HUMAN	435	9.6	Homo sapiens	0.000172013	0	0	0	9.10345e-05	0	0	0	9.6452e-05	0.000112166	0	0	0	0	0
129	Filaggrin-2 OS=Homo sapiens GN=FLG2 PE=1 SV=1	FILA2_HUMAN	248	8.35	Homo sapiens	0.00036814	0.00038206	0.000308073	7.2633e-05	9.56409e-05	0	0	0.000111314	0.00031127	8.0058e-05	0	0	0	0	0
112	Ig heavy chain V-III region WEA OS=Homo sapiens PE=1 SV=1	HV302_HUMAN	12	8.7	Homo sapiens	0	0	0	0.00375271	0	0	0	0	0.0116626	0	0	0	0	0	0
144	Keratin, type II cytoskeletal 6C OS=Homo sapiens GN=KRT6C PE=1 SV=3	K2C6C_HUMAN	60	8.16	Homo sapiens	0	0	0.0192179	0.00686076	0.0123792	0	0.00252029	0	0.00908568	0	0	0	0	0	0
201	Keratin, type II cytoskeletal 6B OS=Homo sapiens GN=KRT6B PE=1 SV=5	K2C6B_HUMAN	60	8.16	unknown	0	0	0	0	0.00395316	0	0	0	0.00897073	0	0	0	0	0	0
100	Ig heavy chain V-I region HG3 OS=Homo sapiens PE=3 SV=1	HV102_HUMAN	13	9.4	Homo sapiens	0.0105345	0	0	0.008419	0	0	0	0	0.00418927	0	0	0	0	0	0
160	Ig kappa chain V-I region DEE OS=Homo sapiens PE=1 SV=1	KV105_HUMAN	12	8.46	Homo sapiens	0	0	0	0	0.00132342	0	0	0	0.00397851	0	0	0	0	0	0
147	Neutrophil defensin 1 OS=Homo sapiens GN=DEFA1 PE=1 SV=1	DEF1_HUMAN	10	7.04	Homo sapiens	0	0	0	0.0018044	0.00315321	0	0.00653968	0	0.00355262	0	0	0	0	0	0
207	Ig kappa chain V-II region TEW OS=Homo sapiens PE=1 SV=1	KV204_HUMAN	12	8.85	Homo sapiens	0	0	0	0	0	0	0	0	0.00306799	0	0	0	0	0	0
151	Ig kappa chain V-III region NG9 (Fragment) OS=Homo sapiens PE=2 SV=1	KV303_HUMAN	11	9.53	unknown	0	0	0	0.00409386	0.00287502	0	0.00164491	0	0.0030538	0	0	0	0	0	0
168	HLA class I histocompatibility antigen, A-11 alpha chain OS=Homo sapiens GN=HLA-A PE=1 SV=1	1A11_HUMAN	41	6.06	unknown	0	0	0	0	0.00481964	0	0	0	0.00271082	0	0	0	0	0	0
193	HLA class I histocompatibility antigen, B-56 alpha chain OS=Homo sapiens GN=HLA-B PE=1 SV=1	1B56_HUMAN	40	6.06	unknown	0	0	0	0.00160344	0.00553163	0	0	0	0.00192815	0	0	0	0	0	0
185	Ig kappa chain V-III region IARC/BL41 OS=Homo sapiens PE=4 SV=1	KV311_HUMAN	14	4.59	unknown	0	0	0	0.00132399	0	0	0	0	0.00157782	0	0	0	0	0	0
171	Voltage-dependent anion-selective channel protein 3 OS=Homo sapiens GN=VDAC3 PE=1 SV=1	VDAC3_HUMAN	31	8.9	Homo sapiens	0	0	0	0	0.00203653	0	0	0	0.00135344	0	0	0	0	0	0
156	CD9 antigen OS=Homo sapiens GN=CD9 PE=1 SV=4	CD9_HUMAN	25	7.19	Homo sapiens	0	0	0	0.00146319	0.00126402	0	0	0	0.00108921	0	0	0	0	0	0
251	Endonuclease domain-containing 1 protein OS=Homo sapiens GN=ENDOD1 PE=1 SV=2	ENDD1_HUMAN	55	5.38	Homo sapiens	0	0	0	0	0	0	0	0	0.000762847	0	0	0	0	0	0
174	Band 3 anion transport protein OS=Homo sapiens GN=SLC4A1 PE=1 SV=3	B3AT_HUMAN	102	4.84	Homo sapiens	0	0.000618936	0	0.000535223	0	0	0	0	0.000617009	0	0	0	0	0	0
194	Leukocyte surface antigen CD47 OS=Homo sapiens GN=CD47 PE=1 SV=1	CD47_HUMAN	35	7.27	Homo sapiens	0	0	0	0	0	0	0	0	0.000394102	0	0	0	0	0	0
140	Desmocollin-1 OS=Homo sapiens GN=DSC1 PE=1 SV=2	DSC1_HUMAN	100	5.08	Homo sapiens	0.000313924	0	0.000382277	0.000365488	0.00039541	0	0	0	0.000339486	0	0	0	0	0	0
200	Integrin alpha-6 OS=Homo sapiens GN=ITGA6 PE=1 SV=5	ITA6_HUMAN	127	6.57	Homo sapiens	0	0	0	0	0.000248823	0	0	0	0.000330367	0	0	0	0	0	0
216	Amine oxidase [flavin-containing] B OS=Homo sapiens GN=MAOB PE=1 SV=3	AOFB_HUMAN	59	7.55	unknown	0	0	0	0.000925301	0.000266431	0	0	0	0.000227741	0	0	0	0	0	0
198	Suprabasin OS=Homo sapiens GN=SBSN PE=1 SV=2	SBSN_HUMAN	61	7.01	Homo sapiens	0.0014967	0	0	0.000295295	0.000259223	0	0	0	0.000220274	0	0	0	0	0	0
221	Coagulation factor XII OS=Homo sapiens GN=F12 PE=1 SV=3	FA12_HUMAN	68	7.76	Homo sapiens	0	0	0	0	0	0	0	0	0.000216564	0	0	0	0	0	0
241	tRNA-dihydrouridine(47) synthase [NAD(P)(+)]-like OS=Homo sapiens GN=DUS3L PE=1 SV=2	DUS3L_HUMAN	72	8.4	unknown	0	0	0	0	0	0	0	0	0.000204533	0	0	0	0	0	0
206	Desmoglein-1 OS=Homo sapiens GN=DSG1 PE=1 SV=2	DSG1_HUMAN	114	4.66	Homo sapiens	0	0	0	0.000560182	0	0	0	0	0.000117866	0	0	0	0	0	0
233	40S ribosomal protein S13 OS=Homo sapiens GN=RPS13 PE=1 SV=2	RS13_HUMAN	17	11.19	unknown	0	0	0	0	0	0	0	0.00562608	0	0	0	0	0	0	0
219	GTP-binding nuclear protein Ran OS=Homo sapiens GN=RAN PE=1 SV=3	RAN_HUMAN	24	7.59	Homo sapiens	0	0	0	0	0	0	0	0.00453661	0	0	0	0	0	0	0
172	Keratin, type II cuticular Hb6 OS=Homo sapiens GN=KRT86 PE=1 SV=1	KRT86_HUMAN	53	5.35	unknown	0	0.0036186	0	0	0	0	0	0.00409911	0	0	0	0	0	0	0
234	Histone H2A type 1-C OS=Homo sapiens GN=HIST1H2AC PE=1 SV=3	H2A1C_HUMAN	14	11.66	unknown	0	0	0	0	0	0	0	0.00387164	0	0	0	0	0	0	0
135	Keratin, type II cuticular Hb5 OS=Homo sapiens GN=KRT85 PE=1 SV=1	KRT85_HUMAN	56	6.49	unknown	0	0.00589879	0	0	0	0.000735451	0	0.00365105	0	0	0	0	0	0	0
215	Keratin, type II cuticular Hb4 OS=Homo sapiens GN=KRT84 PE=2 SV=2	KRT84_HUMAN	65	7.61	unknown	0	0	0	0	0	0	0	0.00294141	0	0	0	0	0	0	0
177	Keratin, type I cuticular Ha1 OS=Homo sapiens GN=KRT31 PE=1 SV=3	K1H1_HUMAN	47	4.53	unknown	0	0.00570274	0	0	0	0	0	0.00288112	0	0	0	0	0	0	0
196	Adenosylhomocysteinase OS=Homo sapiens GN=AHCY PE=1 SV=4	SAHH_HUMAN	48	6.29	unknown	0	0	0	0	0	0	0	0.00284475	0	0	0	0	0	0	0
224	Alpha-enolase OS=Homo sapiens GN=ENO1 PE=1 SV=2	ENOA_HUMAN	47	7.46	Homo sapiens	0	0	0	0	0	0	0	0.00203497	0	0	0	0	0	0	0
261	60S ribosomal protein L12 OS=Homo sapiens GN=RPL12 PE=1 SV=1	RL12_HUMAN	18	10.11	unknown	0	0	0	0	0	0	0	0.00153718	0	0	0	0	0	0	0
246	40S ribosomal protein S9 OS=Homo sapiens GN=RPS9 PE=1 SV=3	RS9_HUMAN	23	11.32	unknown	0	0	0	0	0	0	0	0.00120301	0	0	0	0	0	0	0
250	L-lactate dehydrogenase A chain OS=Homo sapiens GN=LDHA PE=1 SV=2	LDHA_HUMAN	37	8.45	unknown	0	0	0	0	0	0	0	0.000747815	0	0	0	0	0	0	0
262	60 kDa heat shock protein, mitochondrial OS=Homo sapiens GN=HSPD1 PE=1 SV=2	CH60_HUMAN	61	5.55	Homo sapiens	0	0	0	0	0	0	0	0.000453593	0	0	0	0	0	0	0
260	Synaptotagmin-like protein 4 OS=Homo sapiens GN=SYTL4 PE=1 SV=2	SYTL4_HUMAN	76	9.42	Homo sapiens	0	0	0	0	0	0	0	0.000363235	0	0	0	0	0	0	0
232	Collagen alpha-1(XXI) chain OS=Homo sapiens GN=COL21A1 PE=2 SV=1	COLA1_HUMAN	99	8.48	unknown	0	0	0	0	0	0	0	0.000268018	0	0	0	0	0	0	0
222	Ig kappa chain V-III region GOL OS=Homo sapiens PE=1 SV=1	KV307_HUMAN	12	9.53	unknown	0	0	0	0	0	0	0.0094511	0	0	0	0	0	0	0	0
220	Ig kappa chain V-I region Scw OS=Homo sapiens PE=1 SV=1	KV117_HUMAN	12	8.85	unknown	0	0	0	0.00525379	0	0	0.00603132	0	0	0	0	0	0	0	0
148	Lipocalin-1 OS=Homo sapiens GN=LCN1 PE=1 SV=1	LCN1_HUMAN	19	5.3	unknown	0.00720177	0	0	0.00192525	0	0	0.000997345	0	0	0	0	0	0	0	0
258	Lactotransferrin OS=Homo sapiens GN=LTF PE=1 SV=6	TRFL_HUMAN	78	8.17	unknown	0	0	0	0	0	0	0.000363504	0	0	0	0	0	0	0	0
238	HLA class I histocompatibility antigen, B-40 alpha chain OS=Homo sapiens GN=HLA-B PE=1 SV=1	1B40_HUMAN	41	6.51	unknown	0	0	0	0	0.00617171	0	0	0	0	0	0	0	0	0	0
152	Hemoglobin subunit alpha OS=Homo sapiens GN=HBA1 PE=1 SV=2	HBA_HUMAN	15	9.09	Homo sapiens	0	0	0	0.00185358	0.00317165	0	0	0	0	0	0	0	0	0	0
242	Cathelicidin antimicrobial peptide OS=Homo sapiens GN=CAMP PE=1 SV=1	CAMP_HUMAN	19	10.03	Homo sapiens	0	0	0	0	0.00207325	0	0	0	0	0	0	0	0	0	0
235	Beta-2-microglobulin OS=Homo sapiens GN=B2M PE=1 SV=1	B2MG_HUMAN	14	6.51	Homo sapiens	0	0	0	0	0.00169421	0	0	0	0	0	0	0	0	0	0
167	Platelet glycoprotein Ib beta chain OS=Homo sapiens GN=GP1BB PE=1 SV=1	GP1BB_HUMAN	22	9.37	Homo sapiens	0	0	0.00184911	0	0.00144062	0	0	0	0	0	0	0	0	0	0
245	10 kDa heat shock protein, mitochondrial OS=Homo sapiens GN=HSPE1 PE=1 SV=2	CH10_HUMAN	11	9.49	unknown	0	0	0	0	0.00142904	0	0	0	0	0	0	0	0	0	0
239	Voltage-dependent anion-selective channel protein 2 OS=Homo sapiens GN=VDAC2 PE=1 SV=2	VDAC2_HUMAN	32	7.65	unknown	0	0	0	0	0.000987516	0	0	0	0	0	0	0	0	0	0
252	Thioredoxin-dependent peroxide reductase, mitochondrial OS=Homo sapiens GN=PRDX3 PE=1 SV=3	PRDX3_HUMAN	28	7.88	Homo sapiens	0	0	0	0	0.000561408	0	0	0	0	0	0	0	0	0	0
254	Junctional adhesion molecule A OS=Homo sapiens GN=F11R PE=1 SV=1	JAM1_HUMAN	33	8.02	Homo sapiens	0	0	0	0	0.00047917	0	0	0	0	0	0	0	0	0	0
218	Disintegrin and metalloproteinase domain-containing protein 10 OS=Homo sapiens GN=ADAM10 PE=1 SV=1	ADA10_HUMAN	84	7.81	Homo sapiens	0	0	0	0	0.000377306	0	0	0	0	0	0	0	0	0	0
253	Choline transporter-like protein 1 OS=Homo sapiens GN=SLC44A1 PE=1 SV=1	CTL1_HUMAN	73	8.69	unknown	0	0	0	0	0.000215335	0	0	0	0	0	0	0	0	0	0
134	Sorbin and SH3 domain-containing protein 2 OS=Homo sapiens GN=SORBS2 PE=1 SV=3	SRBS2_HUMAN	124	8.42	unknown	0	0	0	0	0.000190154	0	0	0	0	0	0	0	0	0	0
263	Complement factor B OS=Homo sapiens GN=CFB PE=1 SV=2	CFAB_HUMAN	86	7.07	Homo sapiens	0	0	0	0	0.000182784	0	0	0	0	0	0	0	0	0	0
264	Latent-transforming growth factor beta-binding protein 1 OS=Homo sapiens GN=LTBP1 PE=1 SV=4	LTBP1_HUMAN	187	5.85	Homo sapiens	0	0	0	0	8.45595e-05	0	0	0	0	0	0	0	0	0	0
188	Polymeric immunoglobulin receptor OS=Homo sapiens GN=PIGR PE=1 SV=4	PIGR_HUMAN	83	5.43	unknown	0.00036226	0	0	0.000657744	0	0	0	0	0	0	0	0	0	0	0
190	Serine/threonine-protein kinase N3 OS=Homo sapiens GN=PKN3 PE=1 SV=1	PKN3_HUMAN	99	8.56	unknown	0	0	0	0.000181949	0	0	0	0	0	0	0	0	0	0	0
195	Protein S100-A7 OS=Homo sapiens GN=S100A7 PE=1 SV=4	S10A7_HUMAN	11	6.78	Homo sapiens	0.0110935	0	0.00717346	0	0	0	0	0	0	0	0	0	0	0	0
199	Protein S100-A8 OS=Homo sapiens GN=S100A8 PE=1 SV=1	S10A8_HUMAN	11	7.07	Homo sapiens	0.00544603	0	0.00717346	0	0	0	0	0	0	0	0	0	0	0	0
244	IQ and AAA domain-containing protein 1-like OS=Homo sapiens GN=IQCA1L PE=3 SV=2	IQCAL_HUMAN	95	9.79	unknown	0	0	0.000830611	0	0	0	0	0	0	0	0	0	0	0	0
157	Calmodulin-like protein 5 OS=Homo sapiens GN=CALML5 PE=1 SV=2	CALL5_HUMAN	16	4.05	Homo sapiens	0.00855926	0	0	0	0	0	0	0	0	0	0	0	0	0	0
227	Prolactin-inducible protein OS=Homo sapiens GN=PIP PE=1 SV=1	PIP_HUMAN	17	8.18	unknown	0.0071392	0	0	0	0	0	0	0	0	0	0	0	0	0	0
225	Fatty acid-binding protein, epidermal OS=Homo sapiens GN=FABP5 PE=1 SV=3	FABP5_HUMAN	15	7.05	Homo sapiens	0.00408208	0	0	0	0	0	0	0	0	0	0	0	0	0	0
247	Caspase-14 OS=Homo sapiens GN=CASP14 PE=1 SV=2	CASPE_HUMAN	28	5.28	unknown	0.00213951	0	0	0	0	0	0	0	0	0	0	0	0	0	0
[truncated: 7 more columns]

## Sheet: Category
							CHOL					DOPG					DOTAP							Acute phase																		Coagulation
							21.917	21.119	17.097	36.6412	42.1832	15.7675	35.765	24.4563	47.7391	33.7475	30.5481	53.6856	30.6904	50.507	11.4244			Accession Number	CHOL_A	CHOL_B	CHOL_C	CHOL_D	CHOL_E	DOPG_A	DOPG_B	DOPG_C	DOPG_D	DOPG_E	DOTAP_A	DOTAP_B	DOTAP_C	DOTAP_D	DOTAP_E			Accession Number	CHOL_A	CHOL_B	CHOL_C	CHOL_D	CHOL_E	DOPG_A	DOPG_B
#	Identified Proteins (264)	Accession Number	Categpry	Molecular Weight	pI	Taxonomy	CHOL_A	CHOL_B	CHOL_C	CHOL_D	CHOL_E	DOPG_A	DOPG_B	DOPG_C	DOPG_D	DOPG_E	DOTAP_A	DOTAP_B	DOTAP_C	DOTAP_D	DOTAP_E			A1AG1_HUMAN	0.00256084	0	0	0	0.000661711	0	0	0	0	0	0.000891795	0.000572385	0.00227309	0.00247536	0			A2AP_HUMAN	0	0	0	0	0	0	0
137	Alpha-1-acid glycoprotein 1 OS=Homo sapiens GN=ORM1 PE=1 SV=1	A1AG1_HUMAN	Acute phase	24	4.66	Homo sapiens	0.00256084	0	0	0	0.000661711	0	0	0	0	0	0.000891795	0.000572385	0.00227309	0.00247536	0			A1AG2_HUMAN	0	0	0	0	0	0	0	0	0	0	0.00181614	0	0.00179143	0	0			FA10_HUMAN	0	0	0	0	0	0	0
192	Alpha-1-acid glycoprotein 2 OS=Homo sapiens GN=ORM2 PE=1 SV=2	A1AG2_HUMAN	Acute phase	24	4.76	Homo sapiens	0	0	0	0	0	0	0	0	0	0	0.00181614	0	0.00179143	0	0			A1AT_HUMAN	0	0	0	0.000974825	0.0025227	0	0	0.00203429	0	0	0.00465189	0.0042836	0.0161811	0.00407244	0.00122205			FA12_HUMAN	0	0	0	0	0	0	0
59	Alpha-1-antitrypsin OS=Homo sapiens GN=SERPINA1 PE=1 SV=3	A1AT_HUMAN	Acute phase	47	5.31	Homo sapiens	0	0	0	0.000974825	0.0025227	0	0	0.00203429	0	0	0.00465189	0.0042836	0.0161811	0.00407244	0.00122205			A1BG_HUMAN	0	0	0	0	0	0	0	0	0	0	0	0.000290814	0	0	0			FA5_HUMAN	0.000843455	0.000125473	0	0.000505855	0.000627141	0.00100705	0.00033452
226	Alpha-1B-glycoprotein OS=Homo sapiens GN=A1BG PE=1 SV=4	A1BG_HUMAN	Acute phase	54	5.71	Homo sapiens	0	0	0	0	0	0	0	0	0	0	0	0.000290814	0	0	0			A2MG_HUMAN	0.00457651	0.0071727	0.000468399	0.00318339	0.00625332	0	0.000116255	0	0.000469632	0.00321945	0.00395422	0.00422494	0.00379497	0.00226767	0.0026425			FA9_HUMAN	0	0	0	0	0	0	0
20	Alpha-2-macroglobulin OS=Homo sapiens GN=A2M PE=1 SV=3	A2MG_HUMAN	Acute phase	163	6.43	Homo sapiens	0.00457651	0.0071727	0.000468399	0.00318339	0.00625332	0	0.000116255	0	0.000469632	0.00321945	0.00395422	0.00422494	0.00379497	0.00226767	0.0026425			AACT_HUMAN	0	0	0	0	0	0	0	0	0	0	0.00547633	0.00193846	0.00907787	0.000951266	0			FIBA_HUMAN	0.00192905	0.00397531	0.000830052	0.000764271	0.00133058	0.00290675	0.00177096
93	Alpha-1-antichymotrypsin OS=Homo sapiens GN=SERPINA3 PE=1 SV=2	AACT_HUMAN	Acute phase	48	5.19	Homo sapiens	0	0	0	0	0	0	0	0	0	0	0.00547633	0.00193846	0.00907787	0.000951266	0			CD36_HUMAN	0.00144328	0	0.00220911	0.00291993	0.00462364	0	0	0	0.00290628	0.00373782	0	0.00165682	0	0.00161687	0.00118741			FIBB_HUMAN	0.00598646	0.0121104	0.00420342	0.011699	0.00973579	0.0139485	0.0225071
70	Platelet glycoprotein 4 OS=Homo sapiens GN=CD36 PE=1 SV=2	CD36_HUMAN	Acute phase	53	8.06	Homo sapiens	0.00144328	0	0.00220911	0.00291993	0.00462364	0	0	0	0.00290628	0.00373782	0	0.00165682	0	0.00161687	0.00118741			CRP_HUMAN	0	0	0	0	0	0	0	0	0	0	0.00696092	0.00570146	0	0.0095081	0.0163003			FIBG_HUMAN	0.00643202	0.0106547	0.00491843	0.00576478	0.00805694	0.0130258	0.0155929
92	C-reactive protein OS=Homo sapiens GN=CRP PE=1 SV=1	CRP_HUMAN	Acute phase	25	5.32	Homo sapiens	0	0	0	0	0	0	0	0	0	0	0.00696092	0.00570146	0	0.0095081	0.0163003			CXCL7_HUMAN	0	0	0	0	0	0	0	0	0	0.0013579	0	0	0	0	0			ITA2_HUMAN	0	0	0	0	0.000919751	0	0
210	Platelet basic protein OS=Homo sapiens GN=PPBP PE=1 SV=3	CXCL7_HUMAN	Acute phase	14	9.07	Homo sapiens	0	0	0	0	0	0	0	0	0	0.0013579	0	0	0	0	0			FETUA_HUMAN	0	0	0	0	0	0	0	0	0	0	0.00251865	0.00225043	0.000545264	0	0			ITA2B_HUMAN	0	0	0	0.00120563	0.00216891	0	0
149	Alpha-2-HS-glycoprotein OS=Homo sapiens GN=AHSG PE=1 SV=1	FETUA_HUMAN	Acute phase	39	5.52	Homo sapiens	0	0	0	0	0	0	0	0	0	0	0.00251865	0.00225043	0.000545264	0	0			GP1BA_HUMAN	0	0	0	0	0	0	0	0	0	0	0	0.000525752	0	0.000640116	0			ITA6_HUMAN	0	0	0	0	0.000248823	0	0
229	Platelet glycoprotein Ib alpha chain OS=Homo sapiens GN=GP1BA PE=1 SV=2	GP1BA_HUMAN	Acute phase	72	6.24	Homo sapiens	0	0	0	0	0	0	0	0	0	0	0	0.000525752	0	0.000640116	0			GP1BB_HUMAN	0	0	0.00184911	0	0.00144062	0	0	0	0	0	0	0	0	0	0			ITB1_HUMAN	0.000874175	0	0.00154769	0.000620373	0.00251463	0.000468014	0
167	Platelet glycoprotein Ib beta chain OS=Homo sapiens GN=GP1BB PE=1 SV=1	GP1BB_HUMAN	Acute phase	22	9.37	Homo sapiens	0	0	0.00184911	0	0.00144062	0	0	0	0	0	0	0	0	0	0			GPIX_HUMAN	0.0072078	0.00662645	0.00616224	0.00620769	0.00707261	0	0	0	0.00441649	0	0	0	0	0.000704889	0			ITB3_HUMAN	0.00245965	0.0023599	0.00225246	0.00386872	0.00763223	0.00170506	0.00075196
110	Platelet glycoprotein IX OS=Homo sapiens GN=GP9 PE=1 SV=3	GPIX_HUMAN	Acute phase	19	6.32	Homo sapiens	0.0072078	0.00662645	0.00616224	0.00620769	0.00707261	0	0	0	0.00441649	0	0	0	0	0.000704889	0			HPT_HUMAN	0.0104931	0.00737989	0.00825751	0.0066564	0.00930106	0	0.00144428	0.00664652	0.00403203	0.00591569	0.010422	0.012966	0.0122976	0.00924142	0			KNG1_HUMAN	0	0	0	0	0	0	0
30	Haptoglobin OS=Homo sapiens GN=HP PE=1 SV=1	HPT_HUMAN	Acute phase	45	6.56	Homo sapiens	0.0104931	0.00737989	0.00825751	0.0066564	0.00930106	0	0.00144428	0.00664652	0.00403203	0.00591569	0.010422	0.012966	0.0122976	0.00924142	0			HPTR_HUMAN	0.00819348	0.0052524	0	0.0065238	0.0064823	0.00325354	0.00335429	0	0.00484115	0.0060838	0.00284413	0.00523389	0	0.00101904	0			PLMN_HUMAN	0.000330413	0.00433801	0	0.00370407	0.00381939	0.00047031	0.00287015
84	Haptoglobin-related protein OS=Homo sapiens GN=HPR PE=2 SV=2	HPTR_HUMAN	Acute phase	39	7.11	Homo sapiens	0.00819348	0.0052524	0	0.0065238	0.0064823	0.00325354	0.00335429	0	0.00484115	0.0060838	0.00284413	0.00523389	0	0.00101904	0			LBP_HUMAN	0	0	0	0	0	0.00239411	0	0	0	0.00223838	0	0	0	0	0			PROS_HUMAN	0	0	0	0	0	0	0
187	Lipopolysaccharide-binding protein OS=Homo sapiens GN=LBP PE=1 SV=3	LBP_HUMAN	Acute phase	53	6.68	Homo sapiens	0	0	0	0	0	0.00239411	0	0	0	0.00223838	0	0	0	0	0			PLF4_HUMAN	0.00681274	0	0.00520562	0.0123851	0.00718729	0	0	0.011107	0.0158839	0.0188353	0	0.0104683	0	0.00539417	0			PROZ_HUMAN	0	0	0	0	0	0	0
67	Platelet factor 4 OS=Homo sapiens GN=PF4 PE=1 SV=2	PLF4_HUMAN	Acute phase	11	8.78	Homo sapiens	0.00681274	0	0.00520562	0.0123851	0.00718729	0	0	0.011107	0.0158839	0.0188353	0	0.0104683	0	0.00539417	0			SAA2_HUMAN	0	0	0	0	0	0	0	0	0	0	0	0	0	0.0023812	0			THRB_HUMAN	0	0	0	0	0	0	0
237	Serum amyloid A-2 protein OS=Homo sapiens GN=SAA2 PE=1 SV=1	SAA2_HUMAN	Acute phase	14	9.48	Homo sapiens	0	0	0	0	0	0	0	0	0	0	0	0	0	0.0023812	0			SAA4_HUMAN	0	0	0	0	0	0	0	0	0	0	0	0.00160779	0.00286629	0.00529501	0			TSP1_HUMAN	0.000476434	0.000857057	0.00121346	0	0.00238795	0.000332593	0
189	Serum amyloid A-4 protein OS=Homo sapiens GN=SAA4 PE=1 SV=2	SAA4_HUMAN	Acute phase	15	9.38	Homo sapiens	0	0	0	0	0	0	0	0	0	0	0	0.00160779	0.00286629	0.00529501	0			SAMP_HUMAN	0	0.00313894	0.00381958	0	0	0.00335934	0	0.00110423	0	0	0.00348541	0.00178891	0.00347663	0.00158423	0.010491
109	Serum amyloid P-component OS=Homo sapiens GN=APCS PE=1 SV=2	SAMP_HUMAN	Acute phase	25	6.52	Homo sapiens	0	0.00313894	0.00381958	0	0	0.00335934	0	0.00110423	0	0	0.00348541	0.00178891	0.00347663	0.00158423	0.010491
184	Alpha-2-antiplasmin OS=Homo sapiens GN=SERPINF2 PE=1 SV=3	A2AP_HUMAN	Coagulation	55	6.24	Homo sapiens	0	0	0	0	0	0	0	0	0	0	0.00119063	0.000937211	0	0.000832761	0
91	Coagulation factor X OS=Homo sapiens GN=F10 PE=1 SV=2	FA10_HUMAN	Coagulation	55	5.74	Homo sapiens	0	0	0	0	0	0	0	0	0	0	0.00655109	0.00254065	0.00196271	0.00227942	0.00690721
221	Coagulation factor XII OS=Homo sapiens GN=F12 PE=1 SV=3	FA12_HUMAN	Coagulation	68	7.76	Homo sapiens	0	0	0	0	0	0	0	0	0.000216564	0	0	0	0	0	0
54	Coagulation factor V OS=Homo sapiens GN=F5 PE=1 SV=4	FA5_HUMAN	Coagulation	252	5.95	Homo sapiens	0.000843455	0.000125473	0	0.000505855	0.000627141	0.00100705	0.00033452	0.000269613	0.000497633	0.000627368	0.000215275	0.000438032	0.000733841	0.000444923	0.000447049
65	Coagulation factor IX OS=Homo sapiens GN=F9 PE=1 SV=2	FA9_HUMAN	Coagulation	52	5.16	Homo sapiens	0	0	0	0	0	0	0	0	0	0	0.00840567	0.00579402	0.00543669	0.00470138	0.00231479
36	Fibrinogen alpha chain OS=Homo sapiens GN=FGA PE=1 SV=2	FIBA_HUMAN	Coagulation	95	5.87	Homo sapiens	0.00192905	0.00397531	0.000830052	0.000764271	0.00133058	0.00290675	0.00177096	0.00274035	0.00395823	0.00104108	0.00356031	0.0028109	0.00766475	0.00291458	0.00339432
13	Fibrinogen beta chain OS=Homo sapiens GN=FGB PE=1 SV=2	FIBB_HUMAN	Coagulation	56	8.38	Homo sapiens	0.00598646	0.0121104	0.00420342	0.011699	0.00973579	0.0139485	0.0225071	0.00805507	0.00996321	0.00935583	0.0293887	0.018681	0.0242469	0.0167461	0.0187735
18	Fibrinogen gamma chain OS=Homo sapiens GN=FGG PE=1 SV=3	FIBG_HUMAN	Coagulation	52	5.32	Homo sapiens	0.00643202	0.0106547	0.00491843	0.00576478	0.00805694	0.0130258	0.0155929	0.00760079	0.00765064	0.00609687	0.0170151	0.0128723	0.0112913	0.00951797	0.0118185
180	Integrin alpha-2 OS=Homo sapiens GN=ITGA2 PE=1 SV=1	ITA2_HUMAN	Coagulation	129	4.95	unknown	0	0	0	0	0.000919751	0	0	0	0	0.000536777	0	0	0	0	0
85	Integrin alpha-IIb OS=Homo sapiens GN=ITGA2B PE=1 SV=3	ITA2B_HUMAN	Coagulation	113	5.03	Homo sapiens	0	0	0	0.00120563	0.00216891	0	0	0	0.00086721	0.000428055	0	0.000776697	0	0.000466479	0
200	Integrin alpha-6 OS=Homo sapiens GN=ITGA6 PE=1 SV=5	ITA6_HUMAN	Coagulation	127	6.57	Homo sapiens	0	0	0	0	0.000248823	0	0	0	0.000330367	0	0	0	0	0	0
86	Integrin beta-1 OS=Homo sapiens GN=ITGB1 PE=1 SV=2	ITB1_HUMAN	Coagulation	88	5.04	Homo sapiens	0.000874175	0	0.00154769	0.000620373	0.00251463	0.000468014	0	0.000452281	0.000793542	0.002243	0	0.000118969	0	0	0
35	Integrin beta-3 OS=Homo sapiens GN=ITGB3 PE=1 SV=2	ITB3_HUMAN	Coagulation	87	4.85	Homo sapiens	0.00245965	0.0023599	0.00225246	0.00386872	0.00763223	0.00170506	0.00075196	0.00218565	0.00442702	0.00569781	0	0.0037629	0	0.00287632	0
73	Kininogen-1 OS=Homo sapiens GN=KNG1 PE=1 SV=2	KNG1_HUMAN	Coagulation	72	6.8	Homo sapiens	0	0	0	0	0	0	0	0	0	0	0.00408738	0.00303642	0.00513688	0.00357355	0
32	Plasminogen OS=Homo sapiens GN=PLG PE=1 SV=2	PLMN_HUMAN	Coagulation	91	7.25	Homo sapiens	0.000330413	0.00433801	0	0.00370407	0.00381939	0.00047031	0.00287015	0.000892412	0.00237914	0.0013255	0.006114	0.0049374	0.00381538	0.00580203	0.00224513
43	Vitamin K-dependent protein S OS=Homo sapiens GN=PROS1 PE=1 SV=1	PROS_HUMAN	Coagulation	75	5.37	Homo sapiens	0	0	0	0	0	0	0	0	0	0	0.00713295	0.00750223	0.00694399	0.00818415	0.00706021
138	Vitamin K-dependent protein Z OS=Homo sapiens GN=PROZ PE=1 SV=2	PROZ_HUMAN	Coagulation	45	5.87	Homo sapiens	0	0	0	0	0	0	0	0	0	0	0.00315056	0.0029462	0.00194176	0	0
19	Prothrombin OS=Homo sapiens GN=F2 PE=1 SV=2	THRB_HUMAN	Coagulation	70	5.7	Homo sapiens	0	0	0	0	0	0	0	0	0	0.000575807	0.0216673	0.017732	0.0207878	0.0231112	0.0150898
27	Thrombospondin-1 OS=Homo sapiens GN=THBS1 PE=1 SV=2	TSP1_HUMAN	Coagulation	129	4.51	Homo sapiens	0.000476434	0.000857057	0.00121346	0	0.00238795	0.000332593	0	0.00084402	0.000592028	0.00192183	0.00490579	0.00671447	0.00100526	0.00849992	0.0104784
99	Complement C1q subcomponent subunit A OS=Homo sapiens GN=C1QA PE=1 SV=2	C1QA_HUMAN	Complement	26	9.45	Homo sapiens	0.00351149	0.00607445	0.00597245	0.00140692	0.00243128	0.00165017	0	0.00208229	0.00213737	0.00109676	0	0	0	0.000498666	0
81	Complement C1q subcomponent subunit B OS=Homo sapiens GN=C1QB PE=1 SV=3	C1QB_HUMAN	Complement	27	8.87	Homo sapiens	0.00449081	0.00640038	0.00212081	0.0057135	0.00380491	0	0.000701836	0.0014741	0.00233092	0.00329539	0.00363805	0.00369889	0.00362149	0.00293375	0
51	Complement C1q subcomponent subunit C OS=Homo sapiens GN=C1QC PE=1 SV=3	C1QC_HUMAN	Complement	26	8.58	Homo sapiens	0.00526724	0.00973464	0.0104756	0.00805189	0.00637764	0.0081435	0.0054123	0.00523122	0.00536481	0.00494467	0.00714435	0.003904	0.0083662	0.00533153	0
96	Complement C1r subcomponent OS=Homo sapiens GN=C1R PE=1 SV=2	C1R_HUMAN	Complement	80	6.14	Homo sapiens	0	0	0	0	0.000989263	0	0	0	0	0.000493283	0.00191263	0.00148496	0.00162967	0.00173008	0
64	Complement C1s subcomponent OS=Homo sapiens GN=C1S PE=1 SV=1	C1S_HUMAN	Complement	77	4.59	Homo sapiens	0	0	0	0	0	0	0	0	0	0	0.00623434	0.00386982	0.00338934	0.00403252	0
263	Complement factor B OS=Homo sapiens GN=CFB PE=1 SV=2	CFAB_HUMAN	Complement	86	7.07	Homo sapiens	0	0	0	0	0.000182784	0	0	0	0	0	0	0	0	0	0
15	Complement factor H OS=Homo sapiens GN=CFH PE=1 SV=4	CFAH_HUMAN	Complement	139	6.59	Homo sapiens	0.0025152	0.00442445	0.00447761	0.00386462	0.00255833	0.00941294	0.0048266	0.00402419	0.00231346	0.0035641	0.00730152	0.00481194	0.00663874	0.00537121	0.00336468
3	Complement C3 OS=Homo sapiens GN=C3 PE=1 SV=2	CO3_HUMAN	Complement	187	6.34	Homo sapiens	0.00627134	0.0103023	0.00731545	0.00627408	0.00739542	0.00518599	0.00409411	0.00779223	0.0036346	0.00565178	0.0277771	0.0168113	0.0213185	0.0107292	0.0152273
10	Complement C4-A OS=Homo sapiens GN=C4A PE=1 SV=2	CO4A_HUMAN	Complement	193	7.08	Homo sapiens	0.00314811	0.00433894	0.0027299	0.00349025	0.00421796	0.00252338	0.00173925	0.0014119	0.00268927	0.00338076	0.0169592	0.0102119	0.0129401	0.0102967	0.0121391
158	Complement C4-B OS=Homo sapiens GN=C4B PE=1 SV=2	CO4B_HUMAN	Complement	193	7.28	Homo sapiens	0	0	0	0	0	0	0	0	0	0	0	0.0103371	0	0.010637	0
47	Complement C5 OS=Homo sapiens GN=C5 PE=1 SV=4	CO5_HUMAN	Complement	188	6.49	Homo sapiens	0	0.000172592	0	0.000191792	0.000420285	0	0.000247438	0	7.14719e-05	0	0.00261298	0.00201577	0.00306779	0.00189452	0
259	Complement component C6 OS=Homo sapiens GN=C6 PE=1 SV=3	CO6_HUMAN	Complement	105	6.74	Homo sapiens	0	0	0	0	0	0	0	0	0	0	0	0	0.000211357	0	0
107	Complement component C8 alpha chain OS=Homo sapiens GN=C8A PE=1 SV=2	CO8A_HUMAN	Complement	65	6.41	Homo sapiens	0	0	0	0	0.000485109	0	0	0	0	0	0.00285393	0.00236112	0.000334293	0.00173039	0
126	Complement component C8 beta chain OS=Homo sapiens GN=C8B PE=1 SV=3	CO8B_HUMAN	Complement	67	8.17	Homo sapiens	0	0	0	0	0	0	0	0	0	0	0.000977386	0.0020312	0.00145941	0.00157777	0
132	Complement component C8 gamma chain OS=Homo sapiens GN=C8G PE=1 SV=3	CO8G_HUMAN	Complement	22	8.48	Homo sapiens	0	0	0	0	0	0.0019502	0	0	0	0	0.00496906	0.00312908	0.0044551	0.00299836	0
79	Complement component C9 OS=Homo sapiens GN=C9 PE=1 SV=2	CO9_HUMAN	Complement	63	5.27	Homo sapiens	0	0	0	0	0	0	0	0	0	0	0.00554707	0.00412892	0.00397375	0.00114879	0.00416311
104	Complement factor H-related protein 1 OS=Homo sapiens GN=CFHR1 PE=1 SV=2	FHR1_HUMAN	Complement	38	7.42	Homo sapiens	0.00319084	0.00457084	0	0	0.00165958	0.00500733	0.00243396	0	0	0.00416368	0.00402009	0	0	0	0
115	Ig heavy chain V-I region V35 OS=Homo sapiens PE=1 SV=1	HV103_HUMAN	Immunoglobulins	13	9.87	Homo sapiens	0	0	0	0.00911181	0	0	0	0.0021284	0.00545715	0.00375324	0	0	0	0.000997331	0
98	Ig heavy chain V-II region ARH-77 OS=Homo sapiens PE=4 SV=1	HV209_HUMAN	Immunoglobulins	16	8.45	Homo sapiens	0.00570617	0.00592192	0	0.00568098	0.00393859	0	0.00524491	0.00345469	0.00479553	0.00364359	0	0	0	0	0
58	Ig heavy chain V-III region TRO OS=Homo sapiens PE=1 SV=1	HV301_HUMAN	Immunoglobulins	13	10	Homo sapiens	0.00706513	0	0	0.0119185	0.010328	0	0.0150952	0.00510265	0.0161234	0.023467	0	0.00368815	0	0.00252589	0
112	Ig heavy chain V-III region WEA OS=Homo sapiens PE=1 SV=1	HV302_HUMAN	Immunoglobulins	12	8.7	Homo sapiens	0	0	0	0.00375271	0	0	0	0	0.0116626	0	0	0	0	0	0
77	Ig heavy chain V-III region 23 OS=Homo sapiens GN=IGHV3-23 PE=1 SV=2	HV303_HUMAN	Immunoglobulins	13	8.46	Homo sapiens	0.0103728	0.0181216	0.0134131	0.0195702	0.0115425	0.014707	0.0194042	0.00931578	0.0161234	0.0159375	0.0108978	0.00322132	0	0.0101536	0
145	Ig heavy chain V-III region BUT OS=Homo sapiens PE=1 SV=1	HV306_HUMAN	Immunoglobulins	12	9.48	Homo sapiens	0	0	0	0	0.00789831	0	0.0155299	0	0	0.0106783	0	0	0	0	0
118	Ig heavy chain V-III region CAM OS=Homo sapiens PE=1 SV=1	HV307_HUMAN	Immunoglobulins	14	6.5	unknown	0	0	0	0	0	0	0.00338385	0	0.0041409	0	0	0	0	0.00285433	0
125	Ig heavy chain V-III region GA OS=Homo sapiens PE=1 SV=1	HV308_HUMAN	Immunoglobulins	13	10.02	Homo sapiens	0	0.00243225	0	0	0.00120919	0	0.00145766	0	0	0.00152726	0	0	0	0	0
61	Ig heavy chain V-III region TUR OS=Homo sapiens PE=1 SV=1	HV318_HUMAN	Immunoglobulins	12	10.12	Homo sapiens	0	0	0	0.0136469	0.00658344	0	0.0154348	0.0103627	0.0122522	0	0	0.00674151	0	0.00220791	0
74	Ig heavy chain V-III region GAL OS=Homo sapiens PE=1 SV=1	HV320_HUMAN	Immunoglobulins	13	8.7	Homo sapiens	0.00938683	0.00853649	0.00900635	0.0125983	0.00608156	0	0.0129416	0.00837771	0.0113319	0.0121383	0	0.00635207	0	0.00661915	0
191	Isocitrate dehydrogenase [NADP], mitochondrial OS=Homo sapiens GN=IDH2 PE=1 SV=2	IDHP_HUMAN	Immunoglobulins	51	8.95	Homo sapiens	0	0	0.00074852	0	0	0	0	0	0	0	0	0	0	0.000262606	0
39	Ig alpha-1 chain C region OS=Homo sapiens GN=IGHA1 PE=1 SV=2	IGHA1_HUMAN	Immunoglobulins	38	6.49	Homo sapiens	0.00478777	0.00663734	0.00616224	0.00503516	0.00686005	0.0061364	0.00514288	0.00427585	0.0047672	0.00440272	0.00575365	0.0077479	0.00773169	0.00625342	0.00665585
101	Ig alpha-2 chain C region OS=Homo sapiens GN=IGHA2 PE=1 SV=3	IGHA2_HUMAN	Immunoglobulins	37	6.02	Homo sapiens	0	0	0.00206349	0.00615283	0	0	0	0	0.00562717	0	0	0.00212215	0	0.00301896	0
2	Ig gamma-1 chain C region OS=Homo sapiens GN=IGHG1 PE=1 SV=1	IGHG1_HUMAN	Immunoglobulins	36	8.31	Homo sapiens	0.0721767	0.0762075	0.0824366	0.081613	0.0845	0.119219	0.0897891	0.0924341	0.0860366	0.0941207	0.0336194	0.0464316	0.032587	0.0702498	0.0423178
11	Ig gamma-2 chain C region OS=Homo sapiens GN=IGHG2 PE=1 SV=2	IGHG2_HUMAN	Immunoglobulins	36	7.66	Homo sapiens	0.054136	0.0682942	0.0460949	0.0487566	0.0482819	0.075159	0.0750375	0.056458	0.0581686	0.0476679	0.0160562	0.0212536	0.0274758	0.0343009	0.00437034
56	Ig gamma-3 chain C region OS=Homo sapiens GN=IGHG3 PE=1 SV=2	IGHG3_HUMAN	Immunoglobulins	41	7.95	Homo sapiens	0.0437759	0.0557823	0.0504684	0.0325861	0.0352671	0.0603846	0.0624776	0.0498826	0.0312387	0.0370611	0.0194213	0.0203659	0.0262111	0.0219017	0
119	Ig gamma-4 chain C region OS=Homo sapiens GN=IGHG4 PE=1 SV=1	IGHG4_HUMAN	Immunoglobulins	36	7.41	Homo sapiens	0	0	0	0.0152142	0	0	0.0346692	0	0.0151131	0	0	0.0134917	0.0108838	0.0161403	0
8	Ig mu chain C region OS=Homo sapiens GN=IGHM PE=1 SV=3	IGHM_HUMAN	Immunoglobulins	49	6.77	Homo sapiens	0.0450334	0.0405906	0.0421552	0.045298	0.0225802	0.0552891	0.0234233	0.0381505	0.0349585	0.0266199	0.0262649	0.0169327	0.0159783	0.0198028	0.0227851
53	Immunoglobulin J chain OS=Homo sapiens GN=IGJ PE=1 SV=4	IGJ_HUMAN	Immunoglobulins	18	4.87	Homo sapiens	0.0135156	0.0105509	0.0118777	0.00908513	0.00658706	0.0117628	0.00571358	0.00829326	0.00815823	0.00933466	0.0078981	0.00534581	0	0.00658907	0
5	Ig kappa chain C region OS=Homo sapiens GN=IGKC PE=1 SV=1	IGKC_HUMAN	Immunoglobulins	12	5.68	Homo sapiens	0.1228	0.110508	0.110407	0.142573	0.150165	0.174462	0.170815	0.187515	0.15239	0.161533	0.0527546	0.105394	0.0461547	0.0896769	0.0141744
21	Immunoglobulin lambda-like polypeptide 5 OS=Homo sapiens GN=IGLL5 PE=2 SV=2	IGLL5_HUMAN	Immunoglobulins	23	9.05	Homo sapiens	0.017829	0.0288192	0.0271136	0.0265012	0.0268052	0.0247908	0.0292077	0.0338139	0.0227947	0.0296142	0.00995434	0.0144448	0.0118092	0.0163403	0
160	Ig kappa chain V-I region DEE OS=Homo sapiens PE=1 SV=1	KV105_HUMAN	Immunoglobulins	12	8.46	Homo sapiens	0	0	0	0	0.00132342	0	0	0	0.00397851	0	0	0	0	0	0
76	Ig kappa chain V-I region EU OS=Homo sapiens PE=1 SV=1	KV106_HUMAN	Immunoglobulins	12	8.46	unknown	0.00760823	0.0157918	0.00975688	0.00912445	0.0138327	0.00700748	0.0124469	0.00331672	0.0062477	0.0140123	0	0.00171716	0	0.00439873	0
220	Ig kappa chain V-I region Scw OS=Homo sapiens PE=1 SV=1	KV117_HUMAN	Immunoglobulins	12	8.85	unknown	0	0	0	0.00525379	0	0	0.00603132	0	0	0	0	0	0	0	0
207	Ig kappa chain V-II region TEW OS=Homo sapiens PE=1 SV=1	KV204_HUMAN	Immunoglobulins	12	8.85	Homo sapiens	0	0	0	0	0	0	0	0	0.00306799	0	0	0	0	0	0
89	Ig kappa chain V-II region RPMI 6410 OS=Homo sapiens PE=4 SV=1	KV206_HUMAN	Immunoglobulins	15	9.53	Homo sapiens	0	0.00409123	0.00636596	0.00667861	0.00158811	0	0.00430275	0	0.00744066	0.00403065	0	0	0	0	0
131	Ig kappa chain V-III region B6 OS=Homo sapiens PE=1 SV=1	KV301_HUMAN	Immunoglobulins	12	9.53	Homo sapiens	0	0	0	0	0.00196493	0	0.00150783	0	0.00223945	0.00408066	0	0	0	0	0
151	Ig kappa chain V-III region NG9 (Fragment) OS=Homo sapiens PE=2 SV=1	KV303_HUMAN	Immunoglobulins	11	9.53	unknown	0	0	0	0.00409386	0.00287502	0	0.00164491	0	0.0030538	0	0	0	0	0	0
222	Ig kappa chain V-III region GOL OS=Homo sapiens PE=1 SV=1	KV307_HUMAN	Immunoglobulins	12	9.53	unknown	0	0	0	0	0	0	0.0094511	0	0	0	0	0	0	0	0
111	Ig kappa chain V-III region CLL OS=Homo sapiens PE=4 SV=2	KV308_HUMAN	Immunoglobulins	14	8.7	unknown	0.00214769	0.00450939	0	0.00520591	0.0067642	0	0.00396895	0.00197185	0.00502129	0.00915281	0	0	0	0.00188273	0
105	Ig kappa chain V-III region VG (Fragment) OS=Homo sapiens PE=1 SV=1	KV309_HUMAN	Immunoglobulins	13	4.59	Homo sapiens	0	0	0	0.00208199	0	0	0	0	0.00645486	0.00229089	0	0.00238006	0	0.00202755	0
185	Ig kappa chain V-III region IARC/BL41 OS=Homo sapiens PE=4 SV=1	KV311_HUMAN	Immunoglobulins	14	4.59	unknown	0	0	0	0.00132399	0	0	0	0	0.00157782	0	0	0	0	0	0
50	Ig kappa chain V-III region HAH OS=Homo sapiens PE=2 SV=1	KV312_HUMAN	Immunoglobulins	14	4.59	Homo sapiens	0.00322153	0.00792674	0.00273055	0.0188365	0.0124165	0.0135951	0.0199823	0.010701	0.0179814	0.0148293	0	0.00503063	0.00460654	0.00713841	0
94	Ig kappa chain V-IV region (Fragment) OS=Homo sapiens GN=IGKV4-1 PE=4 SV=1	KV401_HUMAN	Immunoglobulins	13	4.85	Homo sapiens	0.00938683	0.0109328	0	0.00558625	0.00547433	0.00646844	0.00930296	0.00731352	0.00545715	0.00760791	0	0.00529536	0	0.00202755	0
26	Ig lambda-2 chain C regions OS=Homo sapiens GN=IGLC2 PE=1 SV=1	LAC2_HUMAN	Immunoglobulins	11	7.34	Homo sapiens	0.0691221	0.0817501	0.0850395	0.0603536	0.0610605	0.0998485	0.0762896	0.0892488	0.0559596	0.069134	0.0516458	0.0372257	0.0513382	0.0262	0.0740996
124	Ig lambda chain V-I region WAH OS=Homo sapiens PE=1 SV=1	LV106_HUMAN	Immunoglobulins	12	6.46	unknown	0	0.00526096	0	0.00304832	0.00131772	0	0.00315431	0.00221115	0.00520571	0.00158421	0	0.0011373	0	0	0
122	Ig lambda chain V-III region SH OS=Homo sapiens PE=1 SV=1	LV301_HUMAN	Immunoglobulins	11	6.5	Homo sapiens	0.00428079	0.00582423	0	0.00163754	0.00287502	0	0.00336329	0.00869197	0	0.00345647	0	0	0	0	0
113	Ig lambda chain V-III region LOI OS=Homo sapiens PE=1 SV=1	LV302_HUMAN	Immunoglobulins	12	4.72	Homo sapiens	0	0.0105653	0	0.00375658	0.00394151	0	0.0101139	0.00230049	0.00167959	0.00991108	0	0.00200974	0	0.00273674	0
28	Apolipoprotein(a) OS=Homo sapiens GN=LPA PE=1 SV=1	APOA_HUMAN	Lipoproteins	501	5.77	Homo sapiens	0.000122675	0.00261628	0.000467342	0.00123414	0.000535962	0	0.000856375	0.000408164	0.000919916	0.000551164	0	0.000151114	0.00110643	0.00180558	0
34	Apolipoprotein A-I OS=Homo sapiens GN=APOA1 PE=1 SV=1	APOA1_HUMAN	Lipoproteins	31	5.5	Homo sapiens	0.00738786	0.00558788	0.006281	0.00410418	0.00356749	0.00132856	0	0.00483273	0.00270688	0	0.0207663	0.0141481	0.0287233	0.0136172	0.0207152
123	Apolipoprotein A-II OS=Homo sapiens GN=APOA2 PE=1 SV=1	APOA2_HUMAN	Lipoproteins	11	6.6	Homo sapiens	0.00285386	0	0	0	0.00359464	0	0	0	0	0	0.00490929	0.00889216	0.00592608	0.0066117	0
66	Apolipoprotein A-IV OS=Homo sapiens GN=APOA4 PE=1 SV=3	APOA4_HUMAN	Lipoproteins	45	5.05	Homo sapiens	0	0	0	0	0	0	0	0	0	0	0.0140537	0.00543251	0.00724298	0.00263249	0.00127636
1	Apolipoprotein B-100 OS=Homo sapiens GN=APOB PE=1 SV=2	APOB_HUMAN	Lipoproteins	516	7.04	Homo sapiens	0.00503904	0.00621685	0.005399	0.00715502	0.00633999	0.00430024	0.00507719	0.00446819	0.00524484	0.00515747	0.00281177	0.00520091	0.0127424	0.0119213	0.00318886
130	Apolipoprotein C-I OS=Homo sapiens GN=APOC1 PE=1 SV=1	APOC1_HUMAN	Lipoproteins	9	9.17	Homo sapiens	0.00331541	0	0	0	0.00527848	0	0	0	0	0	0	0.00630903	0	0.00291253	0
88	Apolipoprotein C-II OS=Homo sapiens GN=APOC2 PE=1 SV=1	APOC2_HUMAN	Lipoproteins	11	4.36	Homo sapiens	0.00692277	0	0.0106439	0	0.00646854	0	0	0	0	0	0.0119063	0.0064067	0.0148152	0.0113975	0.0132512
52	Apolipoprotein C-III OS=Homo sapiens GN=APOC3 PE=1 SV=1	APOC3_HUMAN	Lipoproteins	11	5.04	Homo sapiens	0.0110831	0.00287448	0.0141167	0.00416797	0.00646543	0	0	0	0.00133876	0	0.0159138	0.0384421	0.0285795	0.0156002	0.0294153
186	Apolipoprotein C-IV OS=Homo sapiens GN=APOC4 PE=1 SV=1	APOC4_HUMAN	Lipoproteins	15	9.13	Homo sapiens	0	0	0.00254851	0	0	0	0	0	0	0	0	0	0	0.00175721	0
16	Apolipoprotein D OS=Homo sapiens GN=APOD PE=1 SV=1	APOD_HUMAN	Lipoproteins	21	4.79	Homo sapiens	0.0187426	0.023352	0.0261186	0.0212012	0.0214581	0.0231117	0.0252692	0.0181367	0.0130225	0.0211847	0.0462653	0.0239299	0.0692926	0.0219876	0.109065
41	Apolipoprotein E OS=Homo sapiens GN=APOE PE=1 SV=1	APOE_HUMAN	Lipoproteins	36	5.42	Homo sapiens	0.00634019	0	0.00378323	0.00100072	0.00439033	0	0	0	0.00174819	0	0.0139468	0.0119364	0.0211447	0.014484	0.0153994
208	Apolipoprotein F OS=Homo sapiens GN=APOF PE=1 SV=2	APOF_HUMAN	Lipoproteins	35	5.36	Homo sapiens	0	0	0	0	0	0	0	0	0	0	0	0.000448684	0.000620829	0.000573981	0
82	Apolipoprotein M OS=Homo sapiens GN=APOM PE=1 SV=2	APOM_HUMAN	Lipoproteins	21	5.92	Homo sapiens	0.00142089	0	0	0	0.00112947	0	0	0	0	0	0.00831906	0.00696105	0.010325	0.00755066	0
7	Serum albumin OS=Homo sapiens GN=ALB PE=1 SV=2	ALBU_HUMAN	Others	69	6.21	Homo sapiens	0.0273541	0.0194351	0.0286235	0.0202992	0.024971	0.0122392	0.0129671	0.0266855	0.0123503	0.0194759	0.0272017	0.0227248	0.0162281	0.0185506	0.026248
62	Protein AMBP OS=Homo sapiens GN=AMBP PE=1 SV=1	AMBP_HUMAN	Others	39	6.15	Homo sapiens	0	0	0	0	0	0	0.000484672	0	0	0	0.0106271	0.0061771	0.00416676	0.0120019	0
29	CD5 antigen-like OS=Homo sapiens GN=CD5L PE=1 SV=1	CD5L_HUMAN	Others	38	5.15	Homo sapiens	0.0148317	0.0149838	0.0154056	0.0110184	0.00935998	0.0183441	0.00932095	0.0132655	0.013082	0.0101385	0.0106008	0.00602991	0.00344309	0.007982	0.0160712
156	CD9 antigen OS=Homo sapiens GN=CD9 PE=1 SV=4	CD9_HUMAN	Others	25	7.19	Homo sapiens	0	0	0	0.00146319	0.00126402	0	0	0	0.00108921	0	0	0	0	0	0
152	Hemoglobin subunit alpha OS=Homo sapiens GN=HBA1 PE=1 SV=2	HBA_HUMAN	Others	15	9.09	Homo sapiens	0	0	0	0.00185358	0.00317165	0	0	0	0	0	0	0	0	0	0
117	Hemoglobin subunit beta OS=Homo sapiens GN=HBB PE=1 SV=2	HBB_HUMAN	Others	16	7.32	Homo sapiens	0	0	0	0.00568195	0.00494126	0	0	0	0	0.00251916	0	0.00397532	0.00138703	0.00455009	0
31	Serotransferrin OS=Homo sapiens GN=TF PE=1 SV=3	TRFE_HUMAN	Others	77	7.13	Homo sapiens	0.0067151	0.00204504	0.0116517	0.00437495	0.00523392	0.00683738	0.00206221	0.00619628	0.00263115	0.00616829	0.00694767	0.00626597	0	0.00283453	0.00299752
55	Actin, cytoplasmic 2 OS=Homo sapiens GN=ACTG1 PE=1 SV=1	ACTG_HUMAN	Tissue Linkage	42	5.16	Homo sapiens	0.00796345	0.00225597	0	0.00390022	0.00282273	0	0	0.00582922	0.00233746	0.00282462	0	0.00434291	0.00102367	0.00439782	0.00402344
176	Alpha-actinin-1 OS=Homo sapiens GN=ACTN1 PE=1 SV=2	ACTN1_HUMAN	Tissue Linkage	103	5.07	Homo sapiens	0	0	0	0	0	0	0	0	0	0	0	0.000668347	0	0.000768379	0
183	Gelsolin OS=Homo sapiens GN=GSN PE=1 SV=1	GELS_HUMAN	Tissue Linkage	86	6.19	Homo sapiens	0	0	0	0	0	0	0	0	0	0	0.000257956	0	0.00138695	0.000387637	0
14	Keratin, type I cytoskeletal 10 OS=Homo sapiens GN=KRT10 PE=1 SV=6	K1C10_HUMAN	Tissue Linkage	59	4.88	Homo sapiens	0.0177916	0.0187513	0.021139	0.0121818	0.0100455	0.0243988	0.0105625	0.0157492	0.0141366	0.0156027	0.0103405	0.00664804	0.00570845	0.00749044	0.0223207
45	Keratin, type I cytoskeletal 14 OS=Homo sapiens GN=KRT14 PE=1 SV=4	K1C14_HUMAN	Tissue Linkage	52	4.81	Homo sapiens	0.011121	0.013961	0.0206544	0.0108497	0.00957225	0.0113922	0.00663657	0.00891829	0.0162933	0.00759979	0.00312026	0.00320832	0	0.00443289	0.0152796
24	Keratin, type I cytoskeletal 16 OS=Homo sapiens GN=KRT16 PE=1 SV=4	K1C16_HUMAN	Tissue Linkage	51	4.69	Homo sapiens	0.0116491	0.0155072	0.0217844	0.0116025	0.0150311	0.013685	0.00803315	0.0109358	0.0211283	0.00871724	0.00277379	0.00213587	0	0.00323478	0.0102853
80	Keratin, type I cytoskeletal 17 OS=Homo sapiens GN=KRT17 PE=1 SV=2	K1C17_HUMAN	Tissue Linkage	48	4.67	Homo sapiens	0.00855688	0.00952214	0.0113736	0.00682378	0.00658427	0.00793049	0.00269764	0.00540127	0.00961134	0.0078257	0	0	0	0	0
12	Keratin, type I cytoskeletal 9 OS=Homo sapiens GN=KRT9 PE=1 SV=3	K1C9_HUMAN	Tissue Linkage	62	4.89	Homo sapiens	0.0230635	0.0239209	0.0253558	0.0162982	0.0161864	0.0194685	0.0127715	0.0196039	0.0189198	0.0183223	0.0119675	0.00607916	0.00981681	0.00840787	0.0276796
177	Keratin, type I cuticular Ha1 OS=Homo sapiens GN=KRT31 PE=1 SV=3	K1H1_HUMAN	Tissue Linkage	47	4.53	unknown	0	0.00570274	0	0	0	0	0	0.00288112	0	0	0	0	0	0	0
25	Keratin, type II cytoskeletal 2 epidermal OS=Homo sapiens GN=KRT2 PE=1 SV=2	K22E_HUMAN	Tissue Linkage	65	8.17	Homo sapiens	0.0180337	0.0162788	0.0177199	0.0103598	0.0100904	0.0198256	0.00973953	0.0173915	0.0086278	0.0138699	0.00554323	0.00360571	0.00251075	0.00345756	0.0230974
6	Keratin, type II cytoskeletal 1 OS=Homo sapiens GN=KRT1 PE=1 SV=6	K2C1_HUMAN	Tissue Linkage	66	8.33	Homo sapiens	0.0382572	0.0353776	0.0387383	0.0263221	0.0214348	0.0346164	0.019352	0.0326479	0.0257108	0.0272522	0.0134102	0.00954489	0.0121708	0.0125133	0.0337739
44	Keratin, type II cytoskeletal 5 OS=Homo sapiens GN=KRT5 PE=1 SV=3	K2C5_HUMAN	Tissue Linkage	62	7.91	Homo sapiens	0.0100441	0.00942356	0.0126239	0.00645498	0.00777535	0.00852017	0.00585224	0.00724808	0.00971447	0.0074937	0.00421622	0.00191608	0.00280374	0.00276432	0.0128595
22	Keratin, type II cytoskeletal 6A OS=Homo sapiens GN=KRT6A PE=1 SV=3	K2C6A_HUMAN	Tissue Linkage	60	8.16	Homo sapiens	0.00987966	0.00999427	0.0185603	0.00970846	0.0123792	0.0094906	0.00761734	0.0108989	0.013749	0.01023	0.00399592	0.000981373	0.00146405	0.00340973	0.0107945
201	Keratin, type II cytoskeletal 6B OS=Homo sapiens GN=KRT6B PE=1 SV=5	K2C6B_HUMAN	Tissue Linkage	60	8.16	unknown	0	0	0	0	0.00395316	0	0	0	0.00897073	0	0	0	0	0	0
144	Keratin, type II cytoskeletal 6C OS=Homo sapiens GN=KRT6C PE=1 SV=3	K2C6C_HUMAN	Tissue Linkage	60	8.16	Homo sapiens	0	0	0.0192179	0.00686076	0.0123792	0	0.00252029	0	0.00908568	0	0	0	0	0	0
215	Keratin, type II cuticular Hb4 OS=Homo sapiens GN=KRT84 PE=2 SV=2	KRT84_HUMAN	Tissue Linkage	65	7.61	unknown	0	0	0	0	0	0	0	0.00294141	0	0	0	0	0	0	0
135	Keratin, type II cuticular Hb5 OS=Homo sapiens GN=KRT85 PE=1 SV=1	KRT85_HUMAN	Tissue Linkage	56	6.49	unknown	0	0.00589879	0	0	0	0.000735451	0	0.00365105	0	0	0	0	0	0	0
172	Keratin, type II cuticular Hb6 OS=Homo sapiens GN=KRT86 PE=1 SV=1	KRT86_HUMAN	Tissue Linkage	53	5.35	unknown	0	0.0036186	0	0	0	0	0	0.00409911	0	0	0	0	0	0	0
153	14-3-3 protein zeta/delta OS=Homo sapiens GN=YWHAZ PE=1 SV=1	1433Z_HUMAN		28	4.43	Homo sapiens	0	0	0	0	0	0	0	0	0	0	0	0.00283406	0	0.00307577	0.00205129
168	HLA class I histocompatibility antigen, A-11 alpha chain OS=Homo sapiens GN=HLA-A PE=1 SV=1	1A11_HUMAN		41	6.06	unknown	0	0	0	0	0.00481964	0	0	0	0.00271082	0	0	0	0	0	0
90	HLA class I histocompatibility antigen, B-7 alpha chain OS=Homo sapiens GN=HLA-B PE=1 SV=3	1B07_HUMAN		40	5.65	unknown	0.00265831	0.00200725	0.00292706	0.00113888	0.00612515	0.00102963	0	0	0.00155279	0.005691	0	0	0	0.000999014	0
238	HLA class I histocompatibility antigen, B-40 alpha chain OS=Homo sapiens GN=HLA-B PE=1 SV=1	1B40_HUMAN		41	6.51	unknown	0	0	0	0	0.00617171	0	0	0	0	0	0	0	0	0	0
193	HLA class I histocompatibility antigen, B-56 alpha chain OS=Homo sapiens GN=HLA-B PE=1 SV=1	1B56_HUMAN		40	6.06	unknown	0	0	0	0.00160344	0.00553163	0	0	0	0.00192815	0	0	0	0	0	0
170	Amyloid beta A4 protein OS=Homo sapiens GN=APP PE=1 SV=3	A4_HUMAN		87	4.45	Homo sapiens	0	0	0	0	0	0	0	0	0	0	0	0.000652658	0	0.000683692	0.00201827
218	Disintegrin and metalloproteinase domain-containing protein 10 OS=Homo sapiens GN=ADAM10 PE=1 SV=1	ADA10_HUMAN		84	7.81	Homo sapiens	0	0	0	0	0.000377306	0	0	0	0	0	0	0	0	0	0
217	Angiotensinogen OS=Homo sapiens GN=AGT PE=1 SV=1	ANGT_HUMAN		53	6.27	Homo sapiens	0	0	0	0	0	0	0	0	0	0	0.00143748	0	0.000418726	0.000252696	0
216	Amine oxidase [flavin-containing] B OS=Homo sapiens GN=MAOB PE=1 SV=3	AOFB_HUMAN		59	7.55	unknown	0	0	0	0.000925301	0.000266431	0	0	0	0.000227741	0	0	0	0	0	0
40	Beta-2-glycoprotein 1 OS=Homo sapiens GN=APOH PE=1 SV=3	APOH_HUMAN		38	8.03	Homo sapiens	0.00679474	0.0062213	0.00713456	0.00598444	0.0174631	0.00778336	0.0127185	0.00571635	0.00421044	0.0192588	0	0.00167618	0	0.00121848	0
182	ATP synthase subunit alpha, mitochondrial OS=Homo sapiens GN=ATP5A1 PE=1 SV=1	ATPA_HUMAN		60	9.56	Homo sapiens	0	0	0	0	0.00026199	0	0	0	0	0.000340868	0	0	0	0	0
141	ATP synthase subunit beta, mitochondrial OS=Homo sapiens GN=ATP5B PE=1 SV=3	ATPB_HUMAN		57	5.07	Homo sapiens	0	0	0	0.000632578	0.00110557	0	0.000332448	0.00215286	0.000736081	0.000333519	0	0	0	0	0
235	Beta-2-microglobulin OS=Homo sapiens GN=B2M PE=1 SV=1	B2MG_HUMAN		14	6.51	Homo sapiens	0	0	0	0	0.00169421	0	0	0	0	0	0	0	0	0	0
174	Band 3 anion transport protein OS=Homo sapiens GN=SLC4A1 PE=1 SV=3	B3AT_HUMAN		102	4.84	Homo sapiens	0	0.000618936	0	0.000535223	0	0	0	0	0.000617009	0	0	0	0	0	0
243	Barrier-to-autointegration factor OS=Homo sapiens GN=BANF1 PE=1 SV=1	BAF_HUMAN		10	5.88	unknown	0	0	0	0	0	0	0	0	0	0.00489679	0	0	0	0	0
9	C4b-binding protein alpha chain OS=Homo sapiens GN=C4BPA PE=1 SV=2	C4BPA_HUMAN		67	7.31	Homo sapiens	0.0149464	0.0157649	0.009059	0.0162918	0.00577978	0.00694786	0.00194611	0.00467762	0.010235	0.0041025	0.0398818	0.0323008	0.0358158	0.029651	0.0799979
71	C4b-binding protein beta chain OS=Homo sapiens GN=C4BPB PE=1 SV=1	C4BPB_HUMAN		28	4.8	Homo sapiens	0	0.00228809	0	0	0	0	0	0	0	0	0.00972323	0.00792466	0.00700086	0.00826045	0.0105304
157	Calmodulin-like protein 5 OS=Homo sapiens GN=CALML5 PE=1 SV=2	CALL5_HUMAN		16	4.05	Homo sapiens	0.00855926	0	0	0	0	0	0	0	0	0	0	0	0	0	0
179	Calreticulin OS=Homo sapiens GN=CALR PE=1 SV=1	CALR_HUMAN		48	4.04	Homo sapiens	0	0	0	0	0	0	0	0	0	0	0	0.00157726	0	0.00109968	0
242	Cathelicidin antimicrobial peptide OS=Homo sapiens GN=CAMP PE=1 SV=1	CAMP_HUMAN		19	10.03	Homo sapiens	0	0	0	0	0.00207325	0	0	0	0	0	0	0	0	0	0
247	Caspase-14 OS=Homo sapiens GN=CASP14 PE=1 SV=2	CASPE_HUMAN		28	5.28	unknown	0.00213951	0	0	0	0	0	0	0	0	0	0	0	0	0	0
194	Leukocyte surface antigen CD47 OS=Homo sapiens GN=CD47 PE=1 SV=1	CD47_HUMAN		35	7.27	Homo sapiens	0	0	0	0	0	0	0	0	0.000394102	0	0	0	0	0	0
46	Ceruloplasmin OS=Homo sapiens GN=CP PE=1 SV=1	CERU_HUMAN		122	5.5	Homo sapiens	0	0	0	0	0.000128848	0	0	0	0	0	0.00438618	0.00373948	0.00685708	0.00335089	0
245	10 kDa heat shock protein, mitochondrial OS=Homo sapiens GN=HSPE1 PE=1 SV=2	CH10_HUMAN		11	9.49	unknown	0	0	0	0	0.00142904	0	0	0	0	0	0	0	0	0	0
262	60 kDa heat shock protein, mitochondrial OS=Homo sapiens GN=HSPD1 PE=1 SV=2	CH60_HUMAN		61	5.55	Homo sapiens	0	0	0	0	0	0	0	0.000453593	0	0	0	0	0	0	0
49	Clusterin OS=Homo sapiens GN=CLU PE=1 SV=1	CLUS_HUMAN		52	6.21	Homo sapiens	0	0	0	0	0	0	0	0	0	0	0.00672048	0.00456826	0.0142341	0.00596301	0.0045128
155	Beta-Ala-His dipeptidase OS=Homo sapiens GN=CNDP1 PE=1 SV=4	CNDP1_HUMAN		57	4.95	unknown	0	0	0	0	0	0	0	0	0	0	0	0.000480436	0.00458265	0	0
240	Collectin-10 OS=Homo sapiens GN=COLEC10 PE=2 SV=2	COL10_HUMAN		31	7.39	Homo sapiens	0	0	0	0	0	0	0	0	0	0	0	0.000337719	0.000685978	0	0
211	Collectin-11 OS=Homo sapiens GN=COLEC11 PE=1 SV=1	COL11_HUMAN		29	5.06	Homo sapiens	0	0	0	0	0	0	0	0	0	0	0	0.00130532	0	0.00136571	0
232	Collagen alpha-1(XXI) chain OS=Homo sapiens GN=COL21A1 PE=2 SV=1	COLA1_HUMAN		99	8.48	unknown	0	0	0	0	0	0	0	0.000268018	0	0	0	0	0	0	0
63	Cartilage oligomeric matrix protein OS=Homo sapiens GN=COMP PE=1 SV=2	COMP_HUMAN		83	4.16	Homo sapiens	0	0	0	0	0	0	0	0	0	0	0.00578962	0.00364859	0.00156518	0.00485843	0.00173001
253	Choline transporter-like protein 1 OS=Homo sapiens GN=SLC44A1 PE=1 SV=1	CTL1_HUMAN		73	8.69	unknown	0	0	0	0	0.000215335	0	0	0	0	0	0	0	0	0	0
95	Dermcidin OS=Homo sapiens GN=DCD PE=1 SV=2	DCD_HUMAN		11	6.52	Homo sapiens	0.0165998	0.0143578	0.0142282	0.00826606	0.00431028	0	0.00257757	0.005025	0.00567896	0.00715905	0.00194573	0	0	0.0023962	0
147	Neutrophil defensin 1 OS=Homo sapiens GN=DEFA1 PE=1 SV=1	DEF1_HUMAN		10	7.04	Homo sapiens	0	0	0	0.0018044	0.00315321	0	0.00653968	0	0.00355262	0	0	0	0	0	0
87	Desmoplakin OS=Homo sapiens GN=DSP PE=1 SV=3	DESP_HUMAN		332	6.78	Homo sapiens	9.45555e-05	0	0.000295247	0.000411137	0.000190299	0	0	7.99211e-05	0.000613583	0.000212909	0	0	0	0	0
140	Desmocollin-1 OS=Homo sapiens GN=DSC1 PE=1 SV=2	DSC1_HUMAN		100	5.08	Homo sapiens	0.000313924	0	0.000382277	0.000365488	0.00039541	0	0	0	0.000339486	0	0	0	0	0	0
206	Desmoglein-1 OS=Homo sapiens GN=DSG1 PE=1 SV=2	DSG1_HUMAN		114	4.66	Homo sapiens	0	0	0	0.000560182	0	0	0	0	0.000117866	0	0	0	0	0	0
241	tRNA-dihydrouridine(47) synthase [NAD(P)(+)]-like OS=Homo sapiens GN=DUS3L PE=1 SV=2	DUS3L_HUMAN		72	8.4	unknown	0	0	0	0	0	0	0	0	0.000204533	0	0	0	0	0	0
163	Elongation factor 1-alpha 2 OS=Homo sapiens GN=EEF1A2 PE=1 SV=1	EF1A2_HUMAN		50	9.5	unknown	0	0	0	0	0	0	0	0.00380366	0	0	0	0	0.00043458	0	0.00125866
251	Endonuclease domain-containing 1 protein OS=Homo sapiens GN=ENDOD1 PE=1 SV=2	ENDD1_HUMAN		55	5.38	Homo sapiens	0	0	0	0	0	0	0	0	0.000762847	0	0	0	0	0	0
224	Alpha-enolase OS=Homo sapiens GN=ENO1 PE=1 SV=2	ENOA_HUMAN		47	7.46	Homo sapiens	0	0	0	0	0	0	0	0.00203497	0	0	0	0	0	0	0
225	Fatty acid-binding protein, epidermal OS=Homo sapiens GN=FABP5 PE=1 SV=3	FABP5_HUMAN		15	7.05	Homo sapiens	0.00408208	0	0	0	0	0	0	0	0	0	0	0	0	0	0
213	Fibulin-1 OS=Homo sapiens GN=FBLN1 PE=1 SV=4	FBLN1_HUMAN		77	4.86	Homo sapiens	0	0	0	0	0	0	0	0	0	0	0	0	0.000288214	0.000596661	0
116	Ficolin-2 OS=Homo sapiens GN=FCN2 PE=1 SV=2	FCN2_HUMAN		34	6.77	unknown	0.000923307	0	0	0.00134123	0.00185958	0.003732	0	0	0.00205387	0.00493309	0	0	0	0	0.00940329
69	Ficolin-3 OS=Homo sapiens GN=FCN3 PE=1 SV=2	FCN3_HUMAN		33	6.66	unknown	0	0.00191308	0	0.00193517	0.00191556	0	0	0	0.0038001	0.00210737	0.00330087	0.0034908	0.00756518	0.00619523	0.014206
228	Four and a half LIM domains protein 1 OS=Homo sapiens GN=FHL1 PE=1 SV=4	FHL1_HUMAN		36	9.15	unknown	0	0	0	0	0.00043924	0	0	0	0	0.00273558	0	0	0	0	0
175	Filaggrin OS=Homo sapiens GN=FLG PE=1 SV=3	FILA_HUMAN		435	9.6	Homo sapiens	0.000172013	0	0	0	9.10345e-05	0	0	0	9.6452e-05	0.000112166	0	0	0	0	0
129	Filaggrin-2 OS=Homo sapiens GN=FLG2 PE=1 SV=1	FILA2_HUMAN		248	8.35	Homo sapiens	0.00036814	0.00038206	0.000308073	7.2633e-05	9.56409e-05	0	0	0.000111314	0.00031127	8.0058e-05	0	0	0	0	0
48	Fibronectin OS=Homo sapiens GN=FN1 PE=1 SV=4	FINC_HUMAN		263	5.45	Homo sapiens	0.000119363	0.000360269	0	0.000898917	0.000781236	0	0	0	0.000562583	0.000228749	0.000954187	0.00076534	0.000910577	0.00138025	0
17	Filamin-A OS=Homo sapiens GN=FLNA PE=1 SV=4	FLNA_HUMAN		281	5.95	Homo sapiens	0.00238013	0.002025	0.00201103	0.00249359	0.00371189	0.0018822	0.000532894	0.00184516	0.00241583	0.00249459	0	0.00189447	0	0.00220671	0
154	Glyceraldehyde-3-phosphate dehydrogenase OS=Homo sapiens GN=GAPDH PE=1 SV=3	G3P_HUMAN		36	8.73	Homo sapiens	0	0	0	0.00100158	0.000436651	0	0	0.00529687	0.000782307	0	0	0	0	0	0.0105835
139	Solute carrier family 2, facilitated glucose transporter member 3 OS=Homo sapiens GN=SLC2A3 PE=2 SV=1	GTR3_HUMAN		54	7.24	Homo sapiens	0	0	0.00254487	0.00101098	0.00175668	0	0	0	0.000776974	0.00183153	0	0	0	0	0
234	Histone H2A type 1-C OS=Homo sapiens GN=HIST1H2AC PE=1 SV=3	H2A1C_HUMAN		14	11.66	unknown	0	0	0	0	0	0	0	0.00387164	0	0	0	0	0	0	0
203	Histone H4 OS=Homo sapiens GN=HIST1H4A PE=1 SV=2	H4_HUMAN		11	11.91	unknown	0	0	0	0	0.00143751	0	0	0.00989806	0	0.00180494	0	0	0	0	0
23	Hyaluronan-binding protein 2 OS=Homo sapiens GN=HABP2 PE=1 SV=1	HABP2_HUMAN		63	6.52	Homo sapiens	0	0	0	0	0	0	0	0	0	0	0.0238902	0.0171951	0.0119139	0.0137231	0.0205004
146	Hemopexin OS=Homo sapiens GN=HPX PE=1 SV=2	HEMO_HUMAN		52	7.02	Homo sapiens	0	0	0	0	0	0	0	0	0	0	0.00209954	0.00228456	0	0.00126985	0
83	Heparin cofactor 2 OS=Homo sapiens GN=SERPIND1 PE=1 SV=3	HEP2_HUMAN		57	6.89	Homo sapiens	0	0	0	0	0	0	0	0	0	0	0.00518538	0.00328447	0.00306188	0.0024332	0
38	Hornerin OS=Homo sapiens GN=HRNR PE=1 SV=2	HORN_HUMAN		282	10.24	Homo sapiens	0.00140123	0.00162098	0.00152093	0.0010029	0.00162524	0.000146047	0.00079364	0.0011584	0.00141178	0.00122686	0	0.000122646	7.70533e-05	0.000351872	0
60	Histidine-rich glycoprotein OS=Homo sapiens GN=HRG PE=1 SV=1	HRG_HUMAN		60	7.52	Homo sapiens	0.0017703	0.00130789	0	0	0.00223946	0.000713303	0.000301566	0	0.000568784	0.00261795	0.00290689	0.00281108	0.00580211	0.00528076	0.00233777
120	Heat shock 70 kDa protein 1-like OS=Homo sapiens GN=HSPA1L PE=1 SV=2	HS71L_HUMAN		70	5.82	unknown	0	0.0011159	0	0	0	0	0	0.00409044	0	0	0	0	0.000465622	0	0.00507193
202	Heat shock protein HSP 90-alpha OS=Homo sapiens GN=HSP90AA1 PE=1 SV=5	HS90A_HUMAN		85	4.66	Homo sapiens	0	0	0	0	0	0	0	0	0	0	0	0.00052615	0	0.000152533	0
100	Ig heavy chain V-I region HG3 OS=Homo sapiens PE=3 SV=1	HV102_HUMAN		13	9.4	Homo sapiens	0.0105345	0	0	0.008419	0	0	0	0	0.00418927	0	0	0	0	0	0
244	IQ and AAA domain-containing protein 1-like OS=Homo sapiens GN=IQCA1L PE=3 SV=2	IQCAL_HUMAN		95	9.79	unknown	0	0	0.000830611	0	0	0	0	0	0	0	0	0	0	0	0
37	Inter-alpha-trypsin inhibitor heavy chain H1 OS=Homo sapiens GN=ITIH1 PE=1 SV=3	ITIH1_HUMAN		101	6.78	Homo sapiens	0	0	0	0	0.000156561	0	0	0	0	0	0.00626787	0.00308253	0.00817295	0.00862	0.00291931
33	Inter-alpha-trypsin inhibitor heavy chain H2 OS=Homo sapiens GN=ITIH2 PE=1 SV=2	ITIH2_HUMAN		106	6.85	Homo sapiens	0	0	0	0	0.000222445	0	0	0	0	0	0.00915975	0.00485943	0.00952548	0.00859635	0.00500589
57	Inter-alpha-trypsin inhibitor heavy chain H3 OS=Homo sapiens GN=ITIH3 PE=1 SV=2	ITIH3_HUMAN		100	5.49	Homo sapiens	0	0	0	0	0	0	0	0	0	0	0.00370478	0.00308023	0.00467404	0.00322969	0.00374932
209	Inter-alpha-trypsin inhibitor heavy chain H4 OS=Homo sapiens GN=ITIH4 PE=1 SV=4	ITIH4_HUMAN		103	6.97	Homo sapiens	0	0	0	0	0	0	0	0	0	0	0	0	0.00042192	0.000258644	0
254	Junctional adhesion molecule A OS=Homo sapiens GN=F11R PE=1 SV=1	JAM1_HUMAN		33	8.02	Homo sapiens	0	0	0	0	0.00047917	0	0	0	0	0	0	0	0	0	0
114	Phosphatidylcholine-sterol acyltransferase OS=Homo sapiens GN=LCAT PE=1 SV=1	LCAT_HUMAN		50	6.04	Homo sapiens	0	0	0	0	0	0	0	0	0	0	0.00458394	0.00234416	0.00305596	0.00158141	0
148	Lipocalin-1 OS=Homo sapiens GN=LCN1 PE=1 SV=1	LCN1_HUMAN		19	5.3	unknown	0.00720177	0	0	0.00192525	0	0	0.000997345	0	0	0	0	0	0	0	0
250	L-lactate dehydrogenase A chain OS=Homo sapiens GN=LDHA PE=1 SV=2	LDHA_HUMAN		37	8.45	unknown	0	0	0	0	0	0	0	0.000747815	0	0	0	0	0	0	0
136	Galectin-3-binding protein OS=Homo sapiens GN=LGALS3BP PE=1 SV=1	LG3BP_HUMAN		65	4.9	unknown	0	0.00122085	0	0.00182236	0	0	0	0	0.000748846	0	0.00117811	0.000241599	0.000490738	0.000403274	0
264	Latent-transforming growth factor beta-binding protein 1 OS=Homo sapiens GN=LTBP1 PE=1 SV=4	LTBP1_HUMAN		187	5.85	Homo sapiens	0	0	0	0	8.45595e-05	0	0	0	0	0	0	0	0	0	0
165	Lumican OS=Homo sapiens GN=LUM PE=1 SV=2	LUM_HUMAN		38	6.6	Homo sapiens	0	0	0	0	0	0	0	0	0	0	0.00172329	0.00131467	0.00285297	0.00190829	0
121	Lysozyme C OS=Homo sapiens GN=LYZ PE=1 SV=1	LYSC_HUMAN		17	9.35	Homo sapiens	0.00624813	0.00376862	0	0.00215175	0	0	0.00217903	0.00318841	0.00330686	0.00120306	0	0	0	0	0
150	Mannan-binding lectin serine protease 1 OS=Homo sapiens GN=MASP1 PE=1 SV=3	MASP1_HUMAN		79	5.18	Homo sapiens	0	0	0	0	0	0	0	0	0	0	0.00179957	0.000958333	0.000544232	0.000745674	0
169	Mannan-binding lectin serine protease 2 OS=Homo sapiens GN=MASP2 PE=1 SV=4	MASP2_HUMAN		76	5.37	Homo sapiens	0	0	0	0	0	0	0	0	0	0	0	0.000137754	0.00200135	0.000869802	0
68	Myosin-9 OS=Homo sapiens GN=MYH9 PE=1 SV=4	MYH9_HUMAN		227	5.29	Homo sapiens	0	0	0	0	6.92486e-05	0	0	0	0	0	0	0.00105533	0	0.00291083	0
214	Myosin light polypeptide 6 OS=Homo sapiens GN=MYL6 PE=1 SV=2	MYL6_HUMAN		17	4.29	Homo sapiens	0	0	0	0	0	0	0	0	0	0	0	0.00142391	0	0.00235062	0
142	Prenylcysteine oxidase 1 OS=Homo sapiens GN=PCYOX1 PE=1 SV=3	PCYOX_HUMAN		57	6.1	unknown	0	0	0	0.000949138	0.000830174	0	0.0011323	0	0.000736081	0.000681841	0	0	0	0.000694837	0
256	Aggrecan core protein OS=Homo sapiens GN=ACAN PE=1 SV=2	PGCA_HUMAN		250	3.82	Homo sapiens	0	0	0	0	0	0	0	0	0	0	0	0	0	5.35716e-05	0
143	Phosphatidylinositol-glycan-specific phospholipase D OS=Homo sapiens GN=GPLD1 PE=1 SV=3	PHLD_HUMAN		92	6.33	unknown	0	0	0	0	0	0	0	0	0	0	0.000711792	0.000822917	0.00212314	0.000145575	0
188	Polymeric immunoglobulin receptor OS=Homo sapiens GN=PIGR PE=1 SV=4	PIGR_HUMAN		83	5.43	unknown	0.00036226	0	0	0.000657744	0	0	0	0	0	0	0	0	0	0	0
227	Prolactin-inducible protein OS=Homo sapiens GN=PIP PE=1 SV=1	PIP_HUMAN		17	8.18	unknown	0.0071392	0	0	0	0	0	0	0	0	0	0	0	0	0	0
190	Serine/threonine-protein kinase N3 OS=Homo sapiens GN=PKN3 PE=1 SV=1	PKN3_HUMAN		99	8.56	unknown	0	0	0	0.000181949	0	0	0	0	0	0	0	0	0	0	0
161	Junction plakoglobin OS=Homo sapiens GN=JUP PE=1 SV=3	PLAK_HUMAN		82	6.05	Homo sapiens	0	0	0.000466191	0.000446095	0.000481222	0	0	0	0.000759635	0.000473963	0	0	0	0	0
178	Pleckstrin OS=Homo sapiens GN=PLEK PE=1 SV=3	PLEK_HUMAN		40	8.45	Homo sapiens	0	0	0	0	0.00138182	0	0	0	0.000712997	0.00197621	0	0	0	0	0
42	Serum paraoxonase/arylesterase 1 OS=Homo sapiens GN=PON1 PE=1 SV=3	PON1_HUMAN		40	4.89	Homo sapiens	0	0	0	0.000450325	0.000790013	0	0	0	0	0.00148293	0.0190873	0.0129883	0.0181922	0.0123787	0.0123825
252	Thioredoxin-dependent peroxide reductase, mitochondrial OS=Homo sapiens GN=PRDX3 PE=1 SV=3	PRDX3_HUMAN		28	7.88	Homo sapiens	0	0	0	0	0.000561408	0	0	0	0	0	0	0	0	0	0
97	Vitamin K-dependent protein C OS=Homo sapiens GN=PROC PE=1 SV=1	PROC_HUMAN		52	6.23	Homo sapiens	0	0	0	0	0	0	0	0	0	0	0.00378548	0.00254788	0.00230717	0.00228766	0
72	Properdin OS=Homo sapiens GN=CFP PE=1 SV=2	PROP_HUMAN		51	7.92	Homo sapiens	0.000585073	0.00247679	0	0.00392377	0.00201528	0	0.00237134	0.0013217	0.00260541	0.00114309	0	0.00216352	0	0.00052236	0
236	Ras-related protein Rab-10 OS=Homo sapiens GN=RAB10 PE=1 SV=1	RAB10_HUMAN		23	8.61	Homo sapiens	0	0	0	0	0	0	0	0	0	0	0	0	0	0.000575978	0
219	GTP-binding nuclear protein Ran OS=Homo sapiens GN=RAN PE=1 SV=3	RAN_HUMAN		24	7.59	Homo sapiens	0	0	0	0	0	0	0	0.00453661	0	0	0	0	0	0	0
255	Ras-related protein Rap-1A OS=Homo sapiens GN=RAP1A PE=1 SV=1	RAP1A_HUMAN		21	6.55	unknown	0	0	0	0	0	0	0	0	0	0	0	0.000654155	0	0	0
230	Retinol-binding protein 4 OS=Homo sapiens GN=RBP4 PE=1 SV=3	RET4_HUMAN		23	5.85	Homo sapiens	0	0	0	0	0	0	0	0	0	0	0	0	0.00141711	0	0
173	Resistin OS=Homo sapiens GN=RETN PE=2 SV=1	RETN_HUMAN		11	6.89	Homo sapiens	0.00558728	0	0	0	0	0.00763486	0	0	0.00256028	0.00358751	0	0	0	0	0
261	60S ribosomal protein L12 OS=Homo sapiens GN=RPL12 PE=1 SV=1	RL12_HUMAN		18	10.11	unknown	0	0	0	0	0	0	0	0.00153718	0	0	0	0	0	0	0
233	40S ribosomal protein S13 OS=Homo sapiens GN=RPS13 PE=1 SV=2	RS13_HUMAN		17	11.19	unknown	0	0	0	0	0	0	0	0.00562608	0	0	0	0	0	0	0
246	40S ribosomal protein S9 OS=Homo sapiens GN=RPS9 PE=1 SV=3	RS9_HUMAN		23	11.32	unknown	0	0	0	0	0	0	0	0.00120301	0	0	0	0	0	0	0
195	Protein S100-A7 OS=Homo sapiens GN=S100A7 PE=1 SV=4	S10A7_HUMAN		11	6.78	Homo sapiens	0.0110935	0	0.00717346	0	0	0	0	0	0	0	0	0	0	0	0
199	Protein S100-A8 OS=Homo sapiens GN=S100A8 PE=1 SV=1	S10A8_HUMAN		11	7.07	Homo sapiens	0.00544603	0	0.00717346	0	0	0	0	0	0	0	0	0	0	0	0
204	Protein S100-A9 OS=Homo sapiens GN=S100A9 PE=1 SV=1	S10A9_HUMAN		13	6.07	unknown	0.00229529	0	0	0	0	0	0	0	0	0.00757545	0	0	0	0	0
196	Adenosylhomocysteinase OS=Homo sapiens GN=AHCY PE=1 SV=4	SAHH_HUMAN		48	6.29	unknown	0	0	0	0	0	0	0	0.00284475	0	0	0	0	0	0	0
198	Suprabasin OS=Homo sapiens GN=SBSN PE=1 SV=2	SBSN_HUMAN		61	7.01	Homo sapiens	0.0014967	0	0	0.000295295	0.000259223	0	0	0	0.000220274	0	0	0	0	0	0
205	Selenoprotein P OS=Homo sapiens GN=SEPP1 PE=1 SV=3	SEPP1_HUMAN		43	7.92	Homo sapiens	0	0	0	0	0	0	0	0	0	0	0.0015229	0.000636858	0	0	0
212	Extracellular superoxide dismutase [Cu-Zn] OS=Homo sapiens GN=SOD3 PE=1 SV=2	SODE_HUMAN		26	6.59	Homo sapiens	0	0	0	0	0	0	0	0	0	0	0	0.00139653	0	0.000515111	0
128	Secreted phosphoprotein 24 OS=Homo sapiens GN=SPP2 PE=1 SV=1	SPP24_HUMAN		24	8.46	Homo sapiens	0	0	0	0	0	0	0	0	0	0	0.00726724	0.00609278	0	0.00467472	0
127	Small proline-rich protein 2A OS=Homo sapiens GN=SPRR2A PE=1 SV=1	SPR2A_HUMAN		8	8.49	unknown	0.00784811	0	0.0243389	0.0045686	0.00395316	0	0.00473147	0	0.00352038	0.00383477	0	0	0	0	0
248	SPARC OS=Homo sapiens GN=SPARC PE=1 SV=1	SPRC_HUMAN		35	4.47	Homo sapiens	0	0	0	0	0	0	0	0	0	0	0	0.000691615	0	0	0
134	Sorbin and SH3 domain-containing protein 2 OS=Homo sapiens GN=SORBS2 PE=1 SV=3	SRBS2_HUMAN		124	8.42	unknown	0	0	0	0	0.000190154	0	0	0	0	0	0	0	0	0	0
181	Serglycin OS=Homo sapiens GN=SRGN PE=1 SV=3	SRGN_HUMAN		18	4.57	Homo sapiens	0	0	0	0	0	0	0	0	0	0	0	0.00210301	0	0.00108044	0.0261355
75	Erythrocyte band 7 integral membrane protein OS=Homo sapiens GN=STOM PE=1 SV=3	STOM_HUMAN		32	8.07	Homo sapiens	0.00334359	0.00296096	0.00298487	0.00626839	0.00592557	0.00594787	0.000590694	0.00165836	0.00742682	0.00461162	0	0.000426489	0	0	0
260	Synaptotagmin-like protein 4 OS=Homo sapiens GN=SYTL4 PE=1 SV=2	SYTL4_HUMAN		76	9.42	Homo sapiens	0	0	0	0	0	0	0	0.000363235	0	0	0	0	0	0	0
223	Tubulin alpha-1B chain OS=Homo sapiens GN=TUBA1B PE=1 SV=1	TBA1B_HUMAN		50	4.7	Homo sapiens	0	0	0	0	0	0	0	0	0	0	0	0.00161886	0	0.00118398	0
164	Tubulin alpha-4A chain OS=Homo sapiens GN=TUBA4A PE=1 SV=1	TBA4A_HUMAN		50	4.69	Homo sapiens	0	0	0	0	0	0	0	0	0	0	0	0.0014497	0	0.00157995	0
159	Tubulin beta-1 chain OS=Homo sapiens GN=TUBB1 PE=1 SV=1	TBB1_HUMAN		50	4.82	Homo sapiens	0	0	0	0	0	0	0	0	0.000413807	0	0	0.00158708	0	0.00224096	0
197	Tubulin beta chain OS=Homo sapiens GN=TUBB PE=1 SV=2	TBB5_HUMAN		50	4.52	Homo sapiens	0	0	0	0	0	0	0	0	0	0	0	0.00103093	0	0.00118535	0
162	Talin-1 OS=Homo sapiens GN=TLN1 PE=1 SV=3	TLN1_HUMAN		270	5.94	Homo sapiens	0	0	0	0	5.85653e-05	0	0	0	0	0	0	0	0	0.000121633	0
257	Tropomyosin alpha-1 chain OS=Homo sapiens GN=TPM1 PE=1 SV=2	TPM1_HUMAN		33	4.39	Homo sapiens	0	0	0	0	0	0	0	0	0	0	0	0.000827129	0	0	0
249	Tropomyosin beta chain OS=Homo sapiens GN=TPM2 PE=1 SV=1	TPM2_HUMAN		33	4.36	unknown	0	0	0	0	0	0	0	0	0	0	0	0.00190351	0	0	0
78	Tropomyosin alpha-4 chain OS=Homo sapiens GN=TPM4 PE=1 SV=3	TPM4_HUMAN		29	4.36	Homo sapiens	0	0	0	0	0	0	0	0	0	0	0.00188772	0.0137204	0.00746876	0.00569377	0
258	Lactotransferrin OS=Homo sapiens GN=LTF PE=1 SV=6	TRFL_HUMAN		78	8.17	unknown	0	0	0	0	0	0	0.000363504	0	0	0	0	0	0	0	0
133	Trypsin-1 OS=Homo sapiens GN=PRSS1 PE=1 SV=1	TRY1_HUMAN		27	6.49	unknown	0.00332813	0	0	0	0.00175604	0.00238358	0.000700082	0	0.000497656	0.00143944	0	0	0	0	0
102	Thrombospondin-4 OS=Homo sapiens GN=THBS4 PE=1 SV=2	TSP4_HUMAN		106	4.23	Homo sapiens	0	0	0	0	0	0	0	0	0	0	0.00237017	0.00155721	0.000200616	0.0021175	0
106	Transthyretin OS=Homo sapiens GN=TTR PE=1 SV=1	TTHY_HUMAN		16	5.58	Homo sapiens	0	0	0	0	0	0	0	0	0	0	0.0102166	0.00548823	0.0169902	0.00702972	0.0162205
231	Fermitin family homolog 3 OS=Homo sapiens GN=FERMT3 PE=1 SV=1	URP2_HUMAN		76	6.98	Homo sapiens	0	0	0	0	0	0	0	0	0	0	0	0.000386205	0	0	0
239	Voltage-dependent anion-selective channel protein 2 OS=Homo sapiens GN=VDAC2 PE=1 SV=2	VDAC2_HUMAN		32	7.65	unknown	0	0	0	0	0.000987516	0	0	0	0	0	0	0	0	0	0
171	Voltage-dependent anion-selective channel protein 3 OS=Homo sapiens GN=VDAC3 PE=1 SV=1	VDAC3_HUMAN		31	8.9	Homo sapiens	0	0	0	0	0.00203653	0	0	0	0.00135344	0	0	0	0	0	0
108	Vitamin D-binding protein OS=Homo sapiens GN=GC PE=1 SV=1	VTDB_HUMAN		53	5.21	Homo sapiens	0	0	0	0	0.00208817	0	0	0	0	0	0.00102432	0.00228025	0	0.00161953	0
4	Vitronectin OS=Homo sapiens GN=VTN PE=1 SV=1	VTNC_HUMAN		54	5.54	Homo sapiens	0.00421453	0.00320019	0.00254585	0.00269423	0.00146172	0	0.00484509	0.00302996	0.002595	0.00511911	0.0780435	0.0679082	0.103465	0.0614438	0.0596131
166	von Willebrand factor OS=Homo sapiens GN=VWF PE=1 SV=4	VWF_HUMAN		309	5.15	Homo sapiens	9.65654e-05	0	0	0	0.000332468	0	0	0	0	0.000350835	0	0	0	0	0
103	Protein Z-dependent protease inhibitor OS=Homo sapiens GN=SERPINA10 PE=1 SV=1	ZPI_HUMAN		51	8.58	Homo sapiens	0	0	0	0	0	0	0	0	0	0	0.00492904	0.00300187	0.00233423	0.000259755	0.00236018
[truncated: 88 more columns]
