# Supplementary material for: Disease-specific protein corona sensor arrays may have disease detection capacity
Source: Royal Society of Chemistry journal article supplement (doi:10.1039/c9nh00097f), 2019-01-01
Supplement: c9nh00097f5.xlsx [file c9nh00097f5.xlsx]

## Sheet: Samples Report of Lung
Lung tumor						CHOL
						Spectral counts															Percent coverage															Unique peptide
#	Identified Proteins (200)	Accession Number	Molecular Weight	pI	Taxonomy	2016-11-16_CHOLPC_lungCancer_A_01	2016-11-16_CHOLPC_lungCancer_A_02	2016-11-16_CHOLPC_lungCancer_A_03	2016-11-16_CHOLPC_lungCancer_B_01	2016-11-16_CHOLPC_lungCancer_B_02	2016-11-16_CHOLPC_lungCancer_B_03	2016-11-16_CHOLPC_lungCancer_C_01	2016-11-16_CHOLPC_lungCancer_C_02	2016-11-16_CHOLPC_lungCancer_C_03	2016-11-16_CHOLPC_lungCancer_D_01	2016-11-16_CHOLPC_lungCancer_D_02	2016-11-16_CHOLPC_lungCancer_D_03	2016-11-16_CHOLPC_lungCancer_E_01	2016-11-16_CHOLPC_lungCancer_E_02	2016-11-16_CHOLPC_lungCancer_E_03	2016-11-16_CHOLPC_lungCancer_A_01	2016-11-16_CHOLPC_lungCancer_A_02	2016-11-16_CHOLPC_lungCancer_A_03	2016-11-16_CHOLPC_lungCancer_B_01	2016-11-16_CHOLPC_lungCancer_B_02	2016-11-16_CHOLPC_lungCancer_B_03	2016-11-16_CHOLPC_lungCancer_C_01	2016-11-16_CHOLPC_lungCancer_C_02	2016-11-16_CHOLPC_lungCancer_C_03	2016-11-16_CHOLPC_lungCancer_D_01	2016-11-16_CHOLPC_lungCancer_D_02	2016-11-16_CHOLPC_lungCancer_D_03	2016-11-16_CHOLPC_lungCancer_E_01	2016-11-16_CHOLPC_lungCancer_E_02	2016-11-16_CHOLPC_lungCancer_E_03	2016-11-16_CHOLPC_lungCancer_A_01	2016-11-16_CHOLPC_lungCancer_A_02	2016-11-16_CHOLPC_lungCancer_A_03	2016-11-16_CHOLPC_lungCancer_B_01	2016-11-16_CHOLPC_lungCancer_B_02	2016-11-16_CHOLPC_lungCancer_B_03	2016-11-16_CHOLPC_lungCancer_C_01	2016-11-16_CHOLPC_lungCancer_C_02	2016-11-16_CHOLPC_lungCancer_C_03	2016-11-16_CHOLPC_lungCancer_D_01	2016-11-16_CHOLPC_lungCancer_D_02	2016-11-16_CHOLPC_lungCancer_D_03	2016-11-16_CHOLPC_lungCancer_E_01	2016-11-16_CHOLPC_lungCancer_E_02
1	Apolipoprotein B-100 OS=Homo sapiens GN=APOB PE=1 SV=2	APOB_HUMAN	516	7.04	Homo sapiens	41	38	39	67	63	57	13	14	12	21	25	28	22	21	28	0.1	0.082	0.092	0.14	0.14	0.12	0.034	0.035	0.03	0.051	0.062	0.065	0.054	0.05	0.065	37	32	35	52	51	44	13	14	12	20	22	25	19	19
2	Ig gamma-1 chain C region OS=Homo sapiens GN=IGHG1 PE=1 SV=1	IGHG1_HUMAN	36	8.31	Homo sapiens	50	56	48	63	64	63	41	44	43	32	37	37	46	44	47	0.52	0.55	0.47	0.48	0.51	0.56	0.5	0.48	0.52	0.53	0.51	0.51	0.45	0.45	0.5	12	14	11	12	14	16	12	11	14	13	13	14	11	11
3	Complement C3 OS=Homo sapiens GN=C3 PE=1 SV=2	CO3_HUMAN	187	6.34	Homo sapiens	38	32	34	39	32	28	17	17	15	22	22	19	33	30	32	0.23	0.19	0.21	0.22	0.19	0.16	0.1	0.086	0.079	0.12	0.13	0.1	0.16	0.15	0.17	33	27	29	31	26	23	15	14	12	17	19	16	24	23
4	Serum albumin OS=Homo sapiens GN=ALB PE=1 SV=2	ALBU_HUMAN	69	6.21	Homo sapiens	34	37	36	26	29	28	23	21	23	79	68	77	36	40	40	0.46	0.53	0.46	0.39	0.4	0.39	0.34	0.38	0.35	0.59	0.54	0.58	0.43	0.43	0.43	24	27	26	20	21	20	18	19	17	40	34	37	27	24
5	Ig mu chain C region OS=Homo sapiens GN=IGHM PE=1 SV=3	IGHM_HUMAN	49	6.77	Homo sapiens	34	30	29	34	36	36	62	68	66	15	16	16	50	42	49	0.29	0.25	0.26	0.26	0.3	0.32	0.37	0.34	0.34	0.19	0.21	0.16	0.28	0.23	0.23	11	10	10	10	12	12	14	14	14	7	9	6	12	9
6	C4b-binding protein alpha chain OS=Homo sapiens GN=C4BPA PE=1 SV=2	C4BPA_HUMAN	67	7.31	Homo sapiens	20	16	19	13	16	14	14	11	11	3	4	5	49	45	41	0.25	0.2	0.24	0.2	0.21	0.17	0.19	0.17	0.16	0.067	0.067	0.082	0.22	0.19	0.19	14	12	14	11	11	9	10	9	8	3	3	4	14	13
7	Vitronectin OS=Homo sapiens GN=VTN PE=1 SV=1	VTNC_HUMAN	54	5.54	Homo sapiens	57	21	10	8	4	5	0	0	0	3	0	0	4	3	4	0.16	0.16	0.16	0.16	0.098	0.11	0	0	0	0.046	0	0	0.077	0.056	0.077	6	6	6	6	4	4	0	0	0	2	0	0	3	2
8	Keratin, type II cytoskeletal 1 OS=Homo sapiens GN=KRT1 PE=1 SV=6	K2C1_HUMAN	66	8.33	Homo sapiens	37	44	43	53	42	42	44	50	51	37	37	34	20	20	20	0.46	0.5	0.51	0.58	0.49	0.5	0.48	0.5	0.53	0.51	0.52	0.51	0.28	0.27	0.28	26	29	30	37	27	28	32	35	36	31	32	31	16	16
9	Ig kappa chain C region OS=Homo sapiens GN=IGKC PE=1 SV=1	IGKC_HUMAN	12	5.68	Homo sapiens	20	18	23	20	16	16	26	24	27	16	16	20	15	10	13	0.8	0.65	0.87	0.81	0.66	0.81	0.72	0.8	0.87	0.75	0.75	0.7	0.53	0.37	0.3	6	5	7	6	5	6	7	7	7	6	6	6	4	3
10	Complement C4-A OS=Homo sapiens GN=C4A PE=1 SV=2	CO4A_HUMAN	193	7.08	Homo sapiens	17	14	11	10	9	9	7	6	8	5	8	6	13	13	10	0.12	0.087	0.069	0.061	0.053	0.05	0.044	0.036	0.048	0.026	0.056	0.044	0.062	0.08	0.052	17	14	11	9	8	8	7	6	8	4	8	6	10	12
11	Complement factor H OS=Homo sapiens GN=CFH PE=1 SV=4	CFAH_HUMAN	139	6.59	Homo sapiens	34	31	31	12	16	17	9	10	9	10	12	12	22	19	17	0.2	0.18	0.19	0.11	0.12	0.12	0.086	0.098	0.074	0.1	0.12	0.12	0.14	0.13	0.12	18	16	17	10	11	11	8	9	7	10	11	11	13	11
12	Keratin, type I cytoskeletal 9 OS=Homo sapiens GN=KRT9 PE=1 SV=3	K1C9_HUMAN	62	4.89	Homo sapiens	30	34	44	38	34	35	29	28	24	20	19	19	12	12	13	0.56	0.5	0.64	0.58	0.48	0.51	0.45	0.45	0.45	0.37	0.43	0.41	0.24	0.31	0.28	22	22	24	27	22	23	20	19	19	15	17	17	9	10
13	Fibrinogen beta chain OS=Homo sapiens GN=FGB PE=1 SV=2	FIBB_HUMAN	56	8.38	Homo sapiens	6	8	7	8	6	5	0	0	0	7	6	7	5	5	4	0.17	0.19	0.19	0.22	0.17	0.12	0	0	0	0.19	0.15	0.18	0.13	0.14	0.12	6	7	6	8	6	5	0	0	0	7	6	7	5	5
14	Ig lambda-3 chain C regions OS=Homo sapiens GN=IGLC3 PE=1 SV=1	LAC3_HUMAN	11	7.34	Homo sapiens	17	17	17	15	16	18	14	18	20	16	15	15	17	17	16	0.56	0.42	0.49	0.42	0.42	0.42	0.42	0.42	0.49	0.42	0.42	0.42	0.42	0.42	0.49	4	4	5	3	3	3	3	4	5	3	4	3	3	4
15	Alpha-2-macroglobulin OS=Homo sapiens GN=A2M PE=1 SV=3	A2MG_HUMAN	163	6.43	Homo sapiens	12	11	13	14	16	14	14	13	12	12	17	17	11	14	10	0.079	0.1	0.1	0.092	0.11	0.097	0.082	0.096	0.078	0.096	0.12	0.12	0.078	0.072	0.063	10	11	13	11	14	12	10	12	10	11	14	14	10	10
16	Ig gamma-3 chain C region OS=Homo sapiens GN=IGHG3 PE=1 SV=2	IGHG3_HUMAN	41	7.95	Homo sapiens	43	44	38	37	45	40	26	23	23	20	25	20	37	34	35	0.4	0.46	0.37	0.3	0.37	0.46	0.42	0.37	0.39	0.45	0.43	0.39	0.31	0.31	0.35	5	6	5	5	6	6	6	5	5	5	5	4	5	5
17	Prothrombin OS=Homo sapiens GN=F2 PE=1 SV=2	THRB_HUMAN	70	5.7	Homo sapiens	6	5	4	0	0	0	0	0	0	0	0	0	0	0	0	0.1	0.074	0.074	0	0	0	0	0	0	0	0	0	0	0	0	5	4	4	0	0	0	0	0	0	0	0	0	0	0
18	Keratin, type I cytoskeletal 10 OS=Homo sapiens GN=KRT10 PE=1 SV=6	K1C10_HUMAN	59	4.88	Homo sapiens	23	23	20	20	25	23	25	31	27	14	18	13	4	7	7	0.37	0.37	0.38	0.32	0.31	0.35	0.32	0.35	0.37	0.19	0.32	0.23	0.086	0.11	0.11	19	20	18	18	19	20	20	22	20	13	16	12	4	6
19	Haptoglobin OS=Homo sapiens GN=HP PE=1 SV=1	HPT_HUMAN	45	6.56	Homo sapiens	9	8	12	12	9	7	7	3	3	15	16	11	4	2	0	0.25	0.25	0.34	0.3	0.24	0.24	0.17	0.089	0.091	0.35	0.28	0.24	0.084	0.069	0	8	8	11	11	8	7	5	3	3	13	12	10	3	2
20	Apolipoprotein D OS=Homo sapiens GN=APOD PE=1 SV=1	APOD_HUMAN	21	4.79	Homo sapiens	9	10	8	15	15	16	7	9	8	8	8	9	8	8	10	0.25	0.29	0.29	0.31	0.31	0.31	0.22	0.25	0.25	0.26	0.26	0.31	0.25	0.31	0.25	5	6	6	6	5	6	5	5	5	5	5	6	5	6
21	Inter-alpha-trypsin inhibitor heavy chain H2 OS=Homo sapiens GN=ITIH2 PE=1 SV=2	ITIH2_HUMAN	106	6.85	Homo sapiens	0	0	2	0	0	0	0	0	0	0	0	0	0	0	0	0	0	0.021	0	0	0	0	0	0	0	0	0	0	0	0	0	0	2	0	0	0	0	0	0	0	0	0	0	0
22	Fibrinogen gamma chain OS=Homo sapiens GN=FGG PE=1 SV=3	FIBG_HUMAN	52	5.32	Homo sapiens	6	5	6	2	4	4	0	0	0	4	5	5	6	5	4	0.12	0.12	0.16	0.055	0.12	0.12	0	0	0	0.12	0.14	0.14	0.11	0.095	0.095	5	5	6	2	4	4	0	0	0	4	5	5	5	4
23	Serotransferrin OS=Homo sapiens GN=TF PE=1 SV=3	TRFE_HUMAN	77	7.13	Homo sapiens	4	4	3	4	3	3	3	0	3	22	22	26	11	9	9	0.069	0.056	0.056	0.074	0.049	0.059	0.057	0	0.057	0.31	0.3	0.33	0.16	0.14	0.15	4	3	3	4	3	3	3	0	3	20	19	22	11	9
24	Hyaluronan-binding protein 2 OS=Homo sapiens GN=HABP2 PE=1 SV=1	HABP2_HUMAN	63	6.52	Homo sapiens	0	0	3	0	0	0	0	0	0	0	0	0	0	0	0	0	0	0.043	0	0	0	0	0	0	0	0	0	0	0	0	0	0	2	0	0	0	0	0	0	0	0	0	0	0
25	CD5 antigen-like OS=Homo sapiens GN=CD5L PE=1 SV=1	CD5L_HUMAN	38	5.15	Homo sapiens	10	9	9	10	10	9	19	16	17	5	7	5	15	13	15	0.3	0.32	0.32	0.32	0.36	0.36	0.4	0.36	0.36	0.19	0.22	0.18	0.3	0.32	0.32	7	7	7	7	8	8	11	9	9	4	5	4	8	9
26	Inter-alpha-trypsin inhibitor heavy chain H1 OS=Homo sapiens GN=ITIH1 PE=1 SV=3	ITIH1_HUMAN	101	6.78	Homo sapiens	0	0	0	0	0	0	0	0	0	0	0	0	0	0	0	0	0	0	0	0	0	0	0	0	0	0	0	0	0	0	0	0	0	0	0	0	0	0	0	0	0	0	0	0
27	Ig gamma-2 chain C region OS=Homo sapiens GN=IGHG2 PE=1 SV=2	IGHG2_HUMAN	36	7.66	Homo sapiens	43	42	0	39	41	36	0	0	0	0	0	0	30	0	0	0.33	0.33	0	0.29	0.33	0.29	0	0	0	0	0	0	0.23	0	0	3	2	0	2	2	2	0	0	0	0	0	0	2	0
28	Apolipoprotein A-I OS=Homo sapiens GN=APOA1 PE=1 SV=1	APOA1_HUMAN	31	5.5	Homo sapiens	5	7	6	2	0	3	6	4	4	11	12	11	0	0	0	0.23	0.24	0.28	0.11	0	0.11	0.24	0.16	0.18	0.4	0.37	0.4	0	0	0	5	5	6	2	0	2	6	4	4	11	10	11	0	0
29	Keratin, type II cytoskeletal 2 epidermal OS=Homo sapiens GN=KRT2 PE=1 SV=2	K22E_HUMAN	65	8.17	Homo sapiens	19	19	20	19	14	16	21	23	26	12	11	9	8	6	10	0.36	0.33	0.31	0.31	0.25	0.25	0.36	0.35	0.4	0.17	0.2	0.18	0.14	0.088	0.15	16	15	14	13	10	11	17	17	18	7	10	7	6	3
30	Serum paraoxonase/arylesterase 1 OS=Homo sapiens GN=PON1 PE=1 SV=3	PON1_HUMAN	40	4.89	Homo sapiens	2	2	2	0	0	0	0	0	0	0	0	0	0	0	0	0.085	0.079	0.099	0	0	0	0	0	0	0	0	0	0	0	0	2	2	2	0	0	0	0	0	0	0	0	0	0	0
31	Plasminogen OS=Homo sapiens GN=PLG PE=1 SV=2	PLMN_HUMAN	91	7.25	Homo sapiens	3	5	3	4	0	0	0	0	0	0	0	0	0	0	0	0.052	0.072	0.051	0.064	0	0	0	0	0	0	0	0	0	0	0	3	4	3	4	0	0	0	0	0	0	0	0	0	0
32	Hornerin OS=Homo sapiens GN=HRNR PE=1 SV=2	HORN_HUMAN	282	10.24	Homo sapiens	22	22	16	7	12	10	11	11	9	9	8	11	0	0	0	0.095	0.1	0.078	0.039	0.052	0.052	0.055	0.059	0.046	0.042	0.04	0.06	0	0	0	14	15	11	6	8	8	8	9	7	7	7	9	0	0
33	Vitamin K-dependent protein S OS=Homo sapiens GN=PROS1 PE=1 SV=1	PROS_HUMAN	75	5.37	Homo sapiens	0	0	0	0	0	0	0	0	0	0	0	0	0	0	0	0	0	0	0	0	0	0	0	0	0	0	0	0	0	0	0	0	0	0	0	0	0	0	0	0	0	0	0	0
34	Keratin, type I cytoskeletal 16 OS=Homo sapiens GN=KRT16 PE=1 SV=4	K1C16_HUMAN	51	4.69	Homo sapiens	11	16	15	30	24	26	11	14	14	8	5	0	2	4	5	0.21	0.29	0.26	0.48	0.42	0.44	0.26	0.25	0.26	0.16	0.076	0	0.042	0.089	0.11	7	11	10	19	16	17	9	9	9	5	2	0	2	3
35	Ceruloplasmin OS=Homo sapiens GN=CP PE=1 SV=1	CERU_HUMAN	122	5.5	Homo sapiens	0	0	0	0	0	0	0	0	0	3	0	0	0	0	0	0	0	0	0	0	0	0	0	0	0.037	0	0	0	0	0	0	0	0	0	0	0	0	0	0	3	0	0	0	0
36	Alpha-1-antitrypsin OS=Homo sapiens GN=SERPINA1 PE=1 SV=3	A1AT_HUMAN	47	5.31	Homo sapiens	0	0	0	2	0	2	0	0	0	12	12	15	0	0	0	0	0	0	0.067	0	0.067	0	0	0	0.28	0.26	0.26	0	0	0	0	0	0	2	0	2	0	0	0	9	8	8	0	0
37	Cartilage oligomeric matrix protein OS=Homo sapiens GN=COMP PE=1 SV=2	COMP_HUMAN	83	4.16	Homo sapiens	0	0	0	0	0	0	0	0	0	0	0	0	0	0	0	0	0	0	0	0	0	0	0	0	0	0	0	0	0	0	0	0	0	0	0	0	0	0	0	0	0	0	0	0
38	Fibronectin OS=Homo sapiens GN=FN1 PE=1 SV=4	FINC_HUMAN	263	5.45	Homo sapiens	0	0	0	0	0	0	0	0	0	0	0	0	0	0	0	0	0	0	0	0	0	0	0	0	0	0	0	0	0	0	0	0	0	0	0	0	0	0	0	0	0	0	0	0
39	Complement C5 OS=Homo sapiens GN=C5 PE=1 SV=4	CO5_HUMAN	188	6.49	Homo sapiens	3	4	4	3	0	3	0	0	0	0	0	0	0	0	0	0.02	0.02	0.025	0.016	0	0.016	0	0	0	0	0	0	0	0	0	3	3	4	3	0	3	0	0	0	0	0	0	0	0
40	Apolipoprotein E OS=Homo sapiens GN=APOE PE=1 SV=1	APOE_HUMAN	36	5.42	Homo sapiens	3	3	3	0	0	0	0	0	0	0	0	0	0	0	0	0.1	0.11	0.1	0	0	0	0	0	0	0	0	0	0	0	0	3	3	3	0	0	0	0	0	0	0	0	0	0	0
41	Fibrinogen alpha chain OS=Homo sapiens GN=FGA PE=1 SV=2	FIBA_HUMAN	95	5.87	Homo sapiens	4	2	3	2	0	2	0	0	0	9	6	8	3	3	3	0.057	0.032	0.032	0.032	0	0.032	0	0	0	0.12	0.074	0.087	0.046	0.047	0.046	4	2	2	2	0	2	0	0	0	7	4	5	3	3
42	Keratin, type II cytoskeletal 6A OS=Homo sapiens GN=KRT6A PE=1 SV=3	K2C6A_HUMAN	60	8.16	Homo sapiens	15	11	15	20	16	17	12	11	14	7	5	0	7	4	5	0.26	0.19	0.24	0.34	0.27	0.3	0.17	0.19	0.16	0.098	0.096	0	0.12	0.082	0.098	10	5	9	12	9	11	5	6	5	3	2	0	3	2
43	Immunoglobulin lambda-like polypeptide 5 OS=Homo sapiens GN=IGLL5 PE=2 SV=2	IGLL5_HUMAN	23	9.05	Homo sapiens	14	11	11	6	7	8	6	0	0	0	0	0	5	0	7	0.31	0.24	0.24	0.2	0.15	0.21	0.15	0	0	0	0	0	0.15	0	0.19	3	3	2	2	2	2	2	0	0	0	0	0	2	0
44	Ig alpha-1 chain C region OS=Homo sapiens GN=IGHA1 PE=1 SV=2	IGHA1_HUMAN	38	6.49	Homo sapiens	5	3	5	6	4	4	2	3	2	5	4	3	2	0	2	0.15	0.082	0.15	0.19	0.11	0.12	0.071	0.091	0.048	0.12	0.11	0.091	0.071	0	0.054	5	3	5	6	4	4	2	3	2	4	4	3	2	0
45	Complement C1q subcomponent subunit C OS=Homo sapiens GN=C1QC PE=1 SV=3	C1QC_HUMAN	26	8.58	Homo sapiens	7	4	5	5	5	4	7	6	6	0	0	0	4	4	3	0.22	0.16	0.16	0.16	0.16	0.16	0.22	0.22	0.22	0	0	0	0.27	0.16	0.16	4	3	3	3	3	3	4	4	4	0	0	0	4	3
46	Inter-alpha-trypsin inhibitor heavy chain H3 OS=Homo sapiens GN=ITIH3 PE=1 SV=2	ITIH3_HUMAN	100	5.49	Homo sapiens	0	0	0	0	0	0	0	0	0	0	0	0	0	0	0	0	0	0	0	0	0	0	0	0	0	0	0	0	0	0	0	0	0	0	0	0	0	0	0	0	0	0	0	0
47	Keratin, type II cytoskeletal 5 OS=Homo sapiens GN=KRT5 PE=1 SV=3	K2C5_HUMAN	62	7.91	Homo sapiens	15	13	16	11	13	15	11	11	13	9	6	9	0	5	5	0.22	0.19	0.23	0.2	0.21	0.24	0.14	0.15	0.17	0.11	0.1	0.13	0	0.092	0.09	6	7	7	6	7	7	4	4	5	3	4	5	0	3
48	Kininogen-1 OS=Homo sapiens GN=KNG1 PE=1 SV=2	KNG1_HUMAN	72	6.8	Homo sapiens	0	0	0	0	0	0	0	0	0	2	0	0	0	0	0	0	0	0	0	0	0	0	0	0	0.031	0	0	0	0	0	0	0	0	0	0	0	0	0	0	2	0	0	0	0
49	Ficolin-3 OS=Homo sapiens GN=FCN3 PE=1 SV=2	FCN3_HUMAN	33	6.66	Homo sapiens	2	0	0	6	4	4	3	2	0	0	0	0	8	8	9	0.064	0	0	0.21	0.13	0.15	0.13	0.064	0	0	0	0	0.16	0.22	0.22	2	0	0	5	3	3	3	2	0	0	0	0	4	5
50	Apolipoprotein C-III OS=Homo sapiens GN=APOC3 PE=1 SV=1	APOC3_HUMAN	11	5.04	Homo sapiens	3	2	3	2	2	0	2	2	0	0	0	0	0	0	0	0.27	0.27	0.27	0.27	0.27	0	0.27	0.27	0	0	0	0	0	0	0	2	2	2	2	2	0	2	2	0	0	0	0	0	0
51	Keratin, type I cytoskeletal 14 OS=Homo sapiens GN=KRT14 PE=1 SV=4	K1C14_HUMAN	52	4.81	Homo sapiens	15	14	11	23	20	17	9	11	14	10	0	0	0	0	0	0.26	0.29	0.21	0.41	0.38	0.28	0.2	0.19	0.27	0.2	0	0	0	0	0	4	5	4	8	8	4	3	3	4	3	0	0	0	0
52	Histidine-rich glycoprotein OS=Homo sapiens GN=HRG PE=1 SV=1	HRG_HUMAN	60	7.52	Homo sapiens	0	0	0	0	0	0	0	0	0	0	0	0	0	0	0	0	0	0	0	0	0	0	0	0	0	0	0	0	0	0	0	0	0	0	0	0	0	0	0	0	0	0	0	0
53	Coagulation factor IX OS=Homo sapiens GN=F9 PE=1 SV=2	FA9_HUMAN	52	5.16	Homo sapiens	0	0	0	0	0	0	0	0	0	0	0	0	0	0	0	0	0	0	0	0	0	0	0	0	0	0	0	0	0	0	0	0	0	0	0	0	0	0	0	0	0	0	0	0
54	Apolipoprotein(a) OS=Homo sapiens GN=LPA PE=1 SV=1	APOA_HUMAN	501	5.77	Homo sapiens	2	2	0	8	11	8	3	3	3	7	5	6	0	0	2	0.0051	0.0051	0	0.022	0.026	0.022	0.0084	0.0079	0.0079	0.016	0.013	0.016	0	0	0.0051	2	2	0	8	10	8	3	3	3	6	5	6	0	0
55	Protein AMBP OS=Homo sapiens GN=AMBP PE=1 SV=1	AMBP_HUMAN	39	6.15	Homo sapiens	0	0	0	0	0	0	0	0	0	0	0	0	0	0	0	0	0	0	0	0	0	0	0	0	0	0	0	0	0	0	0	0	0	0	0	0	0	0	0	0	0	0	0	0
56	Immunoglobulin J chain OS=Homo sapiens GN=IGJ PE=1 SV=4	IGJ_HUMAN	18	4.87	Homo sapiens	4	2	4	3	3	3	4	5	4	0	0	3	3	4	3	0.18	0.12	0.18	0.18	0.18	0.18	0.18	0.18	0.18	0	0	0.12	0.18	0.18	0.12	3	2	3	3	3	3	3	3	3	0	0	2	3	3
57	Clusterin OS=Homo sapiens GN=CLU PE=1 SV=1	CLUS_HUMAN	52	6.21	Homo sapiens	0	0	0	0	0	0	0	0	0	0	0	0	0	0	0	0	0	0	0	0	0	0	0	0	0	0	0	0	0	0	0	0	0	0	0	0	0	0	0	0	0	0	0	0
58	Apolipoprotein A-IV OS=Homo sapiens GN=APOA4 PE=1 SV=3	APOA4_HUMAN	45	5.05	Homo sapiens	0	0	0	0	0	0	0	0	0	0	0	0	0	0	0	0	0	0	0	0	0	0	0	0	0	0	0	0	0	0	0	0	0	0	0	0	0	0	0	0	0	0	0	0
59	Properdin OS=Homo sapiens GN=CFP PE=1 SV=2	PROP_HUMAN	51	7.92	Homo sapiens	6	5	6	4	4	4	7	5	6	0	0	0	6	9	5	0.14	0.14	0.14	0.14	0.13	0.12	0.14	0.11	0.14	0	0	0	0.17	0.19	0.14	4	4	4	4	4	3	5	4	5	0	0	0	5	6
60	Complement component C9 OS=Homo sapiens GN=C9 PE=1 SV=2	CO9_HUMAN	63	5.27	Homo sapiens	0	0	0	0	0	0	0	0	0	0	0	0	0	0	0	0	0	0	0	0	0	0	0	0	0	0	0	0	0	0	0	0	0	0	0	0	0	0	0	0	0	0	0	0
61	C4b-binding protein beta chain OS=Homo sapiens GN=C4BPB PE=1 SV=1	C4BPB_HUMAN	28	4.8	Homo sapiens	0	0	0	0	0	0	0	0	0	0	0	0	2	0	0	0	0	0	0	0	0	0	0	0	0	0	0	0.095	0	0	0	0	0	0	0	0	0	0	0	0	0	0	2	0
62	Complement C1s subcomponent OS=Homo sapiens GN=C1S PE=1 SV=1	C1S_HUMAN	77	4.59	Homo sapiens	0	0	0	0	0	0	0	0	0	0	0	0	0	0	0	0	0	0	0	0	0	0	0	0	0	0	0	0	0	0	0	0	0	0	0	0	0	0	0	0	0	0	0	0
63	Ig kappa chain V-III region HAH OS=Homo sapiens PE=2 SV=1	KV312_HUMAN	14	4.59	Homo sapiens	0	2	4	2	0	0	2	0	2	0	0	0	0	0	0	0	0.26	0.26	0.26	0	0	0.26	0	0.26	0	0	0	0	0	0	0	2	2	2	0	0	2	0	2	0	0	0	0	0
64	Ig heavy chain V-III region TRO OS=Homo sapiens PE=1 SV=1	HV301_HUMAN	13	10	Homo sapiens	0	0	0	0	0	0	0	0	0	0	0	0	0	0	0	0	0	0	0	0	0	0	0	0	0	0	0	0	0	0	0	0	0	0	0	0	0	0	0	0	0	0	0	0
65	Alpha-1-antichymotrypsin OS=Homo sapiens GN=SERPINA3 PE=1 SV=2	AACT_HUMAN	48	5.19	Homo sapiens	0	0	0	0	0	0	0	0	0	0	0	0	0	0	0	0	0	0	0	0	0	0	0	0	0	0	0	0	0	0	0	0	0	0	0	0	0	0	0	0	0	0	0	0
66	Ig heavy chain V-III region 23 OS=Homo sapiens GN=IGHV3-23 PE=1 SV=2	HV303_HUMAN	13	8.46	Homo sapiens	0	2	2	3	0	0	4	6	5	0	0	0	0	2	2	0	0.26	0.26	0.26	0	0	0.26	0.26	0.26	0	0	0	0	0.26	0.26	0	2	2	2	0	0	2	2	2	0	0	0	0	2
67	Ig heavy chain V-III region WAS OS=Homo sapiens PE=1 SV=1	HV315_HUMAN	13	8.84	Homo sapiens	0	0	0	0	0	0	0	0	0	0	0	0	0	0	0	0	0	0	0	0	0	0	0	0	0	0	0	0	0	0	0	0	0	0	0	0	0	0	0	0	0	0	0	0
68	Heparin cofactor 2 OS=Homo sapiens GN=SERPIND1 PE=1 SV=3	HEP2_HUMAN	57	6.89	Homo sapiens	0	0	0	0	0	0	0	0	0	0	0	0	0	0	0	0	0	0	0	0	0	0	0	0	0	0	0	0	0	0	0	0	0	0	0	0	0	0	0	0	0	0	0	0
69	Ig alpha-2 chain C region OS=Homo sapiens GN=IGHA2 PE=1 SV=3	IGHA2_HUMAN	37	6.02	Homo sapiens	7	6	6	6	5	0	5	6	0	0	0	0	0	0	0	0.19	0.17	0.19	0.19	0.19	0	0.15	0.17	0	0	0	0	0	0	0	2	2	2	2	2	0	2	2	0	0	0	0	0	0
70	Apolipoprotein M OS=Homo sapiens GN=APOM PE=1 SV=2	APOM_HUMAN	21	5.92	Homo sapiens	0	0	0	0	0	0	0	0	0	0	0	0	0	0	0	0	0	0	0	0	0	0	0	0	0	0	0	0	0	0	0	0	0	0	0	0	0	0	0	0	0	0	0	0
71	Thrombospondin-1 OS=Homo sapiens GN=THBS1 PE=1 SV=2	TSP1_HUMAN	129	4.51	Homo sapiens	0	0	0	0	0	0	0	0	0	0	0	0	0	0	0	0	0	0	0	0	0	0	0	0	0	0	0	0	0	0	0	0	0	0	0	0	0	0	0	0	0	0	0	0
72	Alpha-2-HS-glycoprotein OS=Homo sapiens GN=AHSG PE=1 SV=1	FETUA_HUMAN	39	5.52	Homo sapiens	0	0	0	0	0	0	0	0	0	0	0	2	0	0	0	0	0	0	0	0	0	0	0	0	0	0	0.065	0	0	0	0	0	0	0	0	0	0	0	0	0	0	2	0	0
73	Vitamin D-binding protein OS=Homo sapiens GN=GC PE=1 SV=1	VTDB_HUMAN	53	5.21	Homo sapiens	0	0	0	0	0	0	0	0	0	3	4	5	0	0	0	0	0	0	0	0	0	0	0	0	0.059	0.095	0.13	0	0	0	0	0	0	0	0	0	0	0	0	2	3	4	0	0
74	Coagulation factor X OS=Homo sapiens GN=F10 PE=1 SV=2	FA10_HUMAN	55	5.74	Homo sapiens	0	0	0	0	0	0	0	0	0	0	0	0	0	0	0	0	0	0	0	0	0	0	0	0	0	0	0	0	0	0	0	0	0	0	0	0	0	0	0	0	0	0	0	0
75	Ig kappa chain V-I region EU OS=Homo sapiens PE=1 SV=1	KV106_HUMAN	12	8.46	Homo sapiens	3	2	3	2	2	2	2	2	0	0	0	0	0	0	0	0.27	0.27	0.27	0.27	0.27	0.27	0.27	0.27	0	0	0	0	0	0	0	2	2	2	2	2	2	2	2	0	0	0	0	0	0
76	Alpha-1-acid glycoprotein 1 OS=Homo sapiens GN=ORM1 PE=1 SV=1	A1AG1_HUMAN	24	4.66	Homo sapiens	0	0	0	0	0	0	0	0	0	2	2	2	0	0	0	0	0	0	0	0	0	0	0	0	0.11	0.11	0.11	0	0	0	0	0	0	0	0	0	0	0	0	2	2	2	0	0
77	Complement C1q subcomponent subunit B OS=Homo sapiens GN=C1QB PE=1 SV=3	C1QB_HUMAN	27	8.87	Homo sapiens	3	3	4	2	0	0	0	0	0	0	0	0	0	0	0	0.11	0.11	0.11	0.087	0	0	0	0	0	0	0	0	0	0	0	2	2	2	2	0	0	0	0	0	0	0	0	0	0
78	Haptoglobin-related protein OS=Homo sapiens GN=HPR PE=2 SV=2	HPTR_HUMAN	39	7.11	Homo sapiens	0	0	7	0	0	0	5	3	3	0	0	0	0	0	2	0	0	0.28	0	0	0	0.19	0.14	0.14	0	0	0	0	0	0.11	0	0	2	0	0	0	2	2	2	0	0	0	0	0
79	Galectin-3-binding protein OS=Homo sapiens GN=LGALS3BP PE=1 SV=1	LG3BP_HUMAN	65	4.9	Homo sapiens	0	2	3	0	2	2	3	2	2	0	0	0	7	4	7	0	0.039	0.062	0	0.041	0.041	0.062	0.043	0.039	0	0	0	0.12	0.055	0.15	0	2	3	0	2	2	3	2	2	0	0	0	6	3
80	Coagulation factor V OS=Homo sapiens GN=F5 PE=1 SV=4	FA5_HUMAN	252	5.95	Homo sapiens	0	0	0	0	0	0	0	0	0	0	0	0	0	0	0	0	0	0	0	0	0	0	0	0	0	0	0	0	0	0	0	0	0	0	0	0	0	0	0	0	0	0	0	0
81	Complement component C8 alpha chain OS=Homo sapiens GN=C8A PE=1 SV=2	CO8A_HUMAN	65	6.41	Homo sapiens	0	0	0	0	0	0	0	0	0	0	0	0	0	0	0	0	0	0	0	0	0	0	0	0	0	0	0	0	0	0	0	0	0	0	0	0	0	0	0	0	0	0	0	0
82	Ig kappa chain V-I region AU OS=Homo sapiens PE=1 SV=1	KV102_HUMAN	12	4.34	Homo sapiens	0	0	0	0	0	0	0	0	0	0	0	0	0	0	0	0	0	0	0	0	0	0	0	0	0	0	0	0	0	0	0	0	0	0	0	0	0	0	0	0	0	0	0	0
83	Beta-2-glycoprotein 1 OS=Homo sapiens GN=APOH PE=1 SV=3	APOH_HUMAN	38	8.03	Homo sapiens	0	0	0	0	0	0	0	0	0	0	0	0	0	0	0	0	0	0	0	0	0	0	0	0	0	0	0	0	0	0	0	0	0	0	0	0	0	0	0	0	0	0	0	0
84	C-reactive protein OS=Homo sapiens GN=CRP PE=1 SV=1	CRP_HUMAN	25	5.32	Homo sapiens	0	0	0	0	0	0	0	0	0	0	0	0	0	0	0	0	0	0	0	0	0	0	0	0	0	0	0	0	0	0	0	0	0	0	0	0	0	0	0	0	0	0	0	0
85	Vitamin K-dependent protein Z OS=Homo sapiens GN=PROZ PE=1 SV=2	PROZ_HUMAN	45	5.87	Homo sapiens	0	0	0	0	0	0	0	0	0	0	0	0	0	0	0	0	0	0	0	0	0	0	0	0	0	0	0	0	0	0	0	0	0	0	0	0	0	0	0	0	0	0	0	0
86	Complement C1q subcomponent subunit A OS=Homo sapiens GN=C1QA PE=1 SV=2	C1QA_HUMAN	26	9.45	Homo sapiens	0	2	2	2	2	2	0	2	3	2	2	2	2	2	2	0	0.045	0.045	0.045	0.045	0.045	0	0.045	0.045	0.045	0.045	0.045	0.045	0.045	0.045	0	2	2	2	2	2	0	2	2	2	2	2	2	2
87	Thrombospondin-4 OS=Homo sapiens GN=THBS4 PE=1 SV=2	TSP4_HUMAN	106	4.23	Homo sapiens	0	0	0	0	0	0	0	0	0	0	0	0	0	0	0	0	0	0	0	0	0	0	0	0	0	0	0	0	0	0	0	0	0	0	0	0	0	0	0	0	0	0	0	0
88	Complement C1r subcomponent OS=Homo sapiens GN=C1R PE=1 SV=2	C1R_HUMAN	80	6.14	Homo sapiens	0	0	0	0	0	0	0	0	0	0	0	0	0	0	0	0	0	0	0	0	0	0	0	0	0	0	0	0	0	0	0	0	0	0	0	0	0	0	0	0	0	0	0	0
89	Hemopexin OS=Homo sapiens GN=HPX PE=1 SV=2	HEMO_HUMAN	52	7.02	Homo sapiens	0	0	0	0	0	0	0	0	0	3	4	3	0	0	0	0	0	0	0	0	0	0	0	0	0.089	0.14	0.12	0	0	0	0	0	0	0	0	0	0	0	0	3	4	3	0	0
90	Transthyretin OS=Homo sapiens GN=TTR PE=1 SV=1	TTHY_HUMAN	16	5.58	Homo sapiens	0	0	0	0	0	0	0	0	0	0	0	0	0	0	0	0	0	0	0	0	0	0	0	0	0	0	0	0	0	0	0	0	0	0	0	0	0	0	0	0	0	0	0	0
91	Filamin-A OS=Homo sapiens GN=FLNA PE=1 SV=4	FLNA_HUMAN	281	5.95	Homo sapiens	0	0	0	0	0	0	0	0	0	0	0	0	8	5	8	0	0	0	0	0	0	0	0	0	0	0	0	0.034	0.026	0.031	0	0	0	0	0	0	0	0	0	0	0	0	6	4
92	Dermcidin OS=Homo sapiens GN=DCD PE=1 SV=2	DCD_HUMAN	11	6.52	Homo sapiens	0	2	0	0	0	0	3	4	5	0	2	2	0	0	0	0	0.2	0	0	0	0	0.35	0.35	0.35	0	0.2	0.2	0	0	0	0	2	0	0	0	0	3	4	4	0	2	2	0	0
93	Keratin, type I cytoskeletal 17 OS=Homo sapiens GN=KRT17 PE=1 SV=2	K1C17_HUMAN	48	4.67	Homo sapiens	12	9	8	14	11	11	6	8	0	0	0	0	0	0	0	0.29	0.2	0.2	0.31	0.25	0.25	0.15	0.18	0	0	0	0	0	0	0	4	3	4	5	5	5	2	2	0	0	0	0	0	0
94	Ig kappa chain V-II region RPMI 6410 OS=Homo sapiens PE=4 SV=1	KV206_HUMAN	15	9.53	Homo sapiens	3	3	3	0	0	0	0	0	0	0	0	0	0	0	0	0.29	0.29	0.29	0	0	0	0	0	0	0	0	0	0	0	0	2	2	2	0	0	0	0	0	0	0	0	0	0	0
95	Ig heavy chain V-III region GAL OS=Homo sapiens PE=1 SV=1	HV320_HUMAN	13	8.7	Homo sapiens	0	2	2	0	2	3	2	2	2	0	0	0	0	0	0	0	0.17	0.17	0	0.23	0.31	0.22	0.22	0.22	0	0	0	0	0	0	0	2	2	0	2	3	2	2	2	0	0	0	0	0
96	Ig gamma-4 chain C region OS=Homo sapiens GN=IGHG4 PE=1 SV=1	IGHG4_HUMAN	36	7.41	Homo sapiens	0	0	0	0	0	0	0	0	0	0	0	0	0	0	0	0	0	0	0	0	0	0	0	0	0	0	0	0	0	0	0	0	0	0	0	0	0	0	0	0	0	0	0	0
97	Vitamin K-dependent protein C OS=Homo sapiens GN=PROC PE=1 SV=1	PROC_HUMAN	52	6.23	Homo sapiens	0	0	0	0	0	0	0	0	0	0	0	0	0	0	0	0	0	0	0	0	0	0	0	0	0	0	0	0	0	0	0	0	0	0	0	0	0	0	0	0	0	0	0	0
98	Apolipoprotein C-II OS=Homo sapiens GN=APOC2 PE=1 SV=1	APOC2_HUMAN	11	4.36	Homo sapiens	0	0	2	0	0	0	0	0	0	0	0	0	0	0	0	0	0	0.2	0	0	0	0	0	0	0	0	0	0	0	0	0	0	2	0	0	0	0	0	0	0	0	0	0	0
99	Ig kappa chain V-IV region (Fragment) OS=Homo sapiens GN=IGKV4-1 PE=4 SV=1	KV401_HUMAN (+1)	13	4.85	Homo sapiens	2	0	2	0	0	0	0	0	0	0	0	0	0	0	0	0.25	0	0.25	0	0	0	0	0	0	0	0	0	0	0	0	2	0	2	0	0	0	0	0	0	0	0	0	0	0
100	Ig heavy chain V-III region WEA OS=Homo sapiens PE=1 SV=1	HV302_HUMAN	12	8.7	Homo sapiens	0	0	0	0	0	0	0	0	0	0	0	0	0	0	0	0	0	0	0	0	0	0	0	0	0	0	0	0	0	0	0	0	0	0	0	0	0	0	0	0	0	0	0	0
101	Protein Z-dependent protease inhibitor OS=Homo sapiens GN=SERPINA10 PE=1 SV=1	ZPI_HUMAN	51	8.58	Homo sapiens	0	0	0	0	0	0	0	0	0	0	0	0	0	0	0	0	0	0	0	0	0	0	0	0	0	0	0	0	0	0	0	0	0	0	0	0	0	0	0	0	0	0	0	0
102	Phosphatidylcholine-sterol acyltransferase OS=Homo sapiens GN=LCAT PE=1 SV=1	LCAT_HUMAN	50	6.04	Homo sapiens	0	0	0	0	0	0	0	0	0	0	0	0	0	0	0	0	0	0	0	0	0	0	0	0	0	0	0	0	0	0	0	0	0	0	0	0	0	0	0	0	0	0	0	0
103	Ig lambda chain V-III region LOI OS=Homo sapiens PE=1 SV=1	LV302_HUMAN	12	4.72	Homo sapiens	3	2	2	0	0	0	0	0	0	0	0	0	0	0	0	0.31	0.31	0.31	0	0	0	0	0	0	0	0	0	0	0	0	2	2	2	0	0	0	0	0	0	0	0	0	0	0
104	Actin, cytoplasmic 1 OS=Homo sapiens GN=ACTB PE=1 SV=1	ACTB_HUMAN (+1)	42	5.16	Homo sapiens	4	3	4	0	0	0	0	0	0	0	0	0	0	0	2	0.19	0.15	0.15	0	0	0	0	0	0	0	0	0	0	0	0.069	4	3	4	0	0	0	0	0	0	0	0	0	0	0
105	Inter-alpha-trypsin inhibitor heavy chain H4 OS=Homo sapiens GN=ITIH4 PE=1 SV=4	ITIH4_HUMAN	103	6.97	Homo sapiens	0	0	0	0	0	0	0	0	0	0	0	0	0	0	0	0	0	0	0	0	0	0	0	0	0	0	0	0	0	0	0	0	0	0	0	0	0	0	0	0	0	0	0	0
106	Apolipoprotein A-II OS=Homo sapiens GN=APOA2 PE=1 SV=1	APOA2_HUMAN	11	6.6	Homo sapiens	0	0	0	0	0	0	0	0	0	2	2	0	0	0	0	0	0	0	0	0	0	0	0	0	0.21	0.21	0	0	0	0	0	0	0	0	0	0	0	0	0	2	2	0	0	0
107	Mannan-binding lectin serine protease 1 OS=Homo sapiens GN=MASP1 PE=1 SV=3	MASP1_HUMAN	79	5.18	Homo sapiens	0	0	0	0	0	0	0	0	0	0	0	0	0	0	0	0	0	0	0	0	0	0	0	0	0	0	0	0	0	0	0	0	0	0	0	0	0	0	0	0	0	0	0	0
108	Ficolin-2 OS=Homo sapiens GN=FCN2 PE=1 SV=2	FCN2_HUMAN	34	6.77	Homo sapiens	0	0	0	0	0	0	5	2	3	0	0	0	0	0	0	0	0	0	0	0	0	0.11	0.073	0.11	0	0	0	0	0	0	0	0	0	0	0	0	4	2	3	0	0	0	0	0
109	Secreted phosphoprotein 24 OS=Homo sapiens GN=SPP2 PE=1 SV=1	SPP24_HUMAN	24	8.46	Homo sapiens	0	0	0	0	0	0	0	0	0	0	0	0	0	0	0	0	0	0	0	0	0	0	0	0	0	0	0	0	0	0	0	0	0	0	0	0	0	0	0	0	0	0	0	0
110	Complement component C8 gamma chain OS=Homo sapiens GN=C8G PE=1 SV=3	CO8G_HUMAN	22	8.48	Homo sapiens	0	0	0	0	0	0	0	0	0	0	0	0	0	0	0	0	0	0	0	0	0	0	0	0	0	0	0	0	0	0	0	0	0	0	0	0	0	0	0	0	0	0	0	0
111	Alpha-1B-glycoprotein OS=Homo sapiens GN=A1BG PE=1 SV=4	A1BG_HUMAN	54	5.71	Homo sapiens	0	0	0	0	0	0	0	0	0	0	0	0	0	0	0	0	0	0	0	0	0	0	0	0	0	0	0	0	0	0	0	0	0	0	0	0	0	0	0	0	0	0	0	0
112	Serum amyloid P-component OS=Homo sapiens GN=APCS PE=1 SV=2	SAMP_HUMAN	25	6.52	Homo sapiens	2	0	0	0	0	0	0	0	0	0	0	0	0	0	0	0.09	0	0	0	0	0	0	0	0	0	0	0	0	0	0	2	0	0	0	0	0	0	0	0	0	0	0	0	0
113	Protein S100-A9 OS=Homo sapiens GN=S100A9 PE=1 SV=1	S10A9_HUMAN	13	6.07	Homo sapiens	0	0	0	0	0	0	0	0	0	2	2	3	0	0	0	0	0	0	0	0	0	0	0	0	0.26	0.26	0.26	0	0	0	0	0	0	0	0	0	0	0	0	2	2	2	0	0
114	Tropomyosin alpha-4 chain OS=Homo sapiens GN=TPM4 PE=1 SV=3	TPM4_HUMAN	29	4.36	Homo sapiens	0	0	0	0	0	0	0	0	0	0	0	0	0	0	0	0	0	0	0	0	0	0	0	0	0	0	0	0	0	0	0	0	0	0	0	0	0	0	0	0	0	0	0	0
115	Ig kappa chain V-III region VG (Fragment) OS=Homo sapiens PE=1 SV=1	KV309_HUMAN	13	4.59	Homo sapiens	0	0	0	0	0	0	0	0	0	0	0	0	0	0	0	0	0	0	0	0	0	0	0	0	0	0	0	0	0	0	0	0	0	0	0	0	0	0	0	0	0	0	0	0
116	Complement component C8 beta chain OS=Homo sapiens GN=C8B PE=1 SV=3	CO8B_HUMAN	67	8.17	Homo sapiens	0	0	0	0	0	0	0	0	0	0	0	0	0	0	0	0	0	0	0	0	0	0	0	0	0	0	0	0	0	0	0	0	0	0	0	0	0	0	0	0	0	0	0	0
117	Ig heavy chain V-II region ARH-77 OS=Homo sapiens PE=4 SV=1	HV209_HUMAN	16	8.45	Homo sapiens	0	0	0	0	0	0	0	0	0	0	0	0	0	0	0	0	0	0	0	0	0	0	0	0	0	0	0	0	0	0	0	0	0	0	0	0	0	0	0	0	0	0	0	0
118	Ig lambda chain V-I region HA OS=Homo sapiens PE=1 SV=1	LV102_HUMAN	12	5.6	Homo sapiens	0	0	0	0	0	0	0	0	0	0	0	0	0	0	0	0	0	0	0	0	0	0	0	0	0	0	0	0	0	0	0	0	0	0	0	0	0	0	0	0	0	0	0	0
119	Complement C4-B OS=Homo sapiens GN=C4B PE=1 SV=2	CO4B_HUMAN	193	7.28	Homo sapiens	0	0	0	0	0	0	0	0	0	0	0	0	0	0	0	0	0	0	0	0	0	0	0	0	0	0	0	0	0	0	0	0	0	0	0	0	0	0	0	0	0	0	0	0
120	Alpha-2-antiplasmin OS=Homo sapiens GN=SERPINF2 PE=1 SV=3	A2AP_HUMAN	55	6.24	Homo sapiens	0	0	0	0	0	0	0	0	0	0	0	0	0	0	0	0	0	0	0	0	0	0	0	0	0	0	0	0	0	0	0	0	0	0	0	0	0	0	0	0	0	0	0	0
121	Ig lambda chain V-I region NIG-64 OS=Homo sapiens PE=1 SV=1	LV104_HUMAN	11	5.69	Homo sapiens	0	0	0	0	0	0	2	3	0	0	0	0	0	0	2	0	0	0	0	0	0	0.17	0.17	0	0	0	0	0	0	0.17	0	0	0	0	0	0	2	2	0	0	0	0	0	0
122	Ig heavy chain V-I region V35 OS=Homo sapiens PE=1 SV=1	HV103_HUMAN	13	9.87	Homo sapiens	0	0	0	0	0	0	0	0	0	0	0	0	0	0	0	0	0	0	0	0	0	0	0	0	0	0	0	0	0	0	0	0	0	0	0	0	0	0	0	0	0	0	0	0
123	Filaggrin OS=Homo sapiens GN=FLG PE=1 SV=3	FILA_HUMAN	435	9.6	Homo sapiens	0	0	0	0	0	0	3	2	2	0	0	0	0	0	0	0	0	0	0	0	0	0.013	0.0089	0.0089	0	0	0	0	0	0	0	0	0	0	0	0	3	2	2	0	0	0	0	0
124	Alpha-1-acid glycoprotein 2 OS=Homo sapiens GN=ORM2 PE=1 SV=2	A1AG2_HUMAN	24	4.76	Homo sapiens	0	0	0	0	0	0	0	0	0	0	0	0	0	0	0	0	0	0	0	0	0	0	0	0	0	0	0	0	0	0	0	0	0	0	0	0	0	0	0	0	0	0	0	0
125	Filaggrin-2 OS=Homo sapiens GN=FLG2 PE=1 SV=1	FILA2_HUMAN	248	8.35	Homo sapiens	0	0	0	2	0	2	2	4	3	0	0	0	0	0	0	0	0	0	0.013	0	0.013	0.013	0.022	0.013	0	0	0	0	0	0	0	0	0	2	0	2	2	4	2	0	0	0	0	0
126	Ig heavy chain V-III region GA OS=Homo sapiens PE=1 SV=1	HV308_HUMAN	13	10.02	Homo sapiens	0	2	2	0	0	0	0	0	0	0	0	0	0	0	0	0	0.25	0.25	0	0	0	0	0	0	0	0	0	0	0	0	0	2	2	0	0	0	0	0	0	0	0	0	0	0
127	Lumican OS=Homo sapiens GN=LUM PE=1 SV=2	LUM_HUMAN	38	6.6	Homo sapiens	0	0	0	0	0	0	0	0	0	0	0	0	0	0	0	0	0	0	0	0	0	0	0	0	0	0	0	0	0	0	0	0	0	0	0	0	0	0	0	0	0	0	0	0
128	Phosphatidylinositol-glycan-specific phospholipase D OS=Homo sapiens GN=GPLD1 PE=1 SV=3	PHLD_HUMAN	92	6.33	Homo sapiens	0	0	0	0	0	0	0	0	0	0	0	0	0	0	0	0	0	0	0	0	0	0	0	0	0	0	0	0	0	0	0	0	0	0	0	0	0	0	0	0	0	0	0	0
129	Antithrombin-III OS=Homo sapiens GN=SERPINC1 PE=1 SV=1	ANT3_HUMAN	53	6.68	Homo sapiens	0	0	0	0	0	0	0	0	0	0	0	0	0	0	0	0	0	0	0	0	0	0	0	0	0	0	0	0	0	0	0	0	0	0	0	0	0	0	0	0	0	0	0	0
130	Complement factor B OS=Homo sapiens GN=CFB PE=1 SV=2	CFAB_HUMAN	86	7.07	Homo sapiens	0	0	0	0	0	0	0	0	0	2	0	3	0	0	0	0	0	0	0	0	0	0	0	0	0.039	0	0.054	0	0	0	0	0	0	0	0	0	0	0	0	2	0	3	0	0
131	Ig lambda chain V-III region SH OS=Homo sapiens PE=1 SV=1	LV301_HUMAN	11	6.5	Homo sapiens	0	0	0	0	0	0	0	0	0	0	0	0	0	0	0	0	0	0	0	0	0	0	0	0	0	0	0	0	0	0	0	0	0	0	0	0	0	0	0	0	0	0	0	0
132	Desmoplakin OS=Homo sapiens GN=DSP PE=1 SV=3	DESP_HUMAN	332	6.78	Homo sapiens	0	0	0	0	0	0	2	0	0	0	0	0	0	0	0	0	0	0	0	0	0	0.007	0	0	0	0	0	0	0	0	0	0	0	0	0	0	2	0	0	0	0	0	0	0
133	Protein S100-A8 OS=Homo sapiens GN=S100A8 PE=1 SV=1	S10A8_HUMAN	11	7.07	Homo sapiens	0	0	0	0	0	0	3	0	0	3	4	2	0	0	0	0	0	0	0	0	0	0.31	0	0	0.24	0.31	0.24	0	0	0	0	0	0	0	0	0	3	0	0	2	3	2	0	0
134	Lysozyme C OS=Homo sapiens GN=LYZ PE=1 SV=1	LYSC_HUMAN	17	9.35	Homo sapiens	0	2	2	0	0	2	0	0	0	0	0	0	0	0	0	0	0.14	0.14	0	0	0.14	0	0	0	0	0	0	0	0	0	0	2	2	0	0	2	0	0	0	0	0	0	0	0
135	ATP synthase subunit beta, mitochondrial OS=Homo sapiens GN=ATP5B PE=1 SV=3	ATPB_HUMAN	57	5.07	Homo sapiens	0	2	0	0	0	0	0	0	0	0	0	0	0	0	0	0	0.047	0	0	0	0	0	0	0	0	0	0	0	0	0	0	2	0	0	0	0	0	0	0	0	0	0	0	0
136	Integrin beta-3 OS=Homo sapiens GN=ITGB3 PE=1 SV=2	ITB3_HUMAN	87	4.85	Homo sapiens	0	0	0	0	0	0	0	0	0	0	0	0	0	0	0	0	0	0	0	0	0	0	0	0	0	0	0	0	0	0	0	0	0	0	0	0	0	0	0	0	0	0	0	0
137	Small proline-rich protein 2A OS=Homo sapiens GN=SPRR2A PE=1 SV=1	SPR2A_HUMAN (+4)	8	8.49	Homo sapiens	2	2	2	0	0	0	2	0	0	2	2	0	0	0	0	0.31	0.31	0.31	0	0	0	0.31	0	0	0.31	0.31	0	0	0	0	2	2	2	0	0	0	2	0	0	2	2	0	0	0
138	Heat shock 70 kDa protein 1-like OS=Homo sapiens GN=HSPA1L PE=1 SV=2	HS71L_HUMAN	70	5.82	Homo sapiens	3	4	6	0	0	0	0	0	0	0	0	0	2	2	0	0.055	0.058	0.078	0	0	0	0	0	0	0	0	0	0.041	0.041	0	3	4	5	0	0	0	0	0	0	0	0	0	2	2
139	Ig kappa chain V-III region B6 OS=Homo sapiens PE=1 SV=1	KV301_HUMAN	12	9.53	Homo sapiens	0	0	0	0	0	0	0	0	0	0	0	0	0	0	0	0	0	0	0	0	0	0	0	0	0	0	0	0	0	0	0	0	0	0	0	0	0	0	0	0	0	0	0	0
140	Angiotensinogen OS=Homo sapiens GN=AGT PE=1 SV=1	ANGT_HUMAN	53	6.27	Homo sapiens	0	0	0	0	0	0	0	0	0	0	0	0	0	0	0	0	0	0	0	0	0	0	0	0	0	0	0	0	0	0	0	0	0	0	0	0	0	0	0	0	0	0	0	0
141	Complement component C6 OS=Homo sapiens GN=C6 PE=1 SV=3	CO6_HUMAN	105	6.74	Homo sapiens	0	0	0	0	0	0	0	0	0	0	0	0	0	0	0	0	0	0	0	0	0	0	0	0	0	0	0	0	0	0	0	0	0	0	0	0	0	0	0	0	0	0	0	0
142	Beta-Ala-His dipeptidase OS=Homo sapiens GN=CNDP1 PE=1 SV=4	CNDP1_HUMAN	57	4.95	Homo sapiens	0	0	0	0	0	0	0	0	0	0	0	0	0	0	0	0	0	0	0	0	0	0	0	0	0	0	0	0	0	0	0	0	0	0	0	0	0	0	0	0	0	0	0	0
143	Protein S100-A7 OS=Homo sapiens GN=S100A7 PE=1 SV=4	S10A7_HUMAN	11	6.78	Homo sapiens	0	0	0	0	0	0	0	0	0	2	2	0	0	0	0	0	0	0	0	0	0	0	0	0	0.22	0.22	0	0	0	0	0	0	0	0	0	0	0	0	0	2	2	0	0	0
144	Lipopolysaccharide-binding protein OS=Homo sapiens GN=LBP PE=1 SV=3	LBP_HUMAN	53	6.68	Homo sapiens	0	0	0	0	0	0	0	0	0	0	0	0	0	0	0	0	0	0	0	0	0	0	0	0	0	0	0	0	0	0	0	0	0	0	0	0	0	0	0	0	0	0	0	0
145	Gelsolin OS=Homo sapiens GN=GSN PE=1 SV=1	GELS_HUMAN	86	6.19	Homo sapiens	0	0	0	0	0	0	0	0	0	0	0	0	0	0	0	0	0	0	0	0	0	0	0	0	0	0	0	0	0	0	0	0	0	0	0	0	0	0	0	0	0	0	0	0
146	Calmodulin-like protein 5 OS=Homo sapiens GN=CALML5 PE=1 SV=2	CALL5_HUMAN	16	4.05	Homo sapiens	2	0	2	0	0	0	0	0	2	0	0	0	0	0	0	0.25	0	0.25	0	0	0	0	0	0.25	0	0	0	0	0	0	2	0	2	0	0	0	0	0	2	0	0	0	0	0
147	Calreticulin OS=Homo sapiens GN=CALR PE=1 SV=1	CALR_HUMAN	48	4.04	Homo sapiens	0	0	0	0	0	0	0	0	0	0	0	0	0	0	0	0	0	0	0	0	0	0	0	0	0	0	0	0	0	0	0	0	0	0	0	0	0	0	0	0	0	0	0	0
148	Trypsin-1 OS=Homo sapiens GN=PRSS1 PE=1 SV=1	TRY1_HUMAN	27	6.49	Homo sapiens	0	0	0	0	0	0	0	0	0	0	0	0	0	0	0	0	0	0	0	0	0	0	0	0	0	0	0	0	0	0	0	0	0	0	0	0	0	0	0	0	0	0	0	0
149	Phospholipid transfer protein OS=Homo sapiens GN=PLTP PE=1 SV=1	PLTP_HUMAN	55	7.01	Homo sapiens	0	0	0	0	0	0	0	0	0	0	0	0	0	0	0	0	0	0	0	0	0	0	0	0	0	0	0	0	0	0	0	0	0	0	0	0	0	0	0	0	0	0	0	0
150	Neutrophil defensin 1 OS=Homo sapiens GN=DEFA1 PE=1 SV=1	DEF1_HUMAN (+1)	10	7.04	Homo sapiens	0	0	0	0	0	0	0	0	0	0	0	0	0	0	0	0	0	0	0	0	0	0	0	0	0	0	0	0	0	0	0	0	0	0	0	0	0	0	0	0	0	0	0	0
151	Elongation factor 1-alpha 1 OS=Homo sapiens GN=EEF1A1 PE=1 SV=1	EF1A1_HUMAN (+2)	50	9.5	Homo sapiens	3	3	3	0	0	0	0	0	0	0	0	0	2	2	3	0.043	0.043	0.043	0	0	0	0	0	0	0	0	0	0.043	0.043	0.063	3	2	2	0	0	0	0	0	0	0	0	0	2	2
152	Extracellular superoxide dismutase [Cu-Zn] OS=Homo sapiens GN=SOD3 PE=1 SV=2	SODE_HUMAN	26	6.59	Homo sapiens	0	0	0	0	0	0	0	0	0	0	0	0	0	0	0	0	0	0	0	0	0	0	0	0	0	0	0	0	0	0	0	0	0	0	0	0	0	0	0	0	0	0	0	0
153	Serum paraoxonase/lactonase 3 OS=Homo sapiens GN=PON3 PE=1 SV=3	PON3_HUMAN	40	5.1	Homo sapiens	0	0	0	0	0	0	0	0	0	0	0	0	0	0	0	0	0	0	0	0	0	0	0	0	0	0	0	0	0	0	0	0	0	0	0	0	0	0	0	0	0	0	0	0
154	Ig kappa chain V-III region CLL OS=Homo sapiens PE=4 SV=2	KV308_HUMAN	14	8.7	Homo sapiens	0	0	0	0	0	0	0	0	0	0	0	0	0	0	0	0	0	0	0	0	0	0	0	0	0	0	0	0	0	0	0	0	0	0	0	0	0	0	0	0	0	0	0	0
155	Retinol-binding protein 4 OS=Homo sapiens GN=RBP4 PE=1 SV=3	RET4_HUMAN	23	5.85	Homo sapiens	0	0	0	0	0	0	0	0	0	0	0	0	0	0	0	0	0	0	0	0	0	0	0	0	0	0	0	0	0	0	0	0	0	0	0	0	0	0	0	0	0	0	0	0
156	Ig kappa chain V-III region IARC/BL41 OS=Homo sapiens PE=4 SV=1	KV311_HUMAN	14	4.59	Homo sapiens	0	0	0	0	0	0	0	0	0	0	0	0	0	0	0	0	0	0	0	0	0	0	0	0	0	0	0	0	0	0	0	0	0	0	0	0	0	0	0	0	0	0	0	0
157	Polymeric immunoglobulin receptor OS=Homo sapiens GN=PIGR PE=1 SV=4	PIGR_HUMAN	83	5.43	Homo sapiens	0	0	0	0	0	0	0	0	0	0	0	0	2	0	3	0	0	0	0	0	0	0	0	0	0	0	0	0.026	0	0.052	0	0	0	0	0	0	0	0	0	0	0	0	2	0
158	Resistin OS=Homo sapiens GN=RETN PE=2 SV=1	RETN_HUMAN	11	6.89	Homo sapiens	0	0	0	0	0	0	0	0	0	0	0	0	0	0	0	0	0	0	0	0	0	0	0	0	0	0	0	0	0	0	0	0	0	0	0	0	0	0	0	0	0	0	0	0
159	Complement factor H-related protein 1 OS=Homo sapiens GN=CFHR1 PE=1 SV=2	FHR1_HUMAN	38	7.42	Homo sapiens	0	0	0	0	0	0	0	0	0	0	0	0	0	0	0	0	0	0	0	0	0	0	0	0	0	0	0	0	0	0	0	0	0	0	0	0	0	0	0	0	0	0	0	0
160	Serum amyloid A-2 protein OS=Homo sapiens GN=SAA2 PE=1 SV=1	SAA2_HUMAN	14	9.48	Homo sapiens	0	0	0	0	0	0	0	0	0	0	0	0	0	0	0	0	0	0	0	0	0	0	0	0	0	0	0	0	0	0	0	0	0	0	0	0	0	0	0	0	0	0	0	0
161	Mannan-binding lectin serine protease 2 OS=Homo sapiens GN=MASP2 PE=1 SV=4	MASP2_HUMAN	76	5.37	Homo sapiens	0	0	0	0	0	0	0	0	0	0	0	0	0	0	0	0	0	0	0	0	0	0	0	0	0	0	0	0	0	0	0	0	0	0	0	0	0	0	0	0	0	0	0	0
162	Apolipoprotein C-I OS=Homo sapiens GN=APOC1 PE=1 SV=1	APOC1_HUMAN	9	9.17	Homo sapiens	0	0	0	0	0	0	0	0	0	0	0	0	0	0	0	0	0	0	0	0	0	0	0	0	0	0	0	0	0	0	0	0	0	0	0	0	0	0	0	0	0	0	0	0
163	Desmocollin-1 OS=Homo sapiens GN=DSC1 PE=1 SV=2	DSC1_HUMAN	100	5.08	Homo sapiens	0	2	0	2	0	2	0	0	0	0	0	0	0	0	0	0	0.032	0	0.032	0	0.032	0	0	0	0	0	0	0	0	0	0	2	0	2	0	2	0	0	0	0	0	0	0	0
164	Apolipoprotein F OS=Homo sapiens GN=APOF PE=1 SV=2	APOF_HUMAN	35	5.36	Homo sapiens	0	0	0	0	0	0	0	0	0	0	0	0	0	0	0	0	0	0	0	0	0	0	0	0	0	0	0	0	0	0	0	0	0	0	0	0	0	0	0	0	0	0	0	0
165	Ubiquitin-60S ribosomal protein L40 OS=Homo sapiens GN=UBA52 PE=1 SV=2	RL40_HUMAN (+3)	15	10.51	Homo sapiens	2	2	2	0	0	0	0	0	0	0	0	0	0	0	0	0.2	0.2	0.2	0	0	0	0	0	0	0	0	0	0	0	0	2	2	2	0	0	0	0	0	0	0	0	0	0	0
166	Hemoglobin subunit beta OS=Homo sapiens GN=HBB PE=1 SV=2	HBB_HUMAN	16	7.32	Homo sapiens	0	0	0	0	0	0	0	0	0	0	0	0	0	0	0	0	0	0	0	0	0	0	0	0	0	0	0	0	0	0	0	0	0	0	0	0	0	0	0	0	0	0	0	0
167	Ig heavy chain V-III region BUT OS=Homo sapiens PE=1 SV=1	HV306_HUMAN	12	9.48	Homo sapiens	0	0	0	0	0	0	0	0	0	0	0	0	0	0	0	0	0	0	0	0	0	0	0	0	0	0	0	0	0	0	0	0	0	0	0	0	0	0	0	0	0	0	0	0
168	Plasma protease C1 inhibitor OS=Homo sapiens GN=SERPING1 PE=1 SV=2	IC1_HUMAN	55	6.52	Homo sapiens	0	0	0	0	0	0	0	0	0	0	0	0	0	0	0	0	0	0	0	0	0	0	0	0	0	0	0	0	0	0	0	0	0	0	0	0	0	0	0	0	0	0	0	0
169	Hemoglobin subunit alpha OS=Homo sapiens GN=HBA1 PE=1 SV=2	HBA_HUMAN	15	9.09	Homo sapiens	0	0	0	0	0	0	0	0	0	0	0	0	0	0	0	0	0	0	0	0	0	0	0	0	0	0	0	0	0	0	0	0	0	0	0	0	0	0	0	0	0	0	0	0
170	Mannose-binding protein C OS=Homo sapiens GN=MBL2 PE=1 SV=2	MBL2_HUMAN	26	5.14	Homo sapiens	0	0	0	0	0	0	0	0	0	0	0	0	0	0	0	0	0	0	0	0	0	0	0	0	0	0	0	0	0	0	0	0	0	0	0	0	0	0	0	0	0	0	0	0
171	Desmoglein-1 OS=Homo sapiens GN=DSG1 PE=1 SV=2	DSG1_HUMAN	114	4.66	Homo sapiens	0	0	0	0	0	0	0	0	0	0	0	0	0	0	0	0	0	0	0	0	0	0	0	0	0	0	0	0	0	0	0	0	0	0	0	0	0	0	0	0	0	0	0	0
172	Erythrocyte band 7 integral membrane protein OS=Homo sapiens GN=STOM PE=1 SV=3	STOM_HUMAN	32	8.07	Homo sapiens	0	0	0	0	0	0	0	0	0	0	0	0	0	0	0	0	0	0	0	0	0	0	0	0	0	0	0	0	0	0	0	0	0	0	0	0	0	0	0	0	0	0	0	0
173	Collectin-11 OS=Homo sapiens GN=COLEC11 PE=1 SV=1	COL11_HUMAN	29	5.06	Homo sapiens	0	0	0	0	0	0	0	0	0	0	0	0	0	0	0	0	0	0	0	0	0	0	0	0	0	0	0	0	0	0	0	0	0	0	0	0	0	0	0	0	0	0	0	0
174	Coagulation factor XII OS=Homo sapiens GN=F12 PE=1 SV=3	FA12_HUMAN	68	7.76	Homo sapiens	0	0	0	0	0	0	0	0	0	0	0	0	0	0	0	0	0	0	0	0	0	0	0	0	0	0	0	0	0	0	0	0	0	0	0	0	0	0	0	0	0	0	0	0
175	Pigment epithelium-derived factor OS=Homo sapiens GN=SERPINF1 PE=1 SV=4	PEDF_HUMAN	46	6.33	Homo sapiens	0	0	0	0	0	0	0	0	0	0	0	0	0	0	0	0	0	0	0	0	0	0	0	0	0	0	0	0	0	0	0	0	0	0	0	0	0	0	0	0	0	0	0	0
176	Keratin, type II cytoskeletal 6C OS=Homo sapiens GN=KRT6C PE=1 SV=3	K2C6C_HUMAN	60	8.16	Homo sapiens	0	0	0	0	17	0	0	0	0	0	0	0	0	0	0	0	0	0	0	0.29	0	0	0	0	0	0	0	0	0	0	0	0	0	0	2	0	0	0	0	0	0	0	0	0
177	Adenosylhomocysteinase OS=Homo sapiens GN=AHCY PE=1 SV=4	SAHH_HUMAN	48	6.29	Homo sapiens	0	0	2	0	0	0	0	0	0	0	0	0	0	0	0	0	0	0.046	0	0	0	0	0	0	0	0	0	0	0	0	0	0	2	0	0	0	0	0	0	0	0	0	0	0
178	Zinc-alpha-2-glycoprotein OS=Homo sapiens GN=AZGP1 PE=1 SV=2	ZA2G_HUMAN	34	5.92	Homo sapiens	0	0	0	0	0	0	0	0	0	0	0	0	0	0	0	0	0	0	0	0	0	0	0	0	0	0	0	0	0	0	0	0	0	0	0	0	0	0	0	0	0	0	0	0
179	ATP synthase subunit alpha, mitochondrial OS=Homo sapiens GN=ATP5A1 PE=1 SV=1	ATPA_HUMAN	60	9.56	Homo sapiens	0	0	0	0	0	0	0	0	0	0	0	0	0	0	0	0	0	0	0	0	0	0	0	0	0	0	0	0	0	0	0	0	0	0	0	0	0	0	0	0	0	0	0	0
180	Complement factor I OS=Homo sapiens GN=CFI PE=1 SV=2	CFAI_HUMAN	66	7.53	Homo sapiens	0	0	0	0	0	0	0	0	0	0	0	0	0	0	0	0	0	0	0	0	0	0	0	0	0	0	0	0	0	0	0	0	0	0	0	0	0	0	0	0	0	0	0	0
181	Afamin OS=Homo sapiens GN=AFM PE=1 SV=1	AFAM_HUMAN	69	5.7	Homo sapiens	0	0	0	0	0	0	0	0	0	0	0	0	0	0	0	0	0	0	0	0	0	0	0	0	0	0	0	0	0	0	0	0	0	0	0	0	0	0	0	0	0	0	0	0
182	Junction plakoglobin OS=Homo sapiens GN=JUP PE=1 SV=3	PLAK_HUMAN	82	6.05	Homo sapiens	0	0	0	2	2	2	0	0	0	0	0	0	0	0	0	0	0	0	0.032	0.032	0.032	0	0	0	0	0	0	0	0	0	0	0	0	2	2	2	0	0	0	0	0	0	0	0
183	Plasma kallikrein OS=Homo sapiens GN=KLKB1 PE=1 SV=1	KLKB1_HUMAN	71	8.26	Homo sapiens	0	0	0	0	0	0	0	0	0	0	0	0	0	0	0	0	0	0	0	0	0	0	0	0	0	0	0	0	0	0	0	0	0	0	0	0	0	0	0	0	0	0	0	0
184	Collectin-10 OS=Homo sapiens GN=COLEC10 PE=2 SV=2	COL10_HUMAN	31	7.39	Homo sapiens	0	0	0	0	0	0	0	0	0	0	0	0	0	0	0	0	0	0	0	0	0	0	0	0	0	0	0	0	0	0	0	0	0	0	0	0	0	0	0	0	0	0	0	0
185	Suprabasin OS=Homo sapiens GN=SBSN PE=1 SV=2	SBSN_HUMAN	61	7.01	Homo sapiens	0	0	0	0	0	0	0	0	0	0	0	0	0	0	0	0	0	0	0	0	0	0	0	0	0	0	0	0	0	0	0	0	0	0	0	0	0	0	0	0	0	0	0	0
186	Serum amyloid A-4 protein OS=Homo sapiens GN=SAA4 PE=1 SV=2	SAA4_HUMAN	15	9.38	Homo sapiens	0	0	0	0	0	0	0	0	0	0	0	0	0	0	0	0	0	0	0	0	0	0	0	0	0	0	0	0	0	0	0	0	0	0	0	0	0	0	0	0	0	0	0	0
187	Aggrecan core protein OS=Homo sapiens GN=ACAN PE=1 SV=2	PGCA_HUMAN	250	3.82	Homo sapiens	0	0	0	0	0	0	0	0	0	0	0	0	0	0	0	0	0	0	0	0	0	0	0	0	0	0	0	0	0	0	0	0	0	0	0	0	0	0	0	0	0	0	0	0
188	Ig kappa chain V-I region Lay OS=Homo sapiens PE=1 SV=1	KV113_HUMAN	12	4.53	Homo sapiens	0	0	0	0	0	0	0	0	0	0	0	0	0	0	0	0	0	0	0	0	0	0	0	0	0	0	0	0	0	0	0	0	0	0	0	0	0	0	0	0	0	0	0	0
189	Endoplasmin OS=Homo sapiens GN=HSP90B1 PE=1 SV=1	ENPL_HUMAN	92	4.48	Homo sapiens	0	0	0	0	0	0	0	0	0	0	0	0	0	0	0	0	0	0	0	0	0	0	0	0	0	0	0	0	0	0	0	0	0	0	0	0	0	0	0	0	0	0	0	0
190	Coagulation factor VII OS=Homo sapiens GN=F7 PE=1 SV=1	FA7_HUMAN	52	7.23	Homo sapiens	0	0	0	0	0	0	0	0	0	0	0	0	0	0	0	0	0	0	0	0	0	0	0	0	0	0	0	0	0	0	0	0	0	0	0	0	0	0	0	0	0	0	0	0
191	Carboxypeptidase N catalytic chain OS=Homo sapiens GN=CPN1 PE=1 SV=1	CBPN_HUMAN	52	7.36	Homo sapiens	0	0	0	0	0	0	0	0	0	0	0	0	0	0	0	0	0	0	0	0	0	0	0	0	0	0	0	0	0	0	0	0	0	0	0	0	0	0	0	0	0	0	0	0
192	Glutathione peroxidase 3 OS=Homo sapiens GN=GPX3 PE=1 SV=2	GPX3_HUMAN	26	8.29	Homo sapiens	0	0	0	0	0	0	0	0	0	0	0	0	0	0	0	0	0	0	0	0	0	0	0	0	0	0	0	0	0	0	0	0	0	0	0	0	0	0	0	0	0	0	0	0
193	Glyceraldehyde-3-phosphate dehydrogenase OS=Homo sapiens GN=GAPDH PE=1 SV=3	G3P_HUMAN	36	8.73	Homo sapiens	0	2	3	0	0	0	0	0	0	0	0	0	0	0	0	0	0.12	0.12	0	0	0	0	0	0	0	0	0	0	0	0	0	2	2	0	0	0	0	0	0	0	0	0	0	0
194	Myosin-9 OS=Homo sapiens GN=MYH9 PE=1 SV=4	MYH9_HUMAN	227	5.29	Homo sapiens	0	0	0	0	0	0	0	0	0	0	0	0	0	0	0	0	0	0	0	0	0	0	0	0	0	0	0	0	0	0	0	0	0	0	0	0	0	0	0	0	0	0	0	0
195	Tetranectin OS=Homo sapiens GN=CLEC3B PE=1 SV=3	TETN_HUMAN	23	5.36	Homo sapiens	0	0	0	0	0	0	0	0	0	0	0	0	0	0	0	0	0	0	0	0	0	0	0	0	0	0	0	0	0	0	0	0	0	0	0	0	0	0	0	0	0	0	0	0
196	GTP-binding nuclear protein Ran OS=Homo sapiens GN=RAN PE=1 SV=3	RAN_HUMAN	24	7.59	Homo sapiens	0	2	0	0	0	0	0	0	0	0	0	0	0	0	0	0	0.13	0	0	0	0	0	0	0	0	0	0	0	0	0	0	2	0	0	0	0	0	0	0	0	0	0	0	0
197	40S ribosomal protein S13 OS=Homo sapiens GN=RPS13 PE=1 SV=2	RS13_HUMAN	17	11.19	Homo sapiens	2	2	0	0	0	0	0	0	0	0	0	0	0	0	0	0.086	0.086	0	0	0	0	0	0	0	0	0	0	0	0	0	2	2	0	0	0	0	0	0	0	0	0	0	0	0
198	Cartilage acidic protein 1 OS=Homo sapiens GN=CRTAC1 PE=1 SV=2	CRAC1_HUMAN	71	4.73	Homo sapiens	0	0	0	0	0	0	0	0	0	0	0	0	0	0	0	0	0	0	0	0	0	0	0	0	0	0	0	0	0	0	0	0	0	0	0	0	0	0	0	0	0	0	0	0
199	Sodium-dependent phosphate transporter 2 OS=Homo sapiens GN=SLC20A2 PE=1 SV=1	S20A2_HUMAN	70	6.09	Homo sapiens	0	0	0	0	0	0	0	0	0	0	0	0	2	0	0	0	0	0	0	0	0	0	0	0	0	0	0	0	0	0	0	0	0	0	0	0	0	0	0	0	0	0	2	0
200	Platelet glycoprotein Ib alpha chain OS=Homo sapiens GN=GP1BA PE=1 SV=2	GP1BA_HUMAN	72	6.24	Homo sapiens	0	0	0	0	0	0	0	0	0	0	0	0	0	0	0	0	0	0	0	0	0	0	0	0	0	0	0	0	0	0	0	0	0	0	0	0	0	0	0	0	0	0	0	0
[truncated: 134 more columns]

## Sheet: RPA
						CHOL
Brain tumor						Spectral counts															Spectral counts / MW															RPA%
						CHOL_A			CHOL_B			CHOL_C			CHOL_D			CHOL_E																		18.5071	17.8808	17.5861	16.4535	15.6938	15.3161	14.8026	14.5416	14.2686	11.5681	11.6084	11.1772	12.1122	10.2937
#	Identified Proteins (200)	Accession Number	Molecular Weight	pI	Taxonomy	2016-11-16_CHOLPC_lungCancer_A_01	2016-11-16_CHOLPC_lungCancer_A_02	2016-11-16_CHOLPC_lungCancer_A_03	2016-11-16_CHOLPC_lungCancer_B_01	2016-11-16_CHOLPC_lungCancer_B_02	2016-11-16_CHOLPC_lungCancer_B_03	2016-11-16_CHOLPC_lungCancer_C_01	2016-11-16_CHOLPC_lungCancer_C_02	2016-11-16_CHOLPC_lungCancer_C_03	2016-11-16_CHOLPC_lungCancer_D_01	2016-11-16_CHOLPC_lungCancer_D_02	2016-11-16_CHOLPC_lungCancer_D_03	2016-11-16_CHOLPC_lungCancer_E_01	2016-11-16_CHOLPC_lungCancer_E_02	2016-11-16_CHOLPC_lungCancer_E_03	2016-11-16_CHOLPC_BrainCancer_A_01	2016-11-16_CHOLPC_BrainCancer_A_02	2016-11-16_CHOLPC_BrainCancer_A_03	2016-11-16_CHOLPC_BrainCancer_B_01	2016-11-16_CHOLPC_BrainCancer_B_02	2016-11-16_CHOLPC_BrainCancer_B_03	2016-11-16_CHOLPC_BrainCancer_C_01	2016-11-16_CHOLPC_BrainCancer_C_02	2016-11-16_CHOLPC_BrainCancer_C_03	2016-11-16_CHOLPC_BrainCancer_D_01	2016-11-16_CHOLPC_BrainCancer_D_02	2016-11-16_CHOLPC_BrainCancer_D_03	2016-11-16_CHOLPC_BrainCancer_E_01	2016-11-16_CHOLPC_BrainCancer_E_02	2016-11-16_CHOLPC_BrainCancer_E_03	2016-11-16_CHOLPC_BrainCancer_A_01	2016-11-16_CHOLPC_BrainCancer_A_02	2016-11-16_CHOLPC_BrainCancer_A_03	2016-11-16_CHOLPC_BrainCancer_B_01	2016-11-16_CHOLPC_BrainCancer_B_02	2016-11-16_CHOLPC_BrainCancer_B_03	2016-11-16_CHOLPC_BrainCancer_C_01	2016-11-16_CHOLPC_BrainCancer_C_02	2016-11-16_CHOLPC_BrainCancer_C_03	2016-11-16_CHOLPC_BrainCancer_D_01	2016-11-16_CHOLPC_BrainCancer_D_02	2016-11-16_CHOLPC_BrainCancer_D_03	2016-11-16_CHOLPC_BrainCancer_E_01	2016-11-16_CHOLPC_BrainCancer_E_02
1	Apolipoprotein B-100 OS=Homo sapiens GN=APOB PE=1 SV=2	APOB_HUMAN	516	7.04	Homo sapiens	41	38	39	67	63	57	13	14	12	21	25	28	22	21	28	0.0794574	0.0736434	0.0755814	0.129845	0.122093	0.110465	0.0251938	0.0271318	0.0232558	0.0406977	0.0484496	0.0542636	0.0426357	0.0406977	0.0542636	0.00429334	0.00411857	0.0042978	0.00789164	0.00777972	0.00721235	0.00170198	0.0018658	0.00162986	0.00351809	0.00417365	0.00485485	0.00352007	0.00395365
2	Ig gamma-1 chain C region OS=Homo sapiens GN=IGHG1 PE=1 SV=1	IGHG1_HUMAN	36	8.31	Homo sapiens	50	56	48	63	64	63	41	44	43	32	37	37	46	44	47	1.38889	1.55556	1.33333	1.75	1.77778	1.75	1.13889	1.22222	1.19444	0.888889	1.02778	1.02778	1.27778	1.22222	1.30556	0.0750462	0.0869958	0.0758176	0.10636	0.113279	0.114259	0.0769383	0.08405	0.0837116	0.0768396	0.0885371	0.0919531	0.105495	0.118735
3	Complement C3 OS=Homo sapiens GN=C3 PE=1 SV=2	CO3_HUMAN	187	6.34	Homo sapiens	38	32	34	39	32	28	17	17	15	22	22	19	33	30	32	0.203209	0.171123	0.181818	0.208556	0.171123	0.149733	0.0909091	0.0909091	0.0802139	0.117647	0.117647	0.101604	0.176471	0.160428	0.171123	0.01098	0.0095702	0.0103388	0.0126755	0.0109039	0.00977615	0.00614141	0.00625165	0.00562172	0.01017	0.0101346	0.00909032	0.0145697	0.015585
4	Serum albumin OS=Homo sapiens GN=ALB PE=1 SV=2	ALBU_HUMAN	69	6.21	Homo sapiens	34	37	36	26	29	28	23	21	23	79	68	77	36	40	40	0.492754	0.536232	0.521739	0.376812	0.42029	0.405797	0.333333	0.304348	0.333333	1.14493	0.985507	1.11594	0.521739	0.57971	0.57971	0.0266251	0.0299892	0.0296678	0.0229016	0.0267807	0.0264948	0.0225185	0.0209294	0.0233614	0.0989728	0.0848958	0.099841	0.0430756	0.056317
5	Ig mu chain C region OS=Homo sapiens GN=IGHM PE=1 SV=3	IGHM_HUMAN	49	6.77	Homo sapiens	34	30	29	34	36	36	62	68	66	15	16	16	50	42	49	0.693878	0.612245	0.591837	0.693878	0.734694	0.734694	1.26531	1.38776	1.34694	0.306122	0.326531	0.326531	1.02041	0.857143	1	0.0374925	0.0342403	0.0336537	0.0421721	0.0468144	0.0479687	0.0854784	0.0954334	0.094399	0.0264626	0.0281287	0.029214	0.0842465	0.0832686
6	C4b-binding protein alpha chain OS=Homo sapiens GN=C4BPA PE=1 SV=2	C4BPA_HUMAN	67	7.31	Homo sapiens	20	16	19	13	16	14	14	11	11	3	4	5	49	45	41	0.298507	0.238806	0.283582	0.19403	0.238806	0.208955	0.208955	0.164179	0.164179	0.0447761	0.0597015	0.0746269	0.731343	0.671642	0.61194	0.0161293	0.0133554	0.0161254	0.0117926	0.0152166	0.0136428	0.0141161	0.0112903	0.0115063	0.00387065	0.00514294	0.00667671	0.0603809	0.0652478
7	Vitronectin OS=Homo sapiens GN=VTN PE=1 SV=1	VTNC_HUMAN	54	5.54	Homo sapiens	57	21	10	8	4	5	0	0	0	3	0	0	4	3	4	1.05556	0.388889	0.185185	0.148148	0.0740741	0.0925926	0	0	0	0.0555556	0	0	0.0740741	0.0555556	0.0740741	0.0570351	0.0217489	0.0105302	0.00900406	0.00471997	0.00604544	0	0	0	0.00480248	0	0	0.00611567	0.00539704
8	Keratin, type II cytoskeletal 1 OS=Homo sapiens GN=KRT1 PE=1 SV=6	K2C1_HUMAN	66	8.33	Homo sapiens	37	44	43	53	42	42	44	50	51	37	37	34	20	20	20	0.560606	0.666667	0.651515	0.80303	0.636364	0.636364	0.666667	0.757576	0.772727	0.560606	0.560606	0.515152	0.30303	0.30303	0.30303	0.0302914	0.0372839	0.0370472	0.0488061	0.0405488	0.0415487	0.045037	0.0520971	0.0541559	0.0484614	0.048293	0.0460895	0.0250187	0.0294384
9	Ig kappa chain C region OS=Homo sapiens GN=IGKC PE=1 SV=1	IGKC_HUMAN	12	5.68	Homo sapiens	20	18	23	20	16	16	26	24	27	16	16	20	15	10	13	1.66667	1.5	1.91667	1.66667	1.33333	1.33333	2.16667	2	2.25	1.33333	1.33333	1.66667	1.25	0.833333	1.08333	0.0900555	0.0838888	0.108988	0.101296	0.0849595	0.0870543	0.14637	0.137536	0.157689	0.115259	0.114859	0.149113	0.103202	0.0809556
10	Complement C4-A OS=Homo sapiens GN=C4A PE=1 SV=2	CO4A_HUMAN	193	7.08	Homo sapiens	17	14	11	10	9	9	7	6	8	5	8	6	13	13	10	0.0880829	0.0725389	0.0569948	0.0518135	0.0466321	0.0466321	0.0362694	0.0310881	0.0414508	0.0259067	0.0414508	0.0310881	0.0673575	0.0673575	0.0518135	0.00475941	0.0040568	0.00324091	0.00314909	0.00297138	0.00304465	0.0024502	0.00213787	0.00290504	0.0022395	0.00357075	0.00278138	0.00556114	0.00654356
11	Complement factor H OS=Homo sapiens GN=CFH PE=1 SV=4	CFAH_HUMAN	139	6.59	Homo sapiens	34	31	31	12	16	17	9	10	9	10	12	12	22	19	17	0.244604	0.223022	0.223022	0.0863309	0.115108	0.122302	0.0647482	0.0719424	0.0647482	0.0719424	0.0863309	0.0863309	0.158273	0.136691	0.122302	0.0132168	0.0124727	0.0126817	0.00524697	0.00733463	0.0079852	0.0043741	0.00494735	0.00453782	0.00621903	0.00743691	0.00772384	0.0130673	0.0132791
12	Keratin, type I cytoskeletal 9 OS=Homo sapiens GN=KRT9 PE=1 SV=3	K1C9_HUMAN	62	4.89	Homo sapiens	30	34	44	38	34	35	29	28	24	20	19	19	12	12	13	0.483871	0.548387	0.709677	0.612903	0.548387	0.564516	0.467742	0.451613	0.387097	0.322581	0.306452	0.306452	0.193548	0.193548	0.209677	0.0261451	0.030669	0.0403545	0.0372507	0.034943	0.0368577	0.0315986	0.0310566	0.0271293	0.0278853	0.026399	0.0274176	0.0159797	0.0188026
13	Fibrinogen beta chain OS=Homo sapiens GN=FGB PE=1 SV=2	FIBB_HUMAN	56	8.38	Homo sapiens	6	8	7	8	6	5	0	0	0	7	6	7	5	5	4	0.107143	0.142857	0.125	0.142857	0.107143	0.0892857	0	0	0	0.125	0.107143	0.125	0.0892857	0.0892857	0.0714286	0.00578928	0.00798941	0.0071079	0.00868249	0.0068271	0.00582953	0	0	0	0.0108056	0.00922974	0.0111835	0.00737157	0.00867382
14	Ig lambda-3 chain C regions OS=Homo sapiens GN=IGLC3 PE=1 SV=1	LAC3_HUMAN	11	7.34	Homo sapiens	17	17	17	15	16	18	14	18	20	16	15	15	17	17	16	1.54545	1.54545	1.54545	1.36364	1.45455	1.63636	1.27273	1.63636	1.81818	1.45455	1.36364	1.36364	1.54545	1.54545	1.45455	0.083506	0.0864309	0.0878795	0.0828783	0.0926831	0.106839	0.0859798	0.11253	0.127426	0.125738	0.117469	0.122002	0.127595	0.150136
15	Alpha-2-macroglobulin OS=Homo sapiens GN=A2M PE=1 SV=3	A2MG_HUMAN	163	6.43	Homo sapiens	12	11	13	14	16	14	14	13	12	12	17	17	11	14	10	0.0736196	0.0674847	0.0797546	0.0858896	0.0981595	0.0858896	0.0858896	0.0797546	0.0736196	0.0736196	0.104294	0.104294	0.0674847	0.0858896	0.0613497	0.00397791	0.00377414	0.0045351	0.00522015	0.00625469	0.00560779	0.00580232	0.00548458	0.00515957	0.00636402	0.00898437	0.009331	0.00557164	0.00834389
16	Ig gamma-3 chain C region OS=Homo sapiens GN=IGHG3 PE=1 SV=2	IGHG3_HUMAN	41	7.95	Homo sapiens	43	44	38	37	45	40	26	23	23	20	25	20	37	34	35	1.04878	1.07317	0.926829	0.902439	1.09756	0.97561	0.634146	0.560976	0.560976	0.487805	0.609756	0.487805	0.902439	0.829268	0.853659	0.0566691	0.060018	0.0527025	0.0548479	0.0699362	0.0636983	0.0428401	0.0385773	0.0393155	0.0421681	0.052527	0.0436429	0.0745068	0.0805607
17	Prothrombin OS=Homo sapiens GN=F2 PE=1 SV=2	THRB_HUMAN	70	5.7	Homo sapiens	6	5	4	0	0	0	0	0	0	0	0	0	0	0	0	0.0857143	0.0714286	0.0571429	0	0	0	0	0	0	0	0	0	0	0	0	0.00463142	0.0039947	0.00324933	0	0	0	0	0	0	0	0	0	0	0
18	Keratin, type I cytoskeletal 10 OS=Homo sapiens GN=KRT10 PE=1 SV=6	K1C10_HUMAN	59	4.88	Homo sapiens	23	23	20	20	25	23	25	31	27	14	18	13	4	7	7	0.389831	0.389831	0.338983	0.338983	0.423729	0.389831	0.423729	0.525424	0.457627	0.237288	0.305085	0.220339	0.0677966	0.118644	0.118644	0.0210638	0.0218016	0.0192757	0.0206025	0.0269998	0.0254523	0.0286252	0.0361324	0.0320724	0.0205123	0.0262813	0.0197133	0.0055974	0.0115259
19	Haptoglobin OS=Homo sapiens GN=HP PE=1 SV=1	HPT_HUMAN	45	6.56	Homo sapiens	9	8	12	12	9	7	7	3	3	15	16	11	4	2	0	0.2	0.177778	0.266667	0.266667	0.2	0.155556	0.155556	0.0666667	0.0666667	0.333333	0.355556	0.244444	0.0888889	0.0444444	0	0.0108067	0.00994237	0.0151635	0.0162073	0.0127439	0.0101563	0.0105086	0.00458454	0.00467227	0.0288149	0.0306291	0.0218699	0.00733881	0.00431763
20	Apolipoprotein D OS=Homo sapiens GN=APOD PE=1 SV=1	APOD_HUMAN	21	4.79	Homo sapiens	9	10	8	15	15	16	7	9	8	8	8	9	8	8	10	0.428571	0.47619	0.380952	0.714286	0.714286	0.761905	0.333333	0.428571	0.380952	0.380952	0.380952	0.428571	0.380952	0.380952	0.47619	0.0231571	0.0266314	0.0216622	0.0434124	0.045514	0.0497453	0.0225185	0.0294721	0.0266987	0.0329313	0.0328168	0.0383434	0.031452	0.0370083
21	Inter-alpha-trypsin inhibitor heavy chain H2 OS=Homo sapiens GN=ITIH2 PE=1 SV=2	ITIH2_HUMAN	106	6.85	Homo sapiens	0	0	2	0	0	0	0	0	0	0	0	0	0	0	0	0	0	0.0188679	0	0	0	0	0	0	0	0	0	0	0	0	0	0	0.00107289	0	0	0	0	0	0	0	0	0	0	0
22	Fibrinogen gamma chain OS=Homo sapiens GN=FGG PE=1 SV=3	FIBG_HUMAN	52	5.32	Homo sapiens	6	5	6	2	4	4	0	0	0	4	5	5	6	5	4	0.115385	0.0961538	0.115385	0.0384615	0.0769231	0.0769231	0	0	0	0.0769231	0.0961538	0.0961538	0.115385	0.0961538	0.0769231	0.00623461	0.00537749	0.00656114	0.00233759	0.00490151	0.00502236	0	0	0	0.00664958	0.0082831	0.00860268	0.00952634	0.00934103
23	Serotransferrin OS=Homo sapiens GN=TF PE=1 SV=3	TRFE_HUMAN	77	7.13	Homo sapiens	4	4	3	4	3	3	3	0	3	22	22	26	11	9	9	0.0519481	0.0519481	0.038961	0.0519481	0.038961	0.038961	0.038961	0	0.038961	0.285714	0.285714	0.337662	0.142857	0.116883	0.116883	0.00280692	0.00290524	0.00221545	0.00315727	0.00248258	0.00254379	0.00263203	0	0.00273055	0.0246985	0.0246126	0.0302099	0.0117945	0.0113548
24	Hyaluronan-binding protein 2 OS=Homo sapiens GN=HABP2 PE=1 SV=1	HABP2_HUMAN	63	6.52	Homo sapiens	0	0	3	0	0	0	0	0	0	0	0	0	0	0	0	0	0	0.047619	0	0	0	0	0	0	0	0	0	0	0	0	0	0	0.00270777	0	0	0	0	0	0	0	0	0	0	0
25	CD5 antigen-like OS=Homo sapiens GN=CD5L PE=1 SV=1	CD5L_HUMAN	38	5.15	Homo sapiens	10	9	9	10	10	9	19	16	17	5	7	5	15	13	15	0.263158	0.236842	0.236842	0.263158	0.263158	0.236842	0.5	0.421053	0.447368	0.131579	0.184211	0.131579	0.394737	0.342105	0.394737	0.0142193	0.0132456	0.0134676	0.0159941	0.0167683	0.0154636	0.0337778	0.028955	0.0313534	0.0113743	0.0158687	0.0117721	0.0325901	0.0332344
26	Inter-alpha-trypsin inhibitor heavy chain H1 OS=Homo sapiens GN=ITIH1 PE=1 SV=3	ITIH1_HUMAN	101	6.78	Homo sapiens	0	0	0	0	0	0	0	0	0	0	0	0	0	0	0	0	0	0	0	0	0	0	0	0	0	0	0	0	0	0	0	0	0	0	0	0	0	0	0	0	0	0	0	0
27	Ig gamma-2 chain C region OS=Homo sapiens GN=IGHG2 PE=1 SV=2	IGHG2_HUMAN	36	7.66	Homo sapiens	43	42	0	39	41	36	0	0	0	0	0	0	30	0	0	1.19444	1.16667	0	1.08333	1.13889	1	0	0	0	0	0	0	0.833333	0	0	0.0645398	0.0652468	0	0.0658422	0.0725696	0.0652907	0	0	0	0	0	0	0.0688013	0
28	Apolipoprotein A-I OS=Homo sapiens GN=APOA1 PE=1 SV=1	APOA1_HUMAN	31	5.5	Homo sapiens	5	7	6	2	0	3	6	4	4	11	12	11	0	0	0	0.16129	0.225806	0.193548	0.0645161	0	0.0967742	0.193548	0.129032	0.129032	0.354839	0.387097	0.354839	0	0	0	0.00871505	0.0126284	0.0110058	0.00392112	0	0.00631846	0.0130753	0.00887331	0.00904311	0.0306739	0.0333462	0.0317467	0	0
29	Keratin, type II cytoskeletal 2 epidermal OS=Homo sapiens GN=KRT2 PE=1 SV=2	K22E_HUMAN	65	8.17	Homo sapiens	19	19	20	19	14	16	21	23	26	12	11	9	8	6	10	0.292308	0.292308	0.307692	0.292308	0.215385	0.246154	0.323077	0.353846	0.4	0.184615	0.169231	0.138462	0.123077	0.0923077	0.153846	0.0157943	0.0163476	0.0174964	0.0177657	0.0137242	0.0160716	0.0218256	0.0243333	0.0280336	0.015959	0.0145783	0.0123879	0.0101614	0.00896739
30	Serum paraoxonase/arylesterase 1 OS=Homo sapiens GN=PON1 PE=1 SV=3	PON1_HUMAN	40	4.89	Homo sapiens	2	2	2	0	0	0	0	0	0	0	0	0	0	0	0	0.05	0.05	0.05	0	0	0	0	0	0	0	0	0	0	0	0	0.00270166	0.00279629	0.00284316	0	0	0	0	0	0	0	0	0	0	0
31	Plasminogen OS=Homo sapiens GN=PLG PE=1 SV=2	PLMN_HUMAN	91	7.25	Homo sapiens	3	5	3	4	0	0	0	0	0	0	0	0	0	0	0	0.032967	0.0549451	0.032967	0.043956	0	0	0	0	0	0	0	0	0	0	0	0.00178132	0.00307285	0.00187461	0.00267153	0	0	0	0	0	0	0	0	0	0
32	Hornerin OS=Homo sapiens GN=HRNR PE=1 SV=2	HORN_HUMAN	282	10.24	Homo sapiens	22	22	16	7	12	10	11	11	9	9	8	11	0	0	0	0.0780142	0.0780142	0.0567376	0.0248227	0.0425532	0.035461	0.0390071	0.0390071	0.0319149	0.0319149	0.0283688	0.0390071	0	0	0	0.00421536	0.00436301	0.00322628	0.00150866	0.00271147	0.00231527	0.00263515	0.00268245	0.00223673	0.00275887	0.00244381	0.00348988	0	0
33	Vitamin K-dependent protein S OS=Homo sapiens GN=PROS1 PE=1 SV=1	PROS_HUMAN	75	5.37	Homo sapiens	0	0	0	0	0	0	0	0	0	0	0	0	0	0	0	0	0	0	0	0	0	0	0	0	0	0	0	0	0	0	0	0	0	0	0	0	0	0	0	0	0	0	0	0
34	Keratin, type I cytoskeletal 16 OS=Homo sapiens GN=KRT16 PE=1 SV=4	K1C16_HUMAN	51	4.69	Homo sapiens	11	16	15	30	24	26	11	14	14	8	5	0	2	4	5	0.215686	0.313725	0.294118	0.588235	0.470588	0.509804	0.215686	0.27451	0.27451	0.156863	0.0980392	0	0.0392157	0.0784314	0.0980392	0.0116542	0.0175454	0.0167245	0.0357514	0.0299857	0.0332855	0.0145708	0.0188775	0.0192388	0.0135599	0.00844551	0	0.00323771	0.00761935
35	Ceruloplasmin OS=Homo sapiens GN=CP PE=1 SV=1	CERU_HUMAN	122	5.5	Homo sapiens	0	0	0	0	0	0	0	0	0	3	0	0	0	0	0	0	0	0	0	0	0	0	0	0	0.0245902	0	0	0	0	0	0	0	0	0	0	0	0	0	0	0.00212569	0	0	0	0
36	Alpha-1-antitrypsin OS=Homo sapiens GN=SERPINA1 PE=1 SV=3	A1AT_HUMAN	47	5.31	Homo sapiens	0	0	0	2	0	2	0	0	0	12	12	15	0	0	0	0	0	0	0.0425532	0	0.0425532	0	0	0	0.255319	0.255319	0.319149	0	0	0	0	0	0	0.00258627	0	0.00277833	0	0	0	0.022071	0.0219943	0.0285536	0	0
37	Cartilage oligomeric matrix protein OS=Homo sapiens GN=COMP PE=1 SV=2	COMP_HUMAN	83	4.16	Homo sapiens	0	0	0	0	0	0	0	0	0	0	0	0	0	0	0	0	0	0	0	0	0	0	0	0	0	0	0	0	0	0	0	0	0	0	0	0	0	0	0	0	0	0	0	0
38	Fibronectin OS=Homo sapiens GN=FN1 PE=1 SV=4	FINC_HUMAN	263	5.45	Homo sapiens	0	0	0	0	0	0	0	0	0	0	0	0	0	0	0	0	0	0	0	0	0	0	0	0	0	0	0	0	0	0	0	0	0	0	0	0	0	0	0	0	0	0	0	0
39	Complement C5 OS=Homo sapiens GN=C5 PE=1 SV=4	CO5_HUMAN	188	6.49	Homo sapiens	3	4	4	3	0	3	0	0	0	0	0	0	0	0	0	0.0159574	0.0212766	0.0212766	0.0159574	0	0.0159574	0	0	0	0	0	0	0	0	0	0.000862233	0.00118991	0.00120986	0.000969852	0	0.00104187	0	0	0	0	0	0	0	0
40	Apolipoprotein E OS=Homo sapiens GN=APOE PE=1 SV=1	APOE_HUMAN	36	5.42	Homo sapiens	3	3	3	0	0	0	0	0	0	0	0	0	0	0	0	0.0833333	0.0833333	0.0833333	0	0	0	0	0	0	0	0	0	0	0	0	0.00450277	0.00466049	0.0047386	0	0	0	0	0	0	0	0	0	0	0
41	Fibrinogen alpha chain OS=Homo sapiens GN=FGA PE=1 SV=2	FIBA_HUMAN	95	5.87	Homo sapiens	4	2	3	2	0	2	0	0	0	9	6	8	3	3	3	0.0421053	0.0210526	0.0315789	0.0210526	0	0.0210526	0	0	0	0.0947368	0.0631579	0.0842105	0.0315789	0.0315789	0.0315789	0.00227509	0.00117739	0.00179568	0.00127952	0	0.00137454	0	0	0	0.00818949	0.00544069	0.00753414	0.00260721	0.00306779
42	Keratin, type II cytoskeletal 6A OS=Homo sapiens GN=KRT6A PE=1 SV=3	K2C6A_HUMAN	60	8.16	Homo sapiens	15	11	15	20	16	17	12	11	14	7	5	0	7	4	5	0.25	0.183333	0.25	0.333333	0.266667	0.283333	0.2	0.183333	0.233333	0.116667	0.0833333	0	0.116667	0.0666667	0.0833333	0.0135083	0.0102531	0.0142158	0.0202591	0.0169919	0.018499	0.0135111	0.0126075	0.016353	0.0100852	0.00717869	0	0.00963219	0.00647645
43	Immunoglobulin lambda-like polypeptide 5 OS=Homo sapiens GN=IGLL5 PE=2 SV=2	IGLL5_HUMAN	23	9.05	Homo sapiens	14	11	11	6	7	8	6	0	0	0	0	0	5	0	7	0.608696	0.478261	0.478261	0.26087	0.304348	0.347826	0.26087	0	0	0	0	0	0.217391	0	0.304348	0.0328898	0.0267471	0.0271954	0.015855	0.0193929	0.0227098	0.0176232	0	0	0	0	0	0.0179482	0
44	Ig alpha-1 chain C region OS=Homo sapiens GN=IGHA1 PE=1 SV=2	IGHA1_HUMAN	38	6.49	Homo sapiens	5	3	5	6	4	4	2	3	2	5	4	3	2	0	2	0.131579	0.0789474	0.131579	0.157895	0.105263	0.105263	0.0526316	0.0789474	0.0526316	0.131579	0.105263	0.0789474	0.0526316	0	0.0526316	0.00710964	0.0044152	0.007482	0.00959643	0.00670733	0.00687271	0.00355556	0.00542906	0.00368864	0.0113743	0.00906781	0.00706325	0.00434535	0
45	Complement C1q subcomponent subunit C OS=Homo sapiens GN=C1QC PE=1 SV=3	C1QC_HUMAN	26	8.58	Homo sapiens	7	4	5	5	5	4	7	6	6	0	0	0	4	4	3	0.269231	0.153846	0.192308	0.192308	0.192308	0.153846	0.269231	0.230769	0.230769	0	0	0	0.153846	0.153846	0.115385	0.0145474	0.00860398	0.0109352	0.011688	0.0122538	0.0100447	0.018188	0.0158696	0.0161733	0	0	0	0.0127018	0.0149457
46	Inter-alpha-trypsin inhibitor heavy chain H3 OS=Homo sapiens GN=ITIH3 PE=1 SV=2	ITIH3_HUMAN	100	5.49	Homo sapiens	0	0	0	0	0	0	0	0	0	0	0	0	0	0	0	0	0	0	0	0	0	0	0	0	0	0	0	0	0	0	0	0	0	0	0	0	0	0	0	0	0	0	0	0
47	Keratin, type II cytoskeletal 5 OS=Homo sapiens GN=KRT5 PE=1 SV=3	K2C5_HUMAN	62	7.91	Homo sapiens	15	13	16	11	13	15	11	11	13	9	6	9	0	5	5	0.241935	0.209677	0.258065	0.177419	0.209677	0.241935	0.177419	0.177419	0.209677	0.145161	0.0967742	0.145161	0	0.0806452	0.0806452	0.0130726	0.0117264	0.0146744	0.0107831	0.0133606	0.0157961	0.0119857	0.0122008	0.0146951	0.0125484	0.00833654	0.0129873	0	0.00783442
48	Kininogen-1 OS=Homo sapiens GN=KNG1 PE=1 SV=2	KNG1_HUMAN	72	6.8	Homo sapiens	0	0	0	0	0	0	0	0	0	2	0	0	0	0	0	0	0	0	0	0	0	0	0	0	0.0277778	0	0	0	0	0	0	0	0	0	0	0	0	0	0	0.00240124	0	0	0	0
49	Ficolin-3 OS=Homo sapiens GN=FCN3 PE=1 SV=2	FCN3_HUMAN	33	6.66	Homo sapiens	2	0	0	6	4	4	3	2	0	0	0	0	8	8	9	0.0606061	0	0	0.181818	0.121212	0.121212	0.0909091	0.0606061	0	0	0	0	0.242424	0.242424	0.272727	0.00327474	0	0	0.0110504	0.00772359	0.00791403	0.00614141	0.00416777	0	0	0	0	0.0200149	0.0235507
50	Apolipoprotein C-III OS=Homo sapiens GN=APOC3 PE=1 SV=1	APOC3_HUMAN	11	5.04	Homo sapiens	3	2	3	2	2	0	2	2	0	0	0	0	0	0	0	0.272727	0.181818	0.272727	0.181818	0.181818	0	0.181818	0.181818	0	0	0	0	0	0	0	0.0147364	0.0101683	0.0155081	0.0110504	0.0115854	0	0.0122828	0.0125033	0	0	0	0	0	0
51	Keratin, type I cytoskeletal 14 OS=Homo sapiens GN=KRT14 PE=1 SV=4	K1C14_HUMAN	52	4.81	Homo sapiens	15	14	11	23	20	17	9	11	14	10	0	0	0	0	0	0.288462	0.269231	0.211538	0.442308	0.384615	0.326923	0.173077	0.211538	0.269231	0.192308	0	0	0	0	0	0.0155865	0.015057	0.0120288	0.0268823	0.0245075	0.021345	0.0116923	0.0145471	0.0188688	0.016624	0	0	0	0
52	Histidine-rich glycoprotein OS=Homo sapiens GN=HRG PE=1 SV=1	HRG_HUMAN	60	7.52	Homo sapiens	0	0	0	0	0	0	0	0	0	0	0	0	0	0	0	0	0	0	0	0	0	0	0	0	0	0	0	0	0	0	0	0	0	0	0	0	0	0	0	0	0	0	0	0
53	Coagulation factor IX OS=Homo sapiens GN=F9 PE=1 SV=2	FA9_HUMAN	52	5.16	Homo sapiens	0	0	0	0	0	0	0	0	0	0	0	0	0	0	0	0	0	0	0	0	0	0	0	0	0	0	0	0	0	0	0	0	0	0	0	0	0	0	0	0	0	0	0	0
54	Apolipoprotein(a) OS=Homo sapiens GN=LPA PE=1 SV=1	APOA_HUMAN	501	5.77	Homo sapiens	2	2	0	8	11	8	3	3	3	7	5	6	0	0	2	0.00399202	0.00399202	0	0.0159681	0.0219561	0.0159681	0.00598802	0.00598802	0.00598802	0.0139721	0.00998004	0.011976	0	0	0.00399202	0.000215702	0.000223257	0	0.000970498	0.00139903	0.00104257	0.000404524	0.000411785	0.000419665	0.00120781	0.000859723	0.00107147	0	0
55	Protein AMBP OS=Homo sapiens GN=AMBP PE=1 SV=1	AMBP_HUMAN	39	6.15	Homo sapiens	0	0	0	0	0	0	0	0	0	0	0	0	0	0	0	0	0	0	0	0	0	0	0	0	0	0	0	0	0	0	0	0	0	0	0	0	0	0	0	0	0	0	0	0
56	Immunoglobulin J chain OS=Homo sapiens GN=IGJ PE=1 SV=4	IGJ_HUMAN	18	4.87	Homo sapiens	4	2	4	3	3	3	4	5	4	0	0	3	3	4	3	0.222222	0.111111	0.222222	0.166667	0.166667	0.166667	0.222222	0.277778	0.222222	0	0	0.166667	0.166667	0.222222	0.166667	0.0120074	0.00621398	0.0126363	0.0101296	0.0106199	0.0108818	0.0150123	0.0191023	0.0155742	0	0	0.0149113	0.0137603	0.0215882
57	Clusterin OS=Homo sapiens GN=CLU PE=1 SV=1	CLUS_HUMAN	52	6.21	Homo sapiens	0	0	0	0	0	0	0	0	0	0	0	0	0	0	0	0	0	0	0	0	0	0	0	0	0	0	0	0	0	0	0	0	0	0	0	0	0	0	0	0	0	0	0	0
58	Apolipoprotein A-IV OS=Homo sapiens GN=APOA4 PE=1 SV=3	APOA4_HUMAN	45	5.05	Homo sapiens	0	0	0	0	0	0	0	0	0	0	0	0	0	0	0	0	0	0	0	0	0	0	0	0	0	0	0	0	0	0	0	0	0	0	0	0	0	0	0	0	0	0	0	0
59	Properdin OS=Homo sapiens GN=CFP PE=1 SV=2	PROP_HUMAN	51	7.92	Homo sapiens	6	5	6	4	4	4	7	5	6	0	0	0	6	9	5	0.117647	0.0980392	0.117647	0.0784314	0.0784314	0.0784314	0.137255	0.0980392	0.117647	0	0	0	0.117647	0.176471	0.0980392	0.00635686	0.00548293	0.00668979	0.00476686	0.00499762	0.00512084	0.00927233	0.00674198	0.00824519	0	0	0	0.00971313	0.0171435
60	Complement component C9 OS=Homo sapiens GN=C9 PE=1 SV=2	CO9_HUMAN	63	5.27	Homo sapiens	0	0	0	0	0	0	0	0	0	0	0	0	0	0	0	0	0	0	0	0	0	0	0	0	0	0	0	0	0	0	0	0	0	0	0	0	0	0	0	0	0	0	0	0
61	C4b-binding protein beta chain OS=Homo sapiens GN=C4BPB PE=1 SV=1	C4BPB_HUMAN	28	4.8	Homo sapiens	0	0	0	0	0	0	0	0	0	0	0	0	2	0	0	0	0	0	0	0	0	0	0	0	0	0	0	0.0714286	0	0	0	0	0	0	0	0	0	0	0	0	0	0	0.00589726	0
62	Complement C1s subcomponent OS=Homo sapiens GN=C1S PE=1 SV=1	C1S_HUMAN	77	4.59	Homo sapiens	0	0	0	0	0	0	0	0	0	0	0	0	0	0	0	0	0	0	0	0	0	0	0	0	0	0	0	0	0	0	0	0	0	0	0	0	0	0	0	0	0	0	0	0
63	Ig kappa chain V-III region HAH OS=Homo sapiens PE=2 SV=1	KV312_HUMAN	14	4.59	Homo sapiens	0	2	4	2	0	0	2	0	2	0	0	0	0	0	0	0	0.142857	0.285714	0.142857	0	0	0.142857	0	0.142857	0	0	0	0	0	0	0	0.00798941	0.0162466	0.00868249	0	0	0.00965079	0	0.010012	0	0	0	0	0
64	Ig heavy chain V-III region TRO OS=Homo sapiens PE=1 SV=1	HV301_HUMAN	13	10	Homo sapiens	0	0	0	0	0	0	0	0	0	0	0	0	0	0	0	0	0	0	0	0	0	0	0	0	0	0	0	0	0	0	0	0	0	0	0	0	0	0	0	0	0	0	0	0
65	Alpha-1-antichymotrypsin OS=Homo sapiens GN=SERPINA3 PE=1 SV=2	AACT_HUMAN	48	5.19	Homo sapiens	0	0	0	0	0	0	0	0	0	0	0	0	0	0	0	0	0	0	0	0	0	0	0	0	0	0	0	0	0	0	0	0	0	0	0	0	0	0	0	0	0	0	0	0
66	Ig heavy chain V-III region 23 OS=Homo sapiens GN=IGHV3-23 PE=1 SV=2	HV303_HUMAN	13	8.46	Homo sapiens	0	2	2	3	0	0	4	6	5	0	0	0	0	2	2	0	0.153846	0.153846	0.230769	0	0	0.307692	0.461538	0.384615	0	0	0	0	0.153846	0.153846	0	0.00860398	0.00874818	0.0140256	0	0	0.0207863	0.0317391	0.0269554	0	0	0	0	0.0149457
67	Ig heavy chain V-III region WAS OS=Homo sapiens PE=1 SV=1	HV315_HUMAN	13	8.84	Homo sapiens	0	0	0	0	0	0	0	0	0	0	0	0	0	0	0	0	0	0	0	0	0	0	0	0	0	0	0	0	0	0	0	0	0	0	0	0	0	0	0	0	0	0	0	0
68	Heparin cofactor 2 OS=Homo sapiens GN=SERPIND1 PE=1 SV=3	HEP2_HUMAN	57	6.89	Homo sapiens	0	0	0	0	0	0	0	0	0	0	0	0	0	0	0	0	0	0	0	0	0	0	0	0	0	0	0	0	0	0	0	0	0	0	0	0	0	0	0	0	0	0	0	0
69	Ig alpha-2 chain C region OS=Homo sapiens GN=IGHA2 PE=1 SV=3	IGHA2_HUMAN	37	6.02	Homo sapiens	7	6	6	6	5	0	5	6	0	0	0	0	0	0	0	0.189189	0.162162	0.162162	0.162162	0.135135	0	0.135135	0.162162	0	0	0	0	0	0	0	0.0102225	0.00906906	0.00922106	0.0098558	0.00861076	0	0.00912913	0.0111516	0	0	0	0	0	0
70	Apolipoprotein M OS=Homo sapiens GN=APOM PE=1 SV=2	APOM_HUMAN	21	5.92	Homo sapiens	0	0	0	0	0	0	0	0	0	0	0	0	0	0	0	0	0	0	0	0	0	0	0	0	0	0	0	0	0	0	0	0	0	0	0	0	0	0	0	0	0	0	0	0
71	Thrombospondin-1 OS=Homo sapiens GN=THBS1 PE=1 SV=2	TSP1_HUMAN	129	4.51	Homo sapiens	0	0	0	0	0	0	0	0	0	0	0	0	0	0	0	0	0	0	0	0	0	0	0	0	0	0	0	0	0	0	0	0	0	0	0	0	0	0	0	0	0	0	0	0
72	Alpha-2-HS-glycoprotein OS=Homo sapiens GN=AHSG PE=1 SV=1	FETUA_HUMAN	39	5.52	Homo sapiens	0	0	0	0	0	0	0	0	0	0	0	2	0	0	0	0	0	0	0	0	0	0	0	0	0	0	0.0512821	0	0	0	0	0	0	0	0	0	0	0	0	0	0	0.0045881	0	0
73	Vitamin D-binding protein OS=Homo sapiens GN=GC PE=1 SV=1	VTDB_HUMAN	53	5.21	Homo sapiens	0	0	0	0	0	0	0	0	0	3	4	5	0	0	0	0	0	0	0	0	0	0	0	0	0.0566038	0.0754717	0.0943396	0	0	0	0	0	0	0	0	0	0	0	0	0.00489309	0.00650145	0.00844036	0	0
74	Coagulation factor X OS=Homo sapiens GN=F10 PE=1 SV=2	FA10_HUMAN	55	5.74	Homo sapiens	0	0	0	0	0	0	0	0	0	0	0	0	0	0	0	0	0	0	0	0	0	0	0	0	0	0	0	0	0	0	0	0	0	0	0	0	0	0	0	0	0	0	0	0
75	Ig kappa chain V-I region EU OS=Homo sapiens PE=1 SV=1	KV106_HUMAN	12	8.46	Homo sapiens	3	2	3	2	2	2	2	2	0	0	0	0	0	0	0	0.25	0.166667	0.25	0.166667	0.166667	0.166667	0.166667	0.166667	0	0	0	0	0	0	0	0.0135083	0.00932098	0.0142158	0.0101296	0.0106199	0.0108818	0.0112593	0.0114614	0	0	0	0	0	0
76	Alpha-1-acid glycoprotein 1 OS=Homo sapiens GN=ORM1 PE=1 SV=1	A1AG1_HUMAN	24	4.66	Homo sapiens	0	0	0	0	0	0	0	0	0	2	2	2	0	0	0	0	0	0	0	0	0	0	0	0	0.0833333	0.0833333	0.0833333	0	0	0	0	0	0	0	0	0	0	0	0	0.00720372	0.00717869	0.00745566	0	0
77	Complement C1q subcomponent subunit B OS=Homo sapiens GN=C1QB PE=1 SV=3	C1QB_HUMAN	27	8.87	Homo sapiens	3	3	4	2	0	0	0	0	0	0	0	0	0	0	0	0.111111	0.111111	0.148148	0.0740741	0	0	0	0	0	0	0	0	0	0	0	0.0060037	0.00621398	0.00842418	0.00450203	0	0	0	0	0	0	0	0	0	0
78	Haptoglobin-related protein OS=Homo sapiens GN=HPR PE=2 SV=2	HPTR_HUMAN	39	7.11	Homo sapiens	0	0	7	0	0	0	5	3	3	0	0	0	0	0	2	0	0	0.179487	0	0	0	0.128205	0.0769231	0.0769231	0	0	0	0	0	0.0512821	0	0	0.0102062	0	0	0	0.00866097	0.00528986	0.00539109	0	0	0	0	0
79	Galectin-3-binding protein OS=Homo sapiens GN=LGALS3BP PE=1 SV=1	LG3BP_HUMAN	65	4.9	Homo sapiens	0	2	3	0	2	2	3	2	2	0	0	0	7	4	7	0	0.0307692	0.0461538	0	0.0307692	0.0307692	0.0461538	0.0307692	0.0307692	0	0	0	0.107692	0.0615385	0.107692	0	0.0017208	0.00262446	0	0.0019606	0.00200895	0.00311795	0.00211594	0.00215643	0	0	0	0.00889125	0.00597826
80	Coagulation factor V OS=Homo sapiens GN=F5 PE=1 SV=4	FA5_HUMAN	252	5.95	Homo sapiens	0	0	0	0	0	0	0	0	0	0	0	0	0	0	0	0	0	0	0	0	0	0	0	0	0	0	0	0	0	0	0	0	0	0	0	0	0	0	0	0	0	0	0	0
81	Complement component C8 alpha chain OS=Homo sapiens GN=C8A PE=1 SV=2	CO8A_HUMAN	65	6.41	Homo sapiens	0	0	0	0	0	0	0	0	0	0	0	0	0	0	0	0	0	0	0	0	0	0	0	0	0	0	0	0	0	0	0	0	0	0	0	0	0	0	0	0	0	0	0	0
82	Ig kappa chain V-I region AU OS=Homo sapiens PE=1 SV=1	KV102_HUMAN	12	4.34	Homo sapiens	0	0	0	0	0	0	0	0	0	0	0	0	0	0	0	0	0	0	0	0	0	0	0	0	0	0	0	0	0	0	0	0	0	0	0	0	0	0	0	0	0	0	0	0
83	Beta-2-glycoprotein 1 OS=Homo sapiens GN=APOH PE=1 SV=3	APOH_HUMAN	38	8.03	Homo sapiens	0	0	0	0	0	0	0	0	0	0	0	0	0	0	0	0	0	0	0	0	0	0	0	0	0	0	0	0	0	0	0	0	0	0	0	0	0	0	0	0	0	0	0	0
84	C-reactive protein OS=Homo sapiens GN=CRP PE=1 SV=1	CRP_HUMAN	25	5.32	Homo sapiens	0	0	0	0	0	0	0	0	0	0	0	0	0	0	0	0	0	0	0	0	0	0	0	0	0	0	0	0	0	0	0	0	0	0	0	0	0	0	0	0	0	0	0	0
85	Vitamin K-dependent protein Z OS=Homo sapiens GN=PROZ PE=1 SV=2	PROZ_HUMAN	45	5.87	Homo sapiens	0	0	0	0	0	0	0	0	0	0	0	0	0	0	0	0	0	0	0	0	0	0	0	0	0	0	0	0	0	0	0	0	0	0	0	0	0	0	0	0	0	0	0	0
86	Complement C1q subcomponent subunit A OS=Homo sapiens GN=C1QA PE=1 SV=2	C1QA_HUMAN	26	9.45	Homo sapiens	0	2	2	2	2	2	0	2	3	2	2	2	2	2	2	0	0.0769231	0.0769231	0.0769231	0.0769231	0.0769231	0	0.0769231	0.115385	0.0769231	0.0769231	0.0769231	0.0769231	0.0769231	0.0769231	0	0.00430199	0.00437409	0.00467519	0.00490151	0.00502236	0	0.00528986	0.00808663	0.00664958	0.00662648	0.00688214	0.00635089	0.00747283
87	Thrombospondin-4 OS=Homo sapiens GN=THBS4 PE=1 SV=2	TSP4_HUMAN	106	4.23	Homo sapiens	0	0	0	0	0	0	0	0	0	0	0	0	0	0	0	0	0	0	0	0	0	0	0	0	0	0	0	0	0	0	0	0	0	0	0	0	0	0	0	0	0	0	0	0
88	Complement C1r subcomponent OS=Homo sapiens GN=C1R PE=1 SV=2	C1R_HUMAN	80	6.14	Homo sapiens	0	0	0	0	0	0	0	0	0	0	0	0	0	0	0	0	0	0	0	0	0	0	0	0	0	0	0	0	0	0	0	0	0	0	0	0	0	0	0	0	0	0	0	0
89	Hemopexin OS=Homo sapiens GN=HPX PE=1 SV=2	HEMO_HUMAN	52	7.02	Homo sapiens	0	0	0	0	0	0	0	0	0	3	4	3	0	0	0	0	0	0	0	0	0	0	0	0	0.0576923	0.0769231	0.0576923	0	0	0	0	0	0	0	0	0	0	0	0	0.00498719	0.00662648	0.00516161	0	0
90	Transthyretin OS=Homo sapiens GN=TTR PE=1 SV=1	TTHY_HUMAN	16	5.58	Homo sapiens	0	0	0	0	0	0	0	0	0	0	0	0	0	0	0	0	0	0	0	0	0	0	0	0	0	0	0	0	0	0	0	0	0	0	0	0	0	0	0	0	0	0	0	0
91	Filamin-A OS=Homo sapiens GN=FLNA PE=1 SV=4	FLNA_HUMAN	281	5.95	Homo sapiens	0	0	0	0	0	0	0	0	0	0	0	0	8	5	8	0	0	0	0	0	0	0	0	0	0	0	0	0.0284698	0.0177936	0.0284698	0	0	0	0	0	0	0	0	0	0	0	0	0.00235051	0.00172859
92	Dermcidin OS=Homo sapiens GN=DCD PE=1 SV=2	DCD_HUMAN	11	6.52	Homo sapiens	0	2	0	0	0	0	3	4	5	0	2	2	0	0	0	0	0.181818	0	0	0	0	0.272727	0.363636	0.454545	0	0.181818	0.181818	0	0	0	0	0.0101683	0	0	0	0	0.0184242	0.0250066	0.0318564	0	0.0156626	0.0162669	0	0
93	Keratin, type I cytoskeletal 17 OS=Homo sapiens GN=KRT17 PE=1 SV=2	K1C17_HUMAN	48	4.67	Homo sapiens	12	9	8	14	11	11	6	8	0	0	0	0	0	0	0	0.25	0.1875	0.166667	0.291667	0.229167	0.229167	0.125	0.166667	0	0	0	0	0	0	0	0.0135083	0.0104861	0.0094772	0.0177267	0.0146024	0.0149625	0.00844444	0.0114614	0	0	0	0	0	0
94	Ig kappa chain V-II region RPMI 6410 OS=Homo sapiens PE=4 SV=1	KV206_HUMAN	15	9.53	Homo sapiens	3	3	3	0	0	0	0	0	0	0	0	0	0	0	0	0.2	0.2	0.2	0	0	0	0	0	0	0	0	0	0	0	0	0.0108067	0.0111852	0.0113726	0	0	0	0	0	0	0	0	0	0	0
95	Ig heavy chain V-III region GAL OS=Homo sapiens PE=1 SV=1	HV320_HUMAN	13	8.7	Homo sapiens	0	2	2	0	2	3	2	2	2	0	0	0	0	0	0	0	0.153846	0.153846	0	0.153846	0.230769	0.153846	0.153846	0.153846	0	0	0	0	0	0	0	0.00860398	0.00874818	0	0.00980302	0.0150671	0.0103932	0.0105797	0.0107822	0	0	0	0	0
96	Ig gamma-4 chain C region OS=Homo sapiens GN=IGHG4 PE=1 SV=1	IGHG4_HUMAN	36	7.41	Homo sapiens	0	0	0	0	0	0	0	0	0	0	0	0	0	0	0	0	0	0	0	0	0	0	0	0	0	0	0	0	0	0	0	0	0	0	0	0	0	0	0	0	0	0	0	0
97	Vitamin K-dependent protein C OS=Homo sapiens GN=PROC PE=1 SV=1	PROC_HUMAN	52	6.23	Homo sapiens	0	0	0	0	0	0	0	0	0	0	0	0	0	0	0	0	0	0	0	0	0	0	0	0	0	0	0	0	0	0	0	0	0	0	0	0	0	0	0	0	0	0	0	0
98	Apolipoprotein C-II OS=Homo sapiens GN=APOC2 PE=1 SV=1	APOC2_HUMAN	11	4.36	Homo sapiens	0	0	2	0	0	0	0	0	0	0	0	0	0	0	0	0	0	0.181818	0	0	0	0	0	0	0	0	0	0	0	0	0	0	0.0103388	0	0	0	0	0	0	0	0	0	0	0
99	Ig kappa chain V-IV region (Fragment) OS=Homo sapiens GN=IGKV4-1 PE=4 SV=1	KV401_HUMAN (+1)	13	4.85	Homo sapiens	2	0	2	0	0	0	0	0	0	0	0	0	0	0	0	0.153846	0	0.153846	0	0	0	0	0	0	0	0	0	0	0	0	0.00831281	0	0.00874818	0	0	0	0	0	0	0	0	0	0	0
100	Ig heavy chain V-III region WEA OS=Homo sapiens PE=1 SV=1	HV302_HUMAN	12	8.7	Homo sapiens	0	0	0	0	0	0	0	0	0	0	0	0	0	0	0	0	0	0	0	0	0	0	0	0	0	0	0	0	0	0	0	0	0	0	0	0	0	0	0	0	0	0	0	0
101	Protein Z-dependent protease inhibitor OS=Homo sapiens GN=SERPINA10 PE=1 SV=1	ZPI_HUMAN	51	8.58	Homo sapiens	0	0	0	0	0	0	0	0	0	0	0	0	0	0	0	0	0	0	0	0	0	0	0	0	0	0	0	0	0	0	0	0	0	0	0	0	0	0	0	0	0	0	0	0
102	Phosphatidylcholine-sterol acyltransferase OS=Homo sapiens GN=LCAT PE=1 SV=1	LCAT_HUMAN	50	6.04	Homo sapiens	0	0	0	0	0	0	0	0	0	0	0	0	0	0	0	0	0	0	0	0	0	0	0	0	0	0	0	0	0	0	0	0	0	0	0	0	0	0	0	0	0	0	0	0
103	Ig lambda chain V-III region LOI OS=Homo sapiens PE=1 SV=1	LV302_HUMAN	12	4.72	Homo sapiens	3	2	2	0	0	0	0	0	0	0	0	0	0	0	0	0.25	0.166667	0.166667	0	0	0	0	0	0	0	0	0	0	0	0	0.0135083	0.00932098	0.0094772	0	0	0	0	0	0	0	0	0	0	0
104	Actin, cytoplasmic 1 OS=Homo sapiens GN=ACTB PE=1 SV=1	ACTB_HUMAN (+1)	42	5.16	Homo sapiens	4	3	4	0	0	0	0	0	0	0	0	0	0	0	2	0.0952381	0.0714286	0.0952381	0	0	0	0	0	0	0	0	0	0	0	0.047619	0.00514603	0.0039947	0.00541554	0	0	0	0	0	0	0	0	0	0	0
105	Inter-alpha-trypsin inhibitor heavy chain H4 OS=Homo sapiens GN=ITIH4 PE=1 SV=4	ITIH4_HUMAN	103	6.97	Homo sapiens	0	0	0	0	0	0	0	0	0	0	0	0	0	0	0	0	0	0	0	0	0	0	0	0	0	0	0	0	0	0	0	0	0	0	0	0	0	0	0	0	0	0	0	0
106	Apolipoprotein A-II OS=Homo sapiens GN=APOA2 PE=1 SV=1	APOA2_HUMAN	11	6.6	Homo sapiens	0	0	0	0	0	0	0	0	0	2	2	0	0	0	0	0	0	0	0	0	0	0	0	0	0.181818	0.181818	0	0	0	0	0	0	0	0	0	0	0	0	0	0.0157172	0.0156626	0	0	0
107	Mannan-binding lectin serine protease 1 OS=Homo sapiens GN=MASP1 PE=1 SV=3	MASP1_HUMAN	79	5.18	Homo sapiens	0	0	0	0	0	0	0	0	0	0	0	0	0	0	0	0	0	0	0	0	0	0	0	0	0	0	0	0	0	0	0	0	0	0	0	0	0	0	0	0	0	0	0	0
108	Ficolin-2 OS=Homo sapiens GN=FCN2 PE=1 SV=2	FCN2_HUMAN	34	6.77	Homo sapiens	0	0	0	0	0	0	5	2	3	0	0	0	0	0	0	0	0	0	0	0	0	0.147059	0.0588235	0.0882353	0	0	0	0	0	0	0	0	0	0	0	0	0.00993464	0.00404519	0.00618389	0	0	0	0	0
109	Secreted phosphoprotein 24 OS=Homo sapiens GN=SPP2 PE=1 SV=1	SPP24_HUMAN	24	8.46	Homo sapiens	0	0	0	0	0	0	0	0	0	0	0	0	0	0	0	0	0	0	0	0	0	0	0	0	0	0	0	0	0	0	0	0	0	0	0	0	0	0	0	0	0	0	0	0
110	Complement component C8 gamma chain OS=Homo sapiens GN=C8G PE=1 SV=3	CO8G_HUMAN	22	8.48	Homo sapiens	0	0	0	0	0	0	0	0	0	0	0	0	0	0	0	0	0	0	0	0	0	0	0	0	0	0	0	0	0	0	0	0	0	0	0	0	0	0	0	0	0	0	0	0
111	Alpha-1B-glycoprotein OS=Homo sapiens GN=A1BG PE=1 SV=4	A1BG_HUMAN	54	5.71	Homo sapiens	0	0	0	0	0	0	0	0	0	0	0	0	0	0	0	0	0	0	0	0	0	0	0	0	0	0	0	0	0	0	0	0	0	0	0	0	0	0	0	0	0	0	0	0
112	Serum amyloid P-component OS=Homo sapiens GN=APCS PE=1 SV=2	SAMP_HUMAN	25	6.52	Homo sapiens	2	0	0	0	0	0	0	0	0	0	0	0	0	0	0	0.08	0	0	0	0	0	0	0	0	0	0	0	0	0	0	0.00432266	0	0	0	0	0	0	0	0	0	0	0	0	0
113	Protein S100-A9 OS=Homo sapiens GN=S100A9 PE=1 SV=1	S10A9_HUMAN	13	6.07	Homo sapiens	0	0	0	0	0	0	0	0	0	2	2	3	0	0	0	0	0	0	0	0	0	0	0	0	0.153846	0.153846	0.230769	0	0	0	0	0	0	0	0	0	0	0	0	0.0132992	0.013253	0.0206464	0	0
114	Tropomyosin alpha-4 chain OS=Homo sapiens GN=TPM4 PE=1 SV=3	TPM4_HUMAN	29	4.36	Homo sapiens	0	0	0	0	0	0	0	0	0	0	0	0	0	0	0	0	0	0	0	0	0	0	0	0	0	0	0	0	0	0	0	0	0	0	0	0	0	0	0	0	0	0	0	0
115	Ig kappa chain V-III region VG (Fragment) OS=Homo sapiens PE=1 SV=1	KV309_HUMAN	13	4.59	Homo sapiens	0	0	0	0	0	0	0	0	0	0	0	0	0	0	0	0	0	0	0	0	0	0	0	0	0	0	0	0	0	0	0	0	0	0	0	0	0	0	0	0	0	0	0	0
116	Complement component C8 beta chain OS=Homo sapiens GN=C8B PE=1 SV=3	CO8B_HUMAN	67	8.17	Homo sapiens	0	0	0	0	0	0	0	0	0	0	0	0	0	0	0	0	0	0	0	0	0	0	0	0	0	0	0	0	0	0	0	0	0	0	0	0	0	0	0	0	0	0	0	0
117	Ig heavy chain V-II region ARH-77 OS=Homo sapiens PE=4 SV=1	HV209_HUMAN	16	8.45	Homo sapiens	0	0	0	0	0	0	0	0	0	0	0	0	0	0	0	0	0	0	0	0	0	0	0	0	0	0	0	0	0	0	0	0	0	0	0	0	0	0	0	0	0	0	0	0
118	Ig lambda chain V-I region HA OS=Homo sapiens PE=1 SV=1	LV102_HUMAN	12	5.6	Homo sapiens	0	0	0	0	0	0	0	0	0	0	0	0	0	0	0	0	0	0	0	0	0	0	0	0	0	0	0	0	0	0	0	0	0	0	0	0	0	0	0	0	0	0	0	0
119	Complement C4-B OS=Homo sapiens GN=C4B PE=1 SV=2	CO4B_HUMAN	193	7.28	Homo sapiens	0	0	0	0	0	0	0	0	0	0	0	0	0	0	0	0	0	0	0	0	0	0	0	0	0	0	0	0	0	0	0	0	0	0	0	0	0	0	0	0	0	0	0	0
120	Alpha-2-antiplasmin OS=Homo sapiens GN=SERPINF2 PE=1 SV=3	A2AP_HUMAN	55	6.24	Homo sapiens	0	0	0	0	0	0	0	0	0	0	0	0	0	0	0	0	0	0	0	0	0	0	0	0	0	0	0	0	0	0	0	0	0	0	0	0	0	0	0	0	0	0	0	0
121	Ig lambda chain V-I region NIG-64 OS=Homo sapiens PE=1 SV=1	LV104_HUMAN	11	5.69	Homo sapiens	0	0	0	0	0	0	2	3	0	0	0	0	0	0	2	0	0	0	0	0	0	0.181818	0.272727	0	0	0	0	0	0	0.181818	0	0	0	0	0	0	0.0122828	0.018755	0	0	0	0	0	0
122	Ig heavy chain V-I region V35 OS=Homo sapiens PE=1 SV=1	HV103_HUMAN	13	9.87	Homo sapiens	0	0	0	0	0	0	0	0	0	0	0	0	0	0	0	0	0	0	0	0	0	0	0	0	0	0	0	0	0	0	0	0	0	0	0	0	0	0	0	0	0	0	0	0
123	Filaggrin OS=Homo sapiens GN=FLG PE=1 SV=3	FILA_HUMAN	435	9.6	Homo sapiens	0	0	0	0	0	0	3	2	2	0	0	0	0	0	0	0	0	0	0	0	0	0.00689655	0.0045977	0.0045977	0	0	0	0	0	0	0	0	0	0	0	0	0.0004659	0.000316175	0.000322226	0	0	0	0	0
124	Alpha-1-acid glycoprotein 2 OS=Homo sapiens GN=ORM2 PE=1 SV=2	A1AG2_HUMAN	24	4.76	Homo sapiens	0	0	0	0	0	0	0	0	0	0	0	0	0	0	0	0	0	0	0	0	0	0	0	0	0	0	0	0	0	0	0	0	0	0	0	0	0	0	0	0	0	0	0	0
125	Filaggrin-2 OS=Homo sapiens GN=FLG2 PE=1 SV=1	FILA2_HUMAN	248	8.35	Homo sapiens	0	0	0	2	0	2	2	4	3	0	0	0	0	0	0	0	0	0	0.00806452	0	0.00806452	0.00806452	0.016129	0.0120968	0	0	0	0	0	0	0	0	0	0.00049014	0	0.000526538	0.000544803	0.00110916	0.000847792	0	0	0	0	0
126	Ig heavy chain V-III region GA OS=Homo sapiens PE=1 SV=1	HV308_HUMAN	13	10.02	Homo sapiens	0	2	2	0	0	0	0	0	0	0	0	0	0	0	0	0	0.153846	0.153846	0	0	0	0	0	0	0	0	0	0	0	0	0	0.00860398	0.00874818	0	0	0	0	0	0	0	0	0	0	0
127	Lumican OS=Homo sapiens GN=LUM PE=1 SV=2	LUM_HUMAN	38	6.6	Homo sapiens	0	0	0	0	0	0	0	0	0	0	0	0	0	0	0	0	0	0	0	0	0	0	0	0	0	0	0	0	0	0	0	0	0	0	0	0	0	0	0	0	0	0	0	0
128	Phosphatidylinositol-glycan-specific phospholipase D OS=Homo sapiens GN=GPLD1 PE=1 SV=3	PHLD_HUMAN	92	6.33	Homo sapiens	0	0	0	0	0	0	0	0	0	0	0	0	0	0	0	0	0	0	0	0	0	0	0	0	0	0	0	0	0	0	0	0	0	0	0	0	0	0	0	0	0	0	0	0
129	Antithrombin-III OS=Homo sapiens GN=SERPINC1 PE=1 SV=1	ANT3_HUMAN	53	6.68	Homo sapiens	0	0	0	0	0	0	0	0	0	0	0	0	0	0	0	0	0	0	0	0	0	0	0	0	0	0	0	0	0	0	0	0	0	0	0	0	0	0	0	0	0	0	0	0
130	Complement factor B OS=Homo sapiens GN=CFB PE=1 SV=2	CFAB_HUMAN	86	7.07	Homo sapiens	0	0	0	0	0	0	0	0	0	2	0	3	0	0	0	0	0	0	0	0	0	0	0	0	0.0232558	0	0.0348837	0	0	0	0	0	0	0	0	0	0	0	0	0.00201034	0	0.00312097	0	0
131	Ig lambda chain V-III region SH OS=Homo sapiens PE=1 SV=1	LV301_HUMAN	11	6.5	Homo sapiens	0	0	0	0	0	0	0	0	0	0	0	0	0	0	0	0	0	0	0	0	0	0	0	0	0	0	0	0	0	0	0	0	0	0	0	0	0	0	0	0	0	0	0	0
132	Desmoplakin OS=Homo sapiens GN=DSP PE=1 SV=3	DESP_HUMAN	332	6.78	Homo sapiens	0	0	0	0	0	0	2	0	0	0	0	0	0	0	0	0	0	0	0	0	0	0.0060241	0	0	0	0	0	0	0	0	0	0	0	0	0	0	0.000406961	0	0	0	0	0	0	0
133	Protein S100-A8 OS=Homo sapiens GN=S100A8 PE=1 SV=1	S10A8_HUMAN	11	7.07	Homo sapiens	0	0	0	0	0	0	3	0	0	3	4	2	0	0	0	0	0	0	0	0	0	0.272727	0	0	0.272727	0.363636	0.181818	0	0	0	0	0	0	0	0	0	0.0184242	0	0	0.0235758	0.0313252	0.0162669	0	0
134	Lysozyme C OS=Homo sapiens GN=LYZ PE=1 SV=1	LYSC_HUMAN	17	9.35	Homo sapiens	0	2	2	0	0	2	0	0	0	0	0	0	0	0	0	0	0.117647	0.117647	0	0	0.117647	0	0	0	0	0	0	0	0	0	0	0.00657951	0.00668979	0	0	0.00768126	0	0	0	0	0	0	0	0
135	ATP synthase subunit beta, mitochondrial OS=Homo sapiens GN=ATP5B PE=1 SV=3	ATPB_HUMAN	57	5.07	Homo sapiens	0	2	0	0	0	0	0	0	0	0	0	0	0	0	0	0	0.0350877	0	0	0	0	0	0	0	0	0	0	0	0	0	0	0.00196231	0	0	0	0	0	0	0	0	0	0	0	0
136	Integrin beta-3 OS=Homo sapiens GN=ITGB3 PE=1 SV=2	ITB3_HUMAN	87	4.85	Homo sapiens	0	0	0	0	0	0	0	0	0	0	0	0	0	0	0	0	0	0	0	0	0	0	0	0	0	0	0	0	0	0	0	0	0	0	0	0	0	0	0	0	0	0	0	0
137	Small proline-rich protein 2A OS=Homo sapiens GN=SPRR2A PE=1 SV=1	SPR2A_HUMAN (+4)	8	8.49	Homo sapiens	2	2	2	0	0	0	2	0	0	2	2	0	0	0	0	0.25	0.25	0.25	0	0	0	0.25	0	0	0.25	0.25	0	0	0	0	0.0135083	0.0139815	0.0142158	0	0	0	0.0168889	0	0	0.0216111	0.0215361	0	0	0
138	Heat shock 70 kDa protein 1-like OS=Homo sapiens GN=HSPA1L PE=1 SV=2	HS71L_HUMAN	70	5.82	Homo sapiens	3	4	6	0	0	0	0	0	0	0	0	0	2	2	0	0.0428571	0.0571429	0.0857143	0	0	0	0	0	0	0	0	0	0.0285714	0.0285714	0	0.00231571	0.00319576	0.00487399	0	0	0	0	0	0	0	0	0	0.0023589	0.00277562
139	Ig kappa chain V-III region B6 OS=Homo sapiens PE=1 SV=1	KV301_HUMAN	12	9.53	Homo sapiens	0	0	0	0	0	0	0	0	0	0	0	0	0	0	0	0	0	0	0	0	0	0	0	0	0	0	0	0	0	0	0	0	0	0	0	0	0	0	0	0	0	0	0	0
140	Angiotensinogen OS=Homo sapiens GN=AGT PE=1 SV=1	ANGT_HUMAN	53	6.27	Homo sapiens	0	0	0	0	0	0	0	0	0	0	0	0	0	0	0	0	0	0	0	0	0	0	0	0	0	0	0	0	0	0	0	0	0	0	0	0	0	0	0	0	0	0	0	0
141	Complement component C6 OS=Homo sapiens GN=C6 PE=1 SV=3	CO6_HUMAN	105	6.74	Homo sapiens	0	0	0	0	0	0	0	0	0	0	0	0	0	0	0	0	0	0	0	0	0	0	0	0	0	0	0	0	0	0	0	0	0	0	0	0	0	0	0	0	0	0	0	0
142	Beta-Ala-His dipeptidase OS=Homo sapiens GN=CNDP1 PE=1 SV=4	CNDP1_HUMAN	57	4.95	Homo sapiens	0	0	0	0	0	0	0	0	0	0	0	0	0	0	0	0	0	0	0	0	0	0	0	0	0	0	0	0	0	0	0	0	0	0	0	0	0	0	0	0	0	0	0	0
143	Protein S100-A7 OS=Homo sapiens GN=S100A7 PE=1 SV=4	S10A7_HUMAN	11	6.78	Homo sapiens	0	0	0	0	0	0	0	0	0	2	2	0	0	0	0	0	0	0	0	0	0	0	0	0	0.181818	0.181818	0	0	0	0	0	0	0	0	0	0	0	0	0	0.0157172	0.0156626	0	0	0
144	Lipopolysaccharide-binding protein OS=Homo sapiens GN=LBP PE=1 SV=3	LBP_HUMAN	53	6.68	Homo sapiens	0	0	0	0	0	0	0	0	0	0	0	0	0	0	0	0	0	0	0	0	0	0	0	0	0	0	0	0	0	0	0	0	0	0	0	0	0	0	0	0	0	0	0	0
145	Gelsolin OS=Homo sapiens GN=GSN PE=1 SV=1	GELS_HUMAN	86	6.19	Homo sapiens	0	0	0	0	0	0	0	0	0	0	0	0	0	0	0	0	0	0	0	0	0	0	0	0	0	0	0	0	0	0	0	0	0	0	0	0	0	0	0	0	0	0	0	0
146	Calmodulin-like protein 5 OS=Homo sapiens GN=CALML5 PE=1 SV=2	CALL5_HUMAN	16	4.05	Homo sapiens	2	0	2	0	0	0	0	0	2	0	0	0	0	0	0	0.125	0	0.125	0	0	0	0	0	0.125	0	0	0	0	0	0	0.00675416	0	0.0071079	0	0	0	0	0	0.00876051	0	0	0	0	0
147	Calreticulin OS=Homo sapiens GN=CALR PE=1 SV=1	CALR_HUMAN	48	4.04	Homo sapiens	0	0	0	0	0	0	0	0	0	0	0	0	0	0	0	0	0	0	0	0	0	0	0	0	0	0	0	0	0	0	0	0	0	0	0	0	0	0	0	0	0	0	0	0
148	Trypsin-1 OS=Homo sapiens GN=PRSS1 PE=1 SV=1	TRY1_HUMAN	27	6.49	Homo sapiens	0	0	0	0	0	0	0	0	0	0	0	0	0	0	0	0	0	0	0	0	0	0	0	0	0	0	0	0	0	0	0	0	0	0	0	0	0	0	0	0	0	0	0	0
149	Phospholipid transfer protein OS=Homo sapiens GN=PLTP PE=1 SV=1	PLTP_HUMAN	55	7.01	Homo sapiens	0	0	0	0	0	0	0	0	0	0	0	0	0	0	0	0	0	0	0	0	0	0	0	0	0	0	0	0	0	0	0	0	0	0	0	0	0	0	0	0	0	0	0	0
150	Neutrophil defensin 1 OS=Homo sapiens GN=DEFA1 PE=1 SV=1	DEF1_HUMAN (+1)	10	7.04	Homo sapiens	0	0	0	0	0	0	0	0	0	0	0	0	0	0	0	0	0	0	0	0	0	0	0	0	0	0	0	0	0	0	0	0	0	0	0	0	0	0	0	0	0	0	0	0
151	Elongation factor 1-alpha 1 OS=Homo sapiens GN=EEF1A1 PE=1 SV=1	EF1A1_HUMAN (+2)	50	9.5	Homo sapiens	3	3	3	0	0	0	0	0	0	0	0	0	2	2	3	0.06	0.06	0.06	0	0	0	0	0	0	0	0	0	0.04	0.04	0.06	0.003242	0.00335555	0.00341179	0	0	0	0	0	0	0	0	0	0.00330246	0.00388587
152	Extracellular superoxide dismutase [Cu-Zn] OS=Homo sapiens GN=SOD3 PE=1 SV=2	SODE_HUMAN	26	6.59	Homo sapiens	0	0	0	0	0	0	0	0	0	0	0	0	0	0	0	0	0	0	0	0	0	0	0	0	0	0	0	0	0	0	0	0	0	0	0	0	0	0	0	0	0	0	0	0
153	Serum paraoxonase/lactonase 3 OS=Homo sapiens GN=PON3 PE=1 SV=3	PON3_HUMAN	40	5.1	Homo sapiens	0	0	0	0	0	0	0	0	0	0	0	0	0	0	0	0	0	0	0	0	0	0	0	0	0	0	0	0	0	0	0	0	0	0	0	0	0	0	0	0	0	0	0	0
154	Ig kappa chain V-III region CLL OS=Homo sapiens PE=4 SV=2	KV308_HUMAN	14	8.7	Homo sapiens	0	0	0	0	0	0	0	0	0	0	0	0	0	0	0	0	0	0	0	0	0	0	0	0	0	0	0	0	0	0	0	0	0	0	0	0	0	0	0	0	0	0	0	0
155	Retinol-binding protein 4 OS=Homo sapiens GN=RBP4 PE=1 SV=3	RET4_HUMAN	23	5.85	Homo sapiens	0	0	0	0	0	0	0	0	0	0	0	0	0	0	0	0	0	0	0	0	0	0	0	0	0	0	0	0	0	0	0	0	0	0	0	0	0	0	0	0	0	0	0	0
156	Ig kappa chain V-III region IARC/BL41 OS=Homo sapiens PE=4 SV=1	KV311_HUMAN	14	4.59	Homo sapiens	0	0	0	0	0	0	0	0	0	0	0	0	0	0	0	0	0	0	0	0	0	0	0	0	0	0	0	0	0	0	0	0	0	0	0	0	0	0	0	0	0	0	0	0
157	Polymeric immunoglobulin receptor OS=Homo sapiens GN=PIGR PE=1 SV=4	PIGR_HUMAN	83	5.43	Homo sapiens	0	0	0	0	0	0	0	0	0	0	0	0	2	0	3	0	0	0	0	0	0	0	0	0	0	0	0	0.0240964	0	0.0361446	0	0	0	0	0	0	0	0	0	0	0	0	0.00198944	0
158	Resistin OS=Homo sapiens GN=RETN PE=2 SV=1	RETN_HUMAN	11	6.89	Homo sapiens	0	0	0	0	0	0	0	0	0	0	0	0	0	0	0	0	0	0	0	0	0	0	0	0	0	0	0	0	0	0	0	0	0	0	0	0	0	0	0	0	0	0	0	0
159	Complement factor H-related protein 1 OS=Homo sapiens GN=CFHR1 PE=1 SV=2	FHR1_HUMAN	38	7.42	Homo sapiens	0	0	0	0	0	0	0	0	0	0	0	0	0	0	0	0	0	0	0	0	0	0	0	0	0	0	0	0	0	0	0	0	0	0	0	0	0	0	0	0	0	0	0	0
160	Serum amyloid A-2 protein OS=Homo sapiens GN=SAA2 PE=1 SV=1	SAA2_HUMAN	14	9.48	Homo sapiens	0	0	0	0	0	0	0	0	0	0	0	0	0	0	0	0	0	0	0	0	0	0	0	0	0	0	0	0	0	0	0	0	0	0	0	0	0	0	0	0	0	0	0	0
161	Mannan-binding lectin serine protease 2 OS=Homo sapiens GN=MASP2 PE=1 SV=4	MASP2_HUMAN	76	5.37	Homo sapiens	0	0	0	0	0	0	0	0	0	0	0	0	0	0	0	0	0	0	0	0	0	0	0	0	0	0	0	0	0	0	0	0	0	0	0	0	0	0	0	0	0	0	0	0
162	Apolipoprotein C-I OS=Homo sapiens GN=APOC1 PE=1 SV=1	APOC1_HUMAN	9	9.17	Homo sapiens	0	0	0	0	0	0	0	0	0	0	0	0	0	0	0	0	0	0	0	0	0	0	0	0	0	0	0	0	0	0	0	0	0	0	0	0	0	0	0	0	0	0	0	0
163	Desmocollin-1 OS=Homo sapiens GN=DSC1 PE=1 SV=2	DSC1_HUMAN	100	5.08	Homo sapiens	0	2	0	2	0	2	0	0	0	0	0	0	0	0	0	0	0.02	0	0.02	0	0.02	0	0	0	0	0	0	0	0	0	0	0.00111852	0	0.00121555	0	0.00130581	0	0	0	0	0	0	0	0
164	Apolipoprotein F OS=Homo sapiens GN=APOF PE=1 SV=2	APOF_HUMAN	35	5.36	Homo sapiens	0	0	0	0	0	0	0	0	0	0	0	0	0	0	0	0	0	0	0	0	0	0	0	0	0	0	0	0	0	0	0	0	0	0	0	0	0	0	0	0	0	0	0	0
165	Ubiquitin-60S ribosomal protein L40 OS=Homo sapiens GN=UBA52 PE=1 SV=2	RL40_HUMAN (+3)	15	10.51	Homo sapiens	2	2	2	0	0	0	0	0	0	0	0	0	0	0	0	0.133333	0.133333	0.133333	0	0	0	0	0	0	0	0	0	0	0	0	0.00720444	0.00745678	0.00758176	0	0	0	0	0	0	0	0	0	0	0
166	Hemoglobin subunit beta OS=Homo sapiens GN=HBB PE=1 SV=2	HBB_HUMAN	16	7.32	Homo sapiens	0	0	0	0	0	0	0	0	0	0	0	0	0	0	0	0	0	0	0	0	0	0	0	0	0	0	0	0	0	0	0	0	0	0	0	0	0	0	0	0	0	0	0	0
167	Ig heavy chain V-III region BUT OS=Homo sapiens PE=1 SV=1	HV306_HUMAN	12	9.48	Homo sapiens	0	0	0	0	0	0	0	0	0	0	0	0	0	0	0	0	0	0	0	0	0	0	0	0	0	0	0	0	0	0	0	0	0	0	0	0	0	0	0	0	0	0	0	0
168	Plasma protease C1 inhibitor OS=Homo sapiens GN=SERPING1 PE=1 SV=2	IC1_HUMAN	55	6.52	Homo sapiens	0	0	0	0	0	0	0	0	0	0	0	0	0	0	0	0	0	0	0	0	0	0	0	0	0	0	0	0	0	0	0	0	0	0	0	0	0	0	0	0	0	0	0	0
169	Hemoglobin subunit alpha OS=Homo sapiens GN=HBA1 PE=1 SV=2	HBA_HUMAN	15	9.09	Homo sapiens	0	0	0	0	0	0	0	0	0	0	0	0	0	0	0	0	0	0	0	0	0	0	0	0	0	0	0	0	0	0	0	0	0	0	0	0	0	0	0	0	0	0	0	0
170	Mannose-binding protein C OS=Homo sapiens GN=MBL2 PE=1 SV=2	MBL2_HUMAN	26	5.14	Homo sapiens	0	0	0	0	0	0	0	0	0	0	0	0	0	0	0	0	0	0	0	0	0	0	0	0	0	0	0	0	0	0	0	0	0	0	0	0	0	0	0	0	0	0	0	0
171	Desmoglein-1 OS=Homo sapiens GN=DSG1 PE=1 SV=2	DSG1_HUMAN	114	4.66	Homo sapiens	0	0	0	0	0	0	0	0	0	0	0	0	0	0	0	0	0	0	0	0	0	0	0	0	0	0	0	0	0	0	0	0	0	0	0	0	0	0	0	0	0	0	0	0
172	Erythrocyte band 7 integral membrane protein OS=Homo sapiens GN=STOM PE=1 SV=3	STOM_HUMAN	32	8.07	Homo sapiens	0	0	0	0	0	0	0	0	0	0	0	0	0	0	0	0	0	0	0	0	0	0	0	0	0	0	0	0	0	0	0	0	0	0	0	0	0	0	0	0	0	0	0	0
173	Collectin-11 OS=Homo sapiens GN=COLEC11 PE=1 SV=1	COL11_HUMAN	29	5.06	Homo sapiens	0	0	0	0	0	0	0	0	0	0	0	0	0	0	0	0	0	0	0	0	0	0	0	0	0	0	0	0	0	0	0	0	0	0	0	0	0	0	0	0	0	0	0	0
174	Coagulation factor XII OS=Homo sapiens GN=F12 PE=1 SV=3	FA12_HUMAN	68	7.76	Homo sapiens	0	0	0	0	0	0	0	0	0	0	0	0	0	0	0	0	0	0	0	0	0	0	0	0	0	0	0	0	0	0	0	0	0	0	0	0	0	0	0	0	0	0	0	0
175	Pigment epithelium-derived factor OS=Homo sapiens GN=SERPINF1 PE=1 SV=4	PEDF_HUMAN	46	6.33	Homo sapiens	0	0	0	0	0	0	0	0	0	0	0	0	0	0	0	0	0	0	0	0	0	0	0	0	0	0	0	0	0	0	0	0	0	0	0	0	0	0	0	0	0	0	0	0
176	Keratin, type II cytoskeletal 6C OS=Homo sapiens GN=KRT6C PE=1 SV=3	K2C6C_HUMAN	60	8.16	Homo sapiens	0	0	0	0	17	0	0	0	0	0	0	0	0	0	0	0	0	0	0	0.283333	0	0	0	0	0	0	0	0	0	0	0	0	0	0	0.0180539	0	0	0	0	0	0	0	0	0
177	Adenosylhomocysteinase OS=Homo sapiens GN=AHCY PE=1 SV=4	SAHH_HUMAN	48	6.29	Homo sapiens	0	0	2	0	0	0	0	0	0	0	0	0	0	0	0	0	0	0.0416667	0	0	0	0	0	0	0	0	0	0	0	0	0	0	0.0023693	0	0	0	0	0	0	0	0	0	0	0
178	Zinc-alpha-2-glycoprotein OS=Homo sapiens GN=AZGP1 PE=1 SV=2	ZA2G_HUMAN	34	5.92	Homo sapiens	0	0	0	0	0	0	0	0	0	0	0	0	0	0	0	0	0	0	0	0	0	0	0	0	0	0	0	0	0	0	0	0	0	0	0	0	0	0	0	0	0	0	0	0
179	ATP synthase subunit alpha, mitochondrial OS=Homo sapiens GN=ATP5A1 PE=1 SV=1	ATPA_HUMAN	60	9.56	Homo sapiens	0	0	0	0	0	0	0	0	0	0	0	0	0	0	0	0	0	0	0	0	0	0	0	0	0	0	0	0	0	0	0	0	0	0	0	0	0	0	0	0	0	0	0	0
180	Complement factor I OS=Homo sapiens GN=CFI PE=1 SV=2	CFAI_HUMAN	66	7.53	Homo sapiens	0	0	0	0	0	0	0	0	0	0	0	0	0	0	0	0	0	0	0	0	0	0	0	0	0	0	0	0	0	0	0	0	0	0	0	0	0	0	0	0	0	0	0	0
181	Afamin OS=Homo sapiens GN=AFM PE=1 SV=1	AFAM_HUMAN	69	5.7	Homo sapiens	0	0	0	0	0	0	0	0	0	0	0	0	0	0	0	0	0	0	0	0	0	0	0	0	0	0	0	0	0	0	0	0	0	0	0	0	0	0	0	0	0	0	0	0
182	Junction plakoglobin OS=Homo sapiens GN=JUP PE=1 SV=3	PLAK_HUMAN	82	6.05	Homo sapiens	0	0	0	2	2	2	0	0	0	0	0	0	0	0	0	0	0	0	0.0243902	0.0243902	0.0243902	0	0	0	0	0	0	0	0	0	0	0	0	0.00148238	0.00155414	0.00159246	0	0	0	0	0	0	0	0
183	Plasma kallikrein OS=Homo sapiens GN=KLKB1 PE=1 SV=1	KLKB1_HUMAN	71	8.26	Homo sapiens	0	0	0	0	0	0	0	0	0	0	0	0	0	0	0	0	0	0	0	0	0	0	0	0	0	0	0	0	0	0	0	0	0	0	0	0	0	0	0	0	0	0	0	0
184	Collectin-10 OS=Homo sapiens GN=COLEC10 PE=2 SV=2	COL10_HUMAN	31	7.39	Homo sapiens	0	0	0	0	0	0	0	0	0	0	0	0	0	0	0	0	0	0	0	0	0	0	0	0	0	0	0	0	0	0	0	0	0	0	0	0	0	0	0	0	0	0	0	0
185	Suprabasin OS=Homo sapiens GN=SBSN PE=1 SV=2	SBSN_HUMAN	61	7.01	Homo sapiens	0	0	0	0	0	0	0	0	0	0	0	0	0	0	0	0	0	0	0	0	0	0	0	0	0	0	0	0	0	0	0	0	0	0	0	0	0	0	0	0	0	0	0	0
186	Serum amyloid A-4 protein OS=Homo sapiens GN=SAA4 PE=1 SV=2	SAA4_HUMAN	15	9.38	Homo sapiens	0	0	0	0	0	0	0	0	0	0	0	0	0	0	0	0	0	0	0	0	0	0	0	0	0	0	0	0	0	0	0	0	0	0	0	0	0	0	0	0	0	0	0	0
187	Aggrecan core protein OS=Homo sapiens GN=ACAN PE=1 SV=2	PGCA_HUMAN	250	3.82	Homo sapiens	0	0	0	0	0	0	0	0	0	0	0	0	0	0	0	0	0	0	0	0	0	0	0	0	0	0	0	0	0	0	0	0	0	0	0	0	0	0	0	0	0	0	0	0
188	Ig kappa chain V-I region Lay OS=Homo sapiens PE=1 SV=1	KV113_HUMAN	12	4.53	Homo sapiens	0	0	0	0	0	0	0	0	0	0	0	0	0	0	0	0	0	0	0	0	0	0	0	0	0	0	0	0	0	0	0	0	0	0	0	0	0	0	0	0	0	0	0	0
189	Endoplasmin OS=Homo sapiens GN=HSP90B1 PE=1 SV=1	ENPL_HUMAN	92	4.48	Homo sapiens	0	0	0	0	0	0	0	0	0	0	0	0	0	0	0	0	0	0	0	0	0	0	0	0	0	0	0	0	0	0	0	0	0	0	0	0	0	0	0	0	0	0	0	0
190	Coagulation factor VII OS=Homo sapiens GN=F7 PE=1 SV=1	FA7_HUMAN	52	7.23	Homo sapiens	0	0	0	0	0	0	0	0	0	0	0	0	0	0	0	0	0	0	0	0	0	0	0	0	0	0	0	0	0	0	0	0	0	0	0	0	0	0	0	0	0	0	0	0
191	Carboxypeptidase N catalytic chain OS=Homo sapiens GN=CPN1 PE=1 SV=1	CBPN_HUMAN	52	7.36	Homo sapiens	0	0	0	0	0	0	0	0	0	0	0	0	0	0	0	0	0	0	0	0	0	0	0	0	0	0	0	0	0	0	0	0	0	0	0	0	0	0	0	0	0	0	0	0
192	Glutathione peroxidase 3 OS=Homo sapiens GN=GPX3 PE=1 SV=2	GPX3_HUMAN	26	8.29	Homo sapiens	0	0	0	0	0	0	0	0	0	0	0	0	0	0	0	0	0	0	0	0	0	0	0	0	0	0	0	0	0	0	0	0	0	0	0	0	0	0	0	0	0	0	0	0
193	Glyceraldehyde-3-phosphate dehydrogenase OS=Homo sapiens GN=GAPDH PE=1 SV=3	G3P_HUMAN	36	8.73	Homo sapiens	0	2	3	0	0	0	0	0	0	0	0	0	0	0	0	0	0.0555556	0.0833333	0	0	0	0	0	0	0	0	0	0	0	0	0	0.00310699	0.0047386	0	0	0	0	0	0	0	0	0	0	0
194	Myosin-9 OS=Homo sapiens GN=MYH9 PE=1 SV=4	MYH9_HUMAN	227	5.29	Homo sapiens	0	0	0	0	0	0	0	0	0	0	0	0	0	0	0	0	0	0	0	0	0	0	0	0	0	0	0	0	0	0	0	0	0	0	0	0	0	0	0	0	0	0	0	0
195	Tetranectin OS=Homo sapiens GN=CLEC3B PE=1 SV=3	TETN_HUMAN	23	5.36	Homo sapiens	0	0	0	0	0	0	0	0	0	0	0	0	0	0	0	0	0	0	0	0	0	0	0	0	0	0	0	0	0	0	0	0	0	0	0	0	0	0	0	0	0	0	0	0
196	GTP-binding nuclear protein Ran OS=Homo sapiens GN=RAN PE=1 SV=3	RAN_HUMAN	24	7.59	Homo sapiens	0	2	0	0	0	0	0	0	0	0	0	0	0	0	0	0	0.0833333	0	0	0	0	0	0	0	0	0	0	0	0	0	0	0.00466049	0	0	0	0	0	0	0	0	0	0	0	0
197	40S ribosomal protein S13 OS=Homo sapiens GN=RPS13 PE=1 SV=2	RS13_HUMAN	17	11.19	Homo sapiens	2	2	0	0	0	0	0	0	0	0	0	0	0	0	0	0.117647	0.117647	0	0	0	0	0	0	0	0	0	0	0	0	0	0.00635686	0.00657951	0	0	0	0	0	0	0	0	0	0	0	0
198	Cartilage acidic protein 1 OS=Homo sapiens GN=CRTAC1 PE=1 SV=2	CRAC1_HUMAN	71	4.73	Homo sapiens	0	0	0	0	0	0	0	0	0	0	0	0	0	0	0	0	0	0	0	0	0	0	0	0	0	0	0	0	0	0	0	0	0	0	0	0	0	0	0	0	0	0	0	0
199	Sodium-dependent phosphate transporter 2 OS=Homo sapiens GN=SLC20A2 PE=1 SV=1	S20A2_HUMAN	70	6.09	Homo sapiens	0	0	0	0	0	0	0	0	0	0	0	0	2	0	0	0	0	0	0	0	0	0	0	0	0	0	0	0.0285714	0	0	0	0	0	0	0	0	0	0	0	0	0	0	0.0023589	0
200	Platelet glycoprotein Ib alpha chain OS=Homo sapiens GN=GP1BA PE=1 SV=2	GP1BA_HUMAN	72	6.24	Homo sapiens	0	0	0	0	0	0	0	0	0	0	0	0	0	0	0	0	0	0	0	0	0	0	0	0	0	0	0	0	0	0	0	0	0	0	0	0	0	0	0	0	0	0	0	0
[truncated: 155 more columns]

## Sheet: MW
						CHOL					DOPG					DOTAP
						17.9913	15.8211	14.5376	11.4512	11.2674	20.6391	40.3784	17.2142	39.6391	31.8876	47.3435	0	47.7883	25.6368	40.5912
#	Identified Proteins (200)	Accession Number	Molecular Weight	pI	Taxonomy	CHOL_A	CHOL_B	CHOL_C	CHOL_D	CHOL_E	DOPG_A	DOPG_B	DOPG_C	DOPG_D	DOPG_E	DOTAP_A	DOTAP_B	DOTAP_C	DOTAP_D	DOTAP_E
1	Apolipoprotein B-100 OS=Homo sapiens GN=APOB PE=1 SV=2	APOB_HUMAN	516	7.04	Homo sapiens	0.00423657	0.0076279	0.00173255	0.0041822	0.00407842	0.00701593	0.00443949	0.000825046	0.00450185	0.00397039	0.00747	0	0.00516407	0.00496444	0.00318284
2	Ig gamma-1 chain C region OS=Homo sapiens GN=IGHG1 PE=1 SV=1	IGHG1_HUMAN	36	8.31	Homo sapiens	0.0792865	0.1113	0.0815666	0.0857766	0.11293	0.0847341	0.0929875	0.0860958	0.0814625	0.1159	0.0281711	0	0.0383905	0.0502016	0.0396878
3	Complement C3 OS=Homo sapiens GN=C3 PE=1 SV=2	CO3_HUMAN	187	6.34	Homo sapiens	0.0102963	0.0111185	0.00600493	0.00979829	0.0150568	0.003646	0.00688537	0.00155666	0.00766789	0.00688109	0.0227626	0	0.0175972	0.0194019	0.0217392			4	0.00438289	0.00876527	0.00264829	0.00522853	0.00419518	0.00701593	0.00525965	0.00164181	0.0050737	0.00423517	0.00749721	0	0.00548497	0.00530152	0.00342887
4	Serum albumin OS=Homo sapiens GN=ALB PE=1 SV=2	ALBU_HUMAN	69	6.21	Homo sapiens	0.0287607	0.0253924	0.0222698	0.0945698	0.0500871	0.00893319	0.0204736	0.023579	0.0917398	0.0152987	0.026334	0	0.0228375	0.0309039	0.0221355			16	0.0278162	0.031821	0.0199851	0.0290147	0.0334278	0.0151837	0.0212628	0.007747	0.026948	0.0152799	0.0633273	0	0.056674	0.050853	0.0545467
5	Ig mu chain C region OS=Homo sapiens GN=IGHM PE=1 SV=3	IGHM_HUMAN	49	6.77	Homo sapiens	0.0351288	0.0456517	0.0917703	0.0279351	0.0850879	0.0418111	0.0379909	0.0763112	0.0223504	0.0475926	0.0136452	0	0.0367245	0.0177773	0.0249725			27	0.0413371	0.039517	0.0246049	0.0368498	0.0457872	0.0201741	0.0263085	0.0136859	0.0405861	0.0201773	0.127228	0	0.0908582	0.0876676	0.0901496
6	C4b-binding protein alpha chain OS=Homo sapiens GN=C4BPA PE=1 SV=2	C4BPA_HUMAN	67	7.31	Homo sapiens	0.0152034	0.0135507	0.0123042	0.0052301	0.0597752	0.0110909	0.0231142	0.007812	0.00464438	0.0223343	0.0308924	0	0.0388493	0.0516206	0.0276991			38	0.0453294	0.0428352	0.0246049	0.0456151	0.0503229	0.0238238	0.0305099	0.0145865	0.0526306	0.0224406	0.155481	0	0.110886	0.104966	0.106997
7	Vitronectin OS=Homo sapiens GN=VTN PE=1 SV=1	VTNC_HUMAN	54	5.54	Homo sapiens	0.0297714	0.00658982	0	0.00160083	0.0060042	0	0.00136213	0	0.00249169	0.00174269	0.0554887	0	0.0449092	0.062365	0.0878951			50	0.0553922	0.0455631	0.0263924	0.0729225	0.0639559	0.0238238	0.0353121	0.0155876	0.0765018	0.0244775	0.222827	0	0.160853	0.137773	0.146385
8	Keratin, type II cytoskeletal 1 OS=Homo sapiens GN=KRT1 PE=1 SV=6	K2C1_HUMAN	66	8.33	Homo sapiens	0.0348742	0.0436345	0.05043	0.0476146	0.0270158	0.0220331	0.0220085	0.0498735	0.0115628	0.0199654	0.00937046	0	0.00571067	0.0208841	0.010699			69	0.211334	0.219583	0.195637	0.278925	0.250321	0.108531	0.15139	0.199586	0.207075	0.11747	0.333877	0	0.259001	0.312636	0.25453
9	Ig kappa chain C region OS=Homo sapiens GN=IGKC PE=1 SV=1	IGKC_HUMAN	12	5.68	Homo sapiens	0.0943107	0.0911032	0.147199	0.126411	0.0930728	0.219805	0.198126	0.180652	0.137804	0.202796	0.0288041	0	0.064506	0.0574162	0.0547557			97	0.314538	0.323939	0.268598	0.346026	0.303938	0.170905	0.20363	0.278909	0.282995	0.167277	0.47755	0	0.382646	0.468258	0.413143
10	Complement C4-A OS=Homo sapiens GN=C4A PE=1 SV=2	CO4A_HUMAN	193	7.08	Homo sapiens	0.00401904	0.00305504	0.0024977	0.00286388	0.00555042	0.00340762	0.00331873	0.001405	0.00228242	0.00211076	0.0104294	0	0.0118795	0.012665	0.00983101			111	0.437681	0.463006	0.413837	0.471384	0.470962	0.268946	0.298738	0.428437	0.393365	0.284824	0.58886	0	0.511129	0.569735	0.513848
11	Complement factor H OS=Homo sapiens GN=CFH PE=1 SV=4	CFAH_HUMAN	139	6.59	Homo sapiens	0.0127904	0.0068556	0.00461976	0.0071266	0.0123594	0.00499039	0.00486773	0.00403655	0.00611892	0.00489744	0.0108907	0	0.00682919	0.00841711	0.00685425			132	0.612239	0.684472	0.564685	0.612786	0.6673	0.456739	0.511883	0.626865	0.620849	0.522432	0.741689	0	0.680583	0.717438	0.684286
12	Keratin, type I cytoskeletal 9 OS=Homo sapiens GN=KRT9 PE=1 SV=3	K1C9_HUMAN	62	4.89	Homo sapiens	0.0323896	0.0363505	0.0299282	0.027234	0.017727	0.0111881	0.0155906	0.0406004	0.00774298	0.0143119	0.00451925	0	0.0021351	0.0125814	0.00556303			154	0.689129	0.767711	0.617992	0.661482	0.740348	0.544858	0.586609	0.665819	0.694309	0.594225	0.843174	0	0.793738	0.833958	0.789932
13	Fibrinogen beta chain OS=Homo sapiens GN=FGB PE=1 SV=2	FIBB_HUMAN	56	8.38	Homo sapiens	0.0069622	0.00711304	0	0.0104063	0.00743771	0.0158708	0.00809128	0.00311096	0.015929	0.00708829	0.0238978	0	0.0265711	0.0222883	0.0221426			200	1	1	1	1	1	1	1	1	1	1	1	0	1	1	1
14	Ig lambda-3 chain C regions OS=Homo sapiens GN=IGLC3 PE=1 SV=1	LAC3_HUMAN	11	7.34	Homo sapiens	0.0859388	0.0941336	0.108645	0.121736	0.135122	0.114662	0.0647453	0.1232	0.0611154	0.0874846	0.0352194	0	0.0564173	0.0685595	0.0634463
15	Alpha-2-macroglobulin OS=Homo sapiens GN=A2M PE=1 SV=3	A2MG_HUMAN	163	6.43	Homo sapiens	0.00409572	0.00569421	0.00548215	0.00822646	0.00643296	0	0.00141973	0	0.00851943	0.000641781	0.00518456	0	0.0055318	0.00566265	0.00564293
16	Ig gamma-3 chain C region OS=Homo sapiens GN=IGHG3 PE=1 SV=2	IGHG3_HUMAN	41	7.95	Homo sapiens	0.0564632	0.0628275	0.0402443	0.0461126	0.0766582	0.055496	0.0405713	0.0519726	0.0373372	0.063811	0.0185306	0	0.021268	0.0237816	0.0312407
17	Prothrombin OS=Homo sapiens GN=F2 PE=1 SV=2	THRB_HUMAN	70	5.7	Homo sapiens	0.00395848	0	0	0	0	0	0	0	0.00144929	0	0.0350916	0	0.0220219	0.0159741	0.0218209
18	Keratin, type I cytoskeletal 10 OS=Homo sapiens GN=KRT10 PE=1 SV=6	K1C10_HUMAN	59	4.88	Homo sapiens	0.0207137	0.0243516	0.0322767	0.0221689	0.00917804	0.00985004	0.0113635	0.0206806	0.00800006	0.0113319	0.00644775	0	0.00343971	0.0134399	0.00723719
19	Haptoglobin OS=Homo sapiens GN=HP PE=1 SV=1	HPT_HUMAN	45	6.56	Homo sapiens	0.0119709	0.0130359	0.00658849	0.0271046	0.00388548	0.00073413	0.00658026	0.00431279	0.0269359	0.00464772	0.0285895	0	0.0164956	0.0156041	0.00949148					CHOL					DOPG					DOTAP
20	Apolipoprotein D OS=Homo sapiens GN=APOD PE=1 SV=1	APOD_HUMAN	21	4.79	Homo sapiens	0.0238169	0.0462239	0.0262298	0.0346972	0.0367484	0.0253576	0.0193908	0.0165984	0.0204514	0.0164033	0.0298587	0	0.0388991	0.0588208	0.0305018				N° prot	CHOL_A	CHOL_B	CHOL_C	CHOL_D	CHOL_E	DOPG_A	DOPG_B	DOPG_C	DOPG_D	DOPG_E	DOTAP_A	DOTAP_B	DOTAP_C	DOTAP_D	DOTAP_E
21	Inter-alpha-trypsin inhibitor heavy chain H2 OS=Homo sapiens GN=ITIH2 PE=1 SV=2	ITIH2_HUMAN	106	6.85	Homo sapiens	0.00035763	0	0	0	0	0	0	0	0.00165768	0	0.0199782	0	0.00764006	0.00760452	0.00898774			>300	4	0.00438289	0.00876527	0.00264829	0.00522853	0.00419518	0.00701593	0.00525965	0.00164181	0.0050737	0.00423517	0.00749721	0	0.00548497	0.00530152	0.00342887
22	Fibrinogen gamma chain OS=Homo sapiens GN=FGG PE=1 SV=3	FIBG_HUMAN	52	5.32	Homo sapiens	0.00605774	0.00408716	0	0.00784512	0.00853908	0.0118089	0.00729875	0.00410218	0.0134564	0.00684092	0.0128594	0	0.0116832	0.0152518	0.0120016			150-300	12	0.0234333	0.0230557	0.0173368	0.0237862	0.0292326	0.00816778	0.0160031	0.00610519	0.0218742	0.0110447	0.05583	0	0.051189	0.0455515	0.0511178
23	Serotransferrin OS=Homo sapiens GN=TF PE=1 SV=3	TRFE_HUMAN	77	7.13	Homo sapiens	0.00264254	0.00272788	0.00178753	0.026507	0.0111352	0	0.00432003	0.00100116	0.0207898	0.00203691	0.00384634	0	0.00380712	0.00422108	0.00575962			100-150	11	0.0135209	0.00769605	0.00461976	0.00783516	0.0123594	0.00499039	0.00504576	0.0059389	0.0136382	0.00489744	0.0639008	0	0.0341843	0.0368146	0.0356029
24	Hyaluronan-binding protein 2 OS=Homo sapiens GN=HABP2 PE=1 SV=1	HABP2_HUMAN	63	6.52	Homo sapiens	0.00090259	0	0	0	0	0	0	0	0	0	0.0175575	0	0.0150856	0.0208461	0.0170736			80-100	11	0.00399231	0.00331819	0	0.00876521	0.00453569	0.00364971	0.00420135	0.000900564	0.0120445	0.00226332	0.0282534	0	0.0200275	0.017298	0.0168476
25	CD5 antigen-like OS=Homo sapiens GN=CD5L PE=1 SV=1	CD5L_HUMAN	38	5.15	Homo sapiens	0.0136442	0.0160753	0.0313621	0.013005	0.0334874	0.0110493	0.0108506	0.0346561	0.00883807	0.0151224	0.00537942	0	0.00971999	0.00615963	0.00994013			70-80	12	0.0100628	0.00272788	0.00178753	0.0273074	0.013633	0	0.00480226	0.00100116	0.0238712	0.00203691	0.0673459	0	0.0499672	0.032807	0.0393878
26	Inter-alpha-trypsin inhibitor heavy chain H1 OS=Homo sapiens GN=ITIH1 PE=1 SV=3	ITIH1_HUMAN	101	6.78	Homo sapiens	0	0	0	0	0	0	0	0	0.000836702	0	0.0154749	0	0.0073938	0.00566344	0.0064238			60-70	19	0.155942	0.17402	0.169244	0.206002	0.186365	0.0847072	0.116078	0.183998	0.130573	0.0929929	0.111049	0	0.0981483	0.174864	0.108145
27	Ig gamma-2 chain C region OS=Homo sapiens GN=IGHG2 PE=1 SV=2	IGHG2_HUMAN	36	7.66	Homo sapiens	0.0432622	0.0679008	0	0	0.0229338	0.0797481	0.0703619	0.0532569	0.0439359	0.0851994	0.0189484	0	0.0238392	0	0.0287396			50-60	28	0.103204	0.104356	0.0729616	0.067101	0.0536166	0.0623741	0.0522404	0.0793232	0.0759202	0.0498061	0.143673	0	0.123645	0.155622	0.158613
28	Apolipoprotein A-I OS=Homo sapiens GN=APOA1 PE=1 SV=1	APOA1_HUMAN	31	5.5	Homo sapiens	0.0107831	0.00341319	0.0103306	0.0319222	0	0	0.00526148	0.00811884	0.0181456	0	0.0222779	0	0.0182657	0.0155207	0.0145714			40-50	14	0.123142	0.139067	0.145238	0.125359	0.167024	0.0980412	0.0951077	0.149528	0.11037	0.117548	0.11131	0	0.128483	0.101477	0.100705
29	Keratin, type II cytoskeletal 2 epidermal OS=Homo sapiens GN=KRT2 PE=1 SV=2	K22E_HUMAN	65	8.17	Homo sapiens	0.0165461	0.0158538	0.0247309	0.0143084	0.0108762	0.0101795	0.00930661	0.0172934	0.00427293	0.00835818	0.00402155	0	0.00246497	0.00940053	0.00480064			30-40	21	0.174559	0.221466	0.150849	0.141402	0.196338	0.187793	0.213145	0.198428	0.227485	0.237608	0.152829	0	0.169454	0.147702	0.170438
30	Serum paraoxonase/arylesterase 1 OS=Homo sapiens GN=PON1 PE=1 SV=3	PON1_HUMAN	40	4.89	Homo sapiens	0.00278037	0	0	0	0	0	0	0	0	0	0.021092	0	0.0268187	0.0269798	0.0158087			20-30	22	0.0768903	0.083239	0.0533066	0.0486959	0.0730475	0.088119	0.0747256	0.0389543	0.07346	0.0717928	0.101486	0	0.113155	0.11652	0.105646
31	Plasminogen OS=Homo sapiens GN=PLG PE=1 SV=2	PLMN_HUMAN	91	7.25	Homo sapiens	0.00224293	0.000890512	0	0	0	0.00245445	0.00290405	0.000429666	0.00479318	0.00137883	0.00689363	0	0.00499695	0.00442963	0.00866411			<20	46	0.310871	0.232289	0.382008	0.338518	0.259652	0.455142	0.413391	0.334181	0.305691	0.405775	0.156826	0	0.206262	0.166042	0.210068
32	Hornerin OS=Homo sapiens GN=HRNR PE=1 SV=2	HORN_HUMAN	282	10.24	Homo sapiens	0.00393488	0.00217847	0.00251811	0.00289752	0	0.00086021	0.00291598	0.00267503	0.000595689	0.000963868	0	0	0	9.19953e-05	0.000116391			tot	200	1	1	1	1	1	1	1	1	1	1	1	0	1	1	1
33	Vitamin K-dependent protein S OS=Homo sapiens GN=PROS1 PE=1 SV=1	PROS_HUMAN	75	5.37	Homo sapiens	0	0	0	0	0	0	0	0	0	0	0.012745	0	0.0102525	0.00727919	0.00613195
34	Keratin, type I cytoskeletal 16 OS=Homo sapiens GN=KRT16 PE=1 SV=4	K1C16_HUMAN	51	4.69	Homo sapiens	0.015308	0.0330075	0.0175624	0.00733515	0.00648662	0.0110638	0.00919568	0.0223845	0.00396065	0.00799444	0.00248639	0	0.000810391	0.00535202	0.00112577
35	Ceruloplasmin OS=Homo sapiens GN=CP PE=1 SV=1	CERU_HUMAN	122	5.5	Homo sapiens	0	0	0	0.000708562	0	0	0	0	0.00371412	0	0.00624285	0	0.00418029	0.00415736	0.00397192
36	Alpha-1-antitrypsin OS=Homo sapiens GN=SERPINA1 PE=1 SV=3	A1AT_HUMAN	47	5.31	Homo sapiens	0	0.0017882	0	0.0242063	0	0	0.00247307	0	0.0146771	0	0.0106324	0	0.00607502	0.00442435	0.00436757
37	Cartilage oligomeric matrix protein OS=Homo sapiens GN=COMP PE=1 SV=2	COMP_HUMAN	83	4.16	Homo sapiens	0	0	0	0	0	0	0	0	0	0	0.0105241	0	0.00847904	0.00642306	0.0049473
38	Fibronectin OS=Homo sapiens GN=FN1 PE=1 SV=4	FINC_HUMAN	263	5.45	Homo sapiens	0	0	0	0	0	0	0.000151487	0	0.00150402	0.000198232	0.00264772	0	0.00143183	0.00118696	0.0012803
39	Complement C5 OS=Homo sapiens GN=C5 PE=1 SV=4	CO5_HUMAN	188	6.49	Homo sapiens	0.00108733	0.000670575	0	0	0	0	0.000623071	0	0.000625575	0	0.00329576	0	0.00193085	0.00138309	0.00218376
40	Apolipoprotein E OS=Homo sapiens GN=APOE PE=1 SV=1	APOE_HUMAN	36	5.42	Homo sapiens	0.00463395	0	0	0	0	0	0	0	0.00163345	0	0.0146766	0	0.013764	0.0184247	0.0157396
41	Fibrinogen alpha chain OS=Homo sapiens GN=FGA PE=1 SV=2	FIBA_HUMAN	95	5.87	Homo sapiens	0.00174938	0.000884689	0	0.00705477	0.00281533	0.00119526	0.0012973	0	0.00364561	0	0.00623398	0	0.0024201	0.00287388	0.00172868
42	Keratin, type II cytoskeletal 6A OS=Homo sapiens GN=KRT6A PE=1 SV=3	K2C6A_HUMAN	60	8.16	Homo sapiens	0.0126591	0.0185834	0.0141572	0.00575463	0.007807	0.00940847	0.00796646	0.0255081	0.000830582	0.00573993	0	0	0	0.00606717	0
43	Immunoglobulin lambda-like polypeptide 5 OS=Homo sapiens GN=IGLL5 PE=2 SV=2	IGLL5_HUMAN	23	9.05	Homo sapiens	0.0289441	0.0193192	0.0058744	0	0.0148847	0.0449086	0.0302322	0	0.0248235	0.0332112	0.00671443	0	0.0154036	0.00451177	0.0224919
44	Ig alpha-1 chain C region OS=Homo sapiens GN=IGHA1 PE=1 SV=2	IGHA1_HUMAN	38	6.49	Homo sapiens	0.00633561	0.00772549	0.00422442	0.00916845	0.0029879	0.00467225	0.00546238	0.00357206	0.00953282	0.00412743	0.00628678	0	0.00458565	0.00718455	0.0060524
45	Complement C1q subcomponent subunit C OS=Homo sapiens GN=C1QC PE=1 SV=3	C1QC_HUMAN	26	8.58	Homo sapiens	0.0113622	0.0113288	0.0167436	0	0.0125908	0.011196	0.0114609	0.0156528	0.00453615	0.0108742	0.00403797	0	0.0050963	0.00550314	0.00442135
46	Inter-alpha-trypsin inhibitor heavy chain H3 OS=Homo sapiens GN=ITIH3 PE=1 SV=2	ITIH3_HUMAN	100	5.49	Homo sapiens	0	0	0	0	0	0	0	0	0	0	0.00479272	0	0.00363039	0.00572127	0.00476308
47	Keratin, type II cytoskeletal 5 OS=Homo sapiens GN=KRT5 PE=1 SV=3	K2C5_HUMAN	62	7.91	Homo sapiens	0.0131578	0.0133133	0.0129605	0.0112907	0.0049703	0.00648898	0.00557708	0.0187401	0.00363931	0.00488999	0.000916735	0	0	0.00629085	0.00304684
48	Kininogen-1 OS=Homo sapiens GN=KNG1 PE=1 SV=2	KNG1_HUMAN	72	6.8	Homo sapiens	0	0	0	0.000800413	0	0	0	0	0.00139812	0	0.0093735	0	0.00397963	0.00306956	0.00330747
49	Ficolin-3 OS=Homo sapiens GN=FCN3 PE=1 SV=2	FCN3_HUMAN	33	6.66	Homo sapiens	0.00109158	0.00889602	0.00343639	0	0.022499	0	0.00376332	0	0	0.00856018	0.00233443	0	0.00992637	0.00236684	0.0121927
50	Apolipoprotein C-III OS=Homo sapiens GN=APOC3 PE=1 SV=1	APOC3_HUMAN	11	5.04	Homo sapiens	0.0134709	0.00754527	0.00826204	0	0	0	0	0	0	0	0.0307605	0	0.0164809	0.0141896	0.0350789
51	Keratin, type I cytoskeletal 14 OS=Homo sapiens GN=KRT14 PE=1 SV=4	K1C14_HUMAN	52	4.81	Homo sapiens	0.0142241	0.024245	0.0150361	0.00554132	0	0.0118089	0.00932605	0.0242057	0.00535693	0.00823865	0	0	0	0.00725003	0
52	Histidine-rich glycoprotein OS=Homo sapiens GN=HRG PE=1 SV=1	HRG_HUMAN	60	7.52	Homo sapiens	0	0	0	0	0	0.00483008	0.00178817	0	0.00363382	0	0.00681935	0	0.00454808	0.00346628	0.00314703
53	Coagulation factor IX OS=Homo sapiens GN=F9 PE=1 SV=2	FA9_HUMAN	52	5.16	Homo sapiens	0	0	0	0	0	0	0	0	0	0	0.00784561	0	0.00659184	0.00700173	0.0067902
54	Apolipoprotein(a) OS=Homo sapiens GN=LPA PE=1 SV=1	APOA_HUMAN	501	5.77	Homo sapiens	0.00014632	0.00113737	0.000411992	0.00104633	0.000116764	0	0.000479802	0	0.000571856	0.000168518	2.72121e-05	0	0.000320901	0.000337082	0.00024603
55	Protein AMBP OS=Homo sapiens GN=AMBP PE=1 SV=1	AMBP_HUMAN	39	6.15	Homo sapiens	0	0	0	0	0	0	0	0	0.00194224	0	0.0106753	0	0.00840251	0.00666857	0.00863494
56	Immunoglobulin J chain OS=Homo sapiens GN=IGJ PE=1 SV=4	IGJ_HUMAN	18	4.87	Homo sapiens	0.0102859	0.0105438	0.016563	0.00497044	0.0166577	0.00894597	0.0100995	0.0150512	0.00557893	0.00985362	0.00233827	0	0.00661934	0.00216735	0.00684112
57	Clusterin OS=Homo sapiens GN=CLU PE=1 SV=1	CLUS_HUMAN	52	6.21	Homo sapiens	0	0	0	0	0	0	0	0	0.00193989	0	0.00597504	0	0.00779912	0.00500258	0.00268521
58	Apolipoprotein A-IV OS=Homo sapiens GN=APOA4 PE=1 SV=3	APOA4_HUMAN	45	5.05	Homo sapiens	0	0	0	0	0	0	0	0	0.00485517	0	0.00549314	0	0.0091678	0.00780058	0.00456254
59	Properdin OS=Homo sapiens GN=CFP PE=1 SV=2	PROP_HUMAN	51	7.92	Homo sapiens	0.00617652	0.00496177	0.0080865	0	0.0118198	0	0.00304091	0.00227821	0.00115063	0.00510552	0	0	0.000697206	0.000509966	0.00112903
60	Complement component C9 OS=Homo sapiens GN=C9 PE=1 SV=2	CO9_HUMAN	63	5.27	Homo sapiens	0	0	0	0	0	0	0	0	0	0	0.00570005	0	0.00343068	0.00742972	0.00560528
61	C4b-binding protein beta chain OS=Homo sapiens GN=C4BPB PE=1 SV=1	C4BPB_HUMAN	28	4.8	Homo sapiens	0	0	0	0	0.00196575	0	0.00149047	0	0	0.0022406	0.0113181	0	0.0102183	0.0125378	0.00528066
62	Complement C1s subcomponent OS=Homo sapiens GN=C1S PE=1 SV=1	C1S_HUMAN	77	4.59	Homo sapiens	0	0	0	0	0	0	0	0	0	0	0.0046632	0	0.00532766	0.00152016	0.00191969
63	Ig kappa chain V-III region HAH OS=Homo sapiens PE=2 SV=1	KV312_HUMAN	14	4.59	Homo sapiens	0.00807868	0.00289416	0.00655427	0	0	0.0115851	0.0217191	0	0.0138672	0.0171501	0.00803486	0	0	0	0
64	Ig heavy chain V-III region TRO OS=Homo sapiens PE=1 SV=1	HV301_HUMAN	13	10	Homo sapiens	0	0	0	0	0	0	0	0	0.00515291	0	0	0	0	0	0
65	Alpha-1-antichymotrypsin OS=Homo sapiens GN=SERPINA3 PE=1 SV=2	AACT_HUMAN	48	5.19	Homo sapiens	0	0	0	0	0	0	0	0	0.00385266	0	0.00585388	0	0.0046573	0.00325235	0.00308033
66	Ig heavy chain V-III region 23 OS=Homo sapiens GN=IGHV3-23 PE=1 SV=2	HV303_HUMAN	13	8.46	Homo sapiens	0.00578405	0.00467519	0.0264936	0	0.00948181	0.0124666	0.0153534	0	0.0103595	0.00971547	0	0	0.00862704	0	0.00632712
67	Ig heavy chain V-III region WAS OS=Homo sapiens PE=1 SV=1	HV315_HUMAN	13	8.84	Homo sapiens	0	0	0	0	0	0	0.00342364	0	0	0	0	0	0.00633588	0	0
68	Heparin cofactor 2 OS=Homo sapiens GN=SERPIND1 PE=1 SV=3	HEP2_HUMAN	57	6.89	Homo sapiens	0	0	0	0	0	0	0	0	0.00190962	0	0.00518772	0	0.00208808	0.00228169	0.00331556
69	Ig alpha-2 chain C region OS=Homo sapiens GN=IGHA2 PE=1 SV=3	IGHA2_HUMAN	37	6.02	Homo sapiens	0.00950421	0.00615552	0.00676024	0	0	0.00386058	0.00558444	0	0.00287539	0	0.00283848	0	0.00659749	0.0119471	0.00354947
70	Apolipoprotein M OS=Homo sapiens GN=APOM PE=1 SV=2	APOM_HUMAN	21	5.92	Homo sapiens	0	0	0	0	0	0	0	0	0	0	0.0107406	0	0.010621	0.00557833	0.0074266
71	Thrombospondin-1 OS=Homo sapiens GN=THBS1 PE=1 SV=2	TSP1_HUMAN	129	4.51	Homo sapiens	0	0	0	0	0	0	0	0	0	0	0.00136126	0	0.00178976	0.0019146	0.00235518
72	Alpha-2-HS-glycoprotein OS=Homo sapiens GN=AHSG PE=1 SV=1	FETUA_HUMAN	39	5.52	Homo sapiens	0	0	0	0.00152937	0	0	0	0	0.0015078	0	0.00684504	0	0.00429848	0.00433327	0.00336622
73	Vitamin D-binding protein OS=Homo sapiens GN=GC PE=1 SV=1	VTDB_HUMAN	53	5.21	Homo sapiens	0	0	0	0.00661164	0	0	0	0	0.00604503	0	0.00479464	0	0.000254401	0.00147183	0.0018593
74	Coagulation factor X OS=Homo sapiens GN=F10 PE=1 SV=2	FA10_HUMAN	55	5.74	Homo sapiens	0	0	0	0	0	0	0	0	0	0	0.00447997	0	0.00318125	0.00401931	0.00343313
75	Ig kappa chain V-I region EU OS=Homo sapiens PE=1 SV=1	KV106_HUMAN	12	8.46	Homo sapiens	0.0123484	0.0105438	0.00757354	0	0	0.0107525	0.0171416	0	0.00773439	0.0217816	0	0	0.00925137	0	0
76	Alpha-1-acid glycoprotein 1 OS=Homo sapiens GN=ORM1 PE=1 SV=1	A1AG1_HUMAN	24	4.66	Homo sapiens	0	0	0	0.00727935	0	0	0	0	0.00878644	0	0.00968204	0	0.00377076	0.00162142	0.00137081
77	Complement C1q subcomponent subunit B OS=Homo sapiens GN=C1QB PE=1 SV=3	C1QB_HUMAN	27	8.87	Homo sapiens	0.00688062	0.00150068	0	0	0	0	0.00761851	0	0.00251916	0.00462284	0.00182864	0	0.00310681	0	0.00243118
78	Haptoglobin-related protein OS=Homo sapiens GN=HPR PE=2 SV=2	HPTR_HUMAN	39	7.11	Homo sapiens	0.00340207	0	0.0064473	0	0.00149997	0.00372876	0.00527435	0	0.0163898	0.00455843	0.019098	0	0.0131092	0.00434369	0.00842392
79	Galectin-3-binding protein OS=Homo sapiens GN=LGALS3BP PE=1 SV=1	LG3BP_HUMAN	65	4.9	Homo sapiens	0.00144842	0.00132318	0.00246344	0	0.00810645	0	0.00139128	0.000591929	0	0.0020946	0.000221937	0	0.00107014	0	0.00139014
80	Coagulation factor V OS=Homo sapiens GN=F5 PE=1 SV=4	FA5_HUMAN	252	5.95	Homo sapiens	0	0	0	0	0	0.000253952	0.000228746	0	0.00020039	0.000248956	0.000534106	0	0.000639805	0.000412974	6.52869e-05
81	Complement component C8 alpha chain OS=Homo sapiens GN=C8A PE=1 SV=2	CO8A_HUMAN	65	6.41	Homo sapiens	0	0	0	0	0	0	0.000368158	0	0.000911658	0	0.00227767	0	0.00171442	0.00440118	0.00404325
82	Ig kappa chain V-I region AU OS=Homo sapiens PE=1 SV=1	KV102_HUMAN	12	4.34	Homo sapiens	0	0	0	0	0	0	0.00667609	0	0	0	0	0	0	0	0
83	Beta-2-glycoprotein 1 OS=Homo sapiens GN=APOH PE=1 SV=3	APOH_HUMAN	38	8.03	Homo sapiens	0	0	0	0	0	0	0.00175063	0.0127284	0.00553739	0.0016529	0	0	0.000354822	0	0.000432956
84	C-reactive protein OS=Homo sapiens GN=CRP PE=1 SV=1	CRP_HUMAN	25	5.32	Homo sapiens	0	0	0	0	0	0	0	0	0	0	0.00646293	0	0.0042164	0.00312052	0.00854331
85	Vitamin K-dependent protein Z OS=Homo sapiens GN=PROZ PE=1 SV=2	PROZ_HUMAN	45	5.87	Homo sapiens	0	0	0	0	0	0	0	0	0	0	0.00375961	0	0.00386297	0	0.00437976
86	Complement C1q subcomponent subunit A OS=Homo sapiens GN=C1QA PE=1 SV=2	C1QA_HUMAN	26	9.45	Homo sapiens	0.00289203	0.00486635	0.00445883	0.0067194	0.00685787	0.00310153	0.00382056	0.00670319	0.00194224	0.0044406	0	0	0	0	0
87	Thrombospondin-4 OS=Homo sapiens GN=THBS4 PE=1 SV=2	TSP4_HUMAN	106	4.23	Homo sapiens	0	0	0	0	0	0	0	0	0	0	0.00232554	0	0.00197022	0.00245291	0.00224695
88	Complement C1r subcomponent OS=Homo sapiens GN=C1R PE=1 SV=2	C1R_HUMAN	80	6.14	Homo sapiens	0	0	0	0	0	0	0	0	0	0	0.00219999	0	0.00157936	0.00227618	0.00102669
89	Hemopexin OS=Homo sapiens GN=HPX PE=1 SV=2	HEMO_HUMAN	52	7.02	Homo sapiens	0	0	0	0.00559176	0	0	0.000765765	0	0.00680657	0	0.000535436	0	0.000672513	0	0
90	Transthyretin OS=Homo sapiens GN=TTR PE=1 SV=1	TTHY_HUMAN	16	5.58	Homo sapiens	0	0	0	0	0	0	0	0	0.00211791	0	0.00925302	0	0.00870525	0.0154382	0.00667828
91	Filamin-A OS=Homo sapiens GN=FLNA PE=1 SV=4	FLNA_HUMAN	281	5.95	Homo sapiens	0	0	0	0	0.00219242	0	0.000119978	0	0.000478831	0	0	0	0	0.00018507	8.78237e-05
92	Dermcidin OS=Homo sapiens GN=DCD PE=1 SV=2	DCD_HUMAN	11	6.52	Homo sapiens	0.00338945	0	0.0250958	0.0106432	0	0.00579489	0.00460315	0.0123178	0.00459075	0.00570335	0.0038426	0	0	0.00827131	0.0029911
93	Keratin, type I cytoskeletal 17 OS=Homo sapiens GN=KRT17 PE=1 SV=2	K1C17_HUMAN	48	4.67	Homo sapiens	0.0111572	0.0157639	0.00663527	0	0	0	0.00533897	0.0169312	0	0.00149647	0	0	0	0	0.000685406
94	Ig kappa chain V-II region RPMI 6410 OS=Homo sapiens PE=4 SV=1	KV206_HUMAN	15	9.53	Homo sapiens	0.0111215	0	0	0	0	0.00332879	0	0	0	0	0	0	0	0	0
95	Ig heavy chain V-III region GAL OS=Homo sapiens PE=1 SV=1	HV320_HUMAN	13	8.7	Homo sapiens	0.00578405	0.00829004	0.010585	0	0	0.011196	0.00511888	0.00295964	0.00452339	0.0104543	0	0	0.00534089	0	0.00252479
96	Ig gamma-4 chain C region OS=Homo sapiens GN=IGHG4 PE=1 SV=1	IGHG4_HUMAN	36	7.41	Homo sapiens	0	0	0	0	0	0	0.00883935	0	0.0273726	0	0.01215	0	0.0137417	0.0198658	0.0171082
97	Vitamin K-dependent protein C OS=Homo sapiens GN=PROC PE=1 SV=1	PROC_HUMAN	52	6.23	Homo sapiens	0	0	0	0	0	0	0	0	0	0	0.00257174	0	0.0024217	0.00250097	0.00157874
98	Apolipoprotein C-II OS=Homo sapiens GN=APOC2 PE=1 SV=1	APOC2_HUMAN	11	4.36	Homo sapiens	0.00344625	0	0	0	0	0	0	0	0	0	0.0185049	0	0.00445825	0	0.00597482
99	Ig kappa chain V-IV region (Fragment) OS=Homo sapiens GN=IGKV4-1 PE=4 SV=1	KV401_HUMAN (+1)	13	4.85	Homo sapiens	0.005687	0	0	0	0	0.012377	0.00702916	0	0.00646563	0.00556471	0	0	0.00480954	0	0.00883954
100	Ig heavy chain V-III region WEA OS=Homo sapiens PE=1 SV=1	HV302_HUMAN	12	8.7	Homo sapiens	0	0	0	0	0	0	0.00398838	0	0	0	0	0	0	0	0
101	Protein Z-dependent protease inhibitor OS=Homo sapiens GN=SERPINA10 PE=1 SV=1	ZPI_HUMAN	51	8.58	Homo sapiens	0	0	0	0	0	0	0	0	0	0	0.00110953	0	0.00232549	0.0022945	0.0035419
102	Phosphatidylcholine-sterol acyltransferase OS=Homo sapiens GN=LCAT PE=1 SV=1	LCAT_HUMAN	50	6.04	Homo sapiens	0	0	0	0	0	0	0	0	0	0	0.00184076	0	0.00280761	0.00363884	0.00180638
103	Ig lambda chain V-III region LOI OS=Homo sapiens PE=1 SV=1	LV302_HUMAN	12	4.72	Homo sapiens	0.0107688	0	0	0	0	0.013516	0.00687136	0	0.0083684	0.004304	0.00417147	0	0.00285791	0	0
104	Actin, cytoplasmic 1 OS=Homo sapiens GN=ACTB PE=1 SV=1	ACTB_HUMAN (+1)	42	5.16	Homo sapiens	0.00485209	0	0	0	0.00139283	0	0.00215317	0	0	0	0.0011687	0	0	0.00185745	0.00175971
105	Inter-alpha-trypsin inhibitor heavy chain H4 OS=Homo sapiens GN=ITIH4 PE=1 SV=4	ITIH4_HUMAN	103	6.97	Homo sapiens	0	0	0	0	0	0	0	0.000373547	0.00131073	0	0.00102419	0	0.000750566	0.000883344	0
106	Apolipoprotein A-II OS=Homo sapiens GN=APOA2 PE=1 SV=1	APOA2_HUMAN	11	6.6	Homo sapiens	0	0	0	0.0104599	0	0	0	0	0.0115292	0	0.00449832	0	0.00445825	0	0.00522336
107	Mannan-binding lectin serine protease 1 OS=Homo sapiens GN=MASP1 PE=1 SV=3	MASP1_HUMAN	79	5.18	Homo sapiens	0	0	0	0	0	0	0	0	0	0	0.000975141	0	0.00326596	0	0
108	Ficolin-2 OS=Homo sapiens GN=FCN2 PE=1 SV=2	FCN2_HUMAN	34	6.77	Homo sapiens	0	0	0.00672124	0	0	0	0.00245301	0	0.000515265	0.0018452	0	0	0.000835148	0	0
109	Secreted phosphoprotein 24 OS=Homo sapiens GN=SPP2 PE=1 SV=1	SPP24_HUMAN	24	8.46	Homo sapiens	0	0	0	0	0	0	0	0	0	0	0.00352238	0	0.00465545	0.0075834	0.00615734
110	Complement component C8 gamma chain OS=Homo sapiens GN=C8G PE=1 SV=3	CO8G_HUMAN	22	8.48	Homo sapiens	0	0	0	0	0	0	0	0	0	0	0.00353767	0	0.00380712	0.00531907	0.00821446
111	Alpha-1B-glycoprotein OS=Homo sapiens GN=A1BG PE=1 SV=4	A1BG_HUMAN	54	5.71	Homo sapiens	0	0	0	0	0	0	0	0	0.00201346	0	0.00207778	0	0.00141061	0.00048042	0
112	Serum amyloid P-component OS=Homo sapiens GN=APCS PE=1 SV=2	SAMP_HUMAN	25	6.52	Homo sapiens	0.00144089	0	0	0	0	0	0.000712116	0	0	0	0.00169074	0	0.00196163	0.00519964	0.00196759
113	Protein S100-A9 OS=Homo sapiens GN=S100A9 PE=1 SV=1	S10A9_HUMAN	13	6.07	Homo sapiens	0	0	0	0.0157329	0	0	0.00504611	0	0.00125905	0.00398601	0	0	0	0	0
114	Tropomyosin alpha-4 chain OS=Homo sapiens GN=TPM4 PE=1 SV=3	TPM4_HUMAN	29	4.36	Homo sapiens	0	0	0	0	0	0	0	0	0	0	0	0	0.00505867	0.00672413	0.00254855
115	Ig kappa chain V-III region VG (Fragment) OS=Homo sapiens PE=1 SV=1	KV309_HUMAN	13	4.59	Homo sapiens	0	0	0	0	0	0	0	0	0	0.00236804	0	0	0	0	0
116	Complement component C8 beta chain OS=Homo sapiens GN=C8B PE=1 SV=3	CO8B_HUMAN	67	8.17	Homo sapiens	0	0	0	0	0	0	0	0	0	0	0.000844571	0	0.000301863	0.000971663	0.00294163
117	Ig heavy chain V-II region ARH-77 OS=Homo sapiens PE=4 SV=1	HV209_HUMAN	16	8.45	Homo sapiens	0	0	0	0	0	0.00309711	0.00260833	0	0.00258032	0.00261709	0	0	0	0	0
118	Ig lambda chain V-I region HA OS=Homo sapiens PE=1 SV=1	LV102_HUMAN	12	5.6	Homo sapiens	0	0	0	0	0	0.00275299	0.00480189	0	0.00284422	0.00609738	0	0	0.00287915	0	0.00272833
119	Complement C4-B OS=Homo sapiens GN=C4B PE=1 SV=2	CO4B_HUMAN	193	7.28	Homo sapiens	0	0	0	0	0	0	0	0	0	0	0.0109758	0	0.0120971	0.00444701	0.0101711
120	Alpha-2-antiplasmin OS=Homo sapiens GN=SERPINF2 PE=1 SV=3	A2AP_HUMAN	55	6.24	Homo sapiens	0	0	0	0	0	0	0	0	0	0	0.0023108	0	0.000390681	0	0.00119644
121	Ig lambda chain V-I region NIG-64 OS=Homo sapiens PE=1 SV=1	LV104_HUMAN	11	5.69	Homo sapiens	0	0	0.0103459	0	0.00531809	0	0	0	0.00148796	0	0.00129176	0	0	0	0
122	Ig heavy chain V-I region V35 OS=Homo sapiens PE=1 SV=1	HV103_HUMAN	13	9.87	Homo sapiens	0	0	0	0	0	0.00490337	0.00122391	0	0.00127782	0	0	0	0	0	0
123	Filaggrin OS=Homo sapiens GN=FLG PE=1 SV=3	FILA_HUMAN	435	9.6	Homo sapiens	0	0	0.000368101	0	0	0	0.000340358	0	0	9.62608e-05	0	0	0	0	0
124	Alpha-1-acid glycoprotein 2 OS=Homo sapiens GN=ORM2 PE=1 SV=2	A1AG2_HUMAN	24	4.76	Homo sapiens	0	0	0	0	0	0	0	0	0.00487635	0	0.00762482	0	0.00319673	0	0
125	Filaggrin-2 OS=Homo sapiens GN=FLG2 PE=1 SV=1	FILA2_HUMAN	248	8.35	Homo sapiens	0	0.000338893	0.000833919	0	0	0	0.000340028	0.000468502	0	0	0	0	0	0	0
126	Ig heavy chain V-III region GA OS=Homo sapiens PE=1 SV=1	HV308_HUMAN	13	10.02	Homo sapiens	0.00578405	0	0	0	0	0	0.00244782	0	0	0	0	0	0	0	0
127	Lumican OS=Homo sapiens GN=LUM PE=1 SV=2	LUM_HUMAN	38	6.6	Homo sapiens	0	0	0	0	0	0	0	0	0	0	0.00314718	0	0.00237381	0.000685846	0.00129663
128	Phosphatidylinositol-glycan-specific phospholipase D OS=Homo sapiens GN=GPLD1 PE=1 SV=3	PHLD_HUMAN	92	6.33	Homo sapiens	0	0	0	0	0	0	0	0	0	0	0.000686031	0	0.00150896	0.000847968	0
129	Antithrombin-III OS=Homo sapiens GN=SERPINC1 PE=1 SV=1	ANT3_HUMAN	53	6.68	Homo sapiens	0	0	0	0	0	0	0	0	0.00316096	0	0.00133985	0	0	0	0
130	Complement factor B OS=Homo sapiens GN=CFB PE=1 SV=2	CFAB_HUMAN	86	7.07	Homo sapiens	0	0	0	0.00171044	0	0	0	0	0.00195858	0	0.000732634	0	0	0	0
131	Ig lambda chain V-III region SH OS=Homo sapiens PE=1 SV=1	LV301_HUMAN	11	6.5	Homo sapiens	0	0	0	0	0	0	0.00677281	0	0.00375319	0	0	0	0	0	0.00448676
132	Desmoplakin OS=Homo sapiens GN=DSP PE=1 SV=3	DESP_HUMAN	332	6.78	Homo sapiens	0	0	0.000135654	0	0	0	0	0.000816761	0	0	0	0	0	0	0
133	Protein S100-A8 OS=Homo sapiens GN=S100A8 PE=1 SV=1	S10A8_HUMAN	11	7.07	Homo sapiens	0	0	0.00614141	0.0237226	0	0.00719071	0	0	0	0	0	0	0	0	0
134	Lysozyme C OS=Homo sapiens GN=LYZ PE=1 SV=1	LYSC_HUMAN	17	9.35	Homo sapiens	0.0044231	0.00256042	0	0	0	0.0039014	0.00187437	0	0	0	0	0	0	0	0
135	ATP synthase subunit beta, mitochondrial OS=Homo sapiens GN=ATP5B PE=1 SV=3	ATPB_HUMAN	57	5.07	Homo sapiens	0.000654104	0	0	0	0	0.00197168	0.000559024	0	0.00102951	0.00146369	0	0	0	0	0.000575829
136	Integrin beta-3 OS=Homo sapiens GN=ITGB3 PE=1 SV=2	ITB3_HUMAN	87	4.85	Homo sapiens	0	0	0	0	0	0	0	0	0.000964726	0	0	0	0	0.000447287	0.000283616
137	Small proline-rich protein 2A OS=Homo sapiens GN=SPRR2A PE=1 SV=1	SPR2A_HUMAN (+4)	8	8.49	Homo sapiens	0.0139019	0	0.00562963	0.0143824	0	0	0.00298328	0	0	0.00384807	0	0	0	0	0
138	Heat shock 70 kDa protein 1-like OS=Homo sapiens GN=HSPA1L PE=1 SV=2	HS71L_HUMAN	70	5.82	Homo sapiens	0.00346182	0	0	0	0.00171151	0	0.000482235	0	0	0	0	0	0	0.000742926	0
139	Ig kappa chain V-III region B6 OS=Homo sapiens PE=1 SV=1	KV301_HUMAN	12	9.53	Homo sapiens	0	0	0	0	0	0	0.00265892	0	0.00207645	0	0	0	0	0	0
140	Angiotensinogen OS=Homo sapiens GN=AGT PE=1 SV=1	ANGT_HUMAN	53	6.27	Homo sapiens	0	0	0	0	0	0	0	0	0.000952797	0	0.00160048	0	0.000270283	0	0
141	Complement component C6 OS=Homo sapiens GN=C6 PE=1 SV=3	CO6_HUMAN	105	6.74	Homo sapiens	0	0	0	0	0	0	0	0	0	0	0.00181048	0	0	0	0
142	Beta-Ala-His dipeptidase OS=Homo sapiens GN=CNDP1 PE=1 SV=4	CNDP1_HUMAN	57	4.95	Homo sapiens	0	0	0	0	0	0	0	0	0	0	0	0	0.00341707	0	0
143	Protein S100-A7 OS=Homo sapiens GN=S100A7 PE=1 SV=4	S10A7_HUMAN	11	6.78	Homo sapiens	0	0	0	0.0104599	0	0	0.00289676	0	0.00223194	0	0	0	0	0	0
144	Lipopolysaccharide-binding protein OS=Homo sapiens GN=LBP PE=1 SV=3	LBP_HUMAN	53	6.68	Homo sapiens	0	0	0	0	0	0	0.00123732	0.0025611	0.000643975	0	0	0	0	0	0
145	Gelsolin OS=Homo sapiens GN=GSN PE=1 SV=1	GELS_HUMAN	86	6.19	Homo sapiens	0	0	0	0	0	0	0	0	0.000682349	0	0.00098299	0	0.000743634	0	0
146	Calmodulin-like protein 5 OS=Homo sapiens GN=CALML5 PE=1 SV=2	CALL5_HUMAN	16	4.05	Homo sapiens	0.00462069	0	0.00292017	0	0	0	0	0	0	0	0	0	0	0	0
147	Calreticulin OS=Homo sapiens GN=CALR PE=1 SV=1	CALR_HUMAN	48	4.04	Homo sapiens	0	0	0	0	0	0	0	0	0	0	0.00131489	0	0.000293126	0	0
148	Trypsin-1 OS=Homo sapiens GN=PRSS1 PE=1 SV=1	TRY1_HUMAN	27	6.49	Homo sapiens	0	0	0	0	0	0.00355533	0	0	0.00187031	0	0	0	0	0	0
149	Phospholipid transfer protein OS=Homo sapiens GN=PLTP PE=1 SV=1	PLTP_HUMAN	55	7.01	Homo sapiens	0	0	0	0	0	0	0	0	0	0	0	0	0.00190356	0.000472877	0
150	Neutrophil defensin 1 OS=Homo sapiens GN=DEFA1 PE=1 SV=1	DEF1_HUMAN (+1)	10	7.04	Homo sapiens	0	0	0	0	0	0.00307079	0.00337564	0	0	0.00422138	0	0	0	0	0
151	Elongation factor 1-alpha 1 OS=Homo sapiens GN=EEF1A1 PE=1 SV=1	EF1A1_HUMAN (+2)	50	9.5	Homo sapiens	0.00333645	0	0	0	0.00415108	0	0	0	0	0	0	0	0	0	0
152	Extracellular superoxide dismutase [Cu-Zn] OS=Homo sapiens GN=SOD3 PE=1 SV=2	SODE_HUMAN	26	6.59	Homo sapiens	0	0	0	0	0	0	0	0	0	0	0	0	0.00264935	0	0.00157879
153	Serum paraoxonase/lactonase 3 OS=Homo sapiens GN=PON3 PE=1 SV=3	PON3_HUMAN	40	5.1	Homo sapiens	0	0	0	0	0	0	0	0	0	0	0	0	0.00311983	0	0
154	Ig kappa chain V-III region CLL OS=Homo sapiens PE=4 SV=2	KV308_HUMAN	14	8.7	Homo sapiens	0	0	0	0	0	0	0.00170473	0	0.00360702	0.00152503	0	0	0	0	0
155	Retinol-binding protein 4 OS=Homo sapiens GN=RBP4 PE=1 SV=3	RET4_HUMAN	23	5.85	Homo sapiens	0	0	0	0	0	0	0	0	0.00365449	0	0.000926699	0	0	0	0
156	Ig kappa chain V-III region IARC/BL41 OS=Homo sapiens PE=4 SV=1	KV311_HUMAN	14	4.59	Homo sapiens	0	0	0	0	0	0	0.00582369	0	0	0	0	0	0	0	0
157	Polymeric immunoglobulin receptor OS=Homo sapiens GN=PIGR PE=1 SV=4	PIGR_HUMAN	83	5.43	Homo sapiens	0	0	0	0	0.00172036	0	0	0	0	0.000884483	0	0	0	0	0.000197228
158	Resistin OS=Homo sapiens GN=RETN PE=2 SV=1	RETN_HUMAN	11	6.89	Homo sapiens	0	0	0	0	0	0.00579489	0.00161845	0	0.00536488	0.00189668	0	0	0	0	0
159	Complement factor H-related protein 1 OS=Homo sapiens GN=CFHR1 PE=1 SV=2	FHR1_HUMAN	38	7.42	Homo sapiens	0	0	0	0	0	0	0	0	0.00352568	0	0	0	0	0	0
160	Serum amyloid A-2 protein OS=Homo sapiens GN=SAA2 PE=1 SV=1	SAA2_HUMAN	14	9.48	Homo sapiens	0	0	0	0	0	0	0	0	0	0	0.00651754	0	0.00196809	0	0.00234426
161	Mannan-binding lectin serine protease 2 OS=Homo sapiens GN=MASP2 PE=1 SV=4	MASP2_HUMAN	76	5.37	Homo sapiens	0	0	0	0	0	0	0	0	0	0	0.000651073	0	0.00091525	0	0.000216478
162	Apolipoprotein C-I OS=Homo sapiens GN=APOC1 PE=1 SV=1	APOC1_HUMAN	9	9.17	Homo sapiens	0	0	0	0	0	0	0	0	0	0	0	0	0.00159166	0	0.00182803
163	Desmocollin-1 OS=Homo sapiens GN=DSC1 PE=1 SV=2	DSC1_HUMAN	100	5.08	Homo sapiens	0.000372839	0.000840454	0	0	0	0	0.000178029	0	0	0	0	0	0	0	0
164	Apolipoprotein F OS=Homo sapiens GN=APOF PE=1 SV=2	APOF_HUMAN	35	5.36	Homo sapiens	0	0	0	0	0	0	0	0	0	0	0	0	0.000787237	0	0.000701569
165	Ubiquitin-60S ribosomal protein L40 OS=Homo sapiens GN=UBA52 PE=1 SV=2	RL40_HUMAN (+3)	15	10.51	Homo sapiens	0.00741433	0	0	0	0	0	0	0	0	0	0	0	0	0	0
166	Hemoglobin subunit beta OS=Homo sapiens GN=HBB PE=1 SV=2	HBB_HUMAN	16	7.32	Homo sapiens	0	0	0	0	0	0	0	0	0	0	0.00264179	0	0	0	0
167	Ig heavy chain V-III region BUT OS=Homo sapiens PE=1 SV=1	HV306_HUMAN	12	9.48	Homo sapiens	0	0	0	0	0	0	0.00265892	0	0	0	0	0	0	0	0
168	Plasma protease C1 inhibitor OS=Homo sapiens GN=SERPING1 PE=1 SV=2	IC1_HUMAN	55	6.52	Homo sapiens	0	0	0	0	0	0	0	0	0.00107298	0	0	0	0	0	0.000299133
169	Hemoglobin subunit alpha OS=Homo sapiens GN=HBA1 PE=1 SV=2	HBA_HUMAN	15	9.09	Homo sapiens	0	0	0	0	0	0	0	0	0	0	0.000947292	0	0	0	0
170	Mannose-binding protein C OS=Homo sapiens GN=MBL2 PE=1 SV=2	MBL2_HUMAN	26	5.14	Homo sapiens	0	0	0	0	0	0	0	0	0	0	0.0016188	0	0	0	0.0015772
171	Desmoglein-1 OS=Homo sapiens GN=DSG1 PE=1 SV=2	DSG1_HUMAN	114	4.66	Homo sapiens	0	0	0	0	0	0	0	0.0015288	0	0	0	0	0	0	0
172	Erythrocyte band 7 integral membrane protein OS=Homo sapiens GN=STOM PE=1 SV=3	STOM_HUMAN	32	8.07	Homo sapiens	0	0	0	0	0	0	0.000556341	0	0.00128634	0.000641345	0	0	0	0	0
173	Collectin-11 OS=Homo sapiens GN=COLEC11 PE=1 SV=1	COL11_HUMAN	29	5.06	Homo sapiens	0	0	0	0	0	0	0	0	0	0	0.000470113	0	0.000493965	0	0.00113455
174	Coagulation factor XII OS=Homo sapiens GN=F12 PE=1 SV=3	FA12_HUMAN	68	7.76	Homo sapiens	0	0	0	0	0	0	0.000234611	0	0.000862971	0	0	0	0	0	0
175	Pigment epithelium-derived factor OS=Homo sapiens GN=SERPINF1 PE=1 SV=4	PEDF_HUMAN	46	6.33	Homo sapiens	0	0	0	0	0	0	0	0	0.000361122	0	0.00123014	0	0	0	0.000355869
176	Keratin, type II cytoskeletal 6C OS=Homo sapiens GN=KRT6C PE=1 SV=3	K2C6C_HUMAN	60	8.16	Homo sapiens	0	0.00601796	0	0	0	0	0.00796646	0	0	0	0	0	0	0	0
177	Adenosylhomocysteinase OS=Homo sapiens GN=AHCY PE=1 SV=4	SAHH_HUMAN	48	6.29	Homo sapiens	0.000789767	0	0	0	0	0	0	0	0	0	0	0	0	0	0
178	Zinc-alpha-2-glycoprotein OS=Homo sapiens GN=AZGP1 PE=1 SV=2	ZA2G_HUMAN	34	5.92	Homo sapiens	0	0	0	0	0	0	0	0	0.00298383	0	0	0	0	0	0
179	ATP synthase subunit alpha, mitochondrial OS=Homo sapiens GN=ATP5A1 PE=1 SV=1	ATPA_HUMAN	60	9.56	Homo sapiens	0	0	0	0	0	0.000554798	0	0	0	0	0	0	0	0	0
180	Complement factor I OS=Homo sapiens GN=CFI PE=1 SV=2	CFAI_HUMAN	66	7.53	Homo sapiens	0	0	0	0	0	0	0	0	0	0	0.0010683	0	0	0	0
181	Afamin OS=Homo sapiens GN=AFM PE=1 SV=1	AFAM_HUMAN	69	5.7	Homo sapiens	0	0	0	0	0	0	0	0	0.000731859	0	0.000505447	0	0	0	0
182	Junction plakoglobin OS=Homo sapiens GN=JUP PE=1 SV=3	PLAK_HUMAN	82	6.05	Homo sapiens	0	0.00154299	0	0	0	0	0	0.000470898	0	0	0	0	0	0	0
183	Plasma kallikrein OS=Homo sapiens GN=KLKB1 PE=1 SV=1	KLKB1_HUMAN	71	8.26	Homo sapiens	0	0	0	0	0	0	0	0	0.000233967	0	0	0	0	0	0.000231687
184	Collectin-10 OS=Homo sapiens GN=COLEC10 PE=2 SV=2	COL10_HUMAN	31	7.39	Homo sapiens	0	0	0	0	0	0	0	0	0	0	0	0	0.000462096	0	0
185	Suprabasin OS=Homo sapiens GN=SBSN PE=1 SV=2	SBSN_HUMAN	61	7.01	Homo sapiens	0	0	0	0	0	0	0.000291851	0	0	0	0	0	0	0	0
186	Serum amyloid A-4 protein OS=Homo sapiens GN=SAA4 PE=1 SV=2	SAA4_HUMAN	15	9.38	Homo sapiens	0	0	0	0	0	0	0	0	0	0	0	0	0.000954999	0	0
187	Aggrecan core protein OS=Homo sapiens GN=ACAN PE=1 SV=2	PGCA_HUMAN	250	3.82	Homo sapiens	0	0	0	0	0	0	0	0	0	0	0	0	8.08994e-05	0	0
188	Ig kappa chain V-I region Lay OS=Homo sapiens PE=1 SV=1	KV113_HUMAN	12	4.53	Homo sapiens	0	0	0	0	0	0	0	0	0	0.00440742	0	0	0	0	0
189	Endoplasmin OS=Homo sapiens GN=HSP90B1 PE=1 SV=1	ENPL_HUMAN	92	4.48	Homo sapiens	0	0	0	0	0	0	0	0	0	0	0	0	0.000299492	0	0
190	Coagulation factor VII OS=Homo sapiens GN=F7 PE=1 SV=1	FA7_HUMAN	52	7.23	Homo sapiens	0	0	0	0	0	0	0	0	0	0	0.000273257	0	0	0	0
191	Carboxypeptidase N catalytic chain OS=Homo sapiens GN=CPN1 PE=1 SV=1	CBPN_HUMAN	52	7.36	Homo sapiens	0	0	0	0	0	0	0	0	0	0	0.000550679	0	0	0	0
192	Glutathione peroxidase 3 OS=Homo sapiens GN=GPX3 PE=1 SV=2	GPX3_HUMAN	26	8.29	Homo sapiens	0	0	0	0	0	0	0	0	0	0	0.000524357	0	0	0	0
193	Glyceraldehyde-3-phosphate dehydrogenase OS=Homo sapiens GN=GAPDH PE=1 SV=3	G3P_HUMAN	36	8.73	Homo sapiens	0.0026152	0	0	0	0	0	0	0	0	0	0	0	0	0	0
194	Myosin-9 OS=Homo sapiens GN=MYH9 PE=1 SV=4	MYH9_HUMAN	227	5.29	Homo sapiens	0	0	0	0	0	0	0	0	0	0	0	0	0	0.000114811	0
195	Tetranectin OS=Homo sapiens GN=CLEC3B PE=1 SV=3	TETN_HUMAN	23	5.36	Homo sapiens	0	0	0	0	0	0	0	0	0	0	0.000926699	0	0	0	0
196	GTP-binding nuclear protein Ran OS=Homo sapiens GN=RAN PE=1 SV=3	RAN_HUMAN	24	7.59	Homo sapiens	0.0015535	0	0	0	0	0	0	0	0	0	0	0	0	0	0
197	40S ribosomal protein S13 OS=Homo sapiens GN=RPS13 PE=1 SV=2	RS13_HUMAN	17	11.19	Homo sapiens	0.00431212	0	0	0	0	0	0	0	0	0	0	0	0	0	0
198	Cartilage acidic protein 1 OS=Homo sapiens GN=CRTAC1 PE=1 SV=2	CRAC1_HUMAN	71	4.73	Homo sapiens	0	0	0	0	0	0	0	0	0	0	0	0	0.00020176	0	0
199	Sodium-dependent phosphate transporter 2 OS=Homo sapiens GN=SLC20A2 PE=1 SV=1	S20A2_HUMAN	70	6.09	Homo sapiens	0	0	0	0	0.000786301	0	0	0	0	0	0	0	0	0	0
200	Platelet glycoprotein Ib alpha chain OS=Homo sapiens GN=GP1BA PE=1 SV=2	GP1BA_HUMAN	72	6.24	Homo sapiens	0	0	0	0	0	0	0	0	0	0	0	0	0.000195417	0	0

## Sheet: pI
						CHOL					DOPG					DOTAP
						17.9913	15.8211	14.5376	11.4512	11.2674	20.6391	40.3784	17.2142	39.6391	31.8876	47.3435	0	47.7883	25.6368	40.5912
#	Identified Proteins (200)	Accession Number	Molecular Weight	pI	Taxonomy	CHOL_A	CHOL_B	CHOL_C	CHOL_D	CHOL_E	DOPG_A	DOPG_B	DOPG_C	DOPG_D	DOPG_E	DOTAP_A	DOTAP_B	DOTAP_C	DOTAP_D	DOTAP_E
1	Apolipoprotein B-100 OS=Homo sapiens GN=APOB PE=1 SV=2	APOB_HUMAN	516	7.04	Homo sapiens	0.00423657	0.0076279	0.00173255	0.0041822	0.00407842	0.00701593	0.00443949	0.000825046	0.00450185	0.00397039	0.00747	0	0.00516407	0.00496444	0.00318284
2	Ig gamma-1 chain C region OS=Homo sapiens GN=IGHG1 PE=1 SV=1	IGHG1_HUMAN	36	8.31	Homo sapiens	0.0792865	0.1113	0.0815666	0.0857766	0.11293	0.0847341	0.0929875	0.0860958	0.0814625	0.1159	0.0281711	0	0.0383905	0.0502016	0.0396878				19	0.0721626	0.0289245	0.0132194	0.00961692	0.0258937	0.0615586	0.0481731	0.00937822	0.0358686	0.038712	0.0141793	0	0.0199183	0.00460376	0.0267806
3	Complement C3 OS=Homo sapiens GN=C3 PE=1 SV=2	CO3_HUMAN	187	6.34	Homo sapiens	0.0102963	0.0111185	0.00600493	0.00979829	0.0150568	0.003646	0.00688537	0.00155666	0.00766789	0.00688109	0.0227626	0	0.0175972	0.0194019	0.0217392				45	0.281167	0.268104	0.251963	0.18786	0.214033	0.252493	0.270549	0.223069	0.192844	0.263497	0.0950453	0	0.142259	0.135117	0.141335
4	Serum albumin OS=Homo sapiens GN=ALB PE=1 SV=2	ALBU_HUMAN	69	6.21	Homo sapiens	0.0287607	0.0253924	0.0222698	0.0945698	0.0500871	0.00893319	0.0204736	0.023579	0.0917398	0.0152987	0.026334	0	0.0228375	0.0309039	0.0221355				73	0.519465	0.539093	0.452811	0.436807	0.547576	0.551677	0.513511	0.48399	0.437584	0.550598	0.283037	0	0.355711	0.344756	0.362924
5	Ig mu chain C region OS=Homo sapiens GN=IGHM PE=1 SV=3	IGHM_HUMAN	49	6.77	Homo sapiens	0.0351288	0.0456517	0.0917703	0.0279351	0.0850879	0.0418111	0.0379909	0.0763112	0.0223504	0.0475926	0.0136452	0	0.0367245	0.0177773	0.0249725				120	0.647407	0.671832	0.63592	0.668833	0.746759	0.63547	0.63287	0.613898	0.663846	0.656677	0.522476	0	0.561817	0.545246	0.556018
6	C4b-binding protein alpha chain OS=Homo sapiens GN=C4BPA PE=1 SV=2	C4BPA_HUMAN	67	7.31	Homo sapiens	0.0152034	0.0135507	0.0123042	0.0052301	0.0597752	0.0110909	0.0231142	0.007812	0.00464438	0.0223343	0.0308924	0	0.0388493	0.0516206	0.0276991				167	0.835274	0.805297	0.843831	0.890774	0.90313	0.884307	0.868694	0.841427	0.90558	0.89224	0.853511	0	0.863978	0.839767	0.89508
7	Vitronectin OS=Homo sapiens GN=VTN PE=1 SV=1	VTNC_HUMAN	54	5.54	Homo sapiens	0.0297714	0.00658982	0	0.00160083	0.0060042	0	0.00136213	0	0.00249169	0.00174269	0.0554887	0	0.0449092	0.062365	0.0878951				200	1	1	1	1	1	1	1	1	1	1	1	0	1	1	1
8	Keratin, type II cytoskeletal 1 OS=Homo sapiens GN=KRT1 PE=1 SV=6	K2C1_HUMAN	66	8.33	Homo sapiens	0.0348742	0.0436345	0.05043	0.0476146	0.0270158	0.0220331	0.0220085	0.0498735	0.0115628	0.0199654	0.00937046	0	0.00571067	0.0208841	0.010699
9	Ig kappa chain C region OS=Homo sapiens GN=IGKC PE=1 SV=1	IGKC_HUMAN	12	5.68	Homo sapiens	0.0943107	0.0911032	0.147199	0.126411	0.0930728	0.219805	0.198126	0.180652	0.137804	0.202796	0.0288041	0	0.064506	0.0574162	0.0547557
10	Complement C4-A OS=Homo sapiens GN=C4A PE=1 SV=2	CO4A_HUMAN	193	7.08	Homo sapiens	0.00401904	0.00305504	0.0024977	0.00286388	0.00555042	0.00340762	0.00331873	0.001405	0.00228242	0.00211076	0.0104294	0	0.0118795	0.012665	0.00983101
11	Complement factor H OS=Homo sapiens GN=CFH PE=1 SV=4	CFAH_HUMAN	139	6.59	Homo sapiens	0.0127904	0.0068556	0.00461976	0.0071266	0.0123594	0.00499039	0.00486773	0.00403655	0.00611892	0.00489744	0.0108907	0	0.00682919	0.00841711	0.00685425
12	Keratin, type I cytoskeletal 9 OS=Homo sapiens GN=KRT9 PE=1 SV=3	K1C9_HUMAN	62	4.89	Homo sapiens	0.0323896	0.0363505	0.0299282	0.027234	0.017727	0.0111881	0.0155906	0.0406004	0.00774298	0.0143119	0.00451925	0	0.0021351	0.0125814	0.00556303					CHOL					DOPG					DOTAP
13	Fibrinogen beta chain OS=Homo sapiens GN=FGB PE=1 SV=2	FIBB_HUMAN	56	8.38	Homo sapiens	0.0069622	0.00711304	0	0.0104063	0.00743771	0.0158708	0.00809128	0.00311096	0.015929	0.00708829	0.0238978	0	0.0265711	0.0222883	0.0221426				N° prot	CHOL_A	CHOL_B	CHOL_C	CHOL_D	CHOL_E	DOPG_A	DOPG_B	DOPG_C	DOPG_D	DOPG_E	DOTAP_A	DOTAP_B	DOTAP_C	DOTAP_D	DOTAP_E
14	Ig lambda-3 chain C regions OS=Homo sapiens GN=IGLC3 PE=1 SV=1	LAC3_HUMAN	11	7.34	Homo sapiens	0.0859388	0.0941336	0.108645	0.121736	0.135122	0.114662	0.0647453	0.1232	0.0611154	0.0874846	0.0352194	0	0.0564173	0.0685595	0.0634463			>9	19	0.0721626	0.0289245	0.0132194	0.00961692	0.0258937	0.0615586	0.0481731	0.00937822	0.0358686	0.038712	0.0141793	0	0.0199183	0.00460376	0.0267806
15	Alpha-2-macroglobulin OS=Homo sapiens GN=A2M PE=1 SV=3	A2MG_HUMAN	163	6.43	Homo sapiens	0.00409572	0.00569421	0.00548215	0.00822646	0.00643296	0	0.00141973	0	0.00851943	0.000641781	0.00518456	0	0.0055318	0.00566265	0.00564293			08_09	26	0.209004	0.23918	0.238744	0.178243	0.18814	0.190934	0.222375	0.213691	0.156975	0.224785	0.080866	0	0.12234	0.130513	0.114554
16	Ig gamma-3 chain C region OS=Homo sapiens GN=IGHG3 PE=1 SV=2	IGHG3_HUMAN	41	7.95	Homo sapiens	0.0564632	0.0628275	0.0402443	0.0461126	0.0766582	0.055496	0.0405713	0.0519726	0.0373372	0.063811	0.0185306	0	0.021268	0.0237816	0.0312407			07_08	28	0.238298	0.270989	0.200847	0.248948	0.333543	0.299185	0.242963	0.260921	0.24474	0.287101	0.187992	0	0.213453	0.209638	0.221589
17	Prothrombin OS=Homo sapiens GN=F2 PE=1 SV=2	THRB_HUMAN	70	5.7	Homo sapiens	0.00395848	0	0	0	0	0	0	0	0.00144929	0	0.0350916	0	0.0220219	0.0159741	0.0218209			06_07	47	0.127942	0.132739	0.183109	0.232026	0.199183	0.0837927	0.119359	0.129908	0.226261	0.106078	0.239438	0	0.206106	0.20049	0.193093
18	Keratin, type I cytoskeletal 10 OS=Homo sapiens GN=KRT10 PE=1 SV=6	K1C10_HUMAN	59	4.88	Homo sapiens	0.0207137	0.0243516	0.0322767	0.0221689	0.00917804	0.00985004	0.0113635	0.0206806	0.00800006	0.0113319	0.00644775	0	0.00343971	0.0134399	0.00723719			05_06	47	0.187867	0.133465	0.207911	0.221941	0.156371	0.248837	0.235824	0.227529	0.241735	0.235564	0.331035	0	0.302161	0.294521	0.339062
19	Haptoglobin OS=Homo sapiens GN=HP PE=1 SV=1	HPT_HUMAN	45	6.56	Homo sapiens	0.0119709	0.0130359	0.00658849	0.0271046	0.00388548	0.00073413	0.00658026	0.00431279	0.0269359	0.00464772	0.0285895	0	0.0164956	0.0156041	0.00949148			<5	33	0.164726	0.194703	0.156169	0.109226	0.0968701	0.115693	0.131306	0.158573	0.0944197	0.10776	0.146489	0	0.136022	0.160233	0.10492
20	Apolipoprotein D OS=Homo sapiens GN=APOD PE=1 SV=1	APOD_HUMAN	21	4.79	Homo sapiens	0.0238169	0.0462239	0.0262298	0.0346972	0.0367484	0.0253576	0.0193908	0.0165984	0.0204514	0.0164033	0.0298587	0	0.0388991	0.0588208	0.0305018			tot	200	1	1	1	1	1	1	1	1	1	1	1	0	1	1	1
21	Inter-alpha-trypsin inhibitor heavy chain H2 OS=Homo sapiens GN=ITIH2 PE=1 SV=2	ITIH2_HUMAN	106	6.85	Homo sapiens	0.00035763	0	0	0	0	0	0	0	0.00165768	0	0.0199782	0	0.00764006	0.00760452	0.00898774
22	Fibrinogen gamma chain OS=Homo sapiens GN=FGG PE=1 SV=3	FIBG_HUMAN	52	5.32	Homo sapiens	0.00605774	0.00408716	0	0.00784512	0.00853908	0.0118089	0.00729875	0.00410218	0.0134564	0.00684092	0.0128594	0	0.0116832	0.0152518	0.0120016
23	Serotransferrin OS=Homo sapiens GN=TF PE=1 SV=3	TRFE_HUMAN	77	7.13	Homo sapiens	0.00264254	0.00272788	0.00178753	0.026507	0.0111352	0	0.00432003	0.00100116	0.0207898	0.00203691	0.00384634	0	0.00380712	0.00422108	0.00575962
24	Hyaluronan-binding protein 2 OS=Homo sapiens GN=HABP2 PE=1 SV=1	HABP2_HUMAN	63	6.52	Homo sapiens	0.00090259	0	0	0	0	0	0	0	0	0	0.0175575	0	0.0150856	0.0208461	0.0170736
25	CD5 antigen-like OS=Homo sapiens GN=CD5L PE=1 SV=1	CD5L_HUMAN	38	5.15	Homo sapiens	0.0136442	0.0160753	0.0313621	0.013005	0.0334874	0.0110493	0.0108506	0.0346561	0.00883807	0.0151224	0.00537942	0	0.00971999	0.00615963	0.00994013
26	Inter-alpha-trypsin inhibitor heavy chain H1 OS=Homo sapiens GN=ITIH1 PE=1 SV=3	ITIH1_HUMAN	101	6.78	Homo sapiens	0	0	0	0	0	0	0	0	0.000836702	0	0.0154749	0	0.0073938	0.00566344	0.0064238
27	Ig gamma-2 chain C region OS=Homo sapiens GN=IGHG2 PE=1 SV=2	IGHG2_HUMAN	36	7.66	Homo sapiens	0.0432622	0.0679008	0	0	0.0229338	0.0797481	0.0703619	0.0532569	0.0439359	0.0851994	0.0189484	0	0.0238392	0	0.0287396
28	Apolipoprotein A-I OS=Homo sapiens GN=APOA1 PE=1 SV=1	APOA1_HUMAN	31	5.5	Homo sapiens	0.0107831	0.00341319	0.0103306	0.0319222	0	0	0.00526148	0.00811884	0.0181456	0	0.0222779	0	0.0182657	0.0155207	0.0145714
29	Keratin, type II cytoskeletal 2 epidermal OS=Homo sapiens GN=KRT2 PE=1 SV=2	K22E_HUMAN	65	8.17	Homo sapiens	0.0165461	0.0158538	0.0247309	0.0143084	0.0108762	0.0101795	0.00930661	0.0172934	0.00427293	0.00835818	0.00402155	0	0.00246497	0.00940053	0.00480064
30	Serum paraoxonase/arylesterase 1 OS=Homo sapiens GN=PON1 PE=1 SV=3	PON1_HUMAN	40	4.89	Homo sapiens	0.00278037	0	0	0	0	0	0	0	0	0	0.021092	0	0.0268187	0.0269798	0.0158087
31	Plasminogen OS=Homo sapiens GN=PLG PE=1 SV=2	PLMN_HUMAN	91	7.25	Homo sapiens	0.00224293	0.000890512	0	0	0	0.00245445	0.00290405	0.000429666	0.00479318	0.00137883	0.00689363	0	0.00499695	0.00442963	0.00866411
32	Hornerin OS=Homo sapiens GN=HRNR PE=1 SV=2	HORN_HUMAN	282	10.24	Homo sapiens	0.00393488	0.00217847	0.00251811	0.00289752	0	0.00086021	0.00291598	0.00267503	0.000595689	0.000963868	0	0	0	9.19953e-05	0.000116391
33	Vitamin K-dependent protein S OS=Homo sapiens GN=PROS1 PE=1 SV=1	PROS_HUMAN	75	5.37	Homo sapiens	0	0	0	0	0	0	0	0	0	0	0.012745	0	0.0102525	0.00727919	0.00613195
34	Keratin, type I cytoskeletal 16 OS=Homo sapiens GN=KRT16 PE=1 SV=4	K1C16_HUMAN	51	4.69	Homo sapiens	0.015308	0.0330075	0.0175624	0.00733515	0.00648662	0.0110638	0.00919568	0.0223845	0.00396065	0.00799444	0.00248639	0	0.000810391	0.00535202	0.00112577
35	Ceruloplasmin OS=Homo sapiens GN=CP PE=1 SV=1	CERU_HUMAN	122	5.5	Homo sapiens	0	0	0	0.000708562	0	0	0	0	0.00371412	0	0.00624285	0	0.00418029	0.00415736	0.00397192
36	Alpha-1-antitrypsin OS=Homo sapiens GN=SERPINA1 PE=1 SV=3	A1AT_HUMAN	47	5.31	Homo sapiens	0	0.0017882	0	0.0242063	0	0	0.00247307	0	0.0146771	0	0.0106324	0	0.00607502	0.00442435	0.00436757
37	Cartilage oligomeric matrix protein OS=Homo sapiens GN=COMP PE=1 SV=2	COMP_HUMAN	83	4.16	Homo sapiens	0	0	0	0	0	0	0	0	0	0	0.0105241	0	0.00847904	0.00642306	0.0049473
38	Fibronectin OS=Homo sapiens GN=FN1 PE=1 SV=4	FINC_HUMAN	263	5.45	Homo sapiens	0	0	0	0	0	0	0.000151487	0	0.00150402	0.000198232	0.00264772	0	0.00143183	0.00118696	0.0012803
39	Complement C5 OS=Homo sapiens GN=C5 PE=1 SV=4	CO5_HUMAN	188	6.49	Homo sapiens	0.00108733	0.000670575	0	0	0	0	0.000623071	0	0.000625575	0	0.00329576	0	0.00193085	0.00138309	0.00218376
40	Apolipoprotein E OS=Homo sapiens GN=APOE PE=1 SV=1	APOE_HUMAN	36	5.42	Homo sapiens	0.00463395	0	0	0	0	0	0	0	0.00163345	0	0.0146766	0	0.013764	0.0184247	0.0157396
41	Fibrinogen alpha chain OS=Homo sapiens GN=FGA PE=1 SV=2	FIBA_HUMAN	95	5.87	Homo sapiens	0.00174938	0.000884689	0	0.00705477	0.00281533	0.00119526	0.0012973	0	0.00364561	0	0.00623398	0	0.0024201	0.00287388	0.00172868
42	Keratin, type II cytoskeletal 6A OS=Homo sapiens GN=KRT6A PE=1 SV=3	K2C6A_HUMAN	60	8.16	Homo sapiens	0.0126591	0.0185834	0.0141572	0.00575463	0.007807	0.00940847	0.00796646	0.0255081	0.000830582	0.00573993	0	0	0	0.00606717	0
43	Immunoglobulin lambda-like polypeptide 5 OS=Homo sapiens GN=IGLL5 PE=2 SV=2	IGLL5_HUMAN	23	9.05	Homo sapiens	0.0289441	0.0193192	0.0058744	0	0.0148847	0.0449086	0.0302322	0	0.0248235	0.0332112	0.00671443	0	0.0154036	0.00451177	0.0224919
44	Ig alpha-1 chain C region OS=Homo sapiens GN=IGHA1 PE=1 SV=2	IGHA1_HUMAN	38	6.49	Homo sapiens	0.00633561	0.00772549	0.00422442	0.00916845	0.0029879	0.00467225	0.00546238	0.00357206	0.00953282	0.00412743	0.00628678	0	0.00458565	0.00718455	0.0060524
45	Complement C1q subcomponent subunit C OS=Homo sapiens GN=C1QC PE=1 SV=3	C1QC_HUMAN	26	8.58	Homo sapiens	0.0113622	0.0113288	0.0167436	0	0.0125908	0.011196	0.0114609	0.0156528	0.00453615	0.0108742	0.00403797	0	0.0050963	0.00550314	0.00442135
46	Inter-alpha-trypsin inhibitor heavy chain H3 OS=Homo sapiens GN=ITIH3 PE=1 SV=2	ITIH3_HUMAN	100	5.49	Homo sapiens	0	0	0	0	0	0	0	0	0	0	0.00479272	0	0.00363039	0.00572127	0.00476308
47	Keratin, type II cytoskeletal 5 OS=Homo sapiens GN=KRT5 PE=1 SV=3	K2C5_HUMAN	62	7.91	Homo sapiens	0.0131578	0.0133133	0.0129605	0.0112907	0.0049703	0.00648898	0.00557708	0.0187401	0.00363931	0.00488999	0.000916735	0	0	0.00629085	0.00304684
48	Kininogen-1 OS=Homo sapiens GN=KNG1 PE=1 SV=2	KNG1_HUMAN	72	6.8	Homo sapiens	0	0	0	0.000800413	0	0	0	0	0.00139812	0	0.0093735	0	0.00397963	0.00306956	0.00330747
49	Ficolin-3 OS=Homo sapiens GN=FCN3 PE=1 SV=2	FCN3_HUMAN	33	6.66	Homo sapiens	0.00109158	0.00889602	0.00343639	0	0.022499	0	0.00376332	0	0	0.00856018	0.00233443	0	0.00992637	0.00236684	0.0121927
50	Apolipoprotein C-III OS=Homo sapiens GN=APOC3 PE=1 SV=1	APOC3_HUMAN	11	5.04	Homo sapiens	0.0134709	0.00754527	0.00826204	0	0	0	0	0	0	0	0.0307605	0	0.0164809	0.0141896	0.0350789
51	Keratin, type I cytoskeletal 14 OS=Homo sapiens GN=KRT14 PE=1 SV=4	K1C14_HUMAN	52	4.81	Homo sapiens	0.0142241	0.024245	0.0150361	0.00554132	0	0.0118089	0.00932605	0.0242057	0.00535693	0.00823865	0	0	0	0.00725003	0
52	Histidine-rich glycoprotein OS=Homo sapiens GN=HRG PE=1 SV=1	HRG_HUMAN	60	7.52	Homo sapiens	0	0	0	0	0	0.00483008	0.00178817	0	0.00363382	0	0.00681935	0	0.00454808	0.00346628	0.00314703
53	Coagulation factor IX OS=Homo sapiens GN=F9 PE=1 SV=2	FA9_HUMAN	52	5.16	Homo sapiens	0	0	0	0	0	0	0	0	0	0	0.00784561	0	0.00659184	0.00700173	0.0067902
54	Apolipoprotein(a) OS=Homo sapiens GN=LPA PE=1 SV=1	APOA_HUMAN	501	5.77	Homo sapiens	0.00014632	0.00113737	0.000411992	0.00104633	0.000116764	0	0.000479802	0	0.000571856	0.000168518	2.72121e-05	0	0.000320901	0.000337082	0.00024603
55	Protein AMBP OS=Homo sapiens GN=AMBP PE=1 SV=1	AMBP_HUMAN	39	6.15	Homo sapiens	0	0	0	0	0	0	0	0	0.00194224	0	0.0106753	0	0.00840251	0.00666857	0.00863494
56	Immunoglobulin J chain OS=Homo sapiens GN=IGJ PE=1 SV=4	IGJ_HUMAN	18	4.87	Homo sapiens	0.0102859	0.0105438	0.016563	0.00497044	0.0166577	0.00894597	0.0100995	0.0150512	0.00557893	0.00985362	0.00233827	0	0.00661934	0.00216735	0.00684112
57	Clusterin OS=Homo sapiens GN=CLU PE=1 SV=1	CLUS_HUMAN	52	6.21	Homo sapiens	0	0	0	0	0	0	0	0	0.00193989	0	0.00597504	0	0.00779912	0.00500258	0.00268521
58	Apolipoprotein A-IV OS=Homo sapiens GN=APOA4 PE=1 SV=3	APOA4_HUMAN	45	5.05	Homo sapiens	0	0	0	0	0	0	0	0	0.00485517	0	0.00549314	0	0.0091678	0.00780058	0.00456254
59	Properdin OS=Homo sapiens GN=CFP PE=1 SV=2	PROP_HUMAN	51	7.92	Homo sapiens	0.00617652	0.00496177	0.0080865	0	0.0118198	0	0.00304091	0.00227821	0.00115063	0.00510552	0	0	0.000697206	0.000509966	0.00112903
60	Complement component C9 OS=Homo sapiens GN=C9 PE=1 SV=2	CO9_HUMAN	63	5.27	Homo sapiens	0	0	0	0	0	0	0	0	0	0	0.00570005	0	0.00343068	0.00742972	0.00560528
61	C4b-binding protein beta chain OS=Homo sapiens GN=C4BPB PE=1 SV=1	C4BPB_HUMAN	28	4.8	Homo sapiens	0	0	0	0	0.00196575	0	0.00149047	0	0	0.0022406	0.0113181	0	0.0102183	0.0125378	0.00528066
62	Complement C1s subcomponent OS=Homo sapiens GN=C1S PE=1 SV=1	C1S_HUMAN	77	4.59	Homo sapiens	0	0	0	0	0	0	0	0	0	0	0.0046632	0	0.00532766	0.00152016	0.00191969
63	Ig kappa chain V-III region HAH OS=Homo sapiens PE=2 SV=1	KV312_HUMAN	14	4.59	Homo sapiens	0.00807868	0.00289416	0.00655427	0	0	0.0115851	0.0217191	0	0.0138672	0.0171501	0.00803486	0	0	0	0
64	Ig heavy chain V-III region TRO OS=Homo sapiens PE=1 SV=1	HV301_HUMAN	13	10	Homo sapiens	0	0	0	0	0	0	0	0	0.00515291	0	0	0	0	0	0
65	Alpha-1-antichymotrypsin OS=Homo sapiens GN=SERPINA3 PE=1 SV=2	AACT_HUMAN	48	5.19	Homo sapiens	0	0	0	0	0	0	0	0	0.00385266	0	0.00585388	0	0.0046573	0.00325235	0.00308033
66	Ig heavy chain V-III region 23 OS=Homo sapiens GN=IGHV3-23 PE=1 SV=2	HV303_HUMAN	13	8.46	Homo sapiens	0.00578405	0.00467519	0.0264936	0	0.00948181	0.0124666	0.0153534	0	0.0103595	0.00971547	0	0	0.00862704	0	0.00632712
67	Ig heavy chain V-III region WAS OS=Homo sapiens PE=1 SV=1	HV315_HUMAN	13	8.84	Homo sapiens	0	0	0	0	0	0	0.00342364	0	0	0	0	0	0.00633588	0	0
68	Heparin cofactor 2 OS=Homo sapiens GN=SERPIND1 PE=1 SV=3	HEP2_HUMAN	57	6.89	Homo sapiens	0	0	0	0	0	0	0	0	0.00190962	0	0.00518772	0	0.00208808	0.00228169	0.00331556
69	Ig alpha-2 chain C region OS=Homo sapiens GN=IGHA2 PE=1 SV=3	IGHA2_HUMAN	37	6.02	Homo sapiens	0.00950421	0.00615552	0.00676024	0	0	0.00386058	0.00558444	0	0.00287539	0	0.00283848	0	0.00659749	0.0119471	0.00354947
70	Apolipoprotein M OS=Homo sapiens GN=APOM PE=1 SV=2	APOM_HUMAN	21	5.92	Homo sapiens	0	0	0	0	0	0	0	0	0	0	0.0107406	0	0.010621	0.00557833	0.0074266
71	Thrombospondin-1 OS=Homo sapiens GN=THBS1 PE=1 SV=2	TSP1_HUMAN	129	4.51	Homo sapiens	0	0	0	0	0	0	0	0	0	0	0.00136126	0	0.00178976	0.0019146	0.00235518
72	Alpha-2-HS-glycoprotein OS=Homo sapiens GN=AHSG PE=1 SV=1	FETUA_HUMAN	39	5.52	Homo sapiens	0	0	0	0.00152937	0	0	0	0	0.0015078	0	0.00684504	0	0.00429848	0.00433327	0.00336622
73	Vitamin D-binding protein OS=Homo sapiens GN=GC PE=1 SV=1	VTDB_HUMAN	53	5.21	Homo sapiens	0	0	0	0.00661164	0	0	0	0	0.00604503	0	0.00479464	0	0.000254401	0.00147183	0.0018593
74	Coagulation factor X OS=Homo sapiens GN=F10 PE=1 SV=2	FA10_HUMAN	55	5.74	Homo sapiens	0	0	0	0	0	0	0	0	0	0	0.00447997	0	0.00318125	0.00401931	0.00343313
75	Ig kappa chain V-I region EU OS=Homo sapiens PE=1 SV=1	KV106_HUMAN	12	8.46	Homo sapiens	0.0123484	0.0105438	0.00757354	0	0	0.0107525	0.0171416	0	0.00773439	0.0217816	0	0	0.00925137	0	0
76	Alpha-1-acid glycoprotein 1 OS=Homo sapiens GN=ORM1 PE=1 SV=1	A1AG1_HUMAN	24	4.66	Homo sapiens	0	0	0	0.00727935	0	0	0	0	0.00878644	0	0.00968204	0	0.00377076	0.00162142	0.00137081
77	Complement C1q subcomponent subunit B OS=Homo sapiens GN=C1QB PE=1 SV=3	C1QB_HUMAN	27	8.87	Homo sapiens	0.00688062	0.00150068	0	0	0	0	0.00761851	0	0.00251916	0.00462284	0.00182864	0	0.00310681	0	0.00243118
78	Haptoglobin-related protein OS=Homo sapiens GN=HPR PE=2 SV=2	HPTR_HUMAN	39	7.11	Homo sapiens	0.00340207	0	0.0064473	0	0.00149997	0.00372876	0.00527435	0	0.0163898	0.00455843	0.019098	0	0.0131092	0.00434369	0.00842392
79	Galectin-3-binding protein OS=Homo sapiens GN=LGALS3BP PE=1 SV=1	LG3BP_HUMAN	65	4.9	Homo sapiens	0.00144842	0.00132318	0.00246344	0	0.00810645	0	0.00139128	0.000591929	0	0.0020946	0.000221937	0	0.00107014	0	0.00139014
80	Coagulation factor V OS=Homo sapiens GN=F5 PE=1 SV=4	FA5_HUMAN	252	5.95	Homo sapiens	0	0	0	0	0	0.000253952	0.000228746	0	0.00020039	0.000248956	0.000534106	0	0.000639805	0.000412974	6.52869e-05
81	Complement component C8 alpha chain OS=Homo sapiens GN=C8A PE=1 SV=2	CO8A_HUMAN	65	6.41	Homo sapiens	0	0	0	0	0	0	0.000368158	0	0.000911658	0	0.00227767	0	0.00171442	0.00440118	0.00404325
82	Ig kappa chain V-I region AU OS=Homo sapiens PE=1 SV=1	KV102_HUMAN	12	4.34	Homo sapiens	0	0	0	0	0	0	0.00667609	0	0	0	0	0	0	0	0
83	Beta-2-glycoprotein 1 OS=Homo sapiens GN=APOH PE=1 SV=3	APOH_HUMAN	38	8.03	Homo sapiens	0	0	0	0	0	0	0.00175063	0.0127284	0.00553739	0.0016529	0	0	0.000354822	0	0.000432956
84	C-reactive protein OS=Homo sapiens GN=CRP PE=1 SV=1	CRP_HUMAN	25	5.32	Homo sapiens	0	0	0	0	0	0	0	0	0	0	0.00646293	0	0.0042164	0.00312052	0.00854331
85	Vitamin K-dependent protein Z OS=Homo sapiens GN=PROZ PE=1 SV=2	PROZ_HUMAN	45	5.87	Homo sapiens	0	0	0	0	0	0	0	0	0	0	0.00375961	0	0.00386297	0	0.00437976
86	Complement C1q subcomponent subunit A OS=Homo sapiens GN=C1QA PE=1 SV=2	C1QA_HUMAN	26	9.45	Homo sapiens	0.00289203	0.00486635	0.00445883	0.0067194	0.00685787	0.00310153	0.00382056	0.00670319	0.00194224	0.0044406	0	0	0	0	0
87	Thrombospondin-4 OS=Homo sapiens GN=THBS4 PE=1 SV=2	TSP4_HUMAN	106	4.23	Homo sapiens	0	0	0	0	0	0	0	0	0	0	0.00232554	0	0.00197022	0.00245291	0.00224695
88	Complement C1r subcomponent OS=Homo sapiens GN=C1R PE=1 SV=2	C1R_HUMAN	80	6.14	Homo sapiens	0	0	0	0	0	0	0	0	0	0	0.00219999	0	0.00157936	0.00227618	0.00102669
89	Hemopexin OS=Homo sapiens GN=HPX PE=1 SV=2	HEMO_HUMAN	52	7.02	Homo sapiens	0	0	0	0.00559176	0	0	0.000765765	0	0.00680657	0	0.000535436	0	0.000672513	0	0
90	Transthyretin OS=Homo sapiens GN=TTR PE=1 SV=1	TTHY_HUMAN	16	5.58	Homo sapiens	0	0	0	0	0	0	0	0	0.00211791	0	0.00925302	0	0.00870525	0.0154382	0.00667828
91	Filamin-A OS=Homo sapiens GN=FLNA PE=1 SV=4	FLNA_HUMAN	281	5.95	Homo sapiens	0	0	0	0	0.00219242	0	0.000119978	0	0.000478831	0	0	0	0	0.00018507	8.78237e-05
92	Dermcidin OS=Homo sapiens GN=DCD PE=1 SV=2	DCD_HUMAN	11	6.52	Homo sapiens	0.00338945	0	0.0250958	0.0106432	0	0.00579489	0.00460315	0.0123178	0.00459075	0.00570335	0.0038426	0	0	0.00827131	0.0029911
93	Keratin, type I cytoskeletal 17 OS=Homo sapiens GN=KRT17 PE=1 SV=2	K1C17_HUMAN	48	4.67	Homo sapiens	0.0111572	0.0157639	0.00663527	0	0	0	0.00533897	0.0169312	0	0.00149647	0	0	0	0	0.000685406
94	Ig kappa chain V-II region RPMI 6410 OS=Homo sapiens PE=4 SV=1	KV206_HUMAN	15	9.53	Homo sapiens	0.0111215	0	0	0	0	0.00332879	0	0	0	0	0	0	0	0	0
95	Ig heavy chain V-III region GAL OS=Homo sapiens PE=1 SV=1	HV320_HUMAN	13	8.7	Homo sapiens	0.00578405	0.00829004	0.010585	0	0	0.011196	0.00511888	0.00295964	0.00452339	0.0104543	0	0	0.00534089	0	0.00252479
96	Ig gamma-4 chain C region OS=Homo sapiens GN=IGHG4 PE=1 SV=1	IGHG4_HUMAN	36	7.41	Homo sapiens	0	0	0	0	0	0	0.00883935	0	0.0273726	0	0.01215	0	0.0137417	0.0198658	0.0171082
97	Vitamin K-dependent protein C OS=Homo sapiens GN=PROC PE=1 SV=1	PROC_HUMAN	52	6.23	Homo sapiens	0	0	0	0	0	0	0	0	0	0	0.00257174	0	0.0024217	0.00250097	0.00157874
98	Apolipoprotein C-II OS=Homo sapiens GN=APOC2 PE=1 SV=1	APOC2_HUMAN	11	4.36	Homo sapiens	0.00344625	0	0	0	0	0	0	0	0	0	0.0185049	0	0.00445825	0	0.00597482
99	Ig kappa chain V-IV region (Fragment) OS=Homo sapiens GN=IGKV4-1 PE=4 SV=1	KV401_HUMAN (+1)	13	4.85	Homo sapiens	0.005687	0	0	0	0	0.012377	0.00702916	0	0.00646563	0.00556471	0	0	0.00480954	0	0.00883954
100	Ig heavy chain V-III region WEA OS=Homo sapiens PE=1 SV=1	HV302_HUMAN	12	8.7	Homo sapiens	0	0	0	0	0	0	0.00398838	0	0	0	0	0	0	0	0
101	Protein Z-dependent protease inhibitor OS=Homo sapiens GN=SERPINA10 PE=1 SV=1	ZPI_HUMAN	51	8.58	Homo sapiens	0	0	0	0	0	0	0	0	0	0	0.00110953	0	0.00232549	0.0022945	0.0035419
102	Phosphatidylcholine-sterol acyltransferase OS=Homo sapiens GN=LCAT PE=1 SV=1	LCAT_HUMAN	50	6.04	Homo sapiens	0	0	0	0	0	0	0	0	0	0	0.00184076	0	0.00280761	0.00363884	0.00180638
103	Ig lambda chain V-III region LOI OS=Homo sapiens PE=1 SV=1	LV302_HUMAN	12	4.72	Homo sapiens	0.0107688	0	0	0	0	0.013516	0.00687136	0	0.0083684	0.004304	0.00417147	0	0.00285791	0	0
104	Actin, cytoplasmic 1 OS=Homo sapiens GN=ACTB PE=1 SV=1	ACTB_HUMAN (+1)	42	5.16	Homo sapiens	0.00485209	0	0	0	0.00139283	0	0.00215317	0	0	0	0.0011687	0	0	0.00185745	0.00175971
105	Inter-alpha-trypsin inhibitor heavy chain H4 OS=Homo sapiens GN=ITIH4 PE=1 SV=4	ITIH4_HUMAN	103	6.97	Homo sapiens	0	0	0	0	0	0	0	0.000373547	0.00131073	0	0.00102419	0	0.000750566	0.000883344	0
106	Apolipoprotein A-II OS=Homo sapiens GN=APOA2 PE=1 SV=1	APOA2_HUMAN	11	6.6	Homo sapiens	0	0	0	0.0104599	0	0	0	0	0.0115292	0	0.00449832	0	0.00445825	0	0.00522336
107	Mannan-binding lectin serine protease 1 OS=Homo sapiens GN=MASP1 PE=1 SV=3	MASP1_HUMAN	79	5.18	Homo sapiens	0	0	0	0	0	0	0	0	0	0	0.000975141	0	0.00326596	0	0
108	Ficolin-2 OS=Homo sapiens GN=FCN2 PE=1 SV=2	FCN2_HUMAN	34	6.77	Homo sapiens	0	0	0.00672124	0	0	0	0.00245301	0	0.000515265	0.0018452	0	0	0.000835148	0	0
109	Secreted phosphoprotein 24 OS=Homo sapiens GN=SPP2 PE=1 SV=1	SPP24_HUMAN	24	8.46	Homo sapiens	0	0	0	0	0	0	0	0	0	0	0.00352238	0	0.00465545	0.0075834	0.00615734
110	Complement component C8 gamma chain OS=Homo sapiens GN=C8G PE=1 SV=3	CO8G_HUMAN	22	8.48	Homo sapiens	0	0	0	0	0	0	0	0	0	0	0.00353767	0	0.00380712	0.00531907	0.00821446
111	Alpha-1B-glycoprotein OS=Homo sapiens GN=A1BG PE=1 SV=4	A1BG_HUMAN	54	5.71	Homo sapiens	0	0	0	0	0	0	0	0	0.00201346	0	0.00207778	0	0.00141061	0.00048042	0
112	Serum amyloid P-component OS=Homo sapiens GN=APCS PE=1 SV=2	SAMP_HUMAN	25	6.52	Homo sapiens	0.00144089	0	0	0	0	0	0.000712116	0	0	0	0.00169074	0	0.00196163	0.00519964	0.00196759
113	Protein S100-A9 OS=Homo sapiens GN=S100A9 PE=1 SV=1	S10A9_HUMAN	13	6.07	Homo sapiens	0	0	0	0.0157329	0	0	0.00504611	0	0.00125905	0.00398601	0	0	0	0	0
114	Tropomyosin alpha-4 chain OS=Homo sapiens GN=TPM4 PE=1 SV=3	TPM4_HUMAN	29	4.36	Homo sapiens	0	0	0	0	0	0	0	0	0	0	0	0	0.00505867	0.00672413	0.00254855
115	Ig kappa chain V-III region VG (Fragment) OS=Homo sapiens PE=1 SV=1	KV309_HUMAN	13	4.59	Homo sapiens	0	0	0	0	0	0	0	0	0	0.00236804	0	0	0	0	0
116	Complement component C8 beta chain OS=Homo sapiens GN=C8B PE=1 SV=3	CO8B_HUMAN	67	8.17	Homo sapiens	0	0	0	0	0	0	0	0	0	0	0.000844571	0	0.000301863	0.000971663	0.00294163
117	Ig heavy chain V-II region ARH-77 OS=Homo sapiens PE=4 SV=1	HV209_HUMAN	16	8.45	Homo sapiens	0	0	0	0	0	0.00309711	0.00260833	0	0.00258032	0.00261709	0	0	0	0	0
118	Ig lambda chain V-I region HA OS=Homo sapiens PE=1 SV=1	LV102_HUMAN	12	5.6	Homo sapiens	0	0	0	0	0	0.00275299	0.00480189	0	0.00284422	0.00609738	0	0	0.00287915	0	0.00272833
119	Complement C4-B OS=Homo sapiens GN=C4B PE=1 SV=2	CO4B_HUMAN	193	7.28	Homo sapiens	0	0	0	0	0	0	0	0	0	0	0.0109758	0	0.0120971	0.00444701	0.0101711
120	Alpha-2-antiplasmin OS=Homo sapiens GN=SERPINF2 PE=1 SV=3	A2AP_HUMAN	55	6.24	Homo sapiens	0	0	0	0	0	0	0	0	0	0	0.0023108	0	0.000390681	0	0.00119644
121	Ig lambda chain V-I region NIG-64 OS=Homo sapiens PE=1 SV=1	LV104_HUMAN	11	5.69	Homo sapiens	0	0	0.0103459	0	0.00531809	0	0	0	0.00148796	0	0.00129176	0	0	0	0
122	Ig heavy chain V-I region V35 OS=Homo sapiens PE=1 SV=1	HV103_HUMAN	13	9.87	Homo sapiens	0	0	0	0	0	0.00490337	0.00122391	0	0.00127782	0	0	0	0	0	0
123	Filaggrin OS=Homo sapiens GN=FLG PE=1 SV=3	FILA_HUMAN	435	9.6	Homo sapiens	0	0	0.000368101	0	0	0	0.000340358	0	0	9.62608e-05	0	0	0	0	0
124	Alpha-1-acid glycoprotein 2 OS=Homo sapiens GN=ORM2 PE=1 SV=2	A1AG2_HUMAN	24	4.76	Homo sapiens	0	0	0	0	0	0	0	0	0.00487635	0	0.00762482	0	0.00319673	0	0
125	Filaggrin-2 OS=Homo sapiens GN=FLG2 PE=1 SV=1	FILA2_HUMAN	248	8.35	Homo sapiens	0	0.000338893	0.000833919	0	0	0	0.000340028	0.000468502	0	0	0	0	0	0	0
126	Ig heavy chain V-III region GA OS=Homo sapiens PE=1 SV=1	HV308_HUMAN	13	10.02	Homo sapiens	0.00578405	0	0	0	0	0	0.00244782	0	0	0	0	0	0	0	0
127	Lumican OS=Homo sapiens GN=LUM PE=1 SV=2	LUM_HUMAN	38	6.6	Homo sapiens	0	0	0	0	0	0	0	0	0	0	0.00314718	0	0.00237381	0.000685846	0.00129663
128	Phosphatidylinositol-glycan-specific phospholipase D OS=Homo sapiens GN=GPLD1 PE=1 SV=3	PHLD_HUMAN	92	6.33	Homo sapiens	0	0	0	0	0	0	0	0	0	0	0.000686031	0	0.00150896	0.000847968	0
129	Antithrombin-III OS=Homo sapiens GN=SERPINC1 PE=1 SV=1	ANT3_HUMAN	53	6.68	Homo sapiens	0	0	0	0	0	0	0	0	0.00316096	0	0.00133985	0	0	0	0
130	Complement factor B OS=Homo sapiens GN=CFB PE=1 SV=2	CFAB_HUMAN	86	7.07	Homo sapiens	0	0	0	0.00171044	0	0	0	0	0.00195858	0	0.000732634	0	0	0	0
131	Ig lambda chain V-III region SH OS=Homo sapiens PE=1 SV=1	LV301_HUMAN	11	6.5	Homo sapiens	0	0	0	0	0	0	0.00677281	0	0.00375319	0	0	0	0	0	0.00448676
132	Desmoplakin OS=Homo sapiens GN=DSP PE=1 SV=3	DESP_HUMAN	332	6.78	Homo sapiens	0	0	0.000135654	0	0	0	0	0.000816761	0	0	0	0	0	0	0
133	Protein S100-A8 OS=Homo sapiens GN=S100A8 PE=1 SV=1	S10A8_HUMAN	11	7.07	Homo sapiens	0	0	0.00614141	0.0237226	0	0.00719071	0	0	0	0	0	0	0	0	0
134	Lysozyme C OS=Homo sapiens GN=LYZ PE=1 SV=1	LYSC_HUMAN	17	9.35	Homo sapiens	0.0044231	0.00256042	0	0	0	0.0039014	0.00187437	0	0	0	0	0	0	0	0
135	ATP synthase subunit beta, mitochondrial OS=Homo sapiens GN=ATP5B PE=1 SV=3	ATPB_HUMAN	57	5.07	Homo sapiens	0.000654104	0	0	0	0	0.00197168	0.000559024	0	0.00102951	0.00146369	0	0	0	0	0.000575829
136	Integrin beta-3 OS=Homo sapiens GN=ITGB3 PE=1 SV=2	ITB3_HUMAN	87	4.85	Homo sapiens	0	0	0	0	0	0	0	0	0.000964726	0	0	0	0	0.000447287	0.000283616
137	Small proline-rich protein 2A OS=Homo sapiens GN=SPRR2A PE=1 SV=1	SPR2A_HUMAN (+4)	8	8.49	Homo sapiens	0.0139019	0	0.00562963	0.0143824	0	0	0.00298328	0	0	0.00384807	0	0	0	0	0
138	Heat shock 70 kDa protein 1-like OS=Homo sapiens GN=HSPA1L PE=1 SV=2	HS71L_HUMAN	70	5.82	Homo sapiens	0.00346182	0	0	0	0.00171151	0	0.000482235	0	0	0	0	0	0	0.000742926	0
139	Ig kappa chain V-III region B6 OS=Homo sapiens PE=1 SV=1	KV301_HUMAN	12	9.53	Homo sapiens	0	0	0	0	0	0	0.00265892	0	0.00207645	0	0	0	0	0	0
140	Angiotensinogen OS=Homo sapiens GN=AGT PE=1 SV=1	ANGT_HUMAN	53	6.27	Homo sapiens	0	0	0	0	0	0	0	0	0.000952797	0	0.00160048	0	0.000270283	0	0
141	Complement component C6 OS=Homo sapiens GN=C6 PE=1 SV=3	CO6_HUMAN	105	6.74	Homo sapiens	0	0	0	0	0	0	0	0	0	0	0.00181048	0	0	0	0
142	Beta-Ala-His dipeptidase OS=Homo sapiens GN=CNDP1 PE=1 SV=4	CNDP1_HUMAN	57	4.95	Homo sapiens	0	0	0	0	0	0	0	0	0	0	0	0	0.00341707	0	0
143	Protein S100-A7 OS=Homo sapiens GN=S100A7 PE=1 SV=4	S10A7_HUMAN	11	6.78	Homo sapiens	0	0	0	0.0104599	0	0	0.00289676	0	0.00223194	0	0	0	0	0	0
144	Lipopolysaccharide-binding protein OS=Homo sapiens GN=LBP PE=1 SV=3	LBP_HUMAN	53	6.68	Homo sapiens	0	0	0	0	0	0	0.00123732	0.0025611	0.000643975	0	0	0	0	0	0
145	Gelsolin OS=Homo sapiens GN=GSN PE=1 SV=1	GELS_HUMAN	86	6.19	Homo sapiens	0	0	0	0	0	0	0	0	0.000682349	0	0.00098299	0	0.000743634	0	0
146	Calmodulin-like protein 5 OS=Homo sapiens GN=CALML5 PE=1 SV=2	CALL5_HUMAN	16	4.05	Homo sapiens	0.00462069	0	0.00292017	0	0	0	0	0	0	0	0	0	0	0	0
147	Calreticulin OS=Homo sapiens GN=CALR PE=1 SV=1	CALR_HUMAN	48	4.04	Homo sapiens	0	0	0	0	0	0	0	0	0	0	0.00131489	0	0.000293126	0	0
148	Trypsin-1 OS=Homo sapiens GN=PRSS1 PE=1 SV=1	TRY1_HUMAN	27	6.49	Homo sapiens	0	0	0	0	0	0.00355533	0	0	0.00187031	0	0	0	0	0	0
149	Phospholipid transfer protein OS=Homo sapiens GN=PLTP PE=1 SV=1	PLTP_HUMAN	55	7.01	Homo sapiens	0	0	0	0	0	0	0	0	0	0	0	0	0.00190356	0.000472877	0
150	Neutrophil defensin 1 OS=Homo sapiens GN=DEFA1 PE=1 SV=1	DEF1_HUMAN (+1)	10	7.04	Homo sapiens	0	0	0	0	0	0.00307079	0.00337564	0	0	0.00422138	0	0	0	0	0
151	Elongation factor 1-alpha 1 OS=Homo sapiens GN=EEF1A1 PE=1 SV=1	EF1A1_HUMAN (+2)	50	9.5	Homo sapiens	0.00333645	0	0	0	0.00415108	0	0	0	0	0	0	0	0	0	0
152	Extracellular superoxide dismutase [Cu-Zn] OS=Homo sapiens GN=SOD3 PE=1 SV=2	SODE_HUMAN	26	6.59	Homo sapiens	0	0	0	0	0	0	0	0	0	0	0	0	0.00264935	0	0.00157879
153	Serum paraoxonase/lactonase 3 OS=Homo sapiens GN=PON3 PE=1 SV=3	PON3_HUMAN	40	5.1	Homo sapiens	0	0	0	0	0	0	0	0	0	0	0	0	0.00311983	0	0
154	Ig kappa chain V-III region CLL OS=Homo sapiens PE=4 SV=2	KV308_HUMAN	14	8.7	Homo sapiens	0	0	0	0	0	0	0.00170473	0	0.00360702	0.00152503	0	0	0	0	0
155	Retinol-binding protein 4 OS=Homo sapiens GN=RBP4 PE=1 SV=3	RET4_HUMAN	23	5.85	Homo sapiens	0	0	0	0	0	0	0	0	0.00365449	0	0.000926699	0	0	0	0
156	Ig kappa chain V-III region IARC/BL41 OS=Homo sapiens PE=4 SV=1	KV311_HUMAN	14	4.59	Homo sapiens	0	0	0	0	0	0	0.00582369	0	0	0	0	0	0	0	0
157	Polymeric immunoglobulin receptor OS=Homo sapiens GN=PIGR PE=1 SV=4	PIGR_HUMAN	83	5.43	Homo sapiens	0	0	0	0	0.00172036	0	0	0	0	0.000884483	0	0	0	0	0.000197228
158	Resistin OS=Homo sapiens GN=RETN PE=2 SV=1	RETN_HUMAN	11	6.89	Homo sapiens	0	0	0	0	0	0.00579489	0.00161845	0	0.00536488	0.00189668	0	0	0	0	0
159	Complement factor H-related protein 1 OS=Homo sapiens GN=CFHR1 PE=1 SV=2	FHR1_HUMAN	38	7.42	Homo sapiens	0	0	0	0	0	0	0	0	0.00352568	0	0	0	0	0	0
160	Serum amyloid A-2 protein OS=Homo sapiens GN=SAA2 PE=1 SV=1	SAA2_HUMAN	14	9.48	Homo sapiens	0	0	0	0	0	0	0	0	0	0	0.00651754	0	0.00196809	0	0.00234426
161	Mannan-binding lectin serine protease 2 OS=Homo sapiens GN=MASP2 PE=1 SV=4	MASP2_HUMAN	76	5.37	Homo sapiens	0	0	0	0	0	0	0	0	0	0	0.000651073	0	0.00091525	0	0.000216478
162	Apolipoprotein C-I OS=Homo sapiens GN=APOC1 PE=1 SV=1	APOC1_HUMAN	9	9.17	Homo sapiens	0	0	0	0	0	0	0	0	0	0	0	0	0.00159166	0	0.00182803
163	Desmocollin-1 OS=Homo sapiens GN=DSC1 PE=1 SV=2	DSC1_HUMAN	100	5.08	Homo sapiens	0.000372839	0.000840454	0	0	0	0	0.000178029	0	0	0	0	0	0	0	0
164	Apolipoprotein F OS=Homo sapiens GN=APOF PE=1 SV=2	APOF_HUMAN	35	5.36	Homo sapiens	0	0	0	0	0	0	0	0	0	0	0	0	0.000787237	0	0.000701569
165	Ubiquitin-60S ribosomal protein L40 OS=Homo sapiens GN=UBA52 PE=1 SV=2	RL40_HUMAN (+3)	15	10.51	Homo sapiens	0.00741433	0	0	0	0	0	0	0	0	0	0	0	0	0	0
166	Hemoglobin subunit beta OS=Homo sapiens GN=HBB PE=1 SV=2	HBB_HUMAN	16	7.32	Homo sapiens	0	0	0	0	0	0	0	0	0	0	0.00264179	0	0	0	0
167	Ig heavy chain V-III region BUT OS=Homo sapiens PE=1 SV=1	HV306_HUMAN	12	9.48	Homo sapiens	0	0	0	0	0	0	0.00265892	0	0	0	0	0	0	0	0
168	Plasma protease C1 inhibitor OS=Homo sapiens GN=SERPING1 PE=1 SV=2	IC1_HUMAN	55	6.52	Homo sapiens	0	0	0	0	0	0	0	0	0.00107298	0	0	0	0	0	0.000299133
169	Hemoglobin subunit alpha OS=Homo sapiens GN=HBA1 PE=1 SV=2	HBA_HUMAN	15	9.09	Homo sapiens	0	0	0	0	0	0	0	0	0	0	0.000947292	0	0	0	0
170	Mannose-binding protein C OS=Homo sapiens GN=MBL2 PE=1 SV=2	MBL2_HUMAN	26	5.14	Homo sapiens	0	0	0	0	0	0	0	0	0	0	0.0016188	0	0	0	0.0015772
171	Desmoglein-1 OS=Homo sapiens GN=DSG1 PE=1 SV=2	DSG1_HUMAN	114	4.66	Homo sapiens	0	0	0	0	0	0	0	0.0015288	0	0	0	0	0	0	0
172	Erythrocyte band 7 integral membrane protein OS=Homo sapiens GN=STOM PE=1 SV=3	STOM_HUMAN	32	8.07	Homo sapiens	0	0	0	0	0	0	0.000556341	0	0.00128634	0.000641345	0	0	0	0	0
173	Collectin-11 OS=Homo sapiens GN=COLEC11 PE=1 SV=1	COL11_HUMAN	29	5.06	Homo sapiens	0	0	0	0	0	0	0	0	0	0	0.000470113	0	0.000493965	0	0.00113455
174	Coagulation factor XII OS=Homo sapiens GN=F12 PE=1 SV=3	FA12_HUMAN	68	7.76	Homo sapiens	0	0	0	0	0	0	0.000234611	0	0.000862971	0	0	0	0	0	0
175	Pigment epithelium-derived factor OS=Homo sapiens GN=SERPINF1 PE=1 SV=4	PEDF_HUMAN	46	6.33	Homo sapiens	0	0	0	0	0	0	0	0	0.000361122	0	0.00123014	0	0	0	0.000355869
176	Keratin, type II cytoskeletal 6C OS=Homo sapiens GN=KRT6C PE=1 SV=3	K2C6C_HUMAN	60	8.16	Homo sapiens	0	0.00601796	0	0	0	0	0.00796646	0	0	0	0	0	0	0	0
177	Adenosylhomocysteinase OS=Homo sapiens GN=AHCY PE=1 SV=4	SAHH_HUMAN	48	6.29	Homo sapiens	0.000789767	0	0	0	0	0	0	0	0	0	0	0	0	0	0
178	Zinc-alpha-2-glycoprotein OS=Homo sapiens GN=AZGP1 PE=1 SV=2	ZA2G_HUMAN	34	5.92	Homo sapiens	0	0	0	0	0	0	0	0	0.00298383	0	0	0	0	0	0
179	ATP synthase subunit alpha, mitochondrial OS=Homo sapiens GN=ATP5A1 PE=1 SV=1	ATPA_HUMAN	60	9.56	Homo sapiens	0	0	0	0	0	0.000554798	0	0	0	0	0	0	0	0	0
180	Complement factor I OS=Homo sapiens GN=CFI PE=1 SV=2	CFAI_HUMAN	66	7.53	Homo sapiens	0	0	0	0	0	0	0	0	0	0	0.0010683	0	0	0	0
181	Afamin OS=Homo sapiens GN=AFM PE=1 SV=1	AFAM_HUMAN	69	5.7	Homo sapiens	0	0	0	0	0	0	0	0	0.000731859	0	0.000505447	0	0	0	0
182	Junction plakoglobin OS=Homo sapiens GN=JUP PE=1 SV=3	PLAK_HUMAN	82	6.05	Homo sapiens	0	0.00154299	0	0	0	0	0	0.000470898	0	0	0	0	0	0	0
183	Plasma kallikrein OS=Homo sapiens GN=KLKB1 PE=1 SV=1	KLKB1_HUMAN	71	8.26	Homo sapiens	0	0	0	0	0	0	0	0	0.000233967	0	0	0	0	0	0.000231687
184	Collectin-10 OS=Homo sapiens GN=COLEC10 PE=2 SV=2	COL10_HUMAN	31	7.39	Homo sapiens	0	0	0	0	0	0	0	0	0	0	0	0	0.000462096	0	0
185	Suprabasin OS=Homo sapiens GN=SBSN PE=1 SV=2	SBSN_HUMAN	61	7.01	Homo sapiens	0	0	0	0	0	0	0.000291851	0	0	0	0	0	0	0	0
186	Serum amyloid A-4 protein OS=Homo sapiens GN=SAA4 PE=1 SV=2	SAA4_HUMAN	15	9.38	Homo sapiens	0	0	0	0	0	0	0	0	0	0	0	0	0.000954999	0	0
187	Aggrecan core protein OS=Homo sapiens GN=ACAN PE=1 SV=2	PGCA_HUMAN	250	3.82	Homo sapiens	0	0	0	0	0	0	0	0	0	0	0	0	8.08994e-05	0	0
188	Ig kappa chain V-I region Lay OS=Homo sapiens PE=1 SV=1	KV113_HUMAN	12	4.53	Homo sapiens	0	0	0	0	0	0	0	0	0	0.00440742	0	0	0	0	0
189	Endoplasmin OS=Homo sapiens GN=HSP90B1 PE=1 SV=1	ENPL_HUMAN	92	4.48	Homo sapiens	0	0	0	0	0	0	0	0	0	0	0	0	0.000299492	0	0
190	Coagulation factor VII OS=Homo sapiens GN=F7 PE=1 SV=1	FA7_HUMAN	52	7.23	Homo sapiens	0	0	0	0	0	0	0	0	0	0	0.000273257	0	0	0	0
191	Carboxypeptidase N catalytic chain OS=Homo sapiens GN=CPN1 PE=1 SV=1	CBPN_HUMAN	52	7.36	Homo sapiens	0	0	0	0	0	0	0	0	0	0	0.000550679	0	0	0	0
192	Glutathione peroxidase 3 OS=Homo sapiens GN=GPX3 PE=1 SV=2	GPX3_HUMAN	26	8.29	Homo sapiens	0	0	0	0	0	0	0	0	0	0	0.000524357	0	0	0	0
193	Glyceraldehyde-3-phosphate dehydrogenase OS=Homo sapiens GN=GAPDH PE=1 SV=3	G3P_HUMAN	36	8.73	Homo sapiens	0.0026152	0	0	0	0	0	0	0	0	0	0	0	0	0	0
194	Myosin-9 OS=Homo sapiens GN=MYH9 PE=1 SV=4	MYH9_HUMAN	227	5.29	Homo sapiens	0	0	0	0	0	0	0	0	0	0	0	0	0	0.000114811	0
195	Tetranectin OS=Homo sapiens GN=CLEC3B PE=1 SV=3	TETN_HUMAN	23	5.36	Homo sapiens	0	0	0	0	0	0	0	0	0	0	0.000926699	0	0	0	0
196	GTP-binding nuclear protein Ran OS=Homo sapiens GN=RAN PE=1 SV=3	RAN_HUMAN	24	7.59	Homo sapiens	0.0015535	0	0	0	0	0	0	0	0	0	0	0	0	0	0
197	40S ribosomal protein S13 OS=Homo sapiens GN=RPS13 PE=1 SV=2	RS13_HUMAN	17	11.19	Homo sapiens	0.00431212	0	0	0	0	0	0	0	0	0	0	0	0	0	0
198	Cartilage acidic protein 1 OS=Homo sapiens GN=CRTAC1 PE=1 SV=2	CRAC1_HUMAN	71	4.73	Homo sapiens	0	0	0	0	0	0	0	0	0	0	0	0	0.00020176	0	0
199	Sodium-dependent phosphate transporter 2 OS=Homo sapiens GN=SLC20A2 PE=1 SV=1	S20A2_HUMAN	70	6.09	Homo sapiens	0	0	0	0	0.000786301	0	0	0	0	0	0	0	0	0	0
200	Platelet glycoprotein Ib alpha chain OS=Homo sapiens GN=GP1BA PE=1 SV=2	GP1BA_HUMAN	72	6.24	Homo sapiens	0	0	0	0	0	0	0	0	0	0	0	0	0.000195417	0	0

## Sheet: TOP25
						CHOL					DOPG					DOTAP
						17.9913	15.8211	14.5376	11.4512	11.2674	20.6391	40.3784	17.2142	39.6391	31.8876	47.3435	0	47.7883	25.6368	40.5912
#	Identified Proteins (200)	Accession Number	Molecular Weight	pI	Taxonomy	CHOL_A	CHOL_B	CHOL_C	CHOL_D	CHOL_E	DOPG_A	DOPG_B	DOPG_C	DOPG_D	DOPG_E	DOTAP_A	DOTAP_B	DOTAP_C	DOTAP_D	DOTAP_E
7	Vitronectin OS=Homo sapiens GN=VTN PE=1 SV=1	VTNC_HUMAN	54	5.54	Homo sapiens	0.0297714	0.00658982	0	0.00160083	0.0060042	0	0.00136213	0	0.00249169	0.00174269	0.0554887	0	0.0449092	0.062365	0.0878951
14	Ig lambda-3 chain C regions OS=Homo sapiens GN=IGLC3 PE=1 SV=1	LAC3_HUMAN	11	7.34	Homo sapiens	0.0859388	0.0941336	0.108645	0.121736	0.135122	0.114662	0.0647453	0.1232	0.0611154	0.0874846	0.0352194	0	0.0564173	0.0685595	0.0634463				0.0289441	0.0193192	0.0058744	0	0.0148847	0.0449086	0.0302322	0	0.0248235	0.0332112	0.00671443	0	0.0154036	0.00451177	0.0224919				0	0	0	0	0	0	0	0
9	Ig kappa chain C region OS=Homo sapiens GN=IGKC PE=1 SV=1	IGKC_HUMAN	12	5.68	Homo sapiens	0.0943107	0.0911032	0.147199	0.126411	0.0930728	0.219805	0.198126	0.180652	0.137804	0.202796	0.0288041	0	0.064506	0.0574162	0.0547557				0.150067	0.181366	0.137871	0.143797	0.162269	0.167547	0.15332	0.13908	0.133778	0.176165	0.0681538	0	0.0860758	0.0978857	0.0950213				0.0102963	0.0111185	0.00600493	0.00979829	0.0150568	0.003646	0.00688537	0.00155666
2	Ig gamma-1 chain C region OS=Homo sapiens GN=IGHG1 PE=1 SV=1	IGHG1_HUMAN	36	8.31	Homo sapiens	0.0792865	0.1113	0.0815666	0.0857766	0.11293	0.0847341	0.0929875	0.0860958	0.0814625	0.1159	0.0281711	0	0.0383905	0.0502016	0.0396878				0.350935	0.419779	0.299065	0.316876	0.456757	0.428544	0.360952	0.375322	0.308183	0.434995	0.19487	0	0.252288	0.26616	0.273426				0.0102963	0.0111185	0.00600493	0.00979829	0.0150568	0.003646	0.00688537	0.00155666
50	Apolipoprotein C-III OS=Homo sapiens GN=APOC3 PE=1 SV=1	APOC3_HUMAN	11	5.04	Homo sapiens	0.0134709	0.00754527	0.00826204	0	0	0	0	0	0	0	0.0307605	0	0.0164809	0.0141896	0.0350789				0.427115	0.510838	0.422546	0.44918	0.629488	0.482934	0.430065	0.476769	0.429941	0.513327	0.277504	0	0.35446	0.357456	0.37154				0.0102963	0.0111185	0.00600493	0.00979829	0.0150568	0.003646	0.00688537	0.00155666
16	Ig gamma-3 chain C region OS=Homo sapiens GN=IGHG3 PE=1 SV=2	IGHG3_HUMAN	41	7.95	Homo sapiens	0.0564632	0.0628275	0.0402443	0.0461126	0.0766582	0.055496	0.0405713	0.0519726	0.0373372	0.063811	0.0185306	0	0.021268	0.0237816	0.0312407				0.603745	0.639651	0.619699	0.629963	0.770592	0.725598	0.652964	0.704298	0.61376	0.739829	0.482842	0	0.55581	0.562758	0.623343				0.0142548	0.0111185	0.00600493	0.00979829	0.0150568	0.003646	0.00688537	0.00155666
20	Apolipoprotein D OS=Homo sapiens GN=APOD PE=1 SV=1	APOD_HUMAN	21	4.79	Homo sapiens	0.0238169	0.0462239	0.0262298	0.0346972	0.0367484	0.0253576	0.0193908	0.0165984	0.0204514	0.0164033	0.0298587	0	0.0388991	0.0588208	0.0305018				0.630342	0.685875	0.645929	0.664661	0.80734	0.750955	0.672355	0.720896	0.634212	0.756233	0.533793	0	0.621528	0.648559	0.669654				0.0939957	0.0936961	0.091009	0.157213	0.151935	0.0457032	0.0724817	0.0828212
27	Ig gamma-2 chain C region OS=Homo sapiens GN=IGHG2 PE=1 SV=2	IGHG2_HUMAN	36	7.66	Homo sapiens	0.0432622	0.0679008	0	0	0.0229338	0.0797481	0.0703619	0.0532569	0.0439359	0.0851994	0.0189484	0	0.0238392	0	0.0287396																						0.136787	0.111486	0.091009	0.177065	0.173916	0.0733829	0.0892338	0.0900343
6	C4b-binding protein alpha chain OS=Homo sapiens GN=C4BPA PE=1 SV=2	C4BPA_HUMAN	67	7.31	Homo sapiens	0.0152034	0.0135507	0.0123042	0.0052301	0.0597752	0.0110909	0.0231142	0.007812	0.00464438	0.0223343	0.0308924	0	0.0388493	0.0516206	0.0276991																						0.231159	0.219965	0.223024	0.251113	0.335662	0.17069	0.167796	0.218318
5	Ig mu chain C region OS=Homo sapiens GN=IGHM PE=1 SV=3	IGHM_HUMAN	49	6.77	Homo sapiens	0.0351288	0.0456517	0.0917703	0.0279351	0.0850879	0.0418111	0.0379909	0.0763112	0.0223504	0.0475926	0.0136452	0	0.0367245	0.0177773	0.0249725																						0.383861	0.42755	0.349719	0.381817	0.527512	0.346221	0.35986	0.400446
43	Immunoglobulin lambda-like polypeptide 5 OS=Homo sapiens GN=IGLL5 PE=2 SV=2	IGLL5_HUMAN	23	9.05	Homo sapiens	0.0289441	0.0193192	0.0058744	0	0.0148847	0.0449086	0.0302322	0	0.0248235	0.0332112	0.00671443	0	0.0154036	0.00451177	0.0224919																						0.436622	0.493093	0.381823	0.416514	0.579146	0.416488	0.409483	0.417044
13	Fibrinogen beta chain OS=Homo sapiens GN=FGB PE=1 SV=2	FIBB_HUMAN	56	8.38	Homo sapiens	0.0069622	0.00711304	0	0.0104063	0.00743771	0.0158708	0.00809128	0.00311096	0.015929	0.00708829	0.0238978	0	0.0265711	0.0222883	0.0221426				CHOL					DOPG					DOTAP								0.630342	0.685875	0.645929	0.664661	0.80734	0.750955	0.672355	0.720896
4	Serum albumin OS=Homo sapiens GN=ALB PE=1 SV=2	ALBU_HUMAN	69	6.21	Homo sapiens	0.0287607	0.0253924	0.0222698	0.0945698	0.0500871	0.00893319	0.0204736	0.023579	0.0917398	0.0152987	0.026334	0	0.0228375	0.0309039	0.0221355				CHOL_A	CHOL_B	CHOL_C	CHOL_D	CHOL_E	DOPG_A	DOPG_B	DOPG_C	DOPG_D	DOPG_E	DOTAP_A	DOTAP_B	DOTAP_C	DOTAP_D	DOTAP_E
17	Prothrombin OS=Homo sapiens GN=F2 PE=1 SV=2	THRB_HUMAN	70	5.7	Homo sapiens	0.00395848	0	0	0	0	0	0	0	0.00144929	0	0.0350916	0	0.0220219	0.0159741	0.0218209			>9	0.0289441	0.0193192	0	0	0.0148847	0.0449086	0.0302322	0.00670319	0.0248235	0.0332112	0	0	0.0154036	0	0.0224919
3	Complement C3 OS=Homo sapiens GN=C3 PE=1 SV=2	CO3_HUMAN	187	6.34	Homo sapiens	0.0102963	0.0111185	0.00600493	0.00979829	0.0150568	0.003646	0.00688537	0.00155666	0.00766789	0.00688109	0.0227626	0	0.0175972	0.0194019	0.0217392			08_09	0.169616	0.211244	0.224707	0.172488	0.172895	0.178428	0.184316	0.207152	0.119314	0.204138	0.0520689	0	0.0649616	0.093374	0.0725294
96	Ig gamma-4 chain C region OS=Homo sapiens GN=IGHG4 PE=1 SV=1	IGHG4_HUMAN	36	7.41	Homo sapiens	0	0	0	0	0	0	0.00883935	0	0.0273726	0	0.01215	0	0.0137417	0.0198658	0.0171082			07_08	0.214025	0.251726	0.174154	0.229369	0.317444	0.260997	0.207632	0.254982	0.206941	0.258829	0.122689	0	0.191201	0.176493	0.178405
24	Hyaluronan-binding protein 2 OS=Homo sapiens GN=HABP2 PE=1 SV=1	HABP2_HUMAN	63	6.52	Homo sapiens	0.00090259	0	0	0	0	0	0	0	0	0	0.0175575	0	0.0150856	0.0208461	0.0170736			06_07	0.0886508	0.0951985	0.139136	0.206704	0.18509	0.0418111	0.0584645	0.112208	0.170608	0.0714514	0.144342	0	0.10874	0.104533	0.0981136
30	Serum paraoxonase/arylesterase 1 OS=Homo sapiens GN=PON1 PE=1 SV=3	PON1_HUMAN	40	4.89	Homo sapiens	0.00278037	0	0	0	0	0	0	0	0	0	0.021092	0	0.0268187	0.0269798	0.0158087			05_06	0.151197	0.107178	0.207499	0.195544	0.135099	0.242663	0.208977	0.223427	0.192922	0.217919	0.212704	0	0.191631	0.21458	0.251803				CHOL					DOPG
40	Apolipoprotein E OS=Homo sapiens GN=APOE PE=1 SV=1	APOE_HUMAN	36	5.42	Homo sapiens	0.00463395	0	0	0	0	0	0	0	0.00163345	0	0.0146766	0	0.013764	0.0184247	0.0157396			<5	0.106452	0.190486	0.137596	0.0841001	0.0884177	0.106747	0.0966852	0.156452	0.043105	0.085284	0.0694555	0	0.0657178	0.111822	0.0463106				CHOL_A	CHOL_B	CHOL_C	CHOL_D	CHOL_E	DOPG_A	DOPG_B	DOPG_C
28	Apolipoprotein A-I OS=Homo sapiens GN=APOA1 PE=1 SV=1	APOA1_HUMAN	31	5.5	Homo sapiens	0.0107831	0.00341319	0.0103306	0.0319222	0	0	0.00526148	0.00811884	0.0181456	0	0.0222779	0	0.0182657	0.0155207	0.0145714			tot	0.758886	0.875152	0.883092	0.888205	0.913831	0.875556	0.786307	0.960924	0.757712	0.870832	0.601259	0	0.637656	0.700802	0.669654			>300	0	0	0	0	0	0	0	0
49	Ficolin-3 OS=Homo sapiens GN=FCN3 PE=1 SV=2	FCN3_HUMAN	33	6.66	Homo sapiens	0.00109158	0.00889602	0.00343639	0	0.022499	0	0.00376332	0	0	0.00856018	0.00233443	0	0.00992637	0.00236684	0.0121927																					150-300	0	0.0111185	0	0.00979829	0.0150568	0	0	0
22	Fibrinogen gamma chain OS=Homo sapiens GN=FGG PE=1 SV=3	FIBG_HUMAN	52	5.32	Homo sapiens	0.00605774	0.00408716	0	0.00784512	0.00853908	0.0118089	0.00729875	0.00410218	0.0134564	0.00684092	0.0128594	0	0.0116832	0.0152518	0.0120016																					100-150	0.0127904	0	0	0	0.0123594	0	0	0
8	Keratin, type II cytoskeletal 1 OS=Homo sapiens GN=KRT1 PE=1 SV=6	K2C1_HUMAN	66	8.33	Homo sapiens	0.0348742	0.0436345	0.05043	0.0476146	0.0270158	0.0220331	0.0220085	0.0498735	0.0115628	0.0199654	0.00937046	0	0.00571067	0.0208841	0.010699																					80-100	0	0	0	0	0	0	0	0
119	Complement C4-B OS=Homo sapiens GN=C4B PE=1 SV=2	CO4B_HUMAN	193	7.28	Homo sapiens	0	0	0	0	0	0	0	0	0	0	0.0109758	0	0.0120971	0.00444701	0.0101711																					70-80	0	0	0	0.026507	0.0111352	0	0	0
25	CD5 antigen-like OS=Homo sapiens GN=CD5L PE=1 SV=1	CD5L_HUMAN	38	5.15	Homo sapiens	0.0136442	0.0160753	0.0313621	0.013005	0.0334874	0.0110493	0.0108506	0.0346561	0.00883807	0.0151224	0.00537942	0	0.00971999	0.00615963	0.00994013																					60-70	0.153591	0.166679	0.166781	0.195018	0.173588	0.0544916	0.09846	0.183407
10	Complement C4-A OS=Homo sapiens GN=C4A PE=1 SV=2	CO4A_HUMAN	193	7.08	Homo sapiens	0.00401904	0.00305504	0.0024977	0.00286388	0.00555042	0.00340762	0.00331873	0.001405	0.00228242	0.00211076	0.0104294	0	0.0118795	0.012665	0.00983101																					50-60	0.0800172	0.0816041	0.0648751	0.0325752	0.0295369	0.0604025	0.0379765	0.0672708
19	Haptoglobin OS=Homo sapiens GN=HP PE=1 SV=1	HPT_HUMAN	45	6.56	Homo sapiens	0.0119709	0.0130359	0.00658849	0.0271046	0.00388548	0.00073413	0.00658026	0.00431279	0.0269359	0.00464772	0.0285895	0	0.0164956	0.0156041	0.00949148																					40-50	0.103563	0.137279	0.132015	0.125359	0.161746	0.0973071	0.0785622	0.145215
21	Inter-alpha-trypsin inhibitor heavy chain H2 OS=Homo sapiens GN=ITIH2 PE=1 SV=2	ITIH2_HUMAN	106	6.85	Homo sapiens	0.00035763	0	0	0	0	0	0	0	0.00165768	0	0.0199782	0	0.00764006	0.00760452	0.00898774																					30-40	0.136193	0.195276	0.123259	0.130704	0.19185	0.175531	0.183039	0.194856
99	Ig kappa chain V-IV region (Fragment) OS=Homo sapiens GN=IGKV4-1 PE=4 SV=1	KV401_HUMAN (+1)	13	4.85	Homo sapiens	0.005687	0	0	0	0	0.012377	0.00702916	0	0.00646563	0.00556471	0	0	0.00480954	0	0.00883954																					20-30	0.052761	0.076872	0.0429734	0.0346972	0.0642239	0.0814622	0.0610839	0.0389543
31	Plasminogen OS=Homo sapiens GN=PLG PE=1 SV=2	PLMN_HUMAN	91	7.25	Homo sapiens	0.00224293	0.000890512	0	0	0	0.00245445	0.00290405	0.000429666	0.00479318	0.00137883	0.00689363	0	0.00499695	0.00442963	0.00866411																					<20	0.219971	0.206324	0.353189	0.333548	0.254334	0.406361	0.327185	0.331221
55	Protein AMBP OS=Homo sapiens GN=AMBP PE=1 SV=1	AMBP_HUMAN	39	6.15	Homo sapiens	0	0	0	0	0	0	0	0	0.00194224	0	0.0106753	0	0.00840251	0.00666857	0.00863494																					tot	0.758886	0.875152	0.883092	0.888205	0.913831	0.875556	0.786307	0.960924
84	C-reactive protein OS=Homo sapiens GN=CRP PE=1 SV=1	CRP_HUMAN	25	5.32	Homo sapiens	0	0	0	0	0	0	0	0	0	0	0.00646293	0	0.0042164	0.00312052	0.00854331
78	Haptoglobin-related protein OS=Homo sapiens GN=HPR PE=2 SV=2	HPTR_HUMAN	39	7.11	Homo sapiens	0.00340207	0	0.0064473	0	0.00149997	0.00372876	0.00527435	0	0.0163898	0.00455843	0.019098	0	0.0131092	0.00434369	0.00842392
110	Complement component C8 gamma chain OS=Homo sapiens GN=C8G PE=1 SV=3	CO8G_HUMAN	22	8.48	Homo sapiens	0	0	0	0	0	0	0	0	0	0	0.00353767	0	0.00380712	0.00531907	0.00821446
70	Apolipoprotein M OS=Homo sapiens GN=APOM PE=1 SV=2	APOM_HUMAN	21	5.92	Homo sapiens	0	0	0	0	0	0	0	0	0	0	0.0107406	0	0.010621	0.00557833	0.0074266
18	Keratin, type I cytoskeletal 10 OS=Homo sapiens GN=KRT10 PE=1 SV=6	K1C10_HUMAN	59	4.88	Homo sapiens	0.0207137	0.0243516	0.0322767	0.0221689	0.00917804	0.00985004	0.0113635	0.0206806	0.00800006	0.0113319	0.00644775	0	0.00343971	0.0134399	0.00723719
11	Complement factor H OS=Homo sapiens GN=CFH PE=1 SV=4	CFAH_HUMAN	139	6.59	Homo sapiens	0.0127904	0.0068556	0.00461976	0.0071266	0.0123594	0.00499039	0.00486773	0.00403655	0.00611892	0.00489744	0.0108907	0	0.00682919	0.00841711	0.00685425
56	Immunoglobulin J chain OS=Homo sapiens GN=IGJ PE=1 SV=4	IGJ_HUMAN	18	4.87	Homo sapiens	0.0102859	0.0105438	0.016563	0.00497044	0.0166577	0.00894597	0.0100995	0.0150512	0.00557893	0.00985362	0.00233827	0	0.00661934	0.00216735	0.00684112
53	Coagulation factor IX OS=Homo sapiens GN=F9 PE=1 SV=2	FA9_HUMAN	52	5.16	Homo sapiens	0	0	0	0	0	0	0	0	0	0	0.00784561	0	0.00659184	0.00700173	0.0067902
90	Transthyretin OS=Homo sapiens GN=TTR PE=1 SV=1	TTHY_HUMAN	16	5.58	Homo sapiens	0	0	0	0	0	0	0	0	0.00211791	0	0.00925302	0	0.00870525	0.0154382	0.00667828
26	Inter-alpha-trypsin inhibitor heavy chain H1 OS=Homo sapiens GN=ITIH1 PE=1 SV=3	ITIH1_HUMAN	101	6.78	Homo sapiens	0	0	0	0	0	0	0	0	0.000836702	0	0.0154749	0	0.0073938	0.00566344	0.0064238
66	Ig heavy chain V-III region 23 OS=Homo sapiens GN=IGHV3-23 PE=1 SV=2	HV303_HUMAN	13	8.46	Homo sapiens	0.00578405	0.00467519	0.0264936	0	0.00948181	0.0124666	0.0153534	0	0.0103595	0.00971547	0	0	0.00862704	0	0.00632712
109	Secreted phosphoprotein 24 OS=Homo sapiens GN=SPP2 PE=1 SV=1	SPP24_HUMAN	24	8.46	Homo sapiens	0	0	0	0	0	0	0	0	0	0	0.00352238	0	0.00465545	0.0075834	0.00615734
33	Vitamin K-dependent protein S OS=Homo sapiens GN=PROS1 PE=1 SV=1	PROS_HUMAN	75	5.37	Homo sapiens	0	0	0	0	0	0	0	0	0	0	0.012745	0	0.0102525	0.00727919	0.00613195
44	Ig alpha-1 chain C region OS=Homo sapiens GN=IGHA1 PE=1 SV=2	IGHA1_HUMAN	38	6.49	Homo sapiens	0.00633561	0.00772549	0.00422442	0.00916845	0.0029879	0.00467225	0.00546238	0.00357206	0.00953282	0.00412743	0.00628678	0	0.00458565	0.00718455	0.0060524
98	Apolipoprotein C-II OS=Homo sapiens GN=APOC2 PE=1 SV=1	APOC2_HUMAN	11	4.36	Homo sapiens	0.00344625	0	0	0	0	0	0	0	0	0	0.0185049	0	0.00445825	0	0.00597482
23	Serotransferrin OS=Homo sapiens GN=TF PE=1 SV=3	TRFE_HUMAN	77	7.13	Homo sapiens	0.00264254	0.00272788	0.00178753	0.026507	0.0111352	0	0.00432003	0.00100116	0.0207898	0.00203691	0.00384634	0	0.00380712	0.00422108	0.00575962
15	Alpha-2-macroglobulin OS=Homo sapiens GN=A2M PE=1 SV=3	A2MG_HUMAN	163	6.43	Homo sapiens	0.00409572	0.00569421	0.00548215	0.00822646	0.00643296	0	0.00141973	0	0.00851943	0.000641781	0.00518456	0	0.0055318	0.00566265	0.00564293
60	Complement component C9 OS=Homo sapiens GN=C9 PE=1 SV=2	CO9_HUMAN	63	5.27	Homo sapiens	0	0	0	0	0	0	0	0	0	0	0.00570005	0	0.00343068	0.00742972	0.00560528
12	Keratin, type I cytoskeletal 9 OS=Homo sapiens GN=KRT9 PE=1 SV=3	K1C9_HUMAN	62	4.89	Homo sapiens	0.0323896	0.0363505	0.0299282	0.027234	0.017727	0.0111881	0.0155906	0.0406004	0.00774298	0.0143119	0.00451925	0	0.0021351	0.0125814	0.00556303
61	C4b-binding protein beta chain OS=Homo sapiens GN=C4BPB PE=1 SV=1	C4BPB_HUMAN	28	4.8	Homo sapiens	0	0	0	0	0.00196575	0	0.00149047	0	0	0.0022406	0.0113181	0	0.0102183	0.0125378	0.00528066
106	Apolipoprotein A-II OS=Homo sapiens GN=APOA2 PE=1 SV=1	APOA2_HUMAN	11	6.6	Homo sapiens	0	0	0	0.0104599	0	0	0	0	0.0115292	0	0.00449832	0	0.00445825	0	0.00522336
37	Cartilage oligomeric matrix protein OS=Homo sapiens GN=COMP PE=1 SV=2	COMP_HUMAN	83	4.16	Homo sapiens	0	0	0	0	0	0	0	0	0	0	0.0105241	0	0.00847904	0.00642306	0.0049473
29	Keratin, type II cytoskeletal 2 epidermal OS=Homo sapiens GN=KRT2 PE=1 SV=2	K22E_HUMAN	65	8.17	Homo sapiens	0.0165461	0.0158538	0.0247309	0.0143084	0.0108762	0.0101795	0.00930661	0.0172934	0.00427293	0.00835818	0.00402155	0	0.00246497	0.00940053	0.00480064
46	Inter-alpha-trypsin inhibitor heavy chain H3 OS=Homo sapiens GN=ITIH3 PE=1 SV=2	ITIH3_HUMAN	100	5.49	Homo sapiens	0	0	0	0	0	0	0	0	0	0	0.00479272	0	0.00363039	0.00572127	0.00476308
58	Apolipoprotein A-IV OS=Homo sapiens GN=APOA4 PE=1 SV=3	APOA4_HUMAN	45	5.05	Homo sapiens	0	0	0	0	0	0	0	0	0.00485517	0	0.00549314	0	0.0091678	0.00780058	0.00456254
131	Ig lambda chain V-III region SH OS=Homo sapiens PE=1 SV=1	LV301_HUMAN	11	6.5	Homo sapiens	0	0	0	0	0	0	0.00677281	0	0.00375319	0	0	0	0	0	0.00448676
45	Complement C1q subcomponent subunit C OS=Homo sapiens GN=C1QC PE=1 SV=3	C1QC_HUMAN	26	8.58	Homo sapiens	0.0113622	0.0113288	0.0167436	0	0.0125908	0.011196	0.0114609	0.0156528	0.00453615	0.0108742	0.00403797	0	0.0050963	0.00550314	0.00442135
85	Vitamin K-dependent protein Z OS=Homo sapiens GN=PROZ PE=1 SV=2	PROZ_HUMAN	45	5.87	Homo sapiens	0	0	0	0	0	0	0	0	0	0	0.00375961	0	0.00386297	0	0.00437976
36	Alpha-1-antitrypsin OS=Homo sapiens GN=SERPINA1 PE=1 SV=3	A1AT_HUMAN	47	5.31	Homo sapiens	0	0.0017882	0	0.0242063	0	0	0.00247307	0	0.0146771	0	0.0106324	0	0.00607502	0.00442435	0.00436757
81	Complement component C8 alpha chain OS=Homo sapiens GN=C8A PE=1 SV=2	CO8A_HUMAN	65	6.41	Homo sapiens	0	0	0	0	0	0	0.000368158	0	0.000911658	0	0.00227767	0	0.00171442	0.00440118	0.00404325
35	Ceruloplasmin OS=Homo sapiens GN=CP PE=1 SV=1	CERU_HUMAN	122	5.5	Homo sapiens	0	0	0	0.000708562	0	0	0	0	0.00371412	0	0.00624285	0	0.00418029	0.00415736	0.00397192
69	Ig alpha-2 chain C region OS=Homo sapiens GN=IGHA2 PE=1 SV=3	IGHA2_HUMAN	37	6.02	Homo sapiens	0.00950421	0.00615552	0.00676024	0	0	0.00386058	0.00558444	0	0.00287539	0	0.00283848	0	0.00659749	0.0119471	0.00354947
101	Protein Z-dependent protease inhibitor OS=Homo sapiens GN=SERPINA10 PE=1 SV=1	ZPI_HUMAN	51	8.58	Homo sapiens	0	0	0	0	0	0	0	0	0	0	0.00110953	0	0.00232549	0.0022945	0.0035419
74	Coagulation factor X OS=Homo sapiens GN=F10 PE=1 SV=2	FA10_HUMAN	55	5.74	Homo sapiens	0	0	0	0	0	0	0	0	0	0	0.00447997	0	0.00318125	0.00401931	0.00343313
72	Alpha-2-HS-glycoprotein OS=Homo sapiens GN=AHSG PE=1 SV=1	FETUA_HUMAN	39	5.52	Homo sapiens	0	0	0	0.00152937	0	0	0	0	0.0015078	0	0.00684504	0	0.00429848	0.00433327	0.00336622
68	Heparin cofactor 2 OS=Homo sapiens GN=SERPIND1 PE=1 SV=3	HEP2_HUMAN	57	6.89	Homo sapiens	0	0	0	0	0	0	0	0	0.00190962	0	0.00518772	0	0.00208808	0.00228169	0.00331556
48	Kininogen-1 OS=Homo sapiens GN=KNG1 PE=1 SV=2	KNG1_HUMAN	72	6.8	Homo sapiens	0	0	0	0.000800413	0	0	0	0	0.00139812	0	0.0093735	0	0.00397963	0.00306956	0.00330747
1	Apolipoprotein B-100 OS=Homo sapiens GN=APOB PE=1 SV=2	APOB_HUMAN	516	7.04	Homo sapiens	0.00423657	0.0076279	0.00173255	0.0041822	0.00407842	0.00701593	0.00443949	0.000825046	0.00450185	0.00397039	0.00747	0	0.00516407	0.00496444	0.00318284
52	Histidine-rich glycoprotein OS=Homo sapiens GN=HRG PE=1 SV=1	HRG_HUMAN	60	7.52	Homo sapiens	0	0	0	0	0	0.00483008	0.00178817	0	0.00363382	0	0.00681935	0	0.00454808	0.00346628	0.00314703
65	Alpha-1-antichymotrypsin OS=Homo sapiens GN=SERPINA3 PE=1 SV=2	AACT_HUMAN	48	5.19	Homo sapiens	0	0	0	0	0	0	0	0	0.00385266	0	0.00585388	0	0.0046573	0.00325235	0.00308033
47	Keratin, type II cytoskeletal 5 OS=Homo sapiens GN=KRT5 PE=1 SV=3	K2C5_HUMAN	62	7.91	Homo sapiens	0.0131578	0.0133133	0.0129605	0.0112907	0.0049703	0.00648898	0.00557708	0.0187401	0.00363931	0.00488999	0.000916735	0	0	0.00629085	0.00304684
92	Dermcidin OS=Homo sapiens GN=DCD PE=1 SV=2	DCD_HUMAN	11	6.52	Homo sapiens	0.00338945	0	0.0250958	0.0106432	0	0.00579489	0.00460315	0.0123178	0.00459075	0.00570335	0.0038426	0	0	0.00827131	0.0029911
116	Complement component C8 beta chain OS=Homo sapiens GN=C8B PE=1 SV=3	CO8B_HUMAN	67	8.17	Homo sapiens	0	0	0	0	0	0	0	0	0	0	0.000844571	0	0.000301863	0.000971663	0.00294163
118	Ig lambda chain V-I region HA OS=Homo sapiens PE=1 SV=1	LV102_HUMAN	12	5.6	Homo sapiens	0	0	0	0	0	0.00275299	0.00480189	0	0.00284422	0.00609738	0	0	0.00287915	0	0.00272833
57	Clusterin OS=Homo sapiens GN=CLU PE=1 SV=1	CLUS_HUMAN	52	6.21	Homo sapiens	0	0	0	0	0	0	0	0	0.00193989	0	0.00597504	0	0.00779912	0.00500258	0.00268521
114	Tropomyosin alpha-4 chain OS=Homo sapiens GN=TPM4 PE=1 SV=3	TPM4_HUMAN	29	4.36	Homo sapiens	0	0	0	0	0	0	0	0	0	0	0	0	0.00505867	0.00672413	0.00254855
95	Ig heavy chain V-III region GAL OS=Homo sapiens PE=1 SV=1	HV320_HUMAN	13	8.7	Homo sapiens	0.00578405	0.00829004	0.010585	0	0	0.011196	0.00511888	0.00295964	0.00452339	0.0104543	0	0	0.00534089	0	0.00252479
77	Complement C1q subcomponent subunit B OS=Homo sapiens GN=C1QB PE=1 SV=3	C1QB_HUMAN	27	8.87	Homo sapiens	0.00688062	0.00150068	0	0	0	0	0.00761851	0	0.00251916	0.00462284	0.00182864	0	0.00310681	0	0.00243118
71	Thrombospondin-1 OS=Homo sapiens GN=THBS1 PE=1 SV=2	TSP1_HUMAN	129	4.51	Homo sapiens	0	0	0	0	0	0	0	0	0	0	0.00136126	0	0.00178976	0.0019146	0.00235518
160	Serum amyloid A-2 protein OS=Homo sapiens GN=SAA2 PE=1 SV=1	SAA2_HUMAN	14	9.48	Homo sapiens	0	0	0	0	0	0	0	0	0	0	0.00651754	0	0.00196809	0	0.00234426
87	Thrombospondin-4 OS=Homo sapiens GN=THBS4 PE=1 SV=2	TSP4_HUMAN	106	4.23	Homo sapiens	0	0	0	0	0	0	0	0	0	0	0.00232554	0	0.00197022	0.00245291	0.00224695
39	Complement C5 OS=Homo sapiens GN=C5 PE=1 SV=4	CO5_HUMAN	188	6.49	Homo sapiens	0.00108733	0.000670575	0	0	0	0	0.000623071	0	0.000625575	0	0.00329576	0	0.00193085	0.00138309	0.00218376
112	Serum amyloid P-component OS=Homo sapiens GN=APCS PE=1 SV=2	SAMP_HUMAN	25	6.52	Homo sapiens	0.00144089	0	0	0	0	0	0.000712116	0	0	0	0.00169074	0	0.00196163	0.00519964	0.00196759
62	Complement C1s subcomponent OS=Homo sapiens GN=C1S PE=1 SV=1	C1S_HUMAN	77	4.59	Homo sapiens	0	0	0	0	0	0	0	0	0	0	0.0046632	0	0.00532766	0.00152016	0.00191969
73	Vitamin D-binding protein OS=Homo sapiens GN=GC PE=1 SV=1	VTDB_HUMAN	53	5.21	Homo sapiens	0	0	0	0.00661164	0	0	0	0	0.00604503	0	0.00479464	0	0.000254401	0.00147183	0.0018593
162	Apolipoprotein C-I OS=Homo sapiens GN=APOC1 PE=1 SV=1	APOC1_HUMAN	9	9.17	Homo sapiens	0	0	0	0	0	0	0	0	0	0	0	0	0.00159166	0	0.00182803
102	Phosphatidylcholine-sterol acyltransferase OS=Homo sapiens GN=LCAT PE=1 SV=1	LCAT_HUMAN	50	6.04	Homo sapiens	0	0	0	0	0	0	0	0	0	0	0.00184076	0	0.00280761	0.00363884	0.00180638
104	Actin, cytoplasmic 1 OS=Homo sapiens GN=ACTB PE=1 SV=1	ACTB_HUMAN (+1)	42	5.16	Homo sapiens	0.00485209	0	0	0	0.00139283	0	0.00215317	0	0	0	0.0011687	0	0	0.00185745	0.00175971
41	Fibrinogen alpha chain OS=Homo sapiens GN=FGA PE=1 SV=2	FIBA_HUMAN	95	5.87	Homo sapiens	0.00174938	0.000884689	0	0.00705477	0.00281533	0.00119526	0.0012973	0	0.00364561	0	0.00623398	0	0.0024201	0.00287388	0.00172868
152	Extracellular superoxide dismutase [Cu-Zn] OS=Homo sapiens GN=SOD3 PE=1 SV=2	SODE_HUMAN	26	6.59	Homo sapiens	0	0	0	0	0	0	0	0	0	0	0	0	0.00264935	0	0.00157879
97	Vitamin K-dependent protein C OS=Homo sapiens GN=PROC PE=1 SV=1	PROC_HUMAN	52	6.23	Homo sapiens	0	0	0	0	0	0	0	0	0	0	0.00257174	0	0.0024217	0.00250097	0.00157874
170	Mannose-binding protein C OS=Homo sapiens GN=MBL2 PE=1 SV=2	MBL2_HUMAN	26	5.14	Homo sapiens	0	0	0	0	0	0	0	0	0	0	0.0016188	0	0	0	0.0015772
79	Galectin-3-binding protein OS=Homo sapiens GN=LGALS3BP PE=1 SV=1	LG3BP_HUMAN	65	4.9	Homo sapiens	0.00144842	0.00132318	0.00246344	0	0.00810645	0	0.00139128	0.000591929	0	0.0020946	0.000221937	0	0.00107014	0	0.00139014
76	Alpha-1-acid glycoprotein 1 OS=Homo sapiens GN=ORM1 PE=1 SV=1	A1AG1_HUMAN	24	4.66	Homo sapiens	0	0	0	0.00727935	0	0	0	0	0.00878644	0	0.00968204	0	0.00377076	0.00162142	0.00137081
127	Lumican OS=Homo sapiens GN=LUM PE=1 SV=2	LUM_HUMAN	38	6.6	Homo sapiens	0	0	0	0	0	0	0	0	0	0	0.00314718	0	0.00237381	0.000685846	0.00129663
38	Fibronectin OS=Homo sapiens GN=FN1 PE=1 SV=4	FINC_HUMAN	263	5.45	Homo sapiens	0	0	0	0	0	0	0.000151487	0	0.00150402	0.000198232	0.00264772	0	0.00143183	0.00118696	0.0012803
120	Alpha-2-antiplasmin OS=Homo sapiens GN=SERPINF2 PE=1 SV=3	A2AP_HUMAN	55	6.24	Homo sapiens	0	0	0	0	0	0	0	0	0	0	0.0023108	0	0.000390681	0	0.00119644
173	Collectin-11 OS=Homo sapiens GN=COLEC11 PE=1 SV=1	COL11_HUMAN	29	5.06	Homo sapiens	0	0	0	0	0	0	0	0	0	0	0.000470113	0	0.000493965	0	0.00113455
59	Properdin OS=Homo sapiens GN=CFP PE=1 SV=2	PROP_HUMAN	51	7.92	Homo sapiens	0.00617652	0.00496177	0.0080865	0	0.0118198	0	0.00304091	0.00227821	0.00115063	0.00510552	0	0	0.000697206	0.000509966	0.00112903
34	Keratin, type I cytoskeletal 16 OS=Homo sapiens GN=KRT16 PE=1 SV=4	K1C16_HUMAN	51	4.69	Homo sapiens	0.015308	0.0330075	0.0175624	0.00733515	0.00648662	0.0110638	0.00919568	0.0223845	0.00396065	0.00799444	0.00248639	0	0.000810391	0.00535202	0.00112577
88	Complement C1r subcomponent OS=Homo sapiens GN=C1R PE=1 SV=2	C1R_HUMAN	80	6.14	Homo sapiens	0	0	0	0	0	0	0	0	0	0	0.00219999	0	0.00157936	0.00227618	0.00102669
164	Apolipoprotein F OS=Homo sapiens GN=APOF PE=1 SV=2	APOF_HUMAN	35	5.36	Homo sapiens	0	0	0	0	0	0	0	0	0	0	0	0	0.000787237	0	0.000701569
93	Keratin, type I cytoskeletal 17 OS=Homo sapiens GN=KRT17 PE=1 SV=2	K1C17_HUMAN	48	4.67	Homo sapiens	0.0111572	0.0157639	0.00663527	0	0	0	0.00533897	0.0169312	0	0.00149647	0	0	0	0	0.000685406
135	ATP synthase subunit beta, mitochondrial OS=Homo sapiens GN=ATP5B PE=1 SV=3	ATPB_HUMAN	57	5.07	Homo sapiens	0.000654104	0	0	0	0	0.00197168	0.000559024	0	0.00102951	0.00146369	0	0	0	0	0.000575829
83	Beta-2-glycoprotein 1 OS=Homo sapiens GN=APOH PE=1 SV=3	APOH_HUMAN	38	8.03	Homo sapiens	0	0	0	0	0	0	0.00175063	0.0127284	0.00553739	0.0016529	0	0	0.000354822	0	0.000432956
175	Pigment epithelium-derived factor OS=Homo sapiens GN=SERPINF1 PE=1 SV=4	PEDF_HUMAN	46	6.33	Homo sapiens	0	0	0	0	0	0	0	0	0.000361122	0	0.00123014	0	0	0	0.000355869
168	Plasma protease C1 inhibitor OS=Homo sapiens GN=SERPING1 PE=1 SV=2	IC1_HUMAN	55	6.52	Homo sapiens	0	0	0	0	0	0	0	0	0.00107298	0	0	0	0	0	0.000299133
136	Integrin beta-3 OS=Homo sapiens GN=ITGB3 PE=1 SV=2	ITB3_HUMAN	87	4.85	Homo sapiens	0	0	0	0	0	0	0	0	0.000964726	0	0	0	0	0.000447287	0.000283616
54	Apolipoprotein(a) OS=Homo sapiens GN=LPA PE=1 SV=1	APOA_HUMAN	501	5.77	Homo sapiens	0.00014632	0.00113737	0.000411992	0.00104633	0.000116764	0	0.000479802	0	0.000571856	0.000168518	2.72121e-05	0	0.000320901	0.000337082	0.00024603
183	Plasma kallikrein OS=Homo sapiens GN=KLKB1 PE=1 SV=1	KLKB1_HUMAN	71	8.26	Homo sapiens	0	0	0	0	0	0	0	0	0.000233967	0	0	0	0	0	0.000231687
161	Mannan-binding lectin serine protease 2 OS=Homo sapiens GN=MASP2 PE=1 SV=4	MASP2_HUMAN	76	5.37	Homo sapiens	0	0	0	0	0	0	0	0	0	0	0.000651073	0	0.00091525	0	0.000216478
157	Polymeric immunoglobulin receptor OS=Homo sapiens GN=PIGR PE=1 SV=4	PIGR_HUMAN	83	5.43	Homo sapiens	0	0	0	0	0.00172036	0	0	0	0	0.000884483	0	0	0	0	0.000197228
32	Hornerin OS=Homo sapiens GN=HRNR PE=1 SV=2	HORN_HUMAN	282	10.24	Homo sapiens	0.00393488	0.00217847	0.00251811	0.00289752	0	0.00086021	0.00291598	0.00267503	0.000595689	0.000963868	0	0	0	9.19953e-05	0.000116391
91	Filamin-A OS=Homo sapiens GN=FLNA PE=1 SV=4	FLNA_HUMAN	281	5.95	Homo sapiens	0	0	0	0	0.00219242	0	0.000119978	0	0.000478831	0	0	0	0	0.00018507	8.78237e-05
80	Coagulation factor V OS=Homo sapiens GN=F5 PE=1 SV=4	FA5_HUMAN	252	5.95	Homo sapiens	0	0	0	0	0	0.000253952	0.000228746	0	0.00020039	0.000248956	0.000534106	0	0.000639805	0.000412974	6.52869e-05
51	Keratin, type I cytoskeletal 14 OS=Homo sapiens GN=KRT14 PE=1 SV=4	K1C14_HUMAN	52	4.81	Homo sapiens	0.0142241	0.024245	0.0150361	0.00554132	0	0.0118089	0.00932605	0.0242057	0.00535693	0.00823865	0	0	0	0.00725003	0
42	Keratin, type II cytoskeletal 6A OS=Homo sapiens GN=KRT6A PE=1 SV=3	K2C6A_HUMAN	60	8.16	Homo sapiens	0.0126591	0.0185834	0.0141572	0.00575463	0.007807	0.00940847	0.00796646	0.0255081	0.000830582	0.00573993	0	0	0	0.00606717	0
105	Inter-alpha-trypsin inhibitor heavy chain H4 OS=Homo sapiens GN=ITIH4 PE=1 SV=4	ITIH4_HUMAN	103	6.97	Homo sapiens	0	0	0	0	0	0	0	0.000373547	0.00131073	0	0.00102419	0	0.000750566	0.000883344	0
128	Phosphatidylinositol-glycan-specific phospholipase D OS=Homo sapiens GN=GPLD1 PE=1 SV=3	PHLD_HUMAN	92	6.33	Homo sapiens	0	0	0	0	0	0	0	0	0	0	0.000686031	0	0.00150896	0.000847968	0
138	Heat shock 70 kDa protein 1-like OS=Homo sapiens GN=HSPA1L PE=1 SV=2	HS71L_HUMAN	70	5.82	Homo sapiens	0.00346182	0	0	0	0.00171151	0	0.000482235	0	0	0	0	0	0	0.000742926	0
111	Alpha-1B-glycoprotein OS=Homo sapiens GN=A1BG PE=1 SV=4	A1BG_HUMAN	54	5.71	Homo sapiens	0	0	0	0	0	0	0	0	0.00201346	0	0.00207778	0	0.00141061	0.00048042	0
149	Phospholipid transfer protein OS=Homo sapiens GN=PLTP PE=1 SV=1	PLTP_HUMAN	55	7.01	Homo sapiens	0	0	0	0	0	0	0	0	0	0	0	0	0.00190356	0.000472877	0
194	Myosin-9 OS=Homo sapiens GN=MYH9 PE=1 SV=4	MYH9_HUMAN	227	5.29	Homo sapiens	0	0	0	0	0	0	0	0	0	0	0	0	0	0.000114811	0
75	Ig kappa chain V-I region EU OS=Homo sapiens PE=1 SV=1	KV106_HUMAN	12	8.46	Homo sapiens	0.0123484	0.0105438	0.00757354	0	0	0.0107525	0.0171416	0	0.00773439	0.0217816	0	0	0.00925137	0	0
67	Ig heavy chain V-III region WAS OS=Homo sapiens PE=1 SV=1	HV315_HUMAN	13	8.84	Homo sapiens	0	0	0	0	0	0	0.00342364	0	0	0	0	0	0.00633588	0	0
142	Beta-Ala-His dipeptidase OS=Homo sapiens GN=CNDP1 PE=1 SV=4	CNDP1_HUMAN	57	4.95	Homo sapiens	0	0	0	0	0	0	0	0	0	0	0	0	0.00341707	0	0
107	Mannan-binding lectin serine protease 1 OS=Homo sapiens GN=MASP1 PE=1 SV=3	MASP1_HUMAN	79	5.18	Homo sapiens	0	0	0	0	0	0	0	0	0	0	0.000975141	0	0.00326596	0	0
124	Alpha-1-acid glycoprotein 2 OS=Homo sapiens GN=ORM2 PE=1 SV=2	A1AG2_HUMAN	24	4.76	Homo sapiens	0	0	0	0	0	0	0	0	0.00487635	0	0.00762482	0	0.00319673	0	0
153	Serum paraoxonase/lactonase 3 OS=Homo sapiens GN=PON3 PE=1 SV=3	PON3_HUMAN	40	5.1	Homo sapiens	0	0	0	0	0	0	0	0	0	0	0	0	0.00311983	0	0
103	Ig lambda chain V-III region LOI OS=Homo sapiens PE=1 SV=1	LV302_HUMAN	12	4.72	Homo sapiens	0.0107688	0	0	0	0	0.013516	0.00687136	0	0.0083684	0.004304	0.00417147	0	0.00285791	0	0
186	Serum amyloid A-4 protein OS=Homo sapiens GN=SAA4 PE=1 SV=2	SAA4_HUMAN	15	9.38	Homo sapiens	0	0	0	0	0	0	0	0	0	0	0	0	0.000954999	0	0
108	Ficolin-2 OS=Homo sapiens GN=FCN2 PE=1 SV=2	FCN2_HUMAN	34	6.77	Homo sapiens	0	0	0.00672124	0	0	0	0.00245301	0	0.000515265	0.0018452	0	0	0.000835148	0	0
145	Gelsolin OS=Homo sapiens GN=GSN PE=1 SV=1	GELS_HUMAN	86	6.19	Homo sapiens	0	0	0	0	0	0	0	0	0.000682349	0	0.00098299	0	0.000743634	0	0
89	Hemopexin OS=Homo sapiens GN=HPX PE=1 SV=2	HEMO_HUMAN	52	7.02	Homo sapiens	0	0	0	0.00559176	0	0	0.000765765	0	0.00680657	0	0.000535436	0	0.000672513	0	0
184	Collectin-10 OS=Homo sapiens GN=COLEC10 PE=2 SV=2	COL10_HUMAN	31	7.39	Homo sapiens	0	0	0	0	0	0	0	0	0	0	0	0	0.000462096	0	0
189	Endoplasmin OS=Homo sapiens GN=HSP90B1 PE=1 SV=1	ENPL_HUMAN	92	4.48	Homo sapiens	0	0	0	0	0	0	0	0	0	0	0	0	0.000299492	0	0
147	Calreticulin OS=Homo sapiens GN=CALR PE=1 SV=1	CALR_HUMAN	48	4.04	Homo sapiens	0	0	0	0	0	0	0	0	0	0	0.00131489	0	0.000293126	0	0
140	Angiotensinogen OS=Homo sapiens GN=AGT PE=1 SV=1	ANGT_HUMAN	53	6.27	Homo sapiens	0	0	0	0	0	0	0	0	0.000952797	0	0.00160048	0	0.000270283	0	0
198	Cartilage acidic protein 1 OS=Homo sapiens GN=CRTAC1 PE=1 SV=2	CRAC1_HUMAN	71	4.73	Homo sapiens	0	0	0	0	0	0	0	0	0	0	0	0	0.00020176	0	0
200	Platelet glycoprotein Ib alpha chain OS=Homo sapiens GN=GP1BA PE=1 SV=2	GP1BA_HUMAN	72	6.24	Homo sapiens	0	0	0	0	0	0	0	0	0	0	0	0	0.000195417	0	0
187	Aggrecan core protein OS=Homo sapiens GN=ACAN PE=1 SV=2	PGCA_HUMAN	250	3.82	Homo sapiens	0	0	0	0	0	0	0	0	0	0	0	0	8.08994e-05	0	0
63	Ig kappa chain V-III region HAH OS=Homo sapiens PE=2 SV=1	KV312_HUMAN	14	4.59	Homo sapiens	0.00807868	0.00289416	0.00655427	0	0	0.0115851	0.0217191	0	0.0138672	0.0171501	0.00803486	0	0	0	0
166	Hemoglobin subunit beta OS=Homo sapiens GN=HBB PE=1 SV=2	HBB_HUMAN	16	7.32	Homo sapiens	0	0	0	0	0	0	0	0	0	0	0.00264179	0	0	0	0
141	Complement component C6 OS=Homo sapiens GN=C6 PE=1 SV=3	CO6_HUMAN	105	6.74	Homo sapiens	0	0	0	0	0	0	0	0	0	0	0.00181048	0	0	0	0
129	Antithrombin-III OS=Homo sapiens GN=SERPINC1 PE=1 SV=1	ANT3_HUMAN	53	6.68	Homo sapiens	0	0	0	0	0	0	0	0	0.00316096	0	0.00133985	0	0	0	0
121	Ig lambda chain V-I region NIG-64 OS=Homo sapiens PE=1 SV=1	LV104_HUMAN	11	5.69	Homo sapiens	0	0	0.0103459	0	0.00531809	0	0	0	0.00148796	0	0.00129176	0	0	0	0
180	Complement factor I OS=Homo sapiens GN=CFI PE=1 SV=2	CFAI_HUMAN	66	7.53	Homo sapiens	0	0	0	0	0	0	0	0	0	0	0.0010683	0	0	0	0
169	Hemoglobin subunit alpha OS=Homo sapiens GN=HBA1 PE=1 SV=2	HBA_HUMAN	15	9.09	Homo sapiens	0	0	0	0	0	0	0	0	0	0	0.000947292	0	0	0	0
155	Retinol-binding protein 4 OS=Homo sapiens GN=RBP4 PE=1 SV=3	RET4_HUMAN	23	5.85	Homo sapiens	0	0	0	0	0	0	0	0	0.00365449	0	0.000926699	0	0	0	0
195	Tetranectin OS=Homo sapiens GN=CLEC3B PE=1 SV=3	TETN_HUMAN	23	5.36	Homo sapiens	0	0	0	0	0	0	0	0	0	0	0.000926699	0	0	0	0
130	Complement factor B OS=Homo sapiens GN=CFB PE=1 SV=2	CFAB_HUMAN	86	7.07	Homo sapiens	0	0	0	0.00171044	0	0	0	0	0.00195858	0	0.000732634	0	0	0	0
191	Carboxypeptidase N catalytic chain OS=Homo sapiens GN=CPN1 PE=1 SV=1	CBPN_HUMAN	52	7.36	Homo sapiens	0	0	0	0	0	0	0	0	0	0	0.000550679	0	0	0	0
192	Glutathione peroxidase 3 OS=Homo sapiens GN=GPX3 PE=1 SV=2	GPX3_HUMAN	26	8.29	Homo sapiens	0	0	0	0	0	0	0	0	0	0	0.000524357	0	0	0	0
181	Afamin OS=Homo sapiens GN=AFM PE=1 SV=1	AFAM_HUMAN	69	5.7	Homo sapiens	0	0	0	0	0	0	0	0	0.000731859	0	0.000505447	0	0	0	0
190	Coagulation factor VII OS=Homo sapiens GN=F7 PE=1 SV=1	FA7_HUMAN	52	7.23	Homo sapiens	0	0	0	0	0	0	0	0	0	0	0.000273257	0	0	0	0
86	Complement C1q subcomponent subunit A OS=Homo sapiens GN=C1QA PE=1 SV=2	C1QA_HUMAN	26	9.45	Homo sapiens	0.00289203	0.00486635	0.00445883	0.0067194	0.00685787	0.00310153	0.00382056	0.00670319	0.00194224	0.0044406	0	0	0	0	0
188	Ig kappa chain V-I region Lay OS=Homo sapiens PE=1 SV=1	KV113_HUMAN	12	4.53	Homo sapiens	0	0	0	0	0	0	0	0	0	0.00440742	0	0	0	0	0
150	Neutrophil defensin 1 OS=Homo sapiens GN=DEFA1 PE=1 SV=1	DEF1_HUMAN (+1)	10	7.04	Homo sapiens	0	0	0	0	0	0.00307079	0.00337564	0	0	0.00422138	0	0	0	0	0
113	Protein S100-A9 OS=Homo sapiens GN=S100A9 PE=1 SV=1	S10A9_HUMAN	13	6.07	Homo sapiens	0	0	0	0.0157329	0	0	0.00504611	0	0.00125905	0.00398601	0	0	0	0	0
137	Small proline-rich protein 2A OS=Homo sapiens GN=SPRR2A PE=1 SV=1	SPR2A_HUMAN (+4)	8	8.49	Homo sapiens	0.0139019	0	0.00562963	0.0143824	0	0	0.00298328	0	0	0.00384807	0	0	0	0	0
117	Ig heavy chain V-II region ARH-77 OS=Homo sapiens PE=4 SV=1	HV209_HUMAN	16	8.45	Homo sapiens	0	0	0	0	0	0.00309711	0.00260833	0	0.00258032	0.00261709	0	0	0	0	0
115	Ig kappa chain V-III region VG (Fragment) OS=Homo sapiens PE=1 SV=1	KV309_HUMAN	13	4.59	Homo sapiens	0	0	0	0	0	0	0	0	0	0.00236804	0	0	0	0	0
158	Resistin OS=Homo sapiens GN=RETN PE=2 SV=1	RETN_HUMAN	11	6.89	Homo sapiens	0	0	0	0	0	0.00579489	0.00161845	0	0.00536488	0.00189668	0	0	0	0	0
154	Ig kappa chain V-III region CLL OS=Homo sapiens PE=4 SV=2	KV308_HUMAN	14	8.7	Homo sapiens	0	0	0	0	0	0	0.00170473	0	0.00360702	0.00152503	0	0	0	0	0
172	Erythrocyte band 7 integral membrane protein OS=Homo sapiens GN=STOM PE=1 SV=3	STOM_HUMAN	32	8.07	Homo sapiens	0	0	0	0	0	0	0.000556341	0	0.00128634	0.000641345	0	0	0	0	0
123	Filaggrin OS=Homo sapiens GN=FLG PE=1 SV=3	FILA_HUMAN	435	9.6	Homo sapiens	0	0	0.000368101	0	0	0	0.000340358	0	0	9.62608e-05	0	0	0	0	0
64	Ig heavy chain V-III region TRO OS=Homo sapiens PE=1 SV=1	HV301_HUMAN	13	10	Homo sapiens	0	0	0	0	0	0	0	0	0.00515291	0	0	0	0	0	0
159	Complement factor H-related protein 1 OS=Homo sapiens GN=CFHR1 PE=1 SV=2	FHR1_HUMAN	38	7.42	Homo sapiens	0	0	0	0	0	0	0	0	0.00352568	0	0	0	0	0	0
178	Zinc-alpha-2-glycoprotein OS=Homo sapiens GN=AZGP1 PE=1 SV=2	ZA2G_HUMAN	34	5.92	Homo sapiens	0	0	0	0	0	0	0	0	0.00298383	0	0	0	0	0	0
143	Protein S100-A7 OS=Homo sapiens GN=S100A7 PE=1 SV=4	S10A7_HUMAN	11	6.78	Homo sapiens	0	0	0	0.0104599	0	0	0.00289676	0	0.00223194	0	0	0	0	0	0
139	Ig kappa chain V-III region B6 OS=Homo sapiens PE=1 SV=1	KV301_HUMAN	12	9.53	Homo sapiens	0	0	0	0	0	0	0.00265892	0	0.00207645	0	0	0	0	0	0
148	Trypsin-1 OS=Homo sapiens GN=PRSS1 PE=1 SV=1	TRY1_HUMAN	27	6.49	Homo sapiens	0	0	0	0	0	0.00355533	0	0	0.00187031	0	0	0	0	0	0
122	Ig heavy chain V-I region V35 OS=Homo sapiens PE=1 SV=1	HV103_HUMAN	13	9.87	Homo sapiens	0	0	0	0	0	0.00490337	0.00122391	0	0.00127782	0	0	0	0	0	0
174	Coagulation factor XII OS=Homo sapiens GN=F12 PE=1 SV=3	FA12_HUMAN	68	7.76	Homo sapiens	0	0	0	0	0	0	0.000234611	0	0.000862971	0	0	0	0	0	0
144	Lipopolysaccharide-binding protein OS=Homo sapiens GN=LBP PE=1 SV=3	LBP_HUMAN	53	6.68	Homo sapiens	0	0	0	0	0	0	0.00123732	0.0025611	0.000643975	0	0	0	0	0	0
171	Desmoglein-1 OS=Homo sapiens GN=DSG1 PE=1 SV=2	DSG1_HUMAN	114	4.66	Homo sapiens	0	0	0	0	0	0	0	0.0015288	0	0	0	0	0	0	0
132	Desmoplakin OS=Homo sapiens GN=DSP PE=1 SV=3	DESP_HUMAN	332	6.78	Homo sapiens	0	0	0.000135654	0	0	0	0	0.000816761	0	0	0	0	0	0	0
182	Junction plakoglobin OS=Homo sapiens GN=JUP PE=1 SV=3	PLAK_HUMAN	82	6.05	Homo sapiens	0	0.00154299	0	0	0	0	0	0.000470898	0	0	0	0	0	0	0
125	Filaggrin-2 OS=Homo sapiens GN=FLG2 PE=1 SV=1	FILA2_HUMAN	248	8.35	Homo sapiens	0	0.000338893	0.000833919	0	0	0	0.000340028	0.000468502	0	0	0	0	0	0	0
176	Keratin, type II cytoskeletal 6C OS=Homo sapiens GN=KRT6C PE=1 SV=3	K2C6C_HUMAN	60	8.16	Homo sapiens	0	0.00601796	0	0	0	0	0.00796646	0	0	0	0	0	0	0	0
82	Ig kappa chain V-I region AU OS=Homo sapiens PE=1 SV=1	KV102_HUMAN	12	4.34	Homo sapiens	0	0	0	0	0	0	0.00667609	0	0	0	0	0	0	0	0
156	Ig kappa chain V-III region IARC/BL41 OS=Homo sapiens PE=4 SV=1	KV311_HUMAN	14	4.59	Homo sapiens	0	0	0	0	0	0	0.00582369	0	0	0	0	0	0	0	0
100	Ig heavy chain V-III region WEA OS=Homo sapiens PE=1 SV=1	HV302_HUMAN	12	8.7	Homo sapiens	0	0	0	0	0	0	0.00398838	0	0	0	0	0	0	0	0
167	Ig heavy chain V-III region BUT OS=Homo sapiens PE=1 SV=1	HV306_HUMAN	12	9.48	Homo sapiens	0	0	0	0	0	0	0.00265892	0	0	0	0	0	0	0	0
126	Ig heavy chain V-III region GA OS=Homo sapiens PE=1 SV=1	HV308_HUMAN	13	10.02	Homo sapiens	0.00578405	0	0	0	0	0	0.00244782	0	0	0	0	0	0	0	0
134	Lysozyme C OS=Homo sapiens GN=LYZ PE=1 SV=1	LYSC_HUMAN	17	9.35	Homo sapiens	0.0044231	0.00256042	0	0	0	0.0039014	0.00187437	0	0	0	0	0	0	0	0
185	Suprabasin OS=Homo sapiens GN=SBSN PE=1 SV=2	SBSN_HUMAN	61	7.01	Homo sapiens	0	0	0	0	0	0	0.000291851	0	0	0	0	0	0	0	0
163	Desmocollin-1 OS=Homo sapiens GN=DSC1 PE=1 SV=2	DSC1_HUMAN	100	5.08	Homo sapiens	0.000372839	0.000840454	0	0	0	0	0.000178029	0	0	0	0	0	0	0	0
133	Protein S100-A8 OS=Homo sapiens GN=S100A8 PE=1 SV=1	S10A8_HUMAN	11	7.07	Homo sapiens	0	0	0.00614141	0.0237226	0	0.00719071	0	0	0	0	0	0	0	0	0
94	Ig kappa chain V-II region RPMI 6410 OS=Homo sapiens PE=4 SV=1	KV206_HUMAN	15	9.53	Homo sapiens	0.0111215	0	0	0	0	0.00332879	0	0	0	0	0	0	0	0	0
179	ATP synthase subunit alpha, mitochondrial OS=Homo sapiens GN=ATP5A1 PE=1 SV=1	ATPA_HUMAN	60	9.56	Homo sapiens	0	0	0	0	0	0.000554798	0	0	0	0	0	0	0	0	0
151	Elongation factor 1-alpha 1 OS=Homo sapiens GN=EEF1A1 PE=1 SV=1	EF1A1_HUMAN (+2)	50	9.5	Homo sapiens	0.00333645	0	0	0	0.00415108	0	0	0	0	0	0	0	0	0	0
199	Sodium-dependent phosphate transporter 2 OS=Homo sapiens GN=SLC20A2 PE=1 SV=1	S20A2_HUMAN	70	6.09	Homo sapiens	0	0	0	0	0.000786301	0	0	0	0	0	0	0	0	0	0
146	Calmodulin-like protein 5 OS=Homo sapiens GN=CALML5 PE=1 SV=2	CALL5_HUMAN	16	4.05	Homo sapiens	0.00462069	0	0.00292017	0	0	0	0	0	0	0	0	0	0	0	0
165	Ubiquitin-60S ribosomal protein L40 OS=Homo sapiens GN=UBA52 PE=1 SV=2	RL40_HUMAN (+3)	15	10.51	Homo sapiens	0.00741433	0	0	0	0	0	0	0	0	0	0	0	0	0	0
197	40S ribosomal protein S13 OS=Homo sapiens GN=RPS13 PE=1 SV=2	RS13_HUMAN	17	11.19	Homo sapiens	0.00431212	0	0	0	0	0	0	0	0	0	0	0	0	0	0
193	Glyceraldehyde-3-phosphate dehydrogenase OS=Homo sapiens GN=GAPDH PE=1 SV=3	G3P_HUMAN	36	8.73	Homo sapiens	0.0026152	0	0	0	0	0	0	0	0	0	0	0	0	0	0
196	GTP-binding nuclear protein Ran OS=Homo sapiens GN=RAN PE=1 SV=3	RAN_HUMAN	24	7.59	Homo sapiens	0.0015535	0	0	0	0	0	0	0	0	0	0	0	0	0	0
177	Adenosylhomocysteinase OS=Homo sapiens GN=AHCY PE=1 SV=4	SAHH_HUMAN	48	6.29	Homo sapiens	0.000789767	0	0	0	0	0	0	0	0	0	0	0	0	0	0
[truncated: 7 more columns]

## Sheet: Category
							CHOL					DOPG					DOTAP							Acute phase																		Coagulation
							17.9913	15.8211	14.5376	11.4512	11.2674	20.6391	40.3784	17.2142	39.6391	31.8876	47.3435	0	47.7883	25.6368	40.5912			Accession Number	CHOL_A	CHOL_B	CHOL_C	CHOL_D	CHOL_E	DOPG_A	DOPG_B	DOPG_C	DOPG_D	DOPG_E	DOTAP_A	DOTAP_B	DOTAP_C	DOTAP_D	DOTAP_E			Accession Number	CHOL_A	CHOL_B	CHOL_C	CHOL_D	CHOL_E	DOPG_A	DOPG_B
#	Identified Proteins (200)	Accession Number	Category	Molecular Weight	pI	Taxonomy	CHOL_A	CHOL_B	CHOL_C	CHOL_D	CHOL_E	DOPG_A	DOPG_B	DOPG_C	DOPG_D	DOPG_E	DOTAP_A	DOTAP_B	DOTAP_C	DOTAP_D	DOTAP_E			A1AG1_HUMAN	0	0	0	0.00727935	0	0	0	0	0.00878644	0	0.00968204	0	0.00377076	0.00162142	0.00137081			A2AP_HUMAN	0	0	0	0	0	0	0
76	Alpha-1-acid glycoprotein 1 OS=Homo sapiens GN=ORM1 PE=1 SV=1	A1AG1_HUMAN	Acute phase	24	4.66	Homo sapiens	0	0	0	0.00727935	0	0	0	0	0.00878644	0	0.00968204	0	0.00377076	0.00162142	0.00137081			A1AG2_HUMAN	0	0	0	0	0	0	0	0	0.00487635	0	0.00762482	0	0.00319673	0	0			ANT3_HUMAN	0	0	0	0	0	0	0
124	Alpha-1-acid glycoprotein 2 OS=Homo sapiens GN=ORM2 PE=1 SV=2	A1AG2_HUMAN	Acute phase	24	4.76	Homo sapiens	0	0	0	0	0	0	0	0	0.00487635	0	0.00762482	0	0.00319673	0	0			A1AT_HUMAN	0	0.0017882	0	0.0242063	0	0	0.00247307	0	0.0146771	0	0.0106324	0	0.00607502	0.00442435	0.00436757			FA9_HUMAN	0	0	0	0	0	0	0
65	Alpha-1-antichymotrypsin OS=Homo sapiens GN=SERPINA3 PE=1 SV=2	AACT_HUMAN	Acute phase	48	5.19	Homo sapiens	0	0	0	0	0	0	0	0	0.00385266	0	0.00585388	0	0.0046573	0.00325235	0.00308033			A1BG_HUMAN	0	0	0	0	0	0	0	0	0.00201346	0	0.00207778	0	0.00141061	0.00048042	0			FA5_HUMAN	0	0	0	0	0	0.000253952	0.000228746
36	Alpha-1-antitrypsin OS=Homo sapiens GN=SERPINA1 PE=1 SV=3	A1AT_HUMAN	Acute phase	47	5.31	Homo sapiens	0	0.0017882	0	0.0242063	0	0	0.00247307	0	0.0146771	0	0.0106324	0	0.00607502	0.00442435	0.00436757			A2MG_HUMAN	0.00409572	0.00569421	0.00548215	0.00822646	0.00643296	0	0.00141973	0	0.00851943	0.000641781	0.00518456	0	0.0055318	0.00566265	0.00564293			FA7_HUMAN	0	0	0	0	0	0	0
111	Alpha-1B-glycoprotein OS=Homo sapiens GN=A1BG PE=1 SV=4	A1BG_HUMAN	Acute phase	54	5.71	Homo sapiens	0	0	0	0	0	0	0	0	0.00201346	0	0.00207778	0	0.00141061	0.00048042	0			AACT_HUMAN	0	0	0	0	0	0	0	0	0.00385266	0	0.00585388	0	0.0046573	0.00325235	0.00308033			FA10_HUMAN	0	0	0	0	0	0	0
72	Alpha-2-HS-glycoprotein OS=Homo sapiens GN=AHSG PE=1 SV=1	FETUA_HUMAN	Acute phase	39	5.52	Homo sapiens	0	0	0	0.00152937	0	0	0	0	0.0015078	0	0.00684504	0	0.00429848	0.00433327	0.00336622			CRP_HUMAN	0	0	0	0	0	0	0	0	0	0	0.00646293	0	0.0042164	0.00312052	0.00854331			FA12_HUMAN	0	0	0	0	0	0	0.000234611
15	Alpha-2-macroglobulin OS=Homo sapiens GN=A2M PE=1 SV=3	A2MG_HUMAN	Acute phase	163	6.43	Homo sapiens	0.00409572	0.00569421	0.00548215	0.00822646	0.00643296	0	0.00141973	0	0.00851943	0.000641781	0.00518456	0	0.0055318	0.00566265	0.00564293			FETUA_HUMAN	0	0	0	0.00152937	0	0	0	0	0.0015078	0	0.00684504	0	0.00429848	0.00433327	0.00336622			FIBA_HUMAN	0.00174938	0.000884689	0	0.00705477	0.00281533	0.00119526	0.0012973
84	C-reactive protein OS=Homo sapiens GN=CRP PE=1 SV=1	CRP_HUMAN	Acute phase	25	5.32	Homo sapiens	0	0	0	0	0	0	0	0	0	0	0.00646293	0	0.0042164	0.00312052	0.00854331			GP1BA_HUMAN	0	0	0	0	0	0	0	0	0	0	0	0	0.000195417	0	0			FIBB_HUMAN	0.0069622	0.00711304	0	0.0104063	0.00743771	0.0158708	0.00809128
19	Haptoglobin OS=Homo sapiens GN=HP PE=1 SV=1	HPT_HUMAN	Acute phase	45	6.56	Homo sapiens	0.0119709	0.0130359	0.00658849	0.0271046	0.00388548	0.00073413	0.00658026	0.00431279	0.0269359	0.00464772	0.0285895	0	0.0164956	0.0156041	0.00949148			HPT_HUMAN	0.0119709	0.0130359	0.00658849	0.0271046	0.00388548	0.00073413	0.00658026	0.00431279	0.0269359	0.00464772	0.0285895	0	0.0164956	0.0156041	0.00949148			FIBG_HUMAN	0.00605774	0.00408716	0	0.00784512	0.00853908	0.0118089	0.00729875
78	Haptoglobin-related protein OS=Homo sapiens GN=HPR PE=2 SV=2	HPTR_HUMAN	Acute phase	39	7.11	Homo sapiens	0.00340207	0	0.0064473	0	0.00149997	0.00372876	0.00527435	0	0.0163898	0.00455843	0.019098	0	0.0131092	0.00434369	0.00842392			HPTR_HUMAN	0.00340207	0	0.0064473	0	0.00149997	0.00372876	0.00527435	0	0.0163898	0.00455843	0.019098	0	0.0131092	0.00434369	0.00842392			ITB3_HUMAN	0	0	0	0	0	0	0
52	Histidine-rich glycoprotein OS=Homo sapiens GN=HRG PE=1 SV=1	HRG_HUMAN	Acute phase	60	7.52	Homo sapiens	0	0	0	0	0	0.00483008	0.00178817	0	0.00363382	0	0.00681935	0	0.00454808	0.00346628	0.00314703			HRG_HUMAN	0	0	0	0	0	0.00483008	0.00178817	0	0.00363382	0	0.00681935	0	0.00454808	0.00346628	0.00314703			KNG1_HUMAN	0	0	0	0.000800413	0	0	0
144	Lipopolysaccharide-binding protein OS=Homo sapiens GN=LBP PE=1 SV=3	LBP_HUMAN	Acute phase	53	6.68	Homo sapiens	0	0	0	0	0	0	0.00123732	0.0025611	0.000643975	0	0	0	0	0	0			LBP_HUMAN	0	0	0	0	0	0	0.00123732	0.0025611	0.000643975	0	0	0	0	0	0			PLMN_HUMAN	0.00224293	0.000890512	0	0	0	0.00245445	0.00290405
200	Platelet glycoprotein Ib alpha chain OS=Homo sapiens GN=GP1BA PE=1 SV=2	GP1BA_HUMAN	Acute phase	72	6.24	Homo sapiens	0	0	0	0	0	0	0	0	0	0	0	0	0.000195417	0	0			SAA2_HUMAN	0	0	0	0	0	0	0	0	0	0	0.00651754	0	0.00196809	0	0.00234426			THRB_HUMAN	0.00395848	0	0	0	0	0	0
160	Serum amyloid A-2 protein OS=Homo sapiens GN=SAA2 PE=1 SV=1	SAA2_HUMAN	Acute phase	14	9.48	Homo sapiens	0	0	0	0	0	0	0	0	0	0	0.00651754	0	0.00196809	0	0.00234426			SAA4_HUMAN	0	0	0	0	0	0	0	0	0	0	0	0	0.000954999	0	0			TSP1_HUMAN	0	0	0	0	0	0	0
186	Serum amyloid A-4 protein OS=Homo sapiens GN=SAA4 PE=1 SV=2	SAA4_HUMAN	Acute phase	15	9.38	Homo sapiens	0	0	0	0	0	0	0	0	0	0	0	0	0.000954999	0	0			SAMP_HUMAN	0.00144089	0	0	0	0	0	0.000712116	0	0	0	0.00169074	0	0.00196163	0.00519964	0.00196759			TSP4_HUMAN	0	0	0	0	0	0	0
112	Serum amyloid P-component OS=Homo sapiens GN=APCS PE=1 SV=2	SAMP_HUMAN	Acute phase	25	6.52	Homo sapiens	0.00144089	0	0	0	0	0	0.000712116	0	0	0	0.00169074	0	0.00196163	0.00519964	0.00196759																					VTDB_HUMAN	0	0	0	0.00661164	0	0	0
120	Alpha-2-antiplasmin OS=Homo sapiens GN=SERPINF2 PE=1 SV=3	A2AP_HUMAN	Coagulation	55	6.24	Homo sapiens	0	0	0	0	0	0	0	0	0	0	0.0023108	0	0.000390681	0	0.00119644																					PROC_HUMAN	0	0	0	0	0	0	0
129	Antithrombin-III OS=Homo sapiens GN=SERPINC1 PE=1 SV=1	ANT3_HUMAN	Coagulation	53	6.68	Homo sapiens	0	0	0	0	0	0	0	0	0.00316096	0	0.00133985	0	0	0	0																					PROS_HUMAN	0	0	0	0	0	0	0
53	Coagulation factor IX OS=Homo sapiens GN=F9 PE=1 SV=2	FA9_HUMAN	Coagulation	52	5.16	Homo sapiens	0	0	0	0	0	0	0	0	0	0	0.00784561	0	0.00659184	0.00700173	0.0067902																					PROZ_HUMAN	0	0	0	0	0	0	0
80	Coagulation factor V OS=Homo sapiens GN=F5 PE=1 SV=4	FA5_HUMAN	Coagulation	252	5.95	Homo sapiens	0	0	0	0	0	0.000253952	0.000228746	0	0.00020039	0.000248956	0.000534106	0	0.000639805	0.000412974	6.52869e-05
190	Coagulation factor VII OS=Homo sapiens GN=F7 PE=1 SV=1	FA7_HUMAN	Coagulation	52	7.23	Homo sapiens	0	0	0	0	0	0	0	0	0	0	0.000273257	0	0	0	0
74	Coagulation factor X OS=Homo sapiens GN=F10 PE=1 SV=2	FA10_HUMAN	Coagulation	55	5.74	Homo sapiens	0	0	0	0	0	0	0	0	0	0	0.00447997	0	0.00318125	0.00401931	0.00343313
174	Coagulation factor XII OS=Homo sapiens GN=F12 PE=1 SV=3	FA12_HUMAN	Coagulation	68	7.76	Homo sapiens	0	0	0	0	0	0	0.000234611	0	0.000862971	0	0	0	0	0	0
41	Fibrinogen alpha chain OS=Homo sapiens GN=FGA PE=1 SV=2	FIBA_HUMAN	Coagulation	95	5.87	Homo sapiens	0.00174938	0.000884689	0	0.00705477	0.00281533	0.00119526	0.0012973	0	0.00364561	0	0.00623398	0	0.0024201	0.00287388	0.00172868
13	Fibrinogen beta chain OS=Homo sapiens GN=FGB PE=1 SV=2	FIBB_HUMAN	Coagulation	56	8.38	Homo sapiens	0.0069622	0.00711304	0	0.0104063	0.00743771	0.0158708	0.00809128	0.00311096	0.015929	0.00708829	0.0238978	0	0.0265711	0.0222883	0.0221426
22	Fibrinogen gamma chain OS=Homo sapiens GN=FGG PE=1 SV=3	FIBG_HUMAN	Coagulation	52	5.32	Homo sapiens	0.00605774	0.00408716	0	0.00784512	0.00853908	0.0118089	0.00729875	0.00410218	0.0134564	0.00684092	0.0128594	0	0.0116832	0.0152518	0.0120016
136	Integrin beta-3 OS=Homo sapiens GN=ITGB3 PE=1 SV=2	ITB3_HUMAN	Coagulation	87	4.85	Homo sapiens	0	0	0	0	0	0	0	0	0.000964726	0	0	0	0	0.000447287	0.000283616
48	Kininogen-1 OS=Homo sapiens GN=KNG1 PE=1 SV=2	KNG1_HUMAN	Coagulation	72	6.8	Homo sapiens	0	0	0	0.000800413	0	0	0	0	0.00139812	0	0.0093735	0	0.00397963	0.00306956	0.00330747
31	Plasminogen OS=Homo sapiens GN=PLG PE=1 SV=2	PLMN_HUMAN	Coagulation	91	7.25	Homo sapiens	0.00224293	0.000890512	0	0	0	0.00245445	0.00290405	0.000429666	0.00479318	0.00137883	0.00689363	0	0.00499695	0.00442963	0.00866411
17	Prothrombin OS=Homo sapiens GN=F2 PE=1 SV=2	THRB_HUMAN	Coagulation	70	5.7	Homo sapiens	0.00395848	0	0	0	0	0	0	0	0.00144929	0	0.0350916	0	0.0220219	0.0159741	0.0218209
71	Thrombospondin-1 OS=Homo sapiens GN=THBS1 PE=1 SV=2	TSP1_HUMAN	Coagulation	129	4.51	Homo sapiens	0	0	0	0	0	0	0	0	0	0	0.00136126	0	0.00178976	0.0019146	0.00235518
87	Thrombospondin-4 OS=Homo sapiens GN=THBS4 PE=1 SV=2	TSP4_HUMAN	Coagulation	106	4.23	Homo sapiens	0	0	0	0	0	0	0	0	0	0	0.00232554	0	0.00197022	0.00245291	0.00224695
73	Vitamin D-binding protein OS=Homo sapiens GN=GC PE=1 SV=1	VTDB_HUMAN	Coagulation	53	5.21	Homo sapiens	0	0	0	0.00661164	0	0	0	0	0.00604503	0	0.00479464	0	0.000254401	0.00147183	0.0018593
97	Vitamin K-dependent protein C OS=Homo sapiens GN=PROC PE=1 SV=1	PROC_HUMAN	Coagulation	52	6.23	Homo sapiens	0	0	0	0	0	0	0	0	0	0	0.00257174	0	0.0024217	0.00250097	0.00157874
33	Vitamin K-dependent protein S OS=Homo sapiens GN=PROS1 PE=1 SV=1	PROS_HUMAN	Coagulation	75	5.37	Homo sapiens	0	0	0	0	0	0	0	0	0	0	0.012745	0	0.0102525	0.00727919	0.00613195
85	Vitamin K-dependent protein Z OS=Homo sapiens GN=PROZ PE=1 SV=2	PROZ_HUMAN	Coagulation	45	5.87	Homo sapiens	0	0	0	0	0	0	0	0	0	0	0.00375961	0	0.00386297	0	0.00437976
86	Complement C1q subcomponent subunit A OS=Homo sapiens GN=C1QA PE=1 SV=2	C1QA_HUMAN	Complement	26	9.45	Homo sapiens	0.00289203	0.00486635	0.00445883	0.0067194	0.00685787	0.00310153	0.00382056	0.00670319	0.00194224	0.0044406	0	0	0	0	0
77	Complement C1q subcomponent subunit B OS=Homo sapiens GN=C1QB PE=1 SV=3	C1QB_HUMAN	Complement	27	8.87	Homo sapiens	0.00688062	0.00150068	0	0	0	0	0.00761851	0	0.00251916	0.00462284	0.00182864	0	0.00310681	0	0.00243118
45	Complement C1q subcomponent subunit C OS=Homo sapiens GN=C1QC PE=1 SV=3	C1QC_HUMAN	Complement	26	8.58	Homo sapiens	0.0113622	0.0113288	0.0167436	0	0.0125908	0.011196	0.0114609	0.0156528	0.00453615	0.0108742	0.00403797	0	0.0050963	0.00550314	0.00442135
88	Complement C1r subcomponent OS=Homo sapiens GN=C1R PE=1 SV=2	C1R_HUMAN	Complement	80	6.14	Homo sapiens	0	0	0	0	0	0	0	0	0	0	0.00219999	0	0.00157936	0.00227618	0.00102669
62	Complement C1s subcomponent OS=Homo sapiens GN=C1S PE=1 SV=1	C1S_HUMAN	Complement	77	4.59	Homo sapiens	0	0	0	0	0	0	0	0	0	0	0.0046632	0	0.00532766	0.00152016	0.00191969
3	Complement C3 OS=Homo sapiens GN=C3 PE=1 SV=2	CO3_HUMAN	Complement	187	6.34	Homo sapiens	0.0102963	0.0111185	0.00600493	0.00979829	0.0150568	0.003646	0.00688537	0.00155666	0.00766789	0.00688109	0.0227626	0	0.0175972	0.0194019	0.0217392
10	Complement C4-A OS=Homo sapiens GN=C4A PE=1 SV=2	CO4A_HUMAN	Complement	193	7.08	Homo sapiens	0.00401904	0.00305504	0.0024977	0.00286388	0.00555042	0.00340762	0.00331873	0.001405	0.00228242	0.00211076	0.0104294	0	0.0118795	0.012665	0.00983101
119	Complement C4-B OS=Homo sapiens GN=C4B PE=1 SV=2	CO4B_HUMAN	Complement	193	7.28	Homo sapiens	0	0	0	0	0	0	0	0	0	0	0.0109758	0	0.0120971	0.00444701	0.0101711
39	Complement C5 OS=Homo sapiens GN=C5 PE=1 SV=4	CO5_HUMAN	Complement	188	6.49	Homo sapiens	0.00108733	0.000670575	0	0	0	0	0.000623071	0	0.000625575	0	0.00329576	0	0.00193085	0.00138309	0.00218376
141	Complement component C6 OS=Homo sapiens GN=C6 PE=1 SV=3	CO6_HUMAN	Complement	105	6.74	Homo sapiens	0	0	0	0	0	0	0	0	0	0	0.00181048	0	0	0	0
81	Complement component C8 alpha chain OS=Homo sapiens GN=C8A PE=1 SV=2	CO8A_HUMAN	Complement	65	6.41	Homo sapiens	0	0	0	0	0	0	0.000368158	0	0.000911658	0	0.00227767	0	0.00171442	0.00440118	0.00404325
116	Complement component C8 beta chain OS=Homo sapiens GN=C8B PE=1 SV=3	CO8B_HUMAN	Complement	67	8.17	Homo sapiens	0	0	0	0	0	0	0	0	0	0	0.000844571	0	0.000301863	0.000971663	0.00294163
110	Complement component C8 gamma chain OS=Homo sapiens GN=C8G PE=1 SV=3	CO8G_HUMAN	Complement	22	8.48	Homo sapiens	0	0	0	0	0	0	0	0	0	0	0.00353767	0	0.00380712	0.00531907	0.00821446
60	Complement component C9 OS=Homo sapiens GN=C9 PE=1 SV=2	CO9_HUMAN	Complement	63	5.27	Homo sapiens	0	0	0	0	0	0	0	0	0	0	0.00570005	0	0.00343068	0.00742972	0.00560528
130	Complement factor B OS=Homo sapiens GN=CFB PE=1 SV=2	CFAB_HUMAN	Complement	86	7.07	Homo sapiens	0	0	0	0.00171044	0	0	0	0	0.00195858	0	0.000732634	0	0	0	0
11	Complement factor H OS=Homo sapiens GN=CFH PE=1 SV=4	CFAH_HUMAN	Complement	139	6.59	Homo sapiens	0.0127904	0.0068556	0.00461976	0.0071266	0.0123594	0.00499039	0.00486773	0.00403655	0.00611892	0.00489744	0.0108907	0	0.00682919	0.00841711	0.00685425
159	Complement factor H-related protein 1 OS=Homo sapiens GN=CFHR1 PE=1 SV=2	FHR1_HUMAN	Complement	38	7.42	Homo sapiens	0	0	0	0	0	0	0	0	0.00352568	0	0	0	0	0	0
44	Ig alpha-1 chain C region OS=Homo sapiens GN=IGHA1 PE=1 SV=2	IGHA1_HUMAN	Immunoglobulins	38	6.49	Homo sapiens	0.00633561	0.00772549	0.00422442	0.00916845	0.0029879	0.00467225	0.00546238	0.00357206	0.00953282	0.00412743	0.00628678	0	0.00458565	0.00718455	0.0060524
69	Ig alpha-2 chain C region OS=Homo sapiens GN=IGHA2 PE=1 SV=3	IGHA2_HUMAN	Immunoglobulins	37	6.02	Homo sapiens	0.00950421	0.00615552	0.00676024	0	0	0.00386058	0.00558444	0	0.00287539	0	0.00283848	0	0.00659749	0.0119471	0.00354947
2	Ig gamma-1 chain C region OS=Homo sapiens GN=IGHG1 PE=1 SV=1	IGHG1_HUMAN	Immunoglobulins	36	8.31	Homo sapiens	0.0792865	0.1113	0.0815666	0.0857766	0.11293	0.0847341	0.0929875	0.0860958	0.0814625	0.1159	0.0281711	0	0.0383905	0.0502016	0.0396878
27	Ig gamma-2 chain C region OS=Homo sapiens GN=IGHG2 PE=1 SV=2	IGHG2_HUMAN	Immunoglobulins	36	7.66	Homo sapiens	0.0432622	0.0679008	0	0	0.0229338	0.0797481	0.0703619	0.0532569	0.0439359	0.0851994	0.0189484	0	0.0238392	0	0.0287396
16	Ig gamma-3 chain C region OS=Homo sapiens GN=IGHG3 PE=1 SV=2	IGHG3_HUMAN	Immunoglobulins	41	7.95	Homo sapiens	0.0564632	0.0628275	0.0402443	0.0461126	0.0766582	0.055496	0.0405713	0.0519726	0.0373372	0.063811	0.0185306	0	0.021268	0.0237816	0.0312407
96	Ig gamma-4 chain C region OS=Homo sapiens GN=IGHG4 PE=1 SV=1	IGHG4_HUMAN	Immunoglobulins	36	7.41	Homo sapiens	0	0	0	0	0	0	0.00883935	0	0.0273726	0	0.01215	0	0.0137417	0.0198658	0.0171082
122	Ig heavy chain V-I region V35 OS=Homo sapiens PE=1 SV=1	HV103_HUMAN	Immunoglobulins	13	9.87	Homo sapiens	0	0	0	0	0	0.00490337	0.00122391	0	0.00127782	0	0	0	0	0	0
117	Ig heavy chain V-II region ARH-77 OS=Homo sapiens PE=4 SV=1	HV209_HUMAN	Immunoglobulins	16	8.45	Homo sapiens	0	0	0	0	0	0.00309711	0.00260833	0	0.00258032	0.00261709	0	0	0	0	0
66	Ig heavy chain V-III region 23 OS=Homo sapiens GN=IGHV3-23 PE=1 SV=2	HV303_HUMAN	Immunoglobulins	13	8.46	Homo sapiens	0.00578405	0.00467519	0.0264936	0	0.00948181	0.0124666	0.0153534	0	0.0103595	0.00971547	0	0	0.00862704	0	0.00632712
167	Ig heavy chain V-III region BUT OS=Homo sapiens PE=1 SV=1	HV306_HUMAN	Immunoglobulins	12	9.48	Homo sapiens	0	0	0	0	0	0	0.00265892	0	0	0	0	0	0	0	0
126	Ig heavy chain V-III region GA OS=Homo sapiens PE=1 SV=1	HV308_HUMAN	Immunoglobulins	13	10.02	Homo sapiens	0.00578405	0	0	0	0	0	0.00244782	0	0	0	0	0	0	0	0
95	Ig heavy chain V-III region GAL OS=Homo sapiens PE=1 SV=1	HV320_HUMAN	Immunoglobulins	13	8.7	Homo sapiens	0.00578405	0.00829004	0.010585	0	0	0.011196	0.00511888	0.00295964	0.00452339	0.0104543	0	0	0.00534089	0	0.00252479
64	Ig heavy chain V-III region TRO OS=Homo sapiens PE=1 SV=1	HV301_HUMAN	Immunoglobulins	13	10	Homo sapiens	0	0	0	0	0	0	0	0	0.00515291	0	0	0	0	0	0
67	Ig heavy chain V-III region WAS OS=Homo sapiens PE=1 SV=1	HV315_HUMAN	Immunoglobulins	13	8.84	Homo sapiens	0	0	0	0	0	0	0.00342364	0	0	0	0	0	0.00633588	0	0
100	Ig heavy chain V-III region WEA OS=Homo sapiens PE=1 SV=1	HV302_HUMAN	Immunoglobulins	12	8.7	Homo sapiens	0	0	0	0	0	0	0.00398838	0	0	0	0	0	0	0	0
9	Ig kappa chain C region OS=Homo sapiens GN=IGKC PE=1 SV=1	IGKC_HUMAN	Immunoglobulins	12	5.68	Homo sapiens	0.0943107	0.0911032	0.147199	0.126411	0.0930728	0.219805	0.198126	0.180652	0.137804	0.202796	0.0288041	0	0.064506	0.0574162	0.0547557
82	Ig kappa chain V-I region AU OS=Homo sapiens PE=1 SV=1	KV102_HUMAN	Immunoglobulins	12	4.34	Homo sapiens	0	0	0	0	0	0	0.00667609	0	0	0	0	0	0	0	0
75	Ig kappa chain V-I region EU OS=Homo sapiens PE=1 SV=1	KV106_HUMAN	Immunoglobulins	12	8.46	Homo sapiens	0.0123484	0.0105438	0.00757354	0	0	0.0107525	0.0171416	0	0.00773439	0.0217816	0	0	0.00925137	0	0
188	Ig kappa chain V-I region Lay OS=Homo sapiens PE=1 SV=1	KV113_HUMAN	Immunoglobulins	12	4.53	Homo sapiens	0	0	0	0	0	0	0	0	0	0.00440742	0	0	0	0	0
94	Ig kappa chain V-II region RPMI 6410 OS=Homo sapiens PE=4 SV=1	KV206_HUMAN	Immunoglobulins	15	9.53	Homo sapiens	0.0111215	0	0	0	0	0.00332879	0	0	0	0	0	0	0	0	0
139	Ig kappa chain V-III region B6 OS=Homo sapiens PE=1 SV=1	KV301_HUMAN	Immunoglobulins	12	9.53	Homo sapiens	0	0	0	0	0	0	0.00265892	0	0.00207645	0	0	0	0	0	0
154	Ig kappa chain V-III region CLL OS=Homo sapiens PE=4 SV=2	KV308_HUMAN	Immunoglobulins	14	8.7	Homo sapiens	0	0	0	0	0	0	0.00170473	0	0.00360702	0.00152503	0	0	0	0	0
63	Ig kappa chain V-III region HAH OS=Homo sapiens PE=2 SV=1	KV312_HUMAN	Immunoglobulins	14	4.59	Homo sapiens	0.00807868	0.00289416	0.00655427	0	0	0.0115851	0.0217191	0	0.0138672	0.0171501	0.00803486	0	0	0	0
156	Ig kappa chain V-III region IARC/BL41 OS=Homo sapiens PE=4 SV=1	KV311_HUMAN	Immunoglobulins	14	4.59	Homo sapiens	0	0	0	0	0	0	0.00582369	0	0	0	0	0	0	0	0
115	Ig kappa chain V-III region VG (Fragment) OS=Homo sapiens PE=1 SV=1	KV309_HUMAN	Immunoglobulins	13	4.59	Homo sapiens	0	0	0	0	0	0	0	0	0	0.00236804	0	0	0	0	0
99	Ig kappa chain V-IV region (Fragment) OS=Homo sapiens GN=IGKV4-1 PE=4 SV=1	KV401_HUMAN	Immunoglobulins	13	4.85	Homo sapiens	0.005687	0	0	0	0	0.012377	0.00702916	0	0.00646563	0.00556471	0	0	0.00480954	0	0.00883954
118	Ig lambda chain V-I region HA OS=Homo sapiens PE=1 SV=1	LV102_HUMAN	Immunoglobulins	12	5.6	Homo sapiens	0	0	0	0	0	0.00275299	0.00480189	0	0.00284422	0.00609738	0	0	0.00287915	0	0.00272833
121	Ig lambda chain V-I region NIG-64 OS=Homo sapiens PE=1 SV=1	LV104_HUMAN	Immunoglobulins	11	5.69	Homo sapiens	0	0	0.0103459	0	0.00531809	0	0	0	0.00148796	0	0.00129176	0	0	0	0
103	Ig lambda chain V-III region LOI OS=Homo sapiens PE=1 SV=1	LV302_HUMAN	Immunoglobulins	12	4.72	Homo sapiens	0.0107688	0	0	0	0	0.013516	0.00687136	0	0.0083684	0.004304	0.00417147	0	0.00285791	0	0
131	Ig lambda chain V-III region SH OS=Homo sapiens PE=1 SV=1	LV301_HUMAN	Immunoglobulins	11	6.5	Homo sapiens	0	0	0	0	0	0	0.00677281	0	0.00375319	0	0	0	0	0	0.00448676
14	Ig lambda-3 chain C regions OS=Homo sapiens GN=IGLC3 PE=1 SV=1	LAC3_HUMAN	Immunoglobulins	11	7.34	Homo sapiens	0.0859388	0.0941336	0.108645	0.121736	0.135122	0.114662	0.0647453	0.1232	0.0611154	0.0874846	0.0352194	0	0.0564173	0.0685595	0.0634463
5	Ig mu chain C region OS=Homo sapiens GN=IGHM PE=1 SV=3	IGHM_HUMAN	Immunoglobulins	49	6.77	Homo sapiens	0.0351288	0.0456517	0.0917703	0.0279351	0.0850879	0.0418111	0.0379909	0.0763112	0.0223504	0.0475926	0.0136452	0	0.0367245	0.0177773	0.0249725
56	Immunoglobulin J chain OS=Homo sapiens GN=IGJ PE=1 SV=4	IGJ_HUMAN	Immunoglobulins	18	4.87	Homo sapiens	0.0102859	0.0105438	0.016563	0.00497044	0.0166577	0.00894597	0.0100995	0.0150512	0.00557893	0.00985362	0.00233827	0	0.00661934	0.00216735	0.00684112
43	Immunoglobulin lambda-like polypeptide 5 OS=Homo sapiens GN=IGLL5 PE=2 SV=2	IGLL5_HUMAN	Immunoglobulins	23	9.05	Homo sapiens	0.0289441	0.0193192	0.0058744	0	0.0148847	0.0449086	0.0302322	0	0.0248235	0.0332112	0.00671443	0	0.0154036	0.00451177	0.0224919
28	Apolipoprotein A-I OS=Homo sapiens GN=APOA1 PE=1 SV=1	APOA1_HUMAN	Lipoproteins	31	5.5	Homo sapiens	0.0107831	0.00341319	0.0103306	0.0319222	0	0	0.00526148	0.00811884	0.0181456	0	0.0222779	0	0.0182657	0.0155207	0.0145714
106	Apolipoprotein A-II OS=Homo sapiens GN=APOA2 PE=1 SV=1	APOA2_HUMAN	Lipoproteins	11	6.6	Homo sapiens	0	0	0	0.0104599	0	0	0	0	0.0115292	0	0.00449832	0	0.00445825	0	0.00522336
58	Apolipoprotein A-IV OS=Homo sapiens GN=APOA4 PE=1 SV=3	APOA4_HUMAN	Lipoproteins	45	5.05	Homo sapiens	0	0	0	0	0	0	0	0	0.00485517	0	0.00549314	0	0.0091678	0.00780058	0.00456254
1	Apolipoprotein B-100 OS=Homo sapiens GN=APOB PE=1 SV=2	APOB_HUMAN	Lipoproteins	516	7.04	Homo sapiens	0.00423657	0.0076279	0.00173255	0.0041822	0.00407842	0.00701593	0.00443949	0.000825046	0.00450185	0.00397039	0.00747	0	0.00516407	0.00496444	0.00318284
162	Apolipoprotein C-I OS=Homo sapiens GN=APOC1 PE=1 SV=1	APOC1_HUMAN	Lipoproteins	9	9.17	Homo sapiens	0	0	0	0	0	0	0	0	0	0	0	0	0.00159166	0	0.00182803
98	Apolipoprotein C-II OS=Homo sapiens GN=APOC2 PE=1 SV=1	APOC2_HUMAN	Lipoproteins	11	4.36	Homo sapiens	0.00344625	0	0	0	0	0	0	0	0	0	0.0185049	0	0.00445825	0	0.00597482
50	Apolipoprotein C-III OS=Homo sapiens GN=APOC3 PE=1 SV=1	APOC3_HUMAN	Lipoproteins	11	5.04	Homo sapiens	0.0134709	0.00754527	0.00826204	0	0	0	0	0	0	0	0.0307605	0	0.0164809	0.0141896	0.0350789
20	Apolipoprotein D OS=Homo sapiens GN=APOD PE=1 SV=1	APOD_HUMAN	Lipoproteins	21	4.79	Homo sapiens	0.0238169	0.0462239	0.0262298	0.0346972	0.0367484	0.0253576	0.0193908	0.0165984	0.0204514	0.0164033	0.0298587	0	0.0388991	0.0588208	0.0305018
40	Apolipoprotein E OS=Homo sapiens GN=APOE PE=1 SV=1	APOE_HUMAN	Lipoproteins	36	5.42	Homo sapiens	0.00463395	0	0	0	0	0	0	0	0.00163345	0	0.0146766	0	0.013764	0.0184247	0.0157396
164	Apolipoprotein F OS=Homo sapiens GN=APOF PE=1 SV=2	APOF_HUMAN	Lipoproteins	35	5.36	Homo sapiens	0	0	0	0	0	0	0	0	0	0	0	0	0.000787237	0	0.000701569
70	Apolipoprotein M OS=Homo sapiens GN=APOM PE=1 SV=2	APOM_HUMAN	Lipoproteins	21	5.92	Homo sapiens	0	0	0	0	0	0	0	0	0	0	0.0107406	0	0.010621	0.00557833	0.0074266
54	Apolipoprotein(a) OS=Homo sapiens GN=LPA PE=1 SV=1	APOA_HUMAN	Lipoproteins	501	5.77	Homo sapiens	0.00014632	0.00113737	0.000411992	0.00104633	0.000116764	0	0.000479802	0	0.000571856	0.000168518	2.72121e-05	0	0.000320901	0.000337082	0.00024603
83	Beta-2-glycoprotein 1 OS=Homo sapiens GN=APOH PE=1 SV=3	APOH_HUMAN	Lipoproteins	38	8.03	Homo sapiens	0	0	0	0	0	0	0.00175063	0.0127284	0.00553739	0.0016529	0	0	0.000354822	0	0.000432956
57	Clusterin OS=Homo sapiens GN=CLU PE=1 SV=1	CLUS_HUMAN	Lipoproteins	52	6.21	Homo sapiens	0	0	0	0	0	0	0	0	0.00193989	0	0.00597504	0	0.00779912	0.00500258	0.00268521
30	Serum paraoxonase/arylesterase 1 OS=Homo sapiens GN=PON1 PE=1 SV=3	PON1_HUMAN	Lipoproteins	40	4.89	Homo sapiens	0.00278037	0	0	0	0	0	0	0	0	0	0.021092	0	0.0268187	0.0269798	0.0158087
153	Serum paraoxonase/lactonase 3 OS=Homo sapiens GN=PON3 PE=1 SV=3	PON3_HUMAN	Lipoproteins	40	5.1	Homo sapiens	0	0	0	0	0	0	0	0	0	0	0	0	0.00311983	0	0
25	CD5 antigen-like OS=Homo sapiens GN=CD5L PE=1 SV=1	CD5L_HUMAN	Others	38	5.15	Homo sapiens	0.0136442	0.0160753	0.0313621	0.013005	0.0334874	0.0110493	0.0108506	0.0346561	0.00883807	0.0151224	0.00537942	0	0.00971999	0.00615963	0.00994013
169	Hemoglobin subunit alpha OS=Homo sapiens GN=HBA1 PE=1 SV=2	HBA_HUMAN	Others	15	9.09	Homo sapiens	0	0	0	0	0	0	0	0	0	0	0.000947292	0	0	0	0
166	Hemoglobin subunit beta OS=Homo sapiens GN=HBB PE=1 SV=2	HBB_HUMAN	Others	16	7.32	Homo sapiens	0	0	0	0	0	0	0	0	0	0	0.00264179	0	0	0	0
55	Protein AMBP OS=Homo sapiens GN=AMBP PE=1 SV=1	AMBP_HUMAN	Others	39	6.15	Homo sapiens	0	0	0	0	0	0	0	0	0.00194224	0	0.0106753	0	0.00840251	0.00666857	0.00863494
23	Serotransferrin OS=Homo sapiens GN=TF PE=1 SV=3	TRFE_HUMAN	Others	77	7.13	Homo sapiens	0.00264254	0.00272788	0.00178753	0.026507	0.0111352	0	0.00432003	0.00100116	0.0207898	0.00203691	0.00384634	0	0.00380712	0.00422108	0.00575962
4	Serum albumin OS=Homo sapiens GN=ALB PE=1 SV=2	ALBU_HUMAN	Others	69	6.21	Homo sapiens	0.0287607	0.0253924	0.0222698	0.0945698	0.0500871	0.00893319	0.0204736	0.023579	0.0917398	0.0152987	0.026334	0	0.0228375	0.0309039	0.0221355
104	Actin, cytoplasmic 1 OS=Homo sapiens GN=ACTB PE=1 SV=1	ACTB_HUMAN	Tissue Linkage	42	5.16	Homo sapiens	0.00485209	0	0	0	0.00139283	0	0.00215317	0	0	0	0.0011687	0	0	0.00185745	0.00175971
145	Gelsolin OS=Homo sapiens GN=GSN PE=1 SV=1	GELS_HUMAN	Tissue Linkage	86	6.19	Homo sapiens	0	0	0	0	0	0	0	0	0.000682349	0	0.00098299	0	0.000743634	0	0
18	Keratin, type I cytoskeletal 10 OS=Homo sapiens GN=KRT10 PE=1 SV=6	K1C10_HUMAN	Tissue Linkage	59	4.88	Homo sapiens	0.0207137	0.0243516	0.0322767	0.0221689	0.00917804	0.00985004	0.0113635	0.0206806	0.00800006	0.0113319	0.00644775	0	0.00343971	0.0134399	0.00723719
51	Keratin, type I cytoskeletal 14 OS=Homo sapiens GN=KRT14 PE=1 SV=4	K1C14_HUMAN	Tissue Linkage	52	4.81	Homo sapiens	0.0142241	0.024245	0.0150361	0.00554132	0	0.0118089	0.00932605	0.0242057	0.00535693	0.00823865	0	0	0	0.00725003	0
34	Keratin, type I cytoskeletal 16 OS=Homo sapiens GN=KRT16 PE=1 SV=4	K1C16_HUMAN	Tissue Linkage	51	4.69	Homo sapiens	0.015308	0.0330075	0.0175624	0.00733515	0.00648662	0.0110638	0.00919568	0.0223845	0.00396065	0.00799444	0.00248639	0	0.000810391	0.00535202	0.00112577
93	Keratin, type I cytoskeletal 17 OS=Homo sapiens GN=KRT17 PE=1 SV=2	K1C17_HUMAN	Tissue Linkage	48	4.67	Homo sapiens	0.0111572	0.0157639	0.00663527	0	0	0	0.00533897	0.0169312	0	0.00149647	0	0	0	0	0.000685406
12	Keratin, type I cytoskeletal 9 OS=Homo sapiens GN=KRT9 PE=1 SV=3	K1C9_HUMAN	Tissue Linkage	62	4.89	Homo sapiens	0.0323896	0.0363505	0.0299282	0.027234	0.017727	0.0111881	0.0155906	0.0406004	0.00774298	0.0143119	0.00451925	0	0.0021351	0.0125814	0.00556303
8	Keratin, type II cytoskeletal 1 OS=Homo sapiens GN=KRT1 PE=1 SV=6	K2C1_HUMAN	Tissue Linkage	66	8.33	Homo sapiens	0.0348742	0.0436345	0.05043	0.0476146	0.0270158	0.0220331	0.0220085	0.0498735	0.0115628	0.0199654	0.00937046	0	0.00571067	0.0208841	0.010699
29	Keratin, type II cytoskeletal 2 epidermal OS=Homo sapiens GN=KRT2 PE=1 SV=2	K22E_HUMAN	Tissue Linkage	65	8.17	Homo sapiens	0.0165461	0.0158538	0.0247309	0.0143084	0.0108762	0.0101795	0.00930661	0.0172934	0.00427293	0.00835818	0.00402155	0	0.00246497	0.00940053	0.00480064
47	Keratin, type II cytoskeletal 5 OS=Homo sapiens GN=KRT5 PE=1 SV=3	K2C5_HUMAN	Tissue Linkage	62	7.91	Homo sapiens	0.0131578	0.0133133	0.0129605	0.0112907	0.0049703	0.00648898	0.00557708	0.0187401	0.00363931	0.00488999	0.000916735	0	0	0.00629085	0.00304684
42	Keratin, type II cytoskeletal 6A OS=Homo sapiens GN=KRT6A PE=1 SV=3	K2C6A_HUMAN	Tissue Linkage	60	8.16	Homo sapiens	0.0126591	0.0185834	0.0141572	0.00575463	0.007807	0.00940847	0.00796646	0.0255081	0.000830582	0.00573993	0	0	0	0.00606717	0
176	Keratin, type II cytoskeletal 6C OS=Homo sapiens GN=KRT6C PE=1 SV=3	K2C6C_HUMAN	Tissue Linkage	60	8.16	Homo sapiens	0	0.00601796	0	0	0	0	0.00796646	0	0	0	0	0	0	0	0
7	Vitronectin OS=Homo sapiens GN=VTN PE=1 SV=1	VTNC_HUMAN	Tissue Linkage	54	5.54	Homo sapiens	0.0297714	0.00658982	0	0.00160083	0.0060042	0	0.00136213	0	0.00249169	0.00174269	0.0554887	0	0.0449092	0.062365	0.0878951
197	40S ribosomal protein S13 OS=Homo sapiens GN=RPS13 PE=1 SV=2	RS13_HUMAN		17	11.19	Homo sapiens	0.00431212	0	0	0	0	0	0	0	0	0	0	0	0	0	0
177	Adenosylhomocysteinase OS=Homo sapiens GN=AHCY PE=1 SV=4	SAHH_HUMAN		48	6.29	Homo sapiens	0.000789767	0	0	0	0	0	0	0	0	0	0	0	0	0	0
181	Afamin OS=Homo sapiens GN=AFM PE=1 SV=1	AFAM_HUMAN		69	5.7	Homo sapiens	0	0	0	0	0	0	0	0	0.000731859	0	0.000505447	0	0	0	0
187	Aggrecan core protein OS=Homo sapiens GN=ACAN PE=1 SV=2	PGCA_HUMAN		250	3.82	Homo sapiens	0	0	0	0	0	0	0	0	0	0	0	0	8.08994e-05	0	0
140	Angiotensinogen OS=Homo sapiens GN=AGT PE=1 SV=1	ANGT_HUMAN		53	6.27	Homo sapiens	0	0	0	0	0	0	0	0	0.000952797	0	0.00160048	0	0.000270283	0	0
179	ATP synthase subunit alpha, mitochondrial OS=Homo sapiens GN=ATP5A1 PE=1 SV=1	ATPA_HUMAN		60	9.56	Homo sapiens	0	0	0	0	0	0.000554798	0	0	0	0	0	0	0	0	0
135	ATP synthase subunit beta, mitochondrial OS=Homo sapiens GN=ATP5B PE=1 SV=3	ATPB_HUMAN		57	5.07	Homo sapiens	0.000654104	0	0	0	0	0.00197168	0.000559024	0	0.00102951	0.00146369	0	0	0	0	0.000575829
142	Beta-Ala-His dipeptidase OS=Homo sapiens GN=CNDP1 PE=1 SV=4	CNDP1_HUMAN		57	4.95	Homo sapiens	0	0	0	0	0	0	0	0	0	0	0	0	0.00341707	0	0
6	C4b-binding protein alpha chain OS=Homo sapiens GN=C4BPA PE=1 SV=2	C4BPA_HUMAN		67	7.31	Homo sapiens	0.0152034	0.0135507	0.0123042	0.0052301	0.0597752	0.0110909	0.0231142	0.007812	0.00464438	0.0223343	0.0308924	0	0.0388493	0.0516206	0.0276991
61	C4b-binding protein beta chain OS=Homo sapiens GN=C4BPB PE=1 SV=1	C4BPB_HUMAN		28	4.8	Homo sapiens	0	0	0	0	0.00196575	0	0.00149047	0	0	0.0022406	0.0113181	0	0.0102183	0.0125378	0.00528066
146	Calmodulin-like protein 5 OS=Homo sapiens GN=CALML5 PE=1 SV=2	CALL5_HUMAN		16	4.05	Homo sapiens	0.00462069	0	0.00292017	0	0	0	0	0	0	0	0	0	0	0	0
147	Calreticulin OS=Homo sapiens GN=CALR PE=1 SV=1	CALR_HUMAN		48	4.04	Homo sapiens	0	0	0	0	0	0	0	0	0	0	0.00131489	0	0.000293126	0	0
191	Carboxypeptidase N catalytic chain OS=Homo sapiens GN=CPN1 PE=1 SV=1	CBPN_HUMAN		52	7.36	Homo sapiens	0	0	0	0	0	0	0	0	0	0	0.000550679	0	0	0	0
198	Cartilage acidic protein 1 OS=Homo sapiens GN=CRTAC1 PE=1 SV=2	CRAC1_HUMAN		71	4.73	Homo sapiens	0	0	0	0	0	0	0	0	0	0	0	0	0.00020176	0	0
37	Cartilage oligomeric matrix protein OS=Homo sapiens GN=COMP PE=1 SV=2	COMP_HUMAN		83	4.16	Homo sapiens	0	0	0	0	0	0	0	0	0	0	0.0105241	0	0.00847904	0.00642306	0.0049473
35	Ceruloplasmin OS=Homo sapiens GN=CP PE=1 SV=1	CERU_HUMAN		122	5.5	Homo sapiens	0	0	0	0.000708562	0	0	0	0	0.00371412	0	0.00624285	0	0.00418029	0.00415736	0.00397192
184	Collectin-10 OS=Homo sapiens GN=COLEC10 PE=2 SV=2	COL10_HUMAN		31	7.39	Homo sapiens	0	0	0	0	0	0	0	0	0	0	0	0	0.000462096	0	0
173	Collectin-11 OS=Homo sapiens GN=COLEC11 PE=1 SV=1	COL11_HUMAN		29	5.06	Homo sapiens	0	0	0	0	0	0	0	0	0	0	0.000470113	0	0.000493965	0	0.00113455
180	Complement factor I OS=Homo sapiens GN=CFI PE=1 SV=2	CFAI_HUMAN		66	7.53	Homo sapiens	0	0	0	0	0	0	0	0	0	0	0.0010683	0	0	0	0
92	Dermcidin OS=Homo sapiens GN=DCD PE=1 SV=2	DCD_HUMAN		11	6.52	Homo sapiens	0.00338945	0	0.0250958	0.0106432	0	0.00579489	0.00460315	0.0123178	0.00459075	0.00570335	0.0038426	0	0	0.00827131	0.0029911
163	Desmocollin-1 OS=Homo sapiens GN=DSC1 PE=1 SV=2	DSC1_HUMAN		100	5.08	Homo sapiens	0.000372839	0.000840454	0	0	0	0	0.000178029	0	0	0	0	0	0	0	0
171	Desmoglein-1 OS=Homo sapiens GN=DSG1 PE=1 SV=2	DSG1_HUMAN		114	4.66	Homo sapiens	0	0	0	0	0	0	0	0.0015288	0	0	0	0	0	0	0
132	Desmoplakin OS=Homo sapiens GN=DSP PE=1 SV=3	DESP_HUMAN		332	6.78	Homo sapiens	0	0	0.000135654	0	0	0	0	0.000816761	0	0	0	0	0	0	0
151	Elongation factor 1-alpha 1 OS=Homo sapiens GN=EEF1A1 PE=1 SV=1	EF1A1_HUMAN		50	9.5	Homo sapiens	0.00333645	0	0	0	0.00415108	0	0	0	0	0	0	0	0	0	0
189	Endoplasmin OS=Homo sapiens GN=HSP90B1 PE=1 SV=1	ENPL_HUMAN		92	4.48	Homo sapiens	0	0	0	0	0	0	0	0	0	0	0	0	0.000299492	0	0
172	Erythrocyte band 7 integral membrane protein OS=Homo sapiens GN=STOM PE=1 SV=3	STOM_HUMAN		32	8.07	Homo sapiens	0	0	0	0	0	0	0.000556341	0	0.00128634	0.000641345	0	0	0	0	0
152	Extracellular superoxide dismutase [Cu-Zn] OS=Homo sapiens GN=SOD3 PE=1 SV=2	SODE_HUMAN		26	6.59	Homo sapiens	0	0	0	0	0	0	0	0	0	0	0	0	0.00264935	0	0.00157879
38	Fibronectin OS=Homo sapiens GN=FN1 PE=1 SV=4	FINC_HUMAN		263	5.45	Homo sapiens	0	0	0	0	0	0	0.000151487	0	0.00150402	0.000198232	0.00264772	0	0.00143183	0.00118696	0.0012803
108	Ficolin-2 OS=Homo sapiens GN=FCN2 PE=1 SV=2	FCN2_HUMAN		34	6.77	Homo sapiens	0	0	0.00672124	0	0	0	0.00245301	0	0.000515265	0.0018452	0	0	0.000835148	0	0
49	Ficolin-3 OS=Homo sapiens GN=FCN3 PE=1 SV=2	FCN3_HUMAN		33	6.66	Homo sapiens	0.00109158	0.00889602	0.00343639	0	0.022499	0	0.00376332	0	0	0.00856018	0.00233443	0	0.00992637	0.00236684	0.0121927
123	Filaggrin OS=Homo sapiens GN=FLG PE=1 SV=3	FILA_HUMAN		435	9.6	Homo sapiens	0	0	0.000368101	0	0	0	0.000340358	0	0	9.62608e-05	0	0	0	0	0
125	Filaggrin-2 OS=Homo sapiens GN=FLG2 PE=1 SV=1	FILA2_HUMAN		248	8.35	Homo sapiens	0	0.000338893	0.000833919	0	0	0	0.000340028	0.000468502	0	0	0	0	0	0	0
91	Filamin-A OS=Homo sapiens GN=FLNA PE=1 SV=4	FLNA_HUMAN		281	5.95	Homo sapiens	0	0	0	0	0.00219242	0	0.000119978	0	0.000478831	0	0	0	0	0.00018507	8.78237e-05
79	Galectin-3-binding protein OS=Homo sapiens GN=LGALS3BP PE=1 SV=1	LG3BP_HUMAN		65	4.9	Homo sapiens	0.00144842	0.00132318	0.00246344	0	0.00810645	0	0.00139128	0.000591929	0	0.0020946	0.000221937	0	0.00107014	0	0.00139014
192	Glutathione peroxidase 3 OS=Homo sapiens GN=GPX3 PE=1 SV=2	GPX3_HUMAN		26	8.29	Homo sapiens	0	0	0	0	0	0	0	0	0	0	0.000524357	0	0	0	0
193	Glyceraldehyde-3-phosphate dehydrogenase OS=Homo sapiens GN=GAPDH PE=1 SV=3	G3P_HUMAN		36	8.73	Homo sapiens	0.0026152	0	0	0	0	0	0	0	0	0	0	0	0	0	0
196	GTP-binding nuclear protein Ran OS=Homo sapiens GN=RAN PE=1 SV=3	RAN_HUMAN		24	7.59	Homo sapiens	0.0015535	0	0	0	0	0	0	0	0	0	0	0	0	0	0
138	Heat shock 70 kDa protein 1-like OS=Homo sapiens GN=HSPA1L PE=1 SV=2	HS71L_HUMAN		70	5.82	Homo sapiens	0.00346182	0	0	0	0.00171151	0	0.000482235	0	0	0	0	0	0	0.000742926	0
89	Hemopexin OS=Homo sapiens GN=HPX PE=1 SV=2	HEMO_HUMAN		52	7.02	Homo sapiens	0	0	0	0.00559176	0	0	0.000765765	0	0.00680657	0	0.000535436	0	0.000672513	0	0
68	Heparin cofactor 2 OS=Homo sapiens GN=SERPIND1 PE=1 SV=3	HEP2_HUMAN		57	6.89	Homo sapiens	0	0	0	0	0	0	0	0	0.00190962	0	0.00518772	0	0.00208808	0.00228169	0.00331556
32	Hornerin OS=Homo sapiens GN=HRNR PE=1 SV=2	HORN_HUMAN		282	10.24	Homo sapiens	0.00393488	0.00217847	0.00251811	0.00289752	0	0.00086021	0.00291598	0.00267503	0.000595689	0.000963868	0	0	0	9.19953e-05	0.000116391
24	Hyaluronan-binding protein 2 OS=Homo sapiens GN=HABP2 PE=1 SV=1	HABP2_HUMAN		63	6.52	Homo sapiens	0.00090259	0	0	0	0	0	0	0	0	0	0.0175575	0	0.0150856	0.0208461	0.0170736
26	Inter-alpha-trypsin inhibitor heavy chain H1 OS=Homo sapiens GN=ITIH1 PE=1 SV=3	ITIH1_HUMAN		101	6.78	Homo sapiens	0	0	0	0	0	0	0	0	0.000836702	0	0.0154749	0	0.0073938	0.00566344	0.0064238
21	Inter-alpha-trypsin inhibitor heavy chain H2 OS=Homo sapiens GN=ITIH2 PE=1 SV=2	ITIH2_HUMAN		106	6.85	Homo sapiens	0.00035763	0	0	0	0	0	0	0	0.00165768	0	0.0199782	0	0.00764006	0.00760452	0.00898774
46	Inter-alpha-trypsin inhibitor heavy chain H3 OS=Homo sapiens GN=ITIH3 PE=1 SV=2	ITIH3_HUMAN		100	5.49	Homo sapiens	0	0	0	0	0	0	0	0	0	0	0.00479272	0	0.00363039	0.00572127	0.00476308
105	Inter-alpha-trypsin inhibitor heavy chain H4 OS=Homo sapiens GN=ITIH4 PE=1 SV=4	ITIH4_HUMAN		103	6.97	Homo sapiens	0	0	0	0	0	0	0	0.000373547	0.00131073	0	0.00102419	0	0.000750566	0.000883344	0
182	Junction plakoglobin OS=Homo sapiens GN=JUP PE=1 SV=3	PLAK_HUMAN		82	6.05	Homo sapiens	0	0.00154299	0	0	0	0	0	0.000470898	0	0	0	0	0	0	0
127	Lumican OS=Homo sapiens GN=LUM PE=1 SV=2	LUM_HUMAN		38	6.6	Homo sapiens	0	0	0	0	0	0	0	0	0	0	0.00314718	0	0.00237381	0.000685846	0.00129663
134	Lysozyme C OS=Homo sapiens GN=LYZ PE=1 SV=1	LYSC_HUMAN		17	9.35	Homo sapiens	0.0044231	0.00256042	0	0	0	0.0039014	0.00187437	0	0	0	0	0	0	0	0
107	Mannan-binding lectin serine protease 1 OS=Homo sapiens GN=MASP1 PE=1 SV=3	MASP1_HUMAN		79	5.18	Homo sapiens	0	0	0	0	0	0	0	0	0	0	0.000975141	0	0.00326596	0	0
161	Mannan-binding lectin serine protease 2 OS=Homo sapiens GN=MASP2 PE=1 SV=4	MASP2_HUMAN		76	5.37	Homo sapiens	0	0	0	0	0	0	0	0	0	0	0.000651073	0	0.00091525	0	0.000216478
170	Mannose-binding protein C OS=Homo sapiens GN=MBL2 PE=1 SV=2	MBL2_HUMAN		26	5.14	Homo sapiens	0	0	0	0	0	0	0	0	0	0	0.0016188	0	0	0	0.0015772
194	Myosin-9 OS=Homo sapiens GN=MYH9 PE=1 SV=4	MYH9_HUMAN		227	5.29	Homo sapiens	0	0	0	0	0	0	0	0	0	0	0	0	0	0.000114811	0
150	Neutrophil defensin 1 OS=Homo sapiens GN=DEFA1 PE=1 SV=1	DEF1_HUMAN		10	7.04	Homo sapiens	0	0	0	0	0	0.00307079	0.00337564	0	0	0.00422138	0	0	0	0	0
102	Phosphatidylcholine-sterol acyltransferase OS=Homo sapiens GN=LCAT PE=1 SV=1	LCAT_HUMAN		50	6.04	Homo sapiens	0	0	0	0	0	0	0	0	0	0	0.00184076	0	0.00280761	0.00363884	0.00180638
128	Phosphatidylinositol-glycan-specific phospholipase D OS=Homo sapiens GN=GPLD1 PE=1 SV=3	PHLD_HUMAN		92	6.33	Homo sapiens	0	0	0	0	0	0	0	0	0	0	0.000686031	0	0.00150896	0.000847968	0
149	Phospholipid transfer protein OS=Homo sapiens GN=PLTP PE=1 SV=1	PLTP_HUMAN		55	7.01	Homo sapiens	0	0	0	0	0	0	0	0	0	0	0	0	0.00190356	0.000472877	0
175	Pigment epithelium-derived factor OS=Homo sapiens GN=SERPINF1 PE=1 SV=4	PEDF_HUMAN		46	6.33	Homo sapiens	0	0	0	0	0	0	0	0	0.000361122	0	0.00123014	0	0	0	0.000355869
183	Plasma kallikrein OS=Homo sapiens GN=KLKB1 PE=1 SV=1	KLKB1_HUMAN		71	8.26	Homo sapiens	0	0	0	0	0	0	0	0	0.000233967	0	0	0	0	0	0.000231687
168	Plasma protease C1 inhibitor OS=Homo sapiens GN=SERPING1 PE=1 SV=2	IC1_HUMAN		55	6.52	Homo sapiens	0	0	0	0	0	0	0	0	0.00107298	0	0	0	0	0	0.000299133
157	Polymeric immunoglobulin receptor OS=Homo sapiens GN=PIGR PE=1 SV=4	PIGR_HUMAN		83	5.43	Homo sapiens	0	0	0	0	0.00172036	0	0	0	0	0.000884483	0	0	0	0	0.000197228
59	Properdin OS=Homo sapiens GN=CFP PE=1 SV=2	PROP_HUMAN		51	7.92	Homo sapiens	0.00617652	0.00496177	0.0080865	0	0.0118198	0	0.00304091	0.00227821	0.00115063	0.00510552	0	0	0.000697206	0.000509966	0.00112903
143	Protein S100-A7 OS=Homo sapiens GN=S100A7 PE=1 SV=4	S10A7_HUMAN		11	6.78	Homo sapiens	0	0	0	0.0104599	0	0	0.00289676	0	0.00223194	0	0	0	0	0	0
133	Protein S100-A8 OS=Homo sapiens GN=S100A8 PE=1 SV=1	S10A8_HUMAN		11	7.07	Homo sapiens	0	0	0.00614141	0.0237226	0	0.00719071	0	0	0	0	0	0	0	0	0
113	Protein S100-A9 OS=Homo sapiens GN=S100A9 PE=1 SV=1	S10A9_HUMAN		13	6.07	Homo sapiens	0	0	0	0.0157329	0	0	0.00504611	0	0.00125905	0.00398601	0	0	0	0	0
101	Protein Z-dependent protease inhibitor OS=Homo sapiens GN=SERPINA10 PE=1 SV=1	ZPI_HUMAN		51	8.58	Homo sapiens	0	0	0	0	0	0	0	0	0	0	0.00110953	0	0.00232549	0.0022945	0.0035419
158	Resistin OS=Homo sapiens GN=RETN PE=2 SV=1	RETN_HUMAN		11	6.89	Homo sapiens	0	0	0	0	0	0.00579489	0.00161845	0	0.00536488	0.00189668	0	0	0	0	0
155	Retinol-binding protein 4 OS=Homo sapiens GN=RBP4 PE=1 SV=3	RET4_HUMAN		23	5.85	Homo sapiens	0	0	0	0	0	0	0	0	0.00365449	0	0.000926699	0	0	0	0
109	Secreted phosphoprotein 24 OS=Homo sapiens GN=SPP2 PE=1 SV=1	SPP24_HUMAN		24	8.46	Homo sapiens	0	0	0	0	0	0	0	0	0	0	0.00352238	0	0.00465545	0.0075834	0.00615734
137	Small proline-rich protein 2A OS=Homo sapiens GN=SPRR2A PE=1 SV=1	SPR2A_HUMAN		8	8.49	Homo sapiens	0.0139019	0	0.00562963	0.0143824	0	0	0.00298328	0	0	0.00384807	0	0	0	0	0
199	Sodium-dependent phosphate transporter 2 OS=Homo sapiens GN=SLC20A2 PE=1 SV=1	S20A2_HUMAN		70	6.09	Homo sapiens	0	0	0	0	0.000786301	0	0	0	0	0	0	0	0	0	0
185	Suprabasin OS=Homo sapiens GN=SBSN PE=1 SV=2	SBSN_HUMAN		61	7.01	Homo sapiens	0	0	0	0	0	0	0.000291851	0	0	0	0	0	0	0	0
195	Tetranectin OS=Homo sapiens GN=CLEC3B PE=1 SV=3	TETN_HUMAN		23	5.36	Homo sapiens	0	0	0	0	0	0	0	0	0	0	0.000926699	0	0	0	0
90	Transthyretin OS=Homo sapiens GN=TTR PE=1 SV=1	TTHY_HUMAN		16	5.58	Homo sapiens	0	0	0	0	0	0	0	0	0.00211791	0	0.00925302	0	0.00870525	0.0154382	0.00667828
114	Tropomyosin alpha-4 chain OS=Homo sapiens GN=TPM4 PE=1 SV=3	TPM4_HUMAN		29	4.36	Homo sapiens	0	0	0	0	0	0	0	0	0	0	0	0	0.00505867	0.00672413	0.00254855
148	Trypsin-1 OS=Homo sapiens GN=PRSS1 PE=1 SV=1	TRY1_HUMAN		27	6.49	Homo sapiens	0	0	0	0	0	0.00355533	0	0	0.00187031	0	0	0	0	0	0
165	Ubiquitin-60S ribosomal protein L40 OS=Homo sapiens GN=UBA52 PE=1 SV=2	RL40_HUMAN		15	10.51	Homo sapiens	0.00741433	0	0	0	0	0	0	0	0	0	0	0	0	0	0
178	Zinc-alpha-2-glycoprotein OS=Homo sapiens GN=AZGP1 PE=1 SV=2	ZA2G_HUMAN		34	5.92	Homo sapiens	0	0	0	0	0	0	0	0	0.00298383	0	0	0	0	0	0
[truncated: 88 more columns]

## Sheet: Sample Report for Pancreas
Pnacreas tumor						CHOL
						Spectral counts															Percent coverage															Unique peptide
#	Identified Proteins (195)	Accession Number	Molecular Weight	pI	Taxonomy	2016-11-16_CHOLPC_pancreas_A_01	2016-11-16_CHOLPC_pancreas_A_02	2016-11-16_CHOLPC_pancreas_A_03	2016-11-16_CHOLPC_pancreas_B_01	2016-11-16_CHOLPC_pancreas_B_02	2016-11-16_CHOLPC_pancreas_B_03	2016-11-16_DOTAP_DOPE_pancreas_C_01	2016-11-16_DOTAP_DOPE_pancreas_C_02	2016-11-16_DOTAP_DOPE_pancreas_C_03	2016-11-16_CHOLPC_pancreas_D_01	2016-11-16_CHOLPC_pancreas_D_02	2016-11-16_CHOLPC_pancreas_D_03	2016-11-16_CHOLPC_pancreas_E_01	2016-11-16_CHOLPC_pancreas_E_02	2016-11-16_CHOLPC_pancreas_E_03	2016-11-16_CHOLPC_pancreas_A_01	2016-11-16_CHOLPC_pancreas_A_02	2016-11-16_CHOLPC_pancreas_A_03	2016-11-16_CHOLPC_pancreas_B_01	2016-11-16_CHOLPC_pancreas_B_02	2016-11-16_CHOLPC_pancreas_B_03	2016-11-16_DOTAP_DOPE_pancreas_C_01	2016-11-16_DOTAP_DOPE_pancreas_C_02	2016-11-16_DOTAP_DOPE_pancreas_C_03	2016-11-16_CHOLPC_pancreas_D_01	2016-11-16_CHOLPC_pancreas_D_02	2016-11-16_CHOLPC_pancreas_D_03	2016-11-16_CHOLPC_pancreas_E_01	2016-11-16_CHOLPC_pancreas_E_02	2016-11-16_CHOLPC_pancreas_E_03	2016-11-16_CHOLPC_pancreas_A_01	2016-11-16_CHOLPC_pancreas_A_02	2016-11-16_CHOLPC_pancreas_A_03	2016-11-16_CHOLPC_pancreas_B_01	2016-11-16_CHOLPC_pancreas_B_02	2016-11-16_CHOLPC_pancreas_B_03	2016-11-16_DOTAP_DOPE_pancreas_C_01	2016-11-16_DOTAP_DOPE_pancreas_C_02	2016-11-16_DOTAP_DOPE_pancreas_C_03	2016-11-16_CHOLPC_pancreas_D_01	2016-11-16_CHOLPC_pancreas_D_02	2016-11-16_CHOLPC_pancreas_D_03	2016-11-16_CHOLPC_pancreas_E_01	2016-11-16_CHOLPC_pancreas_E_02
1	Apolipoprotein B-100 OS=Homo sapiens GN=APOB PE=1 SV=2	APOB_HUMAN	516	7.04	Homo sapiens	19	15	19	36	42	34	255	245	250	78	69	70	7	8	7	0.045	0.035	0.043	0.068	0.073	0.067	0.38	0.36	0.35	0.13	0.11	0.12	0.016	0.018	0.016	18	14	17	30	33	29	156	150	145	54	48	52	7	8
2	Vitronectin OS=Homo sapiens GN=VTN PE=1 SV=1	VTNC_HUMAN	54	5.54	Homo sapiens	12	0	0	0	0	0	198	230	235	0	0	0	0	0	0	0.088	0	0	0	0	0	0.33	0.31	0.32	0	0	0	0	0	0	3	0	0	0	0	0	15	14	14	0	0	0	0	0
3	Complement C3 OS=Homo sapiens GN=C3 PE=1 SV=2	CO3_HUMAN	187	6.34	Homo sapiens	17	13	14	19	22	19	189	188	195	29	25	28	17	18	18	0.068	0.054	0.072	0.081	0.097	0.079	0.52	0.51	0.53	0.13	0.11	0.12	0.059	0.065	0.064	14	11	12	15	17	14	78	75	78	23	18	21	13	13
4	Ig gamma-1 chain C region OS=Homo sapiens GN=IGHG1 PE=1 SV=1	IGHG1_HUMAN	36	8.31	Homo sapiens	20	22	21	26	24	25	43	50	41	37	43	42	19	16	20	0.42	0.38	0.32	0.48	0.53	0.53	0.4	0.44	0.4	0.47	0.53	0.43	0.33	0.3	0.3	11	11	8	11	12	12	11	12	11	12	13	11	11	9
5	Ig mu chain C region OS=Homo sapiens GN=IGHM PE=1 SV=3	IGHM_HUMAN	49	6.77	Homo sapiens	23	30	29	34	35	40	55	50	48	17	17	20	54	59	55	0.18	0.2	0.24	0.2	0.25	0.25	0.35	0.33	0.35	0.18	0.16	0.2	0.29	0.29	0.27	7	8	10	10	10	11	13	12	13	7	6	8	13	13
6	Serum albumin OS=Homo sapiens GN=ALB PE=1 SV=2	ALBU_HUMAN	69	6.21	Homo sapiens	15	19	18	15	17	18	76	76	79	14	17	15	12	11	15	0.18	0.24	0.2	0.21	0.24	0.25	0.57	0.56	0.56	0.23	0.24	0.22	0.13	0.19	0.13	11	15	12	12	14	14	36	33	36	12	12	12	8	10
7	C4b-binding protein alpha chain OS=Homo sapiens GN=C4BPA PE=1 SV=2	C4BPA_HUMAN	67	7.31	Homo sapiens	6	5	6	8	5	5	87	88	89	7	5	5	5	2	5	0.08	0.067	0.08	0.092	0.067	0.067	0.47	0.45	0.46	0.12	0.097	0.084	0.067	0.034	0.079	4	4	4	5	3	3	25	24	25	7	5	4	5	2
8	Keratin, type II cytoskeletal 1 OS=Homo sapiens GN=KRT1 PE=1 SV=6	K2C1_HUMAN	66	8.33	Homo sapiens	6	5	8	31	27	30	36	35	32	31	30	30	15	14	12	0.12	0.065	0.11	0.46	0.41	0.45	0.42	0.38	0.34	0.48	0.44	0.46	0.29	0.26	0.25	6	5	7	25	21	24	25	23	22	25	25	26	14	11
9	Complement C4-A OS=Homo sapiens GN=C4A PE=1 SV=2	CO4A_HUMAN	193	7.08	Homo sapiens	5	6	7	11	8	10	95	96	95	7	5	6	5	5	5	0.03	0.038	0.045	0.049	0.037	0.05	0.34	0.33	0.33	0.045	0.032	0.04	0.019	0.019	0.019	5	6	7	8	6	8	49	49	49	7	5	6	3	3
10	Prothrombin OS=Homo sapiens GN=F2 PE=1 SV=2	THRB_HUMAN	70	5.7	Homo sapiens	0	0	0	0	0	0	108	111	115	0	0	0	0	0	0	0	0	0	0	0	0	0.43	0.46	0.47	0	0	0	0	0	0	0	0	0	0	0	0	25	27	29	0	0	0	0	0
11	Keratin, type I cytoskeletal 9 OS=Homo sapiens GN=KRT9 PE=1 SV=3	K1C9_HUMAN	62	4.89	Homo sapiens	9	7	8	20	17	17	17	16	20	21	24	20	8	8	10	0.19	0.17	0.19	0.33	0.27	0.27	0.35	0.26	0.35	0.35	0.33	0.33	0.18	0.18	0.22	7	6	7	15	12	11	14	12	15	14	13	13	6	6
12	Apolipoprotein D OS=Homo sapiens GN=APOD PE=1 SV=1	APOD_HUMAN	21	4.79	Homo sapiens	8	9	6	14	17	10	48	42	42	20	16	21	0	0	2	0.21	0.21	0.21	0.25	0.29	0.25	0.41	0.41	0.41	0.31	0.31	0.35	0	0	0.15	4	5	4	5	6	5	9	9	9	6	6	7	0	0
13	Fibrinogen beta chain OS=Homo sapiens GN=FGB PE=1 SV=2	FIBB_HUMAN	56	8.38	Homo sapiens	0	0	0	5	5	6	64	65	72	13	16	13	0	0	0	0	0	0	0.1	0.096	0.12	0.51	0.48	0.48	0.13	0.18	0.18	0	0	0	0	0	0	4	4	5	23	22	24	7	9	8	0	0
14	Ig kappa chain C region OS=Homo sapiens GN=IGKC PE=1 SV=1	IGKC_HUMAN	12	5.68	Homo sapiens	10	11	11	18	20	15	17	16	20	12	11	9	14	11	6	0.51	0.71	0.42	0.75	0.91	0.75	0.49	0.49	0.56	0.5	0.5	0.37	0.5	0.56	0.39	4	6	4	8	9	7	4	3	5	4	4	3	4	6
15	Hyaluronan-binding protein 2 OS=Homo sapiens GN=HABP2 PE=1 SV=1	HABP2_HUMAN	63	6.52	Homo sapiens	0	0	0	0	0	0	53	49	61	0	0	0	0	0	0	0	0	0	0	0	0	0.38	0.37	0.37	0	0	0	0	0	0	0	0	0	0	0	0	19	18	20	0	0	0	0	0
16	Complement factor H OS=Homo sapiens GN=CFH PE=1 SV=4	CFAH_HUMAN	139	6.59	Homo sapiens	0	3	3	0	0	0	58	56	54	2	0	3	0	0	0	0	0.017	0.017	0	0	0	0.35	0.36	0.35	0.019	0	0.027	0	0	0	0	2	2	0	0	0	35	35	33	2	0	3	0	0
17	Keratin, type I cytoskeletal 10 OS=Homo sapiens GN=KRT10 PE=1 SV=6	K1C10_HUMAN	59	4.88	Homo sapiens	3	2	3	12	10	12	15	16	19	10	16	13	6	8	6	0.065	0.046	0.06	0.15	0.13	0.16	0.26	0.28	0.3	0.13	0.16	0.13	0.12	0.15	0.096	3	2	3	10	9	10	13	13	15	8	12	9	6	8
18	Inter-alpha-trypsin inhibitor heavy chain H2 OS=Homo sapiens GN=ITIH2 PE=1 SV=2	ITIH2_HUMAN	106	6.85	Homo sapiens	0	0	0	0	0	0	53	61	59	0	0	0	0	0	0	0	0	0	0	0	0	0.25	0.28	0.29	0	0	0	0	0	0	0	0	0	0	0	0	22	25	26	0	0	0	0	0
19	Inter-alpha-trypsin inhibitor heavy chain H1 OS=Homo sapiens GN=ITIH1 PE=1 SV=3	ITIH1_HUMAN	101	6.78	Homo sapiens	0	0	0	0	0	0	56	60	62	0	0	0	0	0	0	0	0	0	0	0	0	0.28	0.27	0.29	0	0	0	0	0	0	0	0	0	0	0	0	21	20	21	0	0	0	0	0
20	Haptoglobin OS=Homo sapiens GN=HP PE=1 SV=1	HPT_HUMAN	45	6.56	Homo sapiens	2	3	3	3	0	0	39	48	50	5	4	2	0	3	2	0.069	0.057	0.057	0.099	0	0	0.41	0.4	0.42	0.15	0.12	0.071	0	0.052	0.052	2	2	2	3	0	0	17	19	21	5	4	2	0	2
21	Ig lambda-2 chain C regions OS=Homo sapiens GN=IGLC2 PE=1 SV=1	LAC2_HUMAN	11	7.34	Homo sapiens	9	12	8	21	18	19	0	22	19	21	17	16	11	9	12	0.42	0.42	0.42	0.56	0.75	0.56	0	0.56	0.56	0.49	0.42	0.42	0.56	0.56	0.56	2	2	2	2	2	2	0	2	2	2	2	2	2	2
22	Fibrinogen gamma chain OS=Homo sapiens GN=FGG PE=1 SV=3	FIBG_HUMAN	52	5.32	Homo sapiens	0	0	0	3	3	3	28	33	33	4	5	6	0	0	2	0	0	0	0.075	0.046	0.064	0.4	0.4	0.35	0.093	0.093	0.11	0	0	0.04	0	0	0	3	2	3	16	15	16	4	4	5	0	0
23	Ig gamma-2 chain C region OS=Homo sapiens GN=IGHG2 PE=1 SV=2	IGHG2_HUMAN	36	7.66	Homo sapiens	0	0	0	18	15	18	21	27	28	27	27	30	11	11	13	0	0	0	0.32	0.26	0.3	0.2	0.24	0.36	0.19	0.21	0.23	0.22	0.26	0.22	0	0	0	6	5	4	2	3	5	3	3	4	3	5
24	Alpha-2-macroglobulin OS=Homo sapiens GN=A2M PE=1 SV=3	A2MG_HUMAN	163	6.43	Homo sapiens	4	3	0	2	0	0	40	43	41	0	0	0	0	0	0	0.033	0.022	0	0.015	0	0	0.21	0.24	0.22	0	0	0	0	0	0	4	3	0	2	0	0	26	28	26	0	0	0	0	0
25	Vitamin K-dependent protein S OS=Homo sapiens GN=PROS1 PE=1 SV=1	PROS_HUMAN	75	5.37	Homo sapiens	0	0	0	0	0	0	41	38	34	0	0	0	0	0	0	0	0	0	0	0	0	0.36	0.38	0.36	0	0	0	0	0	0	0	0	0	0	0	0	20	20	19	0	0	0	0	0
26	Apolipoprotein E OS=Homo sapiens GN=APOE PE=1 SV=1	APOE_HUMAN	36	5.42	Homo sapiens	0	0	0	0	0	0	29	33	29	0	2	0	0	0	0	0	0	0	0	0	0	0.43	0.64	0.57	0	0.079	0	0	0	0	0	0	0	0	0	0	14	19	18	0	2	0	0	0
27	Apolipoprotein A-I OS=Homo sapiens GN=APOA1 PE=1 SV=1	APOA1_HUMAN	31	5.5	Homo sapiens	0	3	0	0	0	0	31	35	35	0	2	2	0	0	0	0	0.12	0	0	0	0	0.55	0.59	0.69	0	0.09	0.09	0	0	0	0	3	0	0	0	0	19	22	24	0	2	2	0	0
28	Thrombospondin-1 OS=Homo sapiens GN=THBS1 PE=1 SV=2	TSP1_HUMAN	129	4.51	Homo sapiens	0	0	0	0	0	0	6	7	10	0	0	0	0	0	0	0	0	0	0	0	0	0.072	0.083	0.11	0	0	0	0	0	0	0	0	0	0	0	0	6	7	9	0	0	0	0	0
29	CD5 antigen-like OS=Homo sapiens GN=CD5L PE=1 SV=1	CD5L_HUMAN	38	5.15	Homo sapiens	3	3	4	6	8	7	14	13	16	2	3	2	5	6	4	0.066	0.066	0.089	0.22	0.24	0.25	0.36	0.35	0.37	0.066	0.066	0.066	0.14	0.19	0.14	2	2	3	5	6	6	9	8	9	2	2	2	4	6
30	Apolipoprotein C-III OS=Homo sapiens GN=APOC3 PE=1 SV=1	APOC3_HUMAN	11	5.04	Homo sapiens	0	0	0	0	0	0	27	22	29	0	0	0	0	0	0	0	0	0	0	0	0	0.48	0.56	0.48	0	0	0	0	0	0	0	0	0	0	0	0	3	4	4	0	0	0	0	0
31	Cartilage oligomeric matrix protein OS=Homo sapiens GN=COMP PE=1 SV=2	COMP_HUMAN	83	4.16	Homo sapiens	0	0	0	0	0	0	26	30	34	0	0	0	0	0	0	0	0	0	0	0	0	0.37	0.42	0.5	0	0	0	0	0	0	0	0	0	0	0	0	17	20	24	0	0	0	0	0
32	Ceruloplasmin OS=Homo sapiens GN=CP PE=1 SV=1	CERU_HUMAN	122	5.5	Homo sapiens	0	0	0	0	0	0	25	31	30	0	0	0	0	0	0	0	0	0	0	0	0	0.23	0.27	0.26	0	0	0	0	0	0	0	0	0	0	0	0	18	21	21	0	0	0	0	0
33	Serum paraoxonase/arylesterase 1 OS=Homo sapiens GN=PON1 PE=1 SV=3	PON1_HUMAN	40	4.89	Homo sapiens	0	0	0	0	0	0	31	31	32	0	0	0	0	0	0	0	0	0	0	0	0	0.44	0.55	0.46	0	0	0	0	0	0	0	0	0	0	0	0	9	11	10	0	0	0	0	0
34	Hornerin OS=Homo sapiens GN=HRNR PE=1 SV=2	HORN_HUMAN	282	10.24	Homo sapiens	0	0	0	16	15	17	0	0	0	8	12	11	0	0	2	0	0	0	0.074	0.073	0.087	0	0	0	0.036	0.061	0.054	0	0	0.014	0	0	0	13	13	15	0	0	0	6	10	9	0	0
35	Fibrinogen alpha chain OS=Homo sapiens GN=FGA PE=1 SV=2	FIBA_HUMAN	95	5.87	Homo sapiens	0	0	0	0	0	0	29	31	30	4	4	3	0	0	0	0	0	0	0	0	0	0.25	0.28	0.29	0.031	0.046	0.031	0	0	0	0	0	0	0	0	0	19	20	21	2	3	2	0	0
36	Clusterin OS=Homo sapiens GN=CLU PE=1 SV=1	CLUS_HUMAN	52	6.21	Homo sapiens	0	0	0	0	0	0	30	26	25	0	0	0	0	0	0	0	0	0	0	0	0	0.33	0.25	0.23	0	0	0	0	0	0	0	0	0	0	0	0	16	13	12	0	0	0	0	0
37	Kininogen-1 OS=Homo sapiens GN=KNG1 PE=1 SV=2	KNG1_HUMAN	72	6.8	Homo sapiens	0	0	0	0	0	0	36	31	30	0	0	0	0	0	0	0	0	0	0	0	0	0.28	0.3	0.27	0	0	0	0	0	0	0	0	0	0	0	0	17	18	17	0	0	0	0	0
38	Plasminogen OS=Homo sapiens GN=PLG PE=1 SV=2	PLMN_HUMAN	91	7.25	Homo sapiens	0	0	0	0	0	0	26	24	20	3	2	5	0	0	0	0	0	0	0	0	0	0.32	0.33	0.28	0.056	0.033	0.068	0	0	0	0	0	0	0	0	0	18	19	14	2	2	4	0	0
39	Keratin, type I cytoskeletal 14 OS=Homo sapiens GN=KRT14 PE=1 SV=4	K1C14_HUMAN	52	4.81	Homo sapiens	2	0	2	8	7	7	6	7	4	6	10	10	0	0	0	0.042	0	0.042	0.18	0.14	0.11	0.13	0.15	0.097	0.13	0.17	0.15	0	0	0	2	0	2	7	5	3	4	5	2	5	6	5	0	0
40	Keratin, type II cytoskeletal 2 epidermal OS=Homo sapiens GN=KRT2 PE=1 SV=2	K22E_HUMAN	65	8.17	Homo sapiens	0	0	0	15	12	15	9	8	12	13	11	14	0	0	0	0	0	0	0.22	0.2	0.21	0.17	0.15	0.23	0.22	0.2	0.23	0	0	0	0	0	0	9	8	7	6	5	8	9	7	9	0	0
41	Serotransferrin OS=Homo sapiens GN=TF PE=1 SV=3	TRFE_HUMAN	77	7.13	Homo sapiens	0	0	0	5	4	2	18	21	17	2	3	2	0	0	0	0	0	0	0.085	0.066	0.034	0.3	0.32	0.28	0.034	0.056	0.037	0	0	0	0	0	0	5	4	2	18	19	16	2	3	2	0	0
42	Keratin, type II cytoskeletal 6A OS=Homo sapiens GN=KRT6A PE=1 SV=3	K2C6A_HUMAN	60	8.16	Homo sapiens	0	0	0	7	7	5	4	0	0	4	7	5	3	4	4	0	0	0	0.13	0.12	0.076	0.053	0	0	0.076	0.13	0.094	0.055	0.055	0.073	0	0	0	6	5	3	2	0	0	3	6	4	2	2
43	Apolipoprotein(a) OS=Homo sapiens GN=LPA PE=1 SV=1	APOA_HUMAN	501	5.77	Homo sapiens	2	3	4	2	2	0	18	21	18	13	9	12	0	0	0	0.0057	0.0079	0.0048	0.0057	0.0057	0	0.039	0.046	0.034	0.028	0.012	0.028	0	0	0	2	3	2	2	2	0	14	16	12	11	5	11	0	0
44	Inter-alpha-trypsin inhibitor heavy chain H3 OS=Homo sapiens GN=ITIH3 PE=1 SV=2	ITIH3_HUMAN	100	5.49	Homo sapiens	0	0	0	0	0	0	28	27	30	0	0	0	0	0	0	0	0	0	0	0	0	0.15	0.15	0.17	0	0	0	0	0	0	0	0	0	0	0	0	11	11	13	0	0	0	0	0
45	Complement C5 OS=Homo sapiens GN=C5 PE=1 SV=4	CO5_HUMAN	188	6.49	Homo sapiens	0	0	0	0	0	0	24	23	25	0	0	0	0	0	0	0	0	0	0	0	0	0.13	0.12	0.13	0	0	0	0	0	0	0	0	0	0	0	0	20	19	20	0	0	0	0	0
46	Immunoglobulin lambda-like polypeptide 5 OS=Homo sapiens GN=IGLL5 PE=2 SV=2	IGLL5_HUMAN	23	9.05	Homo sapiens	2	4	3	6	6	7	14	8	11	7	5	4	4	3	5	0.12	0.19	0.12	0.14	0.28	0.19	0.27	0.27	0.27	0.15	0.12	0.12	0.19	0.18	0.21	2	4	3	3	4	4	4	4	4	4	3	2	4	3
47	Protein AMBP OS=Homo sapiens GN=AMBP PE=1 SV=1	AMBP_HUMAN	39	6.15	Homo sapiens	0	0	0	0	0	0	27	27	26	0	0	0	0	0	0	0	0	0	0	0	0	0.34	0.34	0.34	0	0	0	0	0	0	0	0	0	0	0	0	11	11	10	0	0	0	0	0
48	Fibronectin OS=Homo sapiens GN=FN1 PE=1 SV=4	FINC_HUMAN	263	5.45	Homo sapiens	0	0	0	0	0	0	28	28	23	0	0	0	0	0	0	0	0	0	0	0	0	0.13	0.12	0.11	0	0	0	0	0	0	0	0	0	0	0	0	22	21	19	0	0	0	0	0
49	Coagulation factor IX OS=Homo sapiens GN=F9 PE=1 SV=2	FA9_HUMAN	52	5.16	Homo sapiens	0	0	0	0	0	0	20	18	21	0	0	0	0	0	0	0	0	0	0	0	0	0.31	0.31	0.31	0	0	0	0	0	0	0	0	0	0	0	0	10	10	10	0	0	0	0	0
50	Apolipoprotein A-IV OS=Homo sapiens GN=APOA4 PE=1 SV=3	APOA4_HUMAN	45	5.05	Homo sapiens	0	0	0	0	0	0	20	17	15	0	0	0	0	0	0	0	0	0	0	0	0	0.39	0.42	0.36	0	0	0	0	0	0	0	0	0	0	0	0	14	14	12	0	0	0	0	0
51	Complement component C9 OS=Homo sapiens GN=C9 PE=1 SV=2	CO9_HUMAN	63	5.27	Homo sapiens	0	0	0	0	0	0	12	9	11	0	0	0	0	0	0	0	0	0	0	0	0	0.24	0.2	0.24	0	0	0	0	0	0	0	0	0	0	0	0	9	8	9	0	0	0	0	0
52	Complement C1s subcomponent OS=Homo sapiens GN=C1S PE=1 SV=1	C1S_HUMAN	77	4.59	Homo sapiens	0	0	0	0	0	0	19	18	18	0	0	0	0	0	0	0	0	0	0	0	0	0.22	0.22	0.24	0	0	0	0	0	0	0	0	0	0	0	0	13	13	13	0	0	0	0	0
53	Alpha-1-antitrypsin OS=Homo sapiens GN=SERPINA1 PE=1 SV=3	A1AT_HUMAN	47	5.31	Homo sapiens	0	0	0	0	0	0	19	23	18	0	0	0	0	0	0	0	0	0	0	0	0	0.28	0.36	0.34	0	0	0	0	0	0	0	0	0	0	0	0	9	13	11	0	0	0	0	0
54	Keratin, type II cytoskeletal 5 OS=Homo sapiens GN=KRT5 PE=1 SV=3	K2C5_HUMAN	62	7.91	Homo sapiens	0	0	0	9	8	9	7	0	5	6	7	6	0	0	0	0	0	0	0.14	0.12	0.14	0.095	0	0.059	0.1	0.1	0.1	0	0	0	0	0	0	6	5	6	4	0	2	4	4	4	0	0
55	Alpha-1-antichymotrypsin OS=Homo sapiens GN=SERPINA3 PE=1 SV=2	AACT_HUMAN	48	5.19	Homo sapiens	0	0	0	0	0	0	19	15	20	0	0	0	0	0	0	0	0	0	0	0	0	0.29	0.32	0.36	0	0	0	0	0	0	0	0	0	0	0	0	11	11	13	0	0	0	0	0
56	Ig alpha-1 chain C region OS=Homo sapiens GN=IGHA1 PE=1 SV=2	IGHA1_HUMAN	38	6.49	Homo sapiens	0	0	2	5	5	3	12	9	10	0	0	3	2	2	0	0	0	0.054	0.16	0.16	0.11	0.22	0.16	0.18	0	0	0.096	0.048	0.048	0	0	0	2	5	5	3	7	5	6	0	0	3	2	2
57	Coagulation factor X OS=Homo sapiens GN=F10 PE=1 SV=2	FA10_HUMAN	55	5.74	Homo sapiens	0	0	0	0	0	0	15	14	16	0	0	0	0	0	0	0	0	0	0	0	0	0.22	0.21	0.23	0	0	0	0	0	0	0	0	0	0	0	0	9	9	10	0	0	0	0	0
58	Ig gamma-3 chain C region OS=Homo sapiens GN=IGHG3 PE=1 SV=2	IGHG3_HUMAN	41	7.95	Homo sapiens	0	0	16	0	0	0	34	33	31	0	0	30	0	0	0	0	0	0.24	0	0	0	0.37	0.37	0.32	0	0	0.27	0	0	0	0	0	2	0	0	0	3	3	3	0	0	2	0	0
59	C-reactive protein OS=Homo sapiens GN=CRP PE=1 SV=1	CRP_HUMAN	25	5.32	Homo sapiens	0	0	0	0	0	0	5	4	4	0	0	0	0	0	0	0	0	0	0	0	0	0.16	0.17	0.16	0	0	0	0	0	0	0	0	0	0	0	0	4	4	4	0	0	0	0	0
60	Histidine-rich glycoprotein OS=Homo sapiens GN=HRG PE=1 SV=1	HRG_HUMAN	60	7.52	Homo sapiens	0	0	0	0	0	0	15	14	17	0	0	0	0	0	0	0	0	0	0	0	0	0.26	0.26	0.26	0	0	0	0	0	0	0	0	0	0	0	0	11	11	11	0	0	0	0	0
61	Complement C1q subcomponent subunit C OS=Homo sapiens GN=C1QC PE=1 SV=3	C1QC_HUMAN	26	8.58	Homo sapiens	0	0	0	2	0	2	6	7	6	0	3	2	2	0	3	0	0	0	0.12	0	0.12	0.25	0.25	0.2	0	0.12	0.12	0.12	0	0.12	0	0	0	2	0	2	5	5	4	0	2	2	2	0
62	Heparin cofactor 2 OS=Homo sapiens GN=SERPIND1 PE=1 SV=3	HEP2_HUMAN	57	6.89	Homo sapiens	0	0	0	0	0	0	11	15	11	0	0	0	0	0	0	0	0	0	0	0	0	0.17	0.2	0.19	0	0	0	0	0	0	0	0	0	0	0	0	8	10	9	0	0	0	0	0
63	Immunoglobulin J chain OS=Homo sapiens GN=IGJ PE=1 SV=4	IGJ_HUMAN	18	4.87	Homo sapiens	0	0	0	2	2	0	6	7	6	0	0	0	4	4	5	0	0	0	0.12	0.12	0	0.28	0.28	0.28	0	0	0	0.12	0.12	0.12	0	0	0	2	2	0	5	5	5	0	0	0	2	2
64	C4b-binding protein beta chain OS=Homo sapiens GN=C4BPB PE=1 SV=1	C4BPB_HUMAN	28	4.8	Homo sapiens	0	0	0	0	0	0	12	11	11	0	0	0	0	0	0	0	0	0	0	0	0	0.29	0.29	0.32	0	0	0	0	0	0	0	0	0	0	0	0	6	6	7	0	0	0	0	0
65	Vitamin K-dependent protein C OS=Homo sapiens GN=PROC PE=1 SV=1	PROC_HUMAN	52	6.23	Homo sapiens	0	0	0	0	0	0	10	10	10	0	0	0	0	0	0	0	0	0	0	0	0	0.14	0.14	0.13	0	0	0	0	0	0	0	0	0	0	0	0	5	5	6	0	0	0	0	0
66	Apolipoprotein C-II OS=Homo sapiens GN=APOC2 PE=1 SV=1	APOC2_HUMAN	11	4.36	Homo sapiens	0	0	0	0	0	0	8	11	10	0	0	0	0	0	0	0	0	0	0	0	0	0.43	0.54	0.29	0	0	0	0	0	0	0	0	0	0	0	0	4	5	3	0	0	0	0	0
67	Beta-2-glycoprotein 1 OS=Homo sapiens GN=APOH PE=1 SV=3	APOH_HUMAN	38	8.03	Homo sapiens	0	0	0	0	0	0	0	0	0	0	0	0	0	0	0	0	0	0	0	0	0	0	0	0	0	0	0	0	0	0	0	0	0	0	0	0	0	0	0	0	0	0	0	0
68	Vitamin K-dependent protein Z OS=Homo sapiens GN=PROZ PE=1 SV=2	PROZ_HUMAN	45	5.87	Homo sapiens	0	0	0	0	0	0	14	13	16	0	0	0	0	0	0	0	0	0	0	0	0	0.29	0.29	0.31	0	0	0	0	0	0	0	0	0	0	0	0	8	8	9	0	0	0	0	0
69	Apolipoprotein M OS=Homo sapiens GN=APOM PE=1 SV=2	APOM_HUMAN	21	5.92	Homo sapiens	0	0	0	0	0	0	12	10	8	0	0	0	0	0	0	0	0	0	0	0	0	0.21	0.24	0.23	0	0	0	0	0	0	0	0	0	0	0	0	6	6	5	0	0	0	0	0
70	Keratin, type I cytoskeletal 16 OS=Homo sapiens GN=KRT16 PE=1 SV=4	K1C16_HUMAN	51	4.69	Homo sapiens	0	0	0	8	0	0	0	0	0	0	0	0	0	0	0	0	0	0	0.18	0	0	0	0	0	0	0	0	0	0	0	0	0	0	2	0	0	0	0	0	0	0	0	0	0
71	Alpha-2-HS-glycoprotein OS=Homo sapiens GN=AHSG PE=1 SV=1	FETUA_HUMAN	39	5.52	Homo sapiens	0	0	0	0	0	0	14	13	13	0	0	0	0	0	0	0	0	0	0	0	0	0.26	0.26	0.24	0	0	0	0	0	0	0	0	0	0	0	0	7	8	7	0	0	0	0	0
72	Alpha-1-acid glycoprotein 1 OS=Homo sapiens GN=ORM1 PE=1 SV=1	A1AG1_HUMAN	24	4.66	Homo sapiens	0	0	0	0	0	0	10	9	8	0	0	0	0	0	0	0	0	0	0	0	0	0.29	0.29	0.33	0	0	0	0	0	0	0	0	0	0	0	0	6	6	7	0	0	0	0	0
73	Serum amyloid A-2 protein OS=Homo sapiens GN=SAA2 PE=1 SV=1	SAA2_HUMAN	14	9.48	Homo sapiens	0	0	0	0	0	0	10	9	10	0	0	0	0	0	0	0	0	0	0	0	0	0.36	0.36	0.36	0	0	0	0	0	0	0	0	0	0	0	0	4	4	4	0	0	0	0	0
74	Transthyretin OS=Homo sapiens GN=TTR PE=1 SV=1	TTHY_HUMAN	16	5.58	Homo sapiens	0	0	0	0	0	0	7	8	9	0	0	0	0	0	0	0	0	0	0	0	0	0.29	0.29	0.29	0	0	0	0	0	0	0	0	0	0	0	0	4	4	4	0	0	0	0	0
75	Complement C1r subcomponent OS=Homo sapiens GN=C1R PE=1 SV=2	C1R_HUMAN	80	6.14	Homo sapiens	0	0	0	0	0	0	7	7	8	0	0	0	0	0	0	0	0	0	0	0	0	0.12	0.13	0.14	0	0	0	0	0	0	0	0	0	0	0	0	6	6	7	0	0	0	0	0
76	Properdin OS=Homo sapiens GN=CFP PE=1 SV=2	PROP_HUMAN	51	7.92	Homo sapiens	0	0	0	7	5	4	3	0	0	0	3	0	0	0	0	0	0	0	0.094	0.094	0.098	0.051	0	0	0	0.098	0	0	0	0	0	0	0	4	4	4	2	0	0	0	3	0	0	0
77	Protein Z-dependent protease inhibitor OS=Homo sapiens GN=SERPINA10 PE=1 SV=1	ZPI_HUMAN	51	8.58	Homo sapiens	0	0	0	0	0	0	9	6	6	0	0	0	0	0	0	0	0	0	0	0	0	0.22	0.18	0.19	0	0	0	0	0	0	0	0	0	0	0	0	7	6	6	0	0	0	0	0
78	Coagulation factor V OS=Homo sapiens GN=F5 PE=1 SV=4	FA5_HUMAN	252	5.95	Homo sapiens	0	0	0	0	0	0	5	4	9	0	0	0	0	0	0	0	0	0	0	0	0	0.028	0.021	0.039	0	0	0	0	0	0	0	0	0	0	0	0	5	4	7	0	0	0	0	0
79	Phosphatidylcholine-sterol acyltransferase OS=Homo sapiens GN=LCAT PE=1 SV=1	LCAT_HUMAN	50	6.04	Homo sapiens	0	0	0	0	0	0	5	3	4	0	0	0	0	0	0	0	0	0	0	0	0	0.15	0.095	0.084	0	0	0	0	0	0	0	0	0	0	0	0	4	2	3	0	0	0	0	0
80	Thrombospondin-4 OS=Homo sapiens GN=THBS4 PE=1 SV=2	TSP4_HUMAN	106	4.23	Homo sapiens	0	0	0	0	0	0	8	11	10	0	0	0	0	0	0	0	0	0	0	0	0	0.1	0.12	0.11	0	0	0	0	0	0	0	0	0	0	0	0	5	7	6	0	0	0	0	0
81	Complement component C6 OS=Homo sapiens GN=C6 PE=1 SV=3	CO6_HUMAN	105	6.74	Homo sapiens	0	0	0	0	0	0	8	8	8	0	0	0	0	0	0	0	0	0	0	0	0	0.1	0.1	0.095	0	0	0	0	0	0	0	0	0	0	0	0	7	7	7	0	0	0	0	0
82	Ficolin-3 OS=Homo sapiens GN=FCN3 PE=1 SV=2	FCN3_HUMAN	33	6.66	Homo sapiens	0	0	0	0	0	0	7	9	7	0	0	0	0	2	2	0	0	0	0	0	0	0.21	0.26	0.21	0	0	0	0	0.064	0.064	0	0	0	0	0	0	5	6	5	0	0	0	0	2
83	Complement component C8 alpha chain OS=Homo sapiens GN=C8A PE=1 SV=2	CO8A_HUMAN	65	6.41	Homo sapiens	0	0	0	0	0	0	3	5	4	0	0	0	0	0	0	0	0	0	0	0	0	0.074	0.14	0.11	0	0	0	0	0	0	0	0	0	0	0	0	3	5	4	0	0	0	0	0
84	Hemoglobin subunit beta OS=Homo sapiens GN=HBB PE=1 SV=2	HBB_HUMAN	16	7.32	Homo sapiens	0	0	0	0	0	0	2	5	2	0	2	2	0	0	0	0	0	0	0	0	0	0.22	0.35	0.16	0	0.14	0.14	0	0	0	0	0	0	0	0	0	2	4	2	0	2	2	0	0
85	Keratin, type I cytoskeletal 17 OS=Homo sapiens GN=KRT17 PE=1 SV=2	K1C17_HUMAN	48	4.67	Homo sapiens	0	0	0	0	0	6	0	0	0	0	0	0	0	0	0	0	0	0	0	0	0.1	0	0	0	0	0	0	0	0	0	0	0	0	0	0	2	0	0	0	0	0	0	0	0
86	Ig kappa chain V-III region HIC OS=Homo sapiens PE=1 SV=2	KV313_HUMAN	14	4.85	Homo sapiens	0	0	0	0	0	0	5	6	0	0	0	0	0	2	2	0	0	0	0	0	0	0.26	0.26	0	0	0	0	0	0.26	0.21	0	0	0	0	0	0	2	2	0	0	0	0	0	2
87	Retinol-binding protein 4 OS=Homo sapiens GN=RBP4 PE=1 SV=3	RET4_HUMAN	23	5.85	Homo sapiens	0	0	0	0	0	0	8	9	9	0	0	0	0	0	0	0	0	0	0	0	0	0.45	0.35	0.3	0	0	0	0	0	0	0	0	0	0	0	0	5	5	5	0	0	0	0	0
88	Serum amyloid P-component OS=Homo sapiens GN=APCS PE=1 SV=2	SAMP_HUMAN	25	6.52	Homo sapiens	0	0	0	0	0	0	3	4	2	0	0	0	0	0	0	0	0	0	0	0	0	0.12	0.14	0.1	0	0	0	0	0	0	0	0	0	0	0	0	3	3	2	0	0	0	0	0
89	Ig alpha-2 chain C region OS=Homo sapiens GN=IGHA2 PE=1 SV=3	IGHA2_HUMAN	37	6.02	Homo sapiens	0	0	0	0	0	0	12	10	11	0	0	0	0	0	0	0	0	0	0	0	0	0.19	0.17	0.19	0	0	0	0	0	0	0	0	0	0	0	0	2	2	2	0	0	0	0	0
90	Inter-alpha-trypsin inhibitor heavy chain H4 OS=Homo sapiens GN=ITIH4 PE=1 SV=4	ITIH4_HUMAN	103	6.97	Homo sapiens	0	0	0	0	0	0	8	7	6	0	0	0	0	0	0	0	0	0	0	0	0	0.089	0.073	0.066	0	0	0	0	0	0	0	0	0	0	0	0	8	6	6	0	0	0	0	0
91	Actin, cytoplasmic 1 OS=Homo sapiens GN=ACTB PE=1 SV=1	ACTB_HUMAN	42	5.15	Homo sapiens	0	0	0	0	0	0	0	0	2	0	0	0	0	0	0	0	0	0	0	0	0	0	0	0.069	0	0	0	0	0	0	0	0	0	0	0	0	0	0	2	0	0	0	0	0
92	Apolipoprotein A-II OS=Homo sapiens GN=APOA2 PE=1 SV=1	APOA2_HUMAN	11	6.6	Homo sapiens	0	0	0	0	0	0	4	7	7	0	0	0	0	0	0	0	0	0	0	0	0	0.44	0.46	0.46	0	0	0	0	0	0	0	0	0	0	0	0	3	4	5	0	0	0	0	0
93	Hemoglobin subunit alpha OS=Homo sapiens GN=HBA1 PE=1 SV=2	HBA_HUMAN	15	9.09	Homo sapiens	0	0	0	0	0	0	0	0	0	0	0	3	0	0	0	0	0	0	0	0	0	0	0	0	0	0	0.17	0	0	0	0	0	0	0	0	0	0	0	0	0	0	2	0	0
94	Alpha-1B-glycoprotein OS=Homo sapiens GN=A1BG PE=1 SV=4	A1BG_HUMAN	54	5.71	Homo sapiens	0	0	0	0	0	0	8	7	6	0	0	0	0	0	0	0	0	0	0	0	0	0.24	0.15	0.15	0	0	0	0	0	0	0	0	0	0	0	0	8	6	6	0	0	0	0	0
95	Filamin-A OS=Homo sapiens GN=FLNA PE=1 SV=4	FLNA_HUMAN	281	5.95	Homo sapiens	0	0	0	4	3	3	0	0	0	4	5	3	0	0	0	0	0	0	0.018	0.013	0.0098	0	0	0	0.018	0.02	0.011	0	0	0	0	0	0	3	3	2	0	0	0	3	3	2	0	0
96	Lumican OS=Homo sapiens GN=LUM PE=1 SV=2	LUM_HUMAN	38	6.6	Homo sapiens	0	0	0	0	0	0	5	7	6	0	0	0	0	0	0	0	0	0	0	0	0	0.21	0.21	0.21	0	0	0	0	0	0	0	0	0	0	0	0	5	5	5	0	0	0	0	0
97	Mannan-binding lectin serine protease 1 OS=Homo sapiens GN=MASP1 PE=1 SV=3	MASP1_HUMAN	79	5.18	Homo sapiens	0	0	0	0	0	0	9	9	8	0	0	0	0	0	0	0	0	0	0	0	0	0.13	0.14	0.12	0	0	0	0	0	0	0	0	0	0	0	0	6	6	5	0	0	0	0	0
98	Dermcidin OS=Homo sapiens GN=DCD PE=1 SV=2	DCD_HUMAN	11	6.52	Homo sapiens	2	0	0	3	0	0	0	0	0	2	2	0	0	0	0	0.2	0	0	0.21	0	0	0	0	0	0.2	0.2	0	0	0	0	2	0	0	3	0	0	0	0	0	2	2	0	0	0
99	Gelsolin OS=Homo sapiens GN=GSN PE=1 SV=1	GELS_HUMAN	86	6.19	Homo sapiens	0	0	0	0	0	0	5	6	4	0	0	0	0	0	0	0	0	0	0	0	0	0.069	0.069	0.055	0	0	0	0	0	0	0	0	0	0	0	0	4	4	3	0	0	0	0	0
100	Secreted phosphoprotein 24 OS=Homo sapiens GN=SPP2 PE=1 SV=1	SPP24_HUMAN	24	8.46	Homo sapiens	0	0	0	0	0	0	5	5	5	0	0	0	0	0	0	0	0	0	0	0	0	0.12	0.18	0.12	0	0	0	0	0	0	0	0	0	0	0	0	3	4	3	0	0	0	0	0
101	Beta-Ala-His dipeptidase OS=Homo sapiens GN=CNDP1 PE=1 SV=4	CNDP1_HUMAN	57	4.95	Homo sapiens	0	0	0	0	0	0	3	4	3	0	0	0	0	0	0	0	0	0	0	0	0	0.093	0.14	0.079	0	0	0	0	0	0	0	0	0	0	0	0	3	4	3	0	0	0	0	0
102	Complement component C8 beta chain OS=Homo sapiens GN=C8B PE=1 SV=3	CO8B_HUMAN	67	8.17	Homo sapiens	0	0	0	0	0	0	4	2	2	0	0	0	0	0	0	0	0	0	0	0	0	0.069	0.034	0.037	0	0	0	0	0	0	0	0	0	0	0	0	4	2	2	0	0	0	0	0
103	Pigment epithelium-derived factor OS=Homo sapiens GN=SERPINF1 PE=1 SV=4	PEDF_HUMAN	46	6.33	Homo sapiens	0	0	0	0	0	0	6	6	4	0	0	0	0	0	0	0	0	0	0	0	0	0.17	0.16	0.12	0	0	0	0	0	0	0	0	0	0	0	0	6	6	4	0	0	0	0	0
104	Calreticulin OS=Homo sapiens GN=CALR PE=1 SV=1	CALR_HUMAN	48	4.04	Homo sapiens	0	0	0	0	0	0	4	4	2	0	0	0	0	0	0	0	0	0	0	0	0	0.096	0.096	0.067	0	0	0	0	0	0	0	0	0	0	0	0	3	3	2	0	0	0	0	0
105	Hemopexin OS=Homo sapiens GN=HPX PE=1 SV=2	HEMO_HUMAN	52	7.02	Homo sapiens	0	0	0	0	0	0	5	5	6	0	0	0	0	0	0	0	0	0	0	0	0	0.12	0.14	0.14	0	0	0	0	0	0	0	0	0	0	0	0	4	5	5	0	0	0	0	0
106	Complement component C8 gamma chain OS=Homo sapiens GN=C8G PE=1 SV=3	CO8G_HUMAN	22	8.48	Homo sapiens	0	0	0	0	0	0	3	4	4	0	0	0	0	0	0	0	0	0	0	0	0	0.16	0.24	0.24	0	0	0	0	0	0	0	0	0	0	0	0	3	4	4	0	0	0	0	0
107	Tropomyosin alpha-4 chain OS=Homo sapiens GN=TPM4 PE=1 SV=3	TPM4_HUMAN	29	4.36	Homo sapiens	0	0	0	0	0	0	0	0	0	0	0	0	0	0	0	0	0	0	0	0	0	0	0	0	0	0	0	0	0	0	0	0	0	0	0	0	0	0	0	0	0	0	0	0
108	Alpha-2-antiplasmin OS=Homo sapiens GN=SERPINF2 PE=1 SV=3	A2AP_HUMAN	55	6.24	Homo sapiens	0	0	0	0	0	0	6	5	7	0	0	0	0	0	0	0	0	0	0	0	0	0.14	0.14	0.14	0	0	0	0	0	0	0	0	0	0	0	0	4	5	5	0	0	0	0	0
109	Phosphatidylinositol-glycan-specific phospholipase D OS=Homo sapiens GN=GPLD1 PE=1 SV=3	PHLD_HUMAN	92	6.33	Homo sapiens	0	0	0	0	0	0	5	4	7	0	0	0	0	0	0	0	0	0	0	0	0	0.061	0.06	0.1	0	0	0	0	0	0	0	0	0	0	0	0	4	4	6	0	0	0	0	0
110	Antithrombin-III OS=Homo sapiens GN=SERPINC1 PE=1 SV=1	ANT3_HUMAN	53	6.68	Homo sapiens	0	0	0	0	0	0	8	6	6	0	0	0	0	0	0	0	0	0	0	0	0	0.2	0.15	0.15	0	0	0	0	0	0	0	0	0	0	0	0	7	5	5	0	0	0	0	0
111	Desmoplakin OS=Homo sapiens GN=DSP PE=1 SV=3	DESP_HUMAN	332	6.78	Homo sapiens	0	0	0	0	0	0	0	0	0	0	0	0	0	0	0	0	0	0	0	0	0	0	0	0	0	0	0	0	0	0	0	0	0	0	0	0	0	0	0	0	0	0	0	0
112	Angiotensinogen OS=Homo sapiens GN=AGT PE=1 SV=1	ANGT_HUMAN	53	6.27	Homo sapiens	0	0	0	0	0	0	7	6	6	0	0	0	0	0	0	0	0	0	0	0	0	0.099	0.11	0.093	0	0	0	0	0	0	0	0	0	0	0	0	5	5	4	0	0	0	0	0
113	Calmodulin-like protein 5 OS=Homo sapiens GN=CALML5 PE=1 SV=2	CALL5_HUMAN	16	4.05	Homo sapiens	0	0	0	0	0	0	0	0	0	0	0	0	0	0	0	0	0	0	0	0	0	0	0	0	0	0	0	0	0	0	0	0	0	0	0	0	0	0	0	0	0	0	0	0
114	Vitamin D-binding protein OS=Homo sapiens GN=GC PE=1 SV=1	VTDB_HUMAN	53	5.21	Homo sapiens	0	0	0	0	0	0	5	2	2	0	0	0	0	0	0	0	0	0	0	0	0	0.18	0.055	0.061	0	0	0	0	0	0	0	0	0	0	0	0	5	2	2	0	0	0	0	0
115	Ig heavy chain V-III region 23 OS=Homo sapiens GN=IGHV3-23 PE=1 SV=2	HV303_HUMAN	13	8.46	Homo sapiens	0	0	0	0	0	0	2	2	0	0	0	0	3	0	0	0	0	0	0	0	0	0.26	0.26	0	0	0	0	0.22	0	0	0	0	0	0	0	0	2	2	0	0	0	0	3	0
116	Ficolin-2 OS=Homo sapiens GN=FCN2 PE=1 SV=2	FCN2_HUMAN	34	6.77	Homo sapiens	0	0	0	2	2	2	0	0	0	0	0	0	0	0	0	0	0	0	0.077	0.077	0.077	0	0	0	0	0	0	0	0	0	0	0	0	2	2	2	0	0	0	0	0	0	0	0
117	Complement factor H-related protein 1 OS=Homo sapiens GN=CFHR1 PE=1 SV=2	FHR1_HUMAN	38	7.42	Homo sapiens	0	0	0	0	0	0	9	0	7	0	0	0	0	0	0	0	0	0	0	0	0	0.17	0	0.18	0	0	0	0	0	0	0	0	0	0	0	0	3	0	2	0	0	0	0	0
118	Complement C1q subcomponent subunit A OS=Homo sapiens GN=C1QA PE=1 SV=2	C1QA_HUMAN	26	9.45	Homo sapiens	0	0	2	2	2	2	0	0	0	0	0	0	0	0	0	0	0	0.045	0.045	0.045	0.045	0	0	0	0	0	0	0	0	0	0	0	2	2	2	2	0	0	0	0	0	0	0	0
119	Platelet factor 4 OS=Homo sapiens GN=PF4 PE=1 SV=2	PLF4_HUMAN	11	8.78	Homo sapiens	0	0	0	0	2	0	0	0	0	0	0	0	0	0	0	0	0	0	0	0.17	0	0	0	0	0	0	0	0	0	0	0	0	0	0	2	0	0	0	0	0	0	0	0	0
120	Ig heavy chain V-I region V35 OS=Homo sapiens PE=1 SV=1	HV103_HUMAN	13	9.87	Homo sapiens	0	0	0	0	0	0	0	0	0	0	0	0	0	0	0	0	0	0	0	0	0	0	0	0	0	0	0	0	0	0	0	0	0	0	0	0	0	0	0	0	0	0	0	0
121	Ig gamma-4 chain C region OS=Homo sapiens GN=IGHG4 PE=1 SV=1	IGHG4_HUMAN	36	7.41	Homo sapiens	0	0	0	0	0	0	13	21	16	0	0	0	0	0	0	0	0	0	0	0	0	0.34	0.43	0.43	0	0	0	0	0	0	0	0	0	0	0	0	2	3	3	0	0	0	0	0
122	Integrin beta-3 OS=Homo sapiens GN=ITGB3 PE=1 SV=2	ITB3_HUMAN	87	4.85	Homo sapiens	0	0	0	0	0	0	0	0	0	4	2	5	0	0	0	0	0	0	0	0	0	0	0	0	0.047	0.024	0.058	0	0	0	0	0	0	0	0	0	0	0	0	4	2	5	0	0
123	Serum paraoxonase/lactonase 3 OS=Homo sapiens GN=PON3 PE=1 SV=3	PON3_HUMAN	40	5.1	Homo sapiens	0	0	0	0	0	0	0	4	6	0	0	0	0	0	0	0	0	0	0	0	0	0	0.09	0.09	0	0	0	0	0	0	0	0	0	0	0	0	0	2	2	0	0	0	0	0
124	Ig lambda chain V-I region HA OS=Homo sapiens PE=1 SV=1	LV102_HUMAN	12	5.69	Homo sapiens	0	0	0	0	0	0	2	2	0	0	0	0	0	0	0	0	0	0	0	0	0	0.21	0.21	0	0	0	0	0	0	0	0	0	0	0	0	0	2	2	0	0	0	0	0	0
125	Galectin-3-binding protein OS=Homo sapiens GN=LGALS3BP PE=1 SV=1	LG3BP_HUMAN	65	4.9	Homo sapiens	0	0	0	0	0	0	0	0	0	0	0	0	3	2	5	0	0	0	0	0	0	0	0	0	0	0	0	0.051	0.039	0.05	0	0	0	0	0	0	0	0	0	0	0	0	3	2
126	Complement C4-B OS=Homo sapiens GN=C4B PE=1 SV=2	CO4B_HUMAN	193	7.28	Homo sapiens	0	0	0	0	0	0	98	98	96	0	0	0	0	0	0	0	0	0	0	0	0	0.36	0.35	0.33	0	0	0	0	0	0	0	0	0	0	0	0	3	3	3	0	0	0	0	0
127	Complement C1q subcomponent subunit B OS=Homo sapiens GN=C1QB PE=1 SV=3	C1QB_HUMAN	27	8.87	Homo sapiens	0	0	0	0	0	0	2	0	2	0	0	0	0	0	0	0	0	0	0	0	0	0.11	0	0.11	0	0	0	0	0	0	0	0	0	0	0	0	2	0	2	0	0	0	0	0
128	Mannan-binding lectin serine protease 2 OS=Homo sapiens GN=MASP2 PE=1 SV=4	MASP2_HUMAN	76	5.37	Homo sapiens	0	0	0	0	0	0	3	3	5	0	0	0	0	0	0	0	0	0	0	0	0	0.034	0.034	0.034	0	0	0	0	0	0	0	0	0	0	0	0	2	2	2	0	0	0	0	0
129	Alpha-1-acid glycoprotein 2 OS=Homo sapiens GN=ORM2 PE=1 SV=2	A1AG2_HUMAN	24	4.76	Homo sapiens	0	0	0	0	0	0	7	8	7	0	0	0	0	0	0	0	0	0	0	0	0	0.17	0.17	0.21	0	0	0	0	0	0	0	0	0	0	0	0	3	3	3	0	0	0	0	0
130	Complement factor I OS=Homo sapiens GN=CFI PE=1 SV=2	CFAI_HUMAN	66	7.53	Homo sapiens	0	0	0	0	0	0	6	3	5	0	0	0	0	0	0	0	0	0	0	0	0	0.13	0.053	0.11	0	0	0	0	0	0	0	0	0	0	0	0	6	3	5	0	0	0	0	0
131	Endoplasmin OS=Homo sapiens GN=HSP90B1 PE=1 SV=1	ENPL_HUMAN	92	4.48	Homo sapiens	0	0	0	0	0	0	0	0	3	0	0	0	0	0	0	0	0	0	0	0	0	0	0	0.047	0	0	0	0	0	0	0	0	0	0	0	0	0	0	3	0	0	0	0	0
132	Ezrin OS=Homo sapiens GN=EZR PE=1 SV=4	EZRI_HUMAN	69	6.17	Homo sapiens	0	0	0	0	0	0	0	0	0	0	0	0	0	0	0	0	0	0	0	0	0	0	0	0	0	0	0	0	0	0	0	0	0	0	0	0	0	0	0	0	0	0	0	0
133	Ig heavy chain V-III region GA OS=Homo sapiens PE=1 SV=1	HV308_HUMAN	13	10.02	Homo sapiens	0	0	0	0	0	0	0	0	0	0	0	0	0	0	0	0	0	0	0	0	0	0	0	0	0	0	0	0	0	0	0	0	0	0	0	0	0	0	0	0	0	0	0	0
134	Apolipoprotein F OS=Homo sapiens GN=APOF PE=1 SV=2	APOF_HUMAN	35	5.36	Homo sapiens	0	0	0	0	0	0	3	3	4	0	0	0	0	0	0	0	0	0	0	0	0	0.083	0.083	0.083	0	0	0	0	0	0	0	0	0	0	0	0	2	2	2	0	0	0	0	0
135	Haptoglobin-related protein OS=Homo sapiens GN=HPR PE=2 SV=2	HPTR_HUMAN	39	7.11	Homo sapiens	0	0	0	0	0	0	0	21	23	0	0	0	0	0	0	0	0	0	0	0	0	0	0.3	0.35	0	0	0	0	0	0	0	0	0	0	0	0	0	2	2	0	0	0	0	0
136	Nephronectin OS=Homo sapiens GN=NPNT PE=2 SV=3	NPNT_HUMAN	62	8.38	Homo sapiens	0	0	0	0	0	0	0	0	0	0	0	0	0	0	0	0	0	0	0	0	0	0	0	0	0	0	0	0	0	0	0	0	0	0	0	0	0	0	0	0	0	0	0	0
137	Integrin alpha-IIb OS=Homo sapiens GN=ITGA2B PE=1 SV=3	ITA2B_HUMAN	113	5.03	Homo sapiens	0	0	0	0	0	0	0	0	0	0	0	0	0	0	0	0	0	0	0	0	0	0	0	0	0	0	0	0	0	0	0	0	0	0	0	0	0	0	0	0	0	0	0	0
138	Lipopolysaccharide-binding protein OS=Homo sapiens GN=LBP PE=1 SV=3	LBP_HUMAN	53	6.68	Homo sapiens	0	0	0	0	0	0	0	0	0	0	0	0	0	0	0	0	0	0	0	0	0	0	0	0	0	0	0	0	0	0	0	0	0	0	0	0	0	0	0	0	0	0	0	0
139	Sodium/potassium-transporting ATPase subunit alpha-2 OS=Homo sapiens GN=ATP1A2 PE=1 SV=1	AT1A2_HUMAN	112	5.33	Homo sapiens	0	0	0	0	0	0	0	0	0	0	0	0	0	0	0	0	0	0	0	0	0	0	0	0	0	0	0	0	0	0	0	0	0	0	0	0	0	0	0	0	0	0	0	0
140	Lysozyme C OS=Homo sapiens GN=LYZ PE=1 SV=1	LYSC_HUMAN	17	9.35	Homo sapiens	0	0	0	0	0	0	0	0	0	0	0	0	0	0	0	0	0	0	0	0	0	0	0	0	0	0	0	0	0	0	0	0	0	0	0	0	0	0	0	0	0	0	0	0
141	Serum amyloid A-4 protein OS=Homo sapiens GN=SAA4 PE=1 SV=2	SAA4_HUMAN	15	9.38	Homo sapiens	0	0	0	0	0	0	0	0	2	0	0	0	0	0	0	0	0	0	0	0	0	0	0	0.16	0	0	0	0	0	0	0	0	0	0	0	0	0	0	2	0	0	0	0	0
142	Ig lambda-7 chain C region OS=Homo sapiens GN=IGLC7 PE=4 SV=2	LAC7_HUMAN	11	8.48	Homo sapiens	0	0	0	0	0	0	0	0	0	0	0	0	0	0	0	0	0	0	0	0	0	0	0	0	0	0	0	0	0	0	0	0	0	0	0	0	0	0	0	0	0	0	0	0
143	Selenoprotein P OS=Homo sapiens GN=SEPP1 PE=1 SV=3	SEPP1_HUMAN	43	7.92	Homo sapiens	0	0	0	0	0	0	2	2	3	0	0	0	0	0	0	0	0	0	0	0	0	0.06	0.06	0.06	0	0	0	0	0	0	0	0	0	0	0	0	2	2	2	0	0	0	0	0
144	Collectin-11 OS=Homo sapiens GN=COLEC11 PE=1 SV=1	COL11_HUMAN	29	5.06	Homo sapiens	0	0	0	0	0	0	2	2	2	0	0	0	0	0	0	0	0	0	0	0	0	0.1	0.1	0.1	0	0	0	0	0	0	0	0	0	0	0	0	2	2	2	0	0	0	0	0
145	Lipocalin-1 OS=Homo sapiens GN=LCN1 PE=1 SV=1	LCN1_HUMAN	19	5.3	Homo sapiens	0	0	0	0	0	0	0	0	0	0	0	0	0	0	0	0	0	0	0	0	0	0	0	0	0	0	0	0	0	0	0	0	0	0	0	0	0	0	0	0	0	0	0	0
146	Prenylcysteine oxidase 1 OS=Homo sapiens GN=PCYOX1 PE=1 SV=3	PCYOX_HUMAN	57	6.1	Homo sapiens	0	0	0	0	0	0	0	0	0	0	0	3	0	0	0	0	0	0	0	0	0	0	0	0	0	0	0.038	0	0	0	0	0	0	0	0	0	0	0	0	0	0	2	0	0
147	Ig heavy chain V-III region GAL OS=Homo sapiens PE=1 SV=1	HV320_HUMAN	13	8.7	Homo sapiens	0	0	0	0	0	0	0	0	0	0	0	0	0	0	0	0	0	0	0	0	0	0	0	0	0	0	0	0	0	0	0	0	0	0	0	0	0	0	0	0	0	0	0	0
148	Ig lambda chain V-III region LOI OS=Homo sapiens PE=1 SV=1	LV302_HUMAN	12	4.72	Homo sapiens	0	0	0	0	0	0	3	2	0	0	0	0	0	0	0	0	0	0	0	0	0	0.29	0.22	0	0	0	0	0	0	0	0	0	0	0	0	0	3	2	0	0	0	0	0	0
149	Serglycin OS=Homo sapiens GN=SRGN PE=1 SV=3	SRGN_HUMAN	18	4.57	Homo sapiens	0	0	0	0	0	0	0	0	0	0	0	0	0	0	0	0	0	0	0	0	0	0	0	0	0	0	0	0	0	0	0	0	0	0	0	0	0	0	0	0	0	0	0	0
150	Filaggrin-2 OS=Homo sapiens GN=FLG2 PE=1 SV=1	FILA2_HUMAN	248	8.35	Homo sapiens	0	0	0	0	0	0	0	0	0	0	0	0	0	0	0	0	0	0	0	0	0	0	0	0	0	0	0	0	0	0	0	0	0	0	0	0	0	0	0	0	0	0	0	0
151	Keratin, type I cytoskeletal 13 OS=Homo sapiens GN=KRT13 PE=1 SV=4	K1C13_HUMAN	50	4.61	Homo sapiens	0	0	0	0	0	0	0	0	0	0	0	0	0	0	0	0	0	0	0	0	0	0	0	0	0	0	0	0	0	0	0	0	0	0	0	0	0	0	0	0	0	0	0	0
152	Apolipoprotein C-I OS=Homo sapiens GN=APOC1 PE=1 SV=1	APOC1_HUMAN	9	9.17	Homo sapiens	0	0	0	0	0	0	0	0	0	0	0	0	0	0	0	0	0	0	0	0	0	0	0	0	0	0	0	0	0	0	0	0	0	0	0	0	0	0	0	0	0	0	0	0
153	Pre-mRNA-splicing factor CWC25 homolog OS=Homo sapiens GN=CWC25 PE=1 SV=1	CWC25_HUMAN	50	10.9	Homo sapiens	0	0	0	0	0	0	0	0	0	0	0	0	0	0	0	0	0	0	0	0	0	0	0	0	0	0	0	0	0	0	0	0	0	0	0	0	0	0	0	0	0	0	0	0
154	Glutathione peroxidase 3 OS=Homo sapiens GN=GPX3 PE=1 SV=2	GPX3_HUMAN	26	8.29	Homo sapiens	0	0	0	0	0	0	2	2	2	0	0	0	0	0	0	0	0	0	0	0	0	0.12	0.12	0.12	0	0	0	0	0	0	0	0	0	0	0	0	2	2	2	0	0	0	0	0
155	Ig kappa chain V-I region HK102 (Fragment) OS=Homo sapiens GN=IGKV1-5 PE=4 SV=1	KV110_HUMAN	13	8.46	Homo sapiens	0	0	0	0	0	0	0	0	0	0	0	0	0	0	0	0	0	0	0	0	0	0	0	0	0	0	0	0	0	0	0	0	0	0	0	0	0	0	0	0	0	0	0	0
156	Ig heavy chain V-II region ARH-77 OS=Homo sapiens PE=4 SV=1	HV209_HUMAN	16	8.45	Homo sapiens	0	0	0	0	0	0	0	0	0	0	0	0	0	0	0	0	0	0	0	0	0	0	0	0	0	0	0	0	0	0	0	0	0	0	0	0	0	0	0	0	0	0	0	0
157	Erythrocyte band 7 integral membrane protein OS=Homo sapiens GN=STOM PE=1 SV=3	STOM_HUMAN	32	8.07	Homo sapiens	0	0	0	0	0	0	0	0	0	0	0	0	0	0	0	0	0	0	0	0	0	0	0	0	0	0	0	0	0	0	0	0	0	0	0	0	0	0	0	0	0	0	0	0
158	Coagulation factor VII OS=Homo sapiens GN=F7 PE=1 SV=1	FA7_HUMAN	52	7.23	Homo sapiens	0	0	0	0	0	0	2	0	2	0	0	0	0	0	0	0	0	0	0	0	0	0.049	0	0.049	0	0	0	0	0	0	0	0	0	0	0	0	2	0	2	0	0	0	0	0
159	Junction plakoglobin OS=Homo sapiens GN=JUP PE=1 SV=3	PLAK_HUMAN	82	6.05	Homo sapiens	0	0	0	0	0	0	0	0	0	0	0	0	0	0	0	0	0	0	0	0	0	0	0	0	0	0	0	0	0	0	0	0	0	0	0	0	0	0	0	0	0	0	0	0
160	Amyloid beta A4 protein OS=Homo sapiens GN=APP PE=1 SV=3	A4_HUMAN	87	4.45	Homo sapiens	0	0	0	0	0	0	0	0	0	0	0	0	0	0	0	0	0	0	0	0	0	0	0	0	0	0	0	0	0	0	0	0	0	0	0	0	0	0	0	0	0	0	0	0
161	Elongation factor 1-alpha 1 OS=Homo sapiens GN=EEF1A1 PE=1 SV=1	EF1A1_HUMAN	50	9.5	Homo sapiens	0	0	0	0	0	0	0	0	2	0	0	0	0	0	0	0	0	0	0	0	0	0	0	0.043	0	0	0	0	0	0	0	0	0	0	0	0	0	0	2	0	0	0	0	0
162	Aggrecan core protein OS=Homo sapiens GN=ACAN PE=1 SV=2	PGCA_HUMAN	250	3.82	Homo sapiens	0	0	0	0	0	0	2	2	0	0	0	0	0	0	0	0	0	0	0	0	0	0.011	0.011	0	0	0	0	0	0	0	0	0	0	0	0	0	2	2	0	0	0	0	0	0
163	Heat shock 70 kDa protein 1-like OS=Homo sapiens GN=HSPA1L PE=1 SV=2	HS71L_HUMAN	70	5.82	Homo sapiens	0	0	0	0	0	0	2	2	0	0	0	0	0	0	0	0	0	0	0	0	0	0.041	0.041	0	0	0	0	0	0	0	0	0	0	0	0	0	2	2	0	0	0	0	0	0
164	Ig kappa chain V-IV region (Fragment) OS=Homo sapiens GN=IGKV4-1 PE=4 SV=1	KV401_HUMAN	13	4.85	Homo sapiens	0	0	0	0	0	0	0	0	0	0	0	0	0	0	0	0	0	0	0	0	0	0	0	0	0	0	0	0	0	0	0	0	0	0	0	0	0	0	0	0	0	0	0	0
165	Angiopoietin-related protein 6 OS=Homo sapiens GN=ANGPTL6 PE=1 SV=1	ANGL6_HUMAN	52	8.64	Homo sapiens	0	0	0	0	0	0	0	2	3	0	0	0	0	0	0	0	0	0	0	0	0	0	0.062	0.062	0	0	0	0	0	0	0	0	0	0	0	0	0	2	2	0	0	0	0	0
166	Desmocollin-1 OS=Homo sapiens GN=DSC1 PE=1 SV=2	DSC1_HUMAN	100	5.08	Homo sapiens	0	0	0	0	0	0	0	0	0	0	0	0	0	0	0	0	0	0	0	0	0	0	0	0	0	0	0	0	0	0	0	0	0	0	0	0	0	0	0	0	0	0	0	0
167	14-3-3 protein zeta/delta OS=Homo sapiens GN=YWHAZ PE=1 SV=1	1433Z_HUMAN	28	4.43	Homo sapiens	0	0	0	0	0	0	0	0	0	0	0	0	0	0	0	0	0	0	0	0	0	0	0	0	0	0	0	0	0	0	0	0	0	0	0	0	0	0	0	0	0	0	0	0
168	Apolipoprotein L1 OS=Homo sapiens GN=APOL1 PE=1 SV=5	APOL1_HUMAN	44	5.55	Homo sapiens	0	0	0	0	0	0	0	3	2	0	0	0	0	0	0	0	0	0	0	0	0	0	0.083	0.045	0	0	0	0	0	0	0	0	0	0	0	0	0	3	2	0	0	0	0	0
169	Carboxypeptidase N catalytic chain OS=Homo sapiens GN=CPN1 PE=1 SV=1	CBPN_HUMAN	52	7.36	Homo sapiens	0	0	0	0	0	0	0	0	2	0	0	0	0	0	0	0	0	0	0	0	0	0	0	0.061	0	0	0	0	0	0	0	0	0	0	0	0	0	0	2	0	0	0	0	0
170	Complement component C7 OS=Homo sapiens GN=C7 PE=1 SV=2	CO7_HUMAN	94	6.44	Homo sapiens	0	0	0	0	0	0	2	0	2	0	0	0	0	0	0	0	0	0	0	0	0	0.04	0	0.04	0	0	0	0	0	0	0	0	0	0	0	0	2	0	2	0	0	0	0	0
171	Neutrophil defensin 1 OS=Homo sapiens GN=DEFA1 PE=1 SV=1	DEF1_HUMAN	10	7.04	Homo sapiens	0	0	0	0	0	0	0	0	0	0	2	2	0	0	0	0	0	0	0	0	0	0	0	0	0	0.19	0.19	0	0	0	0	0	0	0	0	0	0	0	0	0	2	2	0	0
172	Filaggrin OS=Homo sapiens GN=FLG PE=1 SV=3	FILA_HUMAN	435	9.6	Homo sapiens	0	0	0	0	0	0	0	0	0	0	0	0	0	0	0	0	0	0	0	0	0	0	0	0	0	0	0	0	0	0	0	0	0	0	0	0	0	0	0	0	0	0	0	0
173	Plasma kallikrein OS=Homo sapiens GN=KLKB1 PE=1 SV=1	KLKB1_HUMAN	71	8.26	Homo sapiens	0	0	0	0	0	0	0	2	0	0	0	0	0	0	0	0	0	0	0	0	0	0	0.034	0	0	0	0	0	0	0	0	0	0	0	0	0	0	2	0	0	0	0	0	0
174	Tubulin alpha-4A chain OS=Homo sapiens GN=TUBA4A PE=1 SV=1	TBA4A_HUMAN	50	4.69	Homo sapiens	0	0	0	0	0	0	0	0	0	0	0	0	0	0	0	0	0	0	0	0	0	0	0	0	0	0	0	0	0	0	0	0	0	0	0	0	0	0	0	0	0	0	0	0
175	Extracellular superoxide dismutase [Cu-Zn] OS=Homo sapiens GN=SOD3 PE=1 SV=2	SODE_HUMAN	26	6.59	Homo sapiens	0	0	0	0	0	0	0	0	0	0	0	0	0	0	0	0	0	0	0	0	0	0	0	0	0	0	0	0	0	0	0	0	0	0	0	0	0	0	0	0	0	0	0	0
176	Fibulin-1 OS=Homo sapiens GN=FBLN1 PE=1 SV=4	FBLN1_HUMAN	77	4.86	Homo sapiens	0	0	0	0	0	0	0	0	0	0	0	0	0	0	0	0	0	0	0	0	0	0	0	0	0	0	0	0	0	0	0	0	0	0	0	0	0	0	0	0	0	0	0	0
177	Complement factor B OS=Homo sapiens GN=CFB PE=1 SV=2	CFAB_HUMAN	86	7.07	Homo sapiens	0	0	0	0	0	0	0	0	0	0	0	0	0	0	0	0	0	0	0	0	0	0	0	0	0	0	0	0	0	0	0	0	0	0	0	0	0	0	0	0	0	0	0	0
178	Afamin OS=Homo sapiens GN=AFM PE=1 SV=1	AFAM_HUMAN	69	5.7	Homo sapiens	0	0	0	0	0	0	0	3	2	0	0	0	0	0	0	0	0	0	0	0	0	0	0.047	0.03	0	0	0	0	0	0	0	0	0	0	0	0	0	3	2	0	0	0	0	0
179	Phospholipid transfer protein OS=Homo sapiens GN=PLTP PE=1 SV=1	PLTP_HUMAN	55	7.01	Homo sapiens	0	0	0	0	0	0	0	2	0	0	0	0	0	0	0	0	0	0	0	0	0	0	0.047	0	0	0	0	0	0	0	0	0	0	0	0	0	0	2	0	0	0	0	0	0
180	Desmoglein-1 OS=Homo sapiens GN=DSG1 PE=1 SV=2	DSG1_HUMAN	114	4.66	Homo sapiens	0	0	0	0	0	0	0	0	0	0	0	0	0	0	0	0	0	0	0	0	0	0	0	0	0	0	0	0	0	0	0	0	0	0	0	0	0	0	0	0	0	0	0	0
181	Collectin-10 OS=Homo sapiens GN=COLEC10 PE=2 SV=2	COL10_HUMAN	31	7.39	Homo sapiens	0	0	0	0	0	0	0	0	0	0	0	0	0	0	0	0	0	0	0	0	0	0	0	0	0	0	0	0	0	0	0	0	0	0	0	0	0	0	0	0	0	0	0	0
182	Small proline-rich protein 2A OS=Homo sapiens GN=SPRR2A PE=1 SV=1	SPR2A_HUMAN	8	8.49	Homo sapiens	0	0	0	0	0	0	0	0	0	0	0	0	0	0	0	0	0	0	0	0	0	0	0	0	0	0	0	0	0	0	0	0	0	0	0	0	0	0	0	0	0	0	0	0
183	Glyceraldehyde-3-phosphate dehydrogenase OS=Homo sapiens GN=GAPDH PE=1 SV=3	G3P_HUMAN	36	8.73	Homo sapiens	0	0	0	0	0	0	0	0	0	0	0	0	0	0	0	0	0	0	0	0	0	0	0	0	0	0	0	0	0	0	0	0	0	0	0	0	0	0	0	0	0	0	0	0
184	Keratin, type II cytoskeletal 78 OS=Homo sapiens GN=KRT78 PE=2 SV=2	K2C78_HUMAN	57	5.83	Homo sapiens	0	0	0	0	0	0	0	0	0	0	0	0	0	0	0	0	0	0	0	0	0	0	0	0	0	0	0	0	0	0	0	0	0	0	0	0	0	0	0	0	0	0	0	0
185	Alpha-amylase 1 OS=Homo sapiens GN=AMY1A PE=1 SV=2	AMY1_HUMAN	58	6.92	Homo sapiens	0	0	0	0	0	0	0	0	0	0	0	0	0	0	0	0	0	0	0	0	0	0	0	0	0	0	0	0	0	0	0	0	0	0	0	0	0	0	0	0	0	0	0	0
186	Glucosidase 2 subunit beta OS=Homo sapiens GN=PRKCSH PE=1 SV=2	GLU2B_HUMAN	59	4.05	Homo sapiens	0	0	0	0	0	0	0	0	0	0	0	0	0	0	0	0	0	0	0	0	0	0	0	0	0	0	0	0	0	0	0	0	0	0	0	0	0	0	0	0	0	0	0	0
187	Dickkopf-related protein 3 OS=Homo sapiens GN=DKK3 PE=1 SV=2	DKK3_HUMAN	38	4.3	Homo sapiens	0	0	0	0	0	0	0	0	2	0	0	0	0	0	0	0	0	0	0	0	0	0	0	0.077	0	0	0	0	0	0	0	0	0	0	0	0	0	0	2	0	0	0	0	0
188	Keratin, type II cytoskeletal 4 OS=Homo sapiens GN=KRT4 PE=1 SV=4	K2C4_HUMAN	57	6.55	Homo sapiens	0	0	0	0	0	0	0	0	0	0	0	0	0	0	0	0	0	0	0	0	0	0	0	0	0	0	0	0	0	0	0	0	0	0	0	0	0	0	0	0	0	0	0	0
189	Trypsin-1 OS=Homo sapiens GN=PRSS1 PE=1 SV=1	TRY1_HUMAN	27	6.49	Homo sapiens	0	0	0	0	0	0	0	0	0	0	0	0	0	0	0	0	0	0	0	0	0	0	0	0	0	0	0	0	0	0	0	0	0	0	0	0	0	0	0	0	0	0	0	0
190	Integrin beta-1 OS=Homo sapiens GN=ITGB1 PE=1 SV=2	ITB1_HUMAN	88	5.04	Homo sapiens	0	0	0	0	0	0	0	0	0	0	0	0	0	0	0	0	0	0	0	0	0	0	0	0	0	0	0	0	0	0	0	0	0	0	0	0	0	0	0	0	0	0	0	0
191	Prolactin-inducible protein OS=Homo sapiens GN=PIP PE=1 SV=1	PIP_HUMAN	17	8.18	Homo sapiens	0	0	0	0	0	0	0	0	0	0	0	0	0	0	0	0	0	0	0	0	0	0	0	0	0	0	0	0	0	0	0	0	0	0	0	0	0	0	0	0	0	0	0	0
192	Extracellular glycoprotein lacritin OS=Homo sapiens GN=LACRT PE=1 SV=1	LACRT_HUMAN	14	5.2	Homo sapiens	0	0	0	0	0	0	0	0	0	0	0	0	0	0	0	0	0	0	0	0	0	0	0	0	0	0	0	0	0	0	0	0	0	0	0	0	0	0	0	0	0	0	0	0
193	Suprabasin OS=Homo sapiens GN=SBSN PE=1 SV=2	SBSN_HUMAN	61	7.01	Homo sapiens	0	0	0	0	0	0	0	0	0	0	0	0	0	0	0	0	0	0	0	0	0	0	0	0	0	0	0	0	0	0	0	0	0	0	0	0	0	0	0	0	0	0	0	0
194	Platelet basic protein OS=Homo sapiens GN=PPBP PE=1 SV=3	CXCL7_HUMAN	14	9.07	Homo sapiens	0	0	0	0	0	0	0	0	0	0	0	0	0	0	0	0	0	0	0	0	0	0	0	0	0	0	0	0	0	0	0	0	0	0	0	0	0	0	0	0	0	0	0	0
195	Tubulin beta-1 chain OS=Homo sapiens GN=TUBB1 PE=1 SV=1	TBB1_HUMAN	50	4.82	Homo sapiens	0	0	0	0	0	0	0	0	0	0	0	0	0	0	0	0	0	0	0	0	0	0	0	0	0	0	0	0	0	0	0	0	0	0	0	0	0	0	0	0	0	0	0	0
[truncated: 143 more columns]
