# Supplementary material for: Disease-specific protein corona sensor arrays may have disease detection capacity
Source: Royal Society of Chemistry journal article supplement (doi:10.1039/c9nh00097f), 2019-01-01
Supplement: c9nh00097f6.xlsx [file c9nh00097f6.xlsx]

## Sheet: Sample Report for Pancreas
Pnacreas tumor						CHOL
						Spectral counts															Percent coverage															Unique peptide
#	Identified Proteins (195)	Accession Number	Molecular Weight	pI	Taxonomy	2016-11-16_CHOLPC_pancreas_A_01	2016-11-16_CHOLPC_pancreas_A_02	2016-11-16_CHOLPC_pancreas_A_03	2016-11-16_CHOLPC_pancreas_B_01	2016-11-16_CHOLPC_pancreas_B_02	2016-11-16_CHOLPC_pancreas_B_03	2016-11-16_DOTAP_DOPE_pancreas_C_01	2016-11-16_DOTAP_DOPE_pancreas_C_02	2016-11-16_DOTAP_DOPE_pancreas_C_03	2016-11-16_CHOLPC_pancreas_D_01	2016-11-16_CHOLPC_pancreas_D_02	2016-11-16_CHOLPC_pancreas_D_03	2016-11-16_CHOLPC_pancreas_E_01	2016-11-16_CHOLPC_pancreas_E_02	2016-11-16_CHOLPC_pancreas_E_03	2016-11-16_CHOLPC_pancreas_A_01	2016-11-16_CHOLPC_pancreas_A_02	2016-11-16_CHOLPC_pancreas_A_03	2016-11-16_CHOLPC_pancreas_B_01	2016-11-16_CHOLPC_pancreas_B_02	2016-11-16_CHOLPC_pancreas_B_03	2016-11-16_DOTAP_DOPE_pancreas_C_01	2016-11-16_DOTAP_DOPE_pancreas_C_02	2016-11-16_DOTAP_DOPE_pancreas_C_03	2016-11-16_CHOLPC_pancreas_D_01	2016-11-16_CHOLPC_pancreas_D_02	2016-11-16_CHOLPC_pancreas_D_03	2016-11-16_CHOLPC_pancreas_E_01	2016-11-16_CHOLPC_pancreas_E_02	2016-11-16_CHOLPC_pancreas_E_03	2016-11-16_CHOLPC_pancreas_A_01	2016-11-16_CHOLPC_pancreas_A_02	2016-11-16_CHOLPC_pancreas_A_03	2016-11-16_CHOLPC_pancreas_B_01	2016-11-16_CHOLPC_pancreas_B_02	2016-11-16_CHOLPC_pancreas_B_03	2016-11-16_DOTAP_DOPE_pancreas_C_01	2016-11-16_DOTAP_DOPE_pancreas_C_02	2016-11-16_DOTAP_DOPE_pancreas_C_03	2016-11-16_CHOLPC_pancreas_D_01	2016-11-16_CHOLPC_pancreas_D_02	2016-11-16_CHOLPC_pancreas_D_03	2016-11-16_CHOLPC_pancreas_E_01	2016-11-16_CHOLPC_pancreas_E_02
1	Apolipoprotein B-100 OS=Homo sapiens GN=APOB PE=1 SV=2	APOB_HUMAN	516	7.04	Homo sapiens	19	15	19	36	42	34	255	245	250	78	69	70	7	8	7	0.045	0.035	0.043	0.068	0.073	0.067	0.38	0.36	0.35	0.13	0.11	0.12	0.016	0.018	0.016	18	14	17	30	33	29	156	150	145	54	48	52	7	8
2	Vitronectin OS=Homo sapiens GN=VTN PE=1 SV=1	VTNC_HUMAN	54	5.54	Homo sapiens	12	0	0	0	0	0	198	230	235	0	0	0	0	0	0	0.088	0	0	0	0	0	0.33	0.31	0.32	0	0	0	0	0	0	3	0	0	0	0	0	15	14	14	0	0	0	0	0
3	Complement C3 OS=Homo sapiens GN=C3 PE=1 SV=2	CO3_HUMAN	187	6.34	Homo sapiens	17	13	14	19	22	19	189	188	195	29	25	28	17	18	18	0.068	0.054	0.072	0.081	0.097	0.079	0.52	0.51	0.53	0.13	0.11	0.12	0.059	0.065	0.064	14	11	12	15	17	14	78	75	78	23	18	21	13	13
4	Ig gamma-1 chain C region OS=Homo sapiens GN=IGHG1 PE=1 SV=1	IGHG1_HUMAN	36	8.31	Homo sapiens	20	22	21	26	24	25	43	50	41	37	43	42	19	16	20	0.42	0.38	0.32	0.48	0.53	0.53	0.4	0.44	0.4	0.47	0.53	0.43	0.33	0.3	0.3	11	11	8	11	12	12	11	12	11	12	13	11	11	9
5	Ig mu chain C region OS=Homo sapiens GN=IGHM PE=1 SV=3	IGHM_HUMAN	49	6.77	Homo sapiens	23	30	29	34	35	40	55	50	48	17	17	20	54	59	55	0.18	0.2	0.24	0.2	0.25	0.25	0.35	0.33	0.35	0.18	0.16	0.2	0.29	0.29	0.27	7	8	10	10	10	11	13	12	13	7	6	8	13	13
6	Serum albumin OS=Homo sapiens GN=ALB PE=1 SV=2	ALBU_HUMAN	69	6.21	Homo sapiens	15	19	18	15	17	18	76	76	79	14	17	15	12	11	15	0.18	0.24	0.2	0.21	0.24	0.25	0.57	0.56	0.56	0.23	0.24	0.22	0.13	0.19	0.13	11	15	12	12	14	14	36	33	36	12	12	12	8	10
7	C4b-binding protein alpha chain OS=Homo sapiens GN=C4BPA PE=1 SV=2	C4BPA_HUMAN	67	7.31	Homo sapiens	6	5	6	8	5	5	87	88	89	7	5	5	5	2	5	0.08	0.067	0.08	0.092	0.067	0.067	0.47	0.45	0.46	0.12	0.097	0.084	0.067	0.034	0.079	4	4	4	5	3	3	25	24	25	7	5	4	5	2
8	Keratin, type II cytoskeletal 1 OS=Homo sapiens GN=KRT1 PE=1 SV=6	K2C1_HUMAN	66	8.33	Homo sapiens	6	5	8	31	27	30	36	35	32	31	30	30	15	14	12	0.12	0.065	0.11	0.46	0.41	0.45	0.42	0.38	0.34	0.48	0.44	0.46	0.29	0.26	0.25	6	5	7	25	21	24	25	23	22	25	25	26	14	11
9	Complement C4-A OS=Homo sapiens GN=C4A PE=1 SV=2	CO4A_HUMAN	193	7.08	Homo sapiens	5	6	7	11	8	10	95	96	95	7	5	6	5	5	5	0.03	0.038	0.045	0.049	0.037	0.05	0.34	0.33	0.33	0.045	0.032	0.04	0.019	0.019	0.019	5	6	7	8	6	8	49	49	49	7	5	6	3	3
10	Prothrombin OS=Homo sapiens GN=F2 PE=1 SV=2	THRB_HUMAN	70	5.7	Homo sapiens	0	0	0	0	0	0	108	111	115	0	0	0	0	0	0	0	0	0	0	0	0	0.43	0.46	0.47	0	0	0	0	0	0	0	0	0	0	0	0	25	27	29	0	0	0	0	0
11	Keratin, type I cytoskeletal 9 OS=Homo sapiens GN=KRT9 PE=1 SV=3	K1C9_HUMAN	62	4.89	Homo sapiens	9	7	8	20	17	17	17	16	20	21	24	20	8	8	10	0.19	0.17	0.19	0.33	0.27	0.27	0.35	0.26	0.35	0.35	0.33	0.33	0.18	0.18	0.22	7	6	7	15	12	11	14	12	15	14	13	13	6	6
12	Apolipoprotein D OS=Homo sapiens GN=APOD PE=1 SV=1	APOD_HUMAN	21	4.79	Homo sapiens	8	9	6	14	17	10	48	42	42	20	16	21	0	0	2	0.21	0.21	0.21	0.25	0.29	0.25	0.41	0.41	0.41	0.31	0.31	0.35	0	0	0.15	4	5	4	5	6	5	9	9	9	6	6	7	0	0
13	Fibrinogen beta chain OS=Homo sapiens GN=FGB PE=1 SV=2	FIBB_HUMAN	56	8.38	Homo sapiens	0	0	0	5	5	6	64	65	72	13	16	13	0	0	0	0	0	0	0.1	0.096	0.12	0.51	0.48	0.48	0.13	0.18	0.18	0	0	0	0	0	0	4	4	5	23	22	24	7	9	8	0	0
14	Ig kappa chain C region OS=Homo sapiens GN=IGKC PE=1 SV=1	IGKC_HUMAN	12	5.68	Homo sapiens	10	11	11	18	20	15	17	16	20	12	11	9	14	11	6	0.51	0.71	0.42	0.75	0.91	0.75	0.49	0.49	0.56	0.5	0.5	0.37	0.5	0.56	0.39	4	6	4	8	9	7	4	3	5	4	4	3	4	6
15	Hyaluronan-binding protein 2 OS=Homo sapiens GN=HABP2 PE=1 SV=1	HABP2_HUMAN	63	6.52	Homo sapiens	0	0	0	0	0	0	53	49	61	0	0	0	0	0	0	0	0	0	0	0	0	0.38	0.37	0.37	0	0	0	0	0	0	0	0	0	0	0	0	19	18	20	0	0	0	0	0
16	Complement factor H OS=Homo sapiens GN=CFH PE=1 SV=4	CFAH_HUMAN	139	6.59	Homo sapiens	0	3	3	0	0	0	58	56	54	2	0	3	0	0	0	0	0.017	0.017	0	0	0	0.35	0.36	0.35	0.019	0	0.027	0	0	0	0	2	2	0	0	0	35	35	33	2	0	3	0	0
17	Keratin, type I cytoskeletal 10 OS=Homo sapiens GN=KRT10 PE=1 SV=6	K1C10_HUMAN	59	4.88	Homo sapiens	3	2	3	12	10	12	15	16	19	10	16	13	6	8	6	0.065	0.046	0.06	0.15	0.13	0.16	0.26	0.28	0.3	0.13	0.16	0.13	0.12	0.15	0.096	3	2	3	10	9	10	13	13	15	8	12	9	6	8
18	Inter-alpha-trypsin inhibitor heavy chain H2 OS=Homo sapiens GN=ITIH2 PE=1 SV=2	ITIH2_HUMAN	106	6.85	Homo sapiens	0	0	0	0	0	0	53	61	59	0	0	0	0	0	0	0	0	0	0	0	0	0.25	0.28	0.29	0	0	0	0	0	0	0	0	0	0	0	0	22	25	26	0	0	0	0	0
19	Inter-alpha-trypsin inhibitor heavy chain H1 OS=Homo sapiens GN=ITIH1 PE=1 SV=3	ITIH1_HUMAN	101	6.78	Homo sapiens	0	0	0	0	0	0	56	60	62	0	0	0	0	0	0	0	0	0	0	0	0	0.28	0.27	0.29	0	0	0	0	0	0	0	0	0	0	0	0	21	20	21	0	0	0	0	0
20	Haptoglobin OS=Homo sapiens GN=HP PE=1 SV=1	HPT_HUMAN	45	6.56	Homo sapiens	2	3	3	3	0	0	39	48	50	5	4	2	0	3	2	0.069	0.057	0.057	0.099	0	0	0.41	0.4	0.42	0.15	0.12	0.071	0	0.052	0.052	2	2	2	3	0	0	17	19	21	5	4	2	0	2
21	Ig lambda-2 chain C regions OS=Homo sapiens GN=IGLC2 PE=1 SV=1	LAC2_HUMAN	11	7.34	Homo sapiens	9	12	8	21	18	19	0	22	19	21	17	16	11	9	12	0.42	0.42	0.42	0.56	0.75	0.56	0	0.56	0.56	0.49	0.42	0.42	0.56	0.56	0.56	2	2	2	2	2	2	0	2	2	2	2	2	2	2
22	Fibrinogen gamma chain OS=Homo sapiens GN=FGG PE=1 SV=3	FIBG_HUMAN	52	5.32	Homo sapiens	0	0	0	3	3	3	28	33	33	4	5	6	0	0	2	0	0	0	0.075	0.046	0.064	0.4	0.4	0.35	0.093	0.093	0.11	0	0	0.04	0	0	0	3	2	3	16	15	16	4	4	5	0	0
23	Ig gamma-2 chain C region OS=Homo sapiens GN=IGHG2 PE=1 SV=2	IGHG2_HUMAN	36	7.66	Homo sapiens	0	0	0	18	15	18	21	27	28	27	27	30	11	11	13	0	0	0	0.32	0.26	0.3	0.2	0.24	0.36	0.19	0.21	0.23	0.22	0.26	0.22	0	0	0	6	5	4	2	3	5	3	3	4	3	5
24	Alpha-2-macroglobulin OS=Homo sapiens GN=A2M PE=1 SV=3	A2MG_HUMAN	163	6.43	Homo sapiens	4	3	0	2	0	0	40	43	41	0	0	0	0	0	0	0.033	0.022	0	0.015	0	0	0.21	0.24	0.22	0	0	0	0	0	0	4	3	0	2	0	0	26	28	26	0	0	0	0	0
25	Vitamin K-dependent protein S OS=Homo sapiens GN=PROS1 PE=1 SV=1	PROS_HUMAN	75	5.37	Homo sapiens	0	0	0	0	0	0	41	38	34	0	0	0	0	0	0	0	0	0	0	0	0	0.36	0.38	0.36	0	0	0	0	0	0	0	0	0	0	0	0	20	20	19	0	0	0	0	0
26	Apolipoprotein E OS=Homo sapiens GN=APOE PE=1 SV=1	APOE_HUMAN	36	5.42	Homo sapiens	0	0	0	0	0	0	29	33	29	0	2	0	0	0	0	0	0	0	0	0	0	0.43	0.64	0.57	0	0.079	0	0	0	0	0	0	0	0	0	0	14	19	18	0	2	0	0	0
27	Apolipoprotein A-I OS=Homo sapiens GN=APOA1 PE=1 SV=1	APOA1_HUMAN	31	5.5	Homo sapiens	0	3	0	0	0	0	31	35	35	0	2	2	0	0	0	0	0.12	0	0	0	0	0.55	0.59	0.69	0	0.09	0.09	0	0	0	0	3	0	0	0	0	19	22	24	0	2	2	0	0
28	Thrombospondin-1 OS=Homo sapiens GN=THBS1 PE=1 SV=2	TSP1_HUMAN	129	4.51	Homo sapiens	0	0	0	0	0	0	6	7	10	0	0	0	0	0	0	0	0	0	0	0	0	0.072	0.083	0.11	0	0	0	0	0	0	0	0	0	0	0	0	6	7	9	0	0	0	0	0
29	CD5 antigen-like OS=Homo sapiens GN=CD5L PE=1 SV=1	CD5L_HUMAN	38	5.15	Homo sapiens	3	3	4	6	8	7	14	13	16	2	3	2	5	6	4	0.066	0.066	0.089	0.22	0.24	0.25	0.36	0.35	0.37	0.066	0.066	0.066	0.14	0.19	0.14	2	2	3	5	6	6	9	8	9	2	2	2	4	6
30	Apolipoprotein C-III OS=Homo sapiens GN=APOC3 PE=1 SV=1	APOC3_HUMAN	11	5.04	Homo sapiens	0	0	0	0	0	0	27	22	29	0	0	0	0	0	0	0	0	0	0	0	0	0.48	0.56	0.48	0	0	0	0	0	0	0	0	0	0	0	0	3	4	4	0	0	0	0	0
31	Cartilage oligomeric matrix protein OS=Homo sapiens GN=COMP PE=1 SV=2	COMP_HUMAN	83	4.16	Homo sapiens	0	0	0	0	0	0	26	30	34	0	0	0	0	0	0	0	0	0	0	0	0	0.37	0.42	0.5	0	0	0	0	0	0	0	0	0	0	0	0	17	20	24	0	0	0	0	0
32	Ceruloplasmin OS=Homo sapiens GN=CP PE=1 SV=1	CERU_HUMAN	122	5.5	Homo sapiens	0	0	0	0	0	0	25	31	30	0	0	0	0	0	0	0	0	0	0	0	0	0.23	0.27	0.26	0	0	0	0	0	0	0	0	0	0	0	0	18	21	21	0	0	0	0	0
33	Serum paraoxonase/arylesterase 1 OS=Homo sapiens GN=PON1 PE=1 SV=3	PON1_HUMAN	40	4.89	Homo sapiens	0	0	0	0	0	0	31	31	32	0	0	0	0	0	0	0	0	0	0	0	0	0.44	0.55	0.46	0	0	0	0	0	0	0	0	0	0	0	0	9	11	10	0	0	0	0	0
34	Hornerin OS=Homo sapiens GN=HRNR PE=1 SV=2	HORN_HUMAN	282	10.24	Homo sapiens	0	0	0	16	15	17	0	0	0	8	12	11	0	0	2	0	0	0	0.074	0.073	0.087	0	0	0	0.036	0.061	0.054	0	0	0.014	0	0	0	13	13	15	0	0	0	6	10	9	0	0
35	Fibrinogen alpha chain OS=Homo sapiens GN=FGA PE=1 SV=2	FIBA_HUMAN	95	5.87	Homo sapiens	0	0	0	0	0	0	29	31	30	4	4	3	0	0	0	0	0	0	0	0	0	0.25	0.28	0.29	0.031	0.046	0.031	0	0	0	0	0	0	0	0	0	19	20	21	2	3	2	0	0
36	Clusterin OS=Homo sapiens GN=CLU PE=1 SV=1	CLUS_HUMAN	52	6.21	Homo sapiens	0	0	0	0	0	0	30	26	25	0	0	0	0	0	0	0	0	0	0	0	0	0.33	0.25	0.23	0	0	0	0	0	0	0	0	0	0	0	0	16	13	12	0	0	0	0	0
37	Kininogen-1 OS=Homo sapiens GN=KNG1 PE=1 SV=2	KNG1_HUMAN	72	6.8	Homo sapiens	0	0	0	0	0	0	36	31	30	0	0	0	0	0	0	0	0	0	0	0	0	0.28	0.3	0.27	0	0	0	0	0	0	0	0	0	0	0	0	17	18	17	0	0	0	0	0
38	Plasminogen OS=Homo sapiens GN=PLG PE=1 SV=2	PLMN_HUMAN	91	7.25	Homo sapiens	0	0	0	0	0	0	26	24	20	3	2	5	0	0	0	0	0	0	0	0	0	0.32	0.33	0.28	0.056	0.033	0.068	0	0	0	0	0	0	0	0	0	18	19	14	2	2	4	0	0
39	Keratin, type I cytoskeletal 14 OS=Homo sapiens GN=KRT14 PE=1 SV=4	K1C14_HUMAN	52	4.81	Homo sapiens	2	0	2	8	7	7	6	7	4	6	10	10	0	0	0	0.042	0	0.042	0.18	0.14	0.11	0.13	0.15	0.097	0.13	0.17	0.15	0	0	0	2	0	2	7	5	3	4	5	2	5	6	5	0	0
40	Keratin, type II cytoskeletal 2 epidermal OS=Homo sapiens GN=KRT2 PE=1 SV=2	K22E_HUMAN	65	8.17	Homo sapiens	0	0	0	15	12	15	9	8	12	13	11	14	0	0	0	0	0	0	0.22	0.2	0.21	0.17	0.15	0.23	0.22	0.2	0.23	0	0	0	0	0	0	9	8	7	6	5	8	9	7	9	0	0
41	Serotransferrin OS=Homo sapiens GN=TF PE=1 SV=3	TRFE_HUMAN	77	7.13	Homo sapiens	0	0	0	5	4	2	18	21	17	2	3	2	0	0	0	0	0	0	0.085	0.066	0.034	0.3	0.32	0.28	0.034	0.056	0.037	0	0	0	0	0	0	5	4	2	18	19	16	2	3	2	0	0
42	Keratin, type II cytoskeletal 6A OS=Homo sapiens GN=KRT6A PE=1 SV=3	K2C6A_HUMAN	60	8.16	Homo sapiens	0	0	0	7	7	5	4	0	0	4	7	5	3	4	4	0	0	0	0.13	0.12	0.076	0.053	0	0	0.076	0.13	0.094	0.055	0.055	0.073	0	0	0	6	5	3	2	0	0	3	6	4	2	2
43	Apolipoprotein(a) OS=Homo sapiens GN=LPA PE=1 SV=1	APOA_HUMAN	501	5.77	Homo sapiens	2	3	4	2	2	0	18	21	18	13	9	12	0	0	0	0.0057	0.0079	0.0048	0.0057	0.0057	0	0.039	0.046	0.034	0.028	0.012	0.028	0	0	0	2	3	2	2	2	0	14	16	12	11	5	11	0	0
44	Inter-alpha-trypsin inhibitor heavy chain H3 OS=Homo sapiens GN=ITIH3 PE=1 SV=2	ITIH3_HUMAN	100	5.49	Homo sapiens	0	0	0	0	0	0	28	27	30	0	0	0	0	0	0	0	0	0	0	0	0	0.15	0.15	0.17	0	0	0	0	0	0	0	0	0	0	0	0	11	11	13	0	0	0	0	0
45	Complement C5 OS=Homo sapiens GN=C5 PE=1 SV=4	CO5_HUMAN	188	6.49	Homo sapiens	0	0	0	0	0	0	24	23	25	0	0	0	0	0	0	0	0	0	0	0	0	0.13	0.12	0.13	0	0	0	0	0	0	0	0	0	0	0	0	20	19	20	0	0	0	0	0
46	Immunoglobulin lambda-like polypeptide 5 OS=Homo sapiens GN=IGLL5 PE=2 SV=2	IGLL5_HUMAN	23	9.05	Homo sapiens	2	4	3	6	6	7	14	8	11	7	5	4	4	3	5	0.12	0.19	0.12	0.14	0.28	0.19	0.27	0.27	0.27	0.15	0.12	0.12	0.19	0.18	0.21	2	4	3	3	4	4	4	4	4	4	3	2	4	3
47	Protein AMBP OS=Homo sapiens GN=AMBP PE=1 SV=1	AMBP_HUMAN	39	6.15	Homo sapiens	0	0	0	0	0	0	27	27	26	0	0	0	0	0	0	0	0	0	0	0	0	0.34	0.34	0.34	0	0	0	0	0	0	0	0	0	0	0	0	11	11	10	0	0	0	0	0
48	Fibronectin OS=Homo sapiens GN=FN1 PE=1 SV=4	FINC_HUMAN	263	5.45	Homo sapiens	0	0	0	0	0	0	28	28	23	0	0	0	0	0	0	0	0	0	0	0	0	0.13	0.12	0.11	0	0	0	0	0	0	0	0	0	0	0	0	22	21	19	0	0	0	0	0
49	Coagulation factor IX OS=Homo sapiens GN=F9 PE=1 SV=2	FA9_HUMAN	52	5.16	Homo sapiens	0	0	0	0	0	0	20	18	21	0	0	0	0	0	0	0	0	0	0	0	0	0.31	0.31	0.31	0	0	0	0	0	0	0	0	0	0	0	0	10	10	10	0	0	0	0	0
50	Apolipoprotein A-IV OS=Homo sapiens GN=APOA4 PE=1 SV=3	APOA4_HUMAN	45	5.05	Homo sapiens	0	0	0	0	0	0	20	17	15	0	0	0	0	0	0	0	0	0	0	0	0	0.39	0.42	0.36	0	0	0	0	0	0	0	0	0	0	0	0	14	14	12	0	0	0	0	0
51	Complement component C9 OS=Homo sapiens GN=C9 PE=1 SV=2	CO9_HUMAN	63	5.27	Homo sapiens	0	0	0	0	0	0	12	9	11	0	0	0	0	0	0	0	0	0	0	0	0	0.24	0.2	0.24	0	0	0	0	0	0	0	0	0	0	0	0	9	8	9	0	0	0	0	0
52	Complement C1s subcomponent OS=Homo sapiens GN=C1S PE=1 SV=1	C1S_HUMAN	77	4.59	Homo sapiens	0	0	0	0	0	0	19	18	18	0	0	0	0	0	0	0	0	0	0	0	0	0.22	0.22	0.24	0	0	0	0	0	0	0	0	0	0	0	0	13	13	13	0	0	0	0	0
53	Alpha-1-antitrypsin OS=Homo sapiens GN=SERPINA1 PE=1 SV=3	A1AT_HUMAN	47	5.31	Homo sapiens	0	0	0	0	0	0	19	23	18	0	0	0	0	0	0	0	0	0	0	0	0	0.28	0.36	0.34	0	0	0	0	0	0	0	0	0	0	0	0	9	13	11	0	0	0	0	0
54	Keratin, type II cytoskeletal 5 OS=Homo sapiens GN=KRT5 PE=1 SV=3	K2C5_HUMAN	62	7.91	Homo sapiens	0	0	0	9	8	9	7	0	5	6	7	6	0	0	0	0	0	0	0.14	0.12	0.14	0.095	0	0.059	0.1	0.1	0.1	0	0	0	0	0	0	6	5	6	4	0	2	4	4	4	0	0
55	Alpha-1-antichymotrypsin OS=Homo sapiens GN=SERPINA3 PE=1 SV=2	AACT_HUMAN	48	5.19	Homo sapiens	0	0	0	0	0	0	19	15	20	0	0	0	0	0	0	0	0	0	0	0	0	0.29	0.32	0.36	0	0	0	0	0	0	0	0	0	0	0	0	11	11	13	0	0	0	0	0
56	Ig alpha-1 chain C region OS=Homo sapiens GN=IGHA1 PE=1 SV=2	IGHA1_HUMAN	38	6.49	Homo sapiens	0	0	2	5	5	3	12	9	10	0	0	3	2	2	0	0	0	0.054	0.16	0.16	0.11	0.22	0.16	0.18	0	0	0.096	0.048	0.048	0	0	0	2	5	5	3	7	5	6	0	0	3	2	2
57	Coagulation factor X OS=Homo sapiens GN=F10 PE=1 SV=2	FA10_HUMAN	55	5.74	Homo sapiens	0	0	0	0	0	0	15	14	16	0	0	0	0	0	0	0	0	0	0	0	0	0.22	0.21	0.23	0	0	0	0	0	0	0	0	0	0	0	0	9	9	10	0	0	0	0	0
58	Ig gamma-3 chain C region OS=Homo sapiens GN=IGHG3 PE=1 SV=2	IGHG3_HUMAN	41	7.95	Homo sapiens	0	0	16	0	0	0	34	33	31	0	0	30	0	0	0	0	0	0.24	0	0	0	0.37	0.37	0.32	0	0	0.27	0	0	0	0	0	2	0	0	0	3	3	3	0	0	2	0	0
59	C-reactive protein OS=Homo sapiens GN=CRP PE=1 SV=1	CRP_HUMAN	25	5.32	Homo sapiens	0	0	0	0	0	0	5	4	4	0	0	0	0	0	0	0	0	0	0	0	0	0.16	0.17	0.16	0	0	0	0	0	0	0	0	0	0	0	0	4	4	4	0	0	0	0	0
60	Histidine-rich glycoprotein OS=Homo sapiens GN=HRG PE=1 SV=1	HRG_HUMAN	60	7.52	Homo sapiens	0	0	0	0	0	0	15	14	17	0	0	0	0	0	0	0	0	0	0	0	0	0.26	0.26	0.26	0	0	0	0	0	0	0	0	0	0	0	0	11	11	11	0	0	0	0	0
61	Complement C1q subcomponent subunit C OS=Homo sapiens GN=C1QC PE=1 SV=3	C1QC_HUMAN	26	8.58	Homo sapiens	0	0	0	2	0	2	6	7	6	0	3	2	2	0	3	0	0	0	0.12	0	0.12	0.25	0.25	0.2	0	0.12	0.12	0.12	0	0.12	0	0	0	2	0	2	5	5	4	0	2	2	2	0
62	Heparin cofactor 2 OS=Homo sapiens GN=SERPIND1 PE=1 SV=3	HEP2_HUMAN	57	6.89	Homo sapiens	0	0	0	0	0	0	11	15	11	0	0	0	0	0	0	0	0	0	0	0	0	0.17	0.2	0.19	0	0	0	0	0	0	0	0	0	0	0	0	8	10	9	0	0	0	0	0
63	Immunoglobulin J chain OS=Homo sapiens GN=IGJ PE=1 SV=4	IGJ_HUMAN	18	4.87	Homo sapiens	0	0	0	2	2	0	6	7	6	0	0	0	4	4	5	0	0	0	0.12	0.12	0	0.28	0.28	0.28	0	0	0	0.12	0.12	0.12	0	0	0	2	2	0	5	5	5	0	0	0	2	2
64	C4b-binding protein beta chain OS=Homo sapiens GN=C4BPB PE=1 SV=1	C4BPB_HUMAN	28	4.8	Homo sapiens	0	0	0	0	0	0	12	11	11	0	0	0	0	0	0	0	0	0	0	0	0	0.29	0.29	0.32	0	0	0	0	0	0	0	0	0	0	0	0	6	6	7	0	0	0	0	0
65	Vitamin K-dependent protein C OS=Homo sapiens GN=PROC PE=1 SV=1	PROC_HUMAN	52	6.23	Homo sapiens	0	0	0	0	0	0	10	10	10	0	0	0	0	0	0	0	0	0	0	0	0	0.14	0.14	0.13	0	0	0	0	0	0	0	0	0	0	0	0	5	5	6	0	0	0	0	0
66	Apolipoprotein C-II OS=Homo sapiens GN=APOC2 PE=1 SV=1	APOC2_HUMAN	11	4.36	Homo sapiens	0	0	0	0	0	0	8	11	10	0	0	0	0	0	0	0	0	0	0	0	0	0.43	0.54	0.29	0	0	0	0	0	0	0	0	0	0	0	0	4	5	3	0	0	0	0	0
67	Beta-2-glycoprotein 1 OS=Homo sapiens GN=APOH PE=1 SV=3	APOH_HUMAN	38	8.03	Homo sapiens	0	0	0	0	0	0	0	0	0	0	0	0	0	0	0	0	0	0	0	0	0	0	0	0	0	0	0	0	0	0	0	0	0	0	0	0	0	0	0	0	0	0	0	0
68	Vitamin K-dependent protein Z OS=Homo sapiens GN=PROZ PE=1 SV=2	PROZ_HUMAN	45	5.87	Homo sapiens	0	0	0	0	0	0	14	13	16	0	0	0	0	0	0	0	0	0	0	0	0	0.29	0.29	0.31	0	0	0	0	0	0	0	0	0	0	0	0	8	8	9	0	0	0	0	0
69	Apolipoprotein M OS=Homo sapiens GN=APOM PE=1 SV=2	APOM_HUMAN	21	5.92	Homo sapiens	0	0	0	0	0	0	12	10	8	0	0	0	0	0	0	0	0	0	0	0	0	0.21	0.24	0.23	0	0	0	0	0	0	0	0	0	0	0	0	6	6	5	0	0	0	0	0
70	Keratin, type I cytoskeletal 16 OS=Homo sapiens GN=KRT16 PE=1 SV=4	K1C16_HUMAN	51	4.69	Homo sapiens	0	0	0	8	0	0	0	0	0	0	0	0	0	0	0	0	0	0	0.18	0	0	0	0	0	0	0	0	0	0	0	0	0	0	2	0	0	0	0	0	0	0	0	0	0
71	Alpha-2-HS-glycoprotein OS=Homo sapiens GN=AHSG PE=1 SV=1	FETUA_HUMAN	39	5.52	Homo sapiens	0	0	0	0	0	0	14	13	13	0	0	0	0	0	0	0	0	0	0	0	0	0.26	0.26	0.24	0	0	0	0	0	0	0	0	0	0	0	0	7	8	7	0	0	0	0	0
72	Alpha-1-acid glycoprotein 1 OS=Homo sapiens GN=ORM1 PE=1 SV=1	A1AG1_HUMAN	24	4.66	Homo sapiens	0	0	0	0	0	0	10	9	8	0	0	0	0	0	0	0	0	0	0	0	0	0.29	0.29	0.33	0	0	0	0	0	0	0	0	0	0	0	0	6	6	7	0	0	0	0	0
73	Serum amyloid A-2 protein OS=Homo sapiens GN=SAA2 PE=1 SV=1	SAA2_HUMAN	14	9.48	Homo sapiens	0	0	0	0	0	0	10	9	10	0	0	0	0	0	0	0	0	0	0	0	0	0.36	0.36	0.36	0	0	0	0	0	0	0	0	0	0	0	0	4	4	4	0	0	0	0	0
74	Transthyretin OS=Homo sapiens GN=TTR PE=1 SV=1	TTHY_HUMAN	16	5.58	Homo sapiens	0	0	0	0	0	0	7	8	9	0	0	0	0	0	0	0	0	0	0	0	0	0.29	0.29	0.29	0	0	0	0	0	0	0	0	0	0	0	0	4	4	4	0	0	0	0	0
75	Complement C1r subcomponent OS=Homo sapiens GN=C1R PE=1 SV=2	C1R_HUMAN	80	6.14	Homo sapiens	0	0	0	0	0	0	7	7	8	0	0	0	0	0	0	0	0	0	0	0	0	0.12	0.13	0.14	0	0	0	0	0	0	0	0	0	0	0	0	6	6	7	0	0	0	0	0
76	Properdin OS=Homo sapiens GN=CFP PE=1 SV=2	PROP_HUMAN	51	7.92	Homo sapiens	0	0	0	7	5	4	3	0	0	0	3	0	0	0	0	0	0	0	0.094	0.094	0.098	0.051	0	0	0	0.098	0	0	0	0	0	0	0	4	4	4	2	0	0	0	3	0	0	0
77	Protein Z-dependent protease inhibitor OS=Homo sapiens GN=SERPINA10 PE=1 SV=1	ZPI_HUMAN	51	8.58	Homo sapiens	0	0	0	0	0	0	9	6	6	0	0	0	0	0	0	0	0	0	0	0	0	0.22	0.18	0.19	0	0	0	0	0	0	0	0	0	0	0	0	7	6	6	0	0	0	0	0
78	Coagulation factor V OS=Homo sapiens GN=F5 PE=1 SV=4	FA5_HUMAN	252	5.95	Homo sapiens	0	0	0	0	0	0	5	4	9	0	0	0	0	0	0	0	0	0	0	0	0	0.028	0.021	0.039	0	0	0	0	0	0	0	0	0	0	0	0	5	4	7	0	0	0	0	0
79	Phosphatidylcholine-sterol acyltransferase OS=Homo sapiens GN=LCAT PE=1 SV=1	LCAT_HUMAN	50	6.04	Homo sapiens	0	0	0	0	0	0	5	3	4	0	0	0	0	0	0	0	0	0	0	0	0	0.15	0.095	0.084	0	0	0	0	0	0	0	0	0	0	0	0	4	2	3	0	0	0	0	0
80	Thrombospondin-4 OS=Homo sapiens GN=THBS4 PE=1 SV=2	TSP4_HUMAN	106	4.23	Homo sapiens	0	0	0	0	0	0	8	11	10	0	0	0	0	0	0	0	0	0	0	0	0	0.1	0.12	0.11	0	0	0	0	0	0	0	0	0	0	0	0	5	7	6	0	0	0	0	0
81	Complement component C6 OS=Homo sapiens GN=C6 PE=1 SV=3	CO6_HUMAN	105	6.74	Homo sapiens	0	0	0	0	0	0	8	8	8	0	0	0	0	0	0	0	0	0	0	0	0	0.1	0.1	0.095	0	0	0	0	0	0	0	0	0	0	0	0	7	7	7	0	0	0	0	0
82	Ficolin-3 OS=Homo sapiens GN=FCN3 PE=1 SV=2	FCN3_HUMAN	33	6.66	Homo sapiens	0	0	0	0	0	0	7	9	7	0	0	0	0	2	2	0	0	0	0	0	0	0.21	0.26	0.21	0	0	0	0	0.064	0.064	0	0	0	0	0	0	5	6	5	0	0	0	0	2
83	Complement component C8 alpha chain OS=Homo sapiens GN=C8A PE=1 SV=2	CO8A_HUMAN	65	6.41	Homo sapiens	0	0	0	0	0	0	3	5	4	0	0	0	0	0	0	0	0	0	0	0	0	0.074	0.14	0.11	0	0	0	0	0	0	0	0	0	0	0	0	3	5	4	0	0	0	0	0
84	Hemoglobin subunit beta OS=Homo sapiens GN=HBB PE=1 SV=2	HBB_HUMAN	16	7.32	Homo sapiens	0	0	0	0	0	0	2	5	2	0	2	2	0	0	0	0	0	0	0	0	0	0.22	0.35	0.16	0	0.14	0.14	0	0	0	0	0	0	0	0	0	2	4	2	0	2	2	0	0
85	Keratin, type I cytoskeletal 17 OS=Homo sapiens GN=KRT17 PE=1 SV=2	K1C17_HUMAN	48	4.67	Homo sapiens	0	0	0	0	0	6	0	0	0	0	0	0	0	0	0	0	0	0	0	0	0.1	0	0	0	0	0	0	0	0	0	0	0	0	0	0	2	0	0	0	0	0	0	0	0
86	Ig kappa chain V-III region HIC OS=Homo sapiens PE=1 SV=2	KV313_HUMAN	14	4.85	Homo sapiens	0	0	0	0	0	0	5	6	0	0	0	0	0	2	2	0	0	0	0	0	0	0.26	0.26	0	0	0	0	0	0.26	0.21	0	0	0	0	0	0	2	2	0	0	0	0	0	2
87	Retinol-binding protein 4 OS=Homo sapiens GN=RBP4 PE=1 SV=3	RET4_HUMAN	23	5.85	Homo sapiens	0	0	0	0	0	0	8	9	9	0	0	0	0	0	0	0	0	0	0	0	0	0.45	0.35	0.3	0	0	0	0	0	0	0	0	0	0	0	0	5	5	5	0	0	0	0	0
88	Serum amyloid P-component OS=Homo sapiens GN=APCS PE=1 SV=2	SAMP_HUMAN	25	6.52	Homo sapiens	0	0	0	0	0	0	3	4	2	0	0	0	0	0	0	0	0	0	0	0	0	0.12	0.14	0.1	0	0	0	0	0	0	0	0	0	0	0	0	3	3	2	0	0	0	0	0
89	Ig alpha-2 chain C region OS=Homo sapiens GN=IGHA2 PE=1 SV=3	IGHA2_HUMAN	37	6.02	Homo sapiens	0	0	0	0	0	0	12	10	11	0	0	0	0	0	0	0	0	0	0	0	0	0.19	0.17	0.19	0	0	0	0	0	0	0	0	0	0	0	0	2	2	2	0	0	0	0	0
90	Inter-alpha-trypsin inhibitor heavy chain H4 OS=Homo sapiens GN=ITIH4 PE=1 SV=4	ITIH4_HUMAN	103	6.97	Homo sapiens	0	0	0	0	0	0	8	7	6	0	0	0	0	0	0	0	0	0	0	0	0	0.089	0.073	0.066	0	0	0	0	0	0	0	0	0	0	0	0	8	6	6	0	0	0	0	0
91	Actin, cytoplasmic 1 OS=Homo sapiens GN=ACTB PE=1 SV=1	ACTB_HUMAN	42	5.15	Homo sapiens	0	0	0	0	0	0	0	0	2	0	0	0	0	0	0	0	0	0	0	0	0	0	0	0.069	0	0	0	0	0	0	0	0	0	0	0	0	0	0	2	0	0	0	0	0
92	Apolipoprotein A-II OS=Homo sapiens GN=APOA2 PE=1 SV=1	APOA2_HUMAN	11	6.6	Homo sapiens	0	0	0	0	0	0	4	7	7	0	0	0	0	0	0	0	0	0	0	0	0	0.44	0.46	0.46	0	0	0	0	0	0	0	0	0	0	0	0	3	4	5	0	0	0	0	0
93	Hemoglobin subunit alpha OS=Homo sapiens GN=HBA1 PE=1 SV=2	HBA_HUMAN	15	9.09	Homo sapiens	0	0	0	0	0	0	0	0	0	0	0	3	0	0	0	0	0	0	0	0	0	0	0	0	0	0	0.17	0	0	0	0	0	0	0	0	0	0	0	0	0	0	2	0	0
94	Alpha-1B-glycoprotein OS=Homo sapiens GN=A1BG PE=1 SV=4	A1BG_HUMAN	54	5.71	Homo sapiens	0	0	0	0	0	0	8	7	6	0	0	0	0	0	0	0	0	0	0	0	0	0.24	0.15	0.15	0	0	0	0	0	0	0	0	0	0	0	0	8	6	6	0	0	0	0	0
95	Filamin-A OS=Homo sapiens GN=FLNA PE=1 SV=4	FLNA_HUMAN	281	5.95	Homo sapiens	0	0	0	4	3	3	0	0	0	4	5	3	0	0	0	0	0	0	0.018	0.013	0.0098	0	0	0	0.018	0.02	0.011	0	0	0	0	0	0	3	3	2	0	0	0	3	3	2	0	0
96	Lumican OS=Homo sapiens GN=LUM PE=1 SV=2	LUM_HUMAN	38	6.6	Homo sapiens	0	0	0	0	0	0	5	7	6	0	0	0	0	0	0	0	0	0	0	0	0	0.21	0.21	0.21	0	0	0	0	0	0	0	0	0	0	0	0	5	5	5	0	0	0	0	0
97	Mannan-binding lectin serine protease 1 OS=Homo sapiens GN=MASP1 PE=1 SV=3	MASP1_HUMAN	79	5.18	Homo sapiens	0	0	0	0	0	0	9	9	8	0	0	0	0	0	0	0	0	0	0	0	0	0.13	0.14	0.12	0	0	0	0	0	0	0	0	0	0	0	0	6	6	5	0	0	0	0	0
98	Dermcidin OS=Homo sapiens GN=DCD PE=1 SV=2	DCD_HUMAN	11	6.52	Homo sapiens	2	0	0	3	0	0	0	0	0	2	2	0	0	0	0	0.2	0	0	0.21	0	0	0	0	0	0.2	0.2	0	0	0	0	2	0	0	3	0	0	0	0	0	2	2	0	0	0
99	Gelsolin OS=Homo sapiens GN=GSN PE=1 SV=1	GELS_HUMAN	86	6.19	Homo sapiens	0	0	0	0	0	0	5	6	4	0	0	0	0	0	0	0	0	0	0	0	0	0.069	0.069	0.055	0	0	0	0	0	0	0	0	0	0	0	0	4	4	3	0	0	0	0	0
100	Secreted phosphoprotein 24 OS=Homo sapiens GN=SPP2 PE=1 SV=1	SPP24_HUMAN	24	8.46	Homo sapiens	0	0	0	0	0	0	5	5	5	0	0	0	0	0	0	0	0	0	0	0	0	0.12	0.18	0.12	0	0	0	0	0	0	0	0	0	0	0	0	3	4	3	0	0	0	0	0
101	Beta-Ala-His dipeptidase OS=Homo sapiens GN=CNDP1 PE=1 SV=4	CNDP1_HUMAN	57	4.95	Homo sapiens	0	0	0	0	0	0	3	4	3	0	0	0	0	0	0	0	0	0	0	0	0	0.093	0.14	0.079	0	0	0	0	0	0	0	0	0	0	0	0	3	4	3	0	0	0	0	0
102	Complement component C8 beta chain OS=Homo sapiens GN=C8B PE=1 SV=3	CO8B_HUMAN	67	8.17	Homo sapiens	0	0	0	0	0	0	4	2	2	0	0	0	0	0	0	0	0	0	0	0	0	0.069	0.034	0.037	0	0	0	0	0	0	0	0	0	0	0	0	4	2	2	0	0	0	0	0
103	Pigment epithelium-derived factor OS=Homo sapiens GN=SERPINF1 PE=1 SV=4	PEDF_HUMAN	46	6.33	Homo sapiens	0	0	0	0	0	0	6	6	4	0	0	0	0	0	0	0	0	0	0	0	0	0.17	0.16	0.12	0	0	0	0	0	0	0	0	0	0	0	0	6	6	4	0	0	0	0	0
104	Calreticulin OS=Homo sapiens GN=CALR PE=1 SV=1	CALR_HUMAN	48	4.04	Homo sapiens	0	0	0	0	0	0	4	4	2	0	0	0	0	0	0	0	0	0	0	0	0	0.096	0.096	0.067	0	0	0	0	0	0	0	0	0	0	0	0	3	3	2	0	0	0	0	0
105	Hemopexin OS=Homo sapiens GN=HPX PE=1 SV=2	HEMO_HUMAN	52	7.02	Homo sapiens	0	0	0	0	0	0	5	5	6	0	0	0	0	0	0	0	0	0	0	0	0	0.12	0.14	0.14	0	0	0	0	0	0	0	0	0	0	0	0	4	5	5	0	0	0	0	0
106	Complement component C8 gamma chain OS=Homo sapiens GN=C8G PE=1 SV=3	CO8G_HUMAN	22	8.48	Homo sapiens	0	0	0	0	0	0	3	4	4	0	0	0	0	0	0	0	0	0	0	0	0	0.16	0.24	0.24	0	0	0	0	0	0	0	0	0	0	0	0	3	4	4	0	0	0	0	0
107	Tropomyosin alpha-4 chain OS=Homo sapiens GN=TPM4 PE=1 SV=3	TPM4_HUMAN	29	4.36	Homo sapiens	0	0	0	0	0	0	0	0	0	0	0	0	0	0	0	0	0	0	0	0	0	0	0	0	0	0	0	0	0	0	0	0	0	0	0	0	0	0	0	0	0	0	0	0
108	Alpha-2-antiplasmin OS=Homo sapiens GN=SERPINF2 PE=1 SV=3	A2AP_HUMAN	55	6.24	Homo sapiens	0	0	0	0	0	0	6	5	7	0	0	0	0	0	0	0	0	0	0	0	0	0.14	0.14	0.14	0	0	0	0	0	0	0	0	0	0	0	0	4	5	5	0	0	0	0	0
109	Phosphatidylinositol-glycan-specific phospholipase D OS=Homo sapiens GN=GPLD1 PE=1 SV=3	PHLD_HUMAN	92	6.33	Homo sapiens	0	0	0	0	0	0	5	4	7	0	0	0	0	0	0	0	0	0	0	0	0	0.061	0.06	0.1	0	0	0	0	0	0	0	0	0	0	0	0	4	4	6	0	0	0	0	0
110	Antithrombin-III OS=Homo sapiens GN=SERPINC1 PE=1 SV=1	ANT3_HUMAN	53	6.68	Homo sapiens	0	0	0	0	0	0	8	6	6	0	0	0	0	0	0	0	0	0	0	0	0	0.2	0.15	0.15	0	0	0	0	0	0	0	0	0	0	0	0	7	5	5	0	0	0	0	0
111	Desmoplakin OS=Homo sapiens GN=DSP PE=1 SV=3	DESP_HUMAN	332	6.78	Homo sapiens	0	0	0	0	0	0	0	0	0	0	0	0	0	0	0	0	0	0	0	0	0	0	0	0	0	0	0	0	0	0	0	0	0	0	0	0	0	0	0	0	0	0	0	0
112	Angiotensinogen OS=Homo sapiens GN=AGT PE=1 SV=1	ANGT_HUMAN	53	6.27	Homo sapiens	0	0	0	0	0	0	7	6	6	0	0	0	0	0	0	0	0	0	0	0	0	0.099	0.11	0.093	0	0	0	0	0	0	0	0	0	0	0	0	5	5	4	0	0	0	0	0
113	Calmodulin-like protein 5 OS=Homo sapiens GN=CALML5 PE=1 SV=2	CALL5_HUMAN	16	4.05	Homo sapiens	0	0	0	0	0	0	0	0	0	0	0	0	0	0	0	0	0	0	0	0	0	0	0	0	0	0	0	0	0	0	0	0	0	0	0	0	0	0	0	0	0	0	0	0
114	Vitamin D-binding protein OS=Homo sapiens GN=GC PE=1 SV=1	VTDB_HUMAN	53	5.21	Homo sapiens	0	0	0	0	0	0	5	2	2	0	0	0	0	0	0	0	0	0	0	0	0	0.18	0.055	0.061	0	0	0	0	0	0	0	0	0	0	0	0	5	2	2	0	0	0	0	0
115	Ig heavy chain V-III region 23 OS=Homo sapiens GN=IGHV3-23 PE=1 SV=2	HV303_HUMAN	13	8.46	Homo sapiens	0	0	0	0	0	0	2	2	0	0	0	0	3	0	0	0	0	0	0	0	0	0.26	0.26	0	0	0	0	0.22	0	0	0	0	0	0	0	0	2	2	0	0	0	0	3	0
116	Ficolin-2 OS=Homo sapiens GN=FCN2 PE=1 SV=2	FCN2_HUMAN	34	6.77	Homo sapiens	0	0	0	2	2	2	0	0	0	0	0	0	0	0	0	0	0	0	0.077	0.077	0.077	0	0	0	0	0	0	0	0	0	0	0	0	2	2	2	0	0	0	0	0	0	0	0
117	Complement factor H-related protein 1 OS=Homo sapiens GN=CFHR1 PE=1 SV=2	FHR1_HUMAN	38	7.42	Homo sapiens	0	0	0	0	0	0	9	0	7	0	0	0	0	0	0	0	0	0	0	0	0	0.17	0	0.18	0	0	0	0	0	0	0	0	0	0	0	0	3	0	2	0	0	0	0	0
118	Complement C1q subcomponent subunit A OS=Homo sapiens GN=C1QA PE=1 SV=2	C1QA_HUMAN	26	9.45	Homo sapiens	0	0	2	2	2	2	0	0	0	0	0	0	0	0	0	0	0	0.045	0.045	0.045	0.045	0	0	0	0	0	0	0	0	0	0	0	2	2	2	2	0	0	0	0	0	0	0	0
119	Platelet factor 4 OS=Homo sapiens GN=PF4 PE=1 SV=2	PLF4_HUMAN	11	8.78	Homo sapiens	0	0	0	0	2	0	0	0	0	0	0	0	0	0	0	0	0	0	0	0.17	0	0	0	0	0	0	0	0	0	0	0	0	0	0	2	0	0	0	0	0	0	0	0	0
120	Ig heavy chain V-I region V35 OS=Homo sapiens PE=1 SV=1	HV103_HUMAN	13	9.87	Homo sapiens	0	0	0	0	0	0	0	0	0	0	0	0	0	0	0	0	0	0	0	0	0	0	0	0	0	0	0	0	0	0	0	0	0	0	0	0	0	0	0	0	0	0	0	0
121	Ig gamma-4 chain C region OS=Homo sapiens GN=IGHG4 PE=1 SV=1	IGHG4_HUMAN	36	7.41	Homo sapiens	0	0	0	0	0	0	13	21	16	0	0	0	0	0	0	0	0	0	0	0	0	0.34	0.43	0.43	0	0	0	0	0	0	0	0	0	0	0	0	2	3	3	0	0	0	0	0
122	Integrin beta-3 OS=Homo sapiens GN=ITGB3 PE=1 SV=2	ITB3_HUMAN	87	4.85	Homo sapiens	0	0	0	0	0	0	0	0	0	4	2	5	0	0	0	0	0	0	0	0	0	0	0	0	0.047	0.024	0.058	0	0	0	0	0	0	0	0	0	0	0	0	4	2	5	0	0
123	Serum paraoxonase/lactonase 3 OS=Homo sapiens GN=PON3 PE=1 SV=3	PON3_HUMAN	40	5.1	Homo sapiens	0	0	0	0	0	0	0	4	6	0	0	0	0	0	0	0	0	0	0	0	0	0	0.09	0.09	0	0	0	0	0	0	0	0	0	0	0	0	0	2	2	0	0	0	0	0
124	Ig lambda chain V-I region HA OS=Homo sapiens PE=1 SV=1	LV102_HUMAN	12	5.69	Homo sapiens	0	0	0	0	0	0	2	2	0	0	0	0	0	0	0	0	0	0	0	0	0	0.21	0.21	0	0	0	0	0	0	0	0	0	0	0	0	0	2	2	0	0	0	0	0	0
125	Galectin-3-binding protein OS=Homo sapiens GN=LGALS3BP PE=1 SV=1	LG3BP_HUMAN	65	4.9	Homo sapiens	0	0	0	0	0	0	0	0	0	0	0	0	3	2	5	0	0	0	0	0	0	0	0	0	0	0	0	0.051	0.039	0.05	0	0	0	0	0	0	0	0	0	0	0	0	3	2
126	Complement C4-B OS=Homo sapiens GN=C4B PE=1 SV=2	CO4B_HUMAN	193	7.28	Homo sapiens	0	0	0	0	0	0	98	98	96	0	0	0	0	0	0	0	0	0	0	0	0	0.36	0.35	0.33	0	0	0	0	0	0	0	0	0	0	0	0	3	3	3	0	0	0	0	0
127	Complement C1q subcomponent subunit B OS=Homo sapiens GN=C1QB PE=1 SV=3	C1QB_HUMAN	27	8.87	Homo sapiens	0	0	0	0	0	0	2	0	2	0	0	0	0	0	0	0	0	0	0	0	0	0.11	0	0.11	0	0	0	0	0	0	0	0	0	0	0	0	2	0	2	0	0	0	0	0
128	Mannan-binding lectin serine protease 2 OS=Homo sapiens GN=MASP2 PE=1 SV=4	MASP2_HUMAN	76	5.37	Homo sapiens	0	0	0	0	0	0	3	3	5	0	0	0	0	0	0	0	0	0	0	0	0	0.034	0.034	0.034	0	0	0	0	0	0	0	0	0	0	0	0	2	2	2	0	0	0	0	0
129	Alpha-1-acid glycoprotein 2 OS=Homo sapiens GN=ORM2 PE=1 SV=2	A1AG2_HUMAN	24	4.76	Homo sapiens	0	0	0	0	0	0	7	8	7	0	0	0	0	0	0	0	0	0	0	0	0	0.17	0.17	0.21	0	0	0	0	0	0	0	0	0	0	0	0	3	3	3	0	0	0	0	0
130	Complement factor I OS=Homo sapiens GN=CFI PE=1 SV=2	CFAI_HUMAN	66	7.53	Homo sapiens	0	0	0	0	0	0	6	3	5	0	0	0	0	0	0	0	0	0	0	0	0	0.13	0.053	0.11	0	0	0	0	0	0	0	0	0	0	0	0	6	3	5	0	0	0	0	0
131	Endoplasmin OS=Homo sapiens GN=HSP90B1 PE=1 SV=1	ENPL_HUMAN	92	4.48	Homo sapiens	0	0	0	0	0	0	0	0	3	0	0	0	0	0	0	0	0	0	0	0	0	0	0	0.047	0	0	0	0	0	0	0	0	0	0	0	0	0	0	3	0	0	0	0	0
132	Ezrin OS=Homo sapiens GN=EZR PE=1 SV=4	EZRI_HUMAN	69	6.17	Homo sapiens	0	0	0	0	0	0	0	0	0	0	0	0	0	0	0	0	0	0	0	0	0	0	0	0	0	0	0	0	0	0	0	0	0	0	0	0	0	0	0	0	0	0	0	0
133	Ig heavy chain V-III region GA OS=Homo sapiens PE=1 SV=1	HV308_HUMAN	13	10.02	Homo sapiens	0	0	0	0	0	0	0	0	0	0	0	0	0	0	0	0	0	0	0	0	0	0	0	0	0	0	0	0	0	0	0	0	0	0	0	0	0	0	0	0	0	0	0	0
134	Apolipoprotein F OS=Homo sapiens GN=APOF PE=1 SV=2	APOF_HUMAN	35	5.36	Homo sapiens	0	0	0	0	0	0	3	3	4	0	0	0	0	0	0	0	0	0	0	0	0	0.083	0.083	0.083	0	0	0	0	0	0	0	0	0	0	0	0	2	2	2	0	0	0	0	0
135	Haptoglobin-related protein OS=Homo sapiens GN=HPR PE=2 SV=2	HPTR_HUMAN	39	7.11	Homo sapiens	0	0	0	0	0	0	0	21	23	0	0	0	0	0	0	0	0	0	0	0	0	0	0.3	0.35	0	0	0	0	0	0	0	0	0	0	0	0	0	2	2	0	0	0	0	0
136	Nephronectin OS=Homo sapiens GN=NPNT PE=2 SV=3	NPNT_HUMAN	62	8.38	Homo sapiens	0	0	0	0	0	0	0	0	0	0	0	0	0	0	0	0	0	0	0	0	0	0	0	0	0	0	0	0	0	0	0	0	0	0	0	0	0	0	0	0	0	0	0	0
137	Integrin alpha-IIb OS=Homo sapiens GN=ITGA2B PE=1 SV=3	ITA2B_HUMAN	113	5.03	Homo sapiens	0	0	0	0	0	0	0	0	0	0	0	0	0	0	0	0	0	0	0	0	0	0	0	0	0	0	0	0	0	0	0	0	0	0	0	0	0	0	0	0	0	0	0	0
138	Lipopolysaccharide-binding protein OS=Homo sapiens GN=LBP PE=1 SV=3	LBP_HUMAN	53	6.68	Homo sapiens	0	0	0	0	0	0	0	0	0	0	0	0	0	0	0	0	0	0	0	0	0	0	0	0	0	0	0	0	0	0	0	0	0	0	0	0	0	0	0	0	0	0	0	0
139	Sodium/potassium-transporting ATPase subunit alpha-2 OS=Homo sapiens GN=ATP1A2 PE=1 SV=1	AT1A2_HUMAN	112	5.33	Homo sapiens	0	0	0	0	0	0	0	0	0	0	0	0	0	0	0	0	0	0	0	0	0	0	0	0	0	0	0	0	0	0	0	0	0	0	0	0	0	0	0	0	0	0	0	0
140	Lysozyme C OS=Homo sapiens GN=LYZ PE=1 SV=1	LYSC_HUMAN	17	9.35	Homo sapiens	0	0	0	0	0	0	0	0	0	0	0	0	0	0	0	0	0	0	0	0	0	0	0	0	0	0	0	0	0	0	0	0	0	0	0	0	0	0	0	0	0	0	0	0
141	Serum amyloid A-4 protein OS=Homo sapiens GN=SAA4 PE=1 SV=2	SAA4_HUMAN	15	9.38	Homo sapiens	0	0	0	0	0	0	0	0	2	0	0	0	0	0	0	0	0	0	0	0	0	0	0	0.16	0	0	0	0	0	0	0	0	0	0	0	0	0	0	2	0	0	0	0	0
142	Ig lambda-7 chain C region OS=Homo sapiens GN=IGLC7 PE=4 SV=2	LAC7_HUMAN	11	8.48	Homo sapiens	0	0	0	0	0	0	0	0	0	0	0	0	0	0	0	0	0	0	0	0	0	0	0	0	0	0	0	0	0	0	0	0	0	0	0	0	0	0	0	0	0	0	0	0
143	Selenoprotein P OS=Homo sapiens GN=SEPP1 PE=1 SV=3	SEPP1_HUMAN	43	7.92	Homo sapiens	0	0	0	0	0	0	2	2	3	0	0	0	0	0	0	0	0	0	0	0	0	0.06	0.06	0.06	0	0	0	0	0	0	0	0	0	0	0	0	2	2	2	0	0	0	0	0
144	Collectin-11 OS=Homo sapiens GN=COLEC11 PE=1 SV=1	COL11_HUMAN	29	5.06	Homo sapiens	0	0	0	0	0	0	2	2	2	0	0	0	0	0	0	0	0	0	0	0	0	0.1	0.1	0.1	0	0	0	0	0	0	0	0	0	0	0	0	2	2	2	0	0	0	0	0
145	Lipocalin-1 OS=Homo sapiens GN=LCN1 PE=1 SV=1	LCN1_HUMAN	19	5.3	Homo sapiens	0	0	0	0	0	0	0	0	0	0	0	0	0	0	0	0	0	0	0	0	0	0	0	0	0	0	0	0	0	0	0	0	0	0	0	0	0	0	0	0	0	0	0	0
146	Prenylcysteine oxidase 1 OS=Homo sapiens GN=PCYOX1 PE=1 SV=3	PCYOX_HUMAN	57	6.1	Homo sapiens	0	0	0	0	0	0	0	0	0	0	0	3	0	0	0	0	0	0	0	0	0	0	0	0	0	0	0.038	0	0	0	0	0	0	0	0	0	0	0	0	0	0	2	0	0
147	Ig heavy chain V-III region GAL OS=Homo sapiens PE=1 SV=1	HV320_HUMAN	13	8.7	Homo sapiens	0	0	0	0	0	0	0	0	0	0	0	0	0	0	0	0	0	0	0	0	0	0	0	0	0	0	0	0	0	0	0	0	0	0	0	0	0	0	0	0	0	0	0	0
148	Ig lambda chain V-III region LOI OS=Homo sapiens PE=1 SV=1	LV302_HUMAN	12	4.72	Homo sapiens	0	0	0	0	0	0	3	2	0	0	0	0	0	0	0	0	0	0	0	0	0	0.29	0.22	0	0	0	0	0	0	0	0	0	0	0	0	0	3	2	0	0	0	0	0	0
149	Serglycin OS=Homo sapiens GN=SRGN PE=1 SV=3	SRGN_HUMAN	18	4.57	Homo sapiens	0	0	0	0	0	0	0	0	0	0	0	0	0	0	0	0	0	0	0	0	0	0	0	0	0	0	0	0	0	0	0	0	0	0	0	0	0	0	0	0	0	0	0	0
150	Filaggrin-2 OS=Homo sapiens GN=FLG2 PE=1 SV=1	FILA2_HUMAN	248	8.35	Homo sapiens	0	0	0	0	0	0	0	0	0	0	0	0	0	0	0	0	0	0	0	0	0	0	0	0	0	0	0	0	0	0	0	0	0	0	0	0	0	0	0	0	0	0	0	0
151	Keratin, type I cytoskeletal 13 OS=Homo sapiens GN=KRT13 PE=1 SV=4	K1C13_HUMAN	50	4.61	Homo sapiens	0	0	0	0	0	0	0	0	0	0	0	0	0	0	0	0	0	0	0	0	0	0	0	0	0	0	0	0	0	0	0	0	0	0	0	0	0	0	0	0	0	0	0	0
152	Apolipoprotein C-I OS=Homo sapiens GN=APOC1 PE=1 SV=1	APOC1_HUMAN	9	9.17	Homo sapiens	0	0	0	0	0	0	0	0	0	0	0	0	0	0	0	0	0	0	0	0	0	0	0	0	0	0	0	0	0	0	0	0	0	0	0	0	0	0	0	0	0	0	0	0
153	Pre-mRNA-splicing factor CWC25 homolog OS=Homo sapiens GN=CWC25 PE=1 SV=1	CWC25_HUMAN	50	10.9	Homo sapiens	0	0	0	0	0	0	0	0	0	0	0	0	0	0	0	0	0	0	0	0	0	0	0	0	0	0	0	0	0	0	0	0	0	0	0	0	0	0	0	0	0	0	0	0
154	Glutathione peroxidase 3 OS=Homo sapiens GN=GPX3 PE=1 SV=2	GPX3_HUMAN	26	8.29	Homo sapiens	0	0	0	0	0	0	2	2	2	0	0	0	0	0	0	0	0	0	0	0	0	0.12	0.12	0.12	0	0	0	0	0	0	0	0	0	0	0	0	2	2	2	0	0	0	0	0
155	Ig kappa chain V-I region HK102 (Fragment) OS=Homo sapiens GN=IGKV1-5 PE=4 SV=1	KV110_HUMAN	13	8.46	Homo sapiens	0	0	0	0	0	0	0	0	0	0	0	0	0	0	0	0	0	0	0	0	0	0	0	0	0	0	0	0	0	0	0	0	0	0	0	0	0	0	0	0	0	0	0	0
156	Ig heavy chain V-II region ARH-77 OS=Homo sapiens PE=4 SV=1	HV209_HUMAN	16	8.45	Homo sapiens	0	0	0	0	0	0	0	0	0	0	0	0	0	0	0	0	0	0	0	0	0	0	0	0	0	0	0	0	0	0	0	0	0	0	0	0	0	0	0	0	0	0	0	0
157	Erythrocyte band 7 integral membrane protein OS=Homo sapiens GN=STOM PE=1 SV=3	STOM_HUMAN	32	8.07	Homo sapiens	0	0	0	0	0	0	0	0	0	0	0	0	0	0	0	0	0	0	0	0	0	0	0	0	0	0	0	0	0	0	0	0	0	0	0	0	0	0	0	0	0	0	0	0
158	Coagulation factor VII OS=Homo sapiens GN=F7 PE=1 SV=1	FA7_HUMAN	52	7.23	Homo sapiens	0	0	0	0	0	0	2	0	2	0	0	0	0	0	0	0	0	0	0	0	0	0.049	0	0.049	0	0	0	0	0	0	0	0	0	0	0	0	2	0	2	0	0	0	0	0
159	Junction plakoglobin OS=Homo sapiens GN=JUP PE=1 SV=3	PLAK_HUMAN	82	6.05	Homo sapiens	0	0	0	0	0	0	0	0	0	0	0	0	0	0	0	0	0	0	0	0	0	0	0	0	0	0	0	0	0	0	0	0	0	0	0	0	0	0	0	0	0	0	0	0
160	Amyloid beta A4 protein OS=Homo sapiens GN=APP PE=1 SV=3	A4_HUMAN	87	4.45	Homo sapiens	0	0	0	0	0	0	0	0	0	0	0	0	0	0	0	0	0	0	0	0	0	0	0	0	0	0	0	0	0	0	0	0	0	0	0	0	0	0	0	0	0	0	0	0
161	Elongation factor 1-alpha 1 OS=Homo sapiens GN=EEF1A1 PE=1 SV=1	EF1A1_HUMAN	50	9.5	Homo sapiens	0	0	0	0	0	0	0	0	2	0	0	0	0	0	0	0	0	0	0	0	0	0	0	0.043	0	0	0	0	0	0	0	0	0	0	0	0	0	0	2	0	0	0	0	0
162	Aggrecan core protein OS=Homo sapiens GN=ACAN PE=1 SV=2	PGCA_HUMAN	250	3.82	Homo sapiens	0	0	0	0	0	0	2	2	0	0	0	0	0	0	0	0	0	0	0	0	0	0.011	0.011	0	0	0	0	0	0	0	0	0	0	0	0	0	2	2	0	0	0	0	0	0
163	Heat shock 70 kDa protein 1-like OS=Homo sapiens GN=HSPA1L PE=1 SV=2	HS71L_HUMAN	70	5.82	Homo sapiens	0	0	0	0	0	0	2	2	0	0	0	0	0	0	0	0	0	0	0	0	0	0.041	0.041	0	0	0	0	0	0	0	0	0	0	0	0	0	2	2	0	0	0	0	0	0
164	Ig kappa chain V-IV region (Fragment) OS=Homo sapiens GN=IGKV4-1 PE=4 SV=1	KV401_HUMAN	13	4.85	Homo sapiens	0	0	0	0	0	0	0	0	0	0	0	0	0	0	0	0	0	0	0	0	0	0	0	0	0	0	0	0	0	0	0	0	0	0	0	0	0	0	0	0	0	0	0	0
165	Angiopoietin-related protein 6 OS=Homo sapiens GN=ANGPTL6 PE=1 SV=1	ANGL6_HUMAN	52	8.64	Homo sapiens	0	0	0	0	0	0	0	2	3	0	0	0	0	0	0	0	0	0	0	0	0	0	0.062	0.062	0	0	0	0	0	0	0	0	0	0	0	0	0	2	2	0	0	0	0	0
166	Desmocollin-1 OS=Homo sapiens GN=DSC1 PE=1 SV=2	DSC1_HUMAN	100	5.08	Homo sapiens	0	0	0	0	0	0	0	0	0	0	0	0	0	0	0	0	0	0	0	0	0	0	0	0	0	0	0	0	0	0	0	0	0	0	0	0	0	0	0	0	0	0	0	0
167	14-3-3 protein zeta/delta OS=Homo sapiens GN=YWHAZ PE=1 SV=1	1433Z_HUMAN	28	4.43	Homo sapiens	0	0	0	0	0	0	0	0	0	0	0	0	0	0	0	0	0	0	0	0	0	0	0	0	0	0	0	0	0	0	0	0	0	0	0	0	0	0	0	0	0	0	0	0
168	Apolipoprotein L1 OS=Homo sapiens GN=APOL1 PE=1 SV=5	APOL1_HUMAN	44	5.55	Homo sapiens	0	0	0	0	0	0	0	3	2	0	0	0	0	0	0	0	0	0	0	0	0	0	0.083	0.045	0	0	0	0	0	0	0	0	0	0	0	0	0	3	2	0	0	0	0	0
169	Carboxypeptidase N catalytic chain OS=Homo sapiens GN=CPN1 PE=1 SV=1	CBPN_HUMAN	52	7.36	Homo sapiens	0	0	0	0	0	0	0	0	2	0	0	0	0	0	0	0	0	0	0	0	0	0	0	0.061	0	0	0	0	0	0	0	0	0	0	0	0	0	0	2	0	0	0	0	0
170	Complement component C7 OS=Homo sapiens GN=C7 PE=1 SV=2	CO7_HUMAN	94	6.44	Homo sapiens	0	0	0	0	0	0	2	0	2	0	0	0	0	0	0	0	0	0	0	0	0	0.04	0	0.04	0	0	0	0	0	0	0	0	0	0	0	0	2	0	2	0	0	0	0	0
171	Neutrophil defensin 1 OS=Homo sapiens GN=DEFA1 PE=1 SV=1	DEF1_HUMAN	10	7.04	Homo sapiens	0	0	0	0	0	0	0	0	0	0	2	2	0	0	0	0	0	0	0	0	0	0	0	0	0	0.19	0.19	0	0	0	0	0	0	0	0	0	0	0	0	0	2	2	0	0
172	Filaggrin OS=Homo sapiens GN=FLG PE=1 SV=3	FILA_HUMAN	435	9.6	Homo sapiens	0	0	0	0	0	0	0	0	0	0	0	0	0	0	0	0	0	0	0	0	0	0	0	0	0	0	0	0	0	0	0	0	0	0	0	0	0	0	0	0	0	0	0	0
173	Plasma kallikrein OS=Homo sapiens GN=KLKB1 PE=1 SV=1	KLKB1_HUMAN	71	8.26	Homo sapiens	0	0	0	0	0	0	0	2	0	0	0	0	0	0	0	0	0	0	0	0	0	0	0.034	0	0	0	0	0	0	0	0	0	0	0	0	0	0	2	0	0	0	0	0	0
174	Tubulin alpha-4A chain OS=Homo sapiens GN=TUBA4A PE=1 SV=1	TBA4A_HUMAN	50	4.69	Homo sapiens	0	0	0	0	0	0	0	0	0	0	0	0	0	0	0	0	0	0	0	0	0	0	0	0	0	0	0	0	0	0	0	0	0	0	0	0	0	0	0	0	0	0	0	0
175	Extracellular superoxide dismutase [Cu-Zn] OS=Homo sapiens GN=SOD3 PE=1 SV=2	SODE_HUMAN	26	6.59	Homo sapiens	0	0	0	0	0	0	0	0	0	0	0	0	0	0	0	0	0	0	0	0	0	0	0	0	0	0	0	0	0	0	0	0	0	0	0	0	0	0	0	0	0	0	0	0
176	Fibulin-1 OS=Homo sapiens GN=FBLN1 PE=1 SV=4	FBLN1_HUMAN	77	4.86	Homo sapiens	0	0	0	0	0	0	0	0	0	0	0	0	0	0	0	0	0	0	0	0	0	0	0	0	0	0	0	0	0	0	0	0	0	0	0	0	0	0	0	0	0	0	0	0
177	Complement factor B OS=Homo sapiens GN=CFB PE=1 SV=2	CFAB_HUMAN	86	7.07	Homo sapiens	0	0	0	0	0	0	0	0	0	0	0	0	0	0	0	0	0	0	0	0	0	0	0	0	0	0	0	0	0	0	0	0	0	0	0	0	0	0	0	0	0	0	0	0
178	Afamin OS=Homo sapiens GN=AFM PE=1 SV=1	AFAM_HUMAN	69	5.7	Homo sapiens	0	0	0	0	0	0	0	3	2	0	0	0	0	0	0	0	0	0	0	0	0	0	0.047	0.03	0	0	0	0	0	0	0	0	0	0	0	0	0	3	2	0	0	0	0	0
179	Phospholipid transfer protein OS=Homo sapiens GN=PLTP PE=1 SV=1	PLTP_HUMAN	55	7.01	Homo sapiens	0	0	0	0	0	0	0	2	0	0	0	0	0	0	0	0	0	0	0	0	0	0	0.047	0	0	0	0	0	0	0	0	0	0	0	0	0	0	2	0	0	0	0	0	0
180	Desmoglein-1 OS=Homo sapiens GN=DSG1 PE=1 SV=2	DSG1_HUMAN	114	4.66	Homo sapiens	0	0	0	0	0	0	0	0	0	0	0	0	0	0	0	0	0	0	0	0	0	0	0	0	0	0	0	0	0	0	0	0	0	0	0	0	0	0	0	0	0	0	0	0
181	Collectin-10 OS=Homo sapiens GN=COLEC10 PE=2 SV=2	COL10_HUMAN	31	7.39	Homo sapiens	0	0	0	0	0	0	0	0	0	0	0	0	0	0	0	0	0	0	0	0	0	0	0	0	0	0	0	0	0	0	0	0	0	0	0	0	0	0	0	0	0	0	0	0
182	Small proline-rich protein 2A OS=Homo sapiens GN=SPRR2A PE=1 SV=1	SPR2A_HUMAN	8	8.49	Homo sapiens	0	0	0	0	0	0	0	0	0	0	0	0	0	0	0	0	0	0	0	0	0	0	0	0	0	0	0	0	0	0	0	0	0	0	0	0	0	0	0	0	0	0	0	0
183	Glyceraldehyde-3-phosphate dehydrogenase OS=Homo sapiens GN=GAPDH PE=1 SV=3	G3P_HUMAN	36	8.73	Homo sapiens	0	0	0	0	0	0	0	0	0	0	0	0	0	0	0	0	0	0	0	0	0	0	0	0	0	0	0	0	0	0	0	0	0	0	0	0	0	0	0	0	0	0	0	0
184	Keratin, type II cytoskeletal 78 OS=Homo sapiens GN=KRT78 PE=2 SV=2	K2C78_HUMAN	57	5.83	Homo sapiens	0	0	0	0	0	0	0	0	0	0	0	0	0	0	0	0	0	0	0	0	0	0	0	0	0	0	0	0	0	0	0	0	0	0	0	0	0	0	0	0	0	0	0	0
185	Alpha-amylase 1 OS=Homo sapiens GN=AMY1A PE=1 SV=2	AMY1_HUMAN	58	6.92	Homo sapiens	0	0	0	0	0	0	0	0	0	0	0	0	0	0	0	0	0	0	0	0	0	0	0	0	0	0	0	0	0	0	0	0	0	0	0	0	0	0	0	0	0	0	0	0
186	Glucosidase 2 subunit beta OS=Homo sapiens GN=PRKCSH PE=1 SV=2	GLU2B_HUMAN	59	4.05	Homo sapiens	0	0	0	0	0	0	0	0	0	0	0	0	0	0	0	0	0	0	0	0	0	0	0	0	0	0	0	0	0	0	0	0	0	0	0	0	0	0	0	0	0	0	0	0
187	Dickkopf-related protein 3 OS=Homo sapiens GN=DKK3 PE=1 SV=2	DKK3_HUMAN	38	4.3	Homo sapiens	0	0	0	0	0	0	0	0	2	0	0	0	0	0	0	0	0	0	0	0	0	0	0	0.077	0	0	0	0	0	0	0	0	0	0	0	0	0	0	2	0	0	0	0	0
188	Keratin, type II cytoskeletal 4 OS=Homo sapiens GN=KRT4 PE=1 SV=4	K2C4_HUMAN	57	6.55	Homo sapiens	0	0	0	0	0	0	0	0	0	0	0	0	0	0	0	0	0	0	0	0	0	0	0	0	0	0	0	0	0	0	0	0	0	0	0	0	0	0	0	0	0	0	0	0
189	Trypsin-1 OS=Homo sapiens GN=PRSS1 PE=1 SV=1	TRY1_HUMAN	27	6.49	Homo sapiens	0	0	0	0	0	0	0	0	0	0	0	0	0	0	0	0	0	0	0	0	0	0	0	0	0	0	0	0	0	0	0	0	0	0	0	0	0	0	0	0	0	0	0	0
190	Integrin beta-1 OS=Homo sapiens GN=ITGB1 PE=1 SV=2	ITB1_HUMAN	88	5.04	Homo sapiens	0	0	0	0	0	0	0	0	0	0	0	0	0	0	0	0	0	0	0	0	0	0	0	0	0	0	0	0	0	0	0	0	0	0	0	0	0	0	0	0	0	0	0	0
191	Prolactin-inducible protein OS=Homo sapiens GN=PIP PE=1 SV=1	PIP_HUMAN	17	8.18	Homo sapiens	0	0	0	0	0	0	0	0	0	0	0	0	0	0	0	0	0	0	0	0	0	0	0	0	0	0	0	0	0	0	0	0	0	0	0	0	0	0	0	0	0	0	0	0
192	Extracellular glycoprotein lacritin OS=Homo sapiens GN=LACRT PE=1 SV=1	LACRT_HUMAN	14	5.2	Homo sapiens	0	0	0	0	0	0	0	0	0	0	0	0	0	0	0	0	0	0	0	0	0	0	0	0	0	0	0	0	0	0	0	0	0	0	0	0	0	0	0	0	0	0	0	0
193	Suprabasin OS=Homo sapiens GN=SBSN PE=1 SV=2	SBSN_HUMAN	61	7.01	Homo sapiens	0	0	0	0	0	0	0	0	0	0	0	0	0	0	0	0	0	0	0	0	0	0	0	0	0	0	0	0	0	0	0	0	0	0	0	0	0	0	0	0	0	0	0	0
194	Platelet basic protein OS=Homo sapiens GN=PPBP PE=1 SV=3	CXCL7_HUMAN	14	9.07	Homo sapiens	0	0	0	0	0	0	0	0	0	0	0	0	0	0	0	0	0	0	0	0	0	0	0	0	0	0	0	0	0	0	0	0	0	0	0	0	0	0	0	0	0	0	0	0
195	Tubulin beta-1 chain OS=Homo sapiens GN=TUBB1 PE=1 SV=1	TBB1_HUMAN	50	4.82	Homo sapiens	0	0	0	0	0	0	0	0	0	0	0	0	0	0	0	0	0	0	0	0	0	0	0	0	0	0	0	0	0	0	0	0	0	0	0	0	0	0	0	0	0	0	0	0
[truncated: 143 more columns]

## Sheet: RPA-Pancreas
						CHOL
Pancreas tumor						Spectral counts															Spectral counts / MW															RPA%
						CHOL_A			CHOL_B			CHOL_C			CHOL_D			CHOL_E																		4.48629	4.824	4.79449	10.0059	9.28585	8.79042	48.8143	51.8896	52.2293	9.28174	9.6062	10.2199	5.92315	5.42336
#	Identified Proteins (195)	Accession Number	Molecular Weight	pI	Taxonomy	2016-11-16_CHOLPC_pancreas_A_01	2016-11-16_CHOLPC_pancreas_A_02	2016-11-16_CHOLPC_pancreas_A_03	2016-11-16_CHOLPC_pancreas_B_01	2016-11-16_CHOLPC_pancreas_B_02	2016-11-16_CHOLPC_pancreas_B_03	2016-11-16_DOTAP_DOPE_pancreas_C_01	2016-11-16_DOTAP_DOPE_pancreas_C_02	2016-11-16_DOTAP_DOPE_pancreas_C_03	2016-11-16_CHOLPC_pancreas_D_01	2016-11-16_CHOLPC_pancreas_D_02	2016-11-16_CHOLPC_pancreas_D_03	2016-11-16_CHOLPC_pancreas_E_01	2016-11-16_CHOLPC_pancreas_E_02	2016-11-16_CHOLPC_pancreas_E_03	2016-11-16_CHOLPC_pancreas_A_01	2016-11-16_CHOLPC_pancreas_A_02	2016-11-16_CHOLPC_pancreas_A_03	2016-11-16_CHOLPC_pancreas_B_01	2016-11-16_CHOLPC_pancreas_B_02	2016-11-16_CHOLPC_pancreas_B_03	2016-11-16_DOTAP_DOPE_pancreas_C_01	2016-11-16_DOTAP_DOPE_pancreas_C_02	2016-11-16_DOTAP_DOPE_pancreas_C_03	2016-11-16_CHOLPC_pancreas_D_01	2016-11-16_CHOLPC_pancreas_D_02	2016-11-16_CHOLPC_pancreas_D_03	2016-11-16_CHOLPC_pancreas_E_01	2016-11-16_CHOLPC_pancreas_E_02	2016-11-16_CHOLPC_pancreas_E_03	2016-11-16_CHOLPC_pancreas_A_01	2016-11-16_CHOLPC_pancreas_A_02	2016-11-16_CHOLPC_pancreas_A_03	2016-11-16_CHOLPC_pancreas_B_01	2016-11-16_CHOLPC_pancreas_B_02	2016-11-16_CHOLPC_pancreas_B_03	2016-11-16_DOTAP_DOPE_pancreas_C_01	2016-11-16_DOTAP_DOPE_pancreas_C_02	2016-11-16_DOTAP_DOPE_pancreas_C_03	2016-11-16_CHOLPC_pancreas_D_01	2016-11-16_CHOLPC_pancreas_D_02	2016-11-16_CHOLPC_pancreas_D_03	2016-11-16_CHOLPC_pancreas_E_01	2016-11-16_CHOLPC_pancreas_E_02
1	Apolipoprotein B-100 OS=Homo sapiens GN=APOB PE=1 SV=2	APOB_HUMAN	516	7.04	Homo sapiens	19	15	19	36	42	34	255	245	250	78	69	70	7	8	7	0.0368217	0.0290698	0.0368217	0.0697674	0.0813953	0.0658915	0.494186	0.474806	0.484496	0.151163	0.133721	0.135659	0.0135659	0.0155039	0.0135659	0.0082076	0.00602606	0.00768001	0.00697262	0.00876552	0.00749582	0.0101238	0.00915032	0.00927634	0.016286	0.0139203	0.013274	0.00229032	0.00285872
2	Vitronectin OS=Homo sapiens GN=VTN PE=1 SV=1	VTNC_HUMAN	54	5.54	Homo sapiens	12	0	0	0	0	0	198	230	235	0	0	0	0	0	0	0.222222	0	0	0	0	0	3.66667	4.25926	4.35185	0	0	0	0	0	0	0.0495336	0	0	0	0	0	0.0751146	0.0820831	0.0833221	0	0	0	0	0
3	Complement C3 OS=Homo sapiens GN=C3 PE=1 SV=2	CO3_HUMAN	187	6.34	Homo sapiens	17	13	14	19	22	19	189	188	195	29	25	28	17	18	18	0.0909091	0.0695187	0.0748663	0.101604	0.117647	0.101604	1.0107	1.00535	1.04278	0.15508	0.13369	0.149733	0.0909091	0.0962567	0.0962567	0.0202637	0.014411	0.0156151	0.0101544	0.0126695	0.0115585	0.0207049	0.0193747	0.0199655	0.0167081	0.013917	0.0146511	0.0153481	0.0177485
4	Ig gamma-1 chain C region OS=Homo sapiens GN=IGHG1 PE=1 SV=1	IGHG1_HUMAN	36	8.31	Homo sapiens	20	22	21	26	24	25	43	50	41	37	43	42	19	16	20	0.555556	0.611111	0.583333	0.722222	0.666667	0.694444	1.19444	1.38889	1.13889	1.02778	1.19444	1.16667	0.527778	0.444444	0.555556	0.123834	0.126681	0.121668	0.0721795	0.0717938	0.0790001	0.0244691	0.0267662	0.0218056	0.110731	0.124341	0.114156	0.0891042	0.08195
5	Ig mu chain C region OS=Homo sapiens GN=IGHM PE=1 SV=3	IGHM_HUMAN	49	6.77	Homo sapiens	23	30	29	34	35	40	55	50	48	17	17	20	54	59	55	0.469388	0.612245	0.591837	0.693878	0.714286	0.816327	1.12245	1.02041	0.979592	0.346939	0.346939	0.408163	1.10204	1.20408	1.12245	0.104627	0.126916	0.123441	0.0693468	0.0769219	0.0928654	0.0229943	0.019665	0.0187556	0.0373786	0.0361161	0.0399381	0.186056	0.222017
6	Serum albumin OS=Homo sapiens GN=ALB PE=1 SV=2	ALBU_HUMAN	69	6.21	Homo sapiens	15	19	18	15	17	18	76	76	79	14	17	15	12	11	15	0.217391	0.275362	0.26087	0.217391	0.246377	0.26087	1.10145	1.10145	1.14493	0.202899	0.246377	0.217391	0.173913	0.15942	0.217391	0.0484568	0.0570817	0.0544103	0.0217263	0.0265325	0.0296766	0.0225641	0.0212268	0.0219212	0.02186	0.0256477	0.0212714	0.0293616	0.0293951
7	C4b-binding protein alpha chain OS=Homo sapiens GN=C4BPA PE=1 SV=2	C4BPA_HUMAN	67	7.31	Homo sapiens	6	5	6	8	5	5	87	88	89	7	5	5	5	2	5	0.0895522	0.0746269	0.0895522	0.119403	0.0746269	0.0746269	1.29851	1.31343	1.32836	0.104478	0.0746269	0.0746269	0.0746269	0.0298507	0.0746269	0.0199613	0.0154699	0.0186782	0.0119332	0.00803662	0.00848956	0.0266009	0.0253121	0.0254332	0.0112563	0.00776861	0.00730211	0.0125992	0.0055041
8	Keratin, type II cytoskeletal 1 OS=Homo sapiens GN=KRT1 PE=1 SV=6	K2C1_HUMAN	66	8.33	Homo sapiens	6	5	8	31	27	30	36	35	32	31	30	30	15	14	12	0.0909091	0.0757576	0.121212	0.469697	0.409091	0.454545	0.545455	0.530303	0.484848	0.469697	0.454545	0.454545	0.227273	0.212121	0.181818	0.0202637	0.0157043	0.0252816	0.0469419	0.0440553	0.0517092	0.0111741	0.0102198	0.00928308	0.0506044	0.0473179	0.0444765	0.0383702	0.0391125
9	Complement C4-A OS=Homo sapiens GN=C4A PE=1 SV=2	CO4A_HUMAN	193	7.08	Homo sapiens	5	6	7	11	8	10	95	96	95	7	5	6	5	5	5	0.0259067	0.0310881	0.0362694	0.0569948	0.0414508	0.0518135	0.492228	0.497409	0.492228	0.0362694	0.0259067	0.0310881	0.0259067	0.0259067	0.0259067	0.00577464	0.00644445	0.00756482	0.00569611	0.00446386	0.00589431	0.0100837	0.00958592	0.00942437	0.00390761	0.00269688	0.00304192	0.00437381	0.00477688
10	Prothrombin OS=Homo sapiens GN=F2 PE=1 SV=2	THRB_HUMAN	70	5.7	Homo sapiens	0	0	0	0	0	0	108	111	115	0	0	0	0	0	0	0	0	0	0	0	0	1.54286	1.58571	1.64286	0	0	0	0	0	0	0	0	0	0	0	0	0.0316066	0.0305594	0.0314547	0	0	0	0	0
11	Keratin, type I cytoskeletal 9 OS=Homo sapiens GN=KRT9 PE=1 SV=3	K1C9_HUMAN	62	4.89	Homo sapiens	9	7	8	20	17	17	17	16	20	21	24	20	8	8	10	0.145161	0.112903	0.129032	0.322581	0.274194	0.274194	0.274194	0.258065	0.322581	0.33871	0.387097	0.322581	0.129032	0.129032	0.16129	0.0323566	0.0234045	0.0269126	0.032239	0.0295281	0.0311923	0.00561707	0.00497334	0.00617624	0.036492	0.0402965	0.031564	0.0217844	0.0237919
12	Apolipoprotein D OS=Homo sapiens GN=APOD PE=1 SV=1	APOD_HUMAN	21	4.79	Homo sapiens	8	9	6	14	17	10	48	42	42	20	16	21	0	0	2	0.380952	0.428571	0.285714	0.666667	0.809524	0.47619	2.28571	2	2	0.952381	0.761905	1	0	0	0.0952381	0.0849148	0.0888414	0.0595923	0.0666273	0.0871782	0.0541715	0.0468247	0.0385434	0.0382927	0.102608	0.0793138	0.0978483	0	0
13	Fibrinogen beta chain OS=Homo sapiens GN=FGB PE=1 SV=2	FIBB_HUMAN	56	8.38	Homo sapiens	0	0	0	5	5	6	64	65	72	13	16	13	0	0	0	0	0	0	0.0892857	0.0892857	0.107143	1.14286	1.16071	1.28571	0.232143	0.285714	0.232143	0	0	0	0	0	0	0.0089233	0.00961524	0.0121886	0.0234123	0.0223689	0.0246167	0.0250107	0.0297427	0.0227148	0	0
14	Ig kappa chain C region OS=Homo sapiens GN=IGKC PE=1 SV=1	IGKC_HUMAN	12	5.68	Homo sapiens	10	11	11	18	20	15	17	16	20	12	11	9	14	11	6	0.833333	0.916667	0.916667	1.5	1.66667	1.25	1.41667	1.33333	1.66667	1	0.916667	0.75	1.16667	0.916667	0.5	0.185751	0.190022	0.191192	0.149911	0.179485	0.1422	0.0290215	0.0256956	0.0319106	0.107738	0.0954244	0.0733862	0.196967	0.169022
15	Hyaluronan-binding protein 2 OS=Homo sapiens GN=HABP2 PE=1 SV=1	HABP2_HUMAN	63	6.52	Homo sapiens	0	0	0	0	0	0	53	49	61	0	0	0	0	0	0	0	0	0	0	0	0	0.84127	0.777778	0.968254	0	0	0	0	0	0	0	0	0	0	0	0	0.0172341	0.0149891	0.0185385	0	0	0	0	0
16	Complement factor H OS=Homo sapiens GN=CFH PE=1 SV=4	CFAH_HUMAN	139	6.59	Homo sapiens	0	3	3	0	0	0	58	56	54	2	0	3	0	0	0	0	0.0215827	0.0215827	0	0	0	0.417266	0.402878	0.388489	0.0143885	0	0.0215827	0	0	0	0	0.00447403	0.00450157	0	0	0	0.00854803	0.00776413	0.00743815	0.00155019	0	0.00211183	0	0
17	Keratin, type I cytoskeletal 10 OS=Homo sapiens GN=KRT10 PE=1 SV=6	K1C10_HUMAN	59	4.88	Homo sapiens	3	2	3	12	10	12	15	16	19	10	16	13	6	8	6	0.0508475	0.0338983	0.0508475	0.20339	0.169492	0.20339	0.254237	0.271186	0.322034	0.169492	0.271186	0.220339	0.101695	0.135593	0.101695	0.011334	0.007027	0.0106054	0.020327	0.0182527	0.0231377	0.00520825	0.00522622	0.00616578	0.0182608	0.0282303	0.0215598	0.017169	0.0250017
18	Inter-alpha-trypsin inhibitor heavy chain H2 OS=Homo sapiens GN=ITIH2 PE=1 SV=2	ITIH2_HUMAN	106	6.85	Homo sapiens	0	0	0	0	0	0	53	61	59	0	0	0	0	0	0	0	0	0	0	0	0	0.5	0.575472	0.556604	0	0	0	0	0	0	0	0	0	0	0	0	0.0102429	0.0110903	0.0106569	0	0	0	0	0
19	Inter-alpha-trypsin inhibitor heavy chain H1 OS=Homo sapiens GN=ITIH1 PE=1 SV=3	ITIH1_HUMAN	101	6.78	Homo sapiens	0	0	0	0	0	0	56	60	62	0	0	0	0	0	0	0	0	0	0	0	0	0.554455	0.594059	0.613861	0	0	0	0	0	0	0	0	0	0	0	0	0.0113585	0.0114485	0.0117532	0	0	0	0	0
20	Haptoglobin OS=Homo sapiens GN=HP PE=1 SV=1	HPT_HUMAN	45	6.56	Homo sapiens	2	3	3	3	0	0	39	48	50	5	4	2	0	3	2	0.0444444	0.0666667	0.0666667	0.0666667	0	0	0.866667	1.06667	1.11111	0.111111	0.0888889	0.0444444	0	0.0666667	0.0444444	0.00990672	0.0138198	0.0139049	0.00666273	0	0	0.0177543	0.0205565	0.0212737	0.0119709	0.00925328	0.00434881	0	0.0122925
21	Ig lambda-2 chain C regions OS=Homo sapiens GN=IGLC2 PE=1 SV=1	LAC2_HUMAN	11	7.34	Homo sapiens	9	12	8	21	18	19	0	22	19	21	17	16	11	9	12	0.818182	1.09091	0.727273	1.90909	1.63636	1.72727	0	2	1.72727	1.90909	1.54545	1.45455	1	0.818182	1.09091	0.182374	0.226142	0.151689	0.190796	0.176221	0.196495	0	0.0385434	0.033071	0.205682	0.160881	0.142325	0.168829	0.150862
22	Fibrinogen gamma chain OS=Homo sapiens GN=FGG PE=1 SV=3	FIBG_HUMAN	52	5.32	Homo sapiens	0	0	0	3	3	3	28	33	33	4	5	6	0	0	2	0	0	0	0.0576923	0.0576923	0.0576923	0.538462	0.634615	0.634615	0.0769231	0.0961538	0.115385	0	0	0.0384615	0	0	0	0.00576582	0.00621293	0.00656309	0.0110308	0.0122301	0.0121506	0.00828757	0.0100096	0.0112902	0	0
23	Ig gamma-2 chain C region OS=Homo sapiens GN=IGHG2 PE=1 SV=2	IGHG2_HUMAN	36	7.66	Homo sapiens	0	0	0	18	15	18	21	27	28	27	27	30	11	11	13	0	0	0	0.5	0.416667	0.5	0.583333	0.75	0.777778	0.75	0.75	0.833333	0.305556	0.305556	0.361111	0	0	0	0.0499705	0.0448711	0.0568801	0.01195	0.0144538	0.0148916	0.0808038	0.0780745	0.0815403	0.0515866	0.0563406
24	Alpha-2-macroglobulin OS=Homo sapiens GN=A2M PE=1 SV=3	A2MG_HUMAN	163	6.43	Homo sapiens	4	3	0	2	0	0	40	43	41	0	0	0	0	0	0	0.0245399	0.0184049	0	0.0122699	0	0	0.245399	0.263804	0.251534	0	0	0	0	0	0	0.00546997	0.00381528	0	0.00122627	0	0	0.00502719	0.00508394	0.00481595	0	0	0	0	0
25	Vitamin K-dependent protein S OS=Homo sapiens GN=PROS1 PE=1 SV=1	PROS_HUMAN	75	5.37	Homo sapiens	0	0	0	0	0	0	41	38	34	0	0	0	0	0	0	0	0	0	0	0	0	0.546667	0.506667	0.453333	0	0	0	0	0	0	0	0	0	0	0	0	0.0111989	0.00976432	0.00867968	0	0	0	0	0
26	Apolipoprotein E OS=Homo sapiens GN=APOE PE=1 SV=1	APOE_HUMAN	36	5.42	Homo sapiens	0	0	0	0	0	0	29	33	29	0	2	0	0	0	0	0	0	0	0	0	0	0.805556	0.916667	0.805556	0	0.0555556	0	0	0	0	0	0	0	0	0	0	0.0165024	0.0176657	0.0154235	0	0.0057833	0	0	0
27	Apolipoprotein A-I OS=Homo sapiens GN=APOA1 PE=1 SV=1	APOA1_HUMAN	31	5.5	Homo sapiens	0	3	0	0	0	0	31	35	35	0	2	2	0	0	0	0	0.0967742	0	0	0	0	1	1.12903	1.12903	0	0.0645161	0.0645161	0	0	0	0	0.020061	0	0	0	0	0.0204858	0.0217584	0.0216169	0	0.00671609	0.00631279	0	0
28	Thrombospondin-1 OS=Homo sapiens GN=THBS1 PE=1 SV=2	TSP1_HUMAN	129	4.51	Homo sapiens	0	0	0	0	0	0	6	7	10	0	0	0	0	0	0	0	0	0	0	0	0	0.0465116	0.0542636	0.0775194	0	0	0	0	0	0	0	0	0	0	0	0	0.000952827	0.00104575	0.00148421	0	0	0	0	0
29	CD5 antigen-like OS=Homo sapiens GN=CD5L PE=1 SV=1	CD5L_HUMAN	38	5.15	Homo sapiens	3	3	4	6	8	7	14	13	16	2	3	2	5	6	4	0.0789474	0.0789474	0.105263	0.157895	0.210526	0.184211	0.368421	0.342105	0.421053	0.0526316	0.0789474	0.0526316	0.131579	0.157895	0.105263	0.0175975	0.0163655	0.021955	0.0157801	0.0226717	0.0209558	0.0075474	0.00659294	0.00806162	0.00567044	0.00821837	0.00514991	0.0222143	0.0291138
30	Apolipoprotein C-III OS=Homo sapiens GN=APOC3 PE=1 SV=1	APOC3_HUMAN	11	5.04	Homo sapiens	0	0	0	0	0	0	27	22	29	0	0	0	0	0	0	0	0	0	0	0	0	2.45455	2	2.63636	0	0	0	0	0	0	0	0	0	0	0	0	0.0502833	0.0385434	0.0504768	0	0	0	0	0
31	Cartilage oligomeric matrix protein OS=Homo sapiens GN=COMP PE=1 SV=2	COMP_HUMAN	83	4.16	Homo sapiens	0	0	0	0	0	0	26	30	34	0	0	0	0	0	0	0	0	0	0	0	0	0.313253	0.361446	0.409639	0	0	0	0	0	0	0	0	0	0	0	0	0.00641723	0.00696567	0.00784309	0	0	0	0	0
32	Ceruloplasmin OS=Homo sapiens GN=CP PE=1 SV=1	CERU_HUMAN	122	5.5	Homo sapiens	0	0	0	0	0	0	25	31	30	0	0	0	0	0	0	0	0	0	0	0	0	0.204918	0.254098	0.245902	0	0	0	0	0	0	0	0	0	0	0	0	0.00419791	0.0048969	0.00470812	0	0	0	0	0
33	Serum paraoxonase/arylesterase 1 OS=Homo sapiens GN=PON1 PE=1 SV=3	PON1_HUMAN	40	4.89	Homo sapiens	0	0	0	0	0	0	31	31	32	0	0	0	0	0	0	0	0	0	0	0	0	0.775	0.775	0.8	0	0	0	0	0	0	0	0	0	0	0	0	0.0158765	0.0149356	0.0153171	0	0	0	0	0
34	Hornerin OS=Homo sapiens GN=HRNR PE=1 SV=2	HORN_HUMAN	282	10.24	Homo sapiens	0	0	0	16	15	17	0	0	0	8	12	11	0	0	2	0	0	0	0.0567376	0.0531915	0.0602837	0	0	0	0.0283688	0.0425532	0.0390071	0	0	0.0070922	0	0	0	0.00567041	0.00572823	0.00685788	0	0	0	0.00305641	0.00442976	0.00381678	0	0
35	Fibrinogen alpha chain OS=Homo sapiens GN=FGA PE=1 SV=2	FIBA_HUMAN	95	5.87	Homo sapiens	0	0	0	0	0	0	29	31	30	4	4	3	0	0	0	0	0	0	0	0	0	0.305263	0.326316	0.315789	0.0421053	0.0421053	0.0315789	0	0	0	0	0	0	0	0	0	0.00625356	0.00628865	0.00604622	0.00453636	0.00438313	0.00308995	0	0
36	Clusterin OS=Homo sapiens GN=CLU PE=1 SV=1	CLUS_HUMAN	52	6.21	Homo sapiens	0	0	0	0	0	0	30	26	25	0	0	0	0	0	0	0	0	0	0	0	0	0.576923	0.5	0.480769	0	0	0	0	0	0	0	0	0	0	0	0	0.0118187	0.00963584	0.00920498	0	0	0	0	0
37	Kininogen-1 OS=Homo sapiens GN=KNG1 PE=1 SV=2	KNG1_HUMAN	72	6.8	Homo sapiens	0	0	0	0	0	0	36	31	30	0	0	0	0	0	0	0	0	0	0	0	0	0.5	0.430556	0.416667	0	0	0	0	0	0	0	0	0	0	0	0	0.0102429	0.00829753	0.00797765	0	0	0	0	0
38	Plasminogen OS=Homo sapiens GN=PLG PE=1 SV=2	PLMN_HUMAN	91	7.25	Homo sapiens	0	0	0	0	0	0	26	24	20	3	2	5	0	0	0	0	0	0	0	0	0	0.285714	0.263736	0.21978	0.032967	0.021978	0.0549451	0	0	0	0	0	0	0	0	0	0.00585308	0.00508264	0.00420799	0.00355182	0.0022879	0.00537628	0	0
39	Keratin, type I cytoskeletal 14 OS=Homo sapiens GN=KRT14 PE=1 SV=4	K1C14_HUMAN	52	4.81	Homo sapiens	2	0	2	8	7	7	6	7	4	6	10	10	0	0	0	0.0384615	0	0.0384615	0.153846	0.134615	0.134615	0.115385	0.134615	0.0769231	0.115385	0.192308	0.192308	0	0	0	0.00857312	0	0.00802204	0.0153755	0.0144968	0.0153139	0.00236374	0.00259427	0.0014728	0.0124314	0.0200191	0.018817	0	0
40	Keratin, type II cytoskeletal 2 epidermal OS=Homo sapiens GN=KRT2 PE=1 SV=2	K22E_HUMAN	65	8.17	Homo sapiens	0	0	0	15	12	15	9	8	12	13	11	14	0	0	0	0	0	0	0.230769	0.184615	0.230769	0.138462	0.123077	0.184615	0.2	0.169231	0.215385	0	0	0	0	0	0	0.0230633	0.0198814	0.0262523	0.00283649	0.0023719	0.00353471	0.0215477	0.0176168	0.021075	0	0
41	Serotransferrin OS=Homo sapiens GN=TF PE=1 SV=3	TRFE_HUMAN	77	7.13	Homo sapiens	0	0	0	5	4	2	18	21	17	2	3	2	0	0	0	0	0	0	0.0649351	0.0519481	0.025974	0.233766	0.272727	0.220779	0.025974	0.038961	0.025974	0	0	0	0	0	0	0.00648967	0.00559432	0.00295481	0.00478889	0.00525591	0.00422712	0.0027984	0.00405582	0.00254151	0	0
42	Keratin, type II cytoskeletal 6A OS=Homo sapiens GN=KRT6A PE=1 SV=3	K2C6A_HUMAN	60	8.16	Homo sapiens	0	0	0	7	7	5	4	0	0	4	7	5	3	4	4	0	0	0	0.116667	0.116667	0.0833333	0.0666667	0	0	0.0666667	0.116667	0.0833333	0.05	0.0666667	0.0666667	0	0	0	0.0116598	0.0125639	0.00948001	0.00136572	0	0	0.00718256	0.0121449	0.00815403	0.00844145	0.0122925
43	Apolipoprotein(a) OS=Homo sapiens GN=LPA PE=1 SV=1	APOA_HUMAN	501	5.77	Homo sapiens	2	3	4	2	2	0	18	21	18	13	9	12	0	0	0	0.00399202	0.00598802	0.00798403	0.00399202	0.00399202	0	0.0359281	0.0419162	0.0359281	0.0259481	0.0179641	0.0239521	0	0	0	0.000889825	0.0012413	0.00166525	0.000398966	0.000429903	0	0.000736016	0.000807795	0.000687893	0.00279561	0.00187005	0.00234367	0	0
44	Inter-alpha-trypsin inhibitor heavy chain H3 OS=Homo sapiens GN=ITIH3 PE=1 SV=2	ITIH3_HUMAN	100	5.49	Homo sapiens	0	0	0	0	0	0	28	27	30	0	0	0	0	0	0	0	0	0	0	0	0	0.28	0.27	0.3	0	0	0	0	0	0	0	0	0	0	0	0	0.00573602	0.00520335	0.00574391	0	0	0	0	0
45	Complement C5 OS=Homo sapiens GN=C5 PE=1 SV=4	CO5_HUMAN	188	6.49	Homo sapiens	0	0	0	0	0	0	24	23	25	0	0	0	0	0	0	0	0	0	0	0	0	0.12766	0.12234	0.132979	0	0	0	0	0	0	0	0	0	0	0	0	0.00261521	0.00235771	0.00254606	0	0	0	0	0
46	Immunoglobulin lambda-like polypeptide 5 OS=Homo sapiens GN=IGLL5 PE=2 SV=2	IGLL5_HUMAN	23	9.05	Homo sapiens	2	4	3	6	6	7	14	8	11	7	5	4	4	3	5	0.0869565	0.173913	0.130435	0.26087	0.26087	0.304348	0.608696	0.347826	0.478261	0.304348	0.217391	0.173913	0.173913	0.130435	0.217391	0.0193827	0.0360516	0.0272052	0.0260715	0.0280932	0.0346227	0.0124696	0.00670319	0.00915695	0.03279	0.0226303	0.0170171	0.0293616	0.0240505
47	Protein AMBP OS=Homo sapiens GN=AMBP PE=1 SV=1	AMBP_HUMAN	39	6.15	Homo sapiens	0	0	0	0	0	0	27	27	26	0	0	0	0	0	0	0	0	0	0	0	0	0.692308	0.692308	0.666667	0	0	0	0	0	0	0	0	0	0	0	0	0.0141825	0.0133419	0.0127642	0	0	0	0	0
48	Fibronectin OS=Homo sapiens GN=FN1 PE=1 SV=4	FINC_HUMAN	263	5.45	Homo sapiens	0	0	0	0	0	0	28	28	23	0	0	0	0	0	0	0	0	0	0	0	0	0.106464	0.106464	0.0874525	0	0	0	0	0	0	0	0	0	0	0	0	0.002181	0.00205174	0.0016744	0	0	0	0	0
49	Coagulation factor IX OS=Homo sapiens GN=F9 PE=1 SV=2	FA9_HUMAN	52	5.16	Homo sapiens	0	0	0	0	0	0	20	18	21	0	0	0	0	0	0	0	0	0	0	0	0	0.384615	0.346154	0.403846	0	0	0	0	0	0	0	0	0	0	0	0	0.00787915	0.00667097	0.00773218	0	0	0	0	0
50	Apolipoprotein A-IV OS=Homo sapiens GN=APOA4 PE=1 SV=3	APOA4_HUMAN	45	5.05	Homo sapiens	0	0	0	0	0	0	20	17	15	0	0	0	0	0	0	0	0	0	0	0	0	0.444444	0.377778	0.333333	0	0	0	0	0	0	0	0	0	0	0	0	0.00910479	0.00728041	0.00638212	0	0	0	0	0
51	Complement component C9 OS=Homo sapiens GN=C9 PE=1 SV=2	CO9_HUMAN	63	5.27	Homo sapiens	0	0	0	0	0	0	12	9	11	0	0	0	0	0	0	0	0	0	0	0	0	0.190476	0.142857	0.174603	0	0	0	0	0	0	0	0	0	0	0	0	0.00390205	0.0027531	0.00334301	0	0	0	0	0
52	Complement C1s subcomponent OS=Homo sapiens GN=C1S PE=1 SV=1	C1S_HUMAN	77	4.59	Homo sapiens	0	0	0	0	0	0	19	18	18	0	0	0	0	0	0	0	0	0	0	0	0	0.246753	0.233766	0.233766	0	0	0	0	0	0	0	0	0	0	0	0	0.00505493	0.00450507	0.00447577	0	0	0	0	0
53	Alpha-1-antitrypsin OS=Homo sapiens GN=SERPINA1 PE=1 SV=3	A1AT_HUMAN	47	5.31	Homo sapiens	0	0	0	0	0	0	19	23	18	0	0	0	0	0	0	0	0	0	0	0	0	0.404255	0.489362	0.382979	0	0	0	0	0	0	0	0	0	0	0	0	0.00828149	0.00943082	0.00733265	0	0	0	0	0
54	Keratin, type II cytoskeletal 5 OS=Homo sapiens GN=KRT5 PE=1 SV=3	K2C5_HUMAN	62	7.91	Homo sapiens	0	0	0	9	8	9	7	0	5	6	7	6	0	0	0	0	0	0	0.145161	0.129032	0.145161	0.112903	0	0.0806452	0.0967742	0.112903	0.0967742	0	0	0	0	0	0	0.0145076	0.0138956	0.0165136	0.00231291	0	0.00154406	0.0104263	0.0117532	0.00946919	0	0
55	Alpha-1-antichymotrypsin OS=Homo sapiens GN=SERPINA3 PE=1 SV=2	AACT_HUMAN	48	5.19	Homo sapiens	0	0	0	0	0	0	19	15	20	0	0	0	0	0	0	0	0	0	0	0	0	0.395833	0.3125	0.416667	0	0	0	0	0	0	0	0	0	0	0	0	0.00810896	0.0060224	0.00797765	0	0	0	0	0
56	Ig alpha-1 chain C region OS=Homo sapiens GN=IGHA1 PE=1 SV=2	IGHA1_HUMAN	38	6.49	Homo sapiens	0	0	2	5	5	3	12	9	10	0	0	3	2	2	0	0	0	0.0526316	0.131579	0.131579	0.0789474	0.315789	0.236842	0.263158	0	0	0.0789474	0.0526316	0.0526316	0	0	0	0.0109775	0.0131501	0.0141698	0.00898107	0.0064692	0.00456435	0.00503852	0	0	0.00772487	0.00888573	0.0097046
57	Coagulation factor X OS=Homo sapiens GN=F10 PE=1 SV=2	FA10_HUMAN	55	5.74	Homo sapiens	0	0	0	0	0	0	15	14	16	0	0	0	0	0	0	0	0	0	0	0	0	0.272727	0.254545	0.290909	0	0	0	0	0	0	0	0	0	0	0	0	0.00558703	0.00490552	0.00556985	0	0	0	0	0
58	Ig gamma-3 chain C region OS=Homo sapiens GN=IGHG3 PE=1 SV=2	IGHG3_HUMAN	41	7.95	Homo sapiens	0	0	16	0	0	0	34	33	31	0	0	30	0	0	0	0	0	0.390244	0	0	0	0.829268	0.804878	0.756098	0	0	0.731707	0	0	0	0	0	0.0813943	0	0	0	0.0169882	0.0155114	0.0144765	0	0	0.0715963	0	0
59	C-reactive protein OS=Homo sapiens GN=CRP PE=1 SV=1	CRP_HUMAN	25	5.32	Homo sapiens	0	0	0	0	0	0	5	4	4	0	0	0	0	0	0	0	0	0	0	0	0	0.2	0.16	0.16	0	0	0	0	0	0	0	0	0	0	0	0	0.00409716	0.00308347	0.00306342	0	0	0	0	0
60	Histidine-rich glycoprotein OS=Homo sapiens GN=HRG PE=1 SV=1	HRG_HUMAN	60	7.52	Homo sapiens	0	0	0	0	0	0	15	14	17	0	0	0	0	0	0	0	0	0	0	0	0	0.25	0.233333	0.283333	0	0	0	0	0	0	0	0	0	0	0	0	0.00512145	0.00449673	0.0054248	0	0	0	0	0
61	Complement C1q subcomponent subunit C OS=Homo sapiens GN=C1QC PE=1 SV=3	C1QC_HUMAN	26	8.58	Homo sapiens	0	0	0	2	0	2	6	7	6	0	3	2	2	0	3	0	0	0	0.0769231	0	0.0769231	0.230769	0.269231	0.230769	0	0.115385	0.0769231	0.0769231	0	0.115385	0	0	0	0.00768776	0	0.00875078	0.00472749	0.00518853	0.00441839	0	0.0120115	0.00752679	0.0129868	0
62	Heparin cofactor 2 OS=Homo sapiens GN=SERPIND1 PE=1 SV=3	HEP2_HUMAN	57	6.89	Homo sapiens	0	0	0	0	0	0	11	15	11	0	0	0	0	0	0	0	0	0	0	0	0	0.192982	0.263158	0.192982	0	0	0	0	0	0	0	0	0	0	0	0	0.0039534	0.0050715	0.00369491	0	0	0	0	0
63	Immunoglobulin J chain OS=Homo sapiens GN=IGJ PE=1 SV=4	IGJ_HUMAN	18	4.87	Homo sapiens	0	0	0	2	2	0	6	7	6	0	0	0	4	4	5	0	0	0	0.111111	0.111111	0	0.333333	0.388889	0.333333	0	0	0	0.222222	0.222222	0.277778	0	0	0	0.0111045	0.0119656	0	0.0068286	0.00749454	0.00638212	0	0	0	0.0375175	0.040975
64	C4b-binding protein beta chain OS=Homo sapiens GN=C4BPB PE=1 SV=1	C4BPB_HUMAN	28	4.8	Homo sapiens	0	0	0	0	0	0	12	11	11	0	0	0	0	0	0	0	0	0	0	0	0	0.428571	0.392857	0.392857	0	0	0	0	0	0	0	0	0	0	0	0	0.00877962	0.00757102	0.00752178	0	0	0	0	0
65	Vitamin K-dependent protein C OS=Homo sapiens GN=PROC PE=1 SV=1	PROC_HUMAN	52	6.23	Homo sapiens	0	0	0	0	0	0	10	10	10	0	0	0	0	0	0	0	0	0	0	0	0	0.192308	0.192308	0.192308	0	0	0	0	0	0	0	0	0	0	0	0	0.00393957	0.00370609	0.00368199	0	0	0	0	0
66	Apolipoprotein C-II OS=Homo sapiens GN=APOC2 PE=1 SV=1	APOC2_HUMAN	11	4.36	Homo sapiens	0	0	0	0	0	0	8	11	10	0	0	0	0	0	0	0	0	0	0	0	0	0.727273	1	0.909091	0	0	0	0	0	0	0	0	0	0	0	0	0.0148988	0.0192717	0.0174058	0	0	0	0	0
67	Beta-2-glycoprotein 1 OS=Homo sapiens GN=APOH PE=1 SV=3	APOH_HUMAN	38	8.03	Homo sapiens	0	0	0	0	0	0	0	0	0	0	0	0	0	0	0	0	0	0	0	0	0	0	0	0	0	0	0	0	0	0	0	0	0	0	0	0	0	0	0	0	0	0	0	0
68	Vitamin K-dependent protein Z OS=Homo sapiens GN=PROZ PE=1 SV=2	PROZ_HUMAN	45	5.87	Homo sapiens	0	0	0	0	0	0	14	13	16	0	0	0	0	0	0	0	0	0	0	0	0	0.311111	0.288889	0.355556	0	0	0	0	0	0	0	0	0	0	0	0	0.00637336	0.00556738	0.00680759	0	0	0	0	0
69	Apolipoprotein M OS=Homo sapiens GN=APOM PE=1 SV=2	APOM_HUMAN	21	5.92	Homo sapiens	0	0	0	0	0	0	12	10	8	0	0	0	0	0	0	0	0	0	0	0	0	0.571429	0.47619	0.380952	0	0	0	0	0	0	0	0	0	0	0	0	0.0117062	0.00917699	0.00729385	0	0	0	0	0
70	Keratin, type I cytoskeletal 16 OS=Homo sapiens GN=KRT16 PE=1 SV=4	K1C16_HUMAN	51	4.69	Homo sapiens	0	0	0	8	0	0	0	0	0	0	0	0	0	0	0	0	0	0	0.156863	0	0	0	0	0	0	0	0	0	0	0	0	0	0	0.015677	0	0	0	0	0	0	0	0	0	0
71	Alpha-2-HS-glycoprotein OS=Homo sapiens GN=AHSG PE=1 SV=1	FETUA_HUMAN	39	5.52	Homo sapiens	0	0	0	0	0	0	14	13	13	0	0	0	0	0	0	0	0	0	0	0	0	0.358974	0.333333	0.333333	0	0	0	0	0	0	0	0	0	0	0	0	0.00735387	0.00642389	0.00638212	0	0	0	0	0
72	Alpha-1-acid glycoprotein 1 OS=Homo sapiens GN=ORM1 PE=1 SV=1	A1AG1_HUMAN	24	4.66	Homo sapiens	0	0	0	0	0	0	10	9	8	0	0	0	0	0	0	0	0	0	0	0	0	0.416667	0.375	0.333333	0	0	0	0	0	0	0	0	0	0	0	0	0.00853574	0.00722688	0.00638212	0	0	0	0	0
73	Serum amyloid A-2 protein OS=Homo sapiens GN=SAA2 PE=1 SV=1	SAA2_HUMAN	14	9.48	Homo sapiens	0	0	0	0	0	0	10	9	10	0	0	0	0	0	0	0	0	0	0	0	0	0.714286	0.642857	0.714286	0	0	0	0	0	0	0	0	0	0	0	0	0.0146327	0.0123889	0.013676	0	0	0	0	0
74	Transthyretin OS=Homo sapiens GN=TTR PE=1 SV=1	TTHY_HUMAN	16	5.58	Homo sapiens	0	0	0	0	0	0	7	8	9	0	0	0	0	0	0	0	0	0	0	0	0	0.4375	0.5	0.5625	0	0	0	0	0	0	0	0	0	0	0	0	0.00896253	0.00963584	0.0107698	0	0	0	0	0
75	Complement C1r subcomponent OS=Homo sapiens GN=C1R PE=1 SV=2	C1R_HUMAN	80	6.14	Homo sapiens	0	0	0	0	0	0	7	7	8	0	0	0	0	0	0	0	0	0	0	0	0	0.0875	0.0875	0.1	0	0	0	0	0	0	0	0	0	0	0	0	0.00179251	0.00168627	0.00191464	0	0	0	0	0
76	Properdin OS=Homo sapiens GN=CFP PE=1 SV=2	PROP_HUMAN	51	7.92	Homo sapiens	0	0	0	7	5	4	3	0	0	0	3	0	0	0	0	0	0	0	0.137255	0.0980392	0.0784314	0.0588235	0	0	0	0.0588235	0	0	0	0	0	0	0	0.0137174	0.0105579	0.00892237	0.00120505	0	0	0	0.00612349	0	0	0
77	Protein Z-dependent protease inhibitor OS=Homo sapiens GN=SERPINA10 PE=1 SV=1	ZPI_HUMAN	51	8.58	Homo sapiens	0	0	0	0	0	0	9	6	6	0	0	0	0	0	0	0	0	0	0	0	0	0.176471	0.117647	0.117647	0	0	0	0	0	0	0	0	0	0	0	0	0.00361514	0.00226726	0.00225251	0	0	0	0	0
78	Coagulation factor V OS=Homo sapiens GN=F5 PE=1 SV=4	FA5_HUMAN	252	5.95	Homo sapiens	0	0	0	0	0	0	5	4	9	0	0	0	0	0	0	0	0	0	0	0	0	0.0198413	0.015873	0.0357143	0	0	0	0	0	0	0	0	0	0	0	0	0.000406464	0.0003059	0.000683798	0	0	0	0	0
79	Phosphatidylcholine-sterol acyltransferase OS=Homo sapiens GN=LCAT PE=1 SV=1	LCAT_HUMAN	50	6.04	Homo sapiens	0	0	0	0	0	0	5	3	4	0	0	0	0	0	0	0	0	0	0	0	0	0.1	0.06	0.08	0	0	0	0	0	0	0	0	0	0	0	0	0.00204858	0.0011563	0.00153171	0	0	0	0	0
80	Thrombospondin-4 OS=Homo sapiens GN=THBS4 PE=1 SV=2	TSP4_HUMAN	106	4.23	Homo sapiens	0	0	0	0	0	0	8	11	10	0	0	0	0	0	0	0	0	0	0	0	0	0.0754717	0.103774	0.0943396	0	0	0	0	0	0	0	0	0	0	0	0	0.0015461	0.00199989	0.00180626	0	0	0	0	0
81	Complement component C6 OS=Homo sapiens GN=C6 PE=1 SV=3	CO6_HUMAN	105	6.74	Homo sapiens	0	0	0	0	0	0	8	8	8	0	0	0	0	0	0	0	0	0	0	0	0	0.0761905	0.0761905	0.0761905	0	0	0	0	0	0	0	0	0	0	0	0	0.00156082	0.00146832	0.00145877	0	0	0	0	0
82	Ficolin-3 OS=Homo sapiens GN=FCN3 PE=1 SV=2	FCN3_HUMAN	33	6.66	Homo sapiens	0	0	0	0	0	0	7	9	7	0	0	0	0	2	2	0	0	0	0	0	0	0.212121	0.272727	0.212121	0	0	0	0	0.0606061	0.0606061	0	0	0	0	0	0	0.00434547	0.00525591	0.00406135	0	0	0	0	0.011175
83	Complement component C8 alpha chain OS=Homo sapiens GN=C8A PE=1 SV=2	CO8A_HUMAN	65	6.41	Homo sapiens	0	0	0	0	0	0	3	5	4	0	0	0	0	0	0	0	0	0	0	0	0	0.0461538	0.0769231	0.0615385	0	0	0	0	0	0	0	0	0	0	0	0	0.000945498	0.00148244	0.00117824	0	0	0	0	0
84	Hemoglobin subunit beta OS=Homo sapiens GN=HBB PE=1 SV=2	HBB_HUMAN	16	7.32	Homo sapiens	0	0	0	0	0	0	2	5	2	0	2	2	0	0	0	0	0	0	0	0	0	0.125	0.3125	0.125	0	0.125	0.125	0	0	0	0	0	0	0	0	0	0.00256072	0.0060224	0.00239329	0	0.0130124	0.012231	0	0
85	Keratin, type I cytoskeletal 17 OS=Homo sapiens GN=KRT17 PE=1 SV=2	K1C17_HUMAN	48	4.67	Homo sapiens	0	0	0	0	0	6	0	0	0	0	0	0	0	0	0	0	0	0	0	0	0.125	0	0	0	0	0	0	0	0	0	0	0	0	0	0	0.01422	0	0	0	0	0	0	0	0
86	Ig kappa chain V-III region HIC OS=Homo sapiens PE=1 SV=2	KV313_HUMAN	14	4.85	Homo sapiens	0	0	0	0	0	0	5	6	0	0	0	0	0	2	2	0	0	0	0	0	0	0.357143	0.428571	0	0	0	0	0	0.142857	0.142857	0	0	0	0	0	0	0.00731635	0.00825929	0	0	0	0	0	0.0263411
87	Retinol-binding protein 4 OS=Homo sapiens GN=RBP4 PE=1 SV=3	RET4_HUMAN	23	5.85	Homo sapiens	0	0	0	0	0	0	8	9	9	0	0	0	0	0	0	0	0	0	0	0	0	0.347826	0.391304	0.391304	0	0	0	0	0	0	0	0	0	0	0	0	0.00712549	0.00754109	0.00749205	0	0	0	0	0
88	Serum amyloid P-component OS=Homo sapiens GN=APCS PE=1 SV=2	SAMP_HUMAN	25	6.52	Homo sapiens	0	0	0	0	0	0	3	4	2	0	0	0	0	0	0	0	0	0	0	0	0	0.12	0.16	0.08	0	0	0	0	0	0	0	0	0	0	0	0	0.00245829	0.00308347	0.00153171	0	0	0	0	0
89	Ig alpha-2 chain C region OS=Homo sapiens GN=IGHA2 PE=1 SV=3	IGHA2_HUMAN	37	6.02	Homo sapiens	0	0	0	0	0	0	12	10	11	0	0	0	0	0	0	0	0	0	0	0	0	0.324324	0.27027	0.297297	0	0	0	0	0	0	0	0	0	0	0	0	0.00664404	0.00520856	0.00569216	0	0	0	0	0
90	Inter-alpha-trypsin inhibitor heavy chain H4 OS=Homo sapiens GN=ITIH4 PE=1 SV=4	ITIH4_HUMAN	103	6.97	Homo sapiens	0	0	0	0	0	0	8	7	6	0	0	0	0	0	0	0	0	0	0	0	0	0.0776699	0.0679612	0.0582524	0	0	0	0	0	0	0	0	0	0	0	0	0.00159113	0.00130973	0.00111532	0	0	0	0	0
91	Actin, cytoplasmic 1 OS=Homo sapiens GN=ACTB PE=1 SV=1	ACTB_HUMAN	42	5.15	Homo sapiens	0	0	0	0	0	0	0	0	2	0	0	0	0	0	0	0	0	0	0	0	0	0	0	0.047619	0	0	0	0	0	0	0	0	0	0	0	0	0	0	0.000911731	0	0	0	0	0
92	Apolipoprotein A-II OS=Homo sapiens GN=APOA2 PE=1 SV=1	APOA2_HUMAN	11	6.6	Homo sapiens	0	0	0	0	0	0	4	7	7	0	0	0	0	0	0	0	0	0	0	0	0	0.363636	0.636364	0.636364	0	0	0	0	0	0	0	0	0	0	0	0	0.00744938	0.0122638	0.012184	0	0	0	0	0
93	Hemoglobin subunit alpha OS=Homo sapiens GN=HBA1 PE=1 SV=2	HBA_HUMAN	15	9.09	Homo sapiens	0	0	0	0	0	0	0	0	0	0	0	3	0	0	0	0	0	0	0	0	0	0	0	0	0	0	0.2	0	0	0	0	0	0	0	0	0	0	0	0	0	0	0.0195697	0	0
94	Alpha-1B-glycoprotein OS=Homo sapiens GN=A1BG PE=1 SV=4	A1BG_HUMAN	54	5.71	Homo sapiens	0	0	0	0	0	0	8	7	6	0	0	0	0	0	0	0	0	0	0	0	0	0.148148	0.12963	0.111111	0	0	0	0	0	0	0	0	0	0	0	0	0.00303493	0.00249818	0.00212737	0	0	0	0	0
95	Filamin-A OS=Homo sapiens GN=FLNA PE=1 SV=4	FLNA_HUMAN	281	5.95	Homo sapiens	0	0	0	4	3	3	0	0	0	4	5	3	0	0	0	0	0	0	0.0142349	0.0106762	0.0106762	0	0	0	0.0142349	0.0177936	0.0106762	0	0	0	0	0	0	0.00142265	0.00114972	0.00121452	0	0	0	0.00153364	0.0018523	0.00104464	0	0
96	Lumican OS=Homo sapiens GN=LUM PE=1 SV=2	LUM_HUMAN	38	6.6	Homo sapiens	0	0	0	0	0	0	5	7	6	0	0	0	0	0	0	0	0	0	0	0	0	0.131579	0.184211	0.157895	0	0	0	0	0	0	0	0	0	0	0	0	0.0026955	0.00355005	0.00302311	0	0	0	0	0
97	Mannan-binding lectin serine protease 1 OS=Homo sapiens GN=MASP1 PE=1 SV=3	MASP1_HUMAN	79	5.18	Homo sapiens	0	0	0	0	0	0	9	9	8	0	0	0	0	0	0	0	0	0	0	0	0	0.113924	0.113924	0.101266	0	0	0	0	0	0	0	0	0	0	0	0	0.00233382	0.00219551	0.00193887	0	0	0	0	0
98	Dermcidin OS=Homo sapiens GN=DCD PE=1 SV=2	DCD_HUMAN	11	6.52	Homo sapiens	2	0	0	3	0	0	0	0	0	2	2	0	0	0	0	0.181818	0	0	0.272727	0	0	0	0	0	0.181818	0.181818	0	0	0	0	0.0405275	0	0	0.0272566	0	0	0	0	0	0.0195888	0.0189272	0	0	0
99	Gelsolin OS=Homo sapiens GN=GSN PE=1 SV=1	GELS_HUMAN	86	6.19	Homo sapiens	0	0	0	0	0	0	5	6	4	0	0	0	0	0	0	0	0	0	0	0	0	0.0581395	0.0697674	0.0465116	0	0	0	0	0	0	0	0	0	0	0	0	0.00119103	0.00134454	0.000890528	0	0	0	0	0
100	Secreted phosphoprotein 24 OS=Homo sapiens GN=SPP2 PE=1 SV=1	SPP24_HUMAN	24	8.46	Homo sapiens	0	0	0	0	0	0	5	5	5	0	0	0	0	0	0	0	0	0	0	0	0	0.208333	0.208333	0.208333	0	0	0	0	0	0	0	0	0	0	0	0	0.00426787	0.00401493	0.00398882	0	0	0	0	0
101	Beta-Ala-His dipeptidase OS=Homo sapiens GN=CNDP1 PE=1 SV=4	CNDP1_HUMAN	57	4.95	Homo sapiens	0	0	0	0	0	0	3	4	3	0	0	0	0	0	0	0	0	0	0	0	0	0.0526316	0.0701754	0.0526316	0	0	0	0	0	0	0	0	0	0	0	0	0.0010782	0.0013524	0.0010077	0	0	0	0	0
102	Complement component C8 beta chain OS=Homo sapiens GN=C8B PE=1 SV=3	CO8B_HUMAN	67	8.17	Homo sapiens	0	0	0	0	0	0	4	2	2	0	0	0	0	0	0	0	0	0	0	0	0	0.0597015	0.0298507	0.0298507	0	0	0	0	0	0	0	0	0	0	0	0	0.00122303	0.000575274	0.000571533	0	0	0	0	0
103	Pigment epithelium-derived factor OS=Homo sapiens GN=SERPINF1 PE=1 SV=4	PEDF_HUMAN	46	6.33	Homo sapiens	0	0	0	0	0	0	6	6	4	0	0	0	0	0	0	0	0	0	0	0	0	0.130435	0.130435	0.0869565	0	0	0	0	0	0	0	0	0	0	0	0	0.00267206	0.0025137	0.0016649	0	0	0	0	0
104	Calreticulin OS=Homo sapiens GN=CALR PE=1 SV=1	CALR_HUMAN	48	4.04	Homo sapiens	0	0	0	0	0	0	4	4	2	0	0	0	0	0	0	0	0	0	0	0	0	0.0833333	0.0833333	0.0416667	0	0	0	0	0	0	0	0	0	0	0	0	0.00170715	0.00160597	0.000797765	0	0	0	0	0
105	Hemopexin OS=Homo sapiens GN=HPX PE=1 SV=2	HEMO_HUMAN	52	7.02	Homo sapiens	0	0	0	0	0	0	5	5	6	0	0	0	0	0	0	0	0	0	0	0	0	0.0961538	0.0961538	0.115385	0	0	0	0	0	0	0	0	0	0	0	0	0.00196979	0.00185305	0.0022092	0	0	0	0	0
106	Complement component C8 gamma chain OS=Homo sapiens GN=C8G PE=1 SV=3	CO8G_HUMAN	22	8.48	Homo sapiens	0	0	0	0	0	0	3	4	4	0	0	0	0	0	0	0	0	0	0	0	0	0.136364	0.181818	0.181818	0	0	0	0	0	0	0	0	0	0	0	0	0.00279352	0.00350394	0.00348116	0	0	0	0	0
107	Tropomyosin alpha-4 chain OS=Homo sapiens GN=TPM4 PE=1 SV=3	TPM4_HUMAN	29	4.36	Homo sapiens	0	0	0	0	0	0	0	0	0	0	0	0	0	0	0	0	0	0	0	0	0	0	0	0	0	0	0	0	0	0	0	0	0	0	0	0	0	0	0	0	0	0	0	0
108	Alpha-2-antiplasmin OS=Homo sapiens GN=SERPINF2 PE=1 SV=3	A2AP_HUMAN	55	6.24	Homo sapiens	0	0	0	0	0	0	6	5	7	0	0	0	0	0	0	0	0	0	0	0	0	0.109091	0.0909091	0.127273	0	0	0	0	0	0	0	0	0	0	0	0	0.00223481	0.00175197	0.00243681	0	0	0	0	0
109	Phosphatidylinositol-glycan-specific phospholipase D OS=Homo sapiens GN=GPLD1 PE=1 SV=3	PHLD_HUMAN	92	6.33	Homo sapiens	0	0	0	0	0	0	5	4	7	0	0	0	0	0	0	0	0	0	0	0	0	0.0543478	0.0434783	0.076087	0	0	0	0	0	0	0	0	0	0	0	0	0.00111336	0.000837899	0.00145679	0	0	0	0	0
110	Antithrombin-III OS=Homo sapiens GN=SERPINC1 PE=1 SV=1	ANT3_HUMAN	53	6.68	Homo sapiens	0	0	0	0	0	0	8	6	6	0	0	0	0	0	0	0	0	0	0	0	0	0.150943	0.113208	0.113208	0	0	0	0	0	0	0	0	0	0	0	0	0.00309219	0.0021817	0.00216751	0	0	0	0	0
111	Desmoplakin OS=Homo sapiens GN=DSP PE=1 SV=3	DESP_HUMAN	332	6.78	Homo sapiens	0	0	0	0	0	0	0	0	0	0	0	0	0	0	0	0	0	0	0	0	0	0	0	0	0	0	0	0	0	0	0	0	0	0	0	0	0	0	0	0	0	0	0	0
112	Angiotensinogen OS=Homo sapiens GN=AGT PE=1 SV=1	ANGT_HUMAN	53	6.27	Homo sapiens	0	0	0	0	0	0	7	6	6	0	0	0	0	0	0	0	0	0	0	0	0	0.132075	0.113208	0.113208	0	0	0	0	0	0	0	0	0	0	0	0	0.00270567	0.0021817	0.00216751	0	0	0	0	0
113	Calmodulin-like protein 5 OS=Homo sapiens GN=CALML5 PE=1 SV=2	CALL5_HUMAN	16	4.05	Homo sapiens	0	0	0	0	0	0	0	0	0	0	0	0	0	0	0	0	0	0	0	0	0	0	0	0	0	0	0	0	0	0	0	0	0	0	0	0	0	0	0	0	0	0	0	0
114	Vitamin D-binding protein OS=Homo sapiens GN=GC PE=1 SV=1	VTDB_HUMAN	53	5.21	Homo sapiens	0	0	0	0	0	0	5	2	2	0	0	0	0	0	0	0	0	0	0	0	0	0.0943396	0.0377358	0.0377358	0	0	0	0	0	0	0	0	0	0	0	0	0.00193262	0.000727233	0.000722504	0	0	0	0	0
115	Ig heavy chain V-III region 23 OS=Homo sapiens GN=IGHV3-23 PE=1 SV=2	HV303_HUMAN	13	8.46	Homo sapiens	0	0	0	0	0	0	2	2	0	0	0	0	3	0	0	0	0	0	0	0	0	0.153846	0.153846	0	0	0	0	0.230769	0	0	0	0	0	0	0	0	0.00315166	0.00296487	0	0	0	0	0.0389605	0
116	Ficolin-2 OS=Homo sapiens GN=FCN2 PE=1 SV=2	FCN2_HUMAN	34	6.77	Homo sapiens	0	0	0	2	2	2	0	0	0	0	0	0	0	0	0	0	0	0	0.0588235	0.0588235	0.0588235	0	0	0	0	0	0	0	0	0	0	0	0	0.00587888	0.00633475	0.00669177	0	0	0	0	0	0	0	0
117	Complement factor H-related protein 1 OS=Homo sapiens GN=CFHR1 PE=1 SV=2	FHR1_HUMAN	38	7.42	Homo sapiens	0	0	0	0	0	0	9	0	7	0	0	0	0	0	0	0	0	0	0	0	0	0.236842	0	0.184211	0	0	0	0	0	0	0	0	0	0	0	0	0.0048519	0	0.00352696	0	0	0	0	0
118	Complement C1q subcomponent subunit A OS=Homo sapiens GN=C1QA PE=1 SV=2	C1QA_HUMAN	26	9.45	Homo sapiens	0	0	2	2	2	2	0	0	0	0	0	0	0	0	0	0	0	0.0769231	0.0769231	0.0769231	0.0769231	0	0	0	0	0	0	0	0	0	0	0	0.0160441	0.00768776	0.0082839	0.00875078	0	0	0	0	0	0	0	0
119	Platelet factor 4 OS=Homo sapiens GN=PF4 PE=1 SV=2	PLF4_HUMAN	11	8.78	Homo sapiens	0	0	0	0	2	0	0	0	0	0	0	0	0	0	0	0	0	0	0	0.181818	0	0	0	0	0	0	0	0	0	0	0	0	0	0	0.0195801	0	0	0	0	0	0	0	0	0
120	Ig heavy chain V-I region V35 OS=Homo sapiens PE=1 SV=1	HV103_HUMAN	13	9.87	Homo sapiens	0	0	0	0	0	0	0	0	0	0	0	0	0	0	0	0	0	0	0	0	0	0	0	0	0	0	0	0	0	0	0	0	0	0	0	0	0	0	0	0	0	0	0	0
121	Ig gamma-4 chain C region OS=Homo sapiens GN=IGHG4 PE=1 SV=1	IGHG4_HUMAN	36	7.41	Homo sapiens	0	0	0	0	0	0	13	21	16	0	0	0	0	0	0	0	0	0	0	0	0	0.361111	0.583333	0.444444	0	0	0	0	0	0	0	0	0	0	0	0	0.00739765	0.0112418	0.00850949	0	0	0	0	0
122	Integrin beta-3 OS=Homo sapiens GN=ITGB3 PE=1 SV=2	ITB3_HUMAN	87	4.85	Homo sapiens	0	0	0	0	0	0	0	0	0	4	2	5	0	0	0	0	0	0	0	0	0	0	0	0	0.045977	0.0229885	0.0574713	0	0	0	0	0	0	0	0	0	0	0	0	0.00495349	0.00239309	0.00562347	0	0
123	Serum paraoxonase/lactonase 3 OS=Homo sapiens GN=PON3 PE=1 SV=3	PON3_HUMAN	40	5.1	Homo sapiens	0	0	0	0	0	0	0	4	6	0	0	0	0	0	0	0	0	0	0	0	0	0	0.1	0.15	0	0	0	0	0	0	0	0	0	0	0	0	0	0.00192717	0.00287195	0	0	0	0	0
124	Ig lambda chain V-I region HA OS=Homo sapiens PE=1 SV=1	LV102_HUMAN	12	5.69	Homo sapiens	0	0	0	0	0	0	2	2	0	0	0	0	0	0	0	0	0	0	0	0	0	0.166667	0.166667	0	0	0	0	0	0	0	0	0	0	0	0	0	0.0034143	0.00321195	0	0	0	0	0	0
125	Galectin-3-binding protein OS=Homo sapiens GN=LGALS3BP PE=1 SV=1	LG3BP_HUMAN	65	4.9	Homo sapiens	0	0	0	0	0	0	0	0	0	0	0	0	3	2	5	0	0	0	0	0	0	0	0	0	0	0	0	0.0461538	0.0307692	0.0769231	0	0	0	0	0	0	0	0	0	0	0	0	0.00779211	0.00567346
126	Complement C4-B OS=Homo sapiens GN=C4B PE=1 SV=2	CO4B_HUMAN	193	7.28	Homo sapiens	0	0	0	0	0	0	98	98	96	0	0	0	0	0	0	0	0	0	0	0	0	0.507772	0.507772	0.497409	0	0	0	0	0	0	0	0	0	0	0	0	0.0104021	0.00978562	0.00952358	0	0	0	0	0
127	Complement C1q subcomponent subunit B OS=Homo sapiens GN=C1QB PE=1 SV=3	C1QB_HUMAN	27	8.87	Homo sapiens	0	0	0	0	0	0	2	0	2	0	0	0	0	0	0	0	0	0	0	0	0	0.0740741	0	0.0740741	0	0	0	0	0	0	0	0	0	0	0	0	0.00151747	0	0.00141825	0	0	0	0	0
128	Mannan-binding lectin serine protease 2 OS=Homo sapiens GN=MASP2 PE=1 SV=4	MASP2_HUMAN	76	5.37	Homo sapiens	0	0	0	0	0	0	3	3	5	0	0	0	0	0	0	0	0	0	0	0	0	0.0394737	0.0394737	0.0657895	0	0	0	0	0	0	0	0	0	0	0	0	0.000808649	0.000760724	0.00125963	0	0	0	0	0
129	Alpha-1-acid glycoprotein 2 OS=Homo sapiens GN=ORM2 PE=1 SV=2	A1AG2_HUMAN	24	4.76	Homo sapiens	0	0	0	0	0	0	7	8	7	0	0	0	0	0	0	0	0	0	0	0	0	0.291667	0.333333	0.291667	0	0	0	0	0	0	0	0	0	0	0	0	0.00597502	0.00642389	0.00558435	0	0	0	0	0
130	Complement factor I OS=Homo sapiens GN=CFI PE=1 SV=2	CFAI_HUMAN	66	7.53	Homo sapiens	0	0	0	0	0	0	6	3	5	0	0	0	0	0	0	0	0	0	0	0	0	0.0909091	0.0454545	0.0757576	0	0	0	0	0	0	0	0	0	0	0	0	0.00186234	0.000875986	0.00145048	0	0	0	0	0
131	Endoplasmin OS=Homo sapiens GN=HSP90B1 PE=1 SV=1	ENPL_HUMAN	92	4.48	Homo sapiens	0	0	0	0	0	0	0	0	3	0	0	0	0	0	0	0	0	0	0	0	0	0	0	0.0326087	0	0	0	0	0	0	0	0	0	0	0	0	0	0	0.000624338	0	0	0	0	0
132	Ezrin OS=Homo sapiens GN=EZR PE=1 SV=4	EZRI_HUMAN	69	6.17	Homo sapiens	0	0	0	0	0	0	0	0	0	0	0	0	0	0	0	0	0	0	0	0	0	0	0	0	0	0	0	0	0	0	0	0	0	0	0	0	0	0	0	0	0	0	0	0
133	Ig heavy chain V-III region GA OS=Homo sapiens PE=1 SV=1	HV308_HUMAN	13	10.02	Homo sapiens	0	0	0	0	0	0	0	0	0	0	0	0	0	0	0	0	0	0	0	0	0	0	0	0	0	0	0	0	0	0	0	0	0	0	0	0	0	0	0	0	0	0	0	0
134	Apolipoprotein F OS=Homo sapiens GN=APOF PE=1 SV=2	APOF_HUMAN	35	5.36	Homo sapiens	0	0	0	0	0	0	3	3	4	0	0	0	0	0	0	0	0	0	0	0	0	0.0857143	0.0857143	0.114286	0	0	0	0	0	0	0	0	0	0	0	0	0.00175592	0.00165186	0.00218816	0	0	0	0	0
135	Haptoglobin-related protein OS=Homo sapiens GN=HPR PE=2 SV=2	HPTR_HUMAN	39	7.11	Homo sapiens	0	0	0	0	0	0	0	21	23	0	0	0	0	0	0	0	0	0	0	0	0	0	0.538462	0.589744	0	0	0	0	0	0	0	0	0	0	0	0	0	0.0103771	0.0112914	0	0	0	0	0
136	Nephronectin OS=Homo sapiens GN=NPNT PE=2 SV=3	NPNT_HUMAN	62	8.38	Homo sapiens	0	0	0	0	0	0	0	0	0	0	0	0	0	0	0	0	0	0	0	0	0	0	0	0	0	0	0	0	0	0	0	0	0	0	0	0	0	0	0	0	0	0	0	0
137	Integrin alpha-IIb OS=Homo sapiens GN=ITGA2B PE=1 SV=3	ITA2B_HUMAN	113	5.03	Homo sapiens	0	0	0	0	0	0	0	0	0	0	0	0	0	0	0	0	0	0	0	0	0	0	0	0	0	0	0	0	0	0	0	0	0	0	0	0	0	0	0	0	0	0	0	0
138	Lipopolysaccharide-binding protein OS=Homo sapiens GN=LBP PE=1 SV=3	LBP_HUMAN	53	6.68	Homo sapiens	0	0	0	0	0	0	0	0	0	0	0	0	0	0	0	0	0	0	0	0	0	0	0	0	0	0	0	0	0	0	0	0	0	0	0	0	0	0	0	0	0	0	0	0
139	Sodium/potassium-transporting ATPase subunit alpha-2 OS=Homo sapiens GN=ATP1A2 PE=1 SV=1	AT1A2_HUMAN	112	5.33	Homo sapiens	0	0	0	0	0	0	0	0	0	0	0	0	0	0	0	0	0	0	0	0	0	0	0	0	0	0	0	0	0	0	0	0	0	0	0	0	0	0	0	0	0	0	0	0
140	Lysozyme C OS=Homo sapiens GN=LYZ PE=1 SV=1	LYSC_HUMAN	17	9.35	Homo sapiens	0	0	0	0	0	0	0	0	0	0	0	0	0	0	0	0	0	0	0	0	0	0	0	0	0	0	0	0	0	0	0	0	0	0	0	0	0	0	0	0	0	0	0	0
141	Serum amyloid A-4 protein OS=Homo sapiens GN=SAA4 PE=1 SV=2	SAA4_HUMAN	15	9.38	Homo sapiens	0	0	0	0	0	0	0	0	2	0	0	0	0	0	0	0	0	0	0	0	0	0	0	0.133333	0	0	0	0	0	0	0	0	0	0	0	0	0	0	0.00255285	0	0	0	0	0
142	Ig lambda-7 chain C region OS=Homo sapiens GN=IGLC7 PE=4 SV=2	LAC7_HUMAN	11	8.48	Homo sapiens	0	0	0	0	0	0	0	0	0	0	0	0	0	0	0	0	0	0	0	0	0	0	0	0	0	0	0	0	0	0	0	0	0	0	0	0	0	0	0	0	0	0	0	0
143	Selenoprotein P OS=Homo sapiens GN=SEPP1 PE=1 SV=3	SEPP1_HUMAN	43	7.92	Homo sapiens	0	0	0	0	0	0	2	2	3	0	0	0	0	0	0	0	0	0	0	0	0	0.0465116	0.0465116	0.0697674	0	0	0	0	0	0	0	0	0	0	0	0	0.000952827	0.000896357	0.00133579	0	0	0	0	0
144	Collectin-11 OS=Homo sapiens GN=COLEC11 PE=1 SV=1	COL11_HUMAN	29	5.06	Homo sapiens	0	0	0	0	0	0	2	2	2	0	0	0	0	0	0	0	0	0	0	0	0	0.0689655	0.0689655	0.0689655	0	0	0	0	0	0	0	0	0	0	0	0	0.00141281	0.00132908	0.00132044	0	0	0	0	0
145	Lipocalin-1 OS=Homo sapiens GN=LCN1 PE=1 SV=1	LCN1_HUMAN	19	5.3	Homo sapiens	0	0	0	0	0	0	0	0	0	0	0	0	0	0	0	0	0	0	0	0	0	0	0	0	0	0	0	0	0	0	0	0	0	0	0	0	0	0	0	0	0	0	0	0
146	Prenylcysteine oxidase 1 OS=Homo sapiens GN=PCYOX1 PE=1 SV=3	PCYOX_HUMAN	57	6.1	Homo sapiens	0	0	0	0	0	0	0	0	0	0	0	3	0	0	0	0	0	0	0	0	0	0	0	0	0	0	0.0526316	0	0	0	0	0	0	0	0	0	0	0	0	0	0	0.00514991	0	0
147	Ig heavy chain V-III region GAL OS=Homo sapiens PE=1 SV=1	HV320_HUMAN	13	8.7	Homo sapiens	0	0	0	0	0	0	0	0	0	0	0	0	0	0	0	0	0	0	0	0	0	0	0	0	0	0	0	0	0	0	0	0	0	0	0	0	0	0	0	0	0	0	0	0
148	Ig lambda chain V-III region LOI OS=Homo sapiens PE=1 SV=1	LV302_HUMAN	12	4.72	Homo sapiens	0	0	0	0	0	0	3	2	0	0	0	0	0	0	0	0	0	0	0	0	0	0.25	0.166667	0	0	0	0	0	0	0	0	0	0	0	0	0	0.00512145	0.00321195	0	0	0	0	0	0
149	Serglycin OS=Homo sapiens GN=SRGN PE=1 SV=3	SRGN_HUMAN	18	4.57	Homo sapiens	0	0	0	0	0	0	0	0	0	0	0	0	0	0	0	0	0	0	0	0	0	0	0	0	0	0	0	0	0	0	0	0	0	0	0	0	0	0	0	0	0	0	0	0
150	Filaggrin-2 OS=Homo sapiens GN=FLG2 PE=1 SV=1	FILA2_HUMAN	248	8.35	Homo sapiens	0	0	0	0	0	0	0	0	0	0	0	0	0	0	0	0	0	0	0	0	0	0	0	0	0	0	0	0	0	0	0	0	0	0	0	0	0	0	0	0	0	0	0	0
151	Keratin, type I cytoskeletal 13 OS=Homo sapiens GN=KRT13 PE=1 SV=4	K1C13_HUMAN	50	4.61	Homo sapiens	0	0	0	0	0	0	0	0	0	0	0	0	0	0	0	0	0	0	0	0	0	0	0	0	0	0	0	0	0	0	0	0	0	0	0	0	0	0	0	0	0	0	0	0
152	Apolipoprotein C-I OS=Homo sapiens GN=APOC1 PE=1 SV=1	APOC1_HUMAN	9	9.17	Homo sapiens	0	0	0	0	0	0	0	0	0	0	0	0	0	0	0	0	0	0	0	0	0	0	0	0	0	0	0	0	0	0	0	0	0	0	0	0	0	0	0	0	0	0	0	0
153	Pre-mRNA-splicing factor CWC25 homolog OS=Homo sapiens GN=CWC25 PE=1 SV=1	CWC25_HUMAN	50	10.9	Homo sapiens	0	0	0	0	0	0	0	0	0	0	0	0	0	0	0	0	0	0	0	0	0	0	0	0	0	0	0	0	0	0	0	0	0	0	0	0	0	0	0	0	0	0	0	0
154	Glutathione peroxidase 3 OS=Homo sapiens GN=GPX3 PE=1 SV=2	GPX3_HUMAN	26	8.29	Homo sapiens	0	0	0	0	0	0	2	2	2	0	0	0	0	0	0	0	0	0	0	0	0	0.0769231	0.0769231	0.0769231	0	0	0	0	0	0	0	0	0	0	0	0	0.00157583	0.00148244	0.0014728	0	0	0	0	0
155	Ig kappa chain V-I region HK102 (Fragment) OS=Homo sapiens GN=IGKV1-5 PE=4 SV=1	KV110_HUMAN	13	8.46	Homo sapiens	0	0	0	0	0	0	0	0	0	0	0	0	0	0	0	0	0	0	0	0	0	0	0	0	0	0	0	0	0	0	0	0	0	0	0	0	0	0	0	0	0	0	0	0
156	Ig heavy chain V-II region ARH-77 OS=Homo sapiens PE=4 SV=1	HV209_HUMAN	16	8.45	Homo sapiens	0	0	0	0	0	0	0	0	0	0	0	0	0	0	0	0	0	0	0	0	0	0	0	0	0	0	0	0	0	0	0	0	0	0	0	0	0	0	0	0	0	0	0	0
157	Erythrocyte band 7 integral membrane protein OS=Homo sapiens GN=STOM PE=1 SV=3	STOM_HUMAN	32	8.07	Homo sapiens	0	0	0	0	0	0	0	0	0	0	0	0	0	0	0	0	0	0	0	0	0	0	0	0	0	0	0	0	0	0	0	0	0	0	0	0	0	0	0	0	0	0	0	0
158	Coagulation factor VII OS=Homo sapiens GN=F7 PE=1 SV=1	FA7_HUMAN	52	7.23	Homo sapiens	0	0	0	0	0	0	2	0	2	0	0	0	0	0	0	0	0	0	0	0	0	0.0384615	0	0.0384615	0	0	0	0	0	0	0	0	0	0	0	0	0.000787915	0	0.000736398	0	0	0	0	0
159	Junction plakoglobin OS=Homo sapiens GN=JUP PE=1 SV=3	PLAK_HUMAN	82	6.05	Homo sapiens	0	0	0	0	0	0	0	0	0	0	0	0	0	0	0	0	0	0	0	0	0	0	0	0	0	0	0	0	0	0	0	0	0	0	0	0	0	0	0	0	0	0	0	0
160	Amyloid beta A4 protein OS=Homo sapiens GN=APP PE=1 SV=3	A4_HUMAN	87	4.45	Homo sapiens	0	0	0	0	0	0	0	0	0	0	0	0	0	0	0	0	0	0	0	0	0	0	0	0	0	0	0	0	0	0	0	0	0	0	0	0	0	0	0	0	0	0	0	0
161	Elongation factor 1-alpha 1 OS=Homo sapiens GN=EEF1A1 PE=1 SV=1	EF1A1_HUMAN	50	9.5	Homo sapiens	0	0	0	0	0	0	0	0	2	0	0	0	0	0	0	0	0	0	0	0	0	0	0	0.04	0	0	0	0	0	0	0	0	0	0	0	0	0	0	0.000765854	0	0	0	0	0
162	Aggrecan core protein OS=Homo sapiens GN=ACAN PE=1 SV=2	PGCA_HUMAN	250	3.82	Homo sapiens	0	0	0	0	0	0	2	2	0	0	0	0	0	0	0	0	0	0	0	0	0	0.008	0.008	0	0	0	0	0	0	0	0	0	0	0	0	0	0.000163886	0.000154173	0	0	0	0	0	0
163	Heat shock 70 kDa protein 1-like OS=Homo sapiens GN=HSPA1L PE=1 SV=2	HS71L_HUMAN	70	5.82	Homo sapiens	0	0	0	0	0	0	2	2	0	0	0	0	0	0	0	0	0	0	0	0	0	0.0285714	0.0285714	0	0	0	0	0	0	0	0	0	0	0	0	0	0.000585308	0.00055062	0	0	0	0	0	0
164	Ig kappa chain V-IV region (Fragment) OS=Homo sapiens GN=IGKV4-1 PE=4 SV=1	KV401_HUMAN	13	4.85	Homo sapiens	0	0	0	0	0	0	0	0	0	0	0	0	0	0	0	0	0	0	0	0	0	0	0	0	0	0	0	0	0	0	0	0	0	0	0	0	0	0	0	0	0	0	0	0
165	Angiopoietin-related protein 6 OS=Homo sapiens GN=ANGPTL6 PE=1 SV=1	ANGL6_HUMAN	52	8.64	Homo sapiens	0	0	0	0	0	0	0	2	3	0	0	0	0	0	0	0	0	0	0	0	0	0	0.0384615	0.0576923	0	0	0	0	0	0	0	0	0	0	0	0	0	0.000741219	0.0011046	0	0	0	0	0
166	Desmocollin-1 OS=Homo sapiens GN=DSC1 PE=1 SV=2	DSC1_HUMAN	100	5.08	Homo sapiens	0	0	0	0	0	0	0	0	0	0	0	0	0	0	0	0	0	0	0	0	0	0	0	0	0	0	0	0	0	0	0	0	0	0	0	0	0	0	0	0	0	0	0	0
167	14-3-3 protein zeta/delta OS=Homo sapiens GN=YWHAZ PE=1 SV=1	1433Z_HUMAN	28	4.43	Homo sapiens	0	0	0	0	0	0	0	0	0	0	0	0	0	0	0	0	0	0	0	0	0	0	0	0	0	0	0	0	0	0	0	0	0	0	0	0	0	0	0	0	0	0	0	0
168	Apolipoprotein L1 OS=Homo sapiens GN=APOL1 PE=1 SV=5	APOL1_HUMAN	44	5.55	Homo sapiens	0	0	0	0	0	0	0	3	2	0	0	0	0	0	0	0	0	0	0	0	0	0	0.0681818	0.0454545	0	0	0	0	0	0	0	0	0	0	0	0	0	0.00131398	0.000870289	0	0	0	0	0
169	Carboxypeptidase N catalytic chain OS=Homo sapiens GN=CPN1 PE=1 SV=1	CBPN_HUMAN	52	7.36	Homo sapiens	0	0	0	0	0	0	0	0	2	0	0	0	0	0	0	0	0	0	0	0	0	0	0	0.0384615	0	0	0	0	0	0	0	0	0	0	0	0	0	0	0.000736398	0	0	0	0	0
170	Complement component C7 OS=Homo sapiens GN=C7 PE=1 SV=2	CO7_HUMAN	94	6.44	Homo sapiens	0	0	0	0	0	0	2	0	2	0	0	0	0	0	0	0	0	0	0	0	0	0.0212766	0	0.0212766	0	0	0	0	0	0	0	0	0	0	0	0	0.000435868	0	0.000407369	0	0	0	0	0
171	Neutrophil defensin 1 OS=Homo sapiens GN=DEFA1 PE=1 SV=1	DEF1_HUMAN	10	7.04	Homo sapiens	0	0	0	0	0	0	0	0	0	0	2	2	0	0	0	0	0	0	0	0	0	0	0	0	0	0.2	0.2	0	0	0	0	0	0	0	0	0	0	0	0	0	0.0208199	0.0195697	0	0
172	Filaggrin OS=Homo sapiens GN=FLG PE=1 SV=3	FILA_HUMAN	435	9.6	Homo sapiens	0	0	0	0	0	0	0	0	0	0	0	0	0	0	0	0	0	0	0	0	0	0	0	0	0	0	0	0	0	0	0	0	0	0	0	0	0	0	0	0	0	0	0	0
173	Plasma kallikrein OS=Homo sapiens GN=KLKB1 PE=1 SV=1	KLKB1_HUMAN	71	8.26	Homo sapiens	0	0	0	0	0	0	0	2	0	0	0	0	0	0	0	0	0	0	0	0	0	0	0.028169	0	0	0	0	0	0	0	0	0	0	0	0	0	0	0.000542864	0	0	0	0	0	0
174	Tubulin alpha-4A chain OS=Homo sapiens GN=TUBA4A PE=1 SV=1	TBA4A_HUMAN	50	4.69	Homo sapiens	0	0	0	0	0	0	0	0	0	0	0	0	0	0	0	0	0	0	0	0	0	0	0	0	0	0	0	0	0	0	0	0	0	0	0	0	0	0	0	0	0	0	0	0
175	Extracellular superoxide dismutase [Cu-Zn] OS=Homo sapiens GN=SOD3 PE=1 SV=2	SODE_HUMAN	26	6.59	Homo sapiens	0	0	0	0	0	0	0	0	0	0	0	0	0	0	0	0	0	0	0	0	0	0	0	0	0	0	0	0	0	0	0	0	0	0	0	0	0	0	0	0	0	0	0	0
176	Fibulin-1 OS=Homo sapiens GN=FBLN1 PE=1 SV=4	FBLN1_HUMAN	77	4.86	Homo sapiens	0	0	0	0	0	0	0	0	0	0	0	0	0	0	0	0	0	0	0	0	0	0	0	0	0	0	0	0	0	0	0	0	0	0	0	0	0	0	0	0	0	0	0	0
177	Complement factor B OS=Homo sapiens GN=CFB PE=1 SV=2	CFAB_HUMAN	86	7.07	Homo sapiens	0	0	0	0	0	0	0	0	0	0	0	0	0	0	0	0	0	0	0	0	0	0	0	0	0	0	0	0	0	0	0	0	0	0	0	0	0	0	0	0	0	0	0	0
178	Afamin OS=Homo sapiens GN=AFM PE=1 SV=1	AFAM_HUMAN	69	5.7	Homo sapiens	0	0	0	0	0	0	0	3	2	0	0	0	0	0	0	0	0	0	0	0	0	0	0.0434783	0.0289855	0	0	0	0	0	0	0	0	0	0	0	0	0	0.000837899	0.000554967	0	0	0	0	0
179	Phospholipid transfer protein OS=Homo sapiens GN=PLTP PE=1 SV=1	PLTP_HUMAN	55	7.01	Homo sapiens	0	0	0	0	0	0	0	2	0	0	0	0	0	0	0	0	0	0	0	0	0	0	0.0363636	0	0	0	0	0	0	0	0	0	0	0	0	0	0	0.000700789	0	0	0	0	0	0
180	Desmoglein-1 OS=Homo sapiens GN=DSG1 PE=1 SV=2	DSG1_HUMAN	114	4.66	Homo sapiens	0	0	0	0	0	0	0	0	0	0	0	0	0	0	0	0	0	0	0	0	0	0	0	0	0	0	0	0	0	0	0	0	0	0	0	0	0	0	0	0	0	0	0	0
181	Collectin-10 OS=Homo sapiens GN=COLEC10 PE=2 SV=2	COL10_HUMAN	31	7.39	Homo sapiens	0	0	0	0	0	0	0	0	0	0	0	0	0	0	0	0	0	0	0	0	0	0	0	0	0	0	0	0	0	0	0	0	0	0	0	0	0	0	0	0	0	0	0	0
182	Small proline-rich protein 2A OS=Homo sapiens GN=SPRR2A PE=1 SV=1	SPR2A_HUMAN	8	8.49	Homo sapiens	0	0	0	0	0	0	0	0	0	0	0	0	0	0	0	0	0	0	0	0	0	0	0	0	0	0	0	0	0	0	0	0	0	0	0	0	0	0	0	0	0	0	0	0
183	Glyceraldehyde-3-phosphate dehydrogenase OS=Homo sapiens GN=GAPDH PE=1 SV=3	G3P_HUMAN	36	8.73	Homo sapiens	0	0	0	0	0	0	0	0	0	0	0	0	0	0	0	0	0	0	0	0	0	0	0	0	0	0	0	0	0	0	0	0	0	0	0	0	0	0	0	0	0	0	0	0
184	Keratin, type II cytoskeletal 78 OS=Homo sapiens GN=KRT78 PE=2 SV=2	K2C78_HUMAN	57	5.83	Homo sapiens	0	0	0	0	0	0	0	0	0	0	0	0	0	0	0	0	0	0	0	0	0	0	0	0	0	0	0	0	0	0	0	0	0	0	0	0	0	0	0	0	0	0	0	0
185	Alpha-amylase 1 OS=Homo sapiens GN=AMY1A PE=1 SV=2	AMY1_HUMAN	58	6.92	Homo sapiens	0	0	0	0	0	0	0	0	0	0	0	0	0	0	0	0	0	0	0	0	0	0	0	0	0	0	0	0	0	0	0	0	0	0	0	0	0	0	0	0	0	0	0	0
186	Glucosidase 2 subunit beta OS=Homo sapiens GN=PRKCSH PE=1 SV=2	GLU2B_HUMAN	59	4.05	Homo sapiens	0	0	0	0	0	0	0	0	0	0	0	0	0	0	0	0	0	0	0	0	0	0	0	0	0	0	0	0	0	0	0	0	0	0	0	0	0	0	0	0	0	0	0	0
187	Dickkopf-related protein 3 OS=Homo sapiens GN=DKK3 PE=1 SV=2	DKK3_HUMAN	38	4.3	Homo sapiens	0	0	0	0	0	0	0	0	2	0	0	0	0	0	0	0	0	0	0	0	0	0	0	0.0526316	0	0	0	0	0	0	0	0	0	0	0	0	0	0	0.0010077	0	0	0	0	0
188	Keratin, type II cytoskeletal 4 OS=Homo sapiens GN=KRT4 PE=1 SV=4	K2C4_HUMAN	57	6.55	Homo sapiens	0	0	0	0	0	0	0	0	0	0	0	0	0	0	0	0	0	0	0	0	0	0	0	0	0	0	0	0	0	0	0	0	0	0	0	0	0	0	0	0	0	0	0	0
189	Trypsin-1 OS=Homo sapiens GN=PRSS1 PE=1 SV=1	TRY1_HUMAN	27	6.49	Homo sapiens	0	0	0	0	0	0	0	0	0	0	0	0	0	0	0	0	0	0	0	0	0	0	0	0	0	0	0	0	0	0	0	0	0	0	0	0	0	0	0	0	0	0	0	0
190	Integrin beta-1 OS=Homo sapiens GN=ITGB1 PE=1 SV=2	ITB1_HUMAN	88	5.04	Homo sapiens	0	0	0	0	0	0	0	0	0	0	0	0	0	0	0	0	0	0	0	0	0	0	0	0	0	0	0	0	0	0	0	0	0	0	0	0	0	0	0	0	0	0	0	0
191	Prolactin-inducible protein OS=Homo sapiens GN=PIP PE=1 SV=1	PIP_HUMAN	17	8.18	Homo sapiens	0	0	0	0	0	0	0	0	0	0	0	0	0	0	0	0	0	0	0	0	0	0	0	0	0	0	0	0	0	0	0	0	0	0	0	0	0	0	0	0	0	0	0	0
192	Extracellular glycoprotein lacritin OS=Homo sapiens GN=LACRT PE=1 SV=1	LACRT_HUMAN	14	5.2	Homo sapiens	0	0	0	0	0	0	0	0	0	0	0	0	0	0	0	0	0	0	0	0	0	0	0	0	0	0	0	0	0	0	0	0	0	0	0	0	0	0	0	0	0	0	0	0
193	Suprabasin OS=Homo sapiens GN=SBSN PE=1 SV=2	SBSN_HUMAN	61	7.01	Homo sapiens	0	0	0	0	0	0	0	0	0	0	0	0	0	0	0	0	0	0	0	0	0	0	0	0	0	0	0	0	0	0	0	0	0	0	0	0	0	0	0	0	0	0	0	0
194	Platelet basic protein OS=Homo sapiens GN=PPBP PE=1 SV=3	CXCL7_HUMAN	14	9.07	Homo sapiens	0	0	0	0	0	0	0	0	0	0	0	0	0	0	0	0	0	0	0	0	0	0	0	0	0	0	0	0	0	0	0	0	0	0	0	0	0	0	0	0	0	0	0	0
195	Tubulin beta-1 chain OS=Homo sapiens GN=TUBB1 PE=1 SV=1	TBB1_HUMAN	50	4.82	Homo sapiens	0	0	0	0	0	0	0	0	0	0	0	0	0	0	0	0	0	0	0	0	0	0	0	0	0	0	0	0	0	0	0	0	0	0	0	0	0	0	0	0	0	0	0	0
[truncated: 158 more columns]

## Sheet: MW--Pancreas
						CHOL					DOPG					DOTAP
						4.70159	9.36073	50.9777	9.70261	5.69907	6.49879	7.65273	8.36491	16.8027	22.4171	12.9954	33.1816	50.9743	37.5314	12.4631
#	Identified Proteins (195)	Accession Number	Molecular Weight	pI	Taxonomy	CHOL_A	CHOL_B	CHOL_C	CHOL_D	CHOL_E	DOPG_A	DOPG_B	DOPG_C	DOPG_D	DOPG_E	DOTAP_A	DOTAP_B	DOTAP_C	DOTAP_D	DOTAP_E
1	Apolipoprotein B-100 OS=Homo sapiens GN=APOB PE=1 SV=2	APOB_HUMAN	516	7.04	Homo sapiens	0.00730456	0.00774466	0.00951681	0.0144934	0.00250268	0.00191925	0.00414551	0.00130698	0.00365237	0.0012374	0.00356542	0.00820388	0.00951687	0.00832001	0.00145702
2	Vitronectin OS=Homo sapiens GN=VTN PE=1 SV=1	VTNC_HUMAN	54	5.54	Homo sapiens	0.0165112	0	0.0801733	0	0	0	0.00246609	0.00886199	0.00440859	0.00303864	0.117463	0.0595932	0.08018	0.0862606	0.136442
3	Complement C3 OS=Homo sapiens GN=C3 PE=1 SV=2	CO3_HUMAN	187	6.34	Homo sapiens	0.0167633	0.0114608	0.020015	0.0150921	0.0166116	0.00824132	0.0124284	0.00957532	0.00859684	0.00580795	0.0155295	0.0164463	0.0200156	0.0185767	0.0221767			4	0.00857002	0.00802095	0.0102607	0.0168299	0.00250268	0.00233851	0.00414551	0.00130698	0.00452304	0.00270511	0.00356542	0.008924	0.0102743	0.00954394	0.00145702
4	Ig gamma-1 chain C region OS=Homo sapiens GN=IGHG1 PE=1 SV=1	IGHG1_HUMAN	36	8.31	Homo sapiens	0.124061	0.0743245	0.024347	0.116409	0.0892203	0.0838113	0.0714138	0.0820852	0.135554	0.0881337	0.0191642	0.031157	0.023812	0.0486067	0.0231995			15	0.035023	0.0325897	0.0599	0.0403819	0.0240773	0.0182971	0.024615	0.0159311	0.0163727	0.0154146	0.0336517	0.0490303	0.0599144	0.0541885	0.0357622
5	Ig mu chain C region OS=Homo sapiens GN=IGHM PE=1 SV=3	IGHM_HUMAN	49	6.77	Homo sapiens	0.118328	0.0797114	0.0204716	0.0378109	0.201086	0.0481917	0.0631918	0.105936	0.0356206	0.0568044	0.0246063	0.0223677	0.0204706	0.0117821	0.0668101			28	0.0380149	0.0325897	0.105942	0.0416026	0.0240773	0.0182971	0.024615	0.0165196	0.0206534	0.0215522	0.0669661	0.095358	0.105958	0.0981272	0.0574554
6	Serum albumin OS=Homo sapiens GN=ALB PE=1 SV=2	ALBU_HUMAN	69	6.21	Homo sapiens	0.0533163	0.0259784	0.021904	0.0229263	0.0321865	0.029701	0.0449469	0.0277131	0.0189676	0.0112116	0.0295127	0.0272757	0.0219047	0.0280799	0.0272206			41	0.0380149	0.0325897	0.128826	0.0536678	0.0240773	0.0182971	0.024615	0.0165196	0.0231125	0.0233532	0.0773492	0.119265	0.128844	0.122049	0.0672646
7	C4b-binding protein alpha chain OS=Homo sapiens GN=C4BPA PE=1 SV=2	C4BPA_HUMAN	67	7.31	Homo sapiens	0.0180365	0.00948648	0.0257821	0.00877566	0.0103601	0.00535279	0	0.0196419	0.00385134	0.0113412	0.059531	0.0323626	0.0257827	0.0302409	0.0634267			51	0.0380149	0.0376027	0.191848	0.0567997	0.0240773	0.0182971	0.0353495	0.0206566	0.0251704	0.0254701	0.10921	0.173447	0.191865	0.162289	0.107515
8	Keratin, type II cytoskeletal 1 OS=Homo sapiens GN=KRT1 PE=1 SV=6	K2C1_HUMAN	66	8.33	Homo sapiens	0.0204165	0.0475688	0.0102257	0.0474663	0.0363665	0.0694918	0.0514775	0.0550439	0.0192351	0.0568687	0.0301288	0.0151167	0.0100306	0.0154713	0.0101286			69	0.157342	0.200895	0.289124	0.211875	0.147254	0.247765	0.254746	0.197145	0.0912406	0.224991	0.315394	0.297779	0.28895	0.296574	0.260459
9	Complement C4-A OS=Homo sapiens GN=C4A PE=1 SV=2	CO4A_HUMAN	193	7.08	Homo sapiens	0.00659464	0.00535143	0.00969799	0.00321547	0.00455189	0.00371117	0.00294034	0.0030994	0.00195497	0.000928095	0.0117878	0.00931327	0.0096981	0.00901819	0.00833712			105	0.18904	0.269244	0.463623	0.291091	0.169435	0.353957	0.352698	0.258017	0.13319	0.344259	0.52893	0.452949	0.463458	0.482116	0.466142
10	Prothrombin OS=Homo sapiens GN=F2 PE=1 SV=2	THRB_HUMAN	70	5.7	Homo sapiens	0	0	0.0312069	0	0	0	0	0	0	0	0.0140015	0.0286169	0.0312082	0.0168622	0.019539			120	0.347044	0.355917	0.571894	0.361292	0.377195	0.436946	0.447094	0.398802	0.258881	0.455561	0.593051	0.550284	0.571889	0.569757	0.548597
11	Keratin, type I cytoskeletal 9 OS=Homo sapiens GN=KRT9 PE=1 SV=3	K1C9_HUMAN	62	4.89	Homo sapiens	0.0275579	0.0309865	0.00558888	0.0361175	0.0245412	0.0382105	0.0372096	0.0224232	0.0115192	0.0463698	0.0167793	0.00987511	0.00558949	0.012884	0.00724406			141	0.50009	0.51902	0.71549	0.573033	0.559969	0.556038	0.578617	0.561083	0.540088	0.639412	0.671245	0.683317	0.715519	0.70289	0.634076
12	Apolipoprotein D OS=Homo sapiens GN=APOD PE=1 SV=1	APOD_HUMAN	21	4.79	Homo sapiens	0.0777828	0.0693257	0.0412202	0.0932567	0.00552039	0.0587484	0.0601542	0.0435084	0.0273953	0.0122022	0.117542	0.0498179	0.0412184	0.0431412	0.0840072			161	0.610768	0.631662	0.82601	0.696948	0.606911	0.652477	0.65572	0.650004	0.612445	0.685319	0.843555	0.812849	0.826033	0.825697	0.744417
13	Fibrinogen beta chain OS=Homo sapiens GN=FGB PE=1 SV=2	FIBB_HUMAN	56	8.38	Homo sapiens	0	0.0102424	0.023466	0.0258227	0	0.00268971	0	0.00137061	0.00602262	0.00185233	0.0247887	0.0230995	0.0234677	0.0261906	0.0239804			195	1	1	1	1	1	1	1	1	1	1	1	1	1	1	1
14	Ig kappa chain C region OS=Homo sapiens GN=IGKC PE=1 SV=1	IGKC_HUMAN	12	5.68	Homo sapiens	0.188988	0.157199	0.0288759	0.092183	0.150978	0.176032	0.166131	0.159395	0.165321	0.114006	0.0233349	0.0460674	0.028879	0.0479734	0.0809382
15	Hyaluronan-binding protein 2 OS=Homo sapiens GN=HABP2 PE=1 SV=1	HABP2_HUMAN	63	6.52	Homo sapiens	0	0	0.0169206	0	0	0	0	0	0	0	0.0236867	0.0176949	0.0169222	0.0201556	0.0221051
16	Complement factor H OS=Homo sapiens GN=CFH PE=1 SV=4	CFAH_HUMAN	139	6.59	Homo sapiens	0.00299187	0	0.00791677	0.00122068	0	0	0	0.000588466	0.00428066	0.00419667	0.00291482	0.00736874	0.0079166	0.0049195	0.00480925
17	Keratin, type I cytoskeletal 10 OS=Homo sapiens GN=KRT10 PE=1 SV=6	K1C10_HUMAN	59	4.88	Homo sapiens	0.00965546	0.0205724	0.00553342	0.0226836	0.0199516	0.0408401	0.0192368	0.0222197	0.00874062	0.0300058	0.0131629	0.00647123	0.00553415	0.00723997	0.00498428
18	Inter-alpha-trypsin inhibitor heavy chain H2 OS=Homo sapiens GN=ITIH2 PE=1 SV=2	ITIH2_HUMAN	106	6.85	Homo sapiens	0	0	0.0106634	0	0	0	0	0	0	0	0.00902378	0.00956359	0.0106639	0.00729088	0.00633391
19	Inter-alpha-trypsin inhibitor heavy chain H1 OS=Homo sapiens GN=ITIH1 PE=1 SV=3	ITIH1_HUMAN	101	6.78	Homo sapiens	0	0	0.0115201	0	0	0	0	0	0	0	0.00354827	0.00903207	0.0115207	0.00747225	0.00554716					CHOL					DOPG					DOTAP
20	Haptoglobin OS=Homo sapiens GN=HP PE=1 SV=1	HPT_HUMAN	45	6.56	Homo sapiens	0.0125438	0.00222091	0.0198615	0.00852434	0.00667368	0	0.00581182	0	0.0070568	0	0.00677896	0.0145103	0.0198638	0.0106559	0.0030873				N° prot	CHOL_A	CHOL_B	CHOL_C	CHOL_D	CHOL_E	DOPG_A	DOPG_B	DOPG_C	DOPG_D	DOPG_E	DOTAP_A	DOTAP_B	DOTAP_C	DOTAP_D	DOTAP_E
21	Ig lambda-2 chain C regions OS=Homo sapiens GN=IGLC2 PE=1 SV=1	LAC2_HUMAN	11	7.34	Homo sapiens	0.186735	0.187837	0.0238714	0.169629	0.169797	0.148905	0.142881	0.144649	0.111816	0.100299	0.0623563	0.046515	0.0238852	0.049274	0.102395			>300	4	0.00857002	0.00802095	0.0102607	0.0168299	0.00250268	0.00233851	0.00414551	0.00130698	0.00452304	0.00270511	0.00356542	0.008924	0.0102743	0.00954394	0.00145702
22	Fibrinogen gamma chain OS=Homo sapiens GN=FGG PE=1 SV=3	FIBG_HUMAN	52	5.32	Homo sapiens	0	0.00618061	0.0118038	0.00986244	0.00222939	0.00476901	0	0	0.00801404	0.00424963	0.0152484	0.0152301	0.0118048	0.0130128	0.0135014			150-300	11	0.026453	0.0245688	0.0496393	0.0235521	0.0215746	0.0159586	0.0204695	0.0146241	0.0118497	0.0127095	0.0300863	0.0401063	0.0496401	0.0446446	0.0343052
23	Ig gamma-2 chain C region OS=Homo sapiens GN=IGHG2 PE=1 SV=2	IGHG2_HUMAN	36	7.66	Homo sapiens	0	0.0505739	0.0137651	0.0801395	0.0569072	0.0109313	0.033856	0.0487126	0.0798726	0.0561437	0.00211576	0.00947621	0.013958	0.0211819	0			100-150	13	0.00299187	0	0.046042	0.00122068	0	0	0	0.000588466	0.00428066	0.00613761	0.0333144	0.0463277	0.046044	0.0439387	0.0216931
24	Alpha-2-macroglobulin OS=Homo sapiens GN=A2M PE=1 SV=3	A2MG_HUMAN	163	6.43	Homo sapiens	0.00309508	0.000408756	0.00497569	0	0	0	0	0	0.00024185	0	0.00109486	0.00370005	0.00497578	0.0032755	0.00328451			80-100	13	0	0	0.0228844	0.0120652	0	0	0	0	0.00245912	0.00180098	0.010383	0.023907	0.0228856	0.0239216	0.00980927
25	Vitamin K-dependent protein S OS=Homo sapiens GN=PROS1 PE=1 SV=1	PROS_HUMAN	75	5.37	Homo sapiens	0	0	0.00988097	0	0	0	0	0	0	0	0.00749636	0.0093768	0.00988021	0.00581077	0.0082118			70-80	10	0	0.00501293	0.0630218	0.00313191	0	0	0.0107344	0.004137	0.00205784	0.00211695	0.031861	0.0541818	0.0630214	0.0402397	0.0402508
26	Apolipoprotein E OS=Homo sapiens GN=APOE PE=1 SV=1	APOE_HUMAN	36	5.42	Homo sapiens	0	0	0.0165305	0.00192777	0	0	0	0	0	0	0.0150231	0.0212368	0.0165305	0.0157621	0.00824793			60-70	18	0.119327	0.163293	0.0972761	0.155076	0.123177	0.229468	0.219396	0.176488	0.0660702	0.199521	0.206184	0.124332	0.097085	0.134285	0.152943
27	Apolipoprotein A-I OS=Homo sapiens GN=APOA1 PE=1 SV=1	APOA1_HUMAN	31	5.5	Homo sapiens	0.00668699	0	0.021287	0.00434296	0	0	0.00286385	0	0	0	0.016756	0.021624	0.0212883	0.0157779	0.0147688			50-60	36	0.0316984	0.068349	0.174498	0.0792157	0.022181	0.106192	0.0979518	0.0608721	0.0419492	0.119267	0.213536	0.15517	0.174508	0.185543	0.205683
28	Thrombospondin-1 OS=Homo sapiens GN=THBS1 PE=1 SV=2	TSP1_HUMAN	129	4.51	Homo sapiens	0	0	0.00116093	0	0	0	0	0	0	0	0.00761171	0.0070428	0.00116125	0.0130034	0			40-50	15	0.158003	0.0866723	0.108272	0.0702007	0.20776	0.0829885	0.0943962	0.140785	0.125691	0.111302	0.0641209	0.0973347	0.108431	0.0876409	0.0824556
29	CD5 antigen-like OS=Homo sapiens GN=CD5L PE=1 SV=1	CD5L_HUMAN	38	5.15	Homo sapiens	0.0186393	0.0198026	0.00740065	0.00634624	0.0232109	0.0162331	0.0114277	0.0314834	0.00887468	0.0152826	0.00616654	0.00972304	0.00740135	0.00748074	0.0211734			30-40	21	0.153046	0.163103	0.143596	0.211741	0.182773	0.119092	0.131523	0.162281	0.281206	0.183851	0.0781936	0.133033	0.14363	0.133133	0.0854788
30	Apolipoprotein C-III OS=Homo sapiens GN=APOC3 PE=1 SV=1	APOC3_HUMAN	11	5.04	Homo sapiens	0	0	0.0464345	0	0	0	0	0	0	0	0.0217634	0.0218652	0.0464379	0.0217953	0.00757332			20-30	20	0.110677	0.112642	0.110519	0.123915	0.0469424	0.0964388	0.0771033	0.0889207	0.0723576	0.0459067	0.17231	0.129531	0.110515	0.122808	0.110341
31	Cartilage oligomeric matrix protein OS=Homo sapiens GN=COMP PE=1 SV=2	COMP_HUMAN	83	4.16	Homo sapiens	0	0	0.00707533	0	0	0	0	0	0	0	0.00462367	0.00835715	0.00707631	0.00866403	0.00384289			<20	34	0.389232	0.368338	0.17399	0.303052	0.393089	0.347523	0.34428	0.349996	0.387555	0.314681	0.156445	0.187151	0.173967	0.174303	0.255583
32	Ceruloplasmin OS=Homo sapiens GN=CP PE=1 SV=1	CERU_HUMAN	122	5.5	Homo sapiens	0	0	0.00460098	0	0	0	0	0	0	0	0.00467388	0.00494726	0.00460135	0.00458587	0.00220643			tot	195	1	1	1	1	1	1	1	1	1	1	1	1	1	1	1
33	Serum paraoxonase/arylesterase 1 OS=Homo sapiens GN=PON1 PE=1 SV=3	PON1_HUMAN	40	4.89	Homo sapiens	0	0	0.0153764	0	0	0	0	0	0	0	0.00139664	0.0135802	0.0153768	0.018414	0.00804532
34	Hornerin OS=Homo sapiens GN=HRNR PE=1 SV=2	HORN_HUMAN	282	10.24	Homo sapiens	0	0.00608551	0	0.00376765	0.000411093	0.00400606	0.0051008	0.000984578	0.000420635	0.00474393	0.00034985	0.000389152	0	0.000630959	0
35	Fibrinogen alpha chain OS=Homo sapiens GN=FGA PE=1 SV=2	FIBA_HUMAN	95	5.87	Homo sapiens	0	0	0.00619614	0.00400314	0	0	0	0	0	0	0.00409317	0.00549668	0.00619628	0.00355197	0.00505093
36	Clusterin OS=Homo sapiens GN=CLU PE=1 SV=1	CLUS_HUMAN	52	6.21	Homo sapiens	0	0	0.0102198	0	0	0	0	0	0	0	0.00499457	0.0102004	0.0102192	0.0123047	0.00309436
37	Kininogen-1 OS=Homo sapiens GN=KNG1 PE=1 SV=2	KNG1_HUMAN	72	6.8	Homo sapiens	0	0	0.00883936	0	0	0	0	0	0	0	0.00427218	0.00794482	0.00883876	0.00480493	0.00554701
38	Plasminogen OS=Homo sapiens GN=PLG PE=1 SV=2	PLMN_HUMAN	91	7.25	Homo sapiens	0	0	0.0050479	0.00373867	0	0	0	0	0.000872242	0.00034471	0.0016662	0.00582878	0.00504734	0.00575084	0.000915456
39	Keratin, type I cytoskeletal 14 OS=Homo sapiens GN=KRT14 PE=1 SV=4	K1C14_HUMAN	52	4.81	Homo sapiens	0.00553172	0.0150621	0.0021436	0.0170892	0	0.026691	0.0360605	0.0221824	0.00686212	0.0269248	0.00947984	0.00385146	0.00214319	0.00479285	0
40	Keratin, type II cytoskeletal 2 epidermal OS=Homo sapiens GN=KRT2 PE=1 SV=2	K22E_HUMAN	65	8.17	Homo sapiens	0	0.0230657	0.00291437	0.0200798	0	0.0365178	0.0247494	0.0215269	0.0021227	0.023813	0.0130304	0.00400982	0.00291491	0.00492926	0.0036676
41	Serotransferrin OS=Homo sapiens GN=TF PE=1 SV=3	TRFE_HUMAN	77	7.13	Homo sapiens	0	0.00501293	0.00475731	0.00313191	0	0	0.0107344	0.004137	0.00205784	0.00211695	0.00269929	0.00404995	0.00475715	0.00599351	0.00454002
42	Keratin, type II cytoskeletal 6A OS=Homo sapiens GN=KRT6A PE=1 SV=3	K2C6A_HUMAN	60	8.16	Homo sapiens	0	0.0112346	0.00045524	0.00916051	0.0107756	0.0222784	0.0335542	0.0153209	0.0042987	0.0255468	0.0121213	0.00252248	0.000454704	0.00222119	0
43	Apolipoprotein(a) OS=Homo sapiens GN=LPA PE=1 SV=1	APOA_HUMAN	501	5.77	Homo sapiens	0.00126546	0.00027629	0.000743902	0.00233644	0	0.000419256	0	0	0.000870667	0.000178332	0	0.000720117	0.000757453	0.00122393	0
44	Inter-alpha-trypsin inhibitor heavy chain H3 OS=Homo sapiens GN=ITIH3 PE=1 SV=2	ITIH3_HUMAN	100	5.49	Homo sapiens	0	0	0.00556109	0	0	0	0	0	0	0	0.0033553	0.00499789	0.00556139	0.00399543	0.00133166
45	Complement C5 OS=Homo sapiens GN=C5 PE=1 SV=4	CO5_HUMAN	188	6.49	Homo sapiens	0	0	0.00250632	0	0	0	0	0	0	0	0.000524775	0.00229841	0.00250642	0.00198563	0.000295713
46	Immunoglobulin lambda-like polypeptide 5 OS=Homo sapiens GN=IGLL5 PE=2 SV=2	IGLL5_HUMAN	23	9.05	Homo sapiens	0.0275465	0.0295958	0.00944325	0.0241458	0.0304049	0.0376904	0.0169491	0.0240339	0.0258701	0.0188443	0.00312258	0.0074547	0.00944259	0.00617081	0.00795394
47	Protein AMBP OS=Homo sapiens GN=AMBP PE=1 SV=1	AMBP_HUMAN	39	6.15	Homo sapiens	0	0	0.0134295	0	0	0	0	0	0	0	0.00727326	0.0126035	0.0134294	0.00683801	0.00547597
48	Fibronectin OS=Homo sapiens GN=FN1 PE=1 SV=4	FINC_HUMAN	263	5.45	Homo sapiens	0	0	0.00196904	0	0	0	0	0	0	0	0.000182052	0.00152477	0.00196887	0.00105004	0.00021117
49	Coagulation factor IX OS=Homo sapiens GN=F9 PE=1 SV=2	FA9_HUMAN	52	5.16	Homo sapiens	0	0	0.00742743	0	0	0	0	0	0	0	0.0028459	0.00872265	0.00742781	0.00667684	0.00821449
50	Apolipoprotein A-IV OS=Homo sapiens GN=APOA4 PE=1 SV=3	APOA4_HUMAN	45	5.05	Homo sapiens	0	0	0.00758911	0	0	0	0	0	0	0	0.00973734	0.00896187	0.0075882	0.00810005	0.00295736
51	Complement component C9 OS=Homo sapiens GN=C9 PE=1 SV=2	CO9_HUMAN	63	5.27	Homo sapiens	0	0	0.00333272	0	0	0	0	0	0	0	0.010974	0.00621275	0.0033327	0.00901995	0.0102158
52	Complement C1s subcomponent OS=Homo sapiens GN=C1S PE=1 SV=1	C1S_HUMAN	77	4.59	Homo sapiens	0	0	0.00467859	0	0	0	0	0	0	0	0.00266625	0.00366381	0.00467854	0.00460545	0.00241291
53	Alpha-1-antitrypsin OS=Homo sapiens GN=SERPINA1 PE=1 SV=3	A1AT_HUMAN	47	5.31	Homo sapiens	0	0	0.00834832	0	0	0	0	0	0	0	0	0.00701459	0.00834802	0.007197	0
54	Keratin, type II cytoskeletal 5 OS=Homo sapiens GN=KRT5 PE=1 SV=3	K2C5_HUMAN	62	7.91	Homo sapiens	0	0.0149722	0.00128566	0.0105495	0	0.0264601	0.027459	0.014818	0.00543979	0.0197245	0.0104198	0.0021531	0.00128559	0.00228692	0.00200705
55	Alpha-1-antichymotrypsin OS=Homo sapiens GN=SERPINA3 PE=1 SV=2	AACT_HUMAN	48	5.19	Homo sapiens	0	0	0.00736967	0	0	0	0	0	0	0	0	0.00629655	0.00737016	0.00388708	0.00155546
56	Ig alpha-1 chain C region OS=Homo sapiens GN=IGHA1 PE=1 SV=2	IGHA1_HUMAN	38	6.49	Homo sapiens	0.00365917	0.0121003	0.00535735	0.00257496	0.00619678	0.00811655	0.00688242	0	0.00626484	0.00352676	0.00480147	0.00553509	0.00535705	0.00467849	0.00773726
57	Coagulation factor X OS=Homo sapiens GN=F10 PE=1 SV=2	FA10_HUMAN	55	5.74	Homo sapiens	0	0	0.00535413	0	0	0	0	0	0	0	0.00421427	0.00529578	0.00535443	0.00386951	0.00585114
58	Ig gamma-3 chain C region OS=Homo sapiens GN=IGHG3 PE=1 SV=2	IGHG3_HUMAN	41	7.95	Homo sapiens	0.0271314	0	0.0156587	0.0238654	0	0.0134704	0	0.0157508	0.0749741	0.033916	0.0126691	0.0171859	0.0158141	0.0186254	0
59	C-reactive protein OS=Homo sapiens GN=CRP PE=1 SV=1	CRP_HUMAN	25	5.32	Homo sapiens	0	0	0.00341468	0	0	0	0	0	0	0	0.027742	0.0141381	0.0034144	0.0177677	0.00754701
60	Histidine-rich glycoprotein OS=Homo sapiens GN=HRG PE=1 SV=1	HRG_HUMAN	60	7.52	Homo sapiens	0	0	0.00501432	0	0	0	0	0	0	0.00273839	0	0.0026901	0.00501477	0.00222338	0.00231548
61	Complement C1q subcomponent subunit C OS=Homo sapiens GN=C1QC PE=1 SV=3	C1QC_HUMAN	26	8.58	Homo sapiens	0	0.00547951	0.00477814	0.00651275	0.0110171	0	0	0.0152803	0.0129775	0.0114239	0	0.00775568	0.00477811	0.00749331	0
62	Heparin cofactor 2 OS=Homo sapiens GN=SERPIND1 PE=1 SV=3	HEP2_HUMAN	57	6.89	Homo sapiens	0	0	0.00423993	0	0	0	0	0	0	0	0.00409183	0.00280782	0.00423984	0.00202236	0.00326053
63	Immunoglobulin J chain OS=Homo sapiens GN=IGJ PE=1 SV=4	IGJ_HUMAN	18	4.87	Homo sapiens	0	0.00769006	0.00690175	0	0.0422653	0	0.00959737	0.0199395	0	0.00992717	0.00999513	0.00401289	0.00690172	0.00296158	0.0134089
64	C4b-binding protein beta chain OS=Homo sapiens GN=C4BPB PE=1 SV=1	C4BPB_HUMAN	28	4.8	Homo sapiens	0	0	0.00795748	0	0	0	0	0	0	0	0.0119441	0.00646677	0.00795728	0.00537807	0.00851608
65	Vitamin K-dependent protein C OS=Homo sapiens GN=PROC PE=1 SV=1	PROC_HUMAN	52	6.23	Homo sapiens	0	0	0.00377589	0	0	0	0	0	0	0	0.000920761	0.00389521	0.00377593	0.00274252	0.000957208
66	Apolipoprotein C-II OS=Homo sapiens GN=APOC2 PE=1 SV=1	APOC2_HUMAN	11	4.36	Homo sapiens	0	0	0.0171921	0	0	0	0	0	0	0	0.012003	0.0202013	0.0171936	0.00569602	0
67	Beta-2-glycoprotein 1 OS=Homo sapiens GN=APOH PE=1 SV=3	APOH_HUMAN	38	8.03	Homo sapiens	0	0	0	0	0	0	0	0	0.0355189	0.00470234	0	0.00158833	0	0.00374578	0
68	Vitamin K-dependent protein Z OS=Homo sapiens GN=PROZ PE=1 SV=2	PROZ_HUMAN	45	5.87	Homo sapiens	0	0	0.00624944	0	0	0	0	0	0	0	0	0.00244885	0.00625002	0.00118171	0
69	Apolipoprotein M OS=Homo sapiens GN=APOM PE=1 SV=2	APOM_HUMAN	21	5.92	Homo sapiens	0	0	0.00939234	0	0	0	0	0	0	0	0	0.0072501	0.0093907	0.00548925	0
70	Keratin, type I cytoskeletal 16 OS=Homo sapiens GN=KRT16 PE=1 SV=4	K1C16_HUMAN	51	4.69	Homo sapiens	0	0.00522567	0	0	0	0.0312027	0.0350268	0	0	0.0274613	0.0111024	0	0	0.00488682	0
71	Alpha-2-HS-glycoprotein OS=Homo sapiens GN=AHSG PE=1 SV=1	FETUA_HUMAN	39	5.52	Homo sapiens	0	0	0.00671996	0	0	0	0	0	0	0	0.00399019	0.00362271	0.00671984	0.00182139	0
72	Alpha-1-acid glycoprotein 1 OS=Homo sapiens GN=ORM1 PE=1 SV=1	A1AG1_HUMAN	24	4.66	Homo sapiens	0	0	0.00738158	0	0	0	0	0	0	0	0	0.00794482	0.00738091	0.00331466	0.00231642
73	Serum amyloid A-2 protein OS=Homo sapiens GN=SAA2 PE=1 SV=1	SAA2_HUMAN	14	9.48	Homo sapiens	0	0	0.0135659	0	0	0	0	0	0	0	0.00943091	0.0106481	0.0135662	0.00952878	0
74	Transthyretin OS=Homo sapiens GN=TTR PE=1 SV=1	TTHY_HUMAN	16	5.58	Homo sapiens	0	0	0.0097894	0	0	0	0	0	0	0	0.00317364	0.0124894	0.00979067	0.00834641	0.0116121
75	Complement C1r subcomponent OS=Homo sapiens GN=C1R PE=1 SV=2	C1R_HUMAN	80	6.14	Homo sapiens	0	0	0.0017978	0	0	0	0	0	0	0	0	0.00127448	0.00179796	0.00199558	0
76	Properdin OS=Homo sapiens GN=CFP PE=1 SV=2	PROP_HUMAN	51	7.92	Homo sapiens	0	0.0110659	0.000401682	0.00204116	0	0	0.00338603	0.00308779	0.00272565	0.00525556	0	0	0.000401209	0	0.00217905
77	Protein Z-dependent protease inhibitor OS=Homo sapiens GN=SERPINA10 PE=1 SV=1	ZPI_HUMAN	51	8.58	Homo sapiens	0	0	0.00271164	0	0	0	0	0	0	0	0	0.00277019	0.00271119	0.00174023	0
78	Coagulation factor V OS=Homo sapiens GN=F5 PE=1 SV=4	FA5_HUMAN	252	5.95	Homo sapiens	0	0	0.000465387	0	0	0	0	0	0	0	0.00061753	0	0.000465565	0.000459623	0
79	Phosphatidylcholine-sterol acyltransferase OS=Homo sapiens GN=LCAT PE=1 SV=1	LCAT_HUMAN	50	6.04	Homo sapiens	0	0	0.00157886	0	0	0	0	0	0	0	0.00309046	0.00402381	0.00157876	0.00372617	0.00321813
80	Thrombospondin-4 OS=Homo sapiens GN=THBS4 PE=1 SV=2	TSP4_HUMAN	106	4.23	Homo sapiens	0	0	0.00178408	0	0	0	0	0	0	0	0.00218665	0.000465891	0.00178424	0.00142574	0.00052394
81	Complement component C6 OS=Homo sapiens GN=C6 PE=1 SV=3	CO6_HUMAN	105	6.74	Homo sapiens	0	0	0.00149597	0	0	0	0	0	0	0	0	0.00173749	0.00149599	0	0
82	Ficolin-3 OS=Homo sapiens GN=FCN3 PE=1 SV=2	FCN3_HUMAN	33	6.66	Homo sapiens	0	0	0.00455424	0	0.00723798	0	0	0	0	0.000871859	0	0.00333934	0.00455417	0.000524685	0.00487595
83	Complement component C8 alpha chain OS=Homo sapiens GN=C8A PE=1 SV=2	CO8A_HUMAN	65	6.41	Homo sapiens	0	0	0.00120206	0	0	0	0	0	0	0	0	0.00201889	0.00120216	0.00451275	0.0029027
84	Hemoglobin subunit beta OS=Homo sapiens GN=HBB PE=1 SV=2	HBB_HUMAN	16	7.32	Homo sapiens	0	0	0.00365881	0.00841449	0	0.00614886	0.00555278	0.0101575	0	0.00927516	0.00616611	0.00377229	0.00365845	0.00443963	0
85	Keratin, type I cytoskeletal 17 OS=Homo sapiens GN=KRT17 PE=1 SV=2	K1C17_HUMAN	48	4.67	Homo sapiens	0	0.00474001	0	0	0	0.0213264	0.0253927	0.0190986	0	0.0198348	0.0043831	0	0	0	0
86	Ig kappa chain V-III region HIC OS=Homo sapiens PE=1 SV=2	KV313_HUMAN	14	4.85	Homo sapiens	0	0	0.00519188	0	0.0170609	0	0	0	0	0.00224061	0	0	0.00518812	0.00191328	0
87	Retinol-binding protein 4 OS=Homo sapiens GN=RBP4 PE=1 SV=3	RET4_HUMAN	23	5.85	Homo sapiens	0	0	0.00738621	0	0	0	0	0	0	0	0	0.00302172	0.00738666	0.00234743	0
88	Serum amyloid P-component OS=Homo sapiens GN=APCS PE=1 SV=2	SAMP_HUMAN	25	6.52	Homo sapiens	0	0	0.00235782	0	0	0	0	0	0.00317496	0	0.00825583	0.0027985	0.00235736	0.00355566	0
89	Ig alpha-2 chain C region OS=Homo sapiens GN=IGHA2 PE=1 SV=3	IGHA2_HUMAN	37	6.02	Homo sapiens	0	0	0.00584825	0	0	0	0	0	0	0	0	0.00233657	0.00584817	0.00389123	0
90	Inter-alpha-trypsin inhibitor heavy chain H4 OS=Homo sapiens GN=ITIH4 PE=1 SV=4	ITIH4_HUMAN	103	6.97	Homo sapiens	0	0	0.00133873	0	0	0	0	0	0	0	0	0.00117197	0.00133856	0.000776338	0
91	Actin, cytoplasmic 1 OS=Homo sapiens GN=ACTB PE=1 SV=1	ACTB_HUMAN	42	5.15	Homo sapiens	0	0	0.00030391	0	0	0	0	0	0.00803999	0.000746871	0.00133013	0.00122999	0.000304404	0.00382732	0
92	Apolipoprotein A-II OS=Homo sapiens GN=APOA2 PE=1 SV=1	APOA2_HUMAN	11	6.6	Homo sapiens	0	0	0.0106324	0	0	0	0	0	0	0	0	0.0100596	0.0106348	0.00644495	0
93	Hemoglobin subunit alpha OS=Homo sapiens GN=HBA1 PE=1 SV=2	HBA_HUMAN	15	9.09	Homo sapiens	0	0	0	0.00652322	0	0.00730877	0	0.0158551	0	0.00287713	0	0	0	0	0
94	Alpha-1B-glycoprotein OS=Homo sapiens GN=A1BG PE=1 SV=4	A1BG_HUMAN	54	5.71	Homo sapiens	0	0	0.0025535	0	0	0	0	0	0	0	0	0.00185446	0.00255319	0.00115513	0
95	Filamin-A OS=Homo sapiens GN=FLNA PE=1 SV=4	FLNA_HUMAN	281	5.95	Homo sapiens	0	0.0012623	0	0.00147686	0	0	0	0	0.000635402	0.000566995	0	7.48388e-05	0	0.000282137	0
96	Lumican OS=Homo sapiens GN=LUM PE=1 SV=2	LUM_HUMAN	38	6.6	Homo sapiens	0	0	0.00308955	0	0	0	0	0	0	0	0.00125999	0.00235858	0.00308975	0.00140286	0
97	Mannan-binding lectin serine protease 1 OS=Homo sapiens GN=MASP1 PE=1 SV=3	MASP1_HUMAN	79	5.18	Homo sapiens	0	0	0.00215607	0	0	0	0	0	0	0	0	0	0.00215596	0.00146437	0
98	Dermcidin OS=Homo sapiens GN=DCD PE=1 SV=2	DCD_HUMAN	11	6.52	Homo sapiens	0.0135092	0.00908554	0	0.0128387	0	0.0091287	0	0	0.00363205	0.0108756	0	0	0	0.00322284	0
99	Gelsolin OS=Homo sapiens GN=GSN PE=1 SV=1	GELS_HUMAN	86	6.19	Homo sapiens	0	0	0.00114203	0	0	0	0	0	0	0	0	0.00151534	0.0011419	0.00124451	0
100	Secreted phosphoprotein 24 OS=Homo sapiens GN=SPP2 PE=1 SV=1	SPP24_HUMAN	24	8.46	Homo sapiens	0	0	0.00409054	0	0	0	0	0	0	0	0	0.00586808	0.00409059	0.00519225	0
101	Beta-Ala-His dipeptidase OS=Homo sapiens GN=CNDP1 PE=1 SV=4	CNDP1_HUMAN	57	4.95	Homo sapiens	0	0	0.0011461	0	0	0	0	0	0	0	0	0.000368942	0.00114608	0.00373605	0
102	Complement component C8 beta chain OS=Homo sapiens GN=C8B PE=1 SV=3	CO8B_HUMAN	67	8.17	Homo sapiens	0	0	0.000789946	0	0	0	0	0	0	0	0	0.00149464	0.000789714	0.00225982	0
103	Pigment epithelium-derived factor OS=Homo sapiens GN=SERPINF1 PE=1 SV=4	PEDF_HUMAN	46	6.33	Homo sapiens	0	0	0.00228355	0	0	0	0	0	0	0	0	0.00134168	0.00228313	0.000376405	0
104	Calreticulin OS=Homo sapiens GN=CALR PE=1 SV=1	CALR_HUMAN	48	4.04	Homo sapiens	0	0	0.0013703	0	0	0	0	0	0	0	0.00321923	0.00167661	0.00136988	0.00184916	0
105	Hemopexin OS=Homo sapiens GN=HPX PE=1 SV=2	HEMO_HUMAN	52	7.02	Homo sapiens	0	0	0.00201068	0	0	0	0	0	0	0	0	0.000976083	0.0020109	0.00136351	0
106	Complement component C8 gamma chain OS=Homo sapiens GN=C8G PE=1 SV=3	CO8G_HUMAN	22	8.48	Homo sapiens	0	0	0.00325954	0	0	0	0	0	0	0	0	0.00322143	0.00325995	0.0048339	0
107	Tropomyosin alpha-4 chain OS=Homo sapiens GN=TPM4 PE=1 SV=3	TPM4_HUMAN	29	4.36	Homo sapiens	0	0	0	0	0	0	0	0	0	0	0.00175097	0.00416252	0	0.00855155	0
108	Alpha-2-antiplasmin OS=Homo sapiens GN=SERPINF2 PE=1 SV=3	A2AP_HUMAN	55	6.24	Homo sapiens	0	0	0.0021412	0	0	0	0	0	0	0	0	0.000548594	0.00214145	0.000314811	0
109	Phosphatidylinositol-glycan-specific phospholipase D OS=Homo sapiens GN=GPLD1 PE=1 SV=3	PHLD_HUMAN	92	6.33	Homo sapiens	0	0	0.00113602	0	0	0	0	0	0	0	0	0.00119284	0.00113628	0.000479353	0
110	Antithrombin-III OS=Homo sapiens GN=SERPINC1 PE=1 SV=1	ANT3_HUMAN	53	6.68	Homo sapiens	0	0	0.00248047	0	0	0	0	0	0	0	0	0.000742016	0.00248019	0	0
111	Desmoplakin OS=Homo sapiens GN=DSP PE=1 SV=3	DESP_HUMAN	332	6.78	Homo sapiens	0	0	0	0	0	0	0	0	0	0.00112303	0	0	0	0	0
112	Angiotensinogen OS=Homo sapiens GN=AGT PE=1 SV=1	ANGT_HUMAN	53	6.27	Homo sapiens	0	0	0.00235163	0	0	0	0	0	0	0	0	0.00169968	0.0023515	0	0
113	Calmodulin-like protein 5 OS=Homo sapiens GN=CALML5 PE=1 SV=2	CALL5_HUMAN	16	4.05	Homo sapiens	0	0	0	0	0	0	0	0	0.0074395	0.00935632	0	0	0	0	0
114	Vitamin D-binding protein OS=Homo sapiens GN=GC PE=1 SV=1	VTDB_HUMAN	53	5.21	Homo sapiens	0	0	0.00112745	0	0	0	0	0	0	0	0	0.00226046	0.00112701	0.00133251	0
115	Ig heavy chain V-III region 23 OS=Homo sapiens GN=IGHV3-23 PE=1 SV=2	HV303_HUMAN	13	8.46	Homo sapiens	0	0	0.00203884	0	0.0129868	0	0	0	0.0213768	0.0206013	0	0	0.00253127	0.00206045	0
116	Ficolin-2 OS=Homo sapiens GN=FCN2 PE=1 SV=2	FCN2_HUMAN	34	6.77	Homo sapiens	0	0.0063018	0	0	0	0	0.00507904	0	0.00409976	0.00262778	0.0016431	0	0	0	0
117	Complement factor H-related protein 1 OS=Homo sapiens GN=CFHR1 PE=1 SV=2	FHR1_HUMAN	38	7.42	Homo sapiens	0	0	0.00279295	0	0	0	0	0	0.00730148	0	0	0.00209405	0.00279296	0.00142081	0
118	Complement C1q subcomponent subunit A OS=Homo sapiens GN=C1QA PE=1 SV=2	C1QA_HUMAN	26	9.45	Homo sapiens	0.00534802	0.00824082	0	0	0	0	0	0.00609812	0	0.00343633	0	0.00158249	0	0.00239911	0
119	Platelet factor 4 OS=Homo sapiens GN=PF4 PE=1 SV=2	PLF4_HUMAN	11	8.78	Homo sapiens	0	0.00652671	0	0	0	0	0	0	0.0234582	0	0	0	0	0	0
120	Ig heavy chain V-I region V35 OS=Homo sapiens PE=1 SV=1	HV103_HUMAN	13	9.87	Homo sapiens	0	0	0	0	0	0	0.0201178	0	0	0	0	0.00154732	0	0	0
121	Ig gamma-4 chain C region OS=Homo sapiens GN=IGHG4 PE=1 SV=1	IGHG4_HUMAN	36	7.41	Homo sapiens	0	0	0.00904965	0	0	0	0	0	0	0.0109517	0	0.00453611	0.0094188	0	0
122	Integrin beta-3 OS=Homo sapiens GN=ITGB3 PE=1 SV=2	ITB3_HUMAN	87	4.85	Homo sapiens	0	0	0	0.00432335	0	0	0	0	0.00113891	0	0	0	0	0.00080543	0
123	Serum paraoxonase/lactonase 3 OS=Homo sapiens GN=PON3 PE=1 SV=3	PON3_HUMAN	40	5.1	Homo sapiens	0	0	0.00159971	0	0	0	0	0	0	0	0	0.000720441	0.00160105	0.00132942	0
124	Ig lambda chain V-I region HA OS=Homo sapiens PE=1 SV=1	LV102_HUMAN	12	5.69	Homo sapiens	0	0	0.00220875	0	0	0	0	0	0.00332938	0	0	0	0.00113676	0	0
125	Galectin-3-binding protein OS=Homo sapiens GN=LGALS3BP PE=1 SV=1	LG3BP_HUMAN	65	4.9	Homo sapiens	0	0	0	0	0.0089473	0	0	0	0	0.000442636	0	0.000309463	0	0	0.00170972
126	Complement C4-B OS=Homo sapiens GN=C4B PE=1 SV=2	CO4B_HUMAN	193	7.28	Homo sapiens	0	0	0.00990377	0	0	0	0	0	0	0	0	0.0063595	0.00990379	0.0092944	0
127	Complement C1q subcomponent subunit B OS=Homo sapiens GN=C1QB PE=1 SV=3	C1QB_HUMAN	27	8.87	Homo sapiens	0	0	0.000978571	0	0	0	0	0	0	0	0	0.00372585	0.000978744	0.00395395	0
128	Mannan-binding lectin serine protease 2 OS=Homo sapiens GN=MASP2 PE=1 SV=4	MASP2_HUMAN	76	5.37	Homo sapiens	0	0	0.000943001	0	0	0	0	0	0	0	0	0.000529493	0.000943283	0.000473604	0
129	Alpha-1-acid glycoprotein 2 OS=Homo sapiens GN=ORM2 PE=1 SV=2	A1AG2_HUMAN	24	4.76	Homo sapiens	0	0	0.00599442	0	0	0	0	0	0	0	0	0.00120073	0.00599441	0	0
130	Complement factor I OS=Homo sapiens GN=CFI PE=1 SV=2	CFAI_HUMAN	66	7.53	Homo sapiens	0	0	0.00139627	0	0	0	0	0	0	0	0	0.000595861	0.00139623	0	0
131	Endoplasmin OS=Homo sapiens GN=HSP90B1 PE=1 SV=1	ENPL_HUMAN	92	4.48	Homo sapiens	0	0	0.000208113	0	0	0	0	0	0	0	0	0	0.000208451	0	0
132	Ezrin OS=Homo sapiens GN=EZR PE=1 SV=4	EZRI_HUMAN	69	6.17	Homo sapiens	0	0	0	0	0	0.0014553	0	0	0	0	0	0	0	0	0
133	Ig heavy chain V-III region GA OS=Homo sapiens PE=1 SV=1	HV308_HUMAN	13	10.02	Homo sapiens	0	0	0	0	0	0	0	0	0	0	0	0	0	0.00139513	0
134	Apolipoprotein F OS=Homo sapiens GN=APOF PE=1 SV=2	APOF_HUMAN	35	5.36	Homo sapiens	0	0	0.00186531	0	0	0	0	0	0	0	0	0.00112362	0.00186563	0	0
135	Haptoglobin-related protein OS=Homo sapiens GN=HPR PE=2 SV=2	HPTR_HUMAN	39	7.11	Homo sapiens	0	0	0.00722283	0	0	0	0	0	0	0	0	0	0.00722783	0	0
136	Nephronectin OS=Homo sapiens GN=NPNT PE=2 SV=3	NPNT_HUMAN	62	8.38	Homo sapiens	0	0	0	0	0	0	0	0	0.000635831	0	0	0	0	0	0
137	Integrin alpha-IIb OS=Homo sapiens GN=ITGA2B PE=1 SV=3	ITA2B_HUMAN	113	5.03	Homo sapiens	0	0	0	0	0	0	0	0	0	0	0	0	0	0.000469284	0
138	Lipopolysaccharide-binding protein OS=Homo sapiens GN=LBP PE=1 SV=3	LBP_HUMAN	53	6.68	Homo sapiens	0	0	0	0	0	0	0	0	0.00449177	0.0022286	0	0	0	0	0
139	Sodium/potassium-transporting ATPase subunit alpha-2 OS=Homo sapiens GN=ATP1A2 PE=1 SV=1	AT1A2_HUMAN	112	5.33	Homo sapiens	0	0	0	0	0	0	0	0	0	0	0	0	0	0	0.000940793
140	Lysozyme C OS=Homo sapiens GN=LYZ PE=1 SV=1	LYSC_HUMAN	17	9.35	Homo sapiens	0	0	0	0	0	0	0	0	0.00465173	0.00169243	0	0	0	0	0
141	Serum amyloid A-4 protein OS=Homo sapiens GN=SAA4 PE=1 SV=2	SAA4_HUMAN	15	9.38	Homo sapiens	0	0	0.000850949	0	0	0	0	0	0	0	0	0.00603566	0.000852332	0.00531276	0
142	Ig lambda-7 chain C region OS=Homo sapiens GN=IGLC7 PE=4 SV=2	LAC7_HUMAN	11	8.48	Homo sapiens	0	0	0	0	0	0	0	0	0	0	0	0	0	0	0.0294124
143	Selenoprotein P OS=Homo sapiens GN=SEPP1 PE=1 SV=3	SEPP1_HUMAN	43	7.92	Homo sapiens	0	0	0.00106166	0	0	0	0	0	0	0	0	0	0.00106191	0.000415285	0
144	Collectin-11 OS=Homo sapiens GN=COLEC11 PE=1 SV=1	COL11_HUMAN	29	5.06	Homo sapiens	0	0	0.00135411	0	0	0	0	0	0	0	0	0.00312189	0.00135413	0	0
145	Lipocalin-1 OS=Homo sapiens GN=LCN1 PE=1 SV=1	LCN1_HUMAN	19	5.3	Homo sapiens	0	0	0	0	0	0	0	0	0	0.00153709	0	0	0	0	0
146	Prenylcysteine oxidase 1 OS=Homo sapiens GN=PCYOX1 PE=1 SV=3	PCYOX_HUMAN	57	6.1	Homo sapiens	0	0	0	0.00171664	0	0	0	0	0	0	0	0	0	0.00109202	0
147	Ig heavy chain V-III region GAL OS=Homo sapiens PE=1 SV=1	HV320_HUMAN	13	8.7	Homo sapiens	0	0	0	0	0	0	0	0	0.0121887	0.00241297	0	0	0	0	0
148	Ig lambda chain V-III region LOI OS=Homo sapiens PE=1 SV=1	LV302_HUMAN	12	4.72	Homo sapiens	0	0	0.0027778	0	0	0	0	0	0.0066342	0	0	0	0.00331059	0	0
149	Serglycin OS=Homo sapiens GN=SRGN PE=1 SV=3	SRGN_HUMAN	18	4.57	Homo sapiens	0	0	0	0	0	0	0	0	0	0	0.00822148	0.0039373	0	0.00195399	0
150	Filaggrin-2 OS=Homo sapiens GN=FLG2 PE=1 SV=1	FILA2_HUMAN	248	8.35	Homo sapiens	0	0	0	0	0	0	0	0.000964814	0	0.000662514	0	0	0	0	0
151	Keratin, type I cytoskeletal 13 OS=Homo sapiens GN=KRT13 PE=1 SV=4	K1C13_HUMAN	50	4.61	Homo sapiens	0	0	0	0	0	0	0	0	0	0.0101459	0	0	0	0	0
152	Apolipoprotein C-I OS=Homo sapiens GN=APOC1 PE=1 SV=1	APOC1_HUMAN	9	9.17	Homo sapiens	0	0	0	0	0	0	0	0	0	0	0	0	0	0.00198414	0
153	Pre-mRNA-splicing factor CWC25 homolog OS=Homo sapiens GN=CWC25 PE=1 SV=1	CWC25_HUMAN	50	10.9	Homo sapiens	0	0	0	0	0	0	0.00177559	0.00314954	0	0	0	0	0	0	0
154	Glutathione peroxidase 3 OS=Homo sapiens GN=GPX3 PE=1 SV=2	GPX3_HUMAN	26	8.29	Homo sapiens	0	0	0.00151035	0	0	0	0	0	0	0	0	0	0.00151037	0	0
155	Ig kappa chain V-I region HK102 (Fragment) OS=Homo sapiens GN=IGKV1-5 PE=4 SV=1	KV110_HUMAN	13	8.46	Homo sapiens	0	0	0	0	0	0	0	0	0	0.00668954	0	0	0	0	0.0102435
156	Ig heavy chain V-II region ARH-77 OS=Homo sapiens PE=4 SV=1	HV209_HUMAN	16	8.45	Homo sapiens	0	0	0	0	0	0	0	0	0.00499406	0	0	0	0	0	0
157	Erythrocyte band 7 integral membrane protein OS=Homo sapiens GN=STOM PE=1 SV=3	STOM_HUMAN	32	8.07	Homo sapiens	0	0	0	0	0	0	0	0	0.00371975	0	0	0	0	0	0
158	Coagulation factor VII OS=Homo sapiens GN=F7 PE=1 SV=1	FA7_HUMAN	52	7.23	Homo sapiens	0	0	0.000508104	0	0	0	0	0	0	0	0	0	0.000508194	0	0
159	Junction plakoglobin OS=Homo sapiens GN=JUP PE=1 SV=3	PLAK_HUMAN	82	6.05	Homo sapiens	0	0	0	0	0	0	0	0	0	0.00145627	0	0	0	0	0
160	Amyloid beta A4 protein OS=Homo sapiens GN=APP PE=1 SV=3	A4_HUMAN	87	4.45	Homo sapiens	0	0	0	0	0	0	0	0	0	0	0	0.000241721	0	0.0012286	0
161	Elongation factor 1-alpha 1 OS=Homo sapiens GN=EEF1A1 PE=1 SV=1	EF1A1_HUMAN	50	9.5	Homo sapiens	0	0	0.000255285	0	0	0	0	0	0	0	0.00213287	0	0.0002557	0	0
162	Aggrecan core protein OS=Homo sapiens GN=ACAN PE=1 SV=2	PGCA_HUMAN	250	3.82	Homo sapiens	0	0	0.00010602	0	0	0	0	0	0	0	0	0	0.000105939	7.1429e-05	0
163	Heat shock 70 kDa protein 1-like OS=Homo sapiens GN=HSPA1L PE=1 SV=2	HS71L_HUMAN	70	5.82	Homo sapiens	0	0	0.000378643	0	0	0	0	0	0	0	0.000725403	0	0.000378353	0	0
164	Ig kappa chain V-IV region (Fragment) OS=Homo sapiens GN=IGKV4-1 PE=4 SV=1	KV401_HUMAN	13	4.85	Homo sapiens	0	0	0	0	0	0	0	0	0.0091563	0	0	0	0	0	0
165	Angiopoietin-related protein 6 OS=Homo sapiens GN=ANGPTL6 PE=1 SV=1	ANGL6_HUMAN	52	8.64	Homo sapiens	0	0	0.000615272	0	0	0	0	0	0	0	0	0	0.00061579	0	0
166	Desmocollin-1 OS=Homo sapiens GN=DSC1 PE=1 SV=2	DSC1_HUMAN	100	5.08	Homo sapiens	0	0	0	0	0	0	0	0	0	0.000893445	0	0	0	0	0
167	14-3-3 protein zeta/delta OS=Homo sapiens GN=YWHAZ PE=1 SV=1	1433Z_HUMAN	28	4.43	Homo sapiens	0	0	0	0	0	0	0	0	0	0	0	0	0	0.00253194	0
168	Apolipoprotein L1 OS=Homo sapiens GN=APOL1 PE=1 SV=5	APOL1_HUMAN	44	5.55	Homo sapiens	0	0	0.000728089	0	0	0	0	0	0	0	0	0	0.000728418	0	0
169	Carboxypeptidase N catalytic chain OS=Homo sapiens GN=CPN1 PE=1 SV=1	CBPN_HUMAN	52	7.36	Homo sapiens	0	0	0.000245466	0	0	0	0	0	0	0	0	0	0.000245865	0	0
170	Complement component C7 OS=Homo sapiens GN=C7 PE=1 SV=2	CO7_HUMAN	94	6.44	Homo sapiens	0	0	0.000281079	0	0	0	0	0	0	0	0	0	0.000281129	0	0
171	Neutrophil defensin 1 OS=Homo sapiens GN=DEFA1 PE=1 SV=1	DEF1_HUMAN	10	7.04	Homo sapiens	0	0	0	0.0134632	0	0	0	0	0.00790794	0	0	0	0	0	0
172	Filaggrin OS=Homo sapiens GN=FLG PE=1 SV=3	FILA_HUMAN	435	9.6	Homo sapiens	0	0	0	0	0	0	0	0	0	0.000166349	0	0	0	0	0
173	Plasma kallikrein OS=Homo sapiens GN=KLKB1 PE=1 SV=1	KLKB1_HUMAN	71	8.26	Homo sapiens	0	0	0.000180955	0	0	0	0	0	0	0	0	0	0.000180896	0	0
174	Tubulin alpha-4A chain OS=Homo sapiens GN=TUBA4A PE=1 SV=1	TBA4A_HUMAN	50	4.69	Homo sapiens	0	0	0	0	0	0	0	0	0	0	0	0.000402302	0	0.000719878	0
175	Extracellular superoxide dismutase [Cu-Zn] OS=Homo sapiens GN=SOD3 PE=1 SV=2	SODE_HUMAN	26	6.59	Homo sapiens	0	0	0	0	0	0	0	0	0	0	0.00195301	0	0	0.000686817	0
176	Fibulin-1 OS=Homo sapiens GN=FBLN1 PE=1 SV=4	FBLN1_HUMAN	77	4.86	Homo sapiens	0	0	0	0	0	0	0	0	0	0	0	0	0	0.000224865	0
177	Complement factor B OS=Homo sapiens GN=CFB PE=1 SV=2	CFAB_HUMAN	86	7.07	Homo sapiens	0	0	0	0	0	0	0	0	0	0	0	0	0	0.000201333	0
178	Afamin OS=Homo sapiens GN=AFM PE=1 SV=1	AFAM_HUMAN	69	5.7	Homo sapiens	0	0	0.000464289	0	0	0	0	0	0	0	0	0	0.000464499	0	0
179	Phospholipid transfer protein OS=Homo sapiens GN=PLTP PE=1 SV=1	PLTP_HUMAN	55	7.01	Homo sapiens	0	0	0.000233596	0	0	0	0	0	0	0	0	0	0.00023352	0	0
180	Desmoglein-1 OS=Homo sapiens GN=DSG1 PE=1 SV=2	DSG1_HUMAN	114	4.66	Homo sapiens	0	0	0	0	0	0	0	0	0	0.0010475	0	0	0	0	0
181	Collectin-10 OS=Homo sapiens GN=COLEC10 PE=2 SV=2	COL10_HUMAN	31	7.39	Homo sapiens	0	0	0	0	0	0	0	0	0	0	0	0.000678378	0	0	0
182	Small proline-rich protein 2A OS=Homo sapiens GN=SPRR2A PE=1 SV=1	SPR2A_HUMAN	8	8.49	Homo sapiens	0	0	0	0	0	0	0	0	0	0.0147916	0	0	0	0	0
183	Glyceraldehyde-3-phosphate dehydrogenase OS=Homo sapiens GN=GAPDH PE=1 SV=3	G3P_HUMAN	36	8.73	Homo sapiens	0	0	0	0	0	0	0	0	0	0.00161044	0	0	0	0	0
184	Keratin, type II cytoskeletal 78 OS=Homo sapiens GN=KRT78 PE=2 SV=2	K2C78_HUMAN	57	5.83	Homo sapiens	0	0	0	0	0	0	0	0	0	0.00211017	0	0	0	0	0
185	Alpha-amylase 1 OS=Homo sapiens GN=AMY1A PE=1 SV=2	AMY1_HUMAN	58	6.92	Homo sapiens	0	0	0	0	0	0	0	0	0.000683757	0	0	0	0	0	0
186	Glucosidase 2 subunit beta OS=Homo sapiens GN=PRKCSH PE=1 SV=2	GLU2B_HUMAN	59	4.05	Homo sapiens	0	0	0	0	0	0	0	0	0	0	0	0.000356436	0	0	0
187	Dickkopf-related protein 3 OS=Homo sapiens GN=DKK3 PE=1 SV=2	DKK3_HUMAN	38	4.3	Homo sapiens	0	0	0.000335901	0	0	0	0	0	0	0	0	0	0.000336447	0	0
188	Keratin, type II cytoskeletal 4 OS=Homo sapiens GN=KRT4 PE=1 SV=4	K2C4_HUMAN	57	6.55	Homo sapiens	0	0	0	0	0	0	0	0	0	0.00599463	0	0	0	0	0
189	Trypsin-1 OS=Homo sapiens GN=PRSS1 PE=1 SV=1	TRY1_HUMAN	27	6.49	Homo sapiens	0	0	0	0	0	0	0	0	0.00293978	0	0	0	0	0	0
190	Integrin beta-1 OS=Homo sapiens GN=ITGB1 PE=1 SV=2	ITB1_HUMAN	88	5.04	Homo sapiens	0	0	0	0	0	0	0	0	0.000447972	0	0	0	0	0	0
191	Prolactin-inducible protein OS=Homo sapiens GN=PIP PE=1 SV=1	PIP_HUMAN	17	8.18	Homo sapiens	0	0	0	0	0	0	0	0	0	0.00171792	0	0	0	0	0
192	Extracellular glycoprotein lacritin OS=Homo sapiens GN=LACRT PE=1 SV=1	LACRT_HUMAN	14	5.2	Homo sapiens	0	0	0	0	0	0	0	0	0	0.00638175	0	0	0	0	0
193	Suprabasin OS=Homo sapiens GN=SBSN PE=1 SV=2	SBSN_HUMAN	61	7.01	Homo sapiens	0	0	0	0	0	0	0	0	0	0.00146466	0	0	0	0	0
194	Platelet basic protein OS=Homo sapiens GN=PPBP PE=1 SV=3	CXCL7_HUMAN	14	9.07	Homo sapiens	0	0	0	0	0	0	0	0	0.00564853	0	0	0	0	0	0
195	Tubulin beta-1 chain OS=Homo sapiens GN=TUBB1 PE=1 SV=1	TBB1_HUMAN	50	4.82	Homo sapiens	0	0	0	0	0	0	0	0	0	0	0	0	0	0.000362733	0

## Sheet: Pl-Pancreas
						CHOL					DOPG					DOTAP
						4.70159	9.36073	50.9777	9.70261	5.69907	6.49879	7.65273	8.36491	16.8027	22.4171	12.9954	33.1816	50.9743	37.5314	12.4631
#	Identified Proteins (195)	Accession Number	Molecular Weight	pI	Taxonomy	CHOL_A	CHOL_B	CHOL_C	CHOL_D	CHOL_E	DOPG_A	DOPG_B	DOPG_C	DOPG_D	DOPG_E	DOTAP_A	DOTAP_B	DOTAP_C	DOTAP_D	DOTAP_E
1	Apolipoprotein B-100 OS=Homo sapiens GN=APOB PE=1 SV=2	APOB_HUMAN	516	7.04	Homo sapiens	0.00730456	0.00774466	0.00951681	0.0144934	0.00250268	0.00191925	0.00414551	0.00130698	0.00365237	0.0012374	0.00356542	0.00820388	0.00951687	0.00832001	0.00145702
2	Vitronectin OS=Homo sapiens GN=VTN PE=1 SV=1	VTNC_HUMAN	54	5.54	Homo sapiens	0.0165112	0	0.0801733	0	0	0	0.00246609	0.00886199	0.00440859	0.00303864	0.117463	0.0595932	0.08018	0.0862606	0.136442				14	0.0328945	0.0439221	0.0241154	0.0344367	0.030816	0.0490053	0.0439433	0.0501213	0.036591	0.0317605	0.0150362	0.0276574	0.0241168	0.0274217	0.00795394
3	Complement C3 OS=Homo sapiens GN=C3 PE=1 SV=2	CO3_HUMAN	187	6.34	Homo sapiens	0.0167633	0.0114608	0.020015	0.0150921	0.0166116	0.00824132	0.0124284	0.00957532	0.00859684	0.00580795	0.0155295	0.0164463	0.0200156	0.0185767	0.0221767				41	0.177372	0.222364	0.106477	0.259888	0.191182	0.263794	0.225138	0.241714	0.318694	0.292588	0.11427	0.129987	0.106243	0.15612	0.108586
4	Ig gamma-1 chain C region OS=Homo sapiens GN=IGHG1 PE=1 SV=1	IGHG1_HUMAN	36	8.31	Homo sapiens	0.124061	0.0743245	0.024347	0.116409	0.0892203	0.0838113	0.0714138	0.0820852	0.135554	0.0881337	0.0191642	0.031157	0.023812	0.0486067	0.0231995				67	0.423174	0.514409	0.25936	0.601346	0.435302	0.480693	0.456093	0.507075	0.621121	0.548324	0.287246	0.286778	0.259863	0.326171	0.296159
5	Ig mu chain C region OS=Homo sapiens GN=IGHM PE=1 SV=3	IGHM_HUMAN	49	6.77	Homo sapiens	0.118328	0.0797114	0.0204716	0.0378109	0.201086	0.0481917	0.0631918	0.105936	0.0356206	0.0568044	0.0246063	0.0223677	0.0204706	0.0117821	0.0668101				111	0.647381	0.661677	0.487689	0.704051	0.705295	0.585528	0.594434	0.650888	0.721172	0.65505	0.447024	0.498182	0.488197	0.508002	0.494898
6	Serum albumin OS=Homo sapiens GN=ALB PE=1 SV=2	ALBU_HUMAN	69	6.21	Homo sapiens	0.0533163	0.0259784	0.021904	0.0229263	0.0321865	0.029701	0.0449469	0.0277131	0.0189676	0.0112116	0.0295127	0.0272757	0.0219047	0.0280799	0.0272206				158	0.879472	0.846398	0.858875	0.82653	0.881713	0.782981	0.777322	0.850628	0.921114	0.804041	0.761932	0.845593	0.858344	0.839643	0.862988
7	C4b-binding protein alpha chain OS=Homo sapiens GN=C4BPA PE=1 SV=2	C4BPA_HUMAN	67	7.31	Homo sapiens	0.0180365	0.00948648	0.0257821	0.00877566	0.0103601	0.00535279	0	0.0196419	0.00385134	0.0113412	0.059531	0.0323626	0.0257827	0.0302409	0.0634267				195	1	1	1	1	1	1	1	1	1	1	1	1	1	1	1
8	Keratin, type II cytoskeletal 1 OS=Homo sapiens GN=KRT1 PE=1 SV=6	K2C1_HUMAN	66	8.33	Homo sapiens	0.0204165	0.0475688	0.0102257	0.0474663	0.0363665	0.0694918	0.0514775	0.0550439	0.0192351	0.0568687	0.0301288	0.0151167	0.0100306	0.0154713	0.0101286
9	Complement C4-A OS=Homo sapiens GN=C4A PE=1 SV=2	CO4A_HUMAN	193	7.08	Homo sapiens	0.00659464	0.00535143	0.00969799	0.00321547	0.00455189	0.00371117	0.00294034	0.0030994	0.00195497	0.000928095	0.0117878	0.00931327	0.0096981	0.00901819	0.00833712
10	Prothrombin OS=Homo sapiens GN=F2 PE=1 SV=2	THRB_HUMAN	70	5.7	Homo sapiens	0	0	0.0312069	0	0	0	0	0	0	0	0.0140015	0.0286169	0.0312082	0.0168622	0.019539
11	Keratin, type I cytoskeletal 9 OS=Homo sapiens GN=KRT9 PE=1 SV=3	K1C9_HUMAN	62	4.89	Homo sapiens	0.0275579	0.0309865	0.00558888	0.0361175	0.0245412	0.0382105	0.0372096	0.0224232	0.0115192	0.0463698	0.0167793	0.00987511	0.00558949	0.012884	0.00724406
12	Apolipoprotein D OS=Homo sapiens GN=APOD PE=1 SV=1	APOD_HUMAN	21	4.79	Homo sapiens	0.0777828	0.0693257	0.0412202	0.0932567	0.00552039	0.0587484	0.0601542	0.0435084	0.0273953	0.0122022	0.117542	0.0498179	0.0412184	0.0431412	0.0840072					CHOL					DOPG					DOTAP
13	Fibrinogen beta chain OS=Homo sapiens GN=FGB PE=1 SV=2	FIBB_HUMAN	56	8.38	Homo sapiens	0	0.0102424	0.023466	0.0258227	0	0.00268971	0	0.00137061	0.00602262	0.00185233	0.0247887	0.0230995	0.0234677	0.0261906	0.0239804				N° prot	CHOL_A	CHOL_B	CHOL_C	CHOL_D	CHOL_E	DOPG_A	DOPG_B	DOPG_C	DOPG_D	DOPG_E	DOTAP_A	DOTAP_B	DOTAP_C	DOTAP_D	DOTAP_E
14	Ig kappa chain C region OS=Homo sapiens GN=IGKC PE=1 SV=1	IGKC_HUMAN	12	5.68	Homo sapiens	0.188988	0.157199	0.0288759	0.092183	0.150978	0.176032	0.166131	0.159395	0.165321	0.114006	0.0233349	0.0460674	0.028879	0.0479734	0.0809382			>9	14	0.0328945	0.0439221	0.0241154	0.0344367	0.030816	0.0490053	0.0439433	0.0501213	0.036591	0.0317605	0.0150362	0.0276574	0.0241168	0.0274217	0.00795394
15	Hyaluronan-binding protein 2 OS=Homo sapiens GN=HABP2 PE=1 SV=1	HABP2_HUMAN	63	6.52	Homo sapiens	0	0	0.0169206	0	0	0	0	0	0	0	0.0236867	0.0176949	0.0169222	0.0201556	0.0221051			08_09	27	0.144477	0.178442	0.082362	0.225452	0.160366	0.214789	0.181195	0.191593	0.282103	0.260827	0.0992334	0.10233	0.0821265	0.128699	0.100632
16	Complement factor H OS=Homo sapiens GN=CFH PE=1 SV=4	CFAH_HUMAN	139	6.59	Homo sapiens	0.00299187	0	0.00791677	0.00122068	0	0	0	0.000588466	0.00428066	0.00419667	0.00291482	0.00736874	0.0079166	0.0049195	0.00480925			07_08	26	0.245802	0.292045	0.152883	0.341458	0.244119	0.216899	0.230955	0.265361	0.302426	0.255737	0.172977	0.156791	0.153619	0.17005	0.187573
17	Keratin, type I cytoskeletal 10 OS=Homo sapiens GN=KRT10 PE=1 SV=6	K1C10_HUMAN	59	4.88	Homo sapiens	0.00965546	0.0205724	0.00553342	0.0226836	0.0199516	0.0408401	0.0192368	0.0222197	0.00874062	0.0300058	0.0131629	0.00647123	0.00553415	0.00723997	0.00498428			06_07	44	0.224207	0.147268	0.228329	0.102705	0.269993	0.104835	0.13834	0.143813	0.100051	0.106725	0.159777	0.211404	0.228334	0.181832	0.198739
18	Inter-alpha-trypsin inhibitor heavy chain H2 OS=Homo sapiens GN=ITIH2 PE=1 SV=2	ITIH2_HUMAN	106	6.85	Homo sapiens	0	0	0.0106634	0	0	0	0	0	0	0	0.00902378	0.00956359	0.0106639	0.00729088	0.00633391			05_06	47	0.232091	0.18472	0.371186	0.122479	0.176419	0.197453	0.182889	0.199741	0.199942	0.148992	0.314908	0.347411	0.370148	0.331641	0.36809
19	Inter-alpha-trypsin inhibitor heavy chain H1 OS=Homo sapiens GN=ITIH1 PE=1 SV=3	ITIH1_HUMAN	101	6.78	Homo sapiens	0	0	0.0115201	0	0	0	0	0	0	0	0.00354827	0.00903207	0.0115207	0.00747225	0.00554716			<5	37	0.120528	0.153602	0.141125	0.17347	0.118287	0.217019	0.222678	0.149372	0.0788862	0.195959	0.238068	0.154407	0.141656	0.160357	0.137012
20	Haptoglobin OS=Homo sapiens GN=HP PE=1 SV=1	HPT_HUMAN	45	6.56	Homo sapiens	0.0125438	0.00222091	0.0198615	0.00852434	0.00667368	0	0.00581182	0	0.0070568	0	0.00677896	0.0145103	0.0198638	0.0106559	0.0030873			tot	195	1	1	1	1	1	1	1	1	1	1	1	1	1	1	1
21	Ig lambda-2 chain C regions OS=Homo sapiens GN=IGLC2 PE=1 SV=1	LAC2_HUMAN	11	7.34	Homo sapiens	0.186735	0.187837	0.0238714	0.169629	0.169797	0.148905	0.142881	0.144649	0.111816	0.100299	0.0623563	0.046515	0.0238852	0.049274	0.102395
22	Fibrinogen gamma chain OS=Homo sapiens GN=FGG PE=1 SV=3	FIBG_HUMAN	52	5.32	Homo sapiens	0	0.00618061	0.0118038	0.00986244	0.00222939	0.00476901	0	0	0.00801404	0.00424963	0.0152484	0.0152301	0.0118048	0.0130128	0.0135014
23	Ig gamma-2 chain C region OS=Homo sapiens GN=IGHG2 PE=1 SV=2	IGHG2_HUMAN	36	7.66	Homo sapiens	0	0.0505739	0.0137651	0.0801395	0.0569072	0.0109313	0.033856	0.0487126	0.0798726	0.0561437	0.00211576	0.00947621	0.013958	0.0211819	0
24	Alpha-2-macroglobulin OS=Homo sapiens GN=A2M PE=1 SV=3	A2MG_HUMAN	163	6.43	Homo sapiens	0.00309508	0.000408756	0.00497569	0	0	0	0	0	0.00024185	0	0.00109486	0.00370005	0.00497578	0.0032755	0.00328451
25	Vitamin K-dependent protein S OS=Homo sapiens GN=PROS1 PE=1 SV=1	PROS_HUMAN	75	5.37	Homo sapiens	0	0	0.00988097	0	0	0	0	0	0	0	0.00749636	0.0093768	0.00988021	0.00581077	0.0082118
26	Apolipoprotein E OS=Homo sapiens GN=APOE PE=1 SV=1	APOE_HUMAN	36	5.42	Homo sapiens	0	0	0.0165305	0.00192777	0	0	0	0	0	0	0.0150231	0.0212368	0.0165305	0.0157621	0.00824793
27	Apolipoprotein A-I OS=Homo sapiens GN=APOA1 PE=1 SV=1	APOA1_HUMAN	31	5.5	Homo sapiens	0.00668699	0	0.021287	0.00434296	0	0	0.00286385	0	0	0	0.016756	0.021624	0.0212883	0.0157779	0.0147688
28	Thrombospondin-1 OS=Homo sapiens GN=THBS1 PE=1 SV=2	TSP1_HUMAN	129	4.51	Homo sapiens	0	0	0.00116093	0	0	0	0	0	0	0	0.00761171	0.0070428	0.00116125	0.0130034	0
29	CD5 antigen-like OS=Homo sapiens GN=CD5L PE=1 SV=1	CD5L_HUMAN	38	5.15	Homo sapiens	0.0186393	0.0198026	0.00740065	0.00634624	0.0232109	0.0162331	0.0114277	0.0314834	0.00887468	0.0152826	0.00616654	0.00972304	0.00740135	0.00748074	0.0211734
30	Apolipoprotein C-III OS=Homo sapiens GN=APOC3 PE=1 SV=1	APOC3_HUMAN	11	5.04	Homo sapiens	0	0	0.0464345	0	0	0	0	0	0	0	0.0217634	0.0218652	0.0464379	0.0217953	0.00757332
31	Cartilage oligomeric matrix protein OS=Homo sapiens GN=COMP PE=1 SV=2	COMP_HUMAN	83	4.16	Homo sapiens	0	0	0.00707533	0	0	0	0	0	0	0	0.00462367	0.00835715	0.00707631	0.00866403	0.00384289
32	Ceruloplasmin OS=Homo sapiens GN=CP PE=1 SV=1	CERU_HUMAN	122	5.5	Homo sapiens	0	0	0.00460098	0	0	0	0	0	0	0	0.00467388	0.00494726	0.00460135	0.00458587	0.00220643
33	Serum paraoxonase/arylesterase 1 OS=Homo sapiens GN=PON1 PE=1 SV=3	PON1_HUMAN	40	4.89	Homo sapiens	0	0	0.0153764	0	0	0	0	0	0	0	0.00139664	0.0135802	0.0153768	0.018414	0.00804532
34	Hornerin OS=Homo sapiens GN=HRNR PE=1 SV=2	HORN_HUMAN	282	10.24	Homo sapiens	0	0.00608551	0	0.00376765	0.000411093	0.00400606	0.0051008	0.000984578	0.000420635	0.00474393	0.00034985	0.000389152	0	0.000630959	0
35	Fibrinogen alpha chain OS=Homo sapiens GN=FGA PE=1 SV=2	FIBA_HUMAN	95	5.87	Homo sapiens	0	0	0.00619614	0.00400314	0	0	0	0	0	0	0.00409317	0.00549668	0.00619628	0.00355197	0.00505093
36	Clusterin OS=Homo sapiens GN=CLU PE=1 SV=1	CLUS_HUMAN	52	6.21	Homo sapiens	0	0	0.0102198	0	0	0	0	0	0	0	0.00499457	0.0102004	0.0102192	0.0123047	0.00309436
37	Kininogen-1 OS=Homo sapiens GN=KNG1 PE=1 SV=2	KNG1_HUMAN	72	6.8	Homo sapiens	0	0	0.00883936	0	0	0	0	0	0	0	0.00427218	0.00794482	0.00883876	0.00480493	0.00554701
38	Plasminogen OS=Homo sapiens GN=PLG PE=1 SV=2	PLMN_HUMAN	91	7.25	Homo sapiens	0	0	0.0050479	0.00373867	0	0	0	0	0.000872242	0.00034471	0.0016662	0.00582878	0.00504734	0.00575084	0.000915456
39	Keratin, type I cytoskeletal 14 OS=Homo sapiens GN=KRT14 PE=1 SV=4	K1C14_HUMAN	52	4.81	Homo sapiens	0.00553172	0.0150621	0.0021436	0.0170892	0	0.026691	0.0360605	0.0221824	0.00686212	0.0269248	0.00947984	0.00385146	0.00214319	0.00479285	0
40	Keratin, type II cytoskeletal 2 epidermal OS=Homo sapiens GN=KRT2 PE=1 SV=2	K22E_HUMAN	65	8.17	Homo sapiens	0	0.0230657	0.00291437	0.0200798	0	0.0365178	0.0247494	0.0215269	0.0021227	0.023813	0.0130304	0.00400982	0.00291491	0.00492926	0.0036676
41	Serotransferrin OS=Homo sapiens GN=TF PE=1 SV=3	TRFE_HUMAN	77	7.13	Homo sapiens	0	0.00501293	0.00475731	0.00313191	0	0	0.0107344	0.004137	0.00205784	0.00211695	0.00269929	0.00404995	0.00475715	0.00599351	0.00454002
42	Keratin, type II cytoskeletal 6A OS=Homo sapiens GN=KRT6A PE=1 SV=3	K2C6A_HUMAN	60	8.16	Homo sapiens	0	0.0112346	0.00045524	0.00916051	0.0107756	0.0222784	0.0335542	0.0153209	0.0042987	0.0255468	0.0121213	0.00252248	0.000454704	0.00222119	0
43	Apolipoprotein(a) OS=Homo sapiens GN=LPA PE=1 SV=1	APOA_HUMAN	501	5.77	Homo sapiens	0.00126546	0.00027629	0.000743902	0.00233644	0	0.000419256	0	0	0.000870667	0.000178332	0	0.000720117	0.000757453	0.00122393	0
44	Inter-alpha-trypsin inhibitor heavy chain H3 OS=Homo sapiens GN=ITIH3 PE=1 SV=2	ITIH3_HUMAN	100	5.49	Homo sapiens	0	0	0.00556109	0	0	0	0	0	0	0	0.0033553	0.00499789	0.00556139	0.00399543	0.00133166
45	Complement C5 OS=Homo sapiens GN=C5 PE=1 SV=4	CO5_HUMAN	188	6.49	Homo sapiens	0	0	0.00250632	0	0	0	0	0	0	0	0.000524775	0.00229841	0.00250642	0.00198563	0.000295713
46	Immunoglobulin lambda-like polypeptide 5 OS=Homo sapiens GN=IGLL5 PE=2 SV=2	IGLL5_HUMAN	23	9.05	Homo sapiens	0.0275465	0.0295958	0.00944325	0.0241458	0.0304049	0.0376904	0.0169491	0.0240339	0.0258701	0.0188443	0.00312258	0.0074547	0.00944259	0.00617081	0.00795394
47	Protein AMBP OS=Homo sapiens GN=AMBP PE=1 SV=1	AMBP_HUMAN	39	6.15	Homo sapiens	0	0	0.0134295	0	0	0	0	0	0	0	0.00727326	0.0126035	0.0134294	0.00683801	0.00547597
48	Fibronectin OS=Homo sapiens GN=FN1 PE=1 SV=4	FINC_HUMAN	263	5.45	Homo sapiens	0	0	0.00196904	0	0	0	0	0	0	0	0.000182052	0.00152477	0.00196887	0.00105004	0.00021117
49	Coagulation factor IX OS=Homo sapiens GN=F9 PE=1 SV=2	FA9_HUMAN	52	5.16	Homo sapiens	0	0	0.00742743	0	0	0	0	0	0	0	0.0028459	0.00872265	0.00742781	0.00667684	0.00821449
50	Apolipoprotein A-IV OS=Homo sapiens GN=APOA4 PE=1 SV=3	APOA4_HUMAN	45	5.05	Homo sapiens	0	0	0.00758911	0	0	0	0	0	0	0	0.00973734	0.00896187	0.0075882	0.00810005	0.00295736
51	Complement component C9 OS=Homo sapiens GN=C9 PE=1 SV=2	CO9_HUMAN	63	5.27	Homo sapiens	0	0	0.00333272	0	0	0	0	0	0	0	0.010974	0.00621275	0.0033327	0.00901995	0.0102158
52	Complement C1s subcomponent OS=Homo sapiens GN=C1S PE=1 SV=1	C1S_HUMAN	77	4.59	Homo sapiens	0	0	0.00467859	0	0	0	0	0	0	0	0.00266625	0.00366381	0.00467854	0.00460545	0.00241291
53	Alpha-1-antitrypsin OS=Homo sapiens GN=SERPINA1 PE=1 SV=3	A1AT_HUMAN	47	5.31	Homo sapiens	0	0	0.00834832	0	0	0	0	0	0	0	0	0.00701459	0.00834802	0.007197	0
54	Keratin, type II cytoskeletal 5 OS=Homo sapiens GN=KRT5 PE=1 SV=3	K2C5_HUMAN	62	7.91	Homo sapiens	0	0.0149722	0.00128566	0.0105495	0	0.0264601	0.027459	0.014818	0.00543979	0.0197245	0.0104198	0.0021531	0.00128559	0.00228692	0.00200705
55	Alpha-1-antichymotrypsin OS=Homo sapiens GN=SERPINA3 PE=1 SV=2	AACT_HUMAN	48	5.19	Homo sapiens	0	0	0.00736967	0	0	0	0	0	0	0	0	0.00629655	0.00737016	0.00388708	0.00155546
56	Ig alpha-1 chain C region OS=Homo sapiens GN=IGHA1 PE=1 SV=2	IGHA1_HUMAN	38	6.49	Homo sapiens	0.00365917	0.0121003	0.00535735	0.00257496	0.00619678	0.00811655	0.00688242	0	0.00626484	0.00352676	0.00480147	0.00553509	0.00535705	0.00467849	0.00773726
57	Coagulation factor X OS=Homo sapiens GN=F10 PE=1 SV=2	FA10_HUMAN	55	5.74	Homo sapiens	0	0	0.00535413	0	0	0	0	0	0	0	0.00421427	0.00529578	0.00535443	0.00386951	0.00585114
58	Ig gamma-3 chain C region OS=Homo sapiens GN=IGHG3 PE=1 SV=2	IGHG3_HUMAN	41	7.95	Homo sapiens	0.0271314	0	0.0156587	0.0238654	0	0.0134704	0	0.0157508	0.0749741	0.033916	0.0126691	0.0171859	0.0158141	0.0186254	0
59	C-reactive protein OS=Homo sapiens GN=CRP PE=1 SV=1	CRP_HUMAN	25	5.32	Homo sapiens	0	0	0.00341468	0	0	0	0	0	0	0	0.027742	0.0141381	0.0034144	0.0177677	0.00754701
60	Histidine-rich glycoprotein OS=Homo sapiens GN=HRG PE=1 SV=1	HRG_HUMAN	60	7.52	Homo sapiens	0	0	0.00501432	0	0	0	0	0	0	0.00273839	0	0.0026901	0.00501477	0.00222338	0.00231548
61	Complement C1q subcomponent subunit C OS=Homo sapiens GN=C1QC PE=1 SV=3	C1QC_HUMAN	26	8.58	Homo sapiens	0	0.00547951	0.00477814	0.00651275	0.0110171	0	0	0.0152803	0.0129775	0.0114239	0	0.00775568	0.00477811	0.00749331	0
62	Heparin cofactor 2 OS=Homo sapiens GN=SERPIND1 PE=1 SV=3	HEP2_HUMAN	57	6.89	Homo sapiens	0	0	0.00423993	0	0	0	0	0	0	0	0.00409183	0.00280782	0.00423984	0.00202236	0.00326053
63	Immunoglobulin J chain OS=Homo sapiens GN=IGJ PE=1 SV=4	IGJ_HUMAN	18	4.87	Homo sapiens	0	0.00769006	0.00690175	0	0.0422653	0	0.00959737	0.0199395	0	0.00992717	0.00999513	0.00401289	0.00690172	0.00296158	0.0134089
64	C4b-binding protein beta chain OS=Homo sapiens GN=C4BPB PE=1 SV=1	C4BPB_HUMAN	28	4.8	Homo sapiens	0	0	0.00795748	0	0	0	0	0	0	0	0.0119441	0.00646677	0.00795728	0.00537807	0.00851608
65	Vitamin K-dependent protein C OS=Homo sapiens GN=PROC PE=1 SV=1	PROC_HUMAN	52	6.23	Homo sapiens	0	0	0.00377589	0	0	0	0	0	0	0	0.000920761	0.00389521	0.00377593	0.00274252	0.000957208
66	Apolipoprotein C-II OS=Homo sapiens GN=APOC2 PE=1 SV=1	APOC2_HUMAN	11	4.36	Homo sapiens	0	0	0.0171921	0	0	0	0	0	0	0	0.012003	0.0202013	0.0171936	0.00569602	0
67	Beta-2-glycoprotein 1 OS=Homo sapiens GN=APOH PE=1 SV=3	APOH_HUMAN	38	8.03	Homo sapiens	0	0	0	0	0	0	0	0	0.0355189	0.00470234	0	0.00158833	0	0.00374578	0
68	Vitamin K-dependent protein Z OS=Homo sapiens GN=PROZ PE=1 SV=2	PROZ_HUMAN	45	5.87	Homo sapiens	0	0	0.00624944	0	0	0	0	0	0	0	0	0.00244885	0.00625002	0.00118171	0
69	Apolipoprotein M OS=Homo sapiens GN=APOM PE=1 SV=2	APOM_HUMAN	21	5.92	Homo sapiens	0	0	0.00939234	0	0	0	0	0	0	0	0	0.0072501	0.0093907	0.00548925	0
70	Keratin, type I cytoskeletal 16 OS=Homo sapiens GN=KRT16 PE=1 SV=4	K1C16_HUMAN	51	4.69	Homo sapiens	0	0.00522567	0	0	0	0.0312027	0.0350268	0	0	0.0274613	0.0111024	0	0	0.00488682	0
71	Alpha-2-HS-glycoprotein OS=Homo sapiens GN=AHSG PE=1 SV=1	FETUA_HUMAN	39	5.52	Homo sapiens	0	0	0.00671996	0	0	0	0	0	0	0	0.00399019	0.00362271	0.00671984	0.00182139	0
72	Alpha-1-acid glycoprotein 1 OS=Homo sapiens GN=ORM1 PE=1 SV=1	A1AG1_HUMAN	24	4.66	Homo sapiens	0	0	0.00738158	0	0	0	0	0	0	0	0	0.00794482	0.00738091	0.00331466	0.00231642
73	Serum amyloid A-2 protein OS=Homo sapiens GN=SAA2 PE=1 SV=1	SAA2_HUMAN	14	9.48	Homo sapiens	0	0	0.0135659	0	0	0	0	0	0	0	0.00943091	0.0106481	0.0135662	0.00952878	0
74	Transthyretin OS=Homo sapiens GN=TTR PE=1 SV=1	TTHY_HUMAN	16	5.58	Homo sapiens	0	0	0.0097894	0	0	0	0	0	0	0	0.00317364	0.0124894	0.00979067	0.00834641	0.0116121
75	Complement C1r subcomponent OS=Homo sapiens GN=C1R PE=1 SV=2	C1R_HUMAN	80	6.14	Homo sapiens	0	0	0.0017978	0	0	0	0	0	0	0	0	0.00127448	0.00179796	0.00199558	0
76	Properdin OS=Homo sapiens GN=CFP PE=1 SV=2	PROP_HUMAN	51	7.92	Homo sapiens	0	0.0110659	0.000401682	0.00204116	0	0	0.00338603	0.00308779	0.00272565	0.00525556	0	0	0.000401209	0	0.00217905
77	Protein Z-dependent protease inhibitor OS=Homo sapiens GN=SERPINA10 PE=1 SV=1	ZPI_HUMAN	51	8.58	Homo sapiens	0	0	0.00271164	0	0	0	0	0	0	0	0	0.00277019	0.00271119	0.00174023	0
78	Coagulation factor V OS=Homo sapiens GN=F5 PE=1 SV=4	FA5_HUMAN	252	5.95	Homo sapiens	0	0	0.000465387	0	0	0	0	0	0	0	0.00061753	0	0.000465565	0.000459623	0
79	Phosphatidylcholine-sterol acyltransferase OS=Homo sapiens GN=LCAT PE=1 SV=1	LCAT_HUMAN	50	6.04	Homo sapiens	0	0	0.00157886	0	0	0	0	0	0	0	0.00309046	0.00402381	0.00157876	0.00372617	0.00321813
80	Thrombospondin-4 OS=Homo sapiens GN=THBS4 PE=1 SV=2	TSP4_HUMAN	106	4.23	Homo sapiens	0	0	0.00178408	0	0	0	0	0	0	0	0.00218665	0.000465891	0.00178424	0.00142574	0.00052394
81	Complement component C6 OS=Homo sapiens GN=C6 PE=1 SV=3	CO6_HUMAN	105	6.74	Homo sapiens	0	0	0.00149597	0	0	0	0	0	0	0	0	0.00173749	0.00149599	0	0
82	Ficolin-3 OS=Homo sapiens GN=FCN3 PE=1 SV=2	FCN3_HUMAN	33	6.66	Homo sapiens	0	0	0.00455424	0	0.00723798	0	0	0	0	0.000871859	0	0.00333934	0.00455417	0.000524685	0.00487595
83	Complement component C8 alpha chain OS=Homo sapiens GN=C8A PE=1 SV=2	CO8A_HUMAN	65	6.41	Homo sapiens	0	0	0.00120206	0	0	0	0	0	0	0	0	0.00201889	0.00120216	0.00451275	0.0029027
84	Hemoglobin subunit beta OS=Homo sapiens GN=HBB PE=1 SV=2	HBB_HUMAN	16	7.32	Homo sapiens	0	0	0.00365881	0.00841449	0	0.00614886	0.00555278	0.0101575	0	0.00927516	0.00616611	0.00377229	0.00365845	0.00443963	0
85	Keratin, type I cytoskeletal 17 OS=Homo sapiens GN=KRT17 PE=1 SV=2	K1C17_HUMAN	48	4.67	Homo sapiens	0	0.00474001	0	0	0	0.0213264	0.0253927	0.0190986	0	0.0198348	0.0043831	0	0	0	0
86	Ig kappa chain V-III region HIC OS=Homo sapiens PE=1 SV=2	KV313_HUMAN	14	4.85	Homo sapiens	0	0	0.00519188	0	0.0170609	0	0	0	0	0.00224061	0	0	0.00518812	0.00191328	0
87	Retinol-binding protein 4 OS=Homo sapiens GN=RBP4 PE=1 SV=3	RET4_HUMAN	23	5.85	Homo sapiens	0	0	0.00738621	0	0	0	0	0	0	0	0	0.00302172	0.00738666	0.00234743	0
88	Serum amyloid P-component OS=Homo sapiens GN=APCS PE=1 SV=2	SAMP_HUMAN	25	6.52	Homo sapiens	0	0	0.00235782	0	0	0	0	0	0.00317496	0	0.00825583	0.0027985	0.00235736	0.00355566	0
89	Ig alpha-2 chain C region OS=Homo sapiens GN=IGHA2 PE=1 SV=3	IGHA2_HUMAN	37	6.02	Homo sapiens	0	0	0.00584825	0	0	0	0	0	0	0	0	0.00233657	0.00584817	0.00389123	0
90	Inter-alpha-trypsin inhibitor heavy chain H4 OS=Homo sapiens GN=ITIH4 PE=1 SV=4	ITIH4_HUMAN	103	6.97	Homo sapiens	0	0	0.00133873	0	0	0	0	0	0	0	0	0.00117197	0.00133856	0.000776338	0
91	Actin, cytoplasmic 1 OS=Homo sapiens GN=ACTB PE=1 SV=1	ACTB_HUMAN	42	5.15	Homo sapiens	0	0	0.00030391	0	0	0	0	0	0.00803999	0.000746871	0.00133013	0.00122999	0.000304404	0.00382732	0
92	Apolipoprotein A-II OS=Homo sapiens GN=APOA2 PE=1 SV=1	APOA2_HUMAN	11	6.6	Homo sapiens	0	0	0.0106324	0	0	0	0	0	0	0	0	0.0100596	0.0106348	0.00644495	0
93	Hemoglobin subunit alpha OS=Homo sapiens GN=HBA1 PE=1 SV=2	HBA_HUMAN	15	9.09	Homo sapiens	0	0	0	0.00652322	0	0.00730877	0	0.0158551	0	0.00287713	0	0	0	0	0
94	Alpha-1B-glycoprotein OS=Homo sapiens GN=A1BG PE=1 SV=4	A1BG_HUMAN	54	5.71	Homo sapiens	0	0	0.0025535	0	0	0	0	0	0	0	0	0.00185446	0.00255319	0.00115513	0
95	Filamin-A OS=Homo sapiens GN=FLNA PE=1 SV=4	FLNA_HUMAN	281	5.95	Homo sapiens	0	0.0012623	0	0.00147686	0	0	0	0	0.000635402	0.000566995	0	7.48388e-05	0	0.000282137	0
96	Lumican OS=Homo sapiens GN=LUM PE=1 SV=2	LUM_HUMAN	38	6.6	Homo sapiens	0	0	0.00308955	0	0	0	0	0	0	0	0.00125999	0.00235858	0.00308975	0.00140286	0
97	Mannan-binding lectin serine protease 1 OS=Homo sapiens GN=MASP1 PE=1 SV=3	MASP1_HUMAN	79	5.18	Homo sapiens	0	0	0.00215607	0	0	0	0	0	0	0	0	0	0.00215596	0.00146437	0
98	Dermcidin OS=Homo sapiens GN=DCD PE=1 SV=2	DCD_HUMAN	11	6.52	Homo sapiens	0.0135092	0.00908554	0	0.0128387	0	0.0091287	0	0	0.00363205	0.0108756	0	0	0	0.00322284	0
99	Gelsolin OS=Homo sapiens GN=GSN PE=1 SV=1	GELS_HUMAN	86	6.19	Homo sapiens	0	0	0.00114203	0	0	0	0	0	0	0	0	0.00151534	0.0011419	0.00124451	0
100	Secreted phosphoprotein 24 OS=Homo sapiens GN=SPP2 PE=1 SV=1	SPP24_HUMAN	24	8.46	Homo sapiens	0	0	0.00409054	0	0	0	0	0	0	0	0	0.00586808	0.00409059	0.00519225	0
101	Beta-Ala-His dipeptidase OS=Homo sapiens GN=CNDP1 PE=1 SV=4	CNDP1_HUMAN	57	4.95	Homo sapiens	0	0	0.0011461	0	0	0	0	0	0	0	0	0.000368942	0.00114608	0.00373605	0
102	Complement component C8 beta chain OS=Homo sapiens GN=C8B PE=1 SV=3	CO8B_HUMAN	67	8.17	Homo sapiens	0	0	0.000789946	0	0	0	0	0	0	0	0	0.00149464	0.000789714	0.00225982	0
103	Pigment epithelium-derived factor OS=Homo sapiens GN=SERPINF1 PE=1 SV=4	PEDF_HUMAN	46	6.33	Homo sapiens	0	0	0.00228355	0	0	0	0	0	0	0	0	0.00134168	0.00228313	0.000376405	0
104	Calreticulin OS=Homo sapiens GN=CALR PE=1 SV=1	CALR_HUMAN	48	4.04	Homo sapiens	0	0	0.0013703	0	0	0	0	0	0	0	0.00321923	0.00167661	0.00136988	0.00184916	0
105	Hemopexin OS=Homo sapiens GN=HPX PE=1 SV=2	HEMO_HUMAN	52	7.02	Homo sapiens	0	0	0.00201068	0	0	0	0	0	0	0	0	0.000976083	0.0020109	0.00136351	0
106	Complement component C8 gamma chain OS=Homo sapiens GN=C8G PE=1 SV=3	CO8G_HUMAN	22	8.48	Homo sapiens	0	0	0.00325954	0	0	0	0	0	0	0	0	0.00322143	0.00325995	0.0048339	0
107	Tropomyosin alpha-4 chain OS=Homo sapiens GN=TPM4 PE=1 SV=3	TPM4_HUMAN	29	4.36	Homo sapiens	0	0	0	0	0	0	0	0	0	0	0.00175097	0.00416252	0	0.00855155	0
108	Alpha-2-antiplasmin OS=Homo sapiens GN=SERPINF2 PE=1 SV=3	A2AP_HUMAN	55	6.24	Homo sapiens	0	0	0.0021412	0	0	0	0	0	0	0	0	0.000548594	0.00214145	0.000314811	0
109	Phosphatidylinositol-glycan-specific phospholipase D OS=Homo sapiens GN=GPLD1 PE=1 SV=3	PHLD_HUMAN	92	6.33	Homo sapiens	0	0	0.00113602	0	0	0	0	0	0	0	0	0.00119284	0.00113628	0.000479353	0
110	Antithrombin-III OS=Homo sapiens GN=SERPINC1 PE=1 SV=1	ANT3_HUMAN	53	6.68	Homo sapiens	0	0	0.00248047	0	0	0	0	0	0	0	0	0.000742016	0.00248019	0	0
111	Desmoplakin OS=Homo sapiens GN=DSP PE=1 SV=3	DESP_HUMAN	332	6.78	Homo sapiens	0	0	0	0	0	0	0	0	0	0.00112303	0	0	0	0	0
112	Angiotensinogen OS=Homo sapiens GN=AGT PE=1 SV=1	ANGT_HUMAN	53	6.27	Homo sapiens	0	0	0.00235163	0	0	0	0	0	0	0	0	0.00169968	0.0023515	0	0
113	Calmodulin-like protein 5 OS=Homo sapiens GN=CALML5 PE=1 SV=2	CALL5_HUMAN	16	4.05	Homo sapiens	0	0	0	0	0	0	0	0	0.0074395	0.00935632	0	0	0	0	0
114	Vitamin D-binding protein OS=Homo sapiens GN=GC PE=1 SV=1	VTDB_HUMAN	53	5.21	Homo sapiens	0	0	0.00112745	0	0	0	0	0	0	0	0	0.00226046	0.00112701	0.00133251	0
115	Ig heavy chain V-III region 23 OS=Homo sapiens GN=IGHV3-23 PE=1 SV=2	HV303_HUMAN	13	8.46	Homo sapiens	0	0	0.00203884	0	0.0129868	0	0	0	0.0213768	0.0206013	0	0	0.00253127	0.00206045	0
116	Ficolin-2 OS=Homo sapiens GN=FCN2 PE=1 SV=2	FCN2_HUMAN	34	6.77	Homo sapiens	0	0.0063018	0	0	0	0	0.00507904	0	0.00409976	0.00262778	0.0016431	0	0	0	0
117	Complement factor H-related protein 1 OS=Homo sapiens GN=CFHR1 PE=1 SV=2	FHR1_HUMAN	38	7.42	Homo sapiens	0	0	0.00279295	0	0	0	0	0	0.00730148	0	0	0.00209405	0.00279296	0.00142081	0
118	Complement C1q subcomponent subunit A OS=Homo sapiens GN=C1QA PE=1 SV=2	C1QA_HUMAN	26	9.45	Homo sapiens	0.00534802	0.00824082	0	0	0	0	0	0.00609812	0	0.00343633	0	0.00158249	0	0.00239911	0
119	Platelet factor 4 OS=Homo sapiens GN=PF4 PE=1 SV=2	PLF4_HUMAN	11	8.78	Homo sapiens	0	0.00652671	0	0	0	0	0	0	0.0234582	0	0	0	0	0	0
120	Ig heavy chain V-I region V35 OS=Homo sapiens PE=1 SV=1	HV103_HUMAN	13	9.87	Homo sapiens	0	0	0	0	0	0	0.0201178	0	0	0	0	0.00154732	0	0	0
121	Ig gamma-4 chain C region OS=Homo sapiens GN=IGHG4 PE=1 SV=1	IGHG4_HUMAN	36	7.41	Homo sapiens	0	0	0.00904965	0	0	0	0	0	0	0.0109517	0	0.00453611	0.0094188	0	0
122	Integrin beta-3 OS=Homo sapiens GN=ITGB3 PE=1 SV=2	ITB3_HUMAN	87	4.85	Homo sapiens	0	0	0	0.00432335	0	0	0	0	0.00113891	0	0	0	0	0.00080543	0
123	Serum paraoxonase/lactonase 3 OS=Homo sapiens GN=PON3 PE=1 SV=3	PON3_HUMAN	40	5.1	Homo sapiens	0	0	0.00159971	0	0	0	0	0	0	0	0	0.000720441	0.00160105	0.00132942	0
124	Ig lambda chain V-I region HA OS=Homo sapiens PE=1 SV=1	LV102_HUMAN	12	5.69	Homo sapiens	0	0	0.00220875	0	0	0	0	0	0.00332938	0	0	0	0.00113676	0	0
125	Galectin-3-binding protein OS=Homo sapiens GN=LGALS3BP PE=1 SV=1	LG3BP_HUMAN	65	4.9	Homo sapiens	0	0	0	0	0.0089473	0	0	0	0	0.000442636	0	0.000309463	0	0	0.00170972
126	Complement C4-B OS=Homo sapiens GN=C4B PE=1 SV=2	CO4B_HUMAN	193	7.28	Homo sapiens	0	0	0.00990377	0	0	0	0	0	0	0	0	0.0063595	0.00990379	0.0092944	0
127	Complement C1q subcomponent subunit B OS=Homo sapiens GN=C1QB PE=1 SV=3	C1QB_HUMAN	27	8.87	Homo sapiens	0	0	0.000978571	0	0	0	0	0	0	0	0	0.00372585	0.000978744	0.00395395	0
128	Mannan-binding lectin serine protease 2 OS=Homo sapiens GN=MASP2 PE=1 SV=4	MASP2_HUMAN	76	5.37	Homo sapiens	0	0	0.000943001	0	0	0	0	0	0	0	0	0.000529493	0.000943283	0.000473604	0
129	Alpha-1-acid glycoprotein 2 OS=Homo sapiens GN=ORM2 PE=1 SV=2	A1AG2_HUMAN	24	4.76	Homo sapiens	0	0	0.00599442	0	0	0	0	0	0	0	0	0.00120073	0.00599441	0	0
130	Complement factor I OS=Homo sapiens GN=CFI PE=1 SV=2	CFAI_HUMAN	66	7.53	Homo sapiens	0	0	0.00139627	0	0	0	0	0	0	0	0	0.000595861	0.00139623	0	0
131	Endoplasmin OS=Homo sapiens GN=HSP90B1 PE=1 SV=1	ENPL_HUMAN	92	4.48	Homo sapiens	0	0	0.000208113	0	0	0	0	0	0	0	0	0	0.000208451	0	0
132	Ezrin OS=Homo sapiens GN=EZR PE=1 SV=4	EZRI_HUMAN	69	6.17	Homo sapiens	0	0	0	0	0	0.0014553	0	0	0	0	0	0	0	0	0
133	Ig heavy chain V-III region GA OS=Homo sapiens PE=1 SV=1	HV308_HUMAN	13	10.02	Homo sapiens	0	0	0	0	0	0	0	0	0	0	0	0	0	0.00139513	0
134	Apolipoprotein F OS=Homo sapiens GN=APOF PE=1 SV=2	APOF_HUMAN	35	5.36	Homo sapiens	0	0	0.00186531	0	0	0	0	0	0	0	0	0.00112362	0.00186563	0	0
135	Haptoglobin-related protein OS=Homo sapiens GN=HPR PE=2 SV=2	HPTR_HUMAN	39	7.11	Homo sapiens	0	0	0.00722283	0	0	0	0	0	0	0	0	0	0.00722783	0	0
136	Nephronectin OS=Homo sapiens GN=NPNT PE=2 SV=3	NPNT_HUMAN	62	8.38	Homo sapiens	0	0	0	0	0	0	0	0	0.000635831	0	0	0	0	0	0
137	Integrin alpha-IIb OS=Homo sapiens GN=ITGA2B PE=1 SV=3	ITA2B_HUMAN	113	5.03	Homo sapiens	0	0	0	0	0	0	0	0	0	0	0	0	0	0.000469284	0
138	Lipopolysaccharide-binding protein OS=Homo sapiens GN=LBP PE=1 SV=3	LBP_HUMAN	53	6.68	Homo sapiens	0	0	0	0	0	0	0	0	0.00449177	0.0022286	0	0	0	0	0
139	Sodium/potassium-transporting ATPase subunit alpha-2 OS=Homo sapiens GN=ATP1A2 PE=1 SV=1	AT1A2_HUMAN	112	5.33	Homo sapiens	0	0	0	0	0	0	0	0	0	0	0	0	0	0	0.000940793
140	Lysozyme C OS=Homo sapiens GN=LYZ PE=1 SV=1	LYSC_HUMAN	17	9.35	Homo sapiens	0	0	0	0	0	0	0	0	0.00465173	0.00169243	0	0	0	0	0
141	Serum amyloid A-4 protein OS=Homo sapiens GN=SAA4 PE=1 SV=2	SAA4_HUMAN	15	9.38	Homo sapiens	0	0	0.000850949	0	0	0	0	0	0	0	0	0.00603566	0.000852332	0.00531276	0
142	Ig lambda-7 chain C region OS=Homo sapiens GN=IGLC7 PE=4 SV=2	LAC7_HUMAN	11	8.48	Homo sapiens	0	0	0	0	0	0	0	0	0	0	0	0	0	0	0.0294124
143	Selenoprotein P OS=Homo sapiens GN=SEPP1 PE=1 SV=3	SEPP1_HUMAN	43	7.92	Homo sapiens	0	0	0.00106166	0	0	0	0	0	0	0	0	0	0.00106191	0.000415285	0
144	Collectin-11 OS=Homo sapiens GN=COLEC11 PE=1 SV=1	COL11_HUMAN	29	5.06	Homo sapiens	0	0	0.00135411	0	0	0	0	0	0	0	0	0.00312189	0.00135413	0	0
145	Lipocalin-1 OS=Homo sapiens GN=LCN1 PE=1 SV=1	LCN1_HUMAN	19	5.3	Homo sapiens	0	0	0	0	0	0	0	0	0	0.00153709	0	0	0	0	0
146	Prenylcysteine oxidase 1 OS=Homo sapiens GN=PCYOX1 PE=1 SV=3	PCYOX_HUMAN	57	6.1	Homo sapiens	0	0	0	0.00171664	0	0	0	0	0	0	0	0	0	0.00109202	0
147	Ig heavy chain V-III region GAL OS=Homo sapiens PE=1 SV=1	HV320_HUMAN	13	8.7	Homo sapiens	0	0	0	0	0	0	0	0	0.0121887	0.00241297	0	0	0	0	0
148	Ig lambda chain V-III region LOI OS=Homo sapiens PE=1 SV=1	LV302_HUMAN	12	4.72	Homo sapiens	0	0	0.0027778	0	0	0	0	0	0.0066342	0	0	0	0.00331059	0	0
149	Serglycin OS=Homo sapiens GN=SRGN PE=1 SV=3	SRGN_HUMAN	18	4.57	Homo sapiens	0	0	0	0	0	0	0	0	0	0	0.00822148	0.0039373	0	0.00195399	0
150	Filaggrin-2 OS=Homo sapiens GN=FLG2 PE=1 SV=1	FILA2_HUMAN	248	8.35	Homo sapiens	0	0	0	0	0	0	0	0.000964814	0	0.000662514	0	0	0	0	0
151	Keratin, type I cytoskeletal 13 OS=Homo sapiens GN=KRT13 PE=1 SV=4	K1C13_HUMAN	50	4.61	Homo sapiens	0	0	0	0	0	0	0	0	0	0.0101459	0	0	0	0	0
152	Apolipoprotein C-I OS=Homo sapiens GN=APOC1 PE=1 SV=1	APOC1_HUMAN	9	9.17	Homo sapiens	0	0	0	0	0	0	0	0	0	0	0	0	0	0.00198414	0
153	Pre-mRNA-splicing factor CWC25 homolog OS=Homo sapiens GN=CWC25 PE=1 SV=1	CWC25_HUMAN	50	10.9	Homo sapiens	0	0	0	0	0	0	0.00177559	0.00314954	0	0	0	0	0	0	0
154	Glutathione peroxidase 3 OS=Homo sapiens GN=GPX3 PE=1 SV=2	GPX3_HUMAN	26	8.29	Homo sapiens	0	0	0.00151035	0	0	0	0	0	0	0	0	0	0.00151037	0	0
155	Ig kappa chain V-I region HK102 (Fragment) OS=Homo sapiens GN=IGKV1-5 PE=4 SV=1	KV110_HUMAN	13	8.46	Homo sapiens	0	0	0	0	0	0	0	0	0	0.00668954	0	0	0	0	0.0102435
156	Ig heavy chain V-II region ARH-77 OS=Homo sapiens PE=4 SV=1	HV209_HUMAN	16	8.45	Homo sapiens	0	0	0	0	0	0	0	0	0.00499406	0	0	0	0	0	0
157	Erythrocyte band 7 integral membrane protein OS=Homo sapiens GN=STOM PE=1 SV=3	STOM_HUMAN	32	8.07	Homo sapiens	0	0	0	0	0	0	0	0	0.00371975	0	0	0	0	0	0
158	Coagulation factor VII OS=Homo sapiens GN=F7 PE=1 SV=1	FA7_HUMAN	52	7.23	Homo sapiens	0	0	0.000508104	0	0	0	0	0	0	0	0	0	0.000508194	0	0
159	Junction plakoglobin OS=Homo sapiens GN=JUP PE=1 SV=3	PLAK_HUMAN	82	6.05	Homo sapiens	0	0	0	0	0	0	0	0	0	0.00145627	0	0	0	0	0
160	Amyloid beta A4 protein OS=Homo sapiens GN=APP PE=1 SV=3	A4_HUMAN	87	4.45	Homo sapiens	0	0	0	0	0	0	0	0	0	0	0	0.000241721	0	0.0012286	0
161	Elongation factor 1-alpha 1 OS=Homo sapiens GN=EEF1A1 PE=1 SV=1	EF1A1_HUMAN	50	9.5	Homo sapiens	0	0	0.000255285	0	0	0	0	0	0	0	0.00213287	0	0.0002557	0	0
162	Aggrecan core protein OS=Homo sapiens GN=ACAN PE=1 SV=2	PGCA_HUMAN	250	3.82	Homo sapiens	0	0	0.00010602	0	0	0	0	0	0	0	0	0	0.000105939	7.1429e-05	0
163	Heat shock 70 kDa protein 1-like OS=Homo sapiens GN=HSPA1L PE=1 SV=2	HS71L_HUMAN	70	5.82	Homo sapiens	0	0	0.000378643	0	0	0	0	0	0	0	0.000725403	0	0.000378353	0	0
164	Ig kappa chain V-IV region (Fragment) OS=Homo sapiens GN=IGKV4-1 PE=4 SV=1	KV401_HUMAN	13	4.85	Homo sapiens	0	0	0	0	0	0	0	0	0.0091563	0	0	0	0	0	0
165	Angiopoietin-related protein 6 OS=Homo sapiens GN=ANGPTL6 PE=1 SV=1	ANGL6_HUMAN	52	8.64	Homo sapiens	0	0	0.000615272	0	0	0	0	0	0	0	0	0	0.00061579	0	0
166	Desmocollin-1 OS=Homo sapiens GN=DSC1 PE=1 SV=2	DSC1_HUMAN	100	5.08	Homo sapiens	0	0	0	0	0	0	0	0	0	0.000893445	0	0	0	0	0
167	14-3-3 protein zeta/delta OS=Homo sapiens GN=YWHAZ PE=1 SV=1	1433Z_HUMAN	28	4.43	Homo sapiens	0	0	0	0	0	0	0	0	0	0	0	0	0	0.00253194	0
168	Apolipoprotein L1 OS=Homo sapiens GN=APOL1 PE=1 SV=5	APOL1_HUMAN	44	5.55	Homo sapiens	0	0	0.000728089	0	0	0	0	0	0	0	0	0	0.000728418	0	0
169	Carboxypeptidase N catalytic chain OS=Homo sapiens GN=CPN1 PE=1 SV=1	CBPN_HUMAN	52	7.36	Homo sapiens	0	0	0.000245466	0	0	0	0	0	0	0	0	0	0.000245865	0	0
170	Complement component C7 OS=Homo sapiens GN=C7 PE=1 SV=2	CO7_HUMAN	94	6.44	Homo sapiens	0	0	0.000281079	0	0	0	0	0	0	0	0	0	0.000281129	0	0
171	Neutrophil defensin 1 OS=Homo sapiens GN=DEFA1 PE=1 SV=1	DEF1_HUMAN	10	7.04	Homo sapiens	0	0	0	0.0134632	0	0	0	0	0.00790794	0	0	0	0	0	0
172	Filaggrin OS=Homo sapiens GN=FLG PE=1 SV=3	FILA_HUMAN	435	9.6	Homo sapiens	0	0	0	0	0	0	0	0	0	0.000166349	0	0	0	0	0
173	Plasma kallikrein OS=Homo sapiens GN=KLKB1 PE=1 SV=1	KLKB1_HUMAN	71	8.26	Homo sapiens	0	0	0.000180955	0	0	0	0	0	0	0	0	0	0.000180896	0	0
174	Tubulin alpha-4A chain OS=Homo sapiens GN=TUBA4A PE=1 SV=1	TBA4A_HUMAN	50	4.69	Homo sapiens	0	0	0	0	0	0	0	0	0	0	0	0.000402302	0	0.000719878	0
175	Extracellular superoxide dismutase [Cu-Zn] OS=Homo sapiens GN=SOD3 PE=1 SV=2	SODE_HUMAN	26	6.59	Homo sapiens	0	0	0	0	0	0	0	0	0	0	0.00195301	0	0	0.000686817	0
176	Fibulin-1 OS=Homo sapiens GN=FBLN1 PE=1 SV=4	FBLN1_HUMAN	77	4.86	Homo sapiens	0	0	0	0	0	0	0	0	0	0	0	0	0	0.000224865	0
177	Complement factor B OS=Homo sapiens GN=CFB PE=1 SV=2	CFAB_HUMAN	86	7.07	Homo sapiens	0	0	0	0	0	0	0	0	0	0	0	0	0	0.000201333	0
178	Afamin OS=Homo sapiens GN=AFM PE=1 SV=1	AFAM_HUMAN	69	5.7	Homo sapiens	0	0	0.000464289	0	0	0	0	0	0	0	0	0	0.000464499	0	0
179	Phospholipid transfer protein OS=Homo sapiens GN=PLTP PE=1 SV=1	PLTP_HUMAN	55	7.01	Homo sapiens	0	0	0.000233596	0	0	0	0	0	0	0	0	0	0.00023352	0	0
180	Desmoglein-1 OS=Homo sapiens GN=DSG1 PE=1 SV=2	DSG1_HUMAN	114	4.66	Homo sapiens	0	0	0	0	0	0	0	0	0	0.0010475	0	0	0	0	0
181	Collectin-10 OS=Homo sapiens GN=COLEC10 PE=2 SV=2	COL10_HUMAN	31	7.39	Homo sapiens	0	0	0	0	0	0	0	0	0	0	0	0.000678378	0	0	0
182	Small proline-rich protein 2A OS=Homo sapiens GN=SPRR2A PE=1 SV=1	SPR2A_HUMAN	8	8.49	Homo sapiens	0	0	0	0	0	0	0	0	0	0.0147916	0	0	0	0	0
183	Glyceraldehyde-3-phosphate dehydrogenase OS=Homo sapiens GN=GAPDH PE=1 SV=3	G3P_HUMAN	36	8.73	Homo sapiens	0	0	0	0	0	0	0	0	0	0.00161044	0	0	0	0	0
184	Keratin, type II cytoskeletal 78 OS=Homo sapiens GN=KRT78 PE=2 SV=2	K2C78_HUMAN	57	5.83	Homo sapiens	0	0	0	0	0	0	0	0	0	0.00211017	0	0	0	0	0
185	Alpha-amylase 1 OS=Homo sapiens GN=AMY1A PE=1 SV=2	AMY1_HUMAN	58	6.92	Homo sapiens	0	0	0	0	0	0	0	0	0.000683757	0	0	0	0	0	0
186	Glucosidase 2 subunit beta OS=Homo sapiens GN=PRKCSH PE=1 SV=2	GLU2B_HUMAN	59	4.05	Homo sapiens	0	0	0	0	0	0	0	0	0	0	0	0.000356436	0	0	0
187	Dickkopf-related protein 3 OS=Homo sapiens GN=DKK3 PE=1 SV=2	DKK3_HUMAN	38	4.3	Homo sapiens	0	0	0.000335901	0	0	0	0	0	0	0	0	0	0.000336447	0	0
188	Keratin, type II cytoskeletal 4 OS=Homo sapiens GN=KRT4 PE=1 SV=4	K2C4_HUMAN	57	6.55	Homo sapiens	0	0	0	0	0	0	0	0	0	0.00599463	0	0	0	0	0
189	Trypsin-1 OS=Homo sapiens GN=PRSS1 PE=1 SV=1	TRY1_HUMAN	27	6.49	Homo sapiens	0	0	0	0	0	0	0	0	0.00293978	0	0	0	0	0	0
190	Integrin beta-1 OS=Homo sapiens GN=ITGB1 PE=1 SV=2	ITB1_HUMAN	88	5.04	Homo sapiens	0	0	0	0	0	0	0	0	0.000447972	0	0	0	0	0	0
191	Prolactin-inducible protein OS=Homo sapiens GN=PIP PE=1 SV=1	PIP_HUMAN	17	8.18	Homo sapiens	0	0	0	0	0	0	0	0	0	0.00171792	0	0	0	0	0
192	Extracellular glycoprotein lacritin OS=Homo sapiens GN=LACRT PE=1 SV=1	LACRT_HUMAN	14	5.2	Homo sapiens	0	0	0	0	0	0	0	0	0	0.00638175	0	0	0	0	0
193	Suprabasin OS=Homo sapiens GN=SBSN PE=1 SV=2	SBSN_HUMAN	61	7.01	Homo sapiens	0	0	0	0	0	0	0	0	0	0.00146466	0	0	0	0	0
194	Platelet basic protein OS=Homo sapiens GN=PPBP PE=1 SV=3	CXCL7_HUMAN	14	9.07	Homo sapiens	0	0	0	0	0	0	0	0	0.00564853	0	0	0	0	0	0
195	Tubulin beta-1 chain OS=Homo sapiens GN=TUBB1 PE=1 SV=1	TBB1_HUMAN	50	4.82	Homo sapiens	0	0	0	0	0	0	0	0	0	0	0	0	0	0.000362733	0

## Sheet: Top25-Pancreas
						CHOL					DOPG					DOTAP
						4.70159	9.36073	50.9777	9.70261	5.69907	6.49879	7.65273	8.36491	16.8027	22.4171	12.9954	33.1816	50.9743	37.5314	12.4631
#	Identified Proteins (195)	Accession Number	Molecular Weight	pI	Taxonomy	CHOL_A	CHOL_B	CHOL_C	CHOL_D	CHOL_E	DOPG_A	DOPG_B	DOPG_C	DOPG_D	DOPG_E	DOTAP_A	DOTAP_B	DOTAP_C	DOTAP_D	DOTAP_E
2	Vitronectin OS=Homo sapiens GN=VTN PE=1 SV=1	VTNC_HUMAN	54	5.54	Homo sapiens	0.0165112	0	0.0801733	0	0	0	0.00246609	0.00886199	0.00440859	0.00303864	0.117463	0.0595932	0.08018	0.0862606	0.136442
21	Ig lambda-2 chain C regions OS=Homo sapiens GN=IGLC2 PE=1 SV=1	LAC2_HUMAN	11	7.34	Homo sapiens	0.186735	0.187837	0.0238714	0.169629	0.169797	0.148905	0.142881	0.144649	0.111816	0.100299	0.0623563	0.046515	0.0238852	0.049274	0.102395				0	0	0	0	0	0	0	0	0	0	0	0	0	0	0				0	0	0	0	0	0	0	0
12	Apolipoprotein D OS=Homo sapiens GN=APOD PE=1 SV=1	APOD_HUMAN	21	4.79	Homo sapiens	0.0777828	0.0693257	0.0412202	0.0932567	0.00552039	0.0587484	0.0601542	0.0435084	0.0273953	0.0122022	0.117542	0.0498179	0.0412184	0.0431412	0.0840072				0.144477	0.132136	0.0580386	0.189698	0.125587	0.155993	0.122891	0.1385	0.160812	0.153544	0.0740817	0.0693732	0.0573103	0.0902687	0.0969644				0.0233579	0.0168122	0.029713	0.0183075	0.0211635	0.0119525	0.0153687	0.0126747
14	Ig kappa chain C region OS=Homo sapiens GN=IGKC PE=1 SV=1	IGKC_HUMAN	12	5.68	Homo sapiens	0.188988	0.157199	0.0288759	0.092183	0.150978	0.176032	0.166131	0.159395	0.165321	0.114006	0.0233349	0.0460674	0.028879	0.0479734	0.0809382				0.355844	0.334811	0.11739	0.371319	0.310296	0.313962	0.268713	0.30589	0.278434	0.266112	0.207757	0.157564	0.116676	0.178802	0.271123				0.0233579	0.0168122	0.029713	0.0183075	0.0211635	0.0119525	0.0153687	0.0126747
5	Ig mu chain C region OS=Homo sapiens GN=IGHM PE=1 SV=3	IGHM_HUMAN	49	6.77	Homo sapiens	0.118328	0.0797114	0.0204716	0.0378109	0.201086	0.0481917	0.0631918	0.105936	0.0356206	0.0568044	0.0246063	0.0223677	0.0204706	0.0117821	0.0668101				0.544251	0.451962	0.196701	0.447148	0.560181	0.400096	0.38928	0.449114	0.341619	0.339936	0.301092	0.241349	0.195989	0.257396	0.409436				0.0233579	0.0168122	0.029713	0.0183075	0.0211635	0.0119525	0.0153687	0.0126747
7	C4b-binding protein alpha chain OS=Homo sapiens GN=C4BPA PE=1 SV=2	C4BPA_HUMAN	67	7.31	Homo sapiens	0.0180365	0.00948648	0.0257821	0.00877566	0.0103601	0.00535279	0	0.0196419	0.00385134	0.0113412	0.059531	0.0323626	0.0257827	0.0302409	0.0634267				0.775077	0.635144	0.414529	0.561811	0.736599	0.59713	0.572168	0.648855	0.528238	0.476513	0.526079	0.470865	0.413833	0.484569	0.734089				0.0233579	0.0168122	0.0609199	0.0183075	0.0211635	0.0119525	0.0153687	0.0126747
142	Ig lambda-7 chain C region OS=Homo sapiens GN=IGLC7 PE=4 SV=2	LAC7_HUMAN	11	8.48	Homo sapiens	0	0	0	0	0	0	0	0	0	0	0	0	0	0	0.0294124				0.85286	0.712159	0.470608	0.655068	0.784385	0.655878	0.64192	0.712303	0.555633	0.498643	0.66556	0.531163	0.46991	0.53605	0.840021				0.115127	0.099846	0.139085	0.0974758	0.100077	0.116498	0.111793	0.115074
6	Serum albumin OS=Homo sapiens GN=ALB PE=1 SV=2	ALBU_HUMAN	69	6.21	Homo sapiens	0.0533163	0.0259784	0.021904	0.0229263	0.0321865	0.029701	0.0449469	0.0277131	0.0189676	0.0112116	0.0295127	0.0272757	0.0219047	0.0280799	0.0272206																						0.131638	0.116269	0.261955	0.133161	0.102306	0.123957	0.114259	0.125306
13	Fibrinogen beta chain OS=Homo sapiens GN=FGB PE=1 SV=2	FIBB_HUMAN	56	8.38	Homo sapiens	0	0.0102424	0.023466	0.0258227	0	0.00268971	0	0.00137061	0.00602262	0.00185233	0.0247887	0.0230995	0.0234677	0.0261906	0.0239804																						0.249967	0.19598	0.282427	0.170972	0.303392	0.172148	0.177451	0.231242
4	Ig gamma-1 chain C region OS=Homo sapiens GN=IGHG1 PE=1 SV=1	IGHG1_HUMAN	36	8.31	Homo sapiens	0.124061	0.0743245	0.024347	0.116409	0.0892203	0.0838113	0.0714138	0.0820852	0.135554	0.0881337	0.0191642	0.031157	0.023812	0.0486067	0.0231995																						0.399354	0.290107	0.351992	0.299998	0.415824	0.272193	0.263156	0.344811
3	Complement C3 OS=Homo sapiens GN=C3 PE=1 SV=2	CO3_HUMAN	187	6.34	Homo sapiens	0.0167633	0.0114608	0.020015	0.0150921	0.0166116	0.00824132	0.0124284	0.00957532	0.00859684	0.00580795	0.0155295	0.0164463	0.0200156	0.0185767	0.0221767																						0.477137	0.359433	0.40117	0.393255	0.421344	0.330941	0.32331	0.388319
15	Hyaluronan-binding protein 2 OS=Homo sapiens GN=HABP2 PE=1 SV=1	HABP2_HUMAN	63	6.52	Homo sapiens	0	0	0.0169206	0	0	0	0	0	0	0	0.0236867	0.0176949	0.0169222	0.0201556	0.0221051				CHOL					DOPG					DOTAP								0.85286	0.712159	0.470608	0.655068	0.784385	0.655878	0.64192	0.712303
29	CD5 antigen-like OS=Homo sapiens GN=CD5L PE=1 SV=1	CD5L_HUMAN	38	5.15	Homo sapiens	0.0186393	0.0198026	0.00740065	0.00634624	0.0232109	0.0162331	0.0114277	0.0314834	0.00887468	0.0152826	0.00616654	0.00972304	0.00740135	0.00748074	0.0211734				CHOL_A	CHOL_B	CHOL_C	CHOL_D	CHOL_E	DOPG_A	DOPG_B	DOPG_C	DOPG_D	DOPG_E	DOTAP_A	DOTAP_B	DOTAP_C	DOTAP_D	DOTAP_E
10	Prothrombin OS=Homo sapiens GN=F2 PE=1 SV=2	THRB_HUMAN	70	5.7	Homo sapiens	0	0	0.0312069	0	0	0	0	0	0	0	0.0140015	0.0286169	0.0312082	0.0168622	0.019539			>9	0.0328945	0.0378366	0.0135659	0.0241458	0.0304049	0.0449992	0.037067	0.039889	0.0258701	0.0188443	0	0.0106481	0.0135662	0	0
27	Apolipoprotein A-I OS=Homo sapiens GN=APOA1 PE=1 SV=1	APOA1_HUMAN	31	5.5	Homo sapiens	0.00668699	0	0.021287	0.00434296	0	0	0.00286385	0	0	0	0.016756	0.021624	0.0212883	0.0157779	0.0147688			08_09	0.144477	0.166436	0.047813	0.218939	0.160366	0.212099	0.181195	0.189257	0.260309	0.241179	0.0992334	0.0693732	0.0472797	0.0902687	0.0969644
22	Fibrinogen gamma chain OS=Homo sapiens GN=FGG PE=1 SV=3	FIBG_HUMAN	52	5.32	Homo sapiens	0	0.00618061	0.0118038	0.00986244	0.00222939	0.00476901	0	0	0.00801404	0.00424963	0.0152484	0.0152301	0.0118048	0.0130128	0.0135014			07_08	0.245802	0.281681	0.0790774	0.329331	0.244119	0.211268	0.220483	0.253729	0.281872	0.232376	0.134556	0.0960634	0.07944	0.119322	0.174159
63	Immunoglobulin J chain OS=Homo sapiens GN=IGJ PE=1 SV=4	IGJ_HUMAN	18	4.87	Homo sapiens	0	0.00769006	0.00690175	0	0.0422653	0	0.00959737	0.0199395	0	0.00992717	0.00999513	0.00401289	0.00690172	0.00296158	0.0134089			06_07	0.224207	0.138337	0.134786	0.0971924	0.269993	0.103379	0.133261	0.143224	0.063185	0.0788915	0.0933353	0.110898	0.134791	0.101555	0.138312
74	Transthyretin OS=Homo sapiens GN=TTR PE=1 SV=1	TTHY_HUMAN	16	5.58	Homo sapiens	0	0	0.0097894	0	0	0	0	0	0	0	0.00317364	0.0124894	0.00979067	0.00834641	0.0116121			05_06	0.230826	0.177001	0.236312	0.102045	0.174189	0.192265	0.177559	0.199741	0.19025	0.129289	0.251333	0.240861	0.236329	0.235212	0.324653				CHOL					DOPG
155	Ig kappa chain V-I region HK102 (Fragment) OS=Homo sapiens GN=IGKV1-5 PE=4 SV=1	KV110_HUMAN	13	8.46	Homo sapiens	0	0	0	0	0	0	0	0	0	0.00668954	0	0	0	0	0.0102435			<5	0.120528	0.143637	0.0737887	0.169147	0.118287	0.217019	0.222678	0.149372	0.0642509	0.162799	0.171431	0.0835995	0.0737888	0.0874426	0.105932				CHOL_A	CHOL_B	CHOL_C	CHOL_D	CHOL_E	DOPG_A	DOPG_B	DOPG_C
51	Complement component C9 OS=Homo sapiens GN=C9 PE=1 SV=2	CO9_HUMAN	63	5.27	Homo sapiens	0	0	0.00333272	0	0	0	0	0	0	0	0.010974	0.00621275	0.0033327	0.00901995	0.0102158			tot	0.998735	0.944928	0.585343	0.9408	0.99736	0.98103	0.972243	0.975213	0.885738	0.863378	0.749889	0.611444	0.585195	0.6338	0.840021			>300	0.00730456	0.00774466	0	0.0144934	0.00250268	0	0	0
8	Keratin, type II cytoskeletal 1 OS=Homo sapiens GN=KRT1 PE=1 SV=6	K2C1_HUMAN	66	8.33	Homo sapiens	0.0204165	0.0475688	0.0102257	0.0474663	0.0363665	0.0694918	0.0514775	0.0550439	0.0192351	0.0568687	0.0301288	0.0151167	0.0100306	0.0154713	0.0101286																					150-300	0.026453	0.0114608	0.020015	0.0150921	0.0211635	0.00824132	0.0124284	0.00957532
64	C4b-binding protein beta chain OS=Homo sapiens GN=C4BPB PE=1 SV=1	C4BPB_HUMAN	28	4.8	Homo sapiens	0	0	0.00795748	0	0	0	0	0	0	0	0.0119441	0.00646677	0.00795728	0.00537807	0.00851608																					100-150	0.00299187	0	0.0221834	0	0	0	0	0
9	Complement C4-A OS=Homo sapiens GN=C4A PE=1 SV=2	CO4A_HUMAN	193	7.08	Homo sapiens	0.00659464	0.00535143	0.00969799	0.00321547	0.00455189	0.00371117	0.00294034	0.0030994	0.00195497	0.000928095	0.0117878	0.00931327	0.0096981	0.00901819	0.00833712																					80-100	0	0	0	0	0	0	0	0
26	Apolipoprotein E OS=Homo sapiens GN=APOE PE=1 SV=1	APOE_HUMAN	36	5.42	Homo sapiens	0	0	0.0165305	0.00192777	0	0	0	0	0	0	0.0150231	0.0212368	0.0165305	0.0157621	0.00824793																					70-80	0	0	0.0312069	0	0	0	0.0107344	0
49	Coagulation factor IX OS=Homo sapiens GN=F9 PE=1 SV=2	FA9_HUMAN	52	5.16	Homo sapiens	0	0	0.00742743	0	0	0	0	0	0	0	0.0028459	0.00872265	0.00742781	0.00667684	0.00821449																					60-70	0.119327	0.163293	0.0646067	0.155076	0.123177	0.228012	0.219396	0.176488
25	Vitamin K-dependent protein S OS=Homo sapiens GN=PROS1 PE=1 SV=1	PROS_HUMAN	75	5.37	Homo sapiens	0	0	0.00988097	0	0	0	0	0	0	0	0.00749636	0.0093768	0.00988021	0.00581077	0.0082118																					50-60	0.0316984	0.0569428	0.115443	0.0754579	0.0199516	0.0987337	0.0903241	0.0532641
33	Serum paraoxonase/arylesterase 1 OS=Homo sapiens GN=PON1 PE=1 SV=3	PON1_HUMAN	40	4.89	Homo sapiens	0	0	0.0153764	0	0	0	0	0	0	0	0.00139664	0.0135802	0.0153768	0.018414	0.00804532																					40-50	0.158003	0.0797114	0.0713682	0.0702007	0.20776	0.0829885	0.0943962	0.140785
46	Immunoglobulin lambda-like polypeptide 5 OS=Homo sapiens GN=IGLL5 PE=2 SV=2	IGLL5_HUMAN	23	9.05	Homo sapiens	0.0275465	0.0295958	0.00944325	0.0241458	0.0304049	0.0376904	0.0169491	0.0240339	0.0258701	0.0188443	0.00312258	0.0074547	0.00944259	0.00617081	0.00795394																					30-40	0.153046	0.156801	0.0893592	0.196549	0.182773	0.119092	0.12358	0.162281
56	Ig alpha-1 chain C region OS=Homo sapiens GN=IGHA1 PE=1 SV=2	IGHA1_HUMAN	38	6.49	Homo sapiens	0.00365917	0.0121003	0.00535735	0.00257496	0.00619678	0.00811655	0.00688242	0	0.00626484	0.00352676	0.00480147	0.00553509	0.00535705	0.00467849	0.00773726																					20-30	0.110677	0.107162	0.0412202	0.117403	0.0469424	0.0964388	0.0771033	0.0828226
30	Apolipoprotein C-III OS=Homo sapiens GN=APOC3 PE=1 SV=1	APOC3_HUMAN	11	5.04	Homo sapiens	0	0	0.0464345	0	0	0	0	0	0	0	0.0217634	0.0218652	0.0464379	0.0217953	0.00757332																					<20	0.389232	0.361812	0.12994	0.296529	0.393089	0.347523	0.34428	0.349996
59	C-reactive protein OS=Homo sapiens GN=CRP PE=1 SV=1	CRP_HUMAN	25	5.32	Homo sapiens	0	0	0.00341468	0	0	0	0	0	0	0	0.027742	0.0141381	0.0034144	0.0177677	0.00754701																					tot	0.998735	0.944928	0.585343	0.9408	0.99736	0.98103	0.972243	0.975213
11	Keratin, type I cytoskeletal 9 OS=Homo sapiens GN=KRT9 PE=1 SV=3	K1C9_HUMAN	62	4.89	Homo sapiens	0.0275579	0.0309865	0.00558888	0.0361175	0.0245412	0.0382105	0.0372096	0.0224232	0.0115192	0.0463698	0.0167793	0.00987511	0.00558949	0.012884	0.00724406
18	Inter-alpha-trypsin inhibitor heavy chain H2 OS=Homo sapiens GN=ITIH2 PE=1 SV=2	ITIH2_HUMAN	106	6.85	Homo sapiens	0	0	0.0106634	0	0	0	0	0	0	0	0.00902378	0.00956359	0.0106639	0.00729088	0.00633391
57	Coagulation factor X OS=Homo sapiens GN=F10 PE=1 SV=2	FA10_HUMAN	55	5.74	Homo sapiens	0	0	0.00535413	0	0	0	0	0	0	0	0.00421427	0.00529578	0.00535443	0.00386951	0.00585114
19	Inter-alpha-trypsin inhibitor heavy chain H1 OS=Homo sapiens GN=ITIH1 PE=1 SV=3	ITIH1_HUMAN	101	6.78	Homo sapiens	0	0	0.0115201	0	0	0	0	0	0	0	0.00354827	0.00903207	0.0115207	0.00747225	0.00554716
37	Kininogen-1 OS=Homo sapiens GN=KNG1 PE=1 SV=2	KNG1_HUMAN	72	6.8	Homo sapiens	0	0	0.00883936	0	0	0	0	0	0	0	0.00427218	0.00794482	0.00883876	0.00480493	0.00554701
47	Protein AMBP OS=Homo sapiens GN=AMBP PE=1 SV=1	AMBP_HUMAN	39	6.15	Homo sapiens	0	0	0.0134295	0	0	0	0	0	0	0	0.00727326	0.0126035	0.0134294	0.00683801	0.00547597
35	Fibrinogen alpha chain OS=Homo sapiens GN=FGA PE=1 SV=2	FIBA_HUMAN	95	5.87	Homo sapiens	0	0	0.00619614	0.00400314	0	0	0	0	0	0	0.00409317	0.00549668	0.00619628	0.00355197	0.00505093
17	Keratin, type I cytoskeletal 10 OS=Homo sapiens GN=KRT10 PE=1 SV=6	K1C10_HUMAN	59	4.88	Homo sapiens	0.00965546	0.0205724	0.00553342	0.0226836	0.0199516	0.0408401	0.0192368	0.0222197	0.00874062	0.0300058	0.0131629	0.00647123	0.00553415	0.00723997	0.00498428
82	Ficolin-3 OS=Homo sapiens GN=FCN3 PE=1 SV=2	FCN3_HUMAN	33	6.66	Homo sapiens	0	0	0.00455424	0	0.00723798	0	0	0	0	0.000871859	0	0.00333934	0.00455417	0.000524685	0.00487595
16	Complement factor H OS=Homo sapiens GN=CFH PE=1 SV=4	CFAH_HUMAN	139	6.59	Homo sapiens	0.00299187	0	0.00791677	0.00122068	0	0	0	0.000588466	0.00428066	0.00419667	0.00291482	0.00736874	0.0079166	0.0049195	0.00480925
41	Serotransferrin OS=Homo sapiens GN=TF PE=1 SV=3	TRFE_HUMAN	77	7.13	Homo sapiens	0	0.00501293	0.00475731	0.00313191	0	0	0.0107344	0.004137	0.00205784	0.00211695	0.00269929	0.00404995	0.00475715	0.00599351	0.00454002
31	Cartilage oligomeric matrix protein OS=Homo sapiens GN=COMP PE=1 SV=2	COMP_HUMAN	83	4.16	Homo sapiens	0	0	0.00707533	0	0	0	0	0	0	0	0.00462367	0.00835715	0.00707631	0.00866403	0.00384289
40	Keratin, type II cytoskeletal 2 epidermal OS=Homo sapiens GN=KRT2 PE=1 SV=2	K22E_HUMAN	65	8.17	Homo sapiens	0	0.0230657	0.00291437	0.0200798	0	0.0365178	0.0247494	0.0215269	0.0021227	0.023813	0.0130304	0.00400982	0.00291491	0.00492926	0.0036676
24	Alpha-2-macroglobulin OS=Homo sapiens GN=A2M PE=1 SV=3	A2MG_HUMAN	163	6.43	Homo sapiens	0.00309508	0.000408756	0.00497569	0	0	0	0	0	0.00024185	0	0.00109486	0.00370005	0.00497578	0.0032755	0.00328451
62	Heparin cofactor 2 OS=Homo sapiens GN=SERPIND1 PE=1 SV=3	HEP2_HUMAN	57	6.89	Homo sapiens	0	0	0.00423993	0	0	0	0	0	0	0	0.00409183	0.00280782	0.00423984	0.00202236	0.00326053
79	Phosphatidylcholine-sterol acyltransferase OS=Homo sapiens GN=LCAT PE=1 SV=1	LCAT_HUMAN	50	6.04	Homo sapiens	0	0	0.00157886	0	0	0	0	0	0	0	0.00309046	0.00402381	0.00157876	0.00372617	0.00321813
36	Clusterin OS=Homo sapiens GN=CLU PE=1 SV=1	CLUS_HUMAN	52	6.21	Homo sapiens	0	0	0.0102198	0	0	0	0	0	0	0	0.00499457	0.0102004	0.0102192	0.0123047	0.00309436
20	Haptoglobin OS=Homo sapiens GN=HP PE=1 SV=1	HPT_HUMAN	45	6.56	Homo sapiens	0.0125438	0.00222091	0.0198615	0.00852434	0.00667368	0	0.00581182	0	0.0070568	0	0.00677896	0.0145103	0.0198638	0.0106559	0.0030873
50	Apolipoprotein A-IV OS=Homo sapiens GN=APOA4 PE=1 SV=3	APOA4_HUMAN	45	5.05	Homo sapiens	0	0	0.00758911	0	0	0	0	0	0	0	0.00973734	0.00896187	0.0075882	0.00810005	0.00295736
83	Complement component C8 alpha chain OS=Homo sapiens GN=C8A PE=1 SV=2	CO8A_HUMAN	65	6.41	Homo sapiens	0	0	0.00120206	0	0	0	0	0	0	0	0	0.00201889	0.00120216	0.00451275	0.0029027
52	Complement C1s subcomponent OS=Homo sapiens GN=C1S PE=1 SV=1	C1S_HUMAN	77	4.59	Homo sapiens	0	0	0.00467859	0	0	0	0	0	0	0	0.00266625	0.00366381	0.00467854	0.00460545	0.00241291
72	Alpha-1-acid glycoprotein 1 OS=Homo sapiens GN=ORM1 PE=1 SV=1	A1AG1_HUMAN	24	4.66	Homo sapiens	0	0	0.00738158	0	0	0	0	0	0	0	0	0.00794482	0.00738091	0.00331466	0.00231642
60	Histidine-rich glycoprotein OS=Homo sapiens GN=HRG PE=1 SV=1	HRG_HUMAN	60	7.52	Homo sapiens	0	0	0.00501432	0	0	0	0	0	0	0.00273839	0	0.0026901	0.00501477	0.00222338	0.00231548
32	Ceruloplasmin OS=Homo sapiens GN=CP PE=1 SV=1	CERU_HUMAN	122	5.5	Homo sapiens	0	0	0.00460098	0	0	0	0	0	0	0	0.00467388	0.00494726	0.00460135	0.00458587	0.00220643
76	Properdin OS=Homo sapiens GN=CFP PE=1 SV=2	PROP_HUMAN	51	7.92	Homo sapiens	0	0.0110659	0.000401682	0.00204116	0	0	0.00338603	0.00308779	0.00272565	0.00525556	0	0	0.000401209	0	0.00217905
54	Keratin, type II cytoskeletal 5 OS=Homo sapiens GN=KRT5 PE=1 SV=3	K2C5_HUMAN	62	7.91	Homo sapiens	0	0.0149722	0.00128566	0.0105495	0	0.0264601	0.027459	0.014818	0.00543979	0.0197245	0.0104198	0.0021531	0.00128559	0.00228692	0.00200705
125	Galectin-3-binding protein OS=Homo sapiens GN=LGALS3BP PE=1 SV=1	LG3BP_HUMAN	65	4.9	Homo sapiens	0	0	0	0	0.0089473	0	0	0	0	0.000442636	0	0.000309463	0	0	0.00170972
55	Alpha-1-antichymotrypsin OS=Homo sapiens GN=SERPINA3 PE=1 SV=2	AACT_HUMAN	48	5.19	Homo sapiens	0	0	0.00736967	0	0	0	0	0	0	0	0	0.00629655	0.00737016	0.00388708	0.00155546
1	Apolipoprotein B-100 OS=Homo sapiens GN=APOB PE=1 SV=2	APOB_HUMAN	516	7.04	Homo sapiens	0.00730456	0.00774466	0.00951681	0.0144934	0.00250268	0.00191925	0.00414551	0.00130698	0.00365237	0.0012374	0.00356542	0.00820388	0.00951687	0.00832001	0.00145702
44	Inter-alpha-trypsin inhibitor heavy chain H3 OS=Homo sapiens GN=ITIH3 PE=1 SV=2	ITIH3_HUMAN	100	5.49	Homo sapiens	0	0	0.00556109	0	0	0	0	0	0	0	0.0033553	0.00499789	0.00556139	0.00399543	0.00133166
65	Vitamin K-dependent protein C OS=Homo sapiens GN=PROC PE=1 SV=1	PROC_HUMAN	52	6.23	Homo sapiens	0	0	0.00377589	0	0	0	0	0	0	0	0.000920761	0.00389521	0.00377593	0.00274252	0.000957208
139	Sodium/potassium-transporting ATPase subunit alpha-2 OS=Homo sapiens GN=ATP1A2 PE=1 SV=1	AT1A2_HUMAN	112	5.33	Homo sapiens	0	0	0	0	0	0	0	0	0	0	0	0	0	0	0.000940793
38	Plasminogen OS=Homo sapiens GN=PLG PE=1 SV=2	PLMN_HUMAN	91	7.25	Homo sapiens	0	0	0.0050479	0.00373867	0	0	0	0	0.000872242	0.00034471	0.0016662	0.00582878	0.00504734	0.00575084	0.000915456
80	Thrombospondin-4 OS=Homo sapiens GN=THBS4 PE=1 SV=2	TSP4_HUMAN	106	4.23	Homo sapiens	0	0	0.00178408	0	0	0	0	0	0	0	0.00218665	0.000465891	0.00178424	0.00142574	0.00052394
45	Complement C5 OS=Homo sapiens GN=C5 PE=1 SV=4	CO5_HUMAN	188	6.49	Homo sapiens	0	0	0.00250632	0	0	0	0	0	0	0	0.000524775	0.00229841	0.00250642	0.00198563	0.000295713
48	Fibronectin OS=Homo sapiens GN=FN1 PE=1 SV=4	FINC_HUMAN	263	5.45	Homo sapiens	0	0	0.00196904	0	0	0	0	0	0	0	0.000182052	0.00152477	0.00196887	0.00105004	0.00021117
23	Ig gamma-2 chain C region OS=Homo sapiens GN=IGHG2 PE=1 SV=2	IGHG2_HUMAN	36	7.66	Homo sapiens	0	0.0505739	0.0137651	0.0801395	0.0569072	0.0109313	0.033856	0.0487126	0.0798726	0.0561437	0.00211576	0.00947621	0.013958	0.0211819	0
58	Ig gamma-3 chain C region OS=Homo sapiens GN=IGHG3 PE=1 SV=2	IGHG3_HUMAN	41	7.95	Homo sapiens	0.0271314	0	0.0156587	0.0238654	0	0.0134704	0	0.0157508	0.0749741	0.033916	0.0126691	0.0171859	0.0158141	0.0186254	0
28	Thrombospondin-1 OS=Homo sapiens GN=THBS1 PE=1 SV=2	TSP1_HUMAN	129	4.51	Homo sapiens	0	0	0.00116093	0	0	0	0	0	0	0	0.00761171	0.0070428	0.00116125	0.0130034	0
73	Serum amyloid A-2 protein OS=Homo sapiens GN=SAA2 PE=1 SV=1	SAA2_HUMAN	14	9.48	Homo sapiens	0	0	0.0135659	0	0	0	0	0	0	0	0.00943091	0.0106481	0.0135662	0.00952878	0
126	Complement C4-B OS=Homo sapiens GN=C4B PE=1 SV=2	CO4B_HUMAN	193	7.28	Homo sapiens	0	0	0.00990377	0	0	0	0	0	0	0	0	0.0063595	0.00990379	0.0092944	0
107	Tropomyosin alpha-4 chain OS=Homo sapiens GN=TPM4 PE=1 SV=3	TPM4_HUMAN	29	4.36	Homo sapiens	0	0	0	0	0	0	0	0	0	0	0.00175097	0.00416252	0	0.00855155	0
61	Complement C1q subcomponent subunit C OS=Homo sapiens GN=C1QC PE=1 SV=3	C1QC_HUMAN	26	8.58	Homo sapiens	0	0.00547951	0.00477814	0.00651275	0.0110171	0	0	0.0152803	0.0129775	0.0114239	0	0.00775568	0.00477811	0.00749331	0
53	Alpha-1-antitrypsin OS=Homo sapiens GN=SERPINA1 PE=1 SV=3	A1AT_HUMAN	47	5.31	Homo sapiens	0	0	0.00834832	0	0	0	0	0	0	0	0	0.00701459	0.00834802	0.007197	0
92	Apolipoprotein A-II OS=Homo sapiens GN=APOA2 PE=1 SV=1	APOA2_HUMAN	11	6.6	Homo sapiens	0	0	0.0106324	0	0	0	0	0	0	0	0	0.0100596	0.0106348	0.00644495	0
66	Apolipoprotein C-II OS=Homo sapiens GN=APOC2 PE=1 SV=1	APOC2_HUMAN	11	4.36	Homo sapiens	0	0	0.0171921	0	0	0	0	0	0	0	0.012003	0.0202013	0.0171936	0.00569602	0
69	Apolipoprotein M OS=Homo sapiens GN=APOM PE=1 SV=2	APOM_HUMAN	21	5.92	Homo sapiens	0	0	0.00939234	0	0	0	0	0	0	0	0	0.0072501	0.0093907	0.00548925	0
141	Serum amyloid A-4 protein OS=Homo sapiens GN=SAA4 PE=1 SV=2	SAA4_HUMAN	15	9.38	Homo sapiens	0	0	0.000850949	0	0	0	0	0	0	0	0	0.00603566	0.000852332	0.00531276	0
100	Secreted phosphoprotein 24 OS=Homo sapiens GN=SPP2 PE=1 SV=1	SPP24_HUMAN	24	8.46	Homo sapiens	0	0	0.00409054	0	0	0	0	0	0	0	0	0.00586808	0.00409059	0.00519225	0
70	Keratin, type I cytoskeletal 16 OS=Homo sapiens GN=KRT16 PE=1 SV=4	K1C16_HUMAN	51	4.69	Homo sapiens	0	0.00522567	0	0	0	0.0312027	0.0350268	0	0	0.0274613	0.0111024	0	0	0.00488682	0
106	Complement component C8 gamma chain OS=Homo sapiens GN=C8G PE=1 SV=3	CO8G_HUMAN	22	8.48	Homo sapiens	0	0	0.00325954	0	0	0	0	0	0	0	0	0.00322143	0.00325995	0.0048339	0
39	Keratin, type I cytoskeletal 14 OS=Homo sapiens GN=KRT14 PE=1 SV=4	K1C14_HUMAN	52	4.81	Homo sapiens	0.00553172	0.0150621	0.0021436	0.0170892	0	0.026691	0.0360605	0.0221824	0.00686212	0.0269248	0.00947984	0.00385146	0.00214319	0.00479285	0
84	Hemoglobin subunit beta OS=Homo sapiens GN=HBB PE=1 SV=2	HBB_HUMAN	16	7.32	Homo sapiens	0	0	0.00365881	0.00841449	0	0.00614886	0.00555278	0.0101575	0	0.00927516	0.00616611	0.00377229	0.00365845	0.00443963	0
127	Complement C1q subcomponent subunit B OS=Homo sapiens GN=C1QB PE=1 SV=3	C1QB_HUMAN	27	8.87	Homo sapiens	0	0	0.000978571	0	0	0	0	0	0	0	0	0.00372585	0.000978744	0.00395395	0
89	Ig alpha-2 chain C region OS=Homo sapiens GN=IGHA2 PE=1 SV=3	IGHA2_HUMAN	37	6.02	Homo sapiens	0	0	0.00584825	0	0	0	0	0	0	0	0	0.00233657	0.00584817	0.00389123	0
91	Actin, cytoplasmic 1 OS=Homo sapiens GN=ACTB PE=1 SV=1	ACTB_HUMAN	42	5.15	Homo sapiens	0	0	0.00030391	0	0	0	0	0	0.00803999	0.000746871	0.00133013	0.00122999	0.000304404	0.00382732	0
67	Beta-2-glycoprotein 1 OS=Homo sapiens GN=APOH PE=1 SV=3	APOH_HUMAN	38	8.03	Homo sapiens	0	0	0	0	0	0	0	0	0.0355189	0.00470234	0	0.00158833	0	0.00374578	0
101	Beta-Ala-His dipeptidase OS=Homo sapiens GN=CNDP1 PE=1 SV=4	CNDP1_HUMAN	57	4.95	Homo sapiens	0	0	0.0011461	0	0	0	0	0	0	0	0	0.000368942	0.00114608	0.00373605	0
88	Serum amyloid P-component OS=Homo sapiens GN=APCS PE=1 SV=2	SAMP_HUMAN	25	6.52	Homo sapiens	0	0	0.00235782	0	0	0	0	0	0.00317496	0	0.00825583	0.0027985	0.00235736	0.00355566	0
98	Dermcidin OS=Homo sapiens GN=DCD PE=1 SV=2	DCD_HUMAN	11	6.52	Homo sapiens	0.0135092	0.00908554	0	0.0128387	0	0.0091287	0	0	0.00363205	0.0108756	0	0	0	0.00322284	0
167	14-3-3 protein zeta/delta OS=Homo sapiens GN=YWHAZ PE=1 SV=1	1433Z_HUMAN	28	4.43	Homo sapiens	0	0	0	0	0	0	0	0	0	0	0	0	0	0.00253194	0
118	Complement C1q subcomponent subunit A OS=Homo sapiens GN=C1QA PE=1 SV=2	C1QA_HUMAN	26	9.45	Homo sapiens	0.00534802	0.00824082	0	0	0	0	0	0.00609812	0	0.00343633	0	0.00158249	0	0.00239911	0
87	Retinol-binding protein 4 OS=Homo sapiens GN=RBP4 PE=1 SV=3	RET4_HUMAN	23	5.85	Homo sapiens	0	0	0.00738621	0	0	0	0	0	0	0	0	0.00302172	0.00738666	0.00234743	0
102	Complement component C8 beta chain OS=Homo sapiens GN=C8B PE=1 SV=3	CO8B_HUMAN	67	8.17	Homo sapiens	0	0	0.000789946	0	0	0	0	0	0	0	0	0.00149464	0.000789714	0.00225982	0
42	Keratin, type II cytoskeletal 6A OS=Homo sapiens GN=KRT6A PE=1 SV=3	K2C6A_HUMAN	60	8.16	Homo sapiens	0	0.0112346	0.00045524	0.00916051	0.0107756	0.0222784	0.0335542	0.0153209	0.0042987	0.0255468	0.0121213	0.00252248	0.000454704	0.00222119	0
115	Ig heavy chain V-III region 23 OS=Homo sapiens GN=IGHV3-23 PE=1 SV=2	HV303_HUMAN	13	8.46	Homo sapiens	0	0	0.00203884	0	0.0129868	0	0	0	0.0213768	0.0206013	0	0	0.00253127	0.00206045	0
75	Complement C1r subcomponent OS=Homo sapiens GN=C1R PE=1 SV=2	C1R_HUMAN	80	6.14	Homo sapiens	0	0	0.0017978	0	0	0	0	0	0	0	0	0.00127448	0.00179796	0.00199558	0
152	Apolipoprotein C-I OS=Homo sapiens GN=APOC1 PE=1 SV=1	APOC1_HUMAN	9	9.17	Homo sapiens	0	0	0	0	0	0	0	0	0	0	0	0	0	0.00198414	0
149	Serglycin OS=Homo sapiens GN=SRGN PE=1 SV=3	SRGN_HUMAN	18	4.57	Homo sapiens	0	0	0	0	0	0	0	0	0	0	0.00822148	0.0039373	0	0.00195399	0
86	Ig kappa chain V-III region HIC OS=Homo sapiens PE=1 SV=2	KV313_HUMAN	14	4.85	Homo sapiens	0	0	0.00519188	0	0.0170609	0	0	0	0	0.00224061	0	0	0.00518812	0.00191328	0
104	Calreticulin OS=Homo sapiens GN=CALR PE=1 SV=1	CALR_HUMAN	48	4.04	Homo sapiens	0	0	0.0013703	0	0	0	0	0	0	0	0.00321923	0.00167661	0.00136988	0.00184916	0
71	Alpha-2-HS-glycoprotein OS=Homo sapiens GN=AHSG PE=1 SV=1	FETUA_HUMAN	39	5.52	Homo sapiens	0	0	0.00671996	0	0	0	0	0	0	0	0.00399019	0.00362271	0.00671984	0.00182139	0
77	Protein Z-dependent protease inhibitor OS=Homo sapiens GN=SERPINA10 PE=1 SV=1	ZPI_HUMAN	51	8.58	Homo sapiens	0	0	0.00271164	0	0	0	0	0	0	0	0	0.00277019	0.00271119	0.00174023	0
97	Mannan-binding lectin serine protease 1 OS=Homo sapiens GN=MASP1 PE=1 SV=3	MASP1_HUMAN	79	5.18	Homo sapiens	0	0	0.00215607	0	0	0	0	0	0	0	0	0	0.00215596	0.00146437	0
117	Complement factor H-related protein 1 OS=Homo sapiens GN=CFHR1 PE=1 SV=2	FHR1_HUMAN	38	7.42	Homo sapiens	0	0	0.00279295	0	0	0	0	0	0.00730148	0	0	0.00209405	0.00279296	0.00142081	0
96	Lumican OS=Homo sapiens GN=LUM PE=1 SV=2	LUM_HUMAN	38	6.6	Homo sapiens	0	0	0.00308955	0	0	0	0	0	0	0	0.00125999	0.00235858	0.00308975	0.00140286	0
133	Ig heavy chain V-III region GA OS=Homo sapiens PE=1 SV=1	HV308_HUMAN	13	10.02	Homo sapiens	0	0	0	0	0	0	0	0	0	0	0	0	0	0.00139513	0
105	Hemopexin OS=Homo sapiens GN=HPX PE=1 SV=2	HEMO_HUMAN	52	7.02	Homo sapiens	0	0	0.00201068	0	0	0	0	0	0	0	0	0.000976083	0.0020109	0.00136351	0
114	Vitamin D-binding protein OS=Homo sapiens GN=GC PE=1 SV=1	VTDB_HUMAN	53	5.21	Homo sapiens	0	0	0.00112745	0	0	0	0	0	0	0	0	0.00226046	0.00112701	0.00133251	0
123	Serum paraoxonase/lactonase 3 OS=Homo sapiens GN=PON3 PE=1 SV=3	PON3_HUMAN	40	5.1	Homo sapiens	0	0	0.00159971	0	0	0	0	0	0	0	0	0.000720441	0.00160105	0.00132942	0
99	Gelsolin OS=Homo sapiens GN=GSN PE=1 SV=1	GELS_HUMAN	86	6.19	Homo sapiens	0	0	0.00114203	0	0	0	0	0	0	0	0	0.00151534	0.0011419	0.00124451	0
160	Amyloid beta A4 protein OS=Homo sapiens GN=APP PE=1 SV=3	A4_HUMAN	87	4.45	Homo sapiens	0	0	0	0	0	0	0	0	0	0	0	0.000241721	0	0.0012286	0
43	Apolipoprotein(a) OS=Homo sapiens GN=LPA PE=1 SV=1	APOA_HUMAN	501	5.77	Homo sapiens	0.00126546	0.00027629	0.000743902	0.00233644	0	0.000419256	0	0	0.000870667	0.000178332	0	0.000720117	0.000757453	0.00122393	0
68	Vitamin K-dependent protein Z OS=Homo sapiens GN=PROZ PE=1 SV=2	PROZ_HUMAN	45	5.87	Homo sapiens	0	0	0.00624944	0	0	0	0	0	0	0	0	0.00244885	0.00625002	0.00118171	0
94	Alpha-1B-glycoprotein OS=Homo sapiens GN=A1BG PE=1 SV=4	A1BG_HUMAN	54	5.71	Homo sapiens	0	0	0.0025535	0	0	0	0	0	0	0	0	0.00185446	0.00255319	0.00115513	0
146	Prenylcysteine oxidase 1 OS=Homo sapiens GN=PCYOX1 PE=1 SV=3	PCYOX_HUMAN	57	6.1	Homo sapiens	0	0	0	0.00171664	0	0	0	0	0	0	0	0	0	0.00109202	0
122	Integrin beta-3 OS=Homo sapiens GN=ITGB3 PE=1 SV=2	ITB3_HUMAN	87	4.85	Homo sapiens	0	0	0	0.00432335	0	0	0	0	0.00113891	0	0	0	0	0.00080543	0
90	Inter-alpha-trypsin inhibitor heavy chain H4 OS=Homo sapiens GN=ITIH4 PE=1 SV=4	ITIH4_HUMAN	103	6.97	Homo sapiens	0	0	0.00133873	0	0	0	0	0	0	0	0	0.00117197	0.00133856	0.000776338	0
174	Tubulin alpha-4A chain OS=Homo sapiens GN=TUBA4A PE=1 SV=1	TBA4A_HUMAN	50	4.69	Homo sapiens	0	0	0	0	0	0	0	0	0	0	0	0.000402302	0	0.000719878	0
175	Extracellular superoxide dismutase [Cu-Zn] OS=Homo sapiens GN=SOD3 PE=1 SV=2	SODE_HUMAN	26	6.59	Homo sapiens	0	0	0	0	0	0	0	0	0	0	0.00195301	0	0	0.000686817	0
34	Hornerin OS=Homo sapiens GN=HRNR PE=1 SV=2	HORN_HUMAN	282	10.24	Homo sapiens	0	0.00608551	0	0.00376765	0.000411093	0.00400606	0.0051008	0.000984578	0.000420635	0.00474393	0.00034985	0.000389152	0	0.000630959	0
109	Phosphatidylinositol-glycan-specific phospholipase D OS=Homo sapiens GN=GPLD1 PE=1 SV=3	PHLD_HUMAN	92	6.33	Homo sapiens	0	0	0.00113602	0	0	0	0	0	0	0	0	0.00119284	0.00113628	0.000479353	0
128	Mannan-binding lectin serine protease 2 OS=Homo sapiens GN=MASP2 PE=1 SV=4	MASP2_HUMAN	76	5.37	Homo sapiens	0	0	0.000943001	0	0	0	0	0	0	0	0	0.000529493	0.000943283	0.000473604	0
137	Integrin alpha-IIb OS=Homo sapiens GN=ITGA2B PE=1 SV=3	ITA2B_HUMAN	113	5.03	Homo sapiens	0	0	0	0	0	0	0	0	0	0	0	0	0	0.000469284	0
78	Coagulation factor V OS=Homo sapiens GN=F5 PE=1 SV=4	FA5_HUMAN	252	5.95	Homo sapiens	0	0	0.000465387	0	0	0	0	0	0	0	0.00061753	0	0.000465565	0.000459623	0
143	Selenoprotein P OS=Homo sapiens GN=SEPP1 PE=1 SV=3	SEPP1_HUMAN	43	7.92	Homo sapiens	0	0	0.00106166	0	0	0	0	0	0	0	0	0	0.00106191	0.000415285	0
103	Pigment epithelium-derived factor OS=Homo sapiens GN=SERPINF1 PE=1 SV=4	PEDF_HUMAN	46	6.33	Homo sapiens	0	0	0.00228355	0	0	0	0	0	0	0	0	0.00134168	0.00228313	0.000376405	0
195	Tubulin beta-1 chain OS=Homo sapiens GN=TUBB1 PE=1 SV=1	TBB1_HUMAN	50	4.82	Homo sapiens	0	0	0	0	0	0	0	0	0	0	0	0	0	0.000362733	0
108	Alpha-2-antiplasmin OS=Homo sapiens GN=SERPINF2 PE=1 SV=3	A2AP_HUMAN	55	6.24	Homo sapiens	0	0	0.0021412	0	0	0	0	0	0	0	0	0.000548594	0.00214145	0.000314811	0
95	Filamin-A OS=Homo sapiens GN=FLNA PE=1 SV=4	FLNA_HUMAN	281	5.95	Homo sapiens	0	0.0012623	0	0.00147686	0	0	0	0	0.000635402	0.000566995	0	7.48388e-05	0	0.000282137	0
176	Fibulin-1 OS=Homo sapiens GN=FBLN1 PE=1 SV=4	FBLN1_HUMAN	77	4.86	Homo sapiens	0	0	0	0	0	0	0	0	0	0	0	0	0	0.000224865	0
177	Complement factor B OS=Homo sapiens GN=CFB PE=1 SV=2	CFAB_HUMAN	86	7.07	Homo sapiens	0	0	0	0	0	0	0	0	0	0	0	0	0	0.000201333	0
162	Aggrecan core protein OS=Homo sapiens GN=ACAN PE=1 SV=2	PGCA_HUMAN	250	3.82	Homo sapiens	0	0	0.00010602	0	0	0	0	0	0	0	0	0	0.000105939	7.1429e-05	0
121	Ig gamma-4 chain C region OS=Homo sapiens GN=IGHG4 PE=1 SV=1	IGHG4_HUMAN	36	7.41	Homo sapiens	0	0	0.00904965	0	0	0	0	0	0	0.0109517	0	0.00453611	0.0094188	0	0
135	Haptoglobin-related protein OS=Homo sapiens GN=HPR PE=2 SV=2	HPTR_HUMAN	39	7.11	Homo sapiens	0	0	0.00722283	0	0	0	0	0	0	0	0	0	0.00722783	0	0
129	Alpha-1-acid glycoprotein 2 OS=Homo sapiens GN=ORM2 PE=1 SV=2	A1AG2_HUMAN	24	4.76	Homo sapiens	0	0	0.00599442	0	0	0	0	0	0	0	0	0.00120073	0.00599441	0	0
148	Ig lambda chain V-III region LOI OS=Homo sapiens PE=1 SV=1	LV302_HUMAN	12	4.72	Homo sapiens	0	0	0.0027778	0	0	0	0	0	0.0066342	0	0	0	0.00331059	0	0
110	Antithrombin-III OS=Homo sapiens GN=SERPINC1 PE=1 SV=1	ANT3_HUMAN	53	6.68	Homo sapiens	0	0	0.00248047	0	0	0	0	0	0	0	0	0.000742016	0.00248019	0	0
112	Angiotensinogen OS=Homo sapiens GN=AGT PE=1 SV=1	ANGT_HUMAN	53	6.27	Homo sapiens	0	0	0.00235163	0	0	0	0	0	0	0	0	0.00169968	0.0023515	0	0
134	Apolipoprotein F OS=Homo sapiens GN=APOF PE=1 SV=2	APOF_HUMAN	35	5.36	Homo sapiens	0	0	0.00186531	0	0	0	0	0	0	0	0	0.00112362	0.00186563	0	0
154	Glutathione peroxidase 3 OS=Homo sapiens GN=GPX3 PE=1 SV=2	GPX3_HUMAN	26	8.29	Homo sapiens	0	0	0.00151035	0	0	0	0	0	0	0	0	0	0.00151037	0	0
81	Complement component C6 OS=Homo sapiens GN=C6 PE=1 SV=3	CO6_HUMAN	105	6.74	Homo sapiens	0	0	0.00149597	0	0	0	0	0	0	0	0	0.00173749	0.00149599	0	0
130	Complement factor I OS=Homo sapiens GN=CFI PE=1 SV=2	CFAI_HUMAN	66	7.53	Homo sapiens	0	0	0.00139627	0	0	0	0	0	0	0	0	0.000595861	0.00139623	0	0
144	Collectin-11 OS=Homo sapiens GN=COLEC11 PE=1 SV=1	COL11_HUMAN	29	5.06	Homo sapiens	0	0	0.00135411	0	0	0	0	0	0	0	0	0.00312189	0.00135413	0	0
124	Ig lambda chain V-I region HA OS=Homo sapiens PE=1 SV=1	LV102_HUMAN	12	5.69	Homo sapiens	0	0	0.00220875	0	0	0	0	0	0.00332938	0	0	0	0.00113676	0	0
168	Apolipoprotein L1 OS=Homo sapiens GN=APOL1 PE=1 SV=5	APOL1_HUMAN	44	5.55	Homo sapiens	0	0	0.000728089	0	0	0	0	0	0	0	0	0	0.000728418	0	0
165	Angiopoietin-related protein 6 OS=Homo sapiens GN=ANGPTL6 PE=1 SV=1	ANGL6_HUMAN	52	8.64	Homo sapiens	0	0	0.000615272	0	0	0	0	0	0	0	0	0	0.00061579	0	0
158	Coagulation factor VII OS=Homo sapiens GN=F7 PE=1 SV=1	FA7_HUMAN	52	7.23	Homo sapiens	0	0	0.000508104	0	0	0	0	0	0	0	0	0	0.000508194	0	0
178	Afamin OS=Homo sapiens GN=AFM PE=1 SV=1	AFAM_HUMAN	69	5.7	Homo sapiens	0	0	0.000464289	0	0	0	0	0	0	0	0	0	0.000464499	0	0
163	Heat shock 70 kDa protein 1-like OS=Homo sapiens GN=HSPA1L PE=1 SV=2	HS71L_HUMAN	70	5.82	Homo sapiens	0	0	0.000378643	0	0	0	0	0	0	0	0.000725403	0	0.000378353	0	0
187	Dickkopf-related protein 3 OS=Homo sapiens GN=DKK3 PE=1 SV=2	DKK3_HUMAN	38	4.3	Homo sapiens	0	0	0.000335901	0	0	0	0	0	0	0	0	0	0.000336447	0	0
170	Complement component C7 OS=Homo sapiens GN=C7 PE=1 SV=2	CO7_HUMAN	94	6.44	Homo sapiens	0	0	0.000281079	0	0	0	0	0	0	0	0	0	0.000281129	0	0
161	Elongation factor 1-alpha 1 OS=Homo sapiens GN=EEF1A1 PE=1 SV=1	EF1A1_HUMAN	50	9.5	Homo sapiens	0	0	0.000255285	0	0	0	0	0	0	0	0.00213287	0	0.0002557	0	0
169	Carboxypeptidase N catalytic chain OS=Homo sapiens GN=CPN1 PE=1 SV=1	CBPN_HUMAN	52	7.36	Homo sapiens	0	0	0.000245466	0	0	0	0	0	0	0	0	0	0.000245865	0	0
179	Phospholipid transfer protein OS=Homo sapiens GN=PLTP PE=1 SV=1	PLTP_HUMAN	55	7.01	Homo sapiens	0	0	0.000233596	0	0	0	0	0	0	0	0	0	0.00023352	0	0
131	Endoplasmin OS=Homo sapiens GN=HSP90B1 PE=1 SV=1	ENPL_HUMAN	92	4.48	Homo sapiens	0	0	0.000208113	0	0	0	0	0	0	0	0	0	0.000208451	0	0
173	Plasma kallikrein OS=Homo sapiens GN=KLKB1 PE=1 SV=1	KLKB1_HUMAN	71	8.26	Homo sapiens	0	0	0.000180955	0	0	0	0	0	0	0	0	0	0.000180896	0	0
120	Ig heavy chain V-I region V35 OS=Homo sapiens PE=1 SV=1	HV103_HUMAN	13	9.87	Homo sapiens	0	0	0	0	0	0	0.0201178	0	0	0	0	0.00154732	0	0	0
181	Collectin-10 OS=Homo sapiens GN=COLEC10 PE=2 SV=2	COL10_HUMAN	31	7.39	Homo sapiens	0	0	0	0	0	0	0	0	0	0	0	0.000678378	0	0	0
186	Glucosidase 2 subunit beta OS=Homo sapiens GN=PRKCSH PE=1 SV=2	GLU2B_HUMAN	59	4.05	Homo sapiens	0	0	0	0	0	0	0	0	0	0	0	0.000356436	0	0	0
85	Keratin, type I cytoskeletal 17 OS=Homo sapiens GN=KRT17 PE=1 SV=2	K1C17_HUMAN	48	4.67	Homo sapiens	0	0.00474001	0	0	0	0.0213264	0.0253927	0.0190986	0	0.0198348	0.0043831	0	0	0	0
116	Ficolin-2 OS=Homo sapiens GN=FCN2 PE=1 SV=2	FCN2_HUMAN	34	6.77	Homo sapiens	0	0.0063018	0	0	0	0	0.00507904	0	0.00409976	0.00262778	0.0016431	0	0	0	0
182	Small proline-rich protein 2A OS=Homo sapiens GN=SPRR2A PE=1 SV=1	SPR2A_HUMAN	8	8.49	Homo sapiens	0	0	0	0	0	0	0	0	0	0.0147916	0	0	0	0	0
151	Keratin, type I cytoskeletal 13 OS=Homo sapiens GN=KRT13 PE=1 SV=4	K1C13_HUMAN	50	4.61	Homo sapiens	0	0	0	0	0	0	0	0	0	0.0101459	0	0	0	0	0
113	Calmodulin-like protein 5 OS=Homo sapiens GN=CALML5 PE=1 SV=2	CALL5_HUMAN	16	4.05	Homo sapiens	0	0	0	0	0	0	0	0	0.0074395	0.00935632	0	0	0	0	0
192	Extracellular glycoprotein lacritin OS=Homo sapiens GN=LACRT PE=1 SV=1	LACRT_HUMAN	14	5.2	Homo sapiens	0	0	0	0	0	0	0	0	0	0.00638175	0	0	0	0	0
188	Keratin, type II cytoskeletal 4 OS=Homo sapiens GN=KRT4 PE=1 SV=4	K2C4_HUMAN	57	6.55	Homo sapiens	0	0	0	0	0	0	0	0	0	0.00599463	0	0	0	0	0
93	Hemoglobin subunit alpha OS=Homo sapiens GN=HBA1 PE=1 SV=2	HBA_HUMAN	15	9.09	Homo sapiens	0	0	0	0.00652322	0	0.00730877	0	0.0158551	0	0.00287713	0	0	0	0	0
147	Ig heavy chain V-III region GAL OS=Homo sapiens PE=1 SV=1	HV320_HUMAN	13	8.7	Homo sapiens	0	0	0	0	0	0	0	0	0.0121887	0.00241297	0	0	0	0	0
138	Lipopolysaccharide-binding protein OS=Homo sapiens GN=LBP PE=1 SV=3	LBP_HUMAN	53	6.68	Homo sapiens	0	0	0	0	0	0	0	0	0.00449177	0.0022286	0	0	0	0	0
184	Keratin, type II cytoskeletal 78 OS=Homo sapiens GN=KRT78 PE=2 SV=2	K2C78_HUMAN	57	5.83	Homo sapiens	0	0	0	0	0	0	0	0	0	0.00211017	0	0	0	0	0
191	Prolactin-inducible protein OS=Homo sapiens GN=PIP PE=1 SV=1	PIP_HUMAN	17	8.18	Homo sapiens	0	0	0	0	0	0	0	0	0	0.00171792	0	0	0	0	0
140	Lysozyme C OS=Homo sapiens GN=LYZ PE=1 SV=1	LYSC_HUMAN	17	9.35	Homo sapiens	0	0	0	0	0	0	0	0	0.00465173	0.00169243	0	0	0	0	0
183	Glyceraldehyde-3-phosphate dehydrogenase OS=Homo sapiens GN=GAPDH PE=1 SV=3	G3P_HUMAN	36	8.73	Homo sapiens	0	0	0	0	0	0	0	0	0	0.00161044	0	0	0	0	0
145	Lipocalin-1 OS=Homo sapiens GN=LCN1 PE=1 SV=1	LCN1_HUMAN	19	5.3	Homo sapiens	0	0	0	0	0	0	0	0	0	0.00153709	0	0	0	0	0
193	Suprabasin OS=Homo sapiens GN=SBSN PE=1 SV=2	SBSN_HUMAN	61	7.01	Homo sapiens	0	0	0	0	0	0	0	0	0	0.00146466	0	0	0	0	0
159	Junction plakoglobin OS=Homo sapiens GN=JUP PE=1 SV=3	PLAK_HUMAN	82	6.05	Homo sapiens	0	0	0	0	0	0	0	0	0	0.00145627	0	0	0	0	0
111	Desmoplakin OS=Homo sapiens GN=DSP PE=1 SV=3	DESP_HUMAN	332	6.78	Homo sapiens	0	0	0	0	0	0	0	0	0	0.00112303	0	0	0	0	0
180	Desmoglein-1 OS=Homo sapiens GN=DSG1 PE=1 SV=2	DSG1_HUMAN	114	4.66	Homo sapiens	0	0	0	0	0	0	0	0	0	0.0010475	0	0	0	0	0
166	Desmocollin-1 OS=Homo sapiens GN=DSC1 PE=1 SV=2	DSC1_HUMAN	100	5.08	Homo sapiens	0	0	0	0	0	0	0	0	0	0.000893445	0	0	0	0	0
150	Filaggrin-2 OS=Homo sapiens GN=FLG2 PE=1 SV=1	FILA2_HUMAN	248	8.35	Homo sapiens	0	0	0	0	0	0	0	0.000964814	0	0.000662514	0	0	0	0	0
172	Filaggrin OS=Homo sapiens GN=FLG PE=1 SV=3	FILA_HUMAN	435	9.6	Homo sapiens	0	0	0	0	0	0	0	0	0	0.000166349	0	0	0	0	0
119	Platelet factor 4 OS=Homo sapiens GN=PF4 PE=1 SV=2	PLF4_HUMAN	11	8.78	Homo sapiens	0	0.00652671	0	0	0	0	0	0	0.0234582	0	0	0	0	0	0
164	Ig kappa chain V-IV region (Fragment) OS=Homo sapiens GN=IGKV4-1 PE=4 SV=1	KV401_HUMAN	13	4.85	Homo sapiens	0	0	0	0	0	0	0	0	0.0091563	0	0	0	0	0	0
171	Neutrophil defensin 1 OS=Homo sapiens GN=DEFA1 PE=1 SV=1	DEF1_HUMAN	10	7.04	Homo sapiens	0	0	0	0.0134632	0	0	0	0	0.00790794	0	0	0	0	0	0
194	Platelet basic protein OS=Homo sapiens GN=PPBP PE=1 SV=3	CXCL7_HUMAN	14	9.07	Homo sapiens	0	0	0	0	0	0	0	0	0.00564853	0	0	0	0	0	0
156	Ig heavy chain V-II region ARH-77 OS=Homo sapiens PE=4 SV=1	HV209_HUMAN	16	8.45	Homo sapiens	0	0	0	0	0	0	0	0	0.00499406	0	0	0	0	0	0
157	Erythrocyte band 7 integral membrane protein OS=Homo sapiens GN=STOM PE=1 SV=3	STOM_HUMAN	32	8.07	Homo sapiens	0	0	0	0	0	0	0	0	0.00371975	0	0	0	0	0	0
189	Trypsin-1 OS=Homo sapiens GN=PRSS1 PE=1 SV=1	TRY1_HUMAN	27	6.49	Homo sapiens	0	0	0	0	0	0	0	0	0.00293978	0	0	0	0	0	0
185	Alpha-amylase 1 OS=Homo sapiens GN=AMY1A PE=1 SV=2	AMY1_HUMAN	58	6.92	Homo sapiens	0	0	0	0	0	0	0	0	0.000683757	0	0	0	0	0	0
136	Nephronectin OS=Homo sapiens GN=NPNT PE=2 SV=3	NPNT_HUMAN	62	8.38	Homo sapiens	0	0	0	0	0	0	0	0	0.000635831	0	0	0	0	0	0
190	Integrin beta-1 OS=Homo sapiens GN=ITGB1 PE=1 SV=2	ITB1_HUMAN	88	5.04	Homo sapiens	0	0	0	0	0	0	0	0	0.000447972	0	0	0	0	0	0
153	Pre-mRNA-splicing factor CWC25 homolog OS=Homo sapiens GN=CWC25 PE=1 SV=1	CWC25_HUMAN	50	10.9	Homo sapiens	0	0	0	0	0	0	0.00177559	0.00314954	0	0	0	0	0	0	0
132	Ezrin OS=Homo sapiens GN=EZR PE=1 SV=4	EZRI_HUMAN	69	6.17	Homo sapiens	0	0	0	0	0	0.0014553	0	0	0	0	0	0	0	0	0
[truncated: 7 more columns]

## Sheet: Category-Pancreas
							CHOL					DOPG					DOTAP							Acute phase																		Coagulation
							4.70159	9.36073	50.9777	9.70261	5.69907	6.49879	7.65273	8.36491	16.8027	22.4171	12.9954	33.1816	50.9743	37.5314	12.4631			Accession Number	CHOL_A	CHOL_B	CHOL_C	CHOL_D	CHOL_E	DOPG_A	DOPG_B	DOPG_C	DOPG_D	DOPG_E	DOTAP_A	DOTAP_B	DOTAP_C	DOTAP_D	DOTAP_E			Accession Number	CHOL_A	CHOL_B	CHOL_C	CHOL_D	CHOL_E	DOPG_A	DOPG_B
#	Identified Proteins (195)	Accession Number	Category	Molecular Weight	pI	Taxonomy	CHOL_A	CHOL_B	CHOL_C	CHOL_D	CHOL_E	DOPG_A	DOPG_B	DOPG_C	DOPG_D	DOPG_E	DOTAP_A	DOTAP_B	DOTAP_C	DOTAP_D	DOTAP_E			A1AG1_HUMAN	0	0	0.00738158	0	0	0	0	0	0	0	0	0.00794482	0.00738091	0.00331466	0.00231642			A2AP_HUMAN	0	0	0.0021412	0	0	0	0
72	Alpha-1-acid glycoprotein 1 OS=Homo sapiens GN=ORM1 PE=1 SV=1	A1AG1_HUMAN	Acute phase	24	4.66	Homo sapiens	0	0	0.00738158	0	0	0	0	0	0	0	0	0.00794482	0.00738091	0.00331466	0.00231642			A1AG2_HUMAN	0	0	0.00599442	0	0	0	0	0	0	0	0	0.00120073	0.00599441	0	0			ANT3_HUMAN	0	0	0.00248047	0	0	0	0
129	Alpha-1-acid glycoprotein 2 OS=Homo sapiens GN=ORM2 PE=1 SV=2	A1AG2_HUMAN	Acute phase	24	4.76	Homo sapiens	0	0	0.00599442	0	0	0	0	0	0	0	0	0.00120073	0.00599441	0	0			AACT_HUMAN	0	0	0.00736967	0	0	0	0	0	0	0	0	0.00629655	0.00737016	0.00388708	0.00155546			FA9_HUMAN	0	0	0.00742743	0	0	0	0
55	Alpha-1-antichymotrypsin OS=Homo sapiens GN=SERPINA3 PE=1 SV=2	AACT_HUMAN	Acute phase	48	5.19	Homo sapiens	0	0	0.00736967	0	0	0	0	0	0	0	0	0.00629655	0.00737016	0.00388708	0.00155546			A1AT_HUMAN	0	0	0.00834832	0	0	0	0	0	0	0	0	0.00701459	0.00834802	0.007197	0			FA5_HUMAN	0	0	0.000465387	0	0	0	0
53	Alpha-1-antitrypsin OS=Homo sapiens GN=SERPINA1 PE=1 SV=3	A1AT_HUMAN	Acute phase	47	5.31	Homo sapiens	0	0	0.00834832	0	0	0	0	0	0	0	0	0.00701459	0.00834802	0.007197	0			A1BG_HUMAN	0	0	0.0025535	0	0	0	0	0	0	0	0	0.00185446	0.00255319	0.00115513	0			FA7_HUMAN	0	0	0.000508104	0	0	0	0
94	Alpha-1B-glycoprotein OS=Homo sapiens GN=A1BG PE=1 SV=4	A1BG_HUMAN	Acute phase	54	5.71	Homo sapiens	0	0	0.0025535	0	0	0	0	0	0	0	0	0.00185446	0.00255319	0.00115513	0			FETUA_HUMAN	0	0	0.00671996	0	0	0	0	0	0	0	0.00399019	0.00362271	0.00671984	0.00182139	0			FA10_HUMAN	0	0	0.00535413	0	0	0	0
71	Alpha-2-HS-glycoprotein OS=Homo sapiens GN=AHSG PE=1 SV=1	FETUA_HUMAN	Acute phase	39	5.52	Homo sapiens	0	0	0.00671996	0	0	0	0	0	0	0	0.00399019	0.00362271	0.00671984	0.00182139	0			A2MG_HUMAN	0.00309508	0.000408756	0.00497569	0	0	0	0	0	0.00024185	0	0.00109486	0.00370005	0.00497578	0.0032755	0.00328451			FIBA_HUMAN	0	0	0.00619614	0.00400314	0	0	0
24	Alpha-2-macroglobulin OS=Homo sapiens GN=A2M PE=1 SV=3	A2MG_HUMAN	Acute phase	163	6.43	Homo sapiens	0.00309508	0.000408756	0.00497569	0	0	0	0	0	0.00024185	0	0.00109486	0.00370005	0.00497578	0.0032755	0.00328451			CRP_HUMAN	0	0	0.00341468	0	0	0	0	0	0	0	0.027742	0.0141381	0.0034144	0.0177677	0.00754701			FIBB_HUMAN	0	0.0102424	0.023466	0.0258227	0	0.00268971	0
59	C-reactive protein OS=Homo sapiens GN=CRP PE=1 SV=1	CRP_HUMAN	Acute phase	25	5.32	Homo sapiens	0	0	0.00341468	0	0	0	0	0	0	0	0.027742	0.0141381	0.0034144	0.0177677	0.00754701			HPT_HUMAN	0.0125438	0.00222091	0.0198615	0.00852434	0.00667368	0	0.00581182	0	0.0070568	0	0.00677896	0.0145103	0.0198638	0.0106559	0.0030873			FIBG_HUMAN	0	0.00618061	0.0118038	0.00986244	0.00222939	0.00476901	0
20	Haptoglobin OS=Homo sapiens GN=HP PE=1 SV=1	HPT_HUMAN	Acute phase	45	6.56	Homo sapiens	0.0125438	0.00222091	0.0198615	0.00852434	0.00667368	0	0.00581182	0	0.0070568	0	0.00677896	0.0145103	0.0198638	0.0106559	0.0030873			HPTR_HUMAN	0	0	0.00722283	0	0	0	0	0	0	0	0	0	0.00722783	0	0			ITA2B_HUMAN	0	0	0	0	0	0	0
135	Haptoglobin-related protein OS=Homo sapiens GN=HPR PE=2 SV=2	HPTR_HUMAN	Acute phase	39	7.11	Homo sapiens	0	0	0.00722283	0	0	0	0	0	0	0	0	0	0.00722783	0	0			LBP_HUMAN	0	0	0	0	0	0	0	0	0.00449177	0.0022286	0	0	0	0	0			ITB1_HUMAN	0	0	0	0	0	0	0
138	Lipopolysaccharide-binding protein OS=Homo sapiens GN=LBP PE=1 SV=3	LBP_HUMAN	Acute phase	53	6.68	Homo sapiens	0	0	0	0	0	0	0	0	0.00449177	0.0022286	0	0	0	0	0			CXCL7_HUMAN	0	0	0	0	0	0	0	0	0.00564853	0	0	0	0	0	0			ITB3_HUMAN	0	0	0	0.00432335	0	0	0
194	Platelet basic protein OS=Homo sapiens GN=PPBP PE=1 SV=3	CXCL7_HUMAN	Acute phase	14	9.07	Homo sapiens	0	0	0	0	0	0	0	0	0.00564853	0	0	0	0	0	0			PLF4_HUMAN	0	0.00652671	0	0	0	0	0	0	0.0234582	0	0	0	0	0	0			KNG1_HUMAN	0	0	0.00883936	0	0	0	0
119	Platelet factor 4 OS=Homo sapiens GN=PF4 PE=1 SV=2	PLF4_HUMAN	Acute phase	11	8.78	Homo sapiens	0	0.00652671	0	0	0	0	0	0	0.0234582	0	0	0	0	0	0			SAA2_HUMAN	0	0	0.0135659	0	0	0	0	0	0	0	0.00943091	0.0106481	0.0135662	0.00952878	0			PLMN_HUMAN	0	0	0.0050479	0.00373867	0	0	0
73	Serum amyloid A-2 protein OS=Homo sapiens GN=SAA2 PE=1 SV=1	SAA2_HUMAN	Acute phase	14	9.48	Homo sapiens	0	0	0.0135659	0	0	0	0	0	0	0	0.00943091	0.0106481	0.0135662	0.00952878	0			SAA4_HUMAN	0	0	0.000850949	0	0	0	0	0	0	0	0	0.00603566	0.000852332	0.00531276	0			THRB_HUMAN	0	0	0.0312069	0	0	0	0
141	Serum amyloid A-4 protein OS=Homo sapiens GN=SAA4 PE=1 SV=2	SAA4_HUMAN	Acute phase	15	9.38	Homo sapiens	0	0	0.000850949	0	0	0	0	0	0	0	0	0.00603566	0.000852332	0.00531276	0			SAMP_HUMAN	0	0	0.00235782	0	0	0	0	0	0.00317496	0	0.00825583	0.0027985	0.00235736	0.00355566	0			TSP1_HUMAN	0	0	0.00116093	0	0	0	0
88	Serum amyloid P-component OS=Homo sapiens GN=APCS PE=1 SV=2	SAMP_HUMAN	Acute phase	25	6.52	Homo sapiens	0	0	0.00235782	0	0	0	0	0	0.00317496	0	0.00825583	0.0027985	0.00235736	0.00355566	0																					TSP4_HUMAN	0	0	0.00178408	0	0	0	0
108	Alpha-2-antiplasmin OS=Homo sapiens GN=SERPINF2 PE=1 SV=3	A2AP_HUMAN	Coagulation	55	6.24	Homo sapiens	0	0	0.0021412	0	0	0	0	0	0	0	0	0.000548594	0.00214145	0.000314811	0																					PROC_HUMAN	0	0	0.00377589	0	0	0	0
110	Antithrombin-III OS=Homo sapiens GN=SERPINC1 PE=1 SV=1	ANT3_HUMAN	Coagulation	53	6.68	Homo sapiens	0	0	0.00248047	0	0	0	0	0	0	0	0	0.000742016	0.00248019	0	0																					PROS_HUMAN	0	0	0.00988097	0	0	0	0
49	Coagulation factor IX OS=Homo sapiens GN=F9 PE=1 SV=2	FA9_HUMAN	Coagulation	52	5.16	Homo sapiens	0	0	0.00742743	0	0	0	0	0	0	0	0.0028459	0.00872265	0.00742781	0.00667684	0.00821449																					PROZ_HUMAN	0	0	0.00624944	0	0	0	0
78	Coagulation factor V OS=Homo sapiens GN=F5 PE=1 SV=4	FA5_HUMAN	Coagulation	252	5.95	Homo sapiens	0	0	0.000465387	0	0	0	0	0	0	0	0.00061753	0	0.000465565	0.000459623	0
158	Coagulation factor VII OS=Homo sapiens GN=F7 PE=1 SV=1	FA7_HUMAN	Coagulation	52	7.23	Homo sapiens	0	0	0.000508104	0	0	0	0	0	0	0	0	0	0.000508194	0	0
57	Coagulation factor X OS=Homo sapiens GN=F10 PE=1 SV=2	FA10_HUMAN	Coagulation	55	5.74	Homo sapiens	0	0	0.00535413	0	0	0	0	0	0	0	0.00421427	0.00529578	0.00535443	0.00386951	0.00585114
35	Fibrinogen alpha chain OS=Homo sapiens GN=FGA PE=1 SV=2	FIBA_HUMAN	Coagulation	95	5.87	Homo sapiens	0	0	0.00619614	0.00400314	0	0	0	0	0	0	0.00409317	0.00549668	0.00619628	0.00355197	0.00505093
13	Fibrinogen beta chain OS=Homo sapiens GN=FGB PE=1 SV=2	FIBB_HUMAN	Coagulation	56	8.38	Homo sapiens	0	0.0102424	0.023466	0.0258227	0	0.00268971	0	0.00137061	0.00602262	0.00185233	0.0247887	0.0230995	0.0234677	0.0261906	0.0239804
22	Fibrinogen gamma chain OS=Homo sapiens GN=FGG PE=1 SV=3	FIBG_HUMAN	Coagulation	52	5.32	Homo sapiens	0	0.00618061	0.0118038	0.00986244	0.00222939	0.00476901	0	0	0.00801404	0.00424963	0.0152484	0.0152301	0.0118048	0.0130128	0.0135014
137	Integrin alpha-IIb OS=Homo sapiens GN=ITGA2B PE=1 SV=3	ITA2B_HUMAN	Coagulation	113	5.03	Homo sapiens	0	0	0	0	0	0	0	0	0	0	0	0	0	0.000469284	0
190	Integrin beta-1 OS=Homo sapiens GN=ITGB1 PE=1 SV=2	ITB1_HUMAN	Coagulation	88	5.04	Homo sapiens	0	0	0	0	0	0	0	0	0.000447972	0	0	0	0	0	0
122	Integrin beta-3 OS=Homo sapiens GN=ITGB3 PE=1 SV=2	ITB3_HUMAN	Coagulation	87	4.85	Homo sapiens	0	0	0	0.00432335	0	0	0	0	0.00113891	0	0	0	0	0.00080543	0
37	Kininogen-1 OS=Homo sapiens GN=KNG1 PE=1 SV=2	KNG1_HUMAN	Coagulation	72	6.8	Homo sapiens	0	0	0.00883936	0	0	0	0	0	0	0	0.00427218	0.00794482	0.00883876	0.00480493	0.00554701
38	Plasminogen OS=Homo sapiens GN=PLG PE=1 SV=2	PLMN_HUMAN	Coagulation	91	7.25	Homo sapiens	0	0	0.0050479	0.00373867	0	0	0	0	0.000872242	0.00034471	0.0016662	0.00582878	0.00504734	0.00575084	0.000915456
10	Prothrombin OS=Homo sapiens GN=F2 PE=1 SV=2	THRB_HUMAN	Coagulation	70	5.7	Homo sapiens	0	0	0.0312069	0	0	0	0	0	0	0	0.0140015	0.0286169	0.0312082	0.0168622	0.019539
28	Thrombospondin-1 OS=Homo sapiens GN=THBS1 PE=1 SV=2	TSP1_HUMAN	Coagulation	129	4.51	Homo sapiens	0	0	0.00116093	0	0	0	0	0	0	0	0.00761171	0.0070428	0.00116125	0.0130034	0
80	Thrombospondin-4 OS=Homo sapiens GN=THBS4 PE=1 SV=2	TSP4_HUMAN	Coagulation	106	4.23	Homo sapiens	0	0	0.00178408	0	0	0	0	0	0	0	0.00218665	0.000465891	0.00178424	0.00142574	0.00052394
65	Vitamin K-dependent protein C OS=Homo sapiens GN=PROC PE=1 SV=1	PROC_HUMAN	Coagulation	52	6.23	Homo sapiens	0	0	0.00377589	0	0	0	0	0	0	0	0.000920761	0.00389521	0.00377593	0.00274252	0.000957208
25	Vitamin K-dependent protein S OS=Homo sapiens GN=PROS1 PE=1 SV=1	PROS_HUMAN	Coagulation	75	5.37	Homo sapiens	0	0	0.00988097	0	0	0	0	0	0	0	0.00749636	0.0093768	0.00988021	0.00581077	0.0082118
68	Vitamin K-dependent protein Z OS=Homo sapiens GN=PROZ PE=1 SV=2	PROZ_HUMAN	Coagulation	45	5.87	Homo sapiens	0	0	0.00624944	0	0	0	0	0	0	0	0	0.00244885	0.00625002	0.00118171	0
118	Complement C1q subcomponent subunit A OS=Homo sapiens GN=C1QA PE=1 SV=2	C1QA_HUMAN	Complement	26	9.45	Homo sapiens	0.00534802	0.00824082	0	0	0	0	0	0.00609812	0	0.00343633	0	0.00158249	0	0.00239911	0
127	Complement C1q subcomponent subunit B OS=Homo sapiens GN=C1QB PE=1 SV=3	C1QB_HUMAN	Complement	27	8.87	Homo sapiens	0	0	0.000978571	0	0	0	0	0	0	0	0	0.00372585	0.000978744	0.00395395	0
61	Complement C1q subcomponent subunit C OS=Homo sapiens GN=C1QC PE=1 SV=3	C1QC_HUMAN	Complement	26	8.58	Homo sapiens	0	0.00547951	0.00477814	0.00651275	0.0110171	0	0	0.0152803	0.0129775	0.0114239	0	0.00775568	0.00477811	0.00749331	0
75	Complement C1r subcomponent OS=Homo sapiens GN=C1R PE=1 SV=2	C1R_HUMAN	Complement	80	6.14	Homo sapiens	0	0	0.0017978	0	0	0	0	0	0	0	0	0.00127448	0.00179796	0.00199558	0
52	Complement C1s subcomponent OS=Homo sapiens GN=C1S PE=1 SV=1	C1S_HUMAN	Complement	77	4.59	Homo sapiens	0	0	0.00467859	0	0	0	0	0	0	0	0.00266625	0.00366381	0.00467854	0.00460545	0.00241291
3	Complement C3 OS=Homo sapiens GN=C3 PE=1 SV=2	CO3_HUMAN	Complement	187	6.34	Homo sapiens	0.0167633	0.0114608	0.020015	0.0150921	0.0166116	0.00824132	0.0124284	0.00957532	0.00859684	0.00580795	0.0155295	0.0164463	0.0200156	0.0185767	0.0221767
9	Complement C4-A OS=Homo sapiens GN=C4A PE=1 SV=2	CO4A_HUMAN	Complement	193	7.08	Homo sapiens	0.00659464	0.00535143	0.00969799	0.00321547	0.00455189	0.00371117	0.00294034	0.0030994	0.00195497	0.000928095	0.0117878	0.00931327	0.0096981	0.00901819	0.00833712
126	Complement C4-B OS=Homo sapiens GN=C4B PE=1 SV=2	CO4B_HUMAN	Complement	193	7.28	Homo sapiens	0	0	0.00990377	0	0	0	0	0	0	0	0	0.0063595	0.00990379	0.0092944	0
45	Complement C5 OS=Homo sapiens GN=C5 PE=1 SV=4	CO5_HUMAN	Complement	188	6.49	Homo sapiens	0	0	0.00250632	0	0	0	0	0	0	0	0.000524775	0.00229841	0.00250642	0.00198563	0.000295713
81	Complement component C6 OS=Homo sapiens GN=C6 PE=1 SV=3	CO6_HUMAN	Complement	105	6.74	Homo sapiens	0	0	0.00149597	0	0	0	0	0	0	0	0	0.00173749	0.00149599	0	0
170	Complement component C7 OS=Homo sapiens GN=C7 PE=1 SV=2	CO7_HUMAN	Complement	94	6.44	Homo sapiens	0	0	0.000281079	0	0	0	0	0	0	0	0	0	0.000281129	0	0
83	Complement component C8 alpha chain OS=Homo sapiens GN=C8A PE=1 SV=2	CO8A_HUMAN	Complement	65	6.41	Homo sapiens	0	0	0.00120206	0	0	0	0	0	0	0	0	0.00201889	0.00120216	0.00451275	0.0029027
102	Complement component C8 beta chain OS=Homo sapiens GN=C8B PE=1 SV=3	CO8B_HUMAN	Complement	67	8.17	Homo sapiens	0	0	0.000789946	0	0	0	0	0	0	0	0	0.00149464	0.000789714	0.00225982	0
106	Complement component C8 gamma chain OS=Homo sapiens GN=C8G PE=1 SV=3	CO8G_HUMAN	Complement	22	8.48	Homo sapiens	0	0	0.00325954	0	0	0	0	0	0	0	0	0.00322143	0.00325995	0.0048339	0
51	Complement component C9 OS=Homo sapiens GN=C9 PE=1 SV=2	CO9_HUMAN	Complement	63	5.27	Homo sapiens	0	0	0.00333272	0	0	0	0	0	0	0	0.010974	0.00621275	0.0033327	0.00901995	0.0102158
177	Complement factor B OS=Homo sapiens GN=CFB PE=1 SV=2	CFAB_HUMAN	Complement	86	7.07	Homo sapiens	0	0	0	0	0	0	0	0	0	0	0	0	0	0.000201333	0
16	Complement factor H OS=Homo sapiens GN=CFH PE=1 SV=4	CFAH_HUMAN	Complement	139	6.59	Homo sapiens	0.00299187	0	0.00791677	0.00122068	0	0	0	0.000588466	0.00428066	0.00419667	0.00291482	0.00736874	0.0079166	0.0049195	0.00480925
117	Complement factor H-related protein 1 OS=Homo sapiens GN=CFHR1 PE=1 SV=2	FHR1_HUMAN	Complement	38	7.42	Homo sapiens	0	0	0.00279295	0	0	0	0	0	0.00730148	0	0	0.00209405	0.00279296	0.00142081	0
130	Complement factor I OS=Homo sapiens GN=CFI PE=1 SV=2	CFAI_HUMAN	Complement	66	7.53	Homo sapiens	0	0	0.00139627	0	0	0	0	0	0	0	0	0.000595861	0.00139623	0	0
56	Ig alpha-1 chain C region OS=Homo sapiens GN=IGHA1 PE=1 SV=2	IGHA1_HUMAN	Immunoglobulins	38	6.49	Homo sapiens	0.00365917	0.0121003	0.00535735	0.00257496	0.00619678	0.00811655	0.00688242	0	0.00626484	0.00352676	0.00480147	0.00553509	0.00535705	0.00467849	0.00773726
89	Ig alpha-2 chain C region OS=Homo sapiens GN=IGHA2 PE=1 SV=3	IGHA2_HUMAN	Immunoglobulins	37	6.02	Homo sapiens	0	0	0.00584825	0	0	0	0	0	0	0	0	0.00233657	0.00584817	0.00389123	0
4	Ig gamma-1 chain C region OS=Homo sapiens GN=IGHG1 PE=1 SV=1	IGHG1_HUMAN	Immunoglobulins	36	8.31	Homo sapiens	0.124061	0.0743245	0.024347	0.116409	0.0892203	0.0838113	0.0714138	0.0820852	0.135554	0.0881337	0.0191642	0.031157	0.023812	0.0486067	0.0231995
23	Ig gamma-2 chain C region OS=Homo sapiens GN=IGHG2 PE=1 SV=2	IGHG2_HUMAN	Immunoglobulins	36	7.66	Homo sapiens	0	0.0505739	0.0137651	0.0801395	0.0569072	0.0109313	0.033856	0.0487126	0.0798726	0.0561437	0.00211576	0.00947621	0.013958	0.0211819	0
58	Ig gamma-3 chain C region OS=Homo sapiens GN=IGHG3 PE=1 SV=2	IGHG3_HUMAN	Immunoglobulins	41	7.95	Homo sapiens	0.0271314	0	0.0156587	0.0238654	0	0.0134704	0	0.0157508	0.0749741	0.033916	0.0126691	0.0171859	0.0158141	0.0186254	0
121	Ig gamma-4 chain C region OS=Homo sapiens GN=IGHG4 PE=1 SV=1	IGHG4_HUMAN	Immunoglobulins	36	7.41	Homo sapiens	0	0	0.00904965	0	0	0	0	0	0	0.0109517	0	0.00453611	0.0094188	0	0
120	Ig heavy chain V-I region V35 OS=Homo sapiens PE=1 SV=1	HV103_HUMAN	Immunoglobulins	13	9.87	Homo sapiens	0	0	0	0	0	0	0.0201178	0	0	0	0	0.00154732	0	0	0
156	Ig heavy chain V-II region ARH-77 OS=Homo sapiens PE=4 SV=1	HV209_HUMAN	Immunoglobulins	16	8.45	Homo sapiens	0	0	0	0	0	0	0	0	0.00499406	0	0	0	0	0	0
115	Ig heavy chain V-III region 23 OS=Homo sapiens GN=IGHV3-23 PE=1 SV=2	HV303_HUMAN	Immunoglobulins	13	8.46	Homo sapiens	0	0	0.00203884	0	0.0129868	0	0	0	0.0213768	0.0206013	0	0	0.00253127	0.00206045	0
133	Ig heavy chain V-III region GA OS=Homo sapiens PE=1 SV=1	HV308_HUMAN	Immunoglobulins	13	10.02	Homo sapiens	0	0	0	0	0	0	0	0	0	0	0	0	0	0.00139513	0
147	Ig heavy chain V-III region GAL OS=Homo sapiens PE=1 SV=1	HV320_HUMAN	Immunoglobulins	13	8.7	Homo sapiens	0	0	0	0	0	0	0	0	0.0121887	0.00241297	0	0	0	0	0
14	Ig kappa chain C region OS=Homo sapiens GN=IGKC PE=1 SV=1	IGKC_HUMAN	Immunoglobulins	12	5.68	Homo sapiens	0.188988	0.157199	0.0288759	0.092183	0.150978	0.176032	0.166131	0.159395	0.165321	0.114006	0.0233349	0.0460674	0.028879	0.0479734	0.0809382
155	Ig kappa chain V-I region HK102 (Fragment) OS=Homo sapiens GN=IGKV1-5 PE=4 SV=1	KV110_HUMAN	Immunoglobulins	13	8.46	Homo sapiens	0	0	0	0	0	0	0	0	0	0.00668954	0	0	0	0	0.0102435
86	Ig kappa chain V-III region HIC OS=Homo sapiens PE=1 SV=2	KV313_HUMAN	Immunoglobulins	14	4.85	Homo sapiens	0	0	0.00519188	0	0.0170609	0	0	0	0	0.00224061	0	0	0.00518812	0.00191328	0
164	Ig kappa chain V-IV region (Fragment) OS=Homo sapiens GN=IGKV4-1 PE=4 SV=1	KV401_HUMAN	Immunoglobulins	13	4.85	Homo sapiens	0	0	0	0	0	0	0	0	0.0091563	0	0	0	0	0	0
124	Ig lambda chain V-I region HA OS=Homo sapiens PE=1 SV=1	LV102_HUMAN	Immunoglobulins	12	5.69	Homo sapiens	0	0	0.00220875	0	0	0	0	0	0.00332938	0	0	0	0.00113676	0	0
148	Ig lambda chain V-III region LOI OS=Homo sapiens PE=1 SV=1	LV302_HUMAN	Immunoglobulins	12	4.72	Homo sapiens	0	0	0.0027778	0	0	0	0	0	0.0066342	0	0	0	0.00331059	0	0
21	Ig lambda-2 chain C regions OS=Homo sapiens GN=IGLC2 PE=1 SV=1	LAC2_HUMAN	Immunoglobulins	11	7.34	Homo sapiens	0.186735	0.187837	0.0238714	0.169629	0.169797	0.148905	0.142881	0.144649	0.111816	0.100299	0.0623563	0.046515	0.0238852	0.049274	0.102395
142	Ig lambda-7 chain C region OS=Homo sapiens GN=IGLC7 PE=4 SV=2	LAC7_HUMAN	Immunoglobulins	11	8.48	Homo sapiens	0	0	0	0	0	0	0	0	0	0	0	0	0	0	0.0294124
5	Ig mu chain C region OS=Homo sapiens GN=IGHM PE=1 SV=3	IGHM_HUMAN	Immunoglobulins	49	6.77	Homo sapiens	0.118328	0.0797114	0.0204716	0.0378109	0.201086	0.0481917	0.0631918	0.105936	0.0356206	0.0568044	0.0246063	0.0223677	0.0204706	0.0117821	0.0668101
63	Immunoglobulin J chain OS=Homo sapiens GN=IGJ PE=1 SV=4	IGJ_HUMAN	Immunoglobulins	18	4.87	Homo sapiens	0	0.00769006	0.00690175	0	0.0422653	0	0.00959737	0.0199395	0	0.00992717	0.00999513	0.00401289	0.00690172	0.00296158	0.0134089
46	Immunoglobulin lambda-like polypeptide 5 OS=Homo sapiens GN=IGLL5 PE=2 SV=2	IGLL5_HUMAN	Immunoglobulins	23	9.05	Homo sapiens	0.0275465	0.0295958	0.00944325	0.0241458	0.0304049	0.0376904	0.0169491	0.0240339	0.0258701	0.0188443	0.00312258	0.0074547	0.00944259	0.00617081	0.00795394
27	Apolipoprotein A-I OS=Homo sapiens GN=APOA1 PE=1 SV=1	APOA1_HUMAN	Lipoproteins	31	5.5	Homo sapiens	0.00668699	0	0.021287	0.00434296	0	0	0.00286385	0	0	0	0.016756	0.021624	0.0212883	0.0157779	0.0147688
92	Apolipoprotein A-II OS=Homo sapiens GN=APOA2 PE=1 SV=1	APOA2_HUMAN	Lipoproteins	11	6.6	Homo sapiens	0	0	0.0106324	0	0	0	0	0	0	0	0	0.0100596	0.0106348	0.00644495	0
50	Apolipoprotein A-IV OS=Homo sapiens GN=APOA4 PE=1 SV=3	APOA4_HUMAN	Lipoproteins	45	5.05	Homo sapiens	0	0	0.00758911	0	0	0	0	0	0	0	0.00973734	0.00896187	0.0075882	0.00810005	0.00295736
1	Apolipoprotein B-100 OS=Homo sapiens GN=APOB PE=1 SV=2	APOB_HUMAN	Lipoproteins	516	7.04	Homo sapiens	0.00730456	0.00774466	0.00951681	0.0144934	0.00250268	0.00191925	0.00414551	0.00130698	0.00365237	0.0012374	0.00356542	0.00820388	0.00951687	0.00832001	0.00145702
152	Apolipoprotein C-I OS=Homo sapiens GN=APOC1 PE=1 SV=1	APOC1_HUMAN	Lipoproteins	9	9.17	Homo sapiens	0	0	0	0	0	0	0	0	0	0	0	0	0	0.00198414	0
66	Apolipoprotein C-II OS=Homo sapiens GN=APOC2 PE=1 SV=1	APOC2_HUMAN	Lipoproteins	11	4.36	Homo sapiens	0	0	0.0171921	0	0	0	0	0	0	0	0.012003	0.0202013	0.0171936	0.00569602	0
30	Apolipoprotein C-III OS=Homo sapiens GN=APOC3 PE=1 SV=1	APOC3_HUMAN	Lipoproteins	11	5.04	Homo sapiens	0	0	0.0464345	0	0	0	0	0	0	0	0.0217634	0.0218652	0.0464379	0.0217953	0.00757332
12	Apolipoprotein D OS=Homo sapiens GN=APOD PE=1 SV=1	APOD_HUMAN	Lipoproteins	21	4.79	Homo sapiens	0.0777828	0.0693257	0.0412202	0.0932567	0.00552039	0.0587484	0.0601542	0.0435084	0.0273953	0.0122022	0.117542	0.0498179	0.0412184	0.0431412	0.0840072
26	Apolipoprotein E OS=Homo sapiens GN=APOE PE=1 SV=1	APOE_HUMAN	Lipoproteins	36	5.42	Homo sapiens	0	0	0.0165305	0.00192777	0	0	0	0	0	0	0.0150231	0.0212368	0.0165305	0.0157621	0.00824793
134	Apolipoprotein F OS=Homo sapiens GN=APOF PE=1 SV=2	APOF_HUMAN	Lipoproteins	35	5.36	Homo sapiens	0	0	0.00186531	0	0	0	0	0	0	0	0	0.00112362	0.00186563	0	0
168	Apolipoprotein L1 OS=Homo sapiens GN=APOL1 PE=1 SV=5	APOL1_HUMAN	Lipoproteins	44	5.55	Homo sapiens	0	0	0.000728089	0	0	0	0	0	0	0	0	0	0.000728418	0	0
69	Apolipoprotein M OS=Homo sapiens GN=APOM PE=1 SV=2	APOM_HUMAN	Lipoproteins	21	5.92	Homo sapiens	0	0	0.00939234	0	0	0	0	0	0	0	0	0.0072501	0.0093907	0.00548925	0
43	Apolipoprotein(a) OS=Homo sapiens GN=LPA PE=1 SV=1	APOA_HUMAN	Lipoproteins	501	5.77	Homo sapiens	0.00126546	0.00027629	0.000743902	0.00233644	0	0.000419256	0	0	0.000870667	0.000178332	0	0.000720117	0.000757453	0.00122393	0
29	CD5 antigen-like OS=Homo sapiens GN=CD5L PE=1 SV=1	CD5L_HUMAN	Others	38	5.15	Homo sapiens	0.0186393	0.0198026	0.00740065	0.00634624	0.0232109	0.0162331	0.0114277	0.0314834	0.00887468	0.0152826	0.00616654	0.00972304	0.00740135	0.00748074	0.0211734
93	Hemoglobin subunit alpha OS=Homo sapiens GN=HBA1 PE=1 SV=2	HBA_HUMAN	Others	15	9.09	Homo sapiens	0	0	0	0.00652322	0	0.00730877	0	0.0158551	0	0.00287713	0	0	0	0	0
84	Hemoglobin subunit beta OS=Homo sapiens GN=HBB PE=1 SV=2	HBB_HUMAN	Others	16	7.32	Homo sapiens	0	0	0.00365881	0.00841449	0	0.00614886	0.00555278	0.0101575	0	0.00927516	0.00616611	0.00377229	0.00365845	0.00443963	0
47	Protein AMBP OS=Homo sapiens GN=AMBP PE=1 SV=1	AMBP_HUMAN	Others	39	6.15	Homo sapiens	0	0	0.0134295	0	0	0	0	0	0	0	0.00727326	0.0126035	0.0134294	0.00683801	0.00547597
41	Serotransferrin OS=Homo sapiens GN=TF PE=1 SV=3	TRFE_HUMAN	Others	77	7.13	Homo sapiens	0	0.00501293	0.00475731	0.00313191	0	0	0.0107344	0.004137	0.00205784	0.00211695	0.00269929	0.00404995	0.00475715	0.00599351	0.00454002
6	Serum albumin OS=Homo sapiens GN=ALB PE=1 SV=2	ALBU_HUMAN	Others	69	6.21	Homo sapiens	0.0533163	0.0259784	0.021904	0.0229263	0.0321865	0.029701	0.0449469	0.0277131	0.0189676	0.0112116	0.0295127	0.0272757	0.0219047	0.0280799	0.0272206
91	Actin, cytoplasmic 1 OS=Homo sapiens GN=ACTB PE=1 SV=1	ACTB_HUMAN	Tissue Linkage	42	5.15	Homo sapiens	0	0	0.00030391	0	0	0	0	0	0.00803999	0.000746871	0.00133013	0.00122999	0.000304404	0.00382732	0
99	Gelsolin OS=Homo sapiens GN=GSN PE=1 SV=1	GELS_HUMAN	Tissue Linkage	86	6.19	Homo sapiens	0	0	0.00114203	0	0	0	0	0	0	0	0	0.00151534	0.0011419	0.00124451	0
17	Keratin, type I cytoskeletal 10 OS=Homo sapiens GN=KRT10 PE=1 SV=6	K1C10_HUMAN	Tissue Linkage	59	4.88	Homo sapiens	0.00965546	0.0205724	0.00553342	0.0226836	0.0199516	0.0408401	0.0192368	0.0222197	0.00874062	0.0300058	0.0131629	0.00647123	0.00553415	0.00723997	0.00498428
151	Keratin, type I cytoskeletal 13 OS=Homo sapiens GN=KRT13 PE=1 SV=4	K1C13_HUMAN	Tissue Linkage	50	4.61	Homo sapiens	0	0	0	0	0	0	0	0	0	0.0101459	0	0	0	0	0
39	Keratin, type I cytoskeletal 14 OS=Homo sapiens GN=KRT14 PE=1 SV=4	K1C14_HUMAN	Tissue Linkage	52	4.81	Homo sapiens	0.00553172	0.0150621	0.0021436	0.0170892	0	0.026691	0.0360605	0.0221824	0.00686212	0.0269248	0.00947984	0.00385146	0.00214319	0.00479285	0
70	Keratin, type I cytoskeletal 16 OS=Homo sapiens GN=KRT16 PE=1 SV=4	K1C16_HUMAN	Tissue Linkage	51	4.69	Homo sapiens	0	0.00522567	0	0	0	0.0312027	0.0350268	0	0	0.0274613	0.0111024	0	0	0.00488682	0
85	Keratin, type I cytoskeletal 17 OS=Homo sapiens GN=KRT17 PE=1 SV=2	K1C17_HUMAN	Tissue Linkage	48	4.67	Homo sapiens	0	0.00474001	0	0	0	0.0213264	0.0253927	0.0190986	0	0.0198348	0.0043831	0	0	0	0
11	Keratin, type I cytoskeletal 9 OS=Homo sapiens GN=KRT9 PE=1 SV=3	K1C9_HUMAN	Tissue Linkage	62	4.89	Homo sapiens	0.0275579	0.0309865	0.00558888	0.0361175	0.0245412	0.0382105	0.0372096	0.0224232	0.0115192	0.0463698	0.0167793	0.00987511	0.00558949	0.012884	0.00724406
8	Keratin, type II cytoskeletal 1 OS=Homo sapiens GN=KRT1 PE=1 SV=6	K2C1_HUMAN	Tissue Linkage	66	8.33	Homo sapiens	0.0204165	0.0475688	0.0102257	0.0474663	0.0363665	0.0694918	0.0514775	0.0550439	0.0192351	0.0568687	0.0301288	0.0151167	0.0100306	0.0154713	0.0101286
40	Keratin, type II cytoskeletal 2 epidermal OS=Homo sapiens GN=KRT2 PE=1 SV=2	K22E_HUMAN	Tissue Linkage	65	8.17	Homo sapiens	0	0.0230657	0.00291437	0.0200798	0	0.0365178	0.0247494	0.0215269	0.0021227	0.023813	0.0130304	0.00400982	0.00291491	0.00492926	0.0036676
188	Keratin, type II cytoskeletal 4 OS=Homo sapiens GN=KRT4 PE=1 SV=4	K2C4_HUMAN	Tissue Linkage	57	6.55	Homo sapiens	0	0	0	0	0	0	0	0	0	0.00599463	0	0	0	0	0
54	Keratin, type II cytoskeletal 5 OS=Homo sapiens GN=KRT5 PE=1 SV=3	K2C5_HUMAN	Tissue Linkage	62	7.91	Homo sapiens	0	0.0149722	0.00128566	0.0105495	0	0.0264601	0.027459	0.014818	0.00543979	0.0197245	0.0104198	0.0021531	0.00128559	0.00228692	0.00200705
42	Keratin, type II cytoskeletal 6A OS=Homo sapiens GN=KRT6A PE=1 SV=3	K2C6A_HUMAN	Tissue Linkage	60	8.16	Homo sapiens	0	0.0112346	0.00045524	0.00916051	0.0107756	0.0222784	0.0335542	0.0153209	0.0042987	0.0255468	0.0121213	0.00252248	0.000454704	0.00222119	0
184	Keratin, type II cytoskeletal 78 OS=Homo sapiens GN=KRT78 PE=2 SV=2	K2C78_HUMAN	Tissue Linkage	57	5.83	Homo sapiens	0	0	0	0	0	0	0	0	0	0.00211017	0	0	0	0	0
167	14-3-3 protein zeta/delta OS=Homo sapiens GN=YWHAZ PE=1 SV=1	1433Z_HUMAN		28	4.43	Homo sapiens	0	0	0	0	0	0	0	0	0	0	0	0	0	0.00253194	0
178	Afamin OS=Homo sapiens GN=AFM PE=1 SV=1	AFAM_HUMAN		69	5.7	Homo sapiens	0	0	0.000464289	0	0	0	0	0	0	0	0	0	0.000464499	0	0
162	Aggrecan core protein OS=Homo sapiens GN=ACAN PE=1 SV=2	PGCA_HUMAN		250	3.82	Homo sapiens	0	0	0.00010602	0	0	0	0	0	0	0	0	0	0.000105939	7.1429e-05	0
185	Alpha-amylase 1 OS=Homo sapiens GN=AMY1A PE=1 SV=2	AMY1_HUMAN		58	6.92	Homo sapiens	0	0	0	0	0	0	0	0	0.000683757	0	0	0	0	0	0
160	Amyloid beta A4 protein OS=Homo sapiens GN=APP PE=1 SV=3	A4_HUMAN		87	4.45	Homo sapiens	0	0	0	0	0	0	0	0	0	0	0	0.000241721	0	0.0012286	0
165	Angiopoietin-related protein 6 OS=Homo sapiens GN=ANGPTL6 PE=1 SV=1	ANGL6_HUMAN		52	8.64	Homo sapiens	0	0	0.000615272	0	0	0	0	0	0	0	0	0	0.00061579	0	0
112	Angiotensinogen OS=Homo sapiens GN=AGT PE=1 SV=1	ANGT_HUMAN		53	6.27	Homo sapiens	0	0	0.00235163	0	0	0	0	0	0	0	0	0.00169968	0.0023515	0	0
67	Beta-2-glycoprotein 1 OS=Homo sapiens GN=APOH PE=1 SV=3	APOH_HUMAN		38	8.03	Homo sapiens	0	0	0	0	0	0	0	0	0.0355189	0.00470234	0	0.00158833	0	0.00374578	0
101	Beta-Ala-His dipeptidase OS=Homo sapiens GN=CNDP1 PE=1 SV=4	CNDP1_HUMAN		57	4.95	Homo sapiens	0	0	0.0011461	0	0	0	0	0	0	0	0	0.000368942	0.00114608	0.00373605	0
7	C4b-binding protein alpha chain OS=Homo sapiens GN=C4BPA PE=1 SV=2	C4BPA_HUMAN		67	7.31	Homo sapiens	0.0180365	0.00948648	0.0257821	0.00877566	0.0103601	0.00535279	0	0.0196419	0.00385134	0.0113412	0.059531	0.0323626	0.0257827	0.0302409	0.0634267
64	C4b-binding protein beta chain OS=Homo sapiens GN=C4BPB PE=1 SV=1	C4BPB_HUMAN		28	4.8	Homo sapiens	0	0	0.00795748	0	0	0	0	0	0	0	0.0119441	0.00646677	0.00795728	0.00537807	0.00851608
113	Calmodulin-like protein 5 OS=Homo sapiens GN=CALML5 PE=1 SV=2	CALL5_HUMAN		16	4.05	Homo sapiens	0	0	0	0	0	0	0	0	0.0074395	0.00935632	0	0	0	0	0
104	Calreticulin OS=Homo sapiens GN=CALR PE=1 SV=1	CALR_HUMAN		48	4.04	Homo sapiens	0	0	0.0013703	0	0	0	0	0	0	0	0.00321923	0.00167661	0.00136988	0.00184916	0
169	Carboxypeptidase N catalytic chain OS=Homo sapiens GN=CPN1 PE=1 SV=1	CBPN_HUMAN		52	7.36	Homo sapiens	0	0	0.000245466	0	0	0	0	0	0	0	0	0	0.000245865	0	0
31	Cartilage oligomeric matrix protein OS=Homo sapiens GN=COMP PE=1 SV=2	COMP_HUMAN		83	4.16	Homo sapiens	0	0	0.00707533	0	0	0	0	0	0	0	0.00462367	0.00835715	0.00707631	0.00866403	0.00384289
32	Ceruloplasmin OS=Homo sapiens GN=CP PE=1 SV=1	CERU_HUMAN		122	5.5	Homo sapiens	0	0	0.00460098	0	0	0	0	0	0	0	0.00467388	0.00494726	0.00460135	0.00458587	0.00220643
36	Clusterin OS=Homo sapiens GN=CLU PE=1 SV=1	CLUS_HUMAN		52	6.21	Homo sapiens	0	0	0.0102198	0	0	0	0	0	0	0	0.00499457	0.0102004	0.0102192	0.0123047	0.00309436
181	Collectin-10 OS=Homo sapiens GN=COLEC10 PE=2 SV=2	COL10_HUMAN		31	7.39	Homo sapiens	0	0	0	0	0	0	0	0	0	0	0	0.000678378	0	0	0
144	Collectin-11 OS=Homo sapiens GN=COLEC11 PE=1 SV=1	COL11_HUMAN		29	5.06	Homo sapiens	0	0	0.00135411	0	0	0	0	0	0	0	0	0.00312189	0.00135413	0	0
98	Dermcidin OS=Homo sapiens GN=DCD PE=1 SV=2	DCD_HUMAN		11	6.52	Homo sapiens	0.0135092	0.00908554	0	0.0128387	0	0.0091287	0	0	0.00363205	0.0108756	0	0	0	0.00322284	0
166	Desmocollin-1 OS=Homo sapiens GN=DSC1 PE=1 SV=2	DSC1_HUMAN		100	5.08	Homo sapiens	0	0	0	0	0	0	0	0	0	0.000893445	0	0	0	0	0
180	Desmoglein-1 OS=Homo sapiens GN=DSG1 PE=1 SV=2	DSG1_HUMAN		114	4.66	Homo sapiens	0	0	0	0	0	0	0	0	0	0.0010475	0	0	0	0	0
111	Desmoplakin OS=Homo sapiens GN=DSP PE=1 SV=3	DESP_HUMAN		332	6.78	Homo sapiens	0	0	0	0	0	0	0	0	0	0.00112303	0	0	0	0	0
187	Dickkopf-related protein 3 OS=Homo sapiens GN=DKK3 PE=1 SV=2	DKK3_HUMAN		38	4.3	Homo sapiens	0	0	0.000335901	0	0	0	0	0	0	0	0	0	0.000336447	0	0
161	Elongation factor 1-alpha 1 OS=Homo sapiens GN=EEF1A1 PE=1 SV=1	EF1A1_HUMAN		50	9.5	Homo sapiens	0	0	0.000255285	0	0	0	0	0	0	0	0.00213287	0	0.0002557	0	0
131	Endoplasmin OS=Homo sapiens GN=HSP90B1 PE=1 SV=1	ENPL_HUMAN		92	4.48	Homo sapiens	0	0	0.000208113	0	0	0	0	0	0	0	0	0	0.000208451	0	0
157	Erythrocyte band 7 integral membrane protein OS=Homo sapiens GN=STOM PE=1 SV=3	STOM_HUMAN		32	8.07	Homo sapiens	0	0	0	0	0	0	0	0	0.00371975	0	0	0	0	0	0
192	Extracellular glycoprotein lacritin OS=Homo sapiens GN=LACRT PE=1 SV=1	LACRT_HUMAN		14	5.2	Homo sapiens	0	0	0	0	0	0	0	0	0	0.00638175	0	0	0	0	0
175	Extracellular superoxide dismutase [Cu-Zn] OS=Homo sapiens GN=SOD3 PE=1 SV=2	SODE_HUMAN		26	6.59	Homo sapiens	0	0	0	0	0	0	0	0	0	0	0.00195301	0	0	0.000686817	0
132	Ezrin OS=Homo sapiens GN=EZR PE=1 SV=4	EZRI_HUMAN		69	6.17	Homo sapiens	0	0	0	0	0	0.0014553	0	0	0	0	0	0	0	0	0
48	Fibronectin OS=Homo sapiens GN=FN1 PE=1 SV=4	FINC_HUMAN		263	5.45	Homo sapiens	0	0	0.00196904	0	0	0	0	0	0	0	0.000182052	0.00152477	0.00196887	0.00105004	0.00021117
176	Fibulin-1 OS=Homo sapiens GN=FBLN1 PE=1 SV=4	FBLN1_HUMAN		77	4.86	Homo sapiens	0	0	0	0	0	0	0	0	0	0	0	0	0	0.000224865	0
116	Ficolin-2 OS=Homo sapiens GN=FCN2 PE=1 SV=2	FCN2_HUMAN		34	6.77	Homo sapiens	0	0.0063018	0	0	0	0	0.00507904	0	0.00409976	0.00262778	0.0016431	0	0	0	0
82	Ficolin-3 OS=Homo sapiens GN=FCN3 PE=1 SV=2	FCN3_HUMAN		33	6.66	Homo sapiens	0	0	0.00455424	0	0.00723798	0	0	0	0	0.000871859	0	0.00333934	0.00455417	0.000524685	0.00487595
172	Filaggrin OS=Homo sapiens GN=FLG PE=1 SV=3	FILA_HUMAN		435	9.6	Homo sapiens	0	0	0	0	0	0	0	0	0	0.000166349	0	0	0	0	0
150	Filaggrin-2 OS=Homo sapiens GN=FLG2 PE=1 SV=1	FILA2_HUMAN		248	8.35	Homo sapiens	0	0	0	0	0	0	0	0.000964814	0	0.000662514	0	0	0	0	0
95	Filamin-A OS=Homo sapiens GN=FLNA PE=1 SV=4	FLNA_HUMAN		281	5.95	Homo sapiens	0	0.0012623	0	0.00147686	0	0	0	0	0.000635402	0.000566995	0	7.48388e-05	0	0.000282137	0
125	Galectin-3-binding protein OS=Homo sapiens GN=LGALS3BP PE=1 SV=1	LG3BP_HUMAN		65	4.9	Homo sapiens	0	0	0	0	0.0089473	0	0	0	0	0.000442636	0	0.000309463	0	0	0.00170972
186	Glucosidase 2 subunit beta OS=Homo sapiens GN=PRKCSH PE=1 SV=2	GLU2B_HUMAN		59	4.05	Homo sapiens	0	0	0	0	0	0	0	0	0	0	0	0.000356436	0	0	0
154	Glutathione peroxidase 3 OS=Homo sapiens GN=GPX3 PE=1 SV=2	GPX3_HUMAN		26	8.29	Homo sapiens	0	0	0.00151035	0	0	0	0	0	0	0	0	0	0.00151037	0	0
183	Glyceraldehyde-3-phosphate dehydrogenase OS=Homo sapiens GN=GAPDH PE=1 SV=3	G3P_HUMAN		36	8.73	Homo sapiens	0	0	0	0	0	0	0	0	0	0.00161044	0	0	0	0	0
163	Heat shock 70 kDa protein 1-like OS=Homo sapiens GN=HSPA1L PE=1 SV=2	HS71L_HUMAN		70	5.82	Homo sapiens	0	0	0.000378643	0	0	0	0	0	0	0	0.000725403	0	0.000378353	0	0
105	Hemopexin OS=Homo sapiens GN=HPX PE=1 SV=2	HEMO_HUMAN		52	7.02	Homo sapiens	0	0	0.00201068	0	0	0	0	0	0	0	0	0.000976083	0.0020109	0.00136351	0
62	Heparin cofactor 2 OS=Homo sapiens GN=SERPIND1 PE=1 SV=3	HEP2_HUMAN		57	6.89	Homo sapiens	0	0	0.00423993	0	0	0	0	0	0	0	0.00409183	0.00280782	0.00423984	0.00202236	0.00326053
60	Histidine-rich glycoprotein OS=Homo sapiens GN=HRG PE=1 SV=1	HRG_HUMAN		60	7.52	Homo sapiens	0	0	0.00501432	0	0	0	0	0	0	0.00273839	0	0.0026901	0.00501477	0.00222338	0.00231548
34	Hornerin OS=Homo sapiens GN=HRNR PE=1 SV=2	HORN_HUMAN		282	10.24	Homo sapiens	0	0.00608551	0	0.00376765	0.000411093	0.00400606	0.0051008	0.000984578	0.000420635	0.00474393	0.00034985	0.000389152	0	0.000630959	0
15	Hyaluronan-binding protein 2 OS=Homo sapiens GN=HABP2 PE=1 SV=1	HABP2_HUMAN		63	6.52	Homo sapiens	0	0	0.0169206	0	0	0	0	0	0	0	0.0236867	0.0176949	0.0169222	0.0201556	0.0221051
19	Inter-alpha-trypsin inhibitor heavy chain H1 OS=Homo sapiens GN=ITIH1 PE=1 SV=3	ITIH1_HUMAN		101	6.78	Homo sapiens	0	0	0.0115201	0	0	0	0	0	0	0	0.00354827	0.00903207	0.0115207	0.00747225	0.00554716
18	Inter-alpha-trypsin inhibitor heavy chain H2 OS=Homo sapiens GN=ITIH2 PE=1 SV=2	ITIH2_HUMAN		106	6.85	Homo sapiens	0	0	0.0106634	0	0	0	0	0	0	0	0.00902378	0.00956359	0.0106639	0.00729088	0.00633391
44	Inter-alpha-trypsin inhibitor heavy chain H3 OS=Homo sapiens GN=ITIH3 PE=1 SV=2	ITIH3_HUMAN		100	5.49	Homo sapiens	0	0	0.00556109	0	0	0	0	0	0	0	0.0033553	0.00499789	0.00556139	0.00399543	0.00133166
90	Inter-alpha-trypsin inhibitor heavy chain H4 OS=Homo sapiens GN=ITIH4 PE=1 SV=4	ITIH4_HUMAN		103	6.97	Homo sapiens	0	0	0.00133873	0	0	0	0	0	0	0	0	0.00117197	0.00133856	0.000776338	0
159	Junction plakoglobin OS=Homo sapiens GN=JUP PE=1 SV=3	PLAK_HUMAN		82	6.05	Homo sapiens	0	0	0	0	0	0	0	0	0	0.00145627	0	0	0	0	0
145	Lipocalin-1 OS=Homo sapiens GN=LCN1 PE=1 SV=1	LCN1_HUMAN		19	5.3	Homo sapiens	0	0	0	0	0	0	0	0	0	0.00153709	0	0	0	0	0
96	Lumican OS=Homo sapiens GN=LUM PE=1 SV=2	LUM_HUMAN		38	6.6	Homo sapiens	0	0	0.00308955	0	0	0	0	0	0	0	0.00125999	0.00235858	0.00308975	0.00140286	0
140	Lysozyme C OS=Homo sapiens GN=LYZ PE=1 SV=1	LYSC_HUMAN		17	9.35	Homo sapiens	0	0	0	0	0	0	0	0	0.00465173	0.00169243	0	0	0	0	0
97	Mannan-binding lectin serine protease 1 OS=Homo sapiens GN=MASP1 PE=1 SV=3	MASP1_HUMAN		79	5.18	Homo sapiens	0	0	0.00215607	0	0	0	0	0	0	0	0	0	0.00215596	0.00146437	0
128	Mannan-binding lectin serine protease 2 OS=Homo sapiens GN=MASP2 PE=1 SV=4	MASP2_HUMAN		76	5.37	Homo sapiens	0	0	0.000943001	0	0	0	0	0	0	0	0	0.000529493	0.000943283	0.000473604	0
136	Nephronectin OS=Homo sapiens GN=NPNT PE=2 SV=3	NPNT_HUMAN		62	8.38	Homo sapiens	0	0	0	0	0	0	0	0	0.000635831	0	0	0	0	0	0
171	Neutrophil defensin 1 OS=Homo sapiens GN=DEFA1 PE=1 SV=1	DEF1_HUMAN		10	7.04	Homo sapiens	0	0	0	0.0134632	0	0	0	0	0.00790794	0	0	0	0	0	0
79	Phosphatidylcholine-sterol acyltransferase OS=Homo sapiens GN=LCAT PE=1 SV=1	LCAT_HUMAN		50	6.04	Homo sapiens	0	0	0.00157886	0	0	0	0	0	0	0	0.00309046	0.00402381	0.00157876	0.00372617	0.00321813
109	Phosphatidylinositol-glycan-specific phospholipase D OS=Homo sapiens GN=GPLD1 PE=1 SV=3	PHLD_HUMAN		92	6.33	Homo sapiens	0	0	0.00113602	0	0	0	0	0	0	0	0	0.00119284	0.00113628	0.000479353	0
179	Phospholipid transfer protein OS=Homo sapiens GN=PLTP PE=1 SV=1	PLTP_HUMAN		55	7.01	Homo sapiens	0	0	0.000233596	0	0	0	0	0	0	0	0	0	0.00023352	0	0
103	Pigment epithelium-derived factor OS=Homo sapiens GN=SERPINF1 PE=1 SV=4	PEDF_HUMAN		46	6.33	Homo sapiens	0	0	0.00228355	0	0	0	0	0	0	0	0	0.00134168	0.00228313	0.000376405	0
173	Plasma kallikrein OS=Homo sapiens GN=KLKB1 PE=1 SV=1	KLKB1_HUMAN		71	8.26	Homo sapiens	0	0	0.000180955	0	0	0	0	0	0	0	0	0	0.000180896	0	0
153	Pre-mRNA-splicing factor CWC25 homolog OS=Homo sapiens GN=CWC25 PE=1 SV=1	CWC25_HUMAN		50	10.9	Homo sapiens	0	0	0	0	0	0	0.00177559	0.00314954	0	0	0	0	0	0	0
146	Prenylcysteine oxidase 1 OS=Homo sapiens GN=PCYOX1 PE=1 SV=3	PCYOX_HUMAN		57	6.1	Homo sapiens	0	0	0	0.00171664	0	0	0	0	0	0	0	0	0	0.00109202	0
191	Prolactin-inducible protein OS=Homo sapiens GN=PIP PE=1 SV=1	PIP_HUMAN		17	8.18	Homo sapiens	0	0	0	0	0	0	0	0	0	0.00171792	0	0	0	0	0
76	Properdin OS=Homo sapiens GN=CFP PE=1 SV=2	PROP_HUMAN		51	7.92	Homo sapiens	0	0.0110659	0.000401682	0.00204116	0	0	0.00338603	0.00308779	0.00272565	0.00525556	0	0	0.000401209	0	0.00217905
77	Protein Z-dependent protease inhibitor OS=Homo sapiens GN=SERPINA10 PE=1 SV=1	ZPI_HUMAN		51	8.58	Homo sapiens	0	0	0.00271164	0	0	0	0	0	0	0	0	0.00277019	0.00271119	0.00174023	0
87	Retinol-binding protein 4 OS=Homo sapiens GN=RBP4 PE=1 SV=3	RET4_HUMAN		23	5.85	Homo sapiens	0	0	0.00738621	0	0	0	0	0	0	0	0	0.00302172	0.00738666	0.00234743	0
100	Secreted phosphoprotein 24 OS=Homo sapiens GN=SPP2 PE=1 SV=1	SPP24_HUMAN		24	8.46	Homo sapiens	0	0	0.00409054	0	0	0	0	0	0	0	0	0.00586808	0.00409059	0.00519225	0
143	Selenoprotein P OS=Homo sapiens GN=SEPP1 PE=1 SV=3	SEPP1_HUMAN		43	7.92	Homo sapiens	0	0	0.00106166	0	0	0	0	0	0	0	0	0	0.00106191	0.000415285	0
149	Serglycin OS=Homo sapiens GN=SRGN PE=1 SV=3	SRGN_HUMAN		18	4.57	Homo sapiens	0	0	0	0	0	0	0	0	0	0	0.00822148	0.0039373	0	0.00195399	0
33	Serum paraoxonase/arylesterase 1 OS=Homo sapiens GN=PON1 PE=1 SV=3	PON1_HUMAN		40	4.89	Homo sapiens	0	0	0.0153764	0	0	0	0	0	0	0	0.00139664	0.0135802	0.0153768	0.018414	0.00804532
123	Serum paraoxonase/lactonase 3 OS=Homo sapiens GN=PON3 PE=1 SV=3	PON3_HUMAN		40	5.1	Homo sapiens	0	0	0.00159971	0	0	0	0	0	0	0	0	0.000720441	0.00160105	0.00132942	0
182	Small proline-rich protein 2A OS=Homo sapiens GN=SPRR2A PE=1 SV=1	SPR2A_HUMAN		8	8.49	Homo sapiens	0	0	0	0	0	0	0	0	0	0.0147916	0	0	0	0	0
139	Sodium/potassium-transporting ATPase subunit alpha-2 OS=Homo sapiens GN=ATP1A2 PE=1 SV=1	AT1A2_HUMAN		112	5.33	Homo sapiens	0	0	0	0	0	0	0	0	0	0	0	0	0	0	0.000940793
193	Suprabasin OS=Homo sapiens GN=SBSN PE=1 SV=2	SBSN_HUMAN		61	7.01	Homo sapiens	0	0	0	0	0	0	0	0	0	0.00146466	0	0	0	0	0
74	Transthyretin OS=Homo sapiens GN=TTR PE=1 SV=1	TTHY_HUMAN		16	5.58	Homo sapiens	0	0	0.0097894	0	0	0	0	0	0	0	0.00317364	0.0124894	0.00979067	0.00834641	0.0116121
107	Tropomyosin alpha-4 chain OS=Homo sapiens GN=TPM4 PE=1 SV=3	TPM4_HUMAN		29	4.36	Homo sapiens	0	0	0	0	0	0	0	0	0	0	0.00175097	0.00416252	0	0.00855155	0
189	Trypsin-1 OS=Homo sapiens GN=PRSS1 PE=1 SV=1	TRY1_HUMAN		27	6.49	Homo sapiens	0	0	0	0	0	0	0	0	0.00293978	0	0	0	0	0	0
174	Tubulin alpha-4A chain OS=Homo sapiens GN=TUBA4A PE=1 SV=1	TBA4A_HUMAN		50	4.69	Homo sapiens	0	0	0	0	0	0	0	0	0	0	0	0.000402302	0	0.000719878	0
195	Tubulin beta-1 chain OS=Homo sapiens GN=TUBB1 PE=1 SV=1	TBB1_HUMAN		50	4.82	Homo sapiens	0	0	0	0	0	0	0	0	0	0	0	0	0	0.000362733	0
114	Vitamin D-binding protein OS=Homo sapiens GN=GC PE=1 SV=1	VTDB_HUMAN		53	5.21	Homo sapiens	0	0	0.00112745	0	0	0	0	0	0	0	0	0.00226046	0.00112701	0.00133251	0
2	Vitronectin OS=Homo sapiens GN=VTN PE=1 SV=1	VTNC_HUMAN		54	5.54	Homo sapiens	0.0165112	0	0.0801733	0	0	0	0.00246609	0.00886199	0.00440859	0.00303864	0.117463	0.0595932	0.08018	0.0862606	0.136442
[truncated: 88 more columns]
